# Supplementary material for: A dynamic and integrated epigenetic program at distal regions orchestrates transcriptional responses to VEGFA
Source: HighWire-hosted journal article supplement (doi:10.1101/gr.239053.118), 2019-01-22
Supplement: Supplemental_Table_S1.xlsx [file Supplemental_Table_S1.xlsx]

## Sheet: NGStrack
Supplemental_Table_S1: Summary information of high throughput sequencing tracks. The sequencing types, source name, reference, ChIP-seq antibodies and the detailed descriptions were listed.
NGS Tracks
Title	Sequencing Type	Source Name	Description	Ref	GEO	Antibody	Uniquely Mapped Reads	Called Peaks
VEGF-0hour	RNA-seq	HUVEC	RNA-seq after VEGF stimulation for 0hour	This study		NA
VEGF-1hour	RNA-seq	HUVEC	RNA-seq after VEGF stimulation for 1hour	This study		NA
VEGF-4hour	RNA-seq	HUVEC	RNA-seq after VEGF stimulation for 4hour	This study		NA
VEGF-12hour	RNA-seq	HUVEC	RNA-seq after VEGF stimulation for 12hour	This study		NA
H3K4me1-0hour	ChIP-seq	HUVEC	H3K4me1 ChiP-seq after VEGF stimulation for 0hour	Nature Communications 2017	GSE93030	H3K4me1 9ug ab8895 (abcam)
H3K4me1-1hour	ChIP-seq	HUVEC	H3K4me1 ChiP-seq after VEGF stimulation for 1hour	This study		H3K4me1 9ug ab8895 (abcam)
H3K4me1-4hour	ChIP-seq	HUVEC	H3K4me1 ChiP-seq after VEGF stimulation for 4hour	This study		H3K4me1 9ug ab8895 (abcam)
H3K4me1-12hour	ChIP-seq	HUVEC	H3K4me1 ChiP-seq after VEGF stimulation for 12hour	This study		H3K4me1 9ug ab8895 (abcam)
H3K4me2-0hour	ChIP-seq	HUVEC	H3K4me2 ChiP-seq after VEGF stimulation for 0hour	Nature Communications 2017	GSE93030	H3K4me2
H3K4me2-1hour	ChIP-seq	HUVEC	H3K4me2 ChiP-seq after VEGF stimulation for 1hour	This study		H3K4me2
H3K4me2-4hour	ChIP-seq	HUVEC	H3K4me2 ChiP-seq after VEGF stimulation for 4hour	This study		H3K4me2
H3K4me2-12hour	ChIP-seq	HUVEC	H3K4me2 ChiP-seq after VEGF stimulation for 12hour	This study		H3K4me2
H3K4me3-0hour	ChIP-seq	HUVEC	H3K4me3 ChiP-seq after VEGF stimulation for 0hour	Nature Communications 2017	GSE93030	H3K4me3 6ug #39159 (active motif)
H3K4me3-1hour	ChIP-seq	HUVEC	H3K4me3 ChiP-seq after VEGF stimulation for 1hour	This study		H3K4me3 6ug #39159 (active motif)
H3K4me3-4hour	ChIP-seq	HUVEC	H3K4me3 ChiP-seq after VEGF stimulation for 4hour	This study		H3K4me3 6ug #39159 (active motif)
H3K4me3-12hour	ChIP-seq	HUVEC	H3K4me3 ChiP-seq after VEGF stimulation for 12hour	This study		H3K4me3 6ug #39159 (active motif)
H3K27me3-0hour	ChIP-seq	HUVEC	H3K27me3 ChiP-seq after VEGF stimulation for 0hour	Nature Communications 2017	GSE93030	H3K27me3 10ug (millipore, 17-622 )
H3K27me3-1hour	ChIP-seq	HUVEC	H3K27me3 ChiP-seq after VEGF stimulation for 1hour	This study		H3K27me3 10ug (millipore, 17-622 )
H3K27me3-4hour	ChIP-seq	HUVEC	H3K27me3 ChiP-seq after VEGF stimulation for 4hour	This study		H3K27me3 10ug (millipore, 17-622 )
H3K27me3-12hour	ChIP-seq	HUVEC	H3K27me3 ChiP-seq after VEGF stimulation for 12hour	This study		H3K27me3 10ug (millipore, 17-622 )
H3K27ac-0hour	ChIP-seq	HUVEC	H3K27ac ChiP-seq after VEGF stimulation for 0hour	Genome Res 2013	GSE41166	H3K27ac 6ug ab4729 (abcam)
H3K27ac-1hour	ChIP-seq	HUVEC	H3K27ac ChiP-seq after VEGF stimulation for 1hour	Genome Res 2013	GSE41166	H3K27ac 6ug ab4729 (abcam)
H3K27ac-4hour	ChIP-seq	HUVEC	H3K27ac ChiP-seq after VEGF stimulation for 4hour	Genome Res 2013	GSE41166	H3K27ac 6ug ab4729 (abcam)
H3K27ac-12hour	ChIP-seq	HUVEC	H3K27ac ChiP-seq after VEGF stimulation for 12hour	Genome Res 2013	GSE41166	H3K27ac 6ug ab4729 (abcam)
RNAPII-0hour	ChIP-seq	HUVEC	RNAPII ChIP-seq after VEGF stimulation for 0hour	Genome Biology 2016	GSE60872	PolII 6ug (millipore)
RNAPII-1hour	ChIP-seq	HUVEC	RNAPII ChIP-seq after VEGF stimulation for 1hour	This study		PolII 6ug (millipore)
RNAPII-4hour	ChIP-seq	HUVEC	RNAPII ChIP-seq after VEGF stimulation for 4hour	This study		PolII 6ug (millipore)
RNAPII-12hour	ChIP-seq	HUVEC	RNAPII ChIP-seq after VEGF stimulation for 12hour	This study		PolII 6ug (millipore)
ETS1-0hour	ChIP-seq	HUVEC	ETS1 ChIP-seq after VEGF stimulation for 0hour	Genome Res 2013	GSE41166	ETS1 5ug (santa cruz)
ETS1-1hour	ChIP-seq	HUVEC	ETS1 ChIP-seq after VEGF stimulation for 1hour	Genome Res 2013	GSE41166	ETS1 5ug (santa cruz)
ETS1-4hour	ChIP-seq	HUVEC	ETS1 ChIP-seq after VEGF stimulation for 4hour	Genome Res 2013	GSE41166	ETS1 5ug (santa cruz)
ETS1-12hour	ChIP-seq	HUVEC	ETS1 ChIP-seq after VEGF stimulation for 12hour	Genome Res 2013	GSE41166	ETS1 5ug (santa cruz)
ERG-0hour	ChIP-seq	HUVEC	ERG ChIP-seq after VEGF stimulation for 0hour	This study		ERG
ERG-1hour	ChIP-seq	HUVEC	ERG ChIP-seq after VEGF stimulation for 1hour	This study		ERG
ERG-4hour	ChIP-seq	HUVEC	ERG ChIP-seq after VEGF stimulation for 4hour	This study		ERG
ERG-12hour	ChIP-seq	HUVEC	ERG ChIP-seq after VEGF stimulation for 12hour	This study		ERG
FLI-0hour	ChIP-seq	HUVEC	FLI ChIP-seq after VEGF stimulation for 0hour	This study		FLI1
FLI-1hour	ChIP-seq	HUVEC	FLI ChIP-seq after VEGF stimulation for 1hour	This study		FLI1
FLI-4hour	ChIP-seq	HUVEC	FLI ChIP-seq after VEGF stimulation for 4hour	This study		FLI1
FLI-12hour	ChIP-seq	HUVEC	FLI ChIP-seq after VEGF stimulation for 12hour	This study		FLI1
JUN-0hour	ChIP-seq	HUVEC	JUN ChIP-seq after VEGF stimulation for 0hour	This study		JUN
JUN-1hour	ChIP-seq	HUVEC	JUN ChIP-seq after VEGF stimulation for 1hour	This study		JUN
JUN-4hour	ChIP-seq	HUVEC	JUN ChIP-seq after VEGF stimulation for 4hour	This study		JUN
JUN-12hour	ChIP-seq	HUVEC	JUN ChIP-seq after VEGF stimulation for 12hour	This study		JUN
RBPJ-0hour	ChIP-seq	HUVEC	RBPJ ChIP-seq after VEGF stimulation for 0hour	This study		RBPJ
RBPJ-1hour	ChIP-seq	HUVEC	RBPJ ChIP-seq after VEGF stimulation for 1hour	This study		RBPJ
RBPJ-4hour	ChIP-seq	HUVEC	RBPJ ChIP-seq after VEGF stimulation for 4hour	This study		RBPJ
RBPJ-12hour	ChIP-seq	HUVEC	RBPJ ChIP-seq after VEGF stimulation for 12hour	This study		RBPJ
GATA2-0hour	ChIP-seq	HUVEC	GATA2 ChIP-seq after VEGF stimulation for 0hour	This study		GATA2
GATA2-1hour	ChIP-seq	HUVEC	GATA2 ChIP-seq after VEGF stimulation for 1hour	This study		GATA2
GATA2-4hour	ChIP-seq	HUVEC	GATA2 ChIP-seq after VEGF stimulation for 4hour	This study		GATA2
GATA2-12hour	ChIP-seq	HUVEC	GATA2 ChIP-seq after VEGF stimulation for 12hour	This study		GATA2
p300-0hour	ChIP-seq	HUVEC	p300 ChIP-seq after VEGF stimulation for 0hour	Genome Res 2013	GSE41166	p300 5ug (sc-585x) santa cruz
p300-1hour	ChIP-seq	HUVEC	p300 ChIP-seq after VEGF stimulation for 1hour	Genome Res 2013	GSE41166	p300 5ug (sc-585x) santa cruz
p300-4hour	ChIP-seq	HUVEC	p300 ChIP-seq after VEGF stimulation for 4hour	Genome Res 2013	GSE41166	p300 5ug (sc-585x) santa cruz
p300-12hour	ChIP-seq	HUVEC	p300 ChIP-seq after VEGF stimulation for 12hour	Genome Res 2013	GSE41166	p300 5ug (sc-585x) santa cruz
EZH2-0hour	ChIP-seq	HUVEC	EZH2 ChIP-seq after VEGF stimulation for 0hour	This study		EZH2
EZH2-1hour	ChIP-seq	HUVEC	EZH2 ChIP-seq after VEGF stimulation for 1hour	This study		EZH2
EZH2-4hour	ChIP-seq	HUVEC	EZH2 ChIP-seq after VEGF stimulation for 4hour	This study		EZH2
EZH2-12hour	ChIP-seq	HUVEC	EZH2 ChIP-seq after VEGF stimulation for 12hour	This study		EZH2
histone-input	ChIP-seq	HUVEC	histone input	Genome Res 2013	GSE41166	NA
