# Supplementary material for: A dynamic and integrated epigenetic program at distal regions orchestrates transcriptional responses to VEGFA
Source: HighWire-hosted journal article supplement (doi:10.1101/gr.239053.118), 2019-01-22
Supplement: Supplemental_Table_S2.xlsx [file Supplemental_Table_S2.xlsx]

## Sheet: summary
Supplemental_Table_S2: Transcriptome profiles of all mRNA, DEG and MAF-regulatory genes.
sheet name	Content
mRNA	Table of all expressed mRNA at 0, 1, 4, 12 hour
DEG	Table of Differentially expressed genes (DEG) at 0, 1, 4, 12 hour
MAFs_targets	Table of potential MAF targets

## Sheet: mRNA
			Expression Table of mRNA at 0, 1, 4, 12 hour
tracking_id	class_code	nearest_ref_id	gene_id	gene_short_name	tss_id	locus	length	coverage	H0_FPKM	H0_conf_lo	H0_conf_hi	H0_status	H1_FPKM	H1_conf_lo	H1_conf_hi	H1_status	H4_FPKM	H4_conf_lo	H4_conf_hi	H4_status	H12_FPKM	H12_conf_lo	H12_conf_hi	H12_status
ENSG00000000003	-	-	ENSG00000000003	TSPAN6	-	X:99883666-99894988	-	-	48.7815	36.2547	61.3082	OK	52.7148	39.4136	66.016	OK	43.2215	32.126	54.317	OK	40.0262	29.8803	50.1721	OK
ENSG00000000005	-	-	ENSG00000000005	TNMD	-	X:99839798-99854882	-	-	0	0	0	OK	0	0	0	OK	0	0	0	OK	0	0	0	OK
ENSG00000000419	-	-	ENSG00000000419	DPM1	-	20:49505584-49575092	-	-	14.971	5.53474	24.4073	OK	16.465	6.6808	26.2491	OK	16.6747	7.2025	26.1469	OK	13.3467	4.59512	22.0983	OK
ENSG00000000457	-	-	ENSG00000000457	SCYL3	-	1:169631244-169863408	-	-	1.8062	0.646291	2.96611	OK	1.63625	0	3.61545	OK	1.29624	0.291058	2.30142	OK	1.5555	0.658152	2.45285	OK
ENSG00000000460	-	-	ENSG00000000460	C1orf112	-	1:169631244-169863408	-	-	2.57281	0.207585	4.93804	OK	3.15502	0	8.0744	OK	2.10938	0	4.83891	OK	1.38622	0	3.26356	OK
ENSG00000000938	-	-	ENSG00000000938	FGR	-	1:27938574-27961788	-	-	0	0	0	OK	0.107886	0	1.02382	OK	0	0	0	OK	0	0	0	OK
ENSG00000000971	-	-	ENSG00000000971	CFH	-	1:196621007-196716634	-	-	1.50087	0.147461	2.85429	OK	1.82137	0.232535	3.41021	OK	0.906161	0	1.81787	OK	1.25964	0.108988	2.4103	OK
ENSG00000001036	-	-	ENSG00000001036	FUCA2	-	6:143771943-143832827	-	-	20.7975	14.7088	26.8863	OK	15.9524	10.9446	20.9603	OK	17.3267	11.9582	22.6952	OK	17.0303	11.8838	22.1768	OK
ENSG00000001084	-	-	ENSG00000001084	GCLC	-	6:53362138-53481969	-	-	6.9856	2.18763	11.7836	OK	7.51182	1.47107	13.5526	OK	6.74691	3.42501	10.0688	OK	4.55724	1.76463	7.34985	OK
ENSG00000001167	-	-	ENSG00000001167	NFYA	-	6:40994771-41067715	-	-	9.96061	6.79266	13.1286	OK	8.41974	6.04778	10.7917	OK	11.3916	8.31631	14.4669	OK	9.55179	6.70953	12.3941	OK
ENSG00000001460	-	-	ENSG00000001460	STPG1	-	1:24634045-24799466	-	-	2.87433	0	6.51765	OK	2.33377	0	5.24922	OK	2.55301	0	6.34056	OK	2.7213	0	6.0308	OK
ENSG00000001461	-	-	ENSG00000001461	NIPAL3	-	1:24634045-24799466	-	-	3.78094	1.78036	5.78152	OK	2.76706	1.23915	4.29497	OK	2.51154	1.14672	3.87637	OK	3.57579	1.81212	5.33946	OK
ENSG00000001497	-	-	ENSG00000001497	LAS1L	-	X:64732461-64754655	-	-	3.59125	2.21765	4.96484	OK	4.09112	2.66949	5.51276	OK	5.84632	1.97271	9.71992	OK	4.67948	2.81741	6.54155	OK
ENSG00000001561	-	-	ENSG00000001561	ENPP4	-	6:46097729-46114436	-	-	1.2553	0.703799	1.80679	OK	1.19413	0.659849	1.72841	OK	1.20382	0.667527	1.74011	OK	1.45956	0.861172	2.05795	OK
ENSG00000001617	-	-	ENSG00000001617	SEMA3F	-	3:49977439-50226508	-	-	21.6127	0	46.3196	OK	10.8679	0	24.4134	OK	22.5615	0	51.2086	OK	18.4198	0	38.795	OK
ENSG00000001626	-	-	ENSG00000001626	CFTR	-	7:117105837-117514193	-	-	0	0	0	OK	1.27877	0	5.26057	OK	0	0	0	OK	0.00777866	0	3.5466	OK
ENSG00000001629	-	-	ENSG00000001629	ANKIB1	-	7:91875547-92030698	-	-	11.4848	0.343181	22.6264	OK	9.60635	3.26197	15.9507	OK	11.9638	4.87577	19.0519	OK	7.08992	2.44006	11.7398	OK
ENSG00000001630	-	-	ENSG00000001630	CYP51A1	-	7:91741464-91810039	-	-	44.4032	33.7779	55.0284	OK	54.4629	41.1648	67.7611	OK	58.4912	44.7742	72.2082	OK	47.3915	36.0045	58.7786	OK
ENSG00000001631	-	-	ENSG00000001631	KRIT1	-	7:91828282-91875480	-	-	12.2042	4.88185	19.5265	OK	11.7628	4.6783	18.8472	OK	12.8268	7.10103	18.5526	OK	11.6095	5.89306	17.3259	OK
ENSG00000002016	-	-	ENSG00000002016	RAD52	-	12:1021242-1605099	-	-	6.18505	0	16.5762	OK	3.12839	0	9.53136	OK	7.84504	0	20.4726	OK	3.52893	0	8.86188	OK
ENSG00000002079	-	-	ENSG00000002079	MYH16	-	7:98836416-98908753	-	-	0.135455	0	1.98209	OK	0.110456	0	2.07959	OK	0.0552251	0	1.98675	OK	0.122488	0	1.98145	OK
ENSG00000002330	-	-	ENSG00000002330	BAD	-	11:64037301-64056972	-	-	6.33553	0	13.8971	OK	1.99276	0	5.52916	OK	6.62796	0.096025	13.1599	OK	7.46018	0.202368	14.718	OK
ENSG00000002549	-	-	ENSG00000002549	LAP3	-	4:17578814-17616194	-	-	53.0813	38.8063	67.3563	OK	43.7592	32.2483	55.2701	OK	43.5115	32.5083	54.5146	OK	31.8855	23.3874	40.3837	OK
ENSG00000002586	-	-	ENSG00000002586	CD99	-	X:2609219-2659350	-	-	163.256	123.774	202.738	OK	138.841	105.147	172.534	OK	162.172	121.926	202.418	OK	165.28	125.637	204.923	OK
ENSG00000002587	-	-	ENSG00000002587	HS3ST1	-	4:11394773-11431389	-	-	0.0578999	0	1.03964	OK	0.0699522	0	1.05012	OK	0.266038	0	1.67222	OK	0.201453	0	1.42033	OK
ENSG00000002726	-	-	ENSG00000002726	AOC1	-	7:150521714-150558592	-	-	0.0777818	0	0.805351	OK	0	0	0	OK	0	0	0	OK	0	0	0	OK
ENSG00000002745	-	-	ENSG00000002745	WNT16	-	7:120965420-120981158	-	-	0	0	0	OK	0	0	0	OK	0.0740599	0	0.387622	OK	0.0301447	0	0.285	OK
ENSG00000002746	-	-	ENSG00000002746	HECW1	-	7:43152197-43605600	-	-	0	0	0	OK	0.526589	0	2.49126	OK	0.399628	0	2.58764	OK	0.183112	0	2.3648	OK
ENSG00000002822	-	-	ENSG00000002822	MAD1L1	-	7:1855428-2272878	-	-	8.12087	2.77685	13.4649	OK	10.6204	3.94919	17.2916	OK	8.96278	3.12183	14.8037	OK	13.7151	5.23628	22.194	OK
ENSG00000002834	-	-	ENSG00000002834	LASP1	-	17:37026111-37078023	-	-	57.1286	41.7787	72.4786	OK	56.7223	42.3858	71.0588	OK	53.3048	37.5574	69.0521	OK	56.8375	40.8763	72.7987	OK
ENSG00000002919	-	-	ENSG00000002919	SNX11	-	17:46180718-46200436	-	-	6.17033	0.367397	11.9733	OK	2.97619	0	6.32467	OK	4.6206	0.373421	8.86779	OK	4.03598	0.582085	7.48988	OK
ENSG00000002933	-	-	ENSG00000002933	TMEM176A	-	7:150488372-150502208	-	-	0	0	0	OK	0	0	0	OK	0	0	0	OK	0	0	0	OK
ENSG00000003056	-	-	ENSG00000003056	M6PR	-	12:9066491-9102551	-	-	29.0803	14.1018	44.0588	OK	18.5119	10.2535	26.7703	OK	25.8445	14.8407	36.8483	OK	19.1037	11.6282	26.5792	OK
ENSG00000003096	-	-	ENSG00000003096	KLHL13	-	X:117031775-117251303	-	-	4.93604	1.87155	8.00052	OK	4.25958	2.16724	6.35192	OK	2.87244	0.166295	5.57858	OK	2.55524	0.736442	4.37404	OK
ENSG00000003137	-	-	ENSG00000003137	CYP26B1	-	2:72356366-72375167	-	-	0.0973175	0	1.06262	OK	0.117317	0	1.17132	OK	0.0382533	0	1.0011	OK	0.0652041	0	0.9845	OK
ENSG00000003147	-	-	ENSG00000003147	ICA1	-	7:8152813-8384146	-	-	18.0436	11.178	24.9092	OK	23.7255	10.3515	37.0996	OK	16.2867	8.09319	24.4802	OK	25.7846	11.463	40.1062	OK
ENSG00000003249	-	-	ENSG00000003249	DBNDD1	-	16:90071272-90114181	-	-	15.7321	9.52554	21.9386	OK	11.3292	6.72738	15.9311	OK	13.2286	7.79831	18.6588	OK	13.3163	8.07247	18.5601	OK
ENSG00000003393	-	-	ENSG00000003393	ALS2	-	2:202565276-202645912	-	-	8.72931	3.03871	14.4199	OK	6.79092	3.34222	10.2396	OK	7.9077	4.0389	11.7765	OK	6.50732	3.04591	9.96874	OK
ENSG00000003400	-	-	ENSG00000003400	CASP10	-	2:202047603-202094129	-	-	11.8693	6.3848	17.3538	OK	8.76647	4.93451	12.5984	OK	9.19497	5.47105	12.9189	OK	11.1169	7.09751	15.1363	OK
ENSG00000003402	-	-	ENSG00000003402	CFLAR	-	2:201980826-202041410	-	-	37.9149	20.9537	54.8761	OK	50.2416	20.0194	80.4638	OK	54.7177	23.3226	86.1128	OK	44.2526	16.1647	72.3404	OK
ENSG00000003436	-	-	ENSG00000003436	TFPI	-	2:187866602-188430487	-	-	201.328	129.037	273.619	OK	195.611	127.398	263.825	OK	135.442	74.6113	196.273	OK	75.3265	39.4798	111.173	OK
ENSG00000003509	-	-	ENSG00000003509	NDUFAF7	-	2:37394962-37551951	-	-	9.92584	0.00228675	19.8494	OK	8.59233	0	19.9777	OK	13.3057	0	30.1626	OK	8.15515	0	17.7553	OK
ENSG00000003756	-	-	ENSG00000003756	RBM5	-	3:49977439-50226508	-	-	61.3885	25.2228	97.5543	OK	60.2036	15.007	105.4	OK	60.5219	22.783	98.2609	OK	53.0752	17.8672	88.2832	OK
ENSG00000003987	-	-	ENSG00000003987	MTMR7	-	8:17086736-17271037	-	-	0.600048	0	2.60498	OK	0.659292	0	3.21772	OK	0.472224	0	2.39139	OK	0.632218	0	3.33651	OK
ENSG00000003989	-	-	ENSG00000003989	SLC7A2	-	8:17354596-17428082	-	-	1.69469	1.07446	2.31492	OK	3.30117	2.31828	4.28406	OK	2.3839	1.59834	3.16947	OK	1.05165	0.578004	1.52529	OK
ENSG00000004059	-	-	ENSG00000004059	ARF5	-	7:127220671-127242198	-	-	16.2079	6.917	25.4988	OK	13.3432	4.9495	21.7369	OK	18.706	8.26508	29.1469	OK	24.8409	14.4571	35.2247	OK
ENSG00000004139	-	-	ENSG00000004139	SARM1	-	17:26684603-26734215	-	-	0.703992	0	2.20453	OK	0.678119	0	2.62202	OK	0.679919	0	2.27545	OK	1.11193	0	3.82564	OK
ENSG00000004142	-	-	ENSG00000004142	POLDIP2	-	17:26662627-26684545	-	-	27.5752	17.7144	37.4359	OK	34.3027	22.0525	46.5529	OK	32.3894	20.0093	44.7695	OK	31.5735	16.4028	46.7443	OK
ENSG00000004399	-	-	ENSG00000004399	PLXND1	-	3:129274017-129325661	-	-	306.564	201.797	411.331	OK	307.471	202.438	412.505	OK	328.486	215.29	441.682	OK	455.653	299.553	611.754	OK
ENSG00000004455	-	-	ENSG00000004455	AK2	-	1:33452552-33546597	-	-	19.1995	11.9998	26.3991	OK	24.68	14.3943	34.9656	OK	25.3244	16.1171	34.5317	OK	24.9569	15.1176	34.7962	OK
ENSG00000004468	-	-	ENSG00000004468	CD38	-	4:15779897-15854853	-	-	0.579243	0	2.24389	OK	0.21196	0	1.18546	OK	0.0542125	0	1.07202	OK	0.321033	0	1.46377	OK
ENSG00000004478	-	-	ENSG00000004478	FKBP4	-	12:2904118-3050306	-	-	17.1548	8.4724	25.8372	OK	18.5174	7.71084	29.324	OK	16.8537	3.78084	29.9266	OK	18.0206	6.47325	29.5679	OK
ENSG00000004487	-	-	ENSG00000004487	KDM1A	-	1:23345940-23504301	-	-	41.8951	22.7318	61.0584	OK	37.401	20.4583	54.3437	OK	44.929	23.9205	65.9374	OK	39.848	20.467	59.2291	OK
ENSG00000004534	-	-	ENSG00000004534	RBM6	-	3:49977439-50226508	-	-	29.8695	3.50756	56.2315	OK	30.3633	2.98109	57.7455	OK	25.5213	6.21406	44.8286	OK	30.459	8.15075	52.7673	OK
ENSG00000004660	-	-	ENSG00000004660	CAMKK1	-	17:3763608-3798185	-	-	0.902412	0.342587	1.46224	OK	0.4749	0.0601237	0.889676	OK	0.616291	0.0499289	1.18265	OK	0.730308	0.214529	1.24609	OK
ENSG00000004700	-	-	ENSG00000004700	RECQL	-	12:21590548-21654603	-	-	21.0302	14.3251	27.7354	OK	22.8327	16.0279	29.6376	OK	28.0567	19.0912	37.0222	OK	24.4891	17.0643	31.914	OK
ENSG00000004766	-	-	ENSG00000004766	CCDC132	-	7:92861652-92988338	-	-	9.28773	3.48355	15.0919	OK	8.8339	2.26856	15.3992	OK	5.67977	0.887721	10.4718	OK	9.15024	3.05892	15.2415	OK
ENSG00000004776	-	-	ENSG00000004776	HSPB6	-	19:36245466-36248980	-	-	5.04163	1.50443	8.57883	OK	4.70595	1.2808	8.1311	OK	2.97963	0.511224	5.44803	OK	3.20961	0.724353	5.69488	OK
ENSG00000004777	-	-	ENSG00000004777	ARHGAP33	-	19:36265433-36279724	-	-	0.278742	0	3.02829	OK	0.395274	0	2.70667	OK	1.16553	0	3.81362	OK	0.50603	0	3.04989	OK
ENSG00000004779	-	-	ENSG00000004779	NDUFAB1	-	16:23592322-23607677	-	-	77.7442	54.3744	101.114	OK	87.7368	60.667	114.807	OK	80.0856	58.0245	102.147	OK	84.2661	61.4768	107.055	OK
ENSG00000004799	-	-	ENSG00000004799	PDK4	-	7:95212810-95225803	-	-	1.02208	0	2.38492	OK	0.761919	0	2.40624	OK	1.10722	0	2.70882	OK	1.35369	0	3.14237	OK
ENSG00000004809	-	-	ENSG00000004809	SLC22A16	-	6:110745889-110797844	-	-	0	0	0	OK	0	0	0	OK	0	0	0	OK	0.025217	0	1.35035	OK
ENSG00000004838	-	-	ENSG00000004838	ZMYND10	-	3:50378536-50384283	-	-	0.113252	0	1.77889	OK	0.178654	0	1.67234	OK	0.0626581	0	1.70376	OK	0	0	0	OK
ENSG00000004846	-	-	ENSG00000004846	ABCB5	-	7:20654829-20816658	-	-	0.142011	0	0.777059	OK	0.0560096	0	0.668242	OK	0.0278199	0	0.658971	OK	0.0631722	0	0.674754	OK
ENSG00000004848	-	-	ENSG00000004848	ARX	-	X:25021810-25034065	-	-	0	0	0	OK	0.0227332	0	0.175773	OK	0	0	0	OK	0	0	0	OK
ENSG00000004864	-	-	ENSG00000004864	SLC25A13	-	7:95749531-95951459	-	-	9.00468	4.90815	13.1012	OK	10.5045	5.2311	15.7779	OK	11.673	5.71293	17.6332	OK	10.5117	4.87532	16.148	OK
ENSG00000004866	-	-	ENSG00000004866	ST7	-	7:116592499-116870157	-	-	10.7686	4.13898	17.3983	OK	14.5977	6.36431	22.8311	OK	14.647	3.59725	25.6968	OK	8.8145	4.0765	13.5525	OK
ENSG00000004897	-	-	ENSG00000004897	CDC27	-	17:45195068-45266788	-	-	44.1962	12.1809	76.2115	OK	42.7726	19.0999	66.4453	OK	48.4043	22.9675	73.8412	OK	38.8207	17.5849	60.0564	OK
ENSG00000004939	-	-	ENSG00000004939	SLC4A1	-	17:42325752-42355825	-	-	0	0	0	OK	0	0	0	OK	1.7585e-07	0	1.12096	OK	3.06858e-08	0	1.1485	OK
ENSG00000004948	-	-	ENSG00000004948	CALCR	-	7:93053798-93204042	-	-	0	0	0	OK	0	0	0	OK	0	0	0	OK	0	0	0	OK
ENSG00000004961	-	-	ENSG00000004961	HCCS	-	X:11129420-11683821	-	-	12.4949	8.3077	16.6821	OK	15.2688	10.5557	19.9819	OK	16.7136	11.4596	21.9676	OK	16.5834	10.719	22.4479	OK
ENSG00000004975	-	-	ENSG00000004975	DVL2	-	17:7128659-7137864	-	-	5.65873	1.80922	9.50824	OK	5.49336	0.252411	10.7343	OK	5.83016	1.32714	10.3332	OK	4.67579	0.764656	8.58692	OK
ENSG00000005001	-	-	ENSG00000005001	PRSS22	-	16:2902727-2909727	-	-	0	0	0	OK	0	0	0	OK	0	0	0	OK	0	0	0	OK
ENSG00000005007	-	-	ENSG00000005007	UPF1	-	19:18942746-18979045	-	-	14.6601	8.87117	20.4491	OK	11.3376	6.40977	16.2655	OK	13.4398	8.67758	18.2019	OK	16.3624	9.24971	23.4751	OK
ENSG00000005020	-	-	ENSG00000005020	SKAP2	-	7:26706680-27034858	-	-	11.9836	8.62118	15.3459	OK	13.0635	8.83122	17.2959	OK	11.4534	7.9025	15.0044	OK	10.6345	7.63122	13.6377	OK
ENSG00000005022	-	-	ENSG00000005022	SLC25A5	-	X:118599996-118605282	-	-	140.937	100.567	181.307	OK	125.104	88.8859	161.323	OK	135.134	90.9282	179.34	OK	101.245	68.5455	133.944	OK
ENSG00000005059	-	-	ENSG00000005059	CCDC109B	-	4:110481360-110624739	-	-	34.6231	18.2824	50.9637	OK	33.8411	14.2819	53.4002	OK	43.1633	11.6593	74.6673	OK	18.7608	11.8029	25.7186	OK
ENSG00000005073	-	-	ENSG00000005073	HOXA11	-	7:27221128-27233067	-	-	1.80295	0	3.77097	OK	0.78382	0	1.69242	OK	3.82772	1.99843	5.65701	OK	1.88607	0.705634	3.06652	OK
ENSG00000005075	-	-	ENSG00000005075	POLR2J	-	7:102105375-102119354	-	-	20.5706	13.6106	27.5306	OK	21.8178	13.2034	30.4322	OK	18.6778	11.747	25.6086	OK	25.1495	16.8693	33.4297	OK
ENSG00000005100	-	-	ENSG00000005100	DHX33	-	17:5185557-5372380	-	-	5.76085	1.47324	10.0485	OK	5.69233	1.51903	9.86564	OK	6.30204	1.45026	11.1538	OK	4.73931	0.746514	8.7321	OK
ENSG00000005102	-	-	ENSG00000005102	MEOX1	-	17:41717755-41739322	-	-	0	0	0	OK	0.0115503	0	0.479952	OK	0.185644	0	0.659825	OK	0.060542	0	0.487327	OK
ENSG00000005108	-	-	ENSG00000005108	THSD7A	-	7:11221358-11871824	-	-	7.13897	4.35898	9.91895	OK	9.84392	6.30309	13.3848	OK	4.8086	2.7103	6.9069	OK	2.78138	1.15782	4.40493	OK
ENSG00000005156	-	-	ENSG00000005156	LIG3	-	17:33254877-33332083	-	-	6.33849	0	12.6849	OK	7.02757	0	18.4763	OK	6.70641	0.120358	13.2925	OK	6.41277	0	13.7257	OK
ENSG00000005175	-	-	ENSG00000005175	RPAP3	-	12:48057069-48099844	-	-	8.33658	5.58198	11.0912	OK	11.0212	6.58712	15.4553	OK	10.562	5.59392	15.5301	OK	8.80064	5.03386	12.5674	OK
ENSG00000005187	-	-	ENSG00000005187	ACSM3	-	16:20621564-20936328	-	-	0.840957	0	4.61742	OK	0.884873	0	5.0429	OK	0.204876	0	2.6229	OK	0.391592	0	3.03591	OK
ENSG00000005189	-	-	ENSG00000005189	AC004381.6	-	16:20621564-20936328	-	-	2.26615	0	8.13983	OK	1.69441	0	7.83939	OK	3.81511	0	12.3473	OK	0.735592	0	4.24407	OK
ENSG00000005194	-	-	ENSG00000005194	CIAPIN1	-	16:57462080-57521239	-	-	11.1618	2.59881	19.7247	OK	9.31873	3.1404	15.4971	OK	9.73821	3.20496	16.2715	OK	13.3017	3.62743	22.976	OK
ENSG00000005206	-	-	ENSG00000005206	SPPL2B	-	19:2321515-2355099	-	-	9.19015	2.29536	16.0849	OK	6.94963	1.77281	12.1264	OK	6.04995	1.46999	10.6299	OK	8.0602	1.82888	14.2915	OK
ENSG00000005238	-	-	ENSG00000005238	FAM214B	-	9:35104108-35116338	-	-	8.0579	5.15859	10.9572	OK	7.58014	4.94668	10.2136	OK	13.3789	9.1793	17.5786	OK	10.9326	7.47054	14.3946	OK
ENSG00000005243	-	-	ENSG00000005243	COPZ2	-	17:46103532-46115392	-	-	2.19702	0	6.7718	OK	1.44103	0	5.87581	OK	2.22472	0	5.37867	OK	4.79388	0	24.6808	OK
ENSG00000005249	-	-	ENSG00000005249	PRKAR2B	-	7:106685093-106802256	-	-	19.1073	14.1721	24.0426	OK	17.8655	13.352	22.379	OK	24.6911	18.6537	30.7284	OK	20.3821	15.2683	25.4959	OK
ENSG00000005302	-	-	ENSG00000005302	MSL3	-	X:11776277-11793870	-	-	29.5807	15.6492	43.5121	OK	27.6657	10.3262	45.0052	OK	29.2926	15.1428	43.4424	OK	23.9579	9.48526	38.4305	OK
ENSG00000005339	-	-	ENSG00000005339	CREBBP	-	16:3775054-3930727	-	-	10.0091	2.53548	17.4827	OK	7.80329	2.77192	12.8347	OK	10.6237	1.80938	19.4381	OK	7.79174	1.71154	13.8719	OK
ENSG00000005379	-	-	ENSG00000005379	BZRAP1	-	17:56378591-56494956	-	-	0	0	0	OK	0.00668257	0	1.65185	OK	0	0	0	OK	0	0	0	OK
ENSG00000005381	-	-	ENSG00000005381	MPO	-	17:56347216-56358296	-	-	0	0	0	OK	0.139643	0	2.17665	OK	0	0	0	OK	0	0	0	OK
ENSG00000005421	-	-	ENSG00000005421	PON1	-	7:94926987-95025680	-	-	0.0578835	0	1.04187	OK	0.0220391	0	1.09134	OK	0.0270989	0	1.00751	OK	0.0221054	0	1.00858	OK
ENSG00000005436	-	-	ENSG00000005436	GCFC2	-	2:75873908-75938115	-	-	6.61414	0	15.1665	OK	8.01283	0.821762	15.2039	OK	4.30566	0	8.98278	OK	6.38417	0	13.0652	OK
ENSG00000005448	-	-	ENSG00000005448	WDR54	-	2:74648804-74652882	-	-	13.3146	7.27785	19.3513	OK	11.4996	6.27303	16.7262	OK	11.1577	5.45349	16.862	OK	18.5661	11.2756	25.8565	OK
ENSG00000005469	-	-	ENSG00000005469	CROT	-	7:86974996-87029111	-	-	6.68425	1.26297	12.1055	OK	6.22596	1.25597	11.196	OK	1.91768	0.209097	3.62626	OK	2.05976	0	4.19942	OK
ENSG00000005471	-	-	ENSG00000005471	ABCB4	-	7:87031012-87109751	-	-	0.381205	0	1.97065	OK	0	0	0	OK	0.0225458	0	1.4988	OK	0.0487076	0	1.34574	OK
ENSG00000005483	-	-	ENSG00000005483	KMT2E	-	7:104653871-105039755	-	-	27.755	13.7975	41.7125	OK	33.4556	15.1397	51.7715	OK	27.8582	13.4657	42.2506	OK	30.2799	13.2889	47.2708	OK
ENSG00000005486	-	-	ENSG00000005486	RHBDD2	-	7:75471919-75518244	-	-	12.4503	3.64507	21.2556	OK	14.0346	7.56629	20.5028	OK	10.1094	4.2139	16.0048	OK	13.5375	0	29.1966	OK
ENSG00000005513	-	-	ENSG00000005513	SOX8	-	16:1031807-1036979	-	-	0.10011	0	0.322433	OK	0.516508	0	1.04979	OK	0.530021	0	1.07856	OK	0.228808	0	0.594916	OK
ENSG00000005700	-	-	ENSG00000005700	IBTK	-	6:82879699-82957471	-	-	16.5663	8.94928	24.1833	OK	18.0358	12.5466	23.5251	OK	29.9998	20.9927	39.007	OK	16.2471	10.0816	22.4126	OK
ENSG00000005801	-	-	ENSG00000005801	ZNF195	-	11:3357950-3400448	-	-	20.4656	9.20169	31.7295	OK	18.0555	9.30359	26.8075	OK	13.7665	6.90741	20.6256	OK	14.3759	8.10293	20.649	OK
ENSG00000005810	-	-	ENSG00000005810	MYCBP2	-	13:77618791-77901185	-	-	11.2739	2.42967	20.1181	OK	12.972	0.966202	24.9779	OK	11.8546	3.72901	19.9801	OK	14.4316	1.93193	26.9312	OK
ENSG00000005812	-	-	ENSG00000005812	FBXL3	-	13:77564794-77601330	-	-	18.0782	10.4606	25.6959	OK	20.8608	12.7031	29.0186	OK	18.862	10.0381	27.6858	OK	17.7714	9.47521	26.0676	OK
ENSG00000005844	-	-	ENSG00000005844	ITGAL	-	16:30483978-30534506	-	-	0.0495094	0	3.56312	OK	0.569822	0	3.19653	OK	0.00594765	0	3.50358	OK	0.224908	0	2.74389	OK
ENSG00000005882	-	-	ENSG00000005882	PDK2	-	17:48172100-48207246	-	-	21.3569	10.0321	32.6816	OK	13.7232	5.19484	22.2516	OK	12.0262	3.19313	20.8592	OK	11.7775	3.82153	19.7334	OK
ENSG00000005884	-	-	ENSG00000005884	ITGA3	-	17:48133331-48167845	-	-	32.9002	18.8641	46.9362	OK	21.901	10.8921	32.91	OK	30.8703	16.101	45.6397	OK	30.9468	17.2116	44.682	OK
ENSG00000005889	-	-	ENSG00000005889	ZFX	-	X:24164341-24234372	-	-	8.19623	3.0244	13.3681	OK	7.13224	2.44714	11.8173	OK	6.13505	1.99338	10.2767	OK	4.5525	0.466411	8.63859	OK
ENSG00000005893	-	-	ENSG00000005893	LAMP2	-	X:119561681-119603220	-	-	55.2523	41.6077	68.8968	OK	57.5618	43.5717	71.5519	OK	61.0043	45.7401	76.2686	OK	57.6316	43.1472	72.116	OK
ENSG00000005955	-	-	ENSG00000005955	GGNBP2	-	17:34900736-34946278	-	-	20.6858	13.4664	27.9052	OK	24.4313	17.0517	31.8109	OK	24.8036	16.1882	33.419	OK	26.4782	17.41	35.5464	OK
ENSG00000005961	-	-	ENSG00000005961	ITGA2B	-	17:42449547-42466873	-	-	0	0	0	OK	0.0235237	0	2.50016	OK	0.228991	0	2.33753	OK	0	0	0	OK
ENSG00000005981	-	-	ENSG00000005981	ASB4	-	7:95107755-95169544	-	-	0	0	0	OK	0.0192739	0	0.658255	OK	0.12257	0	0.899923	OK	0.0200129	0	0.644307	OK
ENSG00000006007	-	-	ENSG00000006007	GDE1	-	16:19513010-19533467	-	-	21.7597	15.8222	27.6972	OK	19.8455	14.1774	25.5136	OK	18.3132	13.2776	23.3489	OK	22.2589	16.421	28.0969	OK
ENSG00000006015	-	-	ENSG00000006015	C19orf60	-	19:18682539-18731849	-	-	13.0701	0	32.2957	OK	12.3993	0	31.0109	OK	13.1455	0	33.8056	OK	14.5696	0	35.3462	OK
ENSG00000006016	-	-	ENSG00000006016	CRLF1	-	19:18682539-18731849	-	-	4.35592	0	13.4832	OK	4.26828	0	14.0562	OK	5.05436	0	15.1825	OK	5.17612	0	16.6888	OK
ENSG00000006025	-	-	ENSG00000006025	OSBPL7	-	17:45884737-45899200	-	-	2.88712	0	6.60193	OK	1.0284	0	2.66501	OK	1.98598	0	3.98982	OK	2.69091	0.239222	5.14259	OK
ENSG00000006042	-	-	ENSG00000006042	TMEM98	-	17:31254927-31272124	-	-	22.8474	15.5753	30.1195	OK	19.668	11.6231	27.7129	OK	24.7703	16.3992	33.1414	OK	20.7742	13.8957	27.6527	OK
ENSG00000006047	-	-	ENSG00000006047	YBX2	-	17:7184985-7197934	-	-	0	0	0	OK	0.026233	0	1.17245	OK	0.0215233	0	1.16906	OK	0	0	0	OK
ENSG00000006059	-	-	ENSG00000006059	KRT33A	-	17:39502343-39507064	-	-	0	0	0	OK	0	0	0	OK	0	0	0	OK	0	0	0	OK
ENSG00000006062	-	-	ENSG00000006062	MAP3K14	-	17:43268297-43394414	-	-	0.58526	0	1.32659	OK	0.499901	0	1.3222	OK	0.600772	0	1.44472	OK	0.692645	0	1.51485	OK
ENSG00000006071	-	-	ENSG00000006071	ABCC8	-	11:17414431-17498449	-	-	0	0	0	OK	0	0	0	OK	0	0	0	OK	0	0	0	OK
ENSG00000006074	-	-	ENSG00000006074	CCL18	-	17:34391639-34399392	-	-	0	0	0	OK	0	0	0	OK	0	0	0	OK	0	0	0	OK
ENSG00000006075	-	-	ENSG00000006075	CCL3	-	17:34400225-34417515	-	-	0	0	0	OK	0	0	0	OK	0	0	0	OK	0	0	0	OK
ENSG00000006114	-	-	ENSG00000006114	SYNRG	-	17:35874899-35969544	-	-	7.77948	1.84028	13.7187	OK	5.47619	2.04854	8.90384	OK	7.62038	2.61937	12.6214	OK	6.13832	2.58764	9.689	OK
ENSG00000006116	-	-	ENSG00000006116	CACNG3	-	16:24266873-24374122	-	-	0	0	0	OK	0	0	0	OK	0	0	0	OK	0	0	0	OK
ENSG00000006118	-	-	ENSG00000006118	TMEM132A	-	11:60680637-60720002	-	-	15.6094	0.0722154	31.1466	OK	18.3472	4.1745	32.52	OK	19.8724	5.47526	34.2696	OK	20.6994	1.9427	39.4561	OK
ENSG00000006125	-	-	ENSG00000006125	AP2B1	-	17:33901813-34053436	-	-	43.9575	22.2009	65.7142	OK	39.2467	20.6983	57.795	OK	43.6411	23.4759	63.8064	OK	35.6305	23.8609	47.4002	OK
ENSG00000006128	-	-	ENSG00000006128	TAC1	-	7:97361219-97369784	-	-	0	0	0	OK	0	0	0	OK	0	0	0	OK	0	0	0	OK
ENSG00000006194	-	-	ENSG00000006194	ZNF263	-	16:3313742-3368852	-	-	5.20996	1.62426	8.79565	OK	6.57262	2.18173	10.9635	OK	8.16226	3.58349	12.741	OK	7.09324	3.20232	10.9842	OK
ENSG00000006210	-	-	ENSG00000006210	CX3CL1	-	16:57406369-57418960	-	-	0.484803	0	1.21811	OK	0.99328	0.11872	1.86784	OK	0.744781	0	1.64519	OK	0.388748	0	1.09017	OK
ENSG00000006282	-	-	ENSG00000006282	SPATA20	-	17:48609903-48633213	-	-	8.79527	4.61711	12.9734	OK	4.83212	1.76045	7.90378	OK	6.03566	2.74806	9.32325	OK	8.66349	3.52226	13.8047	OK
ENSG00000006283	-	-	ENSG00000006283	CACNA1G	-	17:48633567-48709301	-	-	0	0	0	OK	0	0	0	OK	0	0	0	OK	0	0	0	OK
ENSG00000006327	-	-	ENSG00000006327	TNFRSF12A	-	16:3064712-3072384	-	-	21.1241	13.4975	28.7508	OK	31.7175	3.75198	59.6831	OK	21.9176	13.6437	30.1914	OK	25.6485	16.3163	34.9808	OK
ENSG00000006377	-	-	ENSG00000006377	DLX6	-	7:96584452-96643377	-	-	0	0	0	OK	0	0	0	OK	0	0	0	OK	0	0	0	OK
ENSG00000006432	-	-	ENSG00000006432	MAP3K9	-	14:71189242-71276251	-	-	0.0633737	0	0.718417	OK	0.00722406	0	0.678096	OK	0.00370873	0	0.670458	OK	0	0	0	OK
ENSG00000006451	-	-	ENSG00000006451	RALA	-	7:39663081-39747723	-	-	190.706	135.962	245.45	OK	211.224	152.18	270.268	OK	161.288	117.518	205.059	OK	96.2867	68.7207	123.853	OK
ENSG00000006453	-	-	ENSG00000006453	BAIAP2L1	-	7:97881690-98030380	-	-	0.934987	0	2.61853	OK	0.991301	0	2.82306	OK	0.522408	0	1.98759	OK	0.37906	0	1.63426	OK
ENSG00000006459	-	-	ENSG00000006459	KDM7A	-	7:139784545-139876835	-	-	1.53485	0.781827	2.28788	OK	3.32331	1.59786	5.04877	OK	4.69122	1.2898	8.09263	OK	2.11016	1.18867	3.03164	OK
ENSG00000006468	-	-	ENSG00000006468	ETV1	-	7:13930852-14031050	-	-	5.41456	1.52955	9.29957	OK	3.35774	0.191303	6.52417	OK	8.22408	2.79647	13.6517	OK	4.05785	1.01101	7.10468	OK
ENSG00000006530	-	-	ENSG00000006530	AGK	-	7:141229002-141401953	-	-	7.97063	3.01081	12.9305	OK	7.40343	2.36403	12.4428	OK	6.98344	3.12507	10.8418	OK	8.83586	3.98283	13.6889	OK
ENSG00000006534	-	-	ENSG00000006534	ALDH3B1	-	11:67776047-67797928	-	-	0.167936	0	1.33439	OK	0.202847	0	1.37587	OK	0.171046	0	1.50657	OK	0.150321	0	1.2859	OK
ENSG00000006555	-	-	ENSG00000006555	TTC22	-	1:55245384-55266940	-	-	0	0	0	OK	0.0143376	0	0.827416	OK	0.132353	0	0.927301	OK	0.0955367	0	0.92199	OK
ENSG00000006576	-	-	ENSG00000006576	PHTF2	-	7:77428121-77586818	-	-	3.50717	0.193551	6.82078	OK	4.11348	0.638791	7.58816	OK	5.83361	2.27801	9.38921	OK	3.58175	0.618558	6.54494	OK
ENSG00000006606	-	-	ENSG00000006606	CCL26	-	7:75398850-75419214	-	-	0	0	0	OK	0	0	0	OK	0	0	0	OK	0	0	0	OK
ENSG00000006607	-	-	ENSG00000006607	FARP2	-	2:242295657-242449145	-	-	9.30242	1.34706	17.2578	OK	12.7861	0	29.0862	OK	7.79344	1.07484	14.512	OK	8.81978	0	17.8443	OK
ENSG00000006611	-	-	ENSG00000006611	USH1C	-	11:17515441-17565963	-	-	0	0	0	OK	0	0	0	OK	0	0	0	OK	0	0	0	OK
ENSG00000006625	-	-	ENSG00000006625	GGCT	-	7:30536236-30673649	-	-	37.3693	17.1072	57.6313	OK	39.0211	16.0524	61.9897	OK	39.5509	12.3446	66.7572	OK	43.4355	18.3582	68.5127	OK
ENSG00000006634	-	-	ENSG00000006634	DBF4	-	7:87462882-87538856	-	-	4.25424	1.56161	6.94688	OK	4.29104	2.10891	6.47317	OK	5.22228	1.95705	8.48752	OK	3.41385	1.31425	5.51345	OK
ENSG00000006638	-	-	ENSG00000006638	TBXA2R	-	19:3594503-3606838	-	-	0.208883	0	1.13077	OK	0.892945	0	2.11178	OK	2.17833	0.274345	4.08232	OK	1.59654	0	3.23352	OK
ENSG00000006652	-	-	ENSG00000006652	IFRD1	-	7:112063022-112131117	-	-	9.84399	2.21645	17.4715	OK	25.1589	16.6847	33.633	OK	26.2789	11.8468	40.7109	OK	16.4731	8.67161	24.2746	OK
ENSG00000006659	-	-	ENSG00000006659	LGALS14	-	19:40194945-40200084	-	-	0	0	0	OK	0	0	0	OK	0	0	0	OK	0	0	0	OK
ENSG00000006695	-	-	ENSG00000006695	COX10	-	17:13972812-14111994	-	-	4.05789	2.29992	5.81587	OK	3.40497	1.75874	5.05121	OK	3.26844	1.46126	5.07562	OK	4.20176	2.39723	6.00628	OK
ENSG00000006704	-	-	ENSG00000006704	GTF2IRD1	-	7:73868119-74016931	-	-	7.3494	3.44838	11.2504	OK	4.1274	0	8.74345	OK	4.06132	1.56913	6.5535	OK	7.61175	1.42482	13.7987	OK
ENSG00000006712	-	-	ENSG00000006712	PAF1	-	19:39876491-39881835	-	-	20.7179	10.7158	30.72	OK	20.7332	9.17564	32.2908	OK	20.5614	12.124	28.9989	OK	18.5593	11.6347	25.484	OK
ENSG00000006715	-	-	ENSG00000006715	VPS41	-	7:38762562-38971994	-	-	24.859	12.3222	37.3959	OK	29.6932	14.6091	44.7772	OK	23.1774	10.9338	35.421	OK	20.621	8.69785	32.5441	OK
ENSG00000006740	-	-	ENSG00000006740	ARHGAP44	-	17:12569206-12894960	-	-	0.158349	0	1.34419	OK	0.15896	0	1.31878	OK	0.188759	0	1.47316	OK	0.160794	0	1.32743	OK
ENSG00000006744	-	-	ENSG00000006744	ELAC2	-	17:12895707-12921504	-	-	19.7838	11.7326	27.835	OK	17.268	9.61806	24.9178	OK	17.4751	8.96933	25.981	OK	19.1646	9.22401	29.1052	OK
ENSG00000006747	-	-	ENSG00000006747	SCIN	-	7:12609750-12693228	-	-	0	0	0	OK	0.196859	0	1.96015	OK	0.28543	0	2.01769	OK	0.418767	0	2.37618	OK
ENSG00000006756	-	-	ENSG00000006756	ARSD	-	X:2822010-2847392	-	-	4.62484	1.2539	7.99578	OK	5.10036	1.78892	8.4118	OK	4.59972	1.66558	7.53386	OK	5.46543	1.65415	9.27671	OK
ENSG00000006757	-	-	ENSG00000006757	PNPLA4	-	X:7866287-7895780	-	-	2.89583	0.376471	5.41519	OK	2.27974	0.534696	4.02479	OK	2.72261	0.637381	4.80784	OK	3.19837	0.92247	5.47427	OK
ENSG00000006788	-	-	ENSG00000006788	MYH13	-	17:10195136-10276447	-	-	0	0	0	OK	0	0	0	OK	0	0	0	OK	0	0	0	OK
ENSG00000006831	-	-	ENSG00000006831	ADIPOR2	-	12:1797739-1897844	-	-	13.9337	9.18196	18.6855	OK	15.439	10.1079	20.77	OK	13.3418	9.07096	17.6126	OK	14.8664	9.88763	19.8451	OK
ENSG00000006837	-	-	ENSG00000006837	CDKL3	-	5:133450401-133706738	-	-	0.087733	0	1.6336	OK	0.439795	0	5.99123	OK	1.0361	0	11.0496	OK	0.507652	0	5.743	OK
ENSG00000007001	-	-	ENSG00000007001	UPP2	-	2:158733213-158992666	-	-	0	0	0	OK	0	0	0	OK	0	0	0	OK	0.0156963	0	0.585863	OK
ENSG00000007038	-	-	ENSG00000007038	PRSS21	-	16:2867163-2876305	-	-	0	0	0	OK	0	0	0	OK	0	0	0	OK	0	0	0	OK
ENSG00000007047	-	-	ENSG00000007047	MARK4	-	19:45574757-45808541	-	-	13.6396	6.17825	21.101	OK	11.1267	5.32595	16.9275	OK	21.0253	7.04339	35.0072	OK	12.0999	6.27812	17.9218	OK
ENSG00000007062	-	-	ENSG00000007062	PROM1	-	4:15961865-16086001	-	-	0.52988	0	3.7706	OK	0.016676	0	3.10632	OK	0	0	0	OK	0.0551308	0	2.41443	OK
ENSG00000007080	-	-	ENSG00000007080	CCDC124	-	19:18043824-18054800	-	-	20.6551	13.768	27.5422	OK	18.6505	12.7461	24.555	OK	22.034	15.0696	28.9984	OK	22.3419	15.6033	29.0805	OK
ENSG00000007129	-	-	ENSG00000007129	CEACAM21	-	19:42051553-42093197	-	-	0.349248	0	1.68314	OK	2.06897	0	4.98171	OK	0.405477	0	1.69928	OK	0.772532	0	2.78811	OK
ENSG00000007168	-	-	ENSG00000007168	PAFAH1B1	-	17:2496503-2588909	-	-	40.5394	21.0097	60.0691	OK	44.5238	24.1203	64.9273	OK	38.8739	20.5353	57.2125	OK	37.1841	21.2338	53.1343	OK
ENSG00000007171	-	-	ENSG00000007171	NOS2	-	17:26083791-26221778	-	-	0	0	0	OK	0	0	0	OK	0	0	0	OK	0.0269783	0	0.148725	OK
ENSG00000007174	-	-	ENSG00000007174	DNAH9	-	17:11501747-11900827	-	-	0.0692691	0	2.06871	OK	0.0688966	0	2.05041	OK	0.0324773	0	2.024	OK	0.029173	0	2.02469	OK
ENSG00000007202	-	-	ENSG00000007202	KIAA0100	-	17:26782769-26972472	-	-	28.263	4.62346	51.9026	OK	28.5743	6.7869	50.3617	OK	29.5087	5.24169	53.7758	OK	34.3625	12.3116	56.4133	OK
ENSG00000007216	-	-	ENSG00000007216	SLC13A2	-	17:26782769-26972472	-	-	0	0	0	OK	0	0	0	OK	0	0	0	OK	0	0	0	OK
ENSG00000007237	-	-	ENSG00000007237	GAS7	-	17:9813925-10101868	-	-	0.0538915	0	2.75205	OK	0.0589782	0	2.66837	OK	0	0	0	OK	0.0226842	0	2.07048	OK
ENSG00000007255	-	-	ENSG00000007255	TRAPPC6A	-	19:45574757-45808541	-	-	3.18463	0	8.38755	OK	2.82449	0	8.17056	OK	3.34225	0	10.5554	OK	3.49948	0	9.6261	OK
ENSG00000007264	-	-	ENSG00000007264	MATK	-	19:3777970-3802127	-	-	0	0	0	OK	0.119674	0	2.45558	OK	0	0	0	OK	0.128178	0	2.47899	OK
ENSG00000007306	-	-	ENSG00000007306	CEACAM7	-	19:42177234-42210895	-	-	0	0	0	OK	0.0430062	0	1.15292	OK	0.0165037	0	1.12403	OK	0	0	0	OK
ENSG00000007312	-	-	ENSG00000007312	CD79B	-	17:62006099-62009714	-	-	0.794426	0	2.82548	OK	0.0244604	0	1.57104	OK	0.0312827	0	1.54418	OK	0.0552014	0	1.66261	OK
ENSG00000007314	-	-	ENSG00000007314	SCN4A	-	17:62015913-62050278	-	-	0	0	0	OK	0	0	0	OK	0	0	0	OK	0.00868634	0	0.894541	OK
ENSG00000007341	-	-	ENSG00000007341	ST7L	-	1:113009162-113214241	-	-	12.9236	0	28.8248	OK	8.90458	0	20.3754	OK	7.6269	0	18.1004	OK	8.14241	0	19.2987	OK
ENSG00000007350	-	-	ENSG00000007350	TKTL1	-	X:153524023-153558700	-	-	0	0	0	OK	0.0464288	0	1.89863	OK	0	0	0	OK	0	0	0	OK
ENSG00000007372	-	-	ENSG00000007372	PAX6	-	11:31806339-32127301	-	-	0.107083	0	2.60635	OK	0.109326	0	2.55415	OK	0.0152868	0	2.44319	OK	0.0731817	0	2.54574	OK
ENSG00000007376	-	-	ENSG00000007376	RPUSD1	-	16:834973-850737	-	-	6.84943	2.83244	10.8664	OK	3.79252	0.905057	6.67998	OK	4.20294	0.707328	7.69856	OK	3.75439	0.352446	7.15634	OK
ENSG00000007384	-	-	ENSG00000007384	RHBDF1	-	16:108057-126354	-	-	18.0877	9.42427	26.751	OK	15.3601	7.66113	23.0591	OK	18.1172	10.5062	25.7282	OK	17.3248	9.32891	25.3207	OK
ENSG00000007392	-	-	ENSG00000007392	LUC7L	-	16:238967-279462	-	-	41.571	24.8346	58.3075	OK	32.3795	20.3135	44.4454	OK	37.169	21.6523	52.6856	OK	42.7142	27.242	58.1864	OK
ENSG00000007402	-	-	ENSG00000007402	CACNA2D2	-	3:50384760-50541675	-	-	0	0	0	OK	0.104982	0	0.63965	OK	0.157033	0	0.722366	OK	0.0979058	0	0.636858	OK
ENSG00000007516	-	-	ENSG00000007516	BAIAP3	-	16:1383601-1401912	-	-	0	0	0	OK	0.0948879	0	1.95241	OK	0	0	0	OK	0.0682571	0	1.92242	OK
ENSG00000007520	-	-	ENSG00000007520	TSR3	-	16:1383601-1401912	-	-	38.1995	26.2215	50.1776	OK	34.7039	24.7317	44.6761	OK	29.1624	20.4573	37.8675	OK	32.6941	23.3493	42.0389	OK
ENSG00000007541	-	-	ENSG00000007541	PIGQ	-	16:616994-634136	-	-	11.178	5.75092	16.6051	OK	6.8844	1.90693	11.8619	OK	8.81774	3.21526	14.4202	OK	9.91126	0	20.6241	OK
ENSG00000007545	-	-	ENSG00000007545	CRAMP1L	-	16:1662325-1752281	-	-	5.4588	0.508489	10.4091	OK	2.90128	0.324307	5.47826	OK	4.42264	1.31827	7.527	OK	4.81107	0	9.6512	OK
ENSG00000007866	-	-	ENSG00000007866	TEAD3	-	6:35441373-35464853	-	-	0.111851	0	0.671917	OK	0.0587955	0	0.601992	OK	0.0664685	0	0.635813	OK	0.306716	0	0.912755	OK
ENSG00000007908	-	-	ENSG00000007908	SELE	-	1:169631244-169863408	-	-	1.53966	0	3.10198	OK	25.0468	18.1828	31.9108	OK	8.44102	4.90409	11.9779	OK	1.09853	0	2.55411	OK
ENSG00000007923	-	-	ENSG00000007923	DNAJC11	-	1:6684925-6761984	-	-	11.7846	7.19631	16.3729	OK	15.1049	9.52994	20.6798	OK	14.2244	8.21356	20.2353	OK	12.8943	7.12883	18.6598	OK
ENSG00000007933	-	-	ENSG00000007933	FMO3	-	1:171060017-171086959	-	-	0	0	0	OK	0.267987	0	1.5949	OK	0	0	0	OK	0.133422	0	1.38229	OK
ENSG00000007944	-	-	ENSG00000007944	MYLIP	-	6:16129355-16148479	-	-	4.22883	2.65542	5.80224	OK	2.86943	1.6935	4.04536	OK	3.9911	2.4447	5.53749	OK	3.46353	2.11514	4.81192	OK
ENSG00000007952	-	-	ENSG00000007952	NOX1	-	X:100098312-100129334	-	-	0	0	0	OK	0	0	0	OK	0	0	0	OK	0	0	0	OK
ENSG00000007968	-	-	ENSG00000007968	E2F2	-	1:23832921-23857712	-	-	0.239044	0	0.890411	OK	0.188248	0	0.82719	OK	0.463671	0	1.73754	OK	0.0849818	0	0.716998	OK
ENSG00000008018	-	-	ENSG00000008018	PSMB1	-	6:170844204-170862429	-	-	159.598	121.919	197.276	OK	133.883	101.65	166.116	OK	171.535	130.883	212.187	OK	99.2644	74.8637	123.665	OK
ENSG00000008056	-	-	ENSG00000008056	SYN1	-	X:47420515-47479252	-	-	0.191349	0	0.824677	OK	0.112034	0	0.494357	OK	0.114083	0	0.480899	OK	0.0385337	0	0.312689	OK
ENSG00000008083	-	-	ENSG00000008083	JARID2	-	6:15246526-15522252	-	-	3.76469	0.505543	7.02384	OK	2.91327	1.20468	4.62187	OK	3.99822	2.48705	5.5094	OK	3.10126	1.7955	4.40702	OK
ENSG00000008086	-	-	ENSG00000008086	CDKL5	-	X:18443702-18690229	-	-	0.358109	0	0.832377	OK	0.162596	0	0.446413	OK	0.597752	0.0344549	1.16105	OK	0.192459	0	0.523815	OK
ENSG00000008118	-	-	ENSG00000008118	CAMK1G	-	1:209757061-209787283	-	-	0	0	0	OK	0	0	0	OK	0.0827175	0	0.892248	OK	0	0	0	OK
ENSG00000008128	-	-	ENSG00000008128	CDK11A	-	1:1634168-1677431	-	-	10.4286	4.08678	16.7704	OK	13.3321	4.96885	21.6954	OK	19.1699	5.85607	32.4836	OK	15.0824	7.80544	22.3594	OK
ENSG00000008130	-	-	ENSG00000008130	NADK	-	1:1682670-1711896	-	-	14.6138	8.73846	20.4891	OK	9.73782	4.76353	14.7121	OK	11.2973	5.91563	16.6791	OK	13.5886	7.7415	19.4358	OK
ENSG00000008196	-	-	ENSG00000008196	TFAP2B	-	6:50786435-50815326	-	-	0	0	0	OK	0	0	0	OK	0	0	0	OK	0	0	0	OK
ENSG00000008197	-	-	ENSG00000008197	TFAP2D	-	6:50681540-50740701	-	-	0	0	0	OK	0	0	0	OK	0	0	0	OK	0	0	0	OK
ENSG00000008226	-	-	ENSG00000008226	DLEC1	-	3:38080695-38178733	-	-	0	0	0	OK	0	0	0	OK	0	0	0	OK	0	0	0	OK
ENSG00000008256	-	-	ENSG00000008256	CYTH3	-	7:6201406-6312275	-	-	2.937	0.411004	5.46299	OK	2.89198	0	6.26741	OK	3.46158	0	7.64801	OK	3.6118	0.26749	6.95611	OK
ENSG00000008277	-	-	ENSG00000008277	ADAM22	-	7:87563457-87832204	-	-	0.148605	0	1.32536	OK	0.119578	0	1.24332	OK	0.0955417	0	1.21168	OK	0.168325	0	1.29744	OK
ENSG00000008282	-	-	ENSG00000008282	SYPL1	-	7:105730948-105753022	-	-	69.5053	52.3108	86.6997	OK	66.4199	49.6724	83.1675	OK	59.8653	44.7844	74.9462	OK	61.0348	45.9733	76.0962	OK
ENSG00000008283	-	-	ENSG00000008283	CYB561	-	17:61509664-61523739	-	-	13.3349	6.83704	19.8328	OK	10.0313	4.39951	15.663	OK	17.9029	9.55717	26.2487	OK	23.7337	14.5118	32.9556	OK
ENSG00000008294	-	-	ENSG00000008294	SPAG9	-	17:49039534-49198226	-	-	28.2416	11.1578	45.3255	OK	31.8378	8.32839	55.3471	OK	57.6274	23.4206	91.8342	OK	30.6328	11.5678	49.6979	OK
ENSG00000008300	-	-	ENSG00000008300	CELSR3	-	3:48673901-48700348	-	-	0.0521877	0	0.681675	OK	0.118224	0	0.769904	OK	0.0664066	0	0.762273	OK	0.175635	0	0.82921	OK
ENSG00000008311	-	-	ENSG00000008311	AASS	-	7:121715700-121784334	-	-	11.2043	7.75914	14.6495	OK	9.10131	6.24936	11.9533	OK	9.7398	6.7086	12.771	OK	9.78676	6.7672	12.8063	OK
ENSG00000008323	-	-	ENSG00000008323	PLEKHG6	-	12:6419601-6437672	-	-	0	0	0	OK	0.074154	0	2.32033	OK	0.44079	0	2.93138	OK	0.0203607	0	2.46255	OK
ENSG00000008324	-	-	ENSG00000008324	SS18L2	-	3:42589460-42709072	-	-	7.02963	0	19.6825	OK	12.839	0	29.8309	OK	20.2106	0	46.832	OK	15.6691	0	34.5582	OK
ENSG00000008382	-	-	ENSG00000008382	MPND	-	19:4343523-4360083	-	-	7.14244	1.65282	12.6321	OK	6.10674	0.0683634	12.1451	OK	8.72921	2.77386	14.6846	OK	6.59075	1.18943	11.9921	OK
ENSG00000008394	-	-	ENSG00000008394	MGST1	-	12:16500075-16763528	-	-	75.2407	50.1608	100.321	OK	68.8362	44.9615	92.7109	OK	58.9847	39.5027	78.4667	OK	54.4012	36.0179	72.7844	OK
ENSG00000008405	-	-	ENSG00000008405	CRY1	-	12:107385141-107517092	-	-	13.9545	8.5213	19.3876	OK	23.272	14.0408	32.5031	OK	38.9712	24.3914	53.5511	OK	21.4996	12.5811	30.4182	OK
ENSG00000008438	-	-	ENSG00000008438	PGLYRP1	-	19:46498338-46526323	-	-	0	0	0	OK	0	0	0	OK	1.03245	0	2.39997	OK	0	0	0	OK
ENSG00000008441	-	-	ENSG00000008441	NFIX	-	19:13106421-13209610	-	-	4.88486	1.45626	8.31346	OK	4.20666	0	8.66196	OK	2.49866	0	5.40641	OK	2.41299	0.284574	4.54141	OK
ENSG00000008513	-	-	ENSG00000008513	ST3GAL1	-	8:134467090-134584183	-	-	11.0103	4.66123	17.3594	OK	15.1069	6.39554	23.8183	OK	21.7767	13.383	30.1704	OK	21.3814	11.5223	31.2405	OK
ENSG00000008516	-	-	ENSG00000008516	MMP25	-	16:3096681-3110727	-	-	0	0	0	OK	1.28095	0	3.96154	OK	0.88474	0	3.34191	OK	0.429375	0	1.39388	OK
ENSG00000008517	-	-	ENSG00000008517	IL32	-	16:3115297-3137101	-	-	56.4281	40.8452	72.0109	OK	63.5284	46.6712	80.3857	OK	74.6106	55.5385	93.6827	OK	75.1138	55.8865	94.3411	OK
ENSG00000008710	-	-	ENSG00000008710	PKD1	-	16:2089815-2185899	-	-	8.56081	1.07823	16.0434	OK	5.55226	0	12.3282	OK	7.75735	0	17.8267	OK	6.63787	0	15.4466	OK
ENSG00000008735	-	-	ENSG00000008735	MAPK8IP2	-	22:51007289-51052409	-	-	0	0	0	OK	0.151059	0	0.577588	OK	0.0623371	0	0.404486	OK	0.105922	0	0.508608	OK
ENSG00000008838	-	-	ENSG00000008838	MED24	-	17:38175349-38256978	-	-	23.287	11.0337	35.5403	OK	15.6093	7.50815	23.7105	OK	21.4661	11.3582	31.5739	OK	19.7732	9.32693	30.2195	OK
ENSG00000008853	-	-	ENSG00000008853	RHOBTB2	-	8:22545171-22941132	-	-	1.56466	0	4.02754	OK	1.86264	0	8.67733	OK	3.22309	0	10.603	OK	2.15548	0	6.30882	OK
ENSG00000008869	-	-	ENSG00000008869	HEATR5B	-	2:37195525-37311485	-	-	9.6742	0.0948766	19.2535	OK	5.89299	0.233164	11.5528	OK	4.83903	1.42072	8.25735	OK	5.23845	0.791515	9.68539	OK
ENSG00000008952	-	-	ENSG00000008952	SEC62	-	3:169657140-169716161	-	-	54.5365	2.79846	106.275	OK	60.3808	13.5716	107.19	OK	53.2259	20.1407	86.3112	OK	64.4876	24.0761	104.899	OK
ENSG00000008988	-	-	ENSG00000008988	RPS20	-	8:56979853-56987069	-	-	620.039	465.435	774.644	OK	593.206	446.349	740.063	OK	612.329	459.359	765.299	OK	789.538	590.166	988.91	OK
ENSG00000009307	-	-	ENSG00000009307	CSDE1	-	1:115259533-115301297	-	-	140.682	100.746	180.619	OK	151.724	108.138	195.31	OK	148.95	104.446	193.454	OK	145.795	83.8443	207.745	OK
ENSG00000009335	-	-	ENSG00000009335	UBE3C	-	7:156931606-157062066	-	-	21.8323	15.9309	27.7338	OK	24.6228	16.4866	32.759	OK	27.2085	17.3228	37.0941	OK	23.9632	14.245	33.6814	OK
ENSG00000009413	-	-	ENSG00000009413	REV3L	-	6:111620233-111927481	-	-	6.44854	0.360798	12.5363	OK	6.43773	0.403991	12.4715	OK	7.58312	2.49407	12.6722	OK	5.66402	1.46164	9.8664	OK
ENSG00000009694	-	-	ENSG00000009694	TENM1	-	X:123093082-124097666	-	-	0	0	0	OK	0	0	0	OK	0	0	0	OK	0	0	0	OK
ENSG00000009709	-	-	ENSG00000009709	PAX7	-	1:18957499-19075360	-	-	0	0	0	OK	0	0	0	OK	0	0	0	OK	0	0	0	OK
ENSG00000009724	-	-	ENSG00000009724	MASP2	-	1:11086579-11107290	-	-	0.956336	0	2.14059	OK	0.358008	0	1.37922	OK	0.671782	0	1.79522	OK	0.893824	0	2.0311	OK
ENSG00000009765	-	-	ENSG00000009765	IYD	-	6:150690027-150727105	-	-	0.0884827	0	1.43523	OK	0.0853073	0	1.40444	OK	0.0252448	0	1.50521	OK	0.0642078	0	1.39596	OK
ENSG00000009780	-	-	ENSG00000009780	FAM76A	-	1:28052489-28089633	-	-	1.37096	0.655051	2.08688	OK	1.23702	0.523877	1.95016	OK	1.60094	0.72864	2.47325	OK	1.1807	0.49164	1.86976	OK
ENSG00000009790	-	-	ENSG00000009790	TRAF3IP3	-	1:209929376-209957904	-	-	0.939755	0	3.1258	OK	0.638968	0	2.67012	OK	0.825923	0	2.95595	OK	0.61646	0	2.68156	OK
ENSG00000009830	-	-	ENSG00000009830	POMT2	-	14:77741298-77797940	-	-	12.0923	2.90117	21.2834	OK	15.8317	2.6386	29.0247	OK	8.18529	1.93132	14.4393	OK	10.2482	2.7855	17.7108	OK
ENSG00000009844	-	-	ENSG00000009844	VTA1	-	6:142468366-142545826	-	-	18.4288	12.2923	24.5653	OK	17.1354	10.3884	23.8823	OK	17.8478	11.9025	23.793	OK	15.9072	10.0762	21.7381	OK
ENSG00000009950	-	-	ENSG00000009950	MLXIPL	-	7:73007523-73038873	-	-	0.0838957	0	1.36755	OK	0.248411	0	1.377	OK	0.226592	0	1.35398	OK	0.192759	0	1.31704	OK
ENSG00000009954	-	-	ENSG00000009954	BAZ1B	-	7:72854727-72936608	-	-	16.0104	11.1524	20.8684	OK	12.7619	9.78003	15.7437	OK	14.2027	9.45487	18.9505	OK	13.2591	9.19755	17.3207	OK
ENSG00000010017	-	-	ENSG00000010017	RANBP9	-	6:13615558-13711796	-	-	33.2593	20.9613	45.5573	OK	30.9067	20.0825	41.7308	OK	45.3212	27.976	62.6664	OK	31.1047	18.3284	43.8811	OK
ENSG00000010030	-	-	ENSG00000010030	ETV7	-	6:36322418-36458920	-	-	0.135402	0	1.01428	OK	0.05356	0	0.653956	OK	0.0329115	0	0.672966	OK	0.182348	0	1.14473	OK
ENSG00000010072	-	-	ENSG00000010072	SPRTN	-	1:231468479-231490769	-	-	5.12343	2.77385	7.473	OK	7.09583	3.68181	10.5098	OK	6.39881	3.40835	9.38927	OK	5.64909	2.74291	8.55528	OK
ENSG00000010165	-	-	ENSG00000010165	METTL13	-	1:171750787-171783163	-	-	6.001	1.99669	10.0053	OK	3.93184	1.40613	6.45754	OK	5.43839	2.64963	8.22715	OK	6.23097	2.38677	10.0752	OK
ENSG00000010219	-	-	ENSG00000010219	DYRK4	-	12:4671369-4960277	-	-	16.6806	6.22958	27.1316	OK	16.085	6.32231	25.8476	OK	26.3336	11.5793	41.0878	OK	19.795	10.0399	29.5502	OK
ENSG00000010244	-	-	ENSG00000010244	ZNF207	-	17:30593194-30708905	-	-	60.4904	38.7665	82.2143	OK	58.1996	37.5687	78.8305	OK	61.1233	42.5265	79.7201	OK	59.2612	38.6278	79.8946	OK
ENSG00000010256	-	-	ENSG00000010256	UQCRC1	-	3:48636434-48648409	-	-	44.4963	31.2602	57.7324	OK	36.4015	25.2802	47.5228	OK	52.7318	37.1564	68.3072	OK	44.087	31.346	56.828	OK
ENSG00000010270	-	-	ENSG00000010270	STARD3NL	-	7:38217823-38270272	-	-	28.4561	21.082	35.8301	OK	27.4664	20.3893	34.5435	OK	34.2625	25.1584	43.3666	OK	30.4269	22.3546	38.4992	OK
ENSG00000010278	-	-	ENSG00000010278	CD9	-	12:6308880-6347425	-	-	248.934	186.092	311.776	OK	339.967	254.702	425.232	OK	418.121	313.505	522.736	OK	404.034	296.287	511.781	OK
ENSG00000010282	-	-	ENSG00000010282	HHATL	-	3:42734154-42846023	-	-	0	0	0	OK	0	0	0	OK	0	0	0	OK	0	0	0	OK
ENSG00000010292	-	-	ENSG00000010292	NCAPD2	-	12:6601149-6641121	-	-	11.655	5.53433	17.7757	OK	8.45747	2.80006	14.1149	OK	11.0036	3.53572	18.4714	OK	8.0955	2.86003	13.331	OK
ENSG00000010295	-	-	ENSG00000010295	IFFO1	-	12:6647540-6665239	-	-	4.61487	3.01785	6.21188	OK	3.51723	2.26303	4.77143	OK	4.07869	2.58332	5.57406	OK	6.25648	4.26756	8.24539	OK
ENSG00000010310	-	-	ENSG00000010310	GIPR	-	19:46171501-46186982	-	-	0	0	0	OK	0.145188	0	2.71719	OK	0.181769	0	2.76129	OK	0.144061	0	2.72898	OK
ENSG00000010318	-	-	ENSG00000010318	PHF7	-	3:52444672-52457657	-	-	1.70537	0	3.51624	OK	2.00861	0	4.14139	OK	0.760084	0	2.45159	OK	1.49824	0	3.37024	OK
ENSG00000010319	-	-	ENSG00000010319	SEMA3G	-	3:52467068-52479101	-	-	8.27915	5.77831	10.78	OK	11.4624	6.88902	16.0358	OK	4.76574	2.90226	6.62923	OK	4.22515	2.48907	5.96123	OK
ENSG00000010322	-	-	ENSG00000010322	NISCH	-	3:52489133-52527087	-	-	18.0668	7.24297	28.8907	OK	16.9442	7.2179	26.6705	OK	18.5828	8.86658	28.299	OK	17.2469	6.48444	28.0093	OK
ENSG00000010327	-	-	ENSG00000010327	STAB1	-	3:52529353-52742182	-	-	25.3287	0.992458	49.6649	OK	27.7493	0.550651	54.9479	OK	30.9321	0	66.3501	OK	22.8778	0	48.0482	OK
ENSG00000010361	-	-	ENSG00000010361	FUZ	-	19:50270224-50320633	-	-	2.26008	0	6.11476	OK	2.31528	0	6.22135	OK	4.51603	0	11.913	OK	2.97309	0	7.59277	OK
ENSG00000010379	-	-	ENSG00000010379	SLC6A13	-	12:329788-372039	-	-	0	0	0	OK	0.191588	0	2.27272	OK	0	0	0	OK	0.0799654	0	2.13208	OK
ENSG00000010404	-	-	ENSG00000010404	IDS	-	X:148558520-148632055	-	-	16.899	9.15663	24.6413	OK	16.9135	10.0499	23.7771	OK	19.8687	11.108	28.6294	OK	12.5601	6.86432	18.256	OK
ENSG00000010438	-	-	ENSG00000010438	PRSS3	-	9:33750514-33920402	-	-	8.12674	0	21.9653	OK	8.01211	0	25.8534	OK	10.9762	0	29.0423	OK	10.1559	0	26.9906	OK
ENSG00000010539	-	-	ENSG00000010539	ZNF200	-	16:3238211-3286221	-	-	2.76543	0.843209	4.68765	OK	2.80772	0.654464	4.96097	OK	3.07757	1.09645	5.05869	OK	2.97172	0.892668	5.05076	OK
ENSG00000010610	-	-	ENSG00000010610	CD4	-	12:6896023-6929974	-	-	0	0	0	OK	0	0	0	OK	0.0811073	0	2.05362	OK	0.00809446	0	2.06249	OK
ENSG00000010626	-	-	ENSG00000010626	LRRC23	-	12:6976282-7032861	-	-	1.29107	0	4.52186	OK	1.40112	0	5.87588	OK	1.76842	0	7.01341	OK	1.75222	0	6.59891	OK
ENSG00000010671	-	-	ENSG00000010671	BTK	-	X:100604434-100641183	-	-	0	0	0	OK	0.0255758	0	2.19292	OK	0	0	0	OK	0.00947769	0	2.1641	OK
ENSG00000010704	-	-	ENSG00000010704	HFE	-	6:26087508-26098571	-	-	2.01774	0	4.13714	OK	1.83418	0	4.22811	OK	1.9588	0.157738	3.75987	OK	1.92277	0	3.98189	OK
ENSG00000010803	-	-	ENSG00000010803	SCMH1	-	1:41492871-41707826	-	-	15.3341	5.09349	25.5747	OK	9.64859	3.04329	16.2539	OK	11.566	2.6856	20.4463	OK	11.0255	2.72787	19.3232	OK
ENSG00000010810	-	-	ENSG00000010810	FYN	-	6:111981534-112194655	-	-	80.5615	44.6672	116.456	OK	75.6096	42.8531	108.366	OK	60.4121	37.7785	83.0457	OK	75.5864	48.2862	102.887	OK
ENSG00000010818	-	-	ENSG00000010818	HIVEP2	-	6:143069579-143266338	-	-	0.421879	0	2.50212	OK	2.2611	0	9.91354	OK	13.14	0	39.8051	OK	1.92965	0	4.00348	OK
ENSG00000010932	-	-	ENSG00000010932	FMO1	-	1:171216718-171255117	-	-	0	0	0	OK	0	0	0	OK	0.0106838	0	1.32155	OK	0	0	0	OK
ENSG00000011007	-	-	ENSG00000011007	TCEB3	-	1:24069644-24104777	-	-	9.9016	3.26274	16.5405	OK	9.4638	5.31629	13.6113	OK	13.2746	4.82075	21.7285	OK	12.0471	4.87766	19.2166	OK
ENSG00000011009	-	-	ENSG00000011009	LYPLA2	-	1:24117459-24122029	-	-	13.1658	7.75755	18.574	OK	9.95815	2.73309	17.1832	OK	13.6252	8.34864	18.9017	OK	19.4874	10.5417	28.4331	OK
ENSG00000011021	-	-	ENSG00000011021	CLCN6	-	1:11821843-11908402	-	-	4.76629	2.74459	6.78799	OK	5.2018	2.69665	7.70696	OK	7.2251	3.70897	10.7412	OK	5.53868	3.14538	7.93198	OK
ENSG00000011028	-	-	ENSG00000011028	MRC2	-	17:60704761-60770958	-	-	8.40605	4.8276	11.9845	OK	6.71313	3.11738	10.3089	OK	11.7319	7.34028	16.1235	OK	15.6938	10.9214	20.4661	OK
ENSG00000011052	-	-	ENSG00000011052	NME2	-	17:49230896-49249108	-	-	10.8798	0	24.7047	OK	9.84745	0	23.8569	OK	6.7792	0	21.1973	OK	8.04423	0	22.7019	OK
ENSG00000011083	-	-	ENSG00000011083	SLC6A7	-	5:149569519-149669854	-	-	0	0	0	OK	0	0	0	OK	0	0	0	OK	0	0	0	OK
ENSG00000011105	-	-	ENSG00000011105	TSPAN9	-	12:3186520-3395730	-	-	9.98919	6.69698	13.2814	OK	11.1077	3.86585	18.3496	OK	17.5563	2.64458	32.468	OK	12.5259	5.97898	19.0728	OK
ENSG00000011114	-	-	ENSG00000011114	BTBD7	-	14:93703895-93799438	-	-	11.4685	7.42295	15.514	OK	11.3813	7.70247	15.0601	OK	13.9605	9.64707	18.274	OK	8.2228	4.11863	12.327	OK
ENSG00000011132	-	-	ENSG00000011132	APBA3	-	19:3750816-3761697	-	-	2.22984	0	4.67728	OK	1.76738	0	3.9416	OK	3.86712	0.984161	6.75008	OK	3.73266	0.518012	6.94732	OK
ENSG00000011143	-	-	ENSG00000011143	MKS1	-	17:56282802-56345879	-	-	4.71391	0.773918	8.6539	OK	4.39423	1.37151	7.41695	OK	5.89031	1.41385	10.3668	OK	3.58379	0.600278	6.5673	OK
ENSG00000011198	-	-	ENSG00000011198	ABHD5	-	3:43328003-43775863	-	-	4.03405	0	10.0534	OK	4.08795	0	10.0188	OK	3.80546	0	9.52776	OK	3.27762	0	8.88387	OK
ENSG00000011201	-	-	ENSG00000011201	KAL1	-	X:8496914-8700227	-	-	0.0272371	0	0.698396	OK	0.0286084	0	0.690706	OK	0.00657263	0	0.676039	OK	0	0	0	OK
ENSG00000011243	-	-	ENSG00000011243	AKAP8L	-	19:15464195-15529952	-	-	17.5039	6.36153	28.6463	OK	18.8963	6.71784	31.0748	OK	17.6324	3.88602	31.3788	OK	18.2883	6.09712	30.4796	OK
ENSG00000011258	-	-	ENSG00000011258	MBTD1	-	17:49254785-49337524	-	-	5.528	3.47222	7.58377	OK	3.70225	2.05221	5.35228	OK	5.1938	2.94919	7.4384	OK	3.40994	1.80688	5.01301	OK
ENSG00000011260	-	-	ENSG00000011260	UTP18	-	17:49337888-49375297	-	-	15.0169	8.16833	21.8655	OK	17.115	8.36558	25.8643	OK	15.9052	8.42026	23.3902	OK	12.6926	7.54996	17.8353	OK
ENSG00000011275	-	-	ENSG00000011275	RNF216	-	7:5659677-5821370	-	-	10.3912	6.74664	14.0357	OK	9.60652	6.4058	12.8072	OK	12.9184	7.22302	18.6138	OK	10.567	6.80394	14.33	OK
ENSG00000011295	-	-	ENSG00000011295	TTC19	-	17:15879873-16256970	-	-	19.0354	6.23177	31.8391	OK	20.3294	6.77626	33.8825	OK	22.6397	11.0367	34.2426	OK	20.5961	8.1072	33.085	OK
ENSG00000011304	-	-	ENSG00000011304	PTBP1	-	19:797074-812327	-	-	91.657	61.7541	121.56	OK	106.978	64.4318	149.525	OK	104.047	68.4118	139.682	OK	98.5448	64.2007	132.889	OK
ENSG00000011332	-	-	ENSG00000011332	DPF1	-	19:38701645-38720354	-	-	1.38708	0	3.84936	OK	1.74492	0	4.3873	OK	0.660805	0	3.02404	OK	0.623945	0	3.14792	OK
ENSG00000011347	-	-	ENSG00000011347	SYT7	-	11:61282784-61348620	-	-	0.0817943	0	1.13859	OK	0.0244328	0	1.07911	OK	0.220111	0	1.15882	OK	0.0764589	0	0.994538	OK
ENSG00000011376	-	-	ENSG00000011376	LARS2	-	3:45429997-45590913	-	-	3.15731	1.38418	4.93045	OK	2.35112	0.769476	3.93276	OK	2.68528	0.827986	4.54257	OK	2.5756	0.447112	4.70409	OK
ENSG00000011405	-	-	ENSG00000011405	PIK3C2A	-	11:17095935-17229530	-	-	41.6822	0	130.405	OK	30.7678	0	92.0923	OK	30.2482	11.8765	48.62	OK	25.0024	0	70.8606	OK
ENSG00000011422	-	-	ENSG00000011422	PLAUR	-	19:44150246-44174699	-	-	21.8182	12.5144	31.1221	OK	33.6011	22.1511	45.0511	OK	55.8731	37.6311	74.115	OK	59.9725	42.9969	76.948	OK
ENSG00000011426	-	-	ENSG00000011426	ANLN	-	7:36363829-36493400	-	-	28.0541	16.7251	39.383	OK	26.7985	16.285	37.3121	OK	25.0808	13.835	36.3266	OK	19.5644	11.6802	27.4486	OK
ENSG00000011451	-	-	ENSG00000011451	WIZ	-	19:15532318-15560762	-	-	13.7821	9.64649	17.9176	OK	12.6597	8.53351	16.7859	OK	12.0963	8.36233	15.8303	OK	11.8826	8.12292	15.6422	OK
ENSG00000011454	-	-	ENSG00000011454	RABGAP1	-	9:125703111-125867145	-	-	16.7334	6.85991	26.6068	OK	13.4931	7.23874	19.7476	OK	14.1916	7.90557	20.4776	OK	10.9589	5.55802	16.3599	OK
ENSG00000011465	-	-	ENSG00000011465	DCN	-	12:91539024-91576900	-	-	0.469734	0	3.93762	OK	0.0745711	0	3.53504	OK	0.254488	0	3.74368	OK	0.337424	0	2.94918	OK
ENSG00000011478	-	-	ENSG00000011478	QPCTL	-	19:46190711-46207247	-	-	3.78425	0.107981	7.46051	OK	4.10015	0.713926	7.48637	OK	7.02155	2.29182	11.7513	OK	7.65415	1.81611	13.4922	OK
ENSG00000011485	-	-	ENSG00000011485	PPP5C	-	19:46850250-46896238	-	-	25.813	15.5317	36.0943	OK	22.3779	13.075	31.6808	OK	26.4645	13.4918	39.4371	OK	25.856	16.0489	35.663	OK
ENSG00000011523	-	-	ENSG00000011523	CEP68	-	2:65283499-65357240	-	-	9.00436	4.36496	13.6438	OK	5.94474	2.05918	9.83029	OK	5.7997	1.42549	10.1739	OK	5.64517	1.70497	9.58536	OK
ENSG00000011566	-	-	ENSG00000011566	MAP4K3	-	2:39476406-39945103	-	-	13.6281	0	33.7411	OK	10.7014	0	24.9697	OK	8.37722	0	17.4949	OK	7.31075	0	15.5525	OK
ENSG00000011590	-	-	ENSG00000011590	ZBTB32	-	19:36195428-36207940	-	-	0	0	0	OK	0.472006	0	2.08501	OK	1.66343	0	5.6213	OK	0.178214	0	1.4593	OK
ENSG00000011600	-	-	ENSG00000011600	TYROBP	-	19:36395302-36399197	-	-	0	0	0	OK	0	0	0	OK	0	0	0	OK	0	0	0	OK
ENSG00000011638	-	-	ENSG00000011638	TMEM159	-	16:20944432-21191937	-	-	9.35811	5.03442	13.6818	OK	6.32799	2.15623	10.4998	OK	4.89253	2.04307	7.742	OK	5.80957	2.05863	9.56051	OK
ENSG00000011677	-	-	ENSG00000011677	GABRA3	-	X:151307354-151619830	-	-	0	0	0	OK	0	0	0	OK	0	0	0	OK	0	0	0	OK
ENSG00000012048	-	-	ENSG00000012048	BRCA1	-	17:41196311-41277500	-	-	2.14017	0.370605	3.90973	OK	1.79077	0	3.67462	OK	1.98167	0	3.97936	OK	1.4661	0	3.18963	OK
ENSG00000012061	-	-	ENSG00000012061	ERCC1	-	19:45882891-45982086	-	-	33.0194	18.1297	47.9091	OK	26.9713	10.3383	43.6042	OK	29.4551	13.0891	45.8212	OK	21.9077	8.82879	34.9867	OK
ENSG00000012124	-	-	ENSG00000012124	CD22	-	19:35810163-35838258	-	-	0.405969	0	5.19811	OK	0.438188	0	3.42287	OK	0	0	0	OK	0	0	0	OK
ENSG00000012171	-	-	ENSG00000012171	SEMA3B	-	3:50304989-50314977	-	-	0	0	0	OK	0.421616	0	1.90668	OK	0.615017	0	1.93946	OK	0.447075	0	1.93447	OK
ENSG00000012174	-	-	ENSG00000012174	MBTPS2	-	X:21857753-21903542	-	-	4.97489	3.32774	6.62205	OK	4.78778	3.25772	6.31785	OK	4.19685	2.76806	5.62564	OK	4.64745	3.11882	6.17609	OK
ENSG00000012211	-	-	ENSG00000012211	PRICKLE3	-	X:49028272-49042845	-	-	3.30507	0.677204	5.93294	OK	3.00445	0.217961	5.79095	OK	3.84379	0.800516	6.88707	OK	3.23531	0.64442	5.8262	OK
ENSG00000012223	-	-	ENSG00000012223	LTF	-	3:46477135-46526724	-	-	0	0	0	OK	0	0	0	OK	0	0	0	OK	0	0	0	OK
ENSG00000012232	-	-	ENSG00000012232	EXTL3	-	8:28457985-28613116	-	-	19.6294	9.9423	29.3165	OK	19.2048	9.7838	28.6259	OK	24.2863	14.5509	34.0217	OK	22.6264	11.9426	33.3102	OK
ENSG00000012504	-	-	ENSG00000012504	NR1H4	-	12:100867485-100958191	-	-	0	0	0	OK	0	0	0	OK	0	0	0	OK	0	0	0	OK
ENSG00000012660	-	-	ENSG00000012660	ELOVL5	-	6:53132195-53213947	-	-	68.1959	50.9061	85.4857	OK	83.9189	63.3376	104.5	OK	105.181	79.1558	131.207	OK	83.2856	62.3632	104.208	OK
ENSG00000012779	-	-	ENSG00000012779	ALOX5	-	10:45869660-45948569	-	-	0	0	0	OK	0	0	0	OK	0	0	0	OK	0	0	0	OK
ENSG00000012817	-	-	ENSG00000012817	KDM5D	-	Y:21865750-21906825	-	-	0	0	0	OK	0	0	0	OK	0	0	0	OK	0.00585268	0	0.866464	OK
ENSG00000012822	-	-	ENSG00000012822	CALCOCO1	-	12:54104902-54121529	-	-	33.8896	21.9153	45.8638	OK	33.2103	19.3167	47.1038	OK	33.0428	19.7179	46.3677	OK	28.2251	18.0693	38.3808	OK
ENSG00000012963	-	-	ENSG00000012963	UBR7	-	14:93651295-93695561	-	-	7.4436	3.13872	11.7485	OK	5.95062	3.18026	8.72098	OK	9.45611	3.39936	15.5129	OK	5.53002	2.95113	8.10891	OK
ENSG00000012983	-	-	ENSG00000012983	MAP4K5	-	14:50885218-51135049	-	-	26.1351	7.96074	44.3096	OK	23.0168	10.3465	35.6871	OK	33.7099	1.69856	65.7213	OK	23.9005	4.54636	43.2547	OK
ENSG00000013016	-	-	ENSG00000013016	EHD3	-	2:31456879-31492313	-	-	0.735498	0.309148	1.16185	OK	0.935969	0.483277	1.38866	OK	3.56634	2.27919	4.8535	OK	14.8297	10.926	18.7334	OK
ENSG00000013275	-	-	ENSG00000013275	PSMC4	-	19:40476911-40487348	-	-	41.9816	31.2054	52.7578	OK	44.864	33.1143	56.6136	OK	47.2864	34.9744	59.5984	OK	47.9906	35.7582	60.223	OK
ENSG00000013288	-	-	ENSG00000013288	MAN2B2	-	4:6576901-6625089	-	-	9.93744	6.57584	13.299	OK	9.21005	5.96722	12.4529	OK	9.72338	5.29088	14.1559	OK	11.4296	0.230965	22.6282	OK
ENSG00000013293	-	-	ENSG00000013293	SLC7A14	-	3:170136652-170578169	-	-	0.948488	0	4.80446	OK	0.291856	0	2.25593	OK	1.12173	0	6.93298	OK	0.874832	0	4.79784	OK
ENSG00000013297	-	-	ENSG00000013297	CLDN11	-	3:170136652-170578169	-	-	140.742	106.115	175.37	OK	157.134	118.926	195.342	OK	98.0823	72.1567	124.008	OK	52.4397	37.9216	66.9579	OK
ENSG00000013306	-	-	ENSG00000013306	SLC25A39	-	17:42396992-42402238	-	-	28.6255	19.3996	37.8514	OK	23.0905	15.3789	30.8022	OK	29.9227	20.4884	39.357	OK	30.2234	20.424	40.0228	OK
ENSG00000013364	-	-	ENSG00000013364	MVP	-	16:29817426-29859355	-	-	24.5964	8.12729	41.0655	OK	17.8468	4.89281	30.8008	OK	29.6467	0	64.56	OK	23.5068	8.22492	38.7886	OK
ENSG00000013374	-	-	ENSG00000013374	NUB1	-	7:151038784-151110440	-	-	35.9874	23.2496	48.7252	OK	28.0734	19.1689	36.9778	OK	27.4231	19.0683	35.7779	OK	21.7714	13.8207	29.7222	OK
ENSG00000013375	-	-	ENSG00000013375	PGM3	-	6:83777384-83908651	-	-	26.7564	11.1376	42.3752	OK	37.2197	0	83.5089	OK	34.3411	8.83106	59.8511	OK	22.9344	0	50.3768	OK
ENSG00000013392	-	-	ENSG00000013392	RWDD2A	-	6:83777384-83908651	-	-	4.35348	1.05012	7.65684	OK	3.83159	0.597385	7.06579	OK	5.12994	0.0933468	10.1665	OK	3.89502	0.532539	7.25749	OK
ENSG00000013441	-	-	ENSG00000013441	CLK1	-	2:201717731-201729422	-	-	24.3459	13.9472	34.7446	OK	57.8326	37.7194	77.9458	OK	44.2397	28.0704	60.409	OK	39.9149	21.1089	58.7209	OK
ENSG00000013503	-	-	ENSG00000013503	POLR3B	-	12:106751435-107283090	-	-	1.9555	0.592917	3.31809	OK	2.39831	0.742507	4.05412	OK	3.01867	0.778407	5.25893	OK	2.07588	0.905533	3.24624	OK
ENSG00000013523	-	-	ENSG00000013523	ANGEL1	-	14:77253587-77292589	-	-	4.69143	1.45265	7.93021	OK	5.27428	2.49474	8.05382	OK	4.27982	1.99985	6.5598	OK	5.31899	2.76158	7.87641	OK
ENSG00000013561	-	-	ENSG00000013561	RNF14	-	5:141323149-141369856	-	-	13.0554	7.15266	18.9581	OK	15.5927	8.71037	22.475	OK	13.2994	6.95058	19.6482	OK	15.54	6.73211	24.3479	OK
ENSG00000013563	-	-	ENSG00000013563	DNASE1L1	-	X:153618314-153650065	-	-	26.2724	0	75.7477	OK	17.4751	0	44.6342	OK	25.346	0	70.2563	OK	14.1074	0	31.1158	OK
ENSG00000013573	-	-	ENSG00000013573	DDX11	-	12:31173696-31257725	-	-	5.21001	0	10.5836	OK	2.71866	0	6.05572	OK	4.21854	0	8.90899	OK	3.43271	0	7.82652	OK
ENSG00000013583	-	-	ENSG00000013583	HEBP1	-	12:13080659-13193613	-	-	23.5922	13.6412	33.5432	OK	13.5477	7.22141	19.874	OK	15.1095	7.86422	22.3547	OK	16.8259	9.09313	24.5587	OK
ENSG00000013588	-	-	ENSG00000013588	GPRC5A	-	12:13043715-13070871	-	-	4.84056	2.34582	7.3353	OK	6.48272	1.83582	11.1296	OK	4.78403	0.966165	8.60189	OK	1.60457	0.115702	3.09344	OK
ENSG00000013619	-	-	ENSG00000013619	MAMLD1	-	X:149529688-149682448	-	-	2.17042	0.707251	3.63359	OK	2.12357	0.852753	3.39439	OK	2.02765	0.810791	3.2445	OK	2.33599	0.92054	3.75145	OK
ENSG00000013725	-	-	ENSG00000013725	CD6	-	11:60739114-60787849	-	-	0	0	0	OK	0	0	0	OK	0	0	0	OK	0	0	0	OK
ENSG00000013810	-	-	ENSG00000013810	TACC3	-	4:1723226-1746898	-	-	19.0264	10.7573	27.2955	OK	11.2427	7.45603	15.0293	OK	15.3985	10.1373	20.6597	OK	10.9238	7.2922	14.5554	OK
ENSG00000014123	-	-	ENSG00000014123	UFL1	-	6:96806249-97003152	-	-	5.73857	3.77301	7.70414	OK	6.4921	4.40373	8.58046	OK	10.2001	6.26096	14.1393	OK	7.27816	5.01657	9.53975	OK
ENSG00000014138	-	-	ENSG00000014138	POLA2	-	11:65029232-65073060	-	-	4.34081	1.31778	7.36385	OK	3.48229	1.20115	5.76343	OK	4.36844	0.677337	8.05955	OK	2.99979	0.782999	5.21657	OK
ENSG00000014164	-	-	ENSG00000014164	ZC3H3	-	8:144519824-144623623	-	-	3.19312	1.71082	4.67542	OK	3.31305	1.7953	4.8308	OK	3.50278	1.8873	5.11825	OK	3.17235	1.67319	4.67151	OK
ENSG00000014216	-	-	ENSG00000014216	CAPN1	-	11:64945076-64979477	-	-	65.6099	46.4566	84.7632	OK	48.3868	33.6059	63.1677	OK	53.8012	34.4846	73.1178	OK	57.3809	39.7886	74.9732	OK
ENSG00000014257	-	-	ENSG00000014257	ACPP	-	3:132036210-132087142	-	-	0	0	0	OK	0	0	0	OK	0.0279683	0	1.83339	OK	0.016876	0	1.82313	OK
ENSG00000014641	-	-	ENSG00000014641	MDH1	-	2:63348517-64054977	-	-	27.1982	15.8017	38.5946	OK	30.2248	15.2622	45.1875	OK	31.183	18.8642	43.5019	OK	29.2914	19.5241	39.0587	OK
ENSG00000014824	-	-	ENSG00000014824	SLC30A9	-	4:41992488-42092474	-	-	17.2716	11.1326	23.4105	OK	17.6818	11.949	23.4146	OK	17.7925	12.1589	23.4261	OK	15.2205	9.79325	20.6478	OK
ENSG00000014914	-	-	ENSG00000014914	MTMR11	-	1:149900542-149908791	-	-	6.57684	3.10089	10.0528	OK	5.39174	1.90516	8.87832	OK	5.20417	1.78491	8.62343	OK	4.45882	1.79599	7.12165	OK
ENSG00000014919	-	-	ENSG00000014919	COX15	-	10:101419262-101515891	-	-	9.03611	5.33688	12.7353	OK	6.08301	3.27917	8.88685	OK	9.31277	4.46945	14.1561	OK	8.39129	3.60418	13.1784	OK
ENSG00000015133	-	-	ENSG00000015133	CCDC88C	-	14:91737666-91884188	-	-	12.7273	6.26295	19.1916	OK	11.5137	5.74808	17.2793	OK	11.1577	4.69	17.6253	OK	11.1014	5.1316	17.0712	OK
ENSG00000015153	-	-	ENSG00000015153	YAF2	-	12:42550905-42632151	-	-	12.7946	5.27103	20.3182	OK	16.5688	6.09931	27.0384	OK	12.7619	4.2962	21.2276	OK	14.4391	5.3826	23.4957	OK
ENSG00000015171	-	-	ENSG00000015171	ZMYND11	-	10:180404-300577	-	-	19.4558	14.2322	24.6793	OK	22.7232	17.2144	28.2321	OK	18.6224	13.9537	23.2912	OK	15.8299	11.7659	19.8939	OK
ENSG00000015285	-	-	ENSG00000015285	WAS	-	X:48534984-48549818	-	-	0.211059	0	2.42098	OK	0	0	0	OK	0	0	0	OK	0.0580837	0	2.19873	OK
ENSG00000015413	-	-	ENSG00000015413	DPEP1	-	16:89679715-89704839	-	-	0	0	0	OK	0.120692	0	1.98064	OK	0	0	0	OK	0.161318	0	2.07375	OK
ENSG00000015475	-	-	ENSG00000015475	BID	-	22:18216905-18257536	-	-	13.9762	9.14332	18.809	OK	9.71141	5.02813	14.3947	OK	12.9526	7.9906	17.9145	OK	12.0862	7.6664	16.5061	OK
ENSG00000015479	-	-	ENSG00000015479	MATR3	-	5:138282408-138667360	-	-	81.6285	44.1122	119.145	OK	76.6963	40.7003	112.692	OK	75.5516	37.9583	113.145	OK	66.7328	35.038	98.4276	OK
ENSG00000015520	-	-	ENSG00000015520	NPC1L1	-	7:44552133-44580914	-	-	0	0	0	OK	0	0	0	OK	0	0	0	OK	0	0	0	OK
ENSG00000015532	-	-	ENSG00000015532	XYLT2	-	17:48423452-48440499	-	-	4.02662	0.917627	7.13561	OK	7.96332	3.17126	12.7554	OK	4.83893	0	9.89331	OK	7.7208	2.62798	12.8136	OK
ENSG00000015568	-	-	ENSG00000015568	RGPD5	-	2:110550334-110615272	-	-	0.496116	0	3.23449	OK	0.799628	0	3.3419	OK	0.46491	0	2.87142	OK	0.573852	0	3.02595	OK
ENSG00000015592	-	-	ENSG00000015592	STMN4	-	8:27092839-27115937	-	-	0	0	0	OK	0	0	0	OK	0	0	0	OK	0	0	0	OK
ENSG00000015676	-	-	ENSG00000015676	NUDCD3	-	7:44418719-44530479	-	-	28.8268	15.4449	42.2087	OK	17.5858	8.34729	26.8243	OK	20.1147	8.8727	31.3566	OK	18.8952	9.80157	27.9888	OK
ENSG00000016082	-	-	ENSG00000016082	ISL1	-	5:50668569-50690564	-	-	0.0704108	0	0.559301	OK	0.278258	0	0.825832	OK	0.556872	0	1.28226	OK	0.202541	0	0.78018	OK
ENSG00000016391	-	-	ENSG00000016391	CHDH	-	3:53528682-53880417	-	-	0.0207662	0	0.86189	OK	0.0198928	0	0.838	OK	0.0200049	0	0.858866	OK	0.0348001	0	0.850201	OK
ENSG00000016402	-	-	ENSG00000016402	IL20RA	-	6:137321107-137366298	-	-	0	0	0	OK	0	0	0	OK	0	0	0	OK	0	0	0	OK
ENSG00000016490	-	-	ENSG00000016490	CLCA1	-	1:86934050-86965972	-	-	0	0	0	OK	0	0	0	OK	0	0	0	OK	0	0	0	OK
ENSG00000016602	-	-	ENSG00000016602	CLCA4	-	1:87012760-87158886	-	-	0	0	0	OK	0	0	0	OK	0	0	0	OK	0.0149968	0	0.763341	OK
ENSG00000016864	-	-	ENSG00000016864	GLT8D1	-	3:52529353-52742182	-	-	32.1255	0	66.8075	OK	24.8547	0	53.6191	OK	33.6779	0	71.9765	OK	41.1095	2.90135	79.3177	OK
ENSG00000017260	-	-	ENSG00000017260	ATP2C1	-	3:130569438-131100319	-	-	19.9574	11.618	28.2969	OK	21.8634	13.9713	29.7556	OK	21.2596	13.1267	29.3926	OK	21.4499	12.4448	30.455	OK
ENSG00000017373	-	-	ENSG00000017373	SRCIN1	-	17:36686250-36762183	-	-	0.125244	0	1.21222	OK	0.0470314	0	1.12493	OK	0.0721614	0	1.14765	OK	0.118574	0	1.23345	OK
ENSG00000017427	-	-	ENSG00000017427	IGF1	-	12:102789644-102874423	-	-	0	0	0	OK	0.320372	0	2.24531	OK	0.795476	0	2.80704	OK	0.504034	0	2.33993	OK
ENSG00000017483	-	-	ENSG00000017483	SLC38A5	-	X:48316919-48328644	-	-	3.21068	0	6.92252	OK	3.17819	0	6.44886	OK	2.78241	0	6.43817	OK	5.37052	1.09844	9.64261	OK
ENSG00000017621	-	-	ENSG00000017621	MAGIX	-	X:49019060-49024822	-	-	0.29491	0	1.57478	OK	0.0136422	0	1.38862	OK	0.17635	0	1.43516	OK	0.281977	0	2.0403	OK
ENSG00000017797	-	-	ENSG00000017797	RALBP1	-	18:9475006-9538114	-	-	36.1873	25.8902	46.4843	OK	34.8751	25.8593	43.8909	OK	28.4048	21.4734	35.3362	OK	33.1696	23.9284	42.4108	OK
ENSG00000018189	-	-	ENSG00000018189	RUFY3	-	4:71569463-71673032	-	-	22.0402	10.2566	33.8238	OK	17.5091	4.98051	30.0377	OK	13.745	4.22083	23.2691	OK	11.4099	4.69602	18.1238	OK
ENSG00000018236	-	-	ENSG00000018236	CNTN1	-	12:41086243-41466220	-	-	0	0	0	OK	0	0	0	OK	0.927438	0	3.4251	OK	0	0	0	OK
ENSG00000018280	-	-	ENSG00000018280	SLC11A1	-	2:219246751-219261617	-	-	0.232691	0	2.69625	OK	0.6102	0	3.14138	OK	0.409134	0	2.87469	OK	0.133635	0	2.57767	OK
ENSG00000018408	-	-	ENSG00000018408	WWTR1	-	3:149235021-149454501	-	-	103.692	75.2871	132.096	OK	112.755	83.1494	142.361	OK	159.198	116.671	201.726	OK	133.567	100.073	167.06	OK
ENSG00000018510	-	-	ENSG00000018510	AGPS	-	2:178092322-178408564	-	-	19.4701	13.4807	25.4594	OK	24.8586	9.59464	40.1225	OK	21.1602	7.65761	34.6628	OK	14.4053	8.92112	19.8895	OK
ENSG00000018607	-	-	ENSG00000018607	ZNF806	-	2:133066881-133076309	-	-	0	0	0	OK	0	0	0	OK	0	0	0	OK	0	0	0	OK
ENSG00000018610	-	-	ENSG00000018610	CXorf56	-	X:118672111-118699397	-	-	7.25561	4.75071	9.7605	OK	4.76556	3.08644	6.44469	OK	5.83652	3.94181	7.73122	OK	5.34813	3.60422	7.09204	OK
ENSG00000018625	-	-	ENSG00000018625	ATP1A2	-	1:160085548-160113381	-	-	0.0587618	0	1.50122	OK	0	0	0	OK	0.243581	0	1.70612	OK	0	0	0	OK
ENSG00000018699	-	-	ENSG00000018699	TTC27	-	2:32853098-33046118	-	-	6.50292	2.58817	10.4177	OK	6.27721	1.76536	10.7891	OK	11.6221	1.5938	21.6503	OK	5.41139	1.03463	9.78815	OK
ENSG00000018869	-	-	ENSG00000018869	ZNF582	-	19:56732680-56904914	-	-	0.727671	0	2.37306	OK	0.497967	0	1.8586	OK	0.623981	0	2.53795	OK	0.701903	0	2.50626	OK
ENSG00000019102	-	-	ENSG00000019102	VSIG2	-	11:124617367-124635832	-	-	1.39174	0	3.80396	OK	0.552025	0	1.88174	OK	1.97881	0	5.58335	OK	1.01918	0	3.16653	OK
ENSG00000019144	-	-	ENSG00000019144	PHLDB1	-	11:118477154-118550399	-	-	15.5108	8.2596	22.7621	OK	30.8378	18.1105	43.565	OK	38.9731	23.3894	54.5568	OK	30.0533	16.3046	43.8019	OK
ENSG00000019169	-	-	ENSG00000019169	MARCO	-	2:119699741-119752236	-	-	0	0	0	OK	0	0	0	OK	0	0	0	OK	0	0	0	OK
ENSG00000019186	-	-	ENSG00000019186	CYP24A1	-	20:52769987-52790512	-	-	0	0	0	OK	0	0	0	OK	0	0	0	OK	0	0	0	OK
ENSG00000019485	-	-	ENSG00000019485	PRDM11	-	11:45115563-45256843	-	-	0.671122	0	1.54614	OK	0.637961	0	1.47639	OK	1.29622	0.0919702	2.50046	OK	0.78984	0	1.7099	OK
ENSG00000019505	-	-	ENSG00000019505	SYT13	-	11:45261851-45307870	-	-	0	0	0	OK	0.0113377	0	0.663848	OK	0.00719623	0	0.659711	OK	0	0	0	OK
ENSG00000019549	-	-	ENSG00000019549	SNAI2	-	8:49830248-49834299	-	-	0.369942	0	0.74373	OK	0.567864	0.108034	1.02769	OK	0.614839	0.130075	1.0996	OK	1.15399	0.447136	1.86084	OK
ENSG00000019582	-	-	ENSG00000019582	CD74	-	5:149781199-149792492	-	-	0.850459	0	2.58602	OK	0.182062	0	2.15655	OK	0.180281	0	1.75167	OK	0.806457	0	2.71589	OK
ENSG00000019991	-	-	ENSG00000019991	HGF	-	7:81328321-81399754	-	-	0	0	0	OK	0	0	0	OK	0.0260159	0	1.40367	OK	0	0	0	OK
ENSG00000019995	-	-	ENSG00000019995	ZRANB1	-	10:126605711-126849739	-	-	7.39861	4.31299	10.4842	OK	6.95983	2.6395	11.2802	OK	6.80594	3.43704	10.1748	OK	6.91006	2.57801	11.2421	OK
ENSG00000020129	-	-	ENSG00000020129	NCDN	-	1:35899090-36032875	-	-	3.25992	0.426836	6.093	OK	2.15183	0.239719	4.06393	OK	3.49725	0.912176	6.08233	OK	4.24123	0.986238	7.49622	OK
ENSG00000020181	-	-	ENSG00000020181	GPR124	-	8:37641708-37707422	-	-	8.10715	4.5355	11.6788	OK	6.54428	4.0991	8.98947	OK	6.13313	3.69134	8.57492	OK	6.40486	3.60958	9.20015	OK
ENSG00000020219	-	-	ENSG00000020219	CCT8L1P	-	7:152142561-152144235	-	-	0	0	0	OK	0	0	0	OK	0	0	0	OK	0	0	0	OK
ENSG00000020256	-	-	ENSG00000020256	ZFP64	-	20:50668201-50820847	-	-	11.2579	5.62956	16.8863	OK	7.71435	4.46918	10.9595	OK	9.13576	5.61773	12.6538	OK	10.1879	6.27016	14.1056	OK
ENSG00000020426	-	-	ENSG00000020426	MNAT1	-	14:61201459-61550451	-	-	47.1137	11.0672	83.1601	OK	38.5123	10.7406	66.284	OK	40.4584	20.1633	60.7534	OK	48.9869	11.8867	86.0872	OK
ENSG00000020577	-	-	ENSG00000020577	SAMD4A	-	14:55033814-55260033	-	-	11.8377	6.71736	16.9581	OK	16.9762	10.374	23.5783	OK	17.7054	10.4323	24.9785	OK	9.10206	5.61259	12.5915	OK
ENSG00000020633	-	-	ENSG00000020633	RUNX3	-	1:25226001-25291612	-	-	0	0	0	OK	0	0	0	OK	0	0	0	OK	0	0	0	OK
ENSG00000020922	-	-	ENSG00000020922	MRE11A	-	11:94152894-94232749	-	-	8.92037	0	24.3595	OK	8.08151	0	26.2838	OK	6.81001	0	18.7977	OK	5.40042	0	15.2756	OK
ENSG00000021300	-	-	ENSG00000021300	PLEKHB1	-	11:73357222-73373864	-	-	1.37209	0	4.26534	OK	0.777477	0	3.91876	OK	0.283588	0	2.78889	OK	0.964428	0	4.02692	OK
ENSG00000021355	-	-	ENSG00000021355	SERPINB1	-	6:2832565-2842240	-	-	13.4704	8.74291	18.1978	OK	15.2072	7.26822	23.1461	OK	15.9421	9.19566	22.6886	OK	18.2686	11.136	25.4012	OK
ENSG00000021461	-	-	ENSG00000021461	CYP3A43	-	7:99425635-99463718	-	-	0.231378	0	2.02835	OK	0.0267003	0	2.22943	OK	0.26792	0	2.05939	OK	0.110734	0	1.85848	OK
ENSG00000021488	-	-	ENSG00000021488	SLC7A9	-	19:33321414-33360672	-	-	0.509295	0	1.44944	OK	0.126011	0	0.961976	OK	0.193142	0	0.916015	OK	0.223305	0	1.08899	OK
ENSG00000021574	-	-	ENSG00000021574	SPAST	-	2:32288679-32382706	-	-	7.27823	5.30317	9.2533	OK	7.23291	5.2846	9.18122	OK	8.67183	6.41983	10.9238	OK	6.59277	4.79086	8.39468	OK
ENSG00000021645	-	-	ENSG00000021645	NRXN3	-	14:78708733-80330762	-	-	0.890979	0	2.64879	OK	0.974991	0	2.70594	OK	1.29004	0	3.06311	OK	0.924266	0	2.66588	OK
ENSG00000021762	-	-	ENSG00000021762	OSBPL5	-	11:3108345-3187969	-	-	5.31851	1.53056	9.10646	OK	5.07573	1.7726	8.37886	OK	4.26772	1.15936	7.37607	OK	7.08105	1.55699	12.6051	OK
ENSG00000021776	-	-	ENSG00000021776	AQR	-	15:35147731-35262040	-	-	14.7058	9.58895	19.8227	OK	14.4993	8.47845	20.5201	OK	13.5073	8.98095	18.0336	OK	13.745	8.2667	19.2233	OK
ENSG00000021826	-	-	ENSG00000021826	CPS1	-	2:211342405-211543831	-	-	0.0309978	0	2.22398	OK	0.108587	0	2.11023	OK	0.0787013	0	2.27824	OK	0.137641	0	1.97154	OK
ENSG00000021852	-	-	ENSG00000021852	C8B	-	1:57394882-59012474	-	-	0	0	0	OK	0	0	0	OK	0	0	0	OK	0	0	0	OK
ENSG00000022267	-	-	ENSG00000022267	FHL1	-	X:135229558-135293518	-	-	19.3434	13.8105	24.8762	OK	21.0713	15.1342	27.0083	OK	27.111	20.0218	34.2001	OK	29.5614	21.8297	37.293	OK
ENSG00000022277	-	-	ENSG00000022277	RTFDC1	-	20:55043646-55101198	-	-	38.3319	27.3178	49.346	OK	33.8044	23.255	44.3538	OK	39.2731	25.0413	53.5049	OK	39.8151	29.2914	50.3388	OK
ENSG00000022355	-	-	ENSG00000022355	GABRA1	-	5:161274196-161326975	-	-	0	0	0	OK	0	0	0	OK	0	0	0	OK	0	0	0	OK
ENSG00000022556	-	-	ENSG00000022556	NLRP2	-	19:55434876-55512510	-	-	5.88362	1.50332	10.2639	OK	4.47177	1.43874	7.5048	OK	5.25321	0	10.8682	OK	6.32857	2.80748	9.84966	OK
ENSG00000022567	-	-	ENSG00000022567	SLC45A4	-	8:142217264-142318404	-	-	0.180029	0	1.12416	OK	0.848416	0	2.14951	OK	1.66862	0	3.94168	OK	0.454259	0	1.86951	OK
ENSG00000022840	-	-	ENSG00000022840	RNF10	-	12:120941076-121015397	-	-	49.0379	25.6396	72.4362	OK	34.6753	16.2303	53.1202	OK	45.2224	21.6332	68.8116	OK	42.9784	21.739	64.2178	OK
ENSG00000022976	-	-	ENSG00000022976	ZNF839	-	14:102783713-102829253	-	-	2.34377	0.774109	3.91342	OK	3.1727	1.03081	5.31458	OK	3.72336	0.242954	7.20377	OK	2.99479	0.947884	5.0417	OK
ENSG00000023041	-	-	ENSG00000023041	ZDHHC6	-	10:114190057-114206672	-	-	17.3245	11.4663	23.1827	OK	19.8517	10.5637	29.1397	OK	19.0044	11.3888	26.6201	OK	17.059	9.16617	24.9518	OK
ENSG00000023171	-	-	ENSG00000023171	GRAMD1B	-	11:123396343-123498482	-	-	0.986129	0.438827	1.53343	OK	1.22584	0.382627	2.06905	OK	1.31299	0.606136	2.01985	OK	0.88703	0.337115	1.43694	OK
ENSG00000023191	-	-	ENSG00000023191	RNH1	-	11:494511-507300	-	-	63.2638	46.1344	80.3933	OK	44.0697	31.4502	56.6892	OK	60.5448	44.1919	76.8977	OK	65.1722	47.1635	83.181	OK
ENSG00000023228	-	-	ENSG00000023228	NDUFS1	-	2:206979540-207027652	-	-	25.6506	7.57844	43.7228	OK	20.5628	9.16704	31.9586	OK	24.5887	11.5237	37.6536	OK	23.2837	6.60906	39.9583	OK
ENSG00000023287	-	-	ENSG00000023287	RB1CC1	-	8:53535015-53658403	-	-	14.8996	4.40995	25.3892	OK	13.3118	8.01484	18.6087	OK	13.9417	5.21163	22.6718	OK	14.1361	2.41495	25.8573	OK
ENSG00000023318	-	-	ENSG00000023318	ERP44	-	9:102741460-102861322	-	-	14.7561	11.187	18.3251	OK	17.1988	13.0522	21.3453	OK	24.8104	18.9948	30.6261	OK	26.5131	20.2967	32.7295	OK
ENSG00000023330	-	-	ENSG00000023330	ALAS1	-	3:52232101-52248343	-	-	8.72095	3.38961	14.0523	OK	12.1792	8.34052	16.018	OK	11.339	7.77378	14.9042	OK	12.8319	8.84451	16.8192	OK
ENSG00000023445	-	-	ENSG00000023445	BIRC3	-	11:102188214-102210134	-	-	1.44173	0	4.08239	OK	11.2781	3.35718	19.199	OK	2.00911	0	4.45234	OK	0.45415	0	2.02932	OK
ENSG00000023516	-	-	ENSG00000023516	AKAP11	-	13:42846288-42897396	-	-	2.99495	2.19972	3.79017	OK	2.92888	2.15067	3.70708	OK	3.73244	2.76811	4.69678	OK	2.71692	1.97872	3.45512	OK
ENSG00000023572	-	-	ENSG00000023572	GLRX2	-	1:193065597-193075244	-	-	12.7087	6.50156	18.9159	OK	13.8807	7.37521	20.3862	OK	17.505	9.81745	25.1926	OK	17.4751	9.85579	25.0943	OK
ENSG00000023608	-	-	ENSG00000023608	SNAPC1	-	14:62147758-62263146	-	-	3.52636	0	8.31052	OK	7.11805	0	15.1009	OK	7.09757	0	15.366	OK	4.72974	0	9.77674	OK
ENSG00000023697	-	-	ENSG00000023697	DERA	-	12:16064105-16190220	-	-	19.9987	13.3356	26.6618	OK	20.726	14.1085	27.3435	OK	19.7522	13.7498	25.7545	OK	21.0365	14.9414	27.1316	OK
ENSG00000023734	-	-	ENSG00000023734	STRAP	-	12:16035324-16056412	-	-	73.3659	50.4442	96.2875	OK	74.7257	49.0446	100.407	OK	73.3443	52.3208	94.3679	OK	63.4023	44.6617	82.1428	OK
ENSG00000023839	-	-	ENSG00000023839	ABCC2	-	10:101542488-101611949	-	-	1.0721	0	2.37575	OK	0.48009	0	1.38423	OK	0.845981	0	2.08611	OK	1.08861	0	3.92373	OK
ENSG00000023892	-	-	ENSG00000023892	DEF6	-	6:35265594-35289548	-	-	0.143556	0	1.34615	OK	0.129061	0	1.36053	OK	0	0	0	OK	0.110621	0	1.3119	OK
ENSG00000023902	-	-	ENSG00000023902	PLEKHO1	-	1:150121372-150136916	-	-	36.251	23.4934	49.0086	OK	31.2344	21.2622	41.2066	OK	55.6769	38.4576	72.8962	OK	68.7622	46.9174	90.6071	OK
ENSG00000023909	-	-	ENSG00000023909	GCLM	-	1:94350760-94374966	-	-	15.6865	11.1338	20.2393	OK	17.6968	13.1825	22.2111	OK	21.6404	16.2268	27.0539	OK	12.2989	8.93597	15.6619	OK
ENSG00000024048	-	-	ENSG00000024048	UBR2	-	6:42531799-42661242	-	-	4.74466	3.30236	6.18695	OK	4.8452	3.49863	6.19177	OK	5.2458	3.77435	6.71726	OK	4.1836	3.02703	5.34016	OK
ENSG00000024422	-	-	ENSG00000024422	EHD2	-	19:48110780-48246391	-	-	227.863	172.588	283.138	OK	203.09	152.228	253.952	OK	216.491	160.173	272.808	OK	192.723	143.901	241.544	OK
ENSG00000024526	-	-	ENSG00000024526	DEPDC1	-	1:68939834-69004310	-	-	5.78319	4.03576	7.53062	OK	5.3592	3.5215	7.19689	OK	7.23802	4.82696	9.64908	OK	3.99581	2.65445	5.33717	OK
ENSG00000024862	-	-	ENSG00000024862	CCDC28A	-	6:139094656-139114456	-	-	3.05806	1.57298	4.54313	OK	3.33281	1.82732	4.83829	OK	4.15897	2.33343	5.98451	OK	4.20825	2.40197	6.01452	OK
ENSG00000025039	-	-	ENSG00000025039	RRAGD	-	6:90074354-90121989	-	-	0	0	0	OK	0.226317	0	0.828192	OK	0.104007	0	0.528839	OK	0.0611782	0	0.467958	OK
ENSG00000025156	-	-	ENSG00000025156	HSF2	-	6:122720690-122754264	-	-	5.09134	2.65585	7.52682	OK	3.86939	2.44523	5.29355	OK	3.40194	2.01848	4.7854	OK	4.14062	2.47941	5.80183	OK
ENSG00000025293	-	-	ENSG00000025293	PHF20	-	20:34359895-34538303	-	-	8.84102	5.29594	12.3861	OK	11.2015	5.04076	17.3621	OK	10.007	4.00398	16.0101	OK	7.81548	4.07573	11.5552	OK
ENSG00000025423	-	-	ENSG00000025423	HSD17B6	-	12:57106211-57181574	-	-	0.235374	0	2.98433	OK	0.225332	0	3.15579	OK	0.367437	0	3.56941	OK	0.243524	0	3.2166	OK
ENSG00000025434	-	-	ENSG00000025434	NR1H3	-	11:47260852-47290396	-	-	3.61763	0	9.31487	OK	1.22661	0	4.85818	OK	1.94589	0	5.85239	OK	2.15252	0	6.9188	OK
ENSG00000025708	-	-	ENSG00000025708	TYMP	-	22:50961996-50971009	-	-	0.340713	0	1.81207	OK	0.356067	0	1.808	OK	0.1136	0	0.913025	OK	0.566357	0	2.15584	OK
ENSG00000025770	-	-	ENSG00000025770	NCAPH2	-	22:50946644-50961901	-	-	3.62165	0.613308	6.63	OK	2.03288	0.189396	3.87636	OK	3.60414	0	7.58557	OK	2.87137	0.346419	5.39632	OK
ENSG00000025772	-	-	ENSG00000025772	TOMM34	-	20:43538702-43589127	-	-	15.4072	11.0619	19.7525	OK	12.167	8.66294	15.671	OK	17.7163	12.8328	22.5999	OK	20.4427	14.9765	25.9089	OK
ENSG00000025796	-	-	ENSG00000025796	SEC63	-	6:108188959-108281190	-	-	46.3495	16.8742	75.8247	OK	45.1805	14.7801	75.5809	OK	85.4626	30.2746	140.651	OK	65.9408	26.3819	105.5	OK
ENSG00000025800	-	-	ENSG00000025800	KPNA6	-	1:32573638-32642169	-	-	12.9601	9.79119	16.129	OK	10.9136	8.20793	13.6192	OK	13.5826	10.2427	16.9225	OK	12.0097	9.01957	14.9998	OK
ENSG00000026025	-	-	ENSG00000026025	VIM	-	10:17256237-17279592	-	-	1991.8	908.558	3075.04	OK	1635.63	914.821	2356.44	OK	1983.24	1020.11	2946.36	OK	1644.6	759.43	2529.76	OK
ENSG00000026036	-	-	ENSG00000026036	RTEL1-TNFRSF6B	-	20:62289162-62374858	-	-	1.45884	0.332701	2.58497	OK	0.721877	0	1.54235	OK	0.735194	0	1.5762	OK	1.82882	0.607094	3.05055	OK
ENSG00000026103	-	-	ENSG00000026103	FAS	-	10:90639490-90775542	-	-	4.38167	1.17188	7.59147	OK	4.71681	1.86219	7.57142	OK	2.55387	0.0269324	5.08081	OK	2.84128	0.789632	4.89293	OK
ENSG00000026297	-	-	ENSG00000026297	RNASET2	-	6:166822851-167370679	-	-	4.1563	0	11.5646	OK	4.35832	0	10.9255	OK	4.38207	0	11.8379	OK	5.80792	0	13.3665	OK
ENSG00000026508	-	-	ENSG00000026508	CD44	-	11:35160416-35253949	-	-	64.9969	36.4164	93.5774	OK	76.0375	47.9764	104.099	OK	73.3484	43.481	103.216	OK	57.2207	33.9986	80.4429	OK
ENSG00000026559	-	-	ENSG00000026559	KCNG1	-	20:49615906-49639666	-	-	0.0425491	0	1.03501	OK	1.2099	0	2.6214	OK	0.0742813	0	1.06751	OK	0.0243737	0	1.02392	OK
ENSG00000026652	-	-	ENSG00000026652	AGPAT4	-	6:161551010-161695093	-	-	6.69651	2.96344	10.4296	OK	6.28566	0.426153	12.1452	OK	6.12925	0.857025	11.4015	OK	6.17972	2.15689	10.2025	OK
ENSG00000026751	-	-	ENSG00000026751	SLAMF7	-	1:160709036-160724611	-	-	0	0	0	OK	0.0369201	0	1.12439	OK	0	0	0	OK	0	0	0	OK
ENSG00000026950	-	-	ENSG00000026950	BTN3A1	-	6:26402464-26415444	-	-	2.52943	0.56568	4.49318	OK	1.1315	0	2.53935	OK	3.63726	0.398179	6.87634	OK	2.63876	0.592015	4.6855	OK
ENSG00000027001	-	-	ENSG00000027001	MIPEP	-	13:24304327-24476794	-	-	14.0329	3.48074	24.5851	OK	11.3744	3.97808	18.7708	OK	13.3069	5.28386	21.3299	OK	14.6618	4.42284	24.9008	OK
ENSG00000027075	-	-	ENSG00000027075	PRKCH	-	14:61654276-62125414	-	-	42.9959	28.7762	57.2155	OK	41.3423	23.2952	59.3894	OK	71.5754	50.6037	92.5471	OK	50.0797	32.2981	67.8612	OK
ENSG00000027644	-	-	ENSG00000027644	INSRR	-	1:156776034-156851642	-	-	0	0	0	OK	0	0	0	OK	0.00976595	0	0.0821821	OK	0	0	0	OK
ENSG00000027697	-	-	ENSG00000027697	IFNGR1	-	6:137518620-137540586	-	-	11.7264	8.10266	15.3502	OK	15.9846	11.4244	20.5447	OK	17.1743	11.9587	22.3898	OK	13.764	9.67281	17.8552	OK
ENSG00000027847	-	-	ENSG00000027847	B4GALT7	-	5:177027100-177037348	-	-	5.70353	2.01335	9.39371	OK	4.05108	1.29394	6.80822	OK	8.72053	4.53223	12.9088	OK	9.38169	4.55072	14.2127	OK
ENSG00000027869	-	-	ENSG00000027869	SH2D2A	-	1:156776034-156851642	-	-	0.456854	0	1.59373	OK	0.457688	0	1.63572	OK	0.533193	0	2.12265	OK	0.11801	0	1.11392	OK
ENSG00000028116	-	-	ENSG00000028116	VRK2	-	2:58134785-58468821	-	-	11.7589	6.39277	17.125	OK	12.0993	6.09433	18.1042	OK	6.68375	3.567	9.8005	OK	7.05246	3.50116	10.6038	OK
ENSG00000028137	-	-	ENSG00000028137	TNFRSF1B	-	1:12227059-12269285	-	-	6.68902	3.936	9.44203	OK	5.08771	2.62426	7.55116	OK	3.41877	0.74811	6.08944	OK	3.15305	0.935133	5.37097	OK
ENSG00000028203	-	-	ENSG00000028203	VEZT	-	12:95611521-95696566	-	-	37.4723	22.0838	52.8609	OK	42.8948	24.3241	61.4654	OK	34.4731	16.9828	51.9635	OK	29.9556	17.8515	42.0596	OK
ENSG00000028277	-	-	ENSG00000028277	POU2F2	-	19:42590262-42700737	-	-	4.64966	0	11.7914	OK	2.48988	0	8.66506	OK	5.86454	0	14.664	OK	1.65515	0	7.49213	OK
ENSG00000028310	-	-	ENSG00000028310	BRD9	-	5:710470-919472	-	-	13.5009	8.34604	18.6557	OK	12.7945	7.37952	18.2096	OK	13.7489	7.85551	19.6423	OK	19.1999	12.3991	26.0007	OK
ENSG00000028528	-	-	ENSG00000028528	SNX1	-	15:64386321-64438289	-	-	22.145	14.1468	30.1432	OK	19.9564	12.3817	27.5312	OK	26.0167	16.9669	35.0664	OK	20.3699	12.8399	27.8999	OK
ENSG00000028839	-	-	ENSG00000028839	TBPL1	-	6:134273307-134373774	-	-	21.5	9.67123	33.3288	OK	21.1973	11.104	31.2906	OK	20.1143	8.67216	31.5564	OK	19.4158	10.2199	28.6117	OK
ENSG00000029153	-	-	ENSG00000029153	ARNTL2	-	12:27485786-27599558	-	-	8.96255	5.8362	12.0889	OK	8.32099	4.62228	12.0197	OK	7.55155	4.77278	10.3303	OK	6.62828	3.77375	9.48281	OK
ENSG00000029363	-	-	ENSG00000029363	BCLAF1	-	6:136578000-136610989	-	-	45.3859	21.6937	69.078	OK	40.9168	23.1842	58.6494	OK	52.5081	29.0828	75.9335	OK	35.6545	20.9424	50.3667	OK
ENSG00000029364	-	-	ENSG00000029364	SLC39A9	-	14:69846847-69929105	-	-	16.7436	7.03133	26.4559	OK	15.6118	4.23398	26.9896	OK	18.6704	8.47087	28.8699	OK	17.1951	6.0957	28.2945	OK
ENSG00000029534	-	-	ENSG00000029534	ANK1	-	8:41510738-41754280	-	-	0.26887	0	1.78459	OK	0.136455	0	1.59707	OK	0.261921	0	2.13853	OK	0.157475	0	1.61729	OK
ENSG00000029559	-	-	ENSG00000029559	IBSP	-	4:88720732-88733074	-	-	0	0	0	OK	0	0	0	OK	0	0	0	OK	0	0	0	OK
ENSG00000029639	-	-	ENSG00000029639	TFB1M	-	6:155054458-155635627	-	-	7.94193	0	18.641	OK	7.22344	0	15.1608	OK	7.35659	1.90105	12.8121	OK	7.82605	1.96918	13.6829	OK
ENSG00000029725	-	-	ENSG00000029725	RABEP1	-	17:5185557-5372380	-	-	10.8783	4.28557	17.4711	OK	11.2458	1.96713	20.5245	OK	12.9374	0	26.0446	OK	10.8019	3.52923	18.0745	OK
ENSG00000029993	-	-	ENSG00000029993	HMGB3	-	X:150148981-150159248	-	-	29.0061	15.6521	42.3601	OK	41.1543	22.9165	59.3921	OK	25.9163	17.0498	34.7829	OK	22.37	14.0783	30.6616	OK
ENSG00000030066	-	-	ENSG00000030066	NUP160	-	11:47799638-47870107	-	-	7.60464	0.353681	14.8556	OK	6.81146	1.25358	12.3693	OK	10.0076	0.902657	19.1125	OK	5.90356	1.49224	10.3149	OK
ENSG00000030110	-	-	ENSG00000030110	BAK1	-	6:33540328-33548019	-	-	1.97505	0.754886	3.19522	OK	0.625301	0	1.27051	OK	1.78879	0.635106	2.94247	OK	3.05059	1.52082	4.58037	OK
ENSG00000030304	-	-	ENSG00000030304	MUSK	-	9:113431050-113563859	-	-	0	0	0	OK	0	0	0	OK	0.068779	0	1.07369	OK	0	0	0	OK
ENSG00000030419	-	-	ENSG00000030419	IKZF2	-	2:213446080-214017151	-	-	0.0180836	0	1.64332	OK	0.0425964	0	1.27586	OK	0.0041722	0	1.62295	OK	0.0307082	0	1.66409	OK
ENSG00000030582	-	-	ENSG00000030582	GRN	-	17:42422613-42430470	-	-	113.93	75.0381	152.822	OK	81.6291	55.8201	107.438	OK	112.862	74.9261	150.798	OK	119.754	82.1669	157.341	OK
ENSG00000031003	-	-	ENSG00000031003	FAM13B	-	5:137150021-137387650	-	-	4.53779	0.374065	8.70152	OK	6.446	0	15.5435	OK	3.61579	0.682486	6.54909	OK	3.35168	0	6.83768	OK
ENSG00000031081	-	-	ENSG00000031081	ARHGAP31	-	3:119013219-119139561	-	-	9.92597	7.41406	12.4379	OK	8.8943	6.61683	11.1718	OK	11.9081	8.97844	14.8379	OK	10.9835	8.08717	13.8798	OK
ENSG00000031544	-	-	ENSG00000031544	NR2E3	-	15:72084976-72110600	-	-	0.104787	0	1.17581	OK	0.109544	0	1.15374	OK	0.550585	0	1.90458	OK	0.168439	0	1.14133	OK
ENSG00000031691	-	-	ENSG00000031691	CENPQ	-	6:49431090-49460820	-	-	2.43795	1.39511	3.48079	OK	2.4193	1.38528	3.45332	OK	2.75356	1.62434	3.88278	OK	1.97008	1.07561	2.86456	OK
ENSG00000031698	-	-	ENSG00000031698	SARS	-	1:109756539-109780791	-	-	37.2964	27.6745	46.9183	OK	37.5144	26.984	48.0447	OK	55.276	38.9487	71.6032	OK	43.9915	32.5759	55.4071	OK
ENSG00000031823	-	-	ENSG00000031823	RANBP3	-	19:5916149-5978153	-	-	38.0666	17.0387	59.0945	OK	24.9763	9.89844	40.0542	OK	26.3326	5.61072	47.0545	OK	23.9957	10.0267	37.9646	OK
ENSG00000032219	-	-	ENSG00000032219	ARID4A	-	14:58765102-58862359	-	-	7.27347	3.60293	10.944	OK	6.93337	2.40782	11.4589	OK	10.0693	3.6026	16.5361	OK	12.4149	3.91462	20.9152	OK
ENSG00000032389	-	-	ENSG00000032389	TSSC1	-	2:3192695-3381653	-	-	12.0062	6.88222	17.1301	OK	9.41833	5.21301	13.6237	OK	13.7597	6.70804	20.8114	OK	13.3699	8.18459	18.5553	OK
ENSG00000032444	-	-	ENSG00000032444	PNPLA6	-	19:7587511-7626650	-	-	23.8338	15.0677	32.6	OK	22.92	9.89844	35.9415	OK	28.1414	14.2855	41.9973	OK	29.666	17.1808	42.1511	OK
ENSG00000032742	-	-	ENSG00000032742	IFT88	-	13:21140584-21265503	-	-	4.94109	0	10.215	OK	4.60548	0.0511363	9.15982	OK	5.14713	1.12129	9.17298	OK	4.14713	0.190448	8.10382	OK
ENSG00000033011	-	-	ENSG00000033011	ALG1	-	16:4932507-5147809	-	-	6.39855	2.40448	10.3926	OK	2.95853	0.527351	5.3897	OK	10.7481	1.79943	19.6968	OK	6.79054	1.84792	11.7332	OK
ENSG00000033030	-	-	ENSG00000033030	ZCCHC8	-	12:122957416-122985518	-	-	4.84006	2.28629	7.39383	OK	7.80535	4.87705	10.7336	OK	8.29656	4.96569	11.6274	OK	6.98818	3.8329	10.1435	OK
ENSG00000033050	-	-	ENSG00000033050	ABCF2	-	7:150904922-150924316	-	-	34.9041	21.706	48.1021	OK	28.0503	17.0405	39.0601	OK	26.5659	15.7285	37.4032	OK	25.7219	9.4916	41.9522	OK
ENSG00000033100	-	-	ENSG00000033100	CHPF2	-	7:150929574-150974982	-	-	14.9319	10.412	19.4519	OK	15.3319	10.9089	19.755	OK	24.7061	15.6735	33.7387	OK	22.5944	16.0714	29.1173	OK
ENSG00000033122	-	-	ENSG00000033122	LRRC7	-	1:70034080-70671303	-	-	0.281511	0	1.88735	OK	0.211999	0	1.79497	OK	0.319647	0	1.99547	OK	0.152548	0	1.68808	OK
ENSG00000033170	-	-	ENSG00000033170	FUT8	-	14:65877309-66210839	-	-	12.0021	7.33344	16.6708	OK	13.5271	8.2558	18.7985	OK	10.983	5.49785	16.4682	OK	12.0243	5.19047	18.8581	OK
ENSG00000033178	-	-	ENSG00000033178	UBA6	-	4:68478369-68566897	-	-	21.3629	10.8346	31.8912	OK	28.2479	11.7463	44.7496	OK	23.1581	12.5724	33.7439	OK	14.885	7.88782	21.8822	OK
ENSG00000033327	-	-	ENSG00000033327	GAB2	-	11:77926342-78285919	-	-	8.75763	3.91219	13.6031	OK	9.1088	3.00755	15.21	OK	9.11446	3.79045	14.4385	OK	6.74191	2.55871	10.9251	OK
ENSG00000033627	-	-	ENSG00000033627	ATP6V0A1	-	17:40610861-40674629	-	-	12.4115	2.6369	22.1861	OK	14.5219	7.17263	21.8711	OK	26.4843	14.5782	38.3905	OK	14.385	7.05597	21.714	OK
ENSG00000033800	-	-	ENSG00000033800	PIAS1	-	15:68346516-68549549	-	-	15.0212	7.99369	22.0487	OK	13.9298	6.34847	21.5111	OK	11.3802	6.0717	16.6887	OK	12.7811	5.50554	20.0566	OK
ENSG00000033867	-	-	ENSG00000033867	SLC4A7	-	3:27414213-27525911	-	-	12.3792	7.94293	16.8155	OK	24.0036	12.1182	35.8889	OK	37.5776	22.9463	52.2089	OK	25.9776	10.8006	41.1545	OK
ENSG00000034053	-	-	ENSG00000034053	APBA2	-	15:29129628-29410518	-	-	4.25091	0.612936	7.88889	OK	3.39204	1.20185	5.58224	OK	3.39567	0.996305	5.79503	OK	3.35154	1.00179	5.70128	OK
ENSG00000034063	-	-	ENSG00000034063	UHRF1	-	19:4903091-4962165	-	-	5.49139	3.84031	7.14246	OK	4.70701	3.2861	6.12792	OK	3.68898	2.44371	4.93425	OK	2.92901	1.87918	3.97884	OK
ENSG00000034152	-	-	ENSG00000034152	MAP2K3	-	17:21187983-21218552	-	-	6.71034	0.214822	13.2059	OK	8.53982	3.28746	13.7922	OK	9.6938	3.09291	16.2947	OK	7.69008	1.83131	13.5489	OK
ENSG00000034239	-	-	ENSG00000034239	EFCAB1	-	8:49623347-49647870	-	-	0	0	0	OK	0	0	0	OK	0	0	0	OK	0	0	0	OK
ENSG00000034510	-	-	ENSG00000034510	TMSB10	-	2:85048773-85134132	-	-	3346.89	2578.61	4115.17	OK	3590.08	2768.3	4411.86	OK	3002.61	2315.92	3689.31	OK	3697	2830.84	4563.17	OK
ENSG00000034533	-	-	ENSG00000034533	ASTE1	-	3:130569438-131100319	-	-	1.67527	0	4.17234	OK	1.10169	0	4.62165	OK	1.04419	0	3.38182	OK	1.31362	0	3.76243	OK
ENSG00000034677	-	-	ENSG00000034677	RNF19A	-	8:101170133-101348446	-	-	28.4409	11.4308	45.4509	OK	36.1969	13.489	58.9049	OK	38.4945	18.6468	58.3422	OK	44.0621	22.8127	65.3114	OK
ENSG00000034693	-	-	ENSG00000034693	PEX3	-	6:143771943-143832827	-	-	4.90642	0.221723	9.59112	OK	7.38885	1.95817	12.8195	OK	6.20139	1.46274	10.94	OK	4.42359	0.579974	8.2672	OK
ENSG00000034713	-	-	ENSG00000034713	GABARAPL2	-	16:75562429-75657198	-	-	61.1099	41.92	80.2997	OK	63.4244	45.0235	81.8252	OK	71.2471	50.3302	92.1639	OK	80.3658	58.2684	102.463	OK
ENSG00000034971	-	-	ENSG00000034971	MYOC	-	1:171604556-171621823	-	-	0	0	0	OK	0	0	0	OK	0	0	0	OK	0	0	0	OK
ENSG00000035115	-	-	ENSG00000035115	SH3YL1	-	2:217729-278283	-	-	10.1712	0	23.3442	OK	6.74922	0	14.5695	OK	8.84227	0	18.6528	OK	12.3953	0.366978	24.4236	OK
ENSG00000035141	-	-	ENSG00000035141	FAM136A	-	2:70523106-70529222	-	-	9.02417	5.52997	12.5184	OK	8.5544	5.13863	11.9702	OK	9.68829	4.58523	14.7913	OK	9.17163	5.56958	12.7737	OK
ENSG00000035403	-	-	ENSG00000035403	VCL	-	10:75757871-75879918	-	-	47.8264	36.093	59.5598	OK	51.8107	39.7305	63.891	OK	39.8878	29.7203	50.0552	OK	50.9905	33.1692	68.8119	OK
ENSG00000035499	-	-	ENSG00000035499	DEPDC1B	-	5:59892738-59996017	-	-	2.45571	0.838077	4.07335	OK	1.7822	0.225369	3.33902	OK	2.2502	0.573961	3.92643	OK	1.78983	0.0937537	3.48591	OK
ENSG00000035664	-	-	ENSG00000035664	DAPK2	-	15:64199234-64364232	-	-	2.21407	0	4.63761	OK	2.07601	0	4.73146	OK	2.27883	0	5.03783	OK	3.14988	0.402179	5.89758	OK
ENSG00000035681	-	-	ENSG00000035681	NSMAF	-	8:59496062-59572403	-	-	16.4423	9.12331	23.7613	OK	10.6541	5.81845	15.4898	OK	10.6032	5.60982	15.5965	OK	10.6813	5.64566	15.717	OK
ENSG00000035687	-	-	ENSG00000035687	ADSS	-	1:244515936-244615436	-	-	25.3386	18.6956	31.9817	OK	29.1711	20.6303	37.7119	OK	35.9365	26.3612	45.5117	OK	22.7512	16.8965	28.6059	OK
ENSG00000035720	-	-	ENSG00000035720	STAP1	-	4:68424445-68473055	-	-	0	0	0	OK	0	0	0	OK	0.0179515	0	0.364416	OK	0	0	0	OK
ENSG00000035862	-	-	ENSG00000035862	TIMP2	-	17:76849058-76921469	-	-	117.442	90.4199	144.464	OK	89.9966	69.0774	110.916	OK	106.551	81.8943	131.207	OK	124.236	95.9183	152.553	OK
ENSG00000035928	-	-	ENSG00000035928	RFC1	-	4:39289075-39367995	-	-	15.5369	4.22353	26.8502	OK	14.4001	5.07274	23.7275	OK	24.8687	8.38562	41.3518	OK	11.2475	5.50193	16.9931	OK
ENSG00000036054	-	-	ENSG00000036054	TBC1D23	-	3:99979843-100044095	-	-	8.48308	4.95689	12.0093	OK	9.01468	5.9405	12.0889	OK	13.4084	7.31983	19.4969	OK	8.52175	5.22325	11.8203	OK
ENSG00000036257	-	-	ENSG00000036257	CUL3	-	2:225334866-225450110	-	-	86.6575	52.754	120.561	OK	74.5507	33.1463	115.955	OK	64.7087	38.7199	90.6975	OK	55.2487	27.0289	83.4685	OK
ENSG00000036448	-	-	ENSG00000036448	MYOM2	-	8:1993154-2113475	-	-	0.395013	0	2.94426	OK	0.0668569	0	3.00113	OK	0.0963818	0	3.12308	OK	0.935495	0	4.1847	OK
ENSG00000036473	-	-	ENSG00000036473	OTC	-	X:37208527-38548169	-	-	0	0	0	OK	0	0	0	OK	0	0	0	OK	0.144299	0	1.9388	OK
ENSG00000036530	-	-	ENSG00000036530	CYP46A1	-	14:100150640-100193638	-	-	0.0250836	0	1.1387	OK	0.0305361	0	1.04763	OK	0.0666206	0	1.08721	OK	0.0783504	0	1.10605	OK
ENSG00000036549	-	-	ENSG00000036549	ZZZ3	-	1:78028100-78149104	-	-	12.8935	5.29295	20.494	OK	10.7092	4.3164	17.1021	OK	10.7575	4.71271	16.8023	OK	9.93114	4.5062	15.3561	OK
ENSG00000036565	-	-	ENSG00000036565	SLC18A1	-	8:20002365-20040717	-	-	0	0	0	OK	0	0	0	OK	0	0	0	OK	0	0	0	OK
ENSG00000036672	-	-	ENSG00000036672	USP2	-	11:119225924-119252436	-	-	0.534322	0	1.77163	OK	0.21209	0	1.43594	OK	0.289198	0	1.53306	OK	0.271983	0	1.55957	OK
ENSG00000036828	-	-	ENSG00000036828	CASR	-	3:121902529-122005342	-	-	0	0	0	OK	0	0	0	OK	0	0	0	OK	0	0	0	OK
ENSG00000037042	-	-	ENSG00000037042	TUBG2	-	17:40811322-40819024	-	-	1.54042	0.518471	2.56236	OK	1.21762	0.354339	2.0809	OK	1.77044	0.606305	2.93458	OK	2.05044	0.813193	3.2877	OK
ENSG00000037241	-	-	ENSG00000037241	RPL26L1	-	5:172381788-172396774	-	-	19.9226	9.31137	30.5338	OK	24.702	8.56489	40.8392	OK	19.6137	12.0473	27.18	OK	27.7905	14.5946	40.9865	OK
ENSG00000037280	-	-	ENSG00000037280	FLT4	-	5:180028505-180076624	-	-	5.23866	2.34994	8.12739	OK	5.63509	3.04293	8.22726	OK	4.72601	2.06344	7.38859	OK	9.43001	5.38487	13.4751	OK
ENSG00000037474	-	-	ENSG00000037474	NSUN2	-	5:6599351-6633404	-	-	22.7058	13.9229	31.4886	OK	26.7521	18.8679	34.6363	OK	30.7476	20.162	41.3333	OK	24.5722	16.4384	32.7061	OK
ENSG00000037637	-	-	ENSG00000037637	FBXO42	-	1:16573333-16678949	-	-	2.67981	0.329119	5.0305	OK	1.664	0.45461	2.8734	OK	2.29902	1.02326	3.57477	OK	2.64589	1.16143	4.13036	OK
ENSG00000037749	-	-	ENSG00000037749	MFAP3	-	5:153369687-153825410	-	-	10.4377	2.91981	17.9557	OK	10.2088	4.00356	16.414	OK	13.2637	5.62042	20.907	OK	10.9432	5.06109	16.8253	OK
ENSG00000037757	-	-	ENSG00000037757	MRI1	-	19:13875345-13889276	-	-	5.39181	0.801043	9.98258	OK	3.3865	0	6.7802	OK	4.60613	0.339442	8.87281	OK	3.65919	0	7.65366	OK
ENSG00000037897	-	-	ENSG00000037897	METTL1	-	12:58156116-58212487	-	-	4.65504	0	10.4429	OK	8.10198	0	16.8806	OK	12.1558	2.21014	22.1015	OK	10.0585	1.5674	18.5495	OK
ENSG00000037965	-	-	ENSG00000037965	HOXC8	-	12:54375292-54449814	-	-	0.115698	0	0.392759	OK	0.134249	0	0.313547	OK	0.176188	0	0.45557	OK	0.233145	0	0.470962	OK
ENSG00000038002	-	-	ENSG00000038002	AGA	-	4:178351923-178363657	-	-	5.37151	0	10.8148	OK	3.3698	1.1697	5.56991	OK	6.70007	1.79195	11.6082	OK	3.93983	1.34639	6.53328	OK
ENSG00000038210	-	-	ENSG00000038210	PI4K2B	-	4:25162262-25280714	-	-	11.488	7.67495	15.3011	OK	10.4125	5.35858	15.4664	OK	12.3533	5.56527	19.1413	OK	12.3196	4.43687	20.2023	OK
ENSG00000038219	-	-	ENSG00000038219	BOD1L1	-	4:13570361-13629347	-	-	10.1321	0	25.8716	OK	11.0767	0	29.151	OK	11.8706	0	25.3016	OK	10.9087	0	24.0178	OK
ENSG00000038274	-	-	ENSG00000038274	MAT2B	-	5:162930119-162946342	-	-	45.2398	32.1265	58.3531	OK	39.5324	27.0043	52.0604	OK	49.9734	35.1346	64.8121	OK	41.9508	29.856	54.0456	OK
ENSG00000038295	-	-	ENSG00000038295	TLL1	-	4:166794409-167025047	-	-	0.635406	0	1.54554	OK	1.03296	0	2.3717	OK	0.68389	0	1.79299	OK	0.351145	0	1.40028	OK
ENSG00000038358	-	-	ENSG00000038358	EDC4	-	16:67906925-67922758	-	-	18.7947	9.75139	27.8379	OK	12.5492	6.18305	18.9153	OK	13.2098	6.58338	19.8362	OK	16.981	8.73735	25.2247	OK
ENSG00000038382	-	-	ENSG00000038382	TRIO	-	5:14143810-14532235	-	-	34.1529	13.4285	54.8773	OK	26.9585	9.74902	44.168	OK	37.3074	16.3583	58.2566	OK	23.9051	7.28164	40.5286	OK
ENSG00000038427	-	-	ENSG00000038427	VCAN	-	5:82767283-82878122	-	-	0.282821	0	1.66482	OK	0.224921	0	1.34561	OK	0.00437924	0	1.29985	OK	0.00585772	0	1.30957	OK
ENSG00000038532	-	-	ENSG00000038532	CLEC16A	-	16:11038344-11276046	-	-	6.69653	3.65145	9.7416	OK	5.29121	2.41413	8.1683	OK	5.49706	2.46353	8.53058	OK	6.10447	2.07627	10.1327	OK
ENSG00000038945	-	-	ENSG00000038945	MSR1	-	8:15965386-16424999	-	-	0.646575	0	3.5161	OK	3.31901	0.162106	6.47591	OK	0.0860592	0	2.79728	OK	1.02211	0	3.46847	OK
ENSG00000039068	-	-	ENSG00000039068	CDH1	-	16:68771127-68869451	-	-	0	0	0	OK	0.0689994	0	2.13234	OK	0.0867909	0	2.15669	OK	0.154498	0	2.25313	OK
ENSG00000039123	-	-	ENSG00000039123	SKIV2L2	-	5:54603587-54830878	-	-	18.8482	10.0952	27.6012	OK	14.7646	7.73322	21.7961	OK	20.8481	11.2469	30.4493	OK	15.6516	8.35072	22.9525	OK
ENSG00000039139	-	-	ENSG00000039139	DNAH5	-	5:13690439-13944652	-	-	0.436632	0	1.25927	OK	0.285269	0	1.01386	OK	1.22126	0.0985079	2.34402	OK	0.484202	0	1.30484	OK
ENSG00000039319	-	-	ENSG00000039319	ZFYVE16	-	5:79703831-79775169	-	-	8.63274	4.38338	12.8821	OK	8.97234	3.58896	14.3557	OK	8.92453	4.99525	12.8538	OK	8.37553	3.99197	12.7591	OK
ENSG00000039523	-	-	ENSG00000039523	FAM65A	-	16:67552320-67580691	-	-	38.4218	24.6412	52.2023	OK	55.696	37.3415	74.0505	OK	40.2941	25.4898	55.0983	OK	37.9815	25.2506	50.7125	OK
ENSG00000039537	-	-	ENSG00000039537	C6	-	5:41142335-41261540	-	-	0	0	0	OK	0	0	0	OK	0	0	0	OK	0	0	0	OK
ENSG00000039560	-	-	ENSG00000039560	RAI14	-	5:34656341-34832732	-	-	72.0647	34.8331	109.296	OK	72.1948	40.4042	103.985	OK	116.54	69.9753	163.105	OK	73.8904	39.7389	108.042	OK
ENSG00000039600	-	-	ENSG00000039600	SOX30	-	5:157052686-157098488	-	-	0	0	0	OK	0.0801734	0	0.363243	OK	0	0	0	OK	0	0	0	OK
ENSG00000039650	-	-	ENSG00000039650	PNKP	-	19:50364460-50371166	-	-	4.80786	0.433525	9.1822	OK	6.4884	0.737452	12.2393	OK	8.96583	2.68913	15.2425	OK	6.90821	1.20755	12.6089	OK
ENSG00000039987	-	-	ENSG00000039987	BEST2	-	19:12862515-12869272	-	-	0	0	0	OK	0	0	0	OK	0	0	0	OK	0	0	0	OK
ENSG00000040199	-	-	ENSG00000040199	PHLPP2	-	16:71657610-71758604	-	-	2.405	0.876851	3.93315	OK	1.80071	0.689059	2.91235	OK	1.43089	0.114136	2.74765	OK	1.61656	0.279461	2.95366	OK
ENSG00000040275	-	-	ENSG00000040275	SPDL1	-	5:169010637-169031782	-	-	15.3091	5.83135	24.7868	OK	11.9402	6.95697	16.9234	OK	11.1102	6.97977	15.2407	OK	7.97864	4.47645	11.4808	OK
ENSG00000040341	-	-	ENSG00000040341	STAU2	-	8:74332238-74791145	-	-	24.8315	12.1149	37.5482	OK	22.1326	7.75182	36.5134	OK	15.3814	4.98978	25.773	OK	20.3391	8.15285	32.5253	OK
ENSG00000040487	-	-	ENSG00000040487	PQLC2	-	1:19638819-19655794	-	-	7.00927	3.85143	10.1671	OK	4.12101	1.91856	6.32347	OK	7.36496	4.03078	10.6991	OK	4.89333	2.38222	7.40443	OK
ENSG00000040531	-	-	ENSG00000040531	CTNS	-	17:3539761-3564836	-	-	9.2127	1.67869	16.7467	OK	7.20983	0.395264	14.0244	OK	11.1683	4.91544	17.4211	OK	7.10971	2.0514	12.168	OK
ENSG00000040608	-	-	ENSG00000040608	RTN4R	-	22:20228937-20270769	-	-	0.263971	0	1.59596	OK	0.995696	0	2.7673	OK	0.267688	0	1.59605	OK	0.17398	0	1.59417	OK
ENSG00000040633	-	-	ENSG00000040633	PHF23	-	17:7138346-7143041	-	-	10.6699	4.86851	16.4713	OK	5.00171	0.346164	9.65726	OK	9.70676	3.9174	15.4961	OK	13.5457	3.33093	23.7604	OK
ENSG00000040731	-	-	ENSG00000040731	CDH10	-	5:24487208-24645087	-	-	0	0	0	OK	0.0243763	0	0.462267	OK	0	0	0	OK	0	0	0	OK
ENSG00000040933	-	-	ENSG00000040933	INPP4A	-	2:99061316-99210853	-	-	2.81158	1.37608	4.24708	OK	3.12296	1.1925	5.05342	OK	3.61945	1.86824	5.37066	OK	4.78226	1.78137	7.78316	OK
ENSG00000041353	-	-	ENSG00000041353	RAB27B	-	18:52385090-52565314	-	-	0	0	0	OK	0.00472046	0	1.33782	OK	0.0165138	0	1.55294	OK	0.0170984	0	1.35777	OK
ENSG00000041357	-	-	ENSG00000041357	PSMA4	-	15:78832746-78841604	-	-	170.385	115.889	224.881	OK	149.323	97.0199	201.627	OK	145.851	96.4043	195.299	OK	160.156	100.478	219.833	OK
ENSG00000041515	-	-	ENSG00000041515	MYO16	-	13:109248499-109860355	-	-	0	0	0	OK	0	0	0	OK	0	0	0	OK	0	0	0	OK
ENSG00000041802	-	-	ENSG00000041802	LSG1	-	3:194304739-194393206	-	-	25.0918	8.93719	41.2463	OK	19.0442	6.05283	32.0356	OK	21.903	7.89235	35.9136	OK	19.1245	4.51697	33.732	OK
ENSG00000041880	-	-	ENSG00000041880	PARP3	-	3:51976360-51982883	-	-	3.08571	0.915326	5.2561	OK	2.39125	0.726001	4.05649	OK	2.63518	0.850931	4.41943	OK	2.57517	0.832585	4.31776	OK
ENSG00000041982	-	-	ENSG00000041982	TNC	-	9:117782805-117880536	-	-	0.048737	0	1.48453	OK	0.0585033	0	1.81171	OK	0.0697739	0	1.50837	OK	0.0679603	0	1.90294	OK
ENSG00000041988	-	-	ENSG00000041988	THAP3	-	1:6684925-6761984	-	-	4.57424	0.0820956	9.06639	OK	2.24985	0	6.48259	OK	6.19253	0.509721	11.8753	OK	5.20104	0.242642	10.1594	OK
ENSG00000042062	-	-	ENSG00000042062	FAM65C	-	20:49202644-49308065	-	-	0.563229	0	1.53331	OK	0.176202	0	0.894713	OK	0.244559	0	0.959001	OK	0.302685	0	1.08302	OK
ENSG00000042088	-	-	ENSG00000042088	TDP1	-	14:90421282-90511106	-	-	4.40299	0.865397	7.94059	OK	7.04862	3.21889	10.8783	OK	8.95275	4.12092	13.7846	OK	6.12988	2.90256	9.3572	OK
ENSG00000042286	-	-	ENSG00000042286	AIFM2	-	10:71812551-71892690	-	-	2.08201	1.12954	3.03447	OK	1.32693	0.50483	2.14902	OK	1.04916	0.317072	1.78125	OK	1.31866	0.546932	2.09038	OK
ENSG00000042304	-	-	ENSG00000042304	C2orf83	-	2:228474805-228513322	-	-	0	0	0	OK	0.0856551	0	0.351312	OK	0.117245	0	0.392142	OK	0.0323305	0	0.266453	OK
ENSG00000042317	-	-	ENSG00000042317	SPATA7	-	14:88851267-89021077	-	-	6.27464	1.0601	11.4892	OK	3.9844	0	8.27391	OK	4.66536	0	9.67766	OK	3.91614	0	8.18146	OK
ENSG00000042429	-	-	ENSG00000042429	MED17	-	11:93394804-93547861	-	-	19.0589	0	38.1926	OK	21.1683	2.49838	39.8382	OK	19.8146	0	41.2836	OK	20.5989	0	41.5915	OK
ENSG00000042445	-	-	ENSG00000042445	RETSAT	-	2:85569210-85618875	-	-	9.7555	6.18541	13.3256	OK	10.0453	6.52155	13.569	OK	11.29	7.46957	15.1103	OK	13.4899	9.10376	17.8761	OK
ENSG00000042493	-	-	ENSG00000042493	CAPG	-	2:85621870-85645555	-	-	13.2501	0.691223	25.8089	OK	9.82765	4.45436	15.2009	OK	9.13895	3.6564	14.6215	OK	12.0485	5.56742	18.5295	OK
ENSG00000042753	-	-	ENSG00000042753	AP2S1	-	19:47341392-47354249	-	-	33.9121	21.0505	46.7737	OK	31.0155	19.8752	42.1557	OK	40.5858	27.3951	53.7765	OK	46.8325	31.6322	62.0329	OK
ENSG00000042781	-	-	ENSG00000042781	USH2A	-	1:215796235-216596738	-	-	0	0	0	OK	0	0	0	OK	0	0	0	OK	0.00154285	0	0.80311	OK
ENSG00000042813	-	-	ENSG00000042813	ZPBP	-	7:49813256-50199426	-	-	0	0	0	OK	0	0	0	OK	0	0	0	OK	0	0	0	OK
ENSG00000042832	-	-	ENSG00000042832	TG	-	8:133879202-134147147	-	-	0	0	0	OK	0.0778665	0	3.08383	OK	0.1259	0	4.06973	OK	0.198617	0	3.17657	OK
ENSG00000042980	-	-	ENSG00000042980	ADAM28	-	8:24151552-24769586	-	-	0	0	0	OK	0	0	0	OK	0.00448248	0	2.11366	OK	0	0	0	OK
ENSG00000043039	-	-	ENSG00000043039	BARX2	-	11:129245834-129322171	-	-	0	0	0	OK	0.0670025	0	0.505816	OK	0.0202354	0	0.455055	OK	0.123543	0	0.600364	OK
ENSG00000043093	-	-	ENSG00000043093	DCUN1D1	-	3:182655861-182703741	-	-	6.94436	4.15362	9.7351	OK	7.21043	4.45447	9.96639	OK	8.92838	4.82959	13.0272	OK	6.173	3.93847	8.40752	OK
ENSG00000043143	-	-	ENSG00000043143	JADE2	-	5:133860002-133918918	-	-	1.80785	0.328675	3.28703	OK	1.48698	0.0264512	2.94751	OK	0.967742	0	2.36042	OK	1.16774	0	3.03157	OK
ENSG00000043355	-	-	ENSG00000043355	ZIC2	-	13:100634025-100639018	-	-	0	0	0	OK	0	0	0	OK	0	0	0	OK	0	0	0	OK
ENSG00000043462	-	-	ENSG00000043462	LCP2	-	5:169659450-169725231	-	-	0	0	0	OK	0.0993181	0	1.49452	OK	0.941766	0	2.59293	OK	0.313388	0	2.1348	OK
ENSG00000043514	-	-	ENSG00000043514	TRIT1	-	1:40306722-40349183	-	-	9.88647	3.89764	15.8753	OK	8.87024	0	18.2102	OK	8.37719	3.82647	12.9279	OK	7.15112	2.51617	11.7861	OK
ENSG00000043591	-	-	ENSG00000043591	ADRB1	-	10:115803805-115806667	-	-	0	0	0	OK	0	0	0	OK	0.0194349	0	0.154925	OK	0.0608938	0	0.24886	OK
ENSG00000044012	-	-	ENSG00000044012	GUCA2B	-	1:42619091-42621495	-	-	0	0	0	OK	0	0	0	OK	0	0	0	OK	0	0	0	OK
ENSG00000044090	-	-	ENSG00000044090	CUL7	-	6:43005354-43042837	-	-	3.23298	1.94757	4.51838	OK	2.7336	1.64831	3.81889	OK	3.41926	2.09235	4.74617	OK	4.28193	2.76888	5.79497	OK
ENSG00000044115	-	-	ENSG00000044115	CTNNA1	-	5:137946655-138270723	-	-	104.048	41.8847	166.211	OK	94.219	33.3251	155.113	OK	132.695	39.3122	226.078	OK	127.574	40.6908	214.456	OK
ENSG00000044446	-	-	ENSG00000044446	PHKA2	-	X:18908413-19002716	-	-	3.47665	0	7.32885	OK	2.86121	0	5.7892	OK	2.76828	0	5.87385	OK	2.8647	0	6.42755	OK
ENSG00000044459	-	-	ENSG00000044459	CNTLN	-	9:17134979-17503921	-	-	4.46273	1.80103	7.12442	OK	5.06219	1.73987	8.38451	OK	2.62897	1.36192	3.89601	OK	3.24538	1.61572	4.87504	OK
ENSG00000044524	-	-	ENSG00000044524	EPHA3	-	3:89156673-89531284	-	-	0	0	0	OK	0	0	0	OK	0	0	0	OK	0	0	0	OK
ENSG00000044574	-	-	ENSG00000044574	HSPA5	-	9:127997131-128003609	-	-	147.367	113.799	180.935	OK	296.555	228.614	364.496	OK	791.565	603.304	979.825	OK	447.71	343.752	551.669	OK
ENSG00000046604	-	-	ENSG00000046604	DSG2	-	18:29078005-29136874	-	-	0	0	0	OK	0.0287945	0	0.348523	OK	0.00966494	0	0.326905	OK	0.00781327	0	0.325107	OK
ENSG00000046647	-	-	ENSG00000046647	GEMIN8	-	X:14026397-14048012	-	-	12.1145	5.88536	18.3436	OK	7.98766	3.9937	11.9816	OK	8.06091	3.10499	13.0168	OK	13.9061	6.67341	21.1388	OK
ENSG00000046651	-	-	ENSG00000046651	OFD1	-	X:13752831-13787480	-	-	2.27338	0.734121	3.81264	OK	3.23929	0.806877	5.67171	OK	2.99098	0.796065	5.1859	OK	3.17441	1.12427	5.22455	OK
ENSG00000046653	-	-	ENSG00000046653	GPM6B	-	X:13789149-13956757	-	-	0.297649	0	1.6663	OK	0.868578	0	2.63007	OK	0.394338	0	1.82038	OK	0.571443	0	2.17733	OK
ENSG00000046774	-	-	ENSG00000046774	MAGEC2	-	X:141290130-141293076	-	-	0	0	0	OK	0	0	0	OK	0	0	0	OK	0	0	0	OK
ENSG00000046889	-	-	ENSG00000046889	PREX2	-	8:68864352-69149265	-	-	4.4533	2.49029	6.41631	OK	4.72349	2.55676	6.89022	OK	4.29775	1.11281	7.4827	OK	3.54348	0.539389	6.54756	OK
ENSG00000047056	-	-	ENSG00000047056	WDR37	-	10:1095477-1178237	-	-	6.57681	3.35431	9.79932	OK	6.36381	3.70572	9.02191	OK	7.32259	3.71405	10.9311	OK	6.89669	4.27877	9.51461	OK
ENSG00000047188	-	-	ENSG00000047188	YTHDC2	-	5:112849379-112930982	-	-	13.0365	8.03929	18.0337	OK	12.2237	6.39877	18.0486	OK	9.96147	6.37753	13.5454	OK	8.35346	5.21253	11.4944	OK
ENSG00000047230	-	-	ENSG00000047230	CTPS2	-	X:16606125-16731059	-	-	5.57844	2.98679	8.1701	OK	6.17837	3.20052	9.15622	OK	4.1688	2.08105	6.25654	OK	4.83921	2.49922	7.17919	OK
ENSG00000047249	-	-	ENSG00000047249	ATP6V1H	-	8:54628116-54756118	-	-	16.4203	6.55958	26.2811	OK	16.9737	7.77116	26.1763	OK	16.2892	8.25868	24.3197	OK	19.3625	10.5015	28.2234	OK
ENSG00000047315	-	-	ENSG00000047315	POLR2B	-	4:57829535-58071676	-	-	76.0042	0	159.361	OK	71.4701	0	152.957	OK	77.4297	0	155.788	OK	55.8569	0	123.769	OK
ENSG00000047346	-	-	ENSG00000047346	FAM214A	-	15:52870038-53002014	-	-	19.0927	10.1062	28.0792	OK	27.1906	15.8065	38.5747	OK	17.2481	8.71257	25.7836	OK	22.4475	13.3769	31.518	OK
ENSG00000047365	-	-	ENSG00000047365	ARAP2	-	4:35949842-36275842	-	-	0	0	0	OK	0	0	0	OK	0.00702572	0	2.23451	OK	0.0137871	0	2.22775	OK
ENSG00000047410	-	-	ENSG00000047410	TPR	-	1:186265404-186344825	-	-	17.4354	3.20416	31.6666	OK	16.7845	4.60835	28.9606	OK	16.3214	2.89082	29.752	OK	15.5885	3.03249	28.1446	OK
ENSG00000047457	-	-	ENSG00000047457	CP	-	3:148847370-148939842	-	-	0.439798	0	2.27928	OK	0.352414	0	2.10632	OK	0.314906	0	2.06578	OK	0.847907	0	2.78462	OK
ENSG00000047578	-	-	ENSG00000047578	KIAA0556	-	16:27561453-27791690	-	-	3.18806	0	7.39742	OK	5.08384	1.34461	8.82307	OK	5.79978	0.376449	11.2231	OK	5.11395	0.326775	9.90112	OK
ENSG00000047579	-	-	ENSG00000047579	DTNBP1	-	6:15523031-15663289	-	-	11.366	7.80107	14.9309	OK	9.22089	6.19874	12.243	OK	9.15359	6.05364	12.2535	OK	20.5116	14.7619	26.2612	OK
ENSG00000047597	-	-	ENSG00000047597	XK	-	X:37208527-38548169	-	-	0	0	0	OK	0.0081799	0	0.182642	OK	0.00980767	0	0.170242	OK	0	0	0	OK
ENSG00000047617	-	-	ENSG00000047617	ANO2	-	12:5641034-6055398	-	-	5.06531	1.9117	8.21892	OK	3.65737	1.05193	6.26282	OK	2.81103	0.508476	5.11358	OK	4.78133	1.89307	7.66959	OK
ENSG00000047621	-	-	ENSG00000047621	C12orf4	-	12:4596893-4647674	-	-	4.72717	1.51127	7.94306	OK	4.45039	1.85181	7.04897	OK	4.35202	1.33632	7.36771	OK	4.213	1.43383	6.99218	OK
ENSG00000047634	-	-	ENSG00000047634	SCML1	-	X:17755587-17773105	-	-	8.34338	5.51862	11.1681	OK	8.75691	5.87274	11.6411	OK	9.53305	6.51726	12.5488	OK	7.67316	5.01378	10.3325	OK
ENSG00000047644	-	-	ENSG00000047644	WWC3	-	X:9983601-10112518	-	-	17.1227	6.68177	27.5637	OK	14.8616	8.96266	20.7606	OK	15.0199	11.2822	18.7575	OK	14.0782	8.9851	19.1713	OK
ENSG00000047648	-	-	ENSG00000047648	ARHGAP6	-	X:11129420-11683821	-	-	0.329743	0	1.17842	OK	0.199552	0	0.767784	OK	1.20037	0.127316	2.27343	OK	1.11849	0	2.25513	OK
ENSG00000047662	-	-	ENSG00000047662	FAM184B	-	4:17616253-17783135	-	-	0.901135	0.368757	1.43351	OK	0.520017	0.126255	0.913778	OK	0.729832	0.234839	1.22483	OK	0.812495	0.30966	1.31533	OK
ENSG00000047849	-	-	ENSG00000047849	MAP4	-	3:47892181-48130769	-	-	49.4476	35.0689	63.8264	OK	45.4185	33.9865	56.8505	OK	57.9358	36.0132	79.8585	OK	50.0127	36.8466	63.1787	OK
ENSG00000047932	-	-	ENSG00000047932	GOPC	-	6:117609462-117923691	-	-	7.68947	4.65807	10.7209	OK	7.08852	4.28852	9.88852	OK	11.3734	7.68803	15.0587	OK	8.90942	5.89222	11.9266	OK
ENSG00000047936	-	-	ENSG00000047936	ROS1	-	6:117609462-117923691	-	-	0	0	0	OK	0	0	0	OK	0	0	0	OK	0	0	0	OK
ENSG00000048028	-	-	ENSG00000048028	USP28	-	11:113668595-113746292	-	-	8.50006	4.02826	12.9719	OK	8.55446	2.68205	14.4269	OK	6.54891	3.02441	10.0734	OK	9.19351	3.9587	14.4283	OK
ENSG00000048052	-	-	ENSG00000048052	HDAC9	-	7:18126571-19042039	-	-	0.412548	0	2.80545	OK	1.08895	0	3.67103	OK	3.69723	0.235698	7.15876	OK	3.78925	0.705895	6.87261	OK
ENSG00000048140	-	-	ENSG00000048140	TSPAN17	-	5:176074387-176086058	-	-	19.8847	14.1276	25.6418	OK	18.6931	13.2139	24.1724	OK	18.9374	12.5279	25.347	OK	19.8041	13.592	26.0162	OK
ENSG00000048162	-	-	ENSG00000048162	NOP16	-	5:175792470-175843570	-	-	8.57284	1.10679	16.0389	OK	7.34473	2.01894	12.6705	OK	11.0624	2.37005	19.7547	OK	9.79452	2.01198	17.5771	OK
ENSG00000048342	-	-	ENSG00000048342	CC2D2A	-	4:15471488-15603180	-	-	4.30206	0.759952	7.84417	OK	4.76224	0.102504	9.42197	OK	4.60223	0	9.84883	OK	4.6949	0.649235	8.74056	OK
ENSG00000048392	-	-	ENSG00000048392	RRM2B	-	8:103216729-103251346	-	-	14.5045	8.30957	20.6993	OK	17.4753	10.0858	24.8648	OK	14.7052	8.38377	21.0266	OK	13.4769	0	27.7107	OK
ENSG00000048405	-	-	ENSG00000048405	ZNF800	-	7:126986843-127071978	-	-	5.82068	1.71123	9.93014	OK	12.3858	4.54429	20.2274	OK	10.5665	3.26793	17.865	OK	8.80027	3.48384	14.1167	OK
ENSG00000048462	-	-	ENSG00000048462	TNFRSF17	-	16:12021229-12070500	-	-	0	0	0	OK	0	0	0	OK	0.277301	0	1.34964	OK	0.0571172	0	0.981937	OK
ENSG00000048471	-	-	ENSG00000048471	SNX29	-	16:12070593-12704901	-	-	2.66605	0.392609	4.93948	OK	2.16688	0.466323	3.86744	OK	1.68679	0	3.41288	OK	1.72781	0	3.58528	OK
ENSG00000048540	-	-	ENSG00000048540	LMO3	-	12:16500075-16763528	-	-	1.02804	0	4.51327	OK	0.389019	0	3.27754	OK	0.171351	0	2.87429	OK	0.528717	0	3.29776	OK
ENSG00000048544	-	-	ENSG00000048544	MRPS10	-	6:42174538-42185603	-	-	22.7074	16.7853	28.6296	OK	20.7695	15.2997	26.2393	OK	19.0475	13.941	24.1539	OK	19.6795	14.4549	24.9041	OK
ENSG00000048545	-	-	ENSG00000048545	GUCA1A	-	6:42123143-42147794	-	-	0	0	0	OK	0	0	0	OK	0.143858	0	0.871732	OK	0.0237612	0	0.69191	OK
ENSG00000048649	-	-	ENSG00000048649	RSF1	-	11:77371040-77532063	-	-	16.1499	7.25697	25.0429	OK	18.2453	9.24447	27.2461	OK	19.8531	9.50302	30.2032	OK	18.0582	7.98616	28.1303	OK
ENSG00000048707	-	-	ENSG00000048707	VPS13D	-	1:12290123-12572099	-	-	6.34989	0.493601	12.2062	OK	8.10528	0	16.4691	OK	4.06435	0	8.207	OK	6.31906	1.29368	11.3444	OK
ENSG00000048740	-	-	ENSG00000048740	CELF2	-	10:11047258-11378674	-	-	12.9981	9.28117	16.715	OK	13.4183	9.96114	16.8755	OK	16.6911	12.2795	21.1026	OK	12.1433	8.60607	15.6805	OK
ENSG00000048828	-	-	ENSG00000048828	FAM120A	-	9:96208775-96328397	-	-	35.08	25.5309	44.6291	OK	29.7043	21.7715	37.6372	OK	31.1409	22.9619	39.3198	OK	33.0171	24.1421	41.8922	OK
ENSG00000048991	-	-	ENSG00000048991	R3HDM1	-	2:136289024-136482840	-	-	25.0179	0	55.606	OK	15.1172	5.63674	24.5976	OK	16.9335	8.03475	25.8323	OK	14.3876	6.50625	22.2689	OK
ENSG00000049089	-	-	ENSG00000049089	COL9A2	-	1:40766158-40783488	-	-	0	0	0	OK	0.133022	0	2.02064	OK	0.0513905	0	2.26348	OK	0	0	0	OK
ENSG00000049130	-	-	ENSG00000049130	KITLG	-	12:88886569-88974628	-	-	7.92742	4.56645	11.2884	OK	49.4398	35.5411	63.3385	OK	40.486	30.0343	50.9377	OK	24.2002	16.7825	31.6178	OK
ENSG00000049167	-	-	ENSG00000049167	ERCC8	-	5:60169657-60240900	-	-	4.01267	1.74794	6.2774	OK	4.05346	1.86077	6.24615	OK	4.164	1.84713	6.48086	OK	4.49359	1.93431	7.05287	OK
ENSG00000049192	-	-	ENSG00000049192	ADAMTS6	-	5:64444562-64777747	-	-	8.49282	2.44558	14.5401	OK	8.51152	3.95575	13.0673	OK	7.4058	3.00161	11.81	OK	4.95448	2.39937	7.5096	OK
ENSG00000049239	-	-	ENSG00000049239	H6PD	-	1:9294833-9331396	-	-	4.4348	2.94162	5.92799	OK	4.38991	2.96383	5.81599	OK	4.298	2.8772	5.7188	OK	5.10341	3.21504	6.99177	OK
ENSG00000049245	-	-	ENSG00000049245	VAMP3	-	1:7831328-7841492	-	-	65.0254	49.158	80.8929	OK	63.165	46.7953	79.5347	OK	68.7895	52.09	85.4891	OK	70.0933	51.6978	88.4888	OK
ENSG00000049246	-	-	ENSG00000049246	PER3	-	1:7844379-7913572	-	-	0.58954	0	1.82606	OK	1.69507	0	4.04551	OK	0.423315	0	1.57562	OK	0.652147	0	1.91242	OK
ENSG00000049247	-	-	ENSG00000049247	UTS2	-	1:7844379-7913572	-	-	0.126019	0	1.14823	OK	0.0727072	0	1.123	OK	0.355218	0	1.42687	OK	0.102354	0	1.12145	OK
ENSG00000049249	-	-	ENSG00000049249	TNFRSF9	-	1:7979906-8000926	-	-	0.49999	0	1.59668	OK	0.0736868	0	1.09827	OK	0.0797658	0	1.11104	OK	0.0220364	0	1.03068	OK
ENSG00000049283	-	-	ENSG00000049283	EPN3	-	17:48609903-48633213	-	-	0	0	0	OK	0.106992	0	2.73493	OK	0	0	0	OK	0.129374	0	2.4102	OK
ENSG00000049319	-	-	ENSG00000049319	SRD5A2	-	2:31747549-31806136	-	-	0	0	0	OK	0	0	0	OK	0	0	0	OK	0	0	0	OK
ENSG00000049323	-	-	ENSG00000049323	LTBP1	-	2:33172038-33624576	-	-	25.8562	17.9933	33.7191	OK	22.7222	17.1209	28.3235	OK	25.8188	18.2702	33.3674	OK	20.881	14.8035	26.9586	OK
ENSG00000049449	-	-	ENSG00000049449	RCN1	-	11:31806339-32127301	-	-	136.259	103.042	169.475	OK	140.684	106.47	174.897	OK	152.36	113.387	191.332	OK	122.152	92.9944	151.31	OK
ENSG00000049540	-	-	ENSG00000049540	ELN	-	7:73442118-73484237	-	-	0.107079	0	4.25615	OK	0.247195	0	2.86772	OK	0.465741	0	3.12773	OK	0.021925	0	4.08011	OK
ENSG00000049541	-	-	ENSG00000049541	RFC2	-	7:73645828-73668774	-	-	12.9126	6.88854	18.9367	OK	8.46905	3.46063	13.4775	OK	11.8875	5.80716	17.9679	OK	7.04217	2.50802	11.5763	OK
ENSG00000049618	-	-	ENSG00000049618	ARID1B	-	6:157099062-157531913	-	-	9.62049	6.33658	12.9044	OK	8.16995	5.07038	11.2695	OK	6.81879	4.73729	8.90029	OK	8.36707	5.61739	11.1167	OK
ENSG00000049656	-	-	ENSG00000049656	CLPTM1L	-	5:1317858-1345214	-	-	49.2426	32.1823	66.3029	OK	68.5713	44.9	92.2425	OK	82.1123	54.8376	109.387	OK	72.368	50.2028	94.5331	OK
ENSG00000049759	-	-	ENSG00000049759	NEDD4L	-	18:55711598-56068772	-	-	8.40777	0.682819	16.1327	OK	9.21952	0	20.2757	OK	22.395	8.50531	36.2848	OK	30.9764	8.60952	53.3434	OK
ENSG00000049768	-	-	ENSG00000049768	FOXP3	-	X:49091926-49121288	-	-	0	0	0	OK	0.144901	0	0.915631	OK	0.102642	0	0.79377	OK	0.0369975	0	0.623683	OK
ENSG00000049769	-	-	ENSG00000049769	PPP1R3F	-	X:49126305-49157929	-	-	0.797128	0	2.06165	OK	0.48626	0	1.79204	OK	0.589283	0	1.80182	OK	0.308933	0	1.28543	OK
ENSG00000049860	-	-	ENSG00000049860	HEXB	-	5:73923233-74072737	-	-	106.599	58.5552	154.643	OK	124.718	63.6809	185.755	OK	102.004	51.8802	152.129	OK	121.504	44.8881	198.12	OK
ENSG00000049883	-	-	ENSG00000049883	PTCD2	-	5:71515235-71656052	-	-	1.72618	0	3.94754	OK	1.64456	0	3.46485	OK	2.40855	0	4.95134	OK	2.52326	0.209662	4.83686	OK
ENSG00000050030	-	-	ENSG00000050030	KIAA2022	-	X:73952683-74145282	-	-	0	0	0	OK	0	0	0	OK	0	0	0	OK	0.00214255	0	0.668778	OK
ENSG00000050130	-	-	ENSG00000050130	JKAMP	-	14:59895739-60043549	-	-	29.6569	20.3072	39.0067	OK	34.9802	23.9228	46.0375	OK	34.8787	23.6892	46.0682	OK	36.2406	25.0645	47.4168	OK
ENSG00000050165	-	-	ENSG00000050165	DKK3	-	11:11984652-12031316	-	-	42.0344	26.4179	57.6508	OK	40.725	28.7478	52.7022	OK	42.3371	28.3136	56.3607	OK	42.6506	31.072	54.2293	OK
ENSG00000050327	-	-	ENSG00000050327	ARHGEF5	-	7:143883175-144077725	-	-	0.150749	0	0.681804	OK	0.0607631	0	0.589448	OK	0.00911681	0	0.505439	OK	0.00390256	0	0.498382	OK
ENSG00000050344	-	-	ENSG00000050344	NFE2L3	-	7:26191859-26226745	-	-	24.5444	18.0479	31.0409	OK	28.3371	19.0837	37.5905	OK	33.4503	18.7562	48.1443	OK	25.3156	16.3113	34.3199	OK
ENSG00000050393	-	-	ENSG00000050393	MCUR1	-	6:13786788-13814800	-	-	10.3559	5.27367	15.4382	OK	10.6292	6.38077	14.8777	OK	15.8473	9.23823	22.4563	OK	10.5949	6.31798	14.8718	OK
ENSG00000050405	-	-	ENSG00000050405	LIMA1	-	12:50569570-50677329	-	-	22.1377	15.5244	28.7509	OK	25.0795	17.8448	32.3142	OK	14.6182	10.1014	19.135	OK	14.5619	10.1663	18.9575	OK
ENSG00000050426	-	-	ENSG00000050426	LETMD1	-	12:51441744-51454207	-	-	15.3776	7.87701	22.8781	OK	8.02024	1.54574	14.4947	OK	14.1166	7.00461	21.2286	OK	12.8734	6.13352	19.6133	OK
ENSG00000050438	-	-	ENSG00000050438	SLC4A8	-	12:51745030-51902980	-	-	1.90167	0	4.77288	OK	2.09809	0	7.62006	OK	2.6019	0	8.46278	OK	1.79733	0	6.79327	OK
ENSG00000050555	-	-	ENSG00000050555	LAMC3	-	9:133884468-133969860	-	-	0	0	0	OK	0	0	0	OK	0	0	0	OK	0.0996248	0	0.568569	OK
ENSG00000050628	-	-	ENSG00000050628	PTGER3	-	1:71318035-71513491	-	-	0.35649	0	1.18522	OK	0.108014	0	0.890102	OK	0.260021	0	1.03219	OK	0.0863275	0	0.729352	OK
ENSG00000050730	-	-	ENSG00000050730	TNIP3	-	4:122052562-122148621	-	-	0.217642	0	1.27341	OK	0.844847	0	1.76431	OK	0.672292	0	2.11573	OK	0.125371	0	0.900194	OK
ENSG00000050748	-	-	ENSG00000050748	MAPK9	-	5:179660142-179719099	-	-	9.88538	4.75731	15.0135	OK	10.7577	4.11403	17.4013	OK	10.4642	4.31516	16.6133	OK	9.59504	4.39524	14.7948	OK
ENSG00000050767	-	-	ENSG00000050767	COL23A1	-	5:177664618-178017556	-	-	0	0	0	OK	0	0	0	OK	0	0	0	OK	0.00817708	0	0.727172	OK
ENSG00000050820	-	-	ENSG00000050820	BCAR1	-	16:75262927-75301951	-	-	78.7835	49.5871	107.98	OK	89.9174	56.3242	123.51	OK	74.7982	45.9077	103.689	OK	72.3273	35.3815	109.273	OK
ENSG00000051009	-	-	ENSG00000051009	FAM160A2	-	11:6232564-6255941	-	-	6.6766	3.52057	9.83264	OK	5.90909	2.88196	8.93622	OK	5.61787	2.77537	8.46036	OK	6.9438	3.55885	10.3287	OK
ENSG00000051108	-	-	ENSG00000051108	HERPUD1	-	16:56965959-56977798	-	-	37.8845	21.3976	54.3714	OK	206.532	137.706	275.358	OK	244.49	166.259	322.722	OK	49.3276	28.0801	70.5751	OK
ENSG00000051128	-	-	ENSG00000051128	HOMER3	-	19:19010322-19057640	-	-	112.962	75.4764	150.447	OK	79.4111	53.4148	105.407	OK	82.2806	49.2895	115.272	OK	82.0769	53.3858	110.768	OK
ENSG00000051180	-	-	ENSG00000051180	RAD51	-	15:40978921-41024354	-	-	4.78506	0.805834	8.76428	OK	3.96032	1.01477	6.90586	OK	5.61403	0.523981	10.7041	OK	2.9805	0.399859	5.56114	OK
ENSG00000051341	-	-	ENSG00000051341	POLQ	-	3:121150277-121264853	-	-	0.91641	0.12847	1.70435	OK	1.08528	0.0444372	2.12612	OK	1.2643	0.0478004	2.4808	OK	0.642433	0	1.3346	OK
ENSG00000051382	-	-	ENSG00000051382	PIK3CB	-	3:138372859-138553780	-	-	13.4436	6.46243	20.4248	OK	17.3789	10.1945	24.5634	OK	20.762	11.5813	29.9427	OK	15.6414	8.85575	22.427	OK
ENSG00000051523	-	-	ENSG00000051523	CYBA	-	16:88709690-88717560	-	-	6.99475	0	16.2331	OK	5.56153	0	14.3903	OK	7.58669	1.26966	13.9037	OK	11.545	0	25.3417	OK
ENSG00000051596	-	-	ENSG00000051596	THOC3	-	5:175333941-175461683	-	-	3.49107	0.43229	6.54986	OK	3.66216	0.240408	7.08392	OK	4.35285	0	8.97888	OK	3.56262	0	7.26725	OK
ENSG00000051620	-	-	ENSG00000051620	HEBP2	-	6:138723721-139018425	-	-	23.9188	10.4822	37.3553	OK	22.0688	9.71542	34.4222	OK	20.6802	9.58129	31.7791	OK	22.6515	10.8942	34.4088	OK
ENSG00000051825	-	-	ENSG00000051825	MPHOSPH9	-	12:123636866-123756881	-	-	7.80481	0	24.7057	OK	7.82313	0	26.9388	OK	10.1931	0	27.2211	OK	8.52604	0	28.9759	OK
ENSG00000052126	-	-	ENSG00000052126	PLEKHA5	-	12:19282647-19529334	-	-	3.47236	0.867566	6.07715	OK	3.06534	0.663551	5.46713	OK	2.88323	0.257904	5.50855	OK	3.21263	0.160551	6.26471	OK
ENSG00000052344	-	-	ENSG00000052344	PRSS8	-	16:31142753-31147083	-	-	0	0	0	OK	0	0	0	OK	0	0	0	OK	0.0511418	0	1.23719	OK
ENSG00000052723	-	-	ENSG00000052723	SIKE1	-	1:115312099-115323306	-	-	6.62976	0.557904	12.7016	OK	8.81038	2.49374	15.127	OK	10.4393	2.41299	18.4657	OK	7.85579	1.95019	13.7614	OK
ENSG00000052749	-	-	ENSG00000052749	RRP12	-	10:99116114-99185831	-	-	5.70078	0	11.4669	OK	7.6385	3.38392	11.8931	OK	6.87593	1.575	12.1769	OK	4.9878	1.3561	8.6195	OK
ENSG00000052795	-	-	ENSG00000052795	FNIP2	-	4:159690289-159959912	-	-	1.34007	0.0966705	2.58347	OK	1.33047	0	2.68515	OK	2.5412	1.01963	4.06278	OK	2.30515	0.616773	3.99353	OK
ENSG00000052802	-	-	ENSG00000052802	MSMO1	-	4:166248774-166264312	-	-	38.2775	28.3962	48.1588	OK	32.0654	23.0655	41.0652	OK	47.6092	34.638	60.5804	OK	44.0825	32.8465	55.3185	OK
ENSG00000052841	-	-	ENSG00000052841	TTC17	-	11:43333512-43516483	-	-	29.8091	12.1239	47.4943	OK	29.0029	13.0301	44.9756	OK	26.7643	12.7436	40.7849	OK	29.7195	15.445	43.994	OK
ENSG00000052850	-	-	ENSG00000052850	ALX4	-	11:44281993-44331716	-	-	0	0	0	OK	0.0167332	0	0.0740642	OK	0	0	0	OK	0.0175104	0	0.0732763	OK
ENSG00000053108	-	-	ENSG00000053108	FSTL4	-	5:132496129-132948255	-	-	0	0	0	OK	0	0	0	OK	0	0	0	OK	0	0	0	OK
ENSG00000053254	-	-	ENSG00000053254	FOXN3	-	14:89591214-90421121	-	-	16.1559	0	32.7858	OK	10.6882	3.3683	18.0081	OK	8.75258	1.41578	16.0894	OK	5.69489	0	11.3987	OK
ENSG00000053328	-	-	ENSG00000053328	METTL24	-	6:110501343-110679475	-	-	0	0	0	OK	0	0	0	OK	0	0	0	OK	0	0	0	OK
ENSG00000053371	-	-	ENSG00000053371	AKR7A2	-	1:19630458-19638640	-	-	15.4083	10.0026	20.814	OK	16.5204	10.7609	22.28	OK	15.8253	9.97439	21.6762	OK	15.9989	10.2459	21.7519	OK
ENSG00000053372	-	-	ENSG00000053372	MRTO4	-	1:19536994-19586622	-	-	10.1815	4.58509	15.7779	OK	8.49907	2.50961	14.4885	OK	9.19718	0.794021	17.6003	OK	9.1953	2.27191	16.1187	OK
ENSG00000053438	-	-	ENSG00000053438	NNAT	-	20:36120873-36156333	-	-	9.66678	2.22564	17.1079	OK	11.6005	2.18702	21.014	OK	9.13359	3.11269	15.1545	OK	7.96771	2.10186	13.8336	OK
ENSG00000053501	-	-	ENSG00000053501	USE1	-	19:17326154-17330638	-	-	6.47029	2.87658	10.064	OK	5.85871	2.54475	9.17266	OK	5.24583	1.75556	8.73609	OK	6.29688	2.67588	9.91787	OK
ENSG00000053524	-	-	ENSG00000053524	MCF2L2	-	3:182895830-183146566	-	-	0.0706373	0	1.62466	OK	0.118024	0	1.66137	OK	0.170358	0	1.77476	OK	0.176423	0	1.73679	OK
ENSG00000053702	-	-	ENSG00000053702	NRIP2	-	12:2904118-3050306	-	-	0.127202	0	1.16301	OK	0.150964	0	1.19444	OK	0.156724	0	1.51024	OK	0.344132	0	1.59633	OK
ENSG00000053747	-	-	ENSG00000053747	LAMA3	-	18:21269406-21535030	-	-	1.5382	0	3.63296	OK	1.99054	0	4.72878	OK	1.14082	0	3.83501	OK	1.03723	0	3.27072	OK
ENSG00000053770	-	-	ENSG00000053770	AP5M1	-	14:57670517-57756797	-	-	12.5549	2.63194	22.4778	OK	13.3217	1.74569	24.8977	OK	12.296	0.369912	24.222	OK	10.6016	2.32012	18.883	OK
ENSG00000053900	-	-	ENSG00000053900	ANAPC4	-	4:25378834-25420120	-	-	8.12698	4.69247	11.5615	OK	8.52643	4.34756	12.7053	OK	8.59598	4.04886	13.1431	OK	7.91626	4.41643	11.4161	OK
ENSG00000053918	-	-	ENSG00000053918	KCNQ1	-	11:2465913-2882798	-	-	0	0	0	OK	0.0220005	0	1.98197	OK	0	0	0	OK	0.0182702	0	1.96711	OK
ENSG00000054116	-	-	ENSG00000054116	TRAPPC3	-	1:36602172-36615098	-	-	86.7732	30.8245	142.722	OK	62.2075	24.6563	99.7588	OK	54.677	13.2712	96.0828	OK	61.9874	23.6801	100.295	OK
ENSG00000054118	-	-	ENSG00000054118	THRAP3	-	1:36690016-36770958	-	-	31.0646	15.037	47.0922	OK	29.3472	14.1616	44.5327	OK	28.3915	15.6002	41.1828	OK	29.1482	16.4108	41.8857	OK
ENSG00000054148	-	-	ENSG00000054148	PHPT1	-	9:139743175-139755249	-	-	20.4727	11.2936	29.6517	OK	16.6042	10.0598	23.1485	OK	21.964	13.7824	30.1457	OK	23.4827	15.2757	31.6896	OK
ENSG00000054179	-	-	ENSG00000054179	ENTPD2	-	9:139942549-139948497	-	-	0	0	0	OK	0	0	0	OK	0	0	0	OK	0	0	0	OK
ENSG00000054219	-	-	ENSG00000054219	LY75	-	2:160568999-160761260	-	-	1.37848	0	4.03421	OK	1.17899	0	3.58129	OK	1.06009	0	2.44165	OK	1.56127	0	4.00229	OK
ENSG00000054267	-	-	ENSG00000054267	ARID4B	-	1:235294497-235507847	-	-	26.6283	0	54.5502	OK	28.6133	0	62.7248	OK	26.8225	0	54.8606	OK	18.607	0	38.6214	OK
ENSG00000054277	-	-	ENSG00000054277	OPN3	-	1:241695433-241965435	-	-	7.52731	2.98248	12.0721	OK	7.04251	2.4015	11.6835	OK	5.52021	1.51627	9.52414	OK	8.11507	3.20441	13.0257	OK
ENSG00000054282	-	-	ENSG00000054282	SDCCAG8	-	1:243419319-244014381	-	-	9.90396	1.10198	18.7059	OK	9.71294	2.62061	16.8053	OK	11.4781	0	23.8421	OK	11.198	0	22.7763	OK
ENSG00000054356	-	-	ENSG00000054356	PTPRN	-	2:220154344-220174370	-	-	0	0	0	OK	0	0	0	OK	0	0	0	OK	0	0	0	OK
ENSG00000054392	-	-	ENSG00000054392	HHAT	-	1:210501595-210849638	-	-	0.437034	0	1.43948	OK	0.597747	0	1.41638	OK	0.34786	0	1.11454	OK	0.389439	0	1.14423	OK
ENSG00000054523	-	-	ENSG00000054523	KIF1B	-	1:10270862-10441661	-	-	9.62968	6.16834	13.091	OK	12.8051	6.50338	19.1068	OK	15.9791	11.5313	20.4268	OK	11.3523	6.00783	16.6967	OK
ENSG00000054598	-	-	ENSG00000054598	FOXC1	-	6:1610680-1614127	-	-	7.34646	4.96533	9.72758	OK	22.6089	16.7402	28.4775	OK	7.01956	4.70388	9.33524	OK	8.43107	5.81349	11.0486	OK
ENSG00000054611	-	-	ENSG00000054611	TBC1D22A	-	22:47158517-47571336	-	-	31.3121	21.3643	41.26	OK	30.8948	19.8404	41.9493	OK	25.9119	17.098	34.7259	OK	31.3381	19.762	42.9142	OK
ENSG00000054654	-	-	ENSG00000054654	SYNE2	-	14:64319682-64805317	-	-	4.22108	1.33229	7.10986	OK	4.80722	0.617937	8.99649	OK	5.4894	0	11.8691	OK	4.2631	0.482178	8.04401	OK
ENSG00000054690	-	-	ENSG00000054690	PLEKHH1	-	14:67913800-68067004	-	-	0.0802639	0	2.73595	OK	0.301019	0	2.97322	OK	0.84796	0	3.65872	OK	0.673618	0	3.49193	OK
ENSG00000054793	-	-	ENSG00000054793	ATP9A	-	20:50213052-50385173	-	-	11.9252	8.81863	15.0317	OK	10.6443	7.81888	13.4698	OK	11.7497	8.65808	14.8414	OK	7.61221	5.39922	9.8252	OK
ENSG00000054796	-	-	ENSG00000054796	SPO11	-	20:55904814-55919050	-	-	0	0	0	OK	0	0	0	OK	0	0	0	OK	0	0	0	OK
ENSG00000054803	-	-	ENSG00000054803	CBLN4	-	20:54572495-54580528	-	-	0	0	0	OK	0	0	0	OK	0	0	0	OK	0	0	0	OK
ENSG00000054938	-	-	ENSG00000054938	CHRDL2	-	11:74407473-74442430	-	-	0.952893	0	2.99862	OK	0	0	0	OK	0	0	0	OK	0	0	0	OK
ENSG00000054965	-	-	ENSG00000054965	FAM168A	-	11:73111531-73309234	-	-	5.01251	2.3537	7.67132	OK	4.21472	2.65701	5.77242	OK	3.49571	1.5931	5.39831	OK	4.5398	2.01893	7.06067	OK
ENSG00000054967	-	-	ENSG00000054967	RELT	-	11:73087308-73108519	-	-	0.875396	0	2.12272	OK	0.460512	0	1.63006	OK	1.44647	0.0799944	2.81294	OK	1.475	0.122798	2.8272	OK
ENSG00000054983	-	-	ENSG00000054983	GALC	-	14:88176762-88460009	-	-	8.54707	3.40624	13.6879	OK	7.74046	2.65646	12.8245	OK	7.35434	3.06338	11.6453	OK	6.38427	2.62176	10.1468	OK
ENSG00000055044	-	-	ENSG00000055044	NOP58	-	2:203130438-203168389	-	-	24.8808	12.0825	37.6791	OK	29.8688	14.3049	45.4328	OK	25.213	13.1422	37.2838	OK	19.8826	10.6349	29.1304	OK
ENSG00000055070	-	-	ENSG00000055070	SZRD1	-	1:16679069-16763919	-	-	22.3562	12.345	32.3675	OK	25.7837	14.2713	37.2962	OK	25.6066	14.2234	36.9897	OK	26.8279	13.6412	40.0145	OK
ENSG00000055118	-	-	ENSG00000055118	KCNH2	-	7:150642048-150675403	-	-	0	0	0	OK	0	0	0	OK	0	0	0	OK	0	0	0	OK
ENSG00000055130	-	-	ENSG00000055130	CUL1	-	7:148393558-148498128	-	-	19.0681	14.3698	23.7663	OK	19.8173	14.8844	24.7503	OK	20.8212	15.752	25.8903	OK	18.8403	14.0631	23.6176	OK
ENSG00000055147	-	-	ENSG00000055147	FAM114A2	-	5:153369687-153825410	-	-	5.9117	0.909472	10.9139	OK	4.99174	0.310207	9.67327	OK	7.19894	0.192092	14.2058	OK	5.92864	0.456815	11.4005	OK
ENSG00000055163	-	-	ENSG00000055163	CYFIP2	-	5:156687131-157002783	-	-	5.03068	0.851729	9.20962	OK	7.5451	1.77266	13.3175	OK	4.99438	0.37804	9.61072	OK	6.25586	0.358028	12.1537	OK
ENSG00000055208	-	-	ENSG00000055208	TAB2	-	6:149539061-149732749	-	-	16.9302	11.4684	22.392	OK	17.3451	12.0371	22.6531	OK	17.4332	11.2276	23.6388	OK	15.9245	9.6046	22.2444	OK
ENSG00000055211	-	-	ENSG00000055211	GINM1	-	6:149887429-149912884	-	-	19.8564	14.6035	25.1093	OK	17.5139	12.8109	22.2169	OK	21.9169	16.1522	27.6815	OK	22.0637	16.3193	27.8081	OK
ENSG00000055332	-	-	ENSG00000055332	EIF2AK2	-	2:37311593-37384208	-	-	8.76658	4.91941	12.6138	OK	9.44752	5.05379	13.8412	OK	8.22362	2.76883	13.6784	OK	9.65372	3.20335	16.1041	OK
ENSG00000055483	-	-	ENSG00000055483	USP36	-	17:76783462-76837523	-	-	8.13682	2.92069	13.353	OK	12.2913	5.76866	18.8139	OK	11.2321	5.07386	17.3904	OK	7.68013	2.56855	12.7917	OK
ENSG00000055609	-	-	ENSG00000055609	KMT2C	-	7:151832009-152133090	-	-	9.29649	0.264373	18.3286	OK	9.63289	3.92884	15.3369	OK	9.35361	3.781	14.9262	OK	6.90852	2.59987	11.2172	OK
ENSG00000055732	-	-	ENSG00000055732	MCOLN3	-	1:85464829-85598821	-	-	0	0	0	OK	0	0	0	OK	0.021583	0	0.369926	OK	0	0	0	OK
ENSG00000055813	-	-	ENSG00000055813	CCDC85A	-	2:56179292-56613308	-	-	1.52571	0.062867	2.98855	OK	1.48436	0	3.04507	OK	0.481462	0	1.31396	OK	0.768807	0.00110164	1.53651	OK
ENSG00000055917	-	-	ENSG00000055917	PUM2	-	2:20448451-20551995	-	-	20.7168	12.1738	29.2597	OK	23.3299	14.386	32.2737	OK	20.9731	13.4121	28.5341	OK	17.5251	9.71752	25.3327	OK
ENSG00000055950	-	-	ENSG00000055950	MRPL43	-	10:102729214-102754158	-	-	46.5953	28.0093	65.1814	OK	39.4821	21.9221	57.042	OK	35.4598	20.606	50.3136	OK	45.195	26.3577	64.0323	OK
ENSG00000055955	-	-	ENSG00000055955	ITIH4	-	3:52846990-52931612	-	-	0.0690697	0	2.32432	OK	0.0680332	0	2.31127	OK	0.21576	0	2.92703	OK	0.820198	0	3.75967	OK
ENSG00000055957	-	-	ENSG00000055957	ITIH1	-	3:52811602-52826078	-	-	0	0	0	OK	0	0	0	OK	0	0	0	OK	0	0	0	OK
ENSG00000056050	-	-	ENSG00000056050	C4orf27	-	4:170650615-170679104	-	-	14.3066	7.48681	21.1263	OK	10.0499	6.00275	14.0971	OK	7.58552	4.51907	10.652	OK	10.2557	2.84078	17.6707	OK
ENSG00000056097	-	-	ENSG00000056097	ZFR	-	5:32354455-32444867	-	-	24.5987	13.4406	35.7568	OK	23.0187	14.5496	31.4879	OK	23.8614	14.054	33.6688	OK	21.1759	12.1241	30.2277	OK
ENSG00000056277	-	-	ENSG00000056277	ZNF280C	-	X:129336684-129402873	-	-	2.2045	1.3136	3.09541	OK	3.31807	2.1234	4.51273	OK	2.41468	1.4652	3.36417	OK	2.05055	1.19283	2.90827	OK
ENSG00000056291	-	-	ENSG00000056291	NPFFR2	-	4:72897520-73013784	-	-	0	0	0	OK	0.0127041	0	0.570011	OK	0	0	0	OK	0.0186592	0	0.509873	OK
ENSG00000056487	-	-	ENSG00000056487	PHF21B	-	22:45277041-45405880	-	-	0	0	0	OK	0	0	0	OK	0.0562524	0	2.30998	OK	0	0	0	OK
ENSG00000056558	-	-	ENSG00000056558	TRAF1	-	9:123664670-123691451	-	-	0.531193	0.22241	0.839977	OK	3.608	2.43873	4.77728	OK	1.49362	0.871567	2.11568	OK	0.423926	0.118025	0.729828	OK
ENSG00000056586	-	-	ENSG00000056586	RC3H2	-	9:125606834-125667620	-	-	12.4429	6.65006	18.2357	OK	12.2022	7.63752	16.7668	OK	15.5272	8.50187	22.5525	OK	11.2145	6.15631	16.2726	OK
ENSG00000056661	-	-	ENSG00000056661	PCGF2	-	17:36886487-36906969	-	-	17.467	12.1959	22.738	OK	17.268	11.9263	22.6096	OK	19.9116	13.856	25.9672	OK	20.5565	14.2887	26.8242	OK
ENSG00000056678	-	-	ENSG00000056678	KIFC1	-	HSCHR6_MHC_MCF:33529671-33530001	-	-	0	0	0	OK	0	0	0	OK	0	0	0	OK	0	0	0	OK
ENSG00000056736	-	-	ENSG00000056736	IL17RB	-	3:53880606-53899827	-	-	0.372535	0	0.924803	OK	0.340243	0	0.806707	OK	0.651485	0	1.44602	OK	0.424588	0	0.954619	OK
ENSG00000056972	-	-	ENSG00000056972	TRAF3IP2	-	6:111620233-111927481	-	-	14.7158	2.84155	26.5901	OK	21.2361	9.28663	33.1857	OK	20.6941	6.28795	35.1003	OK	20.37	7.27015	33.4698	OK
ENSG00000056998	-	-	ENSG00000056998	GYG2	-	X:2746828-2800859	-	-	0	0	0	OK	0	0	0	OK	0.0330944	0	1.23231	OK	0.156851	0	1.27421	OK
ENSG00000057019	-	-	ENSG00000057019	DCBLD2	-	3:98433173-98620533	-	-	29.2857	15.9565	42.6148	OK	37.7105	26.4896	48.9313	OK	15.0649	9.01695	21.1128	OK	8.75951	4.22449	13.2945	OK
ENSG00000057149	-	-	ENSG00000057149	SERPINB3	-	18:61314812-61391127	-	-	0	0	0	OK	0	0	0	OK	0	0	0	OK	0	0	0	OK
ENSG00000057252	-	-	ENSG00000057252	SOAT1	-	1:179262924-179327815	-	-	10.2442	6.45983	14.0286	OK	10.3873	6.72785	14.0467	OK	12.4655	8.09254	16.8385	OK	9.76439	4.42422	15.1046	OK
ENSG00000057294	-	-	ENSG00000057294	PKP2	-	12:32943678-33049774	-	-	1.07337	0	2.61849	OK	0.104333	0	1.31006	OK	0.630308	0	2.01957	OK	0.216341	0	1.33503	OK
ENSG00000057468	-	-	ENSG00000057468	MSH4	-	1:76262566-76378923	-	-	0	0	0	OK	0.0141042	0	0.0961573	OK	0.00819168	0	0.0894836	OK	0.0210957	0	0.0868933	OK
ENSG00000057593	-	-	ENSG00000057593	F7	-	13:113760104-113774995	-	-	0	0	0	OK	0	0	0	OK	0	0	0	OK	0	0	0	OK
ENSG00000057608	-	-	ENSG00000057608	GDI2	-	10:5807185-5884095	-	-	179.533	137.674	221.391	OK	180.692	137.562	223.823	OK	183.768	141.826	225.71	OK	185.107	142.173	228.041	OK
ENSG00000057657	-	-	ENSG00000057657	PRDM1	-	6:106534194-106557814	-	-	0.716702	0	2.3486	OK	0.923608	0	2.29361	OK	3.60794	1.70071	5.51518	OK	6.32183	3.68467	8.95899	OK
ENSG00000057663	-	-	ENSG00000057663	ATG5	-	6:106632350-106773666	-	-	11.5457	8.40818	14.6833	OK	10.7229	7.73332	13.7125	OK	13.3143	8.1992	18.4294	OK	12.9415	9.23397	16.649	OK
ENSG00000057704	-	-	ENSG00000057704	TMCC3	-	12:94960899-95044338	-	-	9.28007	6.2963	12.2638	OK	10.9263	8.09799	13.7546	OK	7.07802	4.88634	9.2697	OK	7.96342	5.58189	10.3449	OK
ENSG00000057757	-	-	ENSG00000057757	PITHD1	-	1:24104894-24114722	-	-	12.4969	8.57785	16.416	OK	9.57059	6.26442	12.8768	OK	9.60659	6.3738	12.8394	OK	10.9925	7.39464	14.5904	OK
ENSG00000057935	-	-	ENSG00000057935	MTA3	-	2:42721708-42984087	-	-	19.4513	13.4899	25.4128	OK	15.8108	10.67	20.9517	OK	13.1425	8.17836	18.1066	OK	15.5651	10.2813	20.8489	OK
ENSG00000058056	-	-	ENSG00000058056	USP13	-	3:179370542-179507189	-	-	4.59003	1.93203	7.24803	OK	3.85246	2.21464	5.49027	OK	4.19804	2.50369	5.89239	OK	3.29637	2.02642	4.56633	OK
ENSG00000058063	-	-	ENSG00000058063	ATP11B	-	3:182511287-182639726	-	-	13.3555	7.95652	18.7545	OK	13.6629	8.14326	19.1825	OK	13.8492	8.69718	19.0011	OK	10.479	6.31639	14.6417	OK
ENSG00000058085	-	-	ENSG00000058085	LAMC2	-	1:183155372-183214035	-	-	0.16225	0	1.44912	OK	0.191677	0	1.47949	OK	0.0811758	0	1.3696	OK	0.134983	0	1.4179	OK
ENSG00000058091	-	-	ENSG00000058091	CDK14	-	7:89964536-90839905	-	-	4.97723	1.56733	8.38713	OK	4.70976	0.407028	9.01249	OK	5.41034	0.844123	9.97657	OK	3.26076	0	6.85373	OK
ENSG00000058262	-	-	ENSG00000058262	SEC61A1	-	3:127770483-128127485	-	-	64.3326	41.1148	87.5503	OK	58.5713	41.4714	75.6713	OK	87.738	60.7123	114.764	OK	81.8191	60.0302	103.608	OK
ENSG00000058272	-	-	ENSG00000058272	PPP1R12A	-	12:79968758-80334448	-	-	62.1137	27.4924	96.735	OK	49.4929	20.9135	78.0724	OK	50.1171	21.6923	78.5419	OK	66.8458	24.9796	108.712	OK
ENSG00000058335	-	-	ENSG00000058335	RASGRF1	-	15:79252288-79383115	-	-	0	0	0	OK	0	0	0	OK	0.0169292	0	1.92082	OK	0.0182316	0	1.81518	OK
ENSG00000058404	-	-	ENSG00000058404	CAMK2B	-	7:44256748-44374176	-	-	0.106345	0	2.29409	OK	1.04815	0	3.54576	OK	0.628163	0	3.03545	OK	0.198185	0	2.47354	OK
ENSG00000058453	-	-	ENSG00000058453	CROCC	-	1:17066767-17299474	-	-	6.46844	2.26671	10.6702	OK	1.95425	0	4.28542	OK	4.17411	0.556416	7.79181	OK	4.20303	0.247328	8.15873	OK
ENSG00000058600	-	-	ENSG00000058600	POLR3E	-	16:22308729-22346424	-	-	8.77848	3.557	14	OK	6.52726	3.14529	9.90923	OK	7.51733	4.15109	10.8836	OK	7.51039	3.82369	11.1971	OK
ENSG00000058668	-	-	ENSG00000058668	ATP2B4	-	1:203595688-203713209	-	-	49.4051	32.7966	66.0136	OK	51.7284	37.8871	65.5698	OK	34.159	22.2969	46.0211	OK	31.848	19.9856	43.7105	OK
ENSG00000058673	-	-	ENSG00000058673	ZC3H11A	-	1:203764781-203823252	-	-	30.8431	18.1446	43.5416	OK	30.7952	18.0341	43.5564	OK	30.8836	18.4137	43.3534	OK	28.2537	18.5098	37.9975	OK
ENSG00000058729	-	-	ENSG00000058729	RIOK2	-	5:96424778-96772921	-	-	8.90176	3.37017	14.4333	OK	13.5502	3.84294	23.2575	OK	20.7407	10.0604	31.4211	OK	14.6752	4.2742	25.0763	OK
ENSG00000058799	-	-	ENSG00000058799	YIPF1	-	1:54317391-54356407	-	-	6.01576	3.15283	8.87868	OK	3.54105	1.61917	5.46292	OK	4.70468	2.28713	7.12223	OK	5.07884	2.79479	7.3629	OK
ENSG00000058804	-	-	ENSG00000058804	NDC1	-	1:54231132-54304533	-	-	9.75323	5.79842	13.708	OK	7.65268	5.05797	10.2474	OK	10.9345	6.18086	15.6881	OK	6.29894	3.53056	9.06732	OK
ENSG00000058866	-	-	ENSG00000058866	DGKG	-	3:185764096-186080026	-	-	9.63165e-25	0	2.24947	OK	0.0406186	0	2.56744	OK	1.35094	0	6.98912	OK	0.00855954	0	2.45428	OK
ENSG00000059122	-	-	ENSG00000059122	FLYWCH1	-	16:2961937-3004277	-	-	16.0995	6.49223	25.7067	OK	10.9326	2.36179	19.5033	OK	12.738	4.57288	20.9032	OK	12.2155	3.10444	21.3266	OK
ENSG00000059145	-	-	ENSG00000059145	UNKL	-	16:1401923-1464752	-	-	8.23759	0	19.0029	OK	7.15929	1.11921	13.1994	OK	6.16463	0.42684	11.9024	OK	5.93545	0	11.9857	OK
ENSG00000059377	-	-	ENSG00000059377	TBXAS1	-	7:139246315-139720125	-	-	1.17858	0	4.76832	OK	1.33495	0	5.39752	OK	1.05651	0	5.00073	OK	0.526101	0	3.50715	OK
ENSG00000059378	-	-	ENSG00000059378	PARP12	-	7:139723543-139763521	-	-	28.3187	16.9504	39.687	OK	16.992	10.4989	23.4852	OK	13.4987	8.05364	18.9437	OK	17.1594	10.6826	23.6362	OK
ENSG00000059573	-	-	ENSG00000059573	ALDH18A1	-	10:97365695-97416463	-	-	15.1328	9.93923	20.3264	OK	14.2928	8.16218	20.4235	OK	23.0323	13.1024	32.9622	OK	21.2589	13.9305	28.5872	OK
ENSG00000059588	-	-	ENSG00000059588	TARBP1	-	1:234527058-234614849	-	-	8.51451	1.85545	15.1736	OK	5.04891	2.18423	7.91358	OK	4.4588	0.434491	8.4831	OK	4.86344	1.59592	8.13095	OK
ENSG00000059691	-	-	ENSG00000059691	PET112	-	4:152591655-152682175	-	-	6.28523	3.59933	8.97114	OK	6.8453	4.13336	9.55724	OK	6.17145	3.73335	8.60956	OK	5.49176	3.2637	7.71981	OK
ENSG00000059728	-	-	ENSG00000059728	MXD1	-	2:70120691-70170077	-	-	2.53607	0.605962	4.46618	OK	7.53584	3.50504	11.5666	OK	6.10334	3.11227	9.0944	OK	2.75818	0.636769	4.87959	OK
ENSG00000059758	-	-	ENSG00000059758	CDK17	-	12:96672038-96794338	-	-	33.5075	22.1249	44.89	OK	62.2746	38.5576	85.9916	OK	45.578	26.9611	64.195	OK	27.5073	17.069	37.9456	OK
ENSG00000059769	-	-	ENSG00000059769	DNAJC25	-	9:114393631-114432526	-	-	4.89344	1.11834	8.66855	OK	3.89081	0.77859	7.00303	OK	6.25406	3.06584	9.44228	OK	6.22522	1.91027	10.5402	OK
ENSG00000059804	-	-	ENSG00000059804	SLC2A3	-	12:8071825-8088871	-	-	6.71647	2.37838	11.0546	OK	9.73686	3.52166	15.9521	OK	12.1603	3.42907	20.8915	OK	11.5381	4.59292	18.4832	OK
ENSG00000059915	-	-	ENSG00000059915	PSD	-	10:104162375-104182893	-	-	0.176104	0	1.56366	OK	0	0	0	OK	0.0416007	0	1.33959	OK	0.0680879	0	1.37302	OK
ENSG00000060069	-	-	ENSG00000060069	CTDP1	-	18:77439800-77514510	-	-	4.97962	2.55961	7.39964	OK	4.38781	2.17781	6.59781	OK	5.83712	2.54697	9.12727	OK	6.15527	2.51422	9.79632	OK
ENSG00000060138	-	-	ENSG00000060138	YBX3	-	12:10851682-10875911	-	-	216.519	150.735	282.302	OK	248.984	133.834	364.133	OK	242.135	173.739	310.531	OK	243.891	157.535	330.247	OK
ENSG00000060140	-	-	ENSG00000060140	STYK1	-	12:10771537-10826917	-	-	3.31404	1.05676	5.57132	OK	3.65692	0.66022	6.65362	OK	1.65701	0	3.73488	OK	1.70419	0	3.81966	OK
ENSG00000060237	-	-	ENSG00000060237	WNK1	-	12:861758-1020618	-	-	18.9229	1.21549	36.6303	OK	18.0849	0	48.9271	OK	18.5602	5.95617	31.1642	OK	14.5318	0	29.3501	OK
ENSG00000060303	-	-	ENSG00000060303	RPS17P5	-	6:50824967-50825375	-	-	0	0	0	OK	0.388534	0	1.40244	OK	0	0	0	OK	0.130298	0	0.85883	OK
ENSG00000060339	-	-	ENSG00000060339	CCAR1	-	10:70480768-70552134	-	-	46.5188	22.9332	70.1044	OK	46.1359	21.8087	70.463	OK	44.8952	18.8228	70.9676	OK	47.0204	20.8163	73.2244	OK
ENSG00000060491	-	-	ENSG00000060491	OGFR	-	20:61431978-61445352	-	-	6.6428	4.113	9.1726	OK	4.24681	2.13648	6.35713	OK	5.48664	3.31479	7.6585	OK	6.17481	3.88132	8.4683	OK
ENSG00000060558	-	-	ENSG00000060558	GNA15	-	19:3136190-3163767	-	-	0.902774	0	2.62221	OK	0.277791	0	1.31079	OK	0.153563	0	0.997105	OK	0.359103	0	1.65571	OK
ENSG00000060566	-	-	ENSG00000060566	CREB3L3	-	19:4153597-4173051	-	-	0	0	0	OK	0	0	0	OK	0	0	0	OK	0	0	0	OK
ENSG00000060642	-	-	ENSG00000060642	PIGV	-	1:27113962-27124889	-	-	2.52066	0.6084	4.43292	OK	1.82871	0.144415	3.513	OK	3.0119	0.608199	5.4156	OK	2.07183	0.0190973	4.12456	OK
ENSG00000060656	-	-	ENSG00000060656	PTPRU	-	1:29563027-29653325	-	-	1.26781	0	3.45779	OK	0.854951	0	2.60151	OK	2.42911	0	6.2744	OK	1.06843	0	3.2842	OK
ENSG00000060688	-	-	ENSG00000060688	SNRNP40	-	1:31732416-31769662	-	-	17.8319	11.9476	23.7162	OK	13.475	9.23113	17.719	OK	15.0225	10.2869	19.7582	OK	15.5831	10.8352	20.331	OK
ENSG00000060709	-	-	ENSG00000060709	RIMBP2	-	12:130880681-131200826	-	-	0	0	0	OK	0	0	0	OK	0	0	0	OK	0	0	0	OK
ENSG00000060718	-	-	ENSG00000060718	COL11A1	-	1:103342022-103574052	-	-	0	0	0	OK	0	0	0	OK	0	0	0	OK	0.0160427	0	1.67331	OK
ENSG00000060749	-	-	ENSG00000060749	QSER1	-	11:32914723-33014862	-	-	7.39983	0	16.8153	OK	7.46343	0	16.6974	OK	9.34337	0	20.0634	OK	5.7986	1.40198	10.1952	OK
ENSG00000060762	-	-	ENSG00000060762	MPC1	-	6:166778406-166796486	-	-	21.8259	14.5309	29.121	OK	26.8516	18.3668	35.3364	OK	24.4859	16.8974	32.0745	OK	33.421	23.8306	43.0114	OK
ENSG00000060971	-	-	ENSG00000060971	ACAA1	-	3:38080695-38178733	-	-	12.7765	7.74331	17.8097	OK	7.78975	4.29447	11.285	OK	12.4901	7.63826	17.342	OK	15.0046	9.31416	20.6951	OK
ENSG00000060982	-	-	ENSG00000060982	BCAT1	-	12:24964294-25113092	-	-	52.3966	37.5234	67.2698	OK	50.1994	37.4905	62.9083	OK	54.7064	39.1367	70.2761	OK	45.3142	33.0988	57.5297	OK
ENSG00000061273	-	-	ENSG00000061273	HDAC7	-	12:48099867-48231681	-	-	39.9758	21.9681	57.9835	OK	36.6354	18.0447	55.2262	OK	39.0422	21.5447	56.5397	OK	46.2247	26.9223	65.5271	OK
ENSG00000061337	-	-	ENSG00000061337	LZTS1	-	8:20103675-20161474	-	-	0.0317178	0	0.273368	OK	0.00566434	0	0.235951	OK	0.0076524	0	0.240257	OK	0	0	0	OK
ENSG00000061455	-	-	ENSG00000061455	PRDM6	-	5:122422942-122529960	-	-	0.0184426	0	1.61818	OK	0	0	0	OK	0.0087416	0	1.61366	OK	0.0106547	0	1.61932	OK
ENSG00000061492	-	-	ENSG00000061492	WNT8A	-	5:137419580-137428054	-	-	0	0	0	OK	0	0	0	OK	0	0	0	OK	0	0	0	OK
ENSG00000061656	-	-	ENSG00000061656	SPAG4	-	20:34203813-34208971	-	-	0.41218	0	2.11731	OK	0.937708	0	3.09393	OK	0.566847	0	2.26949	OK	1.62315	0	4.09768	OK
ENSG00000061676	-	-	ENSG00000061676	NCKAP1	-	2:183773842-183903586	-	-	49.3263	37.4774	61.1752	OK	55.9494	39.0603	72.8385	OK	56.0763	38.6399	73.5126	OK	47.1635	32.2517	62.0752	OK
ENSG00000061794	-	-	ENSG00000061794	MRPS35	-	12:27863705-27909228	-	-	28.739	17.5183	39.9596	OK	33.4136	16.5765	50.2508	OK	30.5187	18.5382	42.4992	OK	30.0708	17.7826	42.3591	OK
ENSG00000061918	-	-	ENSG00000061918	GUCY1B3	-	4:156680143-156728743	-	-	1.38973	0.757889	2.02158	OK	1.36049	0.754428	1.96654	OK	3.57768	2.39772	4.75763	OK	1.16912	0.610462	1.72777	OK
ENSG00000061936	-	-	ENSG00000061936	SFSWAP	-	12:132195625-132284282	-	-	15.9509	5.79212	26.1097	OK	15.8981	5.72074	26.0755	OK	13.8735	7.48031	20.2667	OK	14.1586	6.68322	21.634	OK
ENSG00000061938	-	-	ENSG00000061938	TNK2	-	3:195590234-195638816	-	-	10.2898	2.76156	17.818	OK	11.6833	4.27796	19.0886	OK	10.5538	2.53411	18.5735	OK	15.7507	7.04764	24.4537	OK
ENSG00000061987	-	-	ENSG00000061987	MON2	-	12:62860596-62991363	-	-	7.8712	2.55327	13.1891	OK	6.92423	1.76414	12.0843	OK	11.1042	3.81213	18.3963	OK	9.1902	2.73163	15.6488	OK
ENSG00000062038	-	-	ENSG00000062038	CDH3	-	16:68670091-68756519	-	-	0	0	0	OK	0	0	0	OK	0	0	0	OK	0	0	0	OK
ENSG00000062096	-	-	ENSG00000062096	ARSF	-	X:2959511-3030767	-	-	0	0	0	OK	0	0	0	OK	0	0	0	OK	0	0	0	OK
ENSG00000062194	-	-	ENSG00000062194	GPBP1	-	5:56469774-56560506	-	-	39.3488	17.6985	60.9991	OK	36.494	19.8875	53.1005	OK	36.6307	18.2901	54.9712	OK	36.4632	20.2825	52.644	OK
ENSG00000062282	-	-	ENSG00000062282	DGAT2	-	11:75469499-75514460	-	-	0.345734	0	1.86875	OK	0.342756	0	1.5578	OK	0.139881	0	1.3233	OK	0.604952	0	2.16807	OK
ENSG00000062370	-	-	ENSG00000062370	ZNF112	-	19:44830707-44952766	-	-	1.27594	0	2.57265	OK	1.34904	0	2.70586	OK	1.8159	0.318484	3.31331	OK	1.64338	0.0334265	3.25333	OK
ENSG00000062485	-	-	ENSG00000062485	CS	-	12:56665482-56727837	-	-	61.5526	41.2999	81.8053	OK	57.653	38.2293	77.0766	OK	56.0532	36.6523	75.4542	OK	48.1177	30.645	65.5905	OK
ENSG00000062524	-	-	ENSG00000062524	LTK	-	15:41795835-41806085	-	-	0	0	0	OK	0.0953879	0	0.888951	OK	0	0	0	OK	0	0	0	OK
ENSG00000062582	-	-	ENSG00000062582	MRPS24	-	7:43906156-43966010	-	-	13.2279	0	27.054	OK	12.9322	4.99251	20.8719	OK	13.0952	3.9412	22.2493	OK	17.0177	7.13916	26.8963	OK
ENSG00000062598	-	-	ENSG00000062598	ELMO2	-	20:44994687-45087915	-	-	11.2226	5.13165	17.3136	OK	9.91254	5.49824	14.3268	OK	11.1819	5.86382	16.5	OK	11.8898	7.33224	16.4473	OK
ENSG00000062650	-	-	ENSG00000062650	WAPAL	-	10:88195012-88281572	-	-	11.1765	7.47503	14.878	OK	11.7469	7.74848	15.7454	OK	12.7519	8.28586	17.2179	OK	13.0531	5.14892	20.9572	OK
ENSG00000062716	-	-	ENSG00000062716	VMP1	-	17:57697218-57919616	-	-	130.601	47.2613	213.941	OK	136.895	56.1974	217.592	OK	131.513	48.7808	214.245	OK	126.143	53.3413	198.945	OK
ENSG00000062725	-	-	ENSG00000062725	APPBP2	-	17:58520519-58603580	-	-	10.6861	6.22253	15.1497	OK	11.7879	7.52612	16.0497	OK	10.319	6.38861	14.2494	OK	11.1493	6.59778	15.7008	OK
ENSG00000062822	-	-	ENSG00000062822	POLD1	-	19:50887460-50934570	-	-	3.82629	0.845448	6.80714	OK	3.6113	0.489266	6.73333	OK	3.86685	0.727662	7.00603	OK	5.23481	0.984516	9.48511	OK
ENSG00000063015	-	-	ENSG00000063015	SEZ6	-	17:27232267-27384234	-	-	0.145397	0	1.27468	OK	0.0112236	0	1.04362	OK	0.163614	0	1.28788	OK	0.108929	0	1.2666	OK
ENSG00000063046	-	-	ENSG00000063046	EIF4B	-	12:53399941-53458156	-	-	68.5448	47.7368	89.3529	OK	64.2981	39.7922	88.804	OK	67.9217	48.5435	87.2998	OK	63.7641	41.3914	86.1368	OK
ENSG00000063127	-	-	ENSG00000063127	SLC6A16	-	19:49792894-49828482	-	-	2.06826	0	5.1241	OK	0.645486	0	2.46421	OK	0.543592	0	2.51663	OK	0.642099	0	2.58151	OK
ENSG00000063169	-	-	ENSG00000063169	GLTSCR1	-	19:48110780-48246391	-	-	4.11382	0	11.5151	OK	2.96034	0	8.21967	OK	3.01348	0	9.11283	OK	3.58136	0	9.45555	OK
ENSG00000063176	-	-	ENSG00000063176	SPHK2	-	19:49118584-49140695	-	-	3.59162	0	9.2343	OK	2.53709	0	6.36811	OK	3.78116	0	8.95523	OK	3.73918	0	9.58136	OK
ENSG00000063177	-	-	ENSG00000063177	RPL18	-	19:49118584-49140695	-	-	345.099	259.244	430.955	OK	283.331	212.193	354.47	OK	362.806	271.244	454.367	OK	412.827	311.266	514.388	OK
ENSG00000063180	-	-	ENSG00000063180	CA11	-	19:49141198-49184461	-	-	0.675786	0	2.41589	OK	1.45501	0	4.55014	OK	1.60869	0	4.58903	OK	3.03306	0	7.34403	OK
ENSG00000063241	-	-	ENSG00000063241	ISOC2	-	19:55964351-55973710	-	-	19.2351	12.048	26.4222	OK	14.5261	8.49134	20.5609	OK	36.5593	24.5954	48.5232	OK	32.9223	22.1398	43.7047	OK
ENSG00000063244	-	-	ENSG00000063244	U2AF2	-	19:56165511-56186081	-	-	59.9469	40.007	79.8868	OK	50.4498	32.6512	68.2484	OK	54.8475	34.8582	74.8367	OK	45.8125	30.4315	61.1934	OK
ENSG00000063245	-	-	ENSG00000063245	EPN1	-	19:56186591-56249768	-	-	30.9744	19.931	42.0177	OK	23.9681	15.6274	32.3089	OK	29.0344	18.9226	39.1462	OK	32.0872	19.3343	44.8401	OK
ENSG00000063322	-	-	ENSG00000063322	MED29	-	19:39881942-39891277	-	-	9.262	5.23075	13.2932	OK	7.40504	5.03873	9.77135	OK	8.22264	5.4469	10.9984	OK	9.76602	5.5263	14.0057	OK
ENSG00000063438	-	-	ENSG00000063438	AHRR	-	5:271735-438406	-	-	1.3257	0	3.79039	OK	0.883626	0	3.09545	OK	0.531114	0	2.27585	OK	0.807844	0	3.1589	OK
ENSG00000063515	-	-	ENSG00000063515	GSC2	-	22:19136088-19137796	-	-	0	0	0	OK	0	0	0	OK	0	0	0	OK	0	0	0	OK
ENSG00000063587	-	-	ENSG00000063587	ZNF275	-	X:152599612-152625568	-	-	1.54811	0.612309	2.4839	OK	2.51099	1.33896	3.68302	OK	3.49906	2.07952	4.9186	OK	2.87784	1.69657	4.05911	OK
ENSG00000063601	-	-	ENSG00000063601	MTMR1	-	X:149861434-149933576	-	-	3.16296	0.814546	5.51137	OK	3.21902	0.758592	5.67945	OK	3.1842	0.944444	5.42396	OK	2.39756	0.474583	4.32054	OK
ENSG00000063660	-	-	ENSG00000063660	GPC1	-	2:241375087-241407493	-	-	9.35907	3.23432	15.4838	OK	8.64275	4.17867	13.1068	OK	9.16586	4.99431	13.3374	OK	8.70906	4.26248	13.1556	OK
ENSG00000063761	-	-	ENSG00000063761	ADCK1	-	14:78266425-78401355	-	-	2.47847	0.690982	4.26595	OK	1.71879	0.279563	3.15803	OK	2.58198	0.793559	4.3704	OK	2.77738	0.931378	4.62339	OK
ENSG00000063854	-	-	ENSG00000063854	HAGH	-	16:1845620-1934295	-	-	14.7514	6.7437	22.7591	OK	15.2145	7.97442	22.4547	OK	22.6673	12.2201	33.1145	OK	23.9612	13.7888	34.1335	OK
ENSG00000063978	-	-	ENSG00000063978	RNF4	-	4:2420700-2734292	-	-	27.7584	11.1153	44.4016	OK	31.6583	13.3013	50.0154	OK	47.5058	12.5394	82.4721	OK	30.1383	11.0874	49.1891	OK
ENSG00000064012	-	-	ENSG00000064012	CASP8	-	2:202098165-202152434	-	-	1.77316	0	4.44843	OK	1.37684	0	5.04297	OK	4.51526	0	11.9943	OK	1.50242	0	4.54008	OK
ENSG00000064042	-	-	ENSG00000064042	LIMCH1	-	4:41361623-41702061	-	-	6.80754	0.166849	13.4482	OK	11.7112	0	27.7589	OK	7.21834	0.401724	14.035	OK	3.85644	0.34597	7.36692	OK
ENSG00000064102	-	-	ENSG00000064102	ASUN	-	12:27058113-27091259	-	-	15.4193	7.63695	23.2017	OK	13.7702	5.47042	22.0699	OK	7.87738	3.64426	12.1105	OK	6.79237	3.45467	10.1301	OK
ENSG00000064115	-	-	ENSG00000064115	TM7SF3	-	12:27124518-27167367	-	-	33.1276	13.8775	52.3777	OK	36.5682	10.1717	62.9646	OK	38.7073	12.9428	64.4717	OK	28.7567	6.17335	51.34	OK
ENSG00000064195	-	-	ENSG00000064195	DLX3	-	17:48067368-48072588	-	-	0	0	0	OK	0	0	0	OK	0.201484	0	0.765994	OK	0	0	0	OK
ENSG00000064199	-	-	ENSG00000064199	SPA17	-	11:124492731-124567414	-	-	6.9593	0	14.1137	OK	5.14524	0	10.3102	OK	2.94097	0	6.17593	OK	3.67493	0	7.59391	OK
ENSG00000064201	-	-	ENSG00000064201	TSPAN32	-	11:2316874-2339430	-	-	0	0	0	OK	0	0	0	OK	0	0	0	OK	0	0	0	OK
ENSG00000064205	-	-	ENSG00000064205	WISP2	-	20:43285091-43379675	-	-	0.146705	0	0.790421	OK	0.122727	0	0.76215	OK	0	0	0	OK	0.060031	0	0.746695	OK
ENSG00000064218	-	-	ENSG00000064218	DMRT3	-	9:976963-991731	-	-	0	0	0	OK	0	0	0	OK	0	0	0	OK	0	0	0	OK
ENSG00000064225	-	-	ENSG00000064225	ST3GAL6	-	3:98433173-98620533	-	-	25.5525	9.06668	42.0384	OK	27.3772	4.40075	50.3536	OK	30.2634	14.5616	45.9652	OK	39.6957	23.553	55.8383	OK
ENSG00000064270	-	-	ENSG00000064270	ATP2C2	-	16:84402132-84500967	-	-	0	0	0	OK	0.0601648	0	2.42527	OK	0.015381	0	2.89942	OK	0	0	0	OK
ENSG00000064300	-	-	ENSG00000064300	NGFR	-	17:47572654-47661189	-	-	0	0	0	OK	0	0	0	OK	0	0	0	OK	0	0	0	OK
ENSG00000064309	-	-	ENSG00000064309	CDON	-	11:125820010-125933230	-	-	0.438747	0	1.548	OK	0.502546	0	1.86809	OK	0.166701	0	1.24437	OK	0.19431	0	1.25315	OK
ENSG00000064313	-	-	ENSG00000064313	TAF2	-	8:120743014-120845103	-	-	17.8527	6.40226	29.3031	OK	22.4927	8.96468	36.0206	OK	23.891	9.79075	37.9913	OK	17.0901	6.61402	27.5661	OK
ENSG00000064393	-	-	ENSG00000064393	HIPK2	-	7:139246315-139720125	-	-	4.46922	2.19409	6.74436	OK	4.13006	2.75285	5.50726	OK	6.01439	3.98613	8.04264	OK	3.80959	2.65583	4.96334	OK
ENSG00000064419	-	-	ENSG00000064419	TNPO3	-	7:128594947-128695198	-	-	12.2377	9.06989	15.4054	OK	9.62582	7.05413	12.1975	OK	11.1907	8.23212	14.1493	OK	9.93391	7.27768	12.5901	OK
ENSG00000064489	-	-	ENSG00000064489	MEF2BNB-MEF2B	-	19:19256375-19314233	-	-	0.41644	0	2.2802	OK	1.21142	0	3.51278	OK	0.541077	0	2.54803	OK	1.74219	0	4.97952	OK
ENSG00000064490	-	-	ENSG00000064490	RFXANK	-	19:19256375-19314233	-	-	15.5191	8.41799	22.6202	OK	10.2636	4.53954	15.9876	OK	11.2719	5.13127	17.4125	OK	10.8156	4.67186	16.9594	OK
ENSG00000064545	-	-	ENSG00000064545	TMEM161A	-	19:19229977-19249322	-	-	4.06918	0.428417	7.70995	OK	3.39753	0	6.8509	OK	3.63589	0	7.40216	OK	3.78381	0	8.39188	OK
ENSG00000064547	-	-	ENSG00000064547	LPAR2	-	19:19734476-19739739	-	-	1.46269	0	3.70477	OK	4.24142	0	9.56271	OK	1.89795	0	4.6135	OK	4.77762	0	11.3758	OK
ENSG00000064601	-	-	ENSG00000064601	CTSA	-	20:44517263-44540794	-	-	225.612	151.85	299.374	OK	260.27	181.333	339.208	OK	219.244	144.503	293.985	OK	241.187	159.458	322.917	OK
ENSG00000064607	-	-	ENSG00000064607	SUGP2	-	19:19101696-19170563	-	-	6.65158	3.52861	9.77455	OK	5.57568	2.87176	8.27961	OK	5.45041	1.85295	9.04787	OK	5.79972	2.63589	8.96356	OK
ENSG00000064651	-	-	ENSG00000064651	SLC12A2	-	5:127419457-127525380	-	-	27.6257	17.1936	38.0579	OK	39.2029	19.6807	58.7252	OK	90.118	54.1587	126.077	OK	38.7029	23.4667	53.9392	OK
ENSG00000064652	-	-	ENSG00000064652	SNX24	-	5:122179133-122390362	-	-	3.98297	0.333454	7.63249	OK	3.8822	0	8.05596	OK	4.06727	0	8.81411	OK	5.32895	0.103103	10.5548	OK
ENSG00000064655	-	-	ENSG00000064655	EYA2	-	20:45523262-45817492	-	-	0	0	0	OK	0	0	0	OK	0	0	0	OK	0	0	0	OK
ENSG00000064666	-	-	ENSG00000064666	CNN2	-	19:1026297-1039068	-	-	60.9783	41.6853	80.2712	OK	52.4976	36.0451	68.9502	OK	52.6155	37.363	67.8679	OK	47.7664	32.7556	62.7772	OK
ENSG00000064687	-	-	ENSG00000064687	ABCA7	-	19:1040101-1065571	-	-	1.69335	0	4.48235	OK	1.5176	0	4.44004	OK	3.57262	0	8.16199	OK	3.5827	0	8.2643	OK
ENSG00000064692	-	-	ENSG00000064692	SNCAIP	-	5:121646991-121814782	-	-	12.4101	2.40948	22.4107	OK	9.57577	4.42917	14.7224	OK	17.7501	2.64256	32.8576	OK	10.0829	3.97183	16.194	OK
ENSG00000064703	-	-	ENSG00000064703	DDX20	-	1:112025969-112310638	-	-	9.28327	0	19.2753	OK	9.00706	0	19.5687	OK	8.10016	2.22261	13.9777	OK	8.52526	0	17.2528	OK
ENSG00000064726	-	-	ENSG00000064726	BTBD1	-	15:83509837-83772195	-	-	25.1679	13.6266	36.7093	OK	24.9885	14.1734	35.8036	OK	25.2627	15.3643	35.1612	OK	25.4189	15.1152	35.7226	OK
ENSG00000064763	-	-	ENSG00000064763	FAR2	-	12:29302035-29534122	-	-	33.3015	2.84991	63.7531	OK	45.5291	11.7452	79.313	OK	18.793	0	37.9987	OK	29.6845	1.97433	57.3946	OK
ENSG00000064787	-	-	ENSG00000064787	BCAS1	-	20:52553315-52687304	-	-	0.132677	0	0.723304	OK	0.0803707	0	0.676033	OK	0.0690179	0	0.661683	OK	0.0206115	0	0.596227	OK
ENSG00000064835	-	-	ENSG00000064835	POU1F1	-	3:87308553-87325737	-	-	0	0	0	OK	0	0	0	OK	0	0	0	OK	0	0	0	OK
ENSG00000064886	-	-	ENSG00000064886	CHI3L2	-	1:111729795-111786062	-	-	0	0	0	OK	0	0	0	OK	0	0	0	OK	0	0	0	OK
ENSG00000064932	-	-	ENSG00000064932	SBNO2	-	19:1107635-1174282	-	-	8.73989	1.52339	15.9564	OK	9.22782	0	18.7582	OK	11.0518	3.25758	18.8461	OK	7.31495	2.78166	11.8482	OK
ENSG00000064933	-	-	ENSG00000064933	PMS1	-	2:190649106-190742355	-	-	7.86983	3.72564	12.014	OK	5.65278	2.57394	8.73162	OK	8.17195	3.69014	12.6538	OK	7.12885	2.7794	11.4783	OK
ENSG00000064961	-	-	ENSG00000064961	HMG20B	-	19:3506270-3579086	-	-	34.9274	18.2745	51.5803	OK	30.0368	14.1913	45.8822	OK	50.911	23.5894	78.2326	OK	42.8272	19.5108	66.1436	OK
ENSG00000064989	-	-	ENSG00000064989	CALCRL	-	2:187866602-188430487	-	-	73.9123	7.94957	139.875	OK	83.6128	0	169.249	OK	138.17	51.9218	224.417	OK	126.848	45.1412	208.555	OK
ENSG00000064995	-	-	ENSG00000064995	TAF11	-	6:34759856-34855866	-	-	13.274	9.11418	17.4339	OK	10.1595	6.74741	13.5717	OK	13.7737	8.85175	18.6956	OK	12.4217	8.23969	16.6037	OK
ENSG00000064999	-	-	ENSG00000064999	ANKS1A	-	6:34857041-35059179	-	-	4.8713	3.44968	6.29291	OK	3.45133	2.02614	4.87653	OK	4.6759	3.18297	6.16883	OK	3.48737	2.3507	4.62404	OK
ENSG00000065000	-	-	ENSG00000065000	AP3D1	-	19:2100987-2248678	-	-	38.6985	13.0131	64.3839	OK	43.7676	14.8059	72.7292	OK	76.045	29.0051	123.085	OK	42.0577	12.8495	71.2659	OK
ENSG00000065029	-	-	ENSG00000065029	ZNF76	-	6:35226685-35263762	-	-	8.61632	4.23184	13.0008	OK	4.13555	1.19563	7.07548	OK	13.5445	7.5299	19.5591	OK	15.099	7.53233	22.6656	OK
ENSG00000065054	-	-	ENSG00000065054	SLC9A3R2	-	16:2075356-2089027	-	-	7.29968	3.99269	10.6067	OK	5.82217	2.92425	8.72009	OK	19.5497	12.7927	26.3068	OK	24.3066	17.0089	31.6044	OK
ENSG00000065057	-	-	ENSG00000065057	NTHL1	-	16:2089815-2185899	-	-	1.27054	0	4.44241	OK	0.932383	0	2.97345	OK	0.745392	0	3.0536	OK	2.8379	0	6.7163	OK
ENSG00000065060	-	-	ENSG00000065060	UHRF1BP1	-	6:34759856-34855866	-	-	1.51548	0.823758	2.2072	OK	1.3867	0.755965	2.01744	OK	2.7657	1.73587	3.79552	OK	1.77315	0.995351	2.55094	OK
ENSG00000065135	-	-	ENSG00000065135	GNAI3	-	1:110091232-110136975	-	-	59.0976	45.3632	72.8321	OK	68.971	53.1011	84.8408	OK	69.9786	53.8716	86.0856	OK	52.1752	40.0091	64.3414	OK
ENSG00000065150	-	-	ENSG00000065150	IPO5	-	13:98605911-98676551	-	-	29.9846	20.1446	39.8246	OK	27.1358	17.4271	36.8445	OK	32.0919	19.4792	44.7047	OK	26.423	17.3902	35.4558	OK
ENSG00000065154	-	-	ENSG00000065154	OAT	-	10:126085871-126107545	-	-	38.7468	27.281	50.2126	OK	44.6116	30.418	58.8052	OK	53.2145	37.757	68.672	OK	51.215	34.8577	67.5723	OK
ENSG00000065183	-	-	ENSG00000065183	WDR3	-	1:118472342-118727846	-	-	5.41277	0.898204	9.92735	OK	6.52552	0.447649	12.6034	OK	7.46179	0.963253	13.9603	OK	7.35542	2.22511	12.4857	OK
ENSG00000065243	-	-	ENSG00000065243	PKN2	-	1:89003195-89301938	-	-	13.323	5.41571	21.2303	OK	14.8939	4.8306	24.9572	OK	12.7051	5.71887	19.6914	OK	15.3101	5.38537	25.2347	OK
ENSG00000065268	-	-	ENSG00000065268	WDR18	-	19:983173-994569	-	-	23.688	11.2497	36.1262	OK	24.611	8.55158	40.6704	OK	36.6922	18.1352	55.2492	OK	27.2645	14.1903	40.3387	OK
ENSG00000065308	-	-	ENSG00000065308	TRAM2	-	6:52285105-52441713	-	-	43.8076	33.6171	53.9982	OK	37.2395	28.4796	45.9993	OK	27.4953	20.7926	34.198	OK	23.363	17.5747	29.1513	OK
ENSG00000065320	-	-	ENSG00000065320	NTN1	-	17:8924858-9147317	-	-	0.0412147	0	0.54171	OK	0.11686	0	0.670039	OK	0.421491	0	1.03826	OK	0.12559	0	0.716654	OK
ENSG00000065325	-	-	ENSG00000065325	GLP2R	-	17:9725522-9795419	-	-	0	0	0	OK	0	0	0	OK	0	0	0	OK	0	0	0	OK
ENSG00000065328	-	-	ENSG00000065328	MCM10	-	10:13203553-13253104	-	-	3.10242	0.223217	5.98163	OK	2.25239	0	4.82613	OK	2.12473	0.234337	4.01512	OK	0.864206	0	2.1374	OK
ENSG00000065357	-	-	ENSG00000065357	DGKA	-	12:56295196-56347811	-	-	62.7032	12.3626	113.044	OK	43.5621	8.72683	78.3973	OK	75.1361	20.9247	129.348	OK	61.5509	16.9997	106.102	OK
ENSG00000065361	-	-	ENSG00000065361	ERBB3	-	12:56473640-56507691	-	-	0.0313792	0	2.9989	OK	0.0235975	0	2.9706	OK	0.0663944	0	3.02158	OK	0.288489	0	3.54598	OK
ENSG00000065371	-	-	ENSG00000065371	ROPN1	-	3:123687367-123711025	-	-	0	0	0	OK	0	0	0	OK	0	0	0	OK	0	0	0	OK
ENSG00000065413	-	-	ENSG00000065413	ANKRD44	-	2:197831740-198175897	-	-	1.98261	0	5.50888	OK	3.78996	0	7.7055	OK	1.17285	0	4.24915	OK	0.634961	0	3.76251	OK
ENSG00000065427	-	-	ENSG00000065427	KARS	-	16:75661621-75795770	-	-	163.765	89.8876	237.643	OK	171.786	95.1318	248.439	OK	123.592	69.4507	177.732	OK	118.208	71.4799	164.937	OK
ENSG00000065457	-	-	ENSG00000065457	ADAT1	-	16:75562429-75657198	-	-	23.412	2.37876	44.4453	OK	17.7791	0	39.7457	OK	17.0536	0	37.8897	OK	21.8174	0.0257228	43.6091	OK
ENSG00000065485	-	-	ENSG00000065485	PDIA5	-	3:122785908-122992977	-	-	28.4583	17.0374	39.8792	OK	24.7973	17.1827	32.4119	OK	34.3854	22.5768	46.194	OK	39.9032	29.4738	50.3325	OK
ENSG00000065491	-	-	ENSG00000065491	TBC1D22B	-	6:37179955-37300746	-	-	4.33569	2.63393	6.03744	OK	5.05126	2.88362	7.21889	OK	4.83296	2.91988	6.74605	OK	3.30392	1.87518	4.73266	OK
ENSG00000065518	-	-	ENSG00000065518	NDUFB4	-	3:120315155-120321347	-	-	54.484	37.5106	71.4573	OK	43.1764	28.0781	58.2747	OK	42.6367	28.1246	57.1487	OK	49.8845	33.9712	65.7977	OK
ENSG00000065526	-	-	ENSG00000065526	SPEN	-	1:16160559-16266955	-	-	5.28622	1.38078	9.19167	OK	5.38006	1.66901	9.09112	OK	5.27967	3.0337	7.52565	OK	5.95144	0	12.8277	OK
ENSG00000065534	-	-	ENSG00000065534	MYLK	-	3:123304388-123603178	-	-	3.97642	0	8.03877	OK	2.7055	0	6.69237	OK	3.67602	0	9.70193	OK	3.58439	0	9.18454	OK
ENSG00000065548	-	-	ENSG00000065548	ZC3H15	-	2:187350882-187374090	-	-	38.5288	22.1293	54.9283	OK	51.4968	30.6387	72.3549	OK	42.9133	26.5094	59.3172	OK	39.6861	24.2414	55.1307	OK
ENSG00000065559	-	-	ENSG00000065559	MAP2K4	-	17:11901669-12047147	-	-	7.76005	4.45292	11.0672	OK	9.14015	5.55782	12.7225	OK	10.3672	5.40114	15.3332	OK	8.39497	4.89698	11.893	OK
ENSG00000065600	-	-	ENSG00000065600	TMEM206	-	1:212537272-212588243	-	-	4.89606	2.22322	7.56891	OK	4.91541	2.13911	7.69171	OK	8.28881	3.70024	12.8774	OK	6.68138	3.69882	9.66395	OK
ENSG00000065609	-	-	ENSG00000065609	SNAP91	-	6:84262598-84419410	-	-	0.32837	0	2.74245	OK	0.243412	0	2.65495	OK	0.103376	0	3.53011	OK	0.0727403	0	2.54248	OK
ENSG00000065613	-	-	ENSG00000065613	SLK	-	10:105726958-105788991	-	-	18.4427	7.31782	29.5675	OK	18.8728	5.53673	32.2088	OK	11.4131	2.82751	19.9987	OK	9.29463	4.02207	14.5672	OK
ENSG00000065615	-	-	ENSG00000065615	CYB5R4	-	6:84569361-84677143	-	-	3.76943	0	7.9576	OK	3.06292	0.148147	5.97769	OK	4.16475	1.37368	6.95581	OK	2.26457	0.448796	4.08035	OK
ENSG00000065618	-	-	ENSG00000065618	COL17A1	-	10:105791043-105845760	-	-	0.213196	0	1.55256	OK	0.323671	0	1.60644	OK	0.102062	0	1.30352	OK	0.0615207	0	1.27369	OK
ENSG00000065621	-	-	ENSG00000065621	GSTO2	-	10:106028630-106064703	-	-	0.0583028	0	1.19146	OK	0.177729	0	1.37449	OK	0.165836	0	1.45525	OK	0.142018	0	1.52739	OK
ENSG00000065665	-	-	ENSG00000065665	SEC61A2	-	10:12171635-12292588	-	-	3.72188	0	8.90969	OK	3.89937	0	8.78738	OK	3.68459	0	8.94476	OK	3.23627	0	8.83698	OK
ENSG00000065675	-	-	ENSG00000065675	PRKCQ	-	10:6469104-6622263	-	-	0.347016	0.0169397	0.677092	OK	0.129943	0	0.324235	OK	0.0939444	0	0.293181	OK	0.124278	0	0.332047	OK
ENSG00000065717	-	-	ENSG00000065717	TLE2	-	19:2997635-3047633	-	-	12.6054	4.44382	20.767	OK	12.0678	4.81087	19.3247	OK	10.2194	2.58839	17.8505	OK	10.6922	3.33597	18.0484	OK
ENSG00000065802	-	-	ENSG00000065802	ASB1	-	2:239335382-239360891	-	-	3.89581	0	7.93534	OK	3.17778	0.375679	5.97987	OK	3.78916	0	7.65817	OK	4.22011	0	8.52825	OK
ENSG00000065809	-	-	ENSG00000065809	FAM107B	-	10:14560555-14816896	-	-	79.6791	34.8757	124.482	OK	92.087	45.5834	138.591	OK	63.5319	30.7024	96.3613	OK	49.7089	28.6071	70.8106	OK
ENSG00000065833	-	-	ENSG00000065833	ME1	-	6:83920107-84140797	-	-	17.8639	13.1519	22.5758	OK	17.7084	13.254	22.1629	OK	18.2955	13.6379	22.953	OK	14.6319	10.7269	18.5368	OK
ENSG00000065882	-	-	ENSG00000065882	TBC1D1	-	4:37892707-38140796	-	-	38.4602	20.7413	56.1791	OK	28.8517	13.3594	44.3441	OK	31.7604	19.1991	44.3218	OK	30.16	14.539	45.781	OK
ENSG00000065883	-	-	ENSG00000065883	CDK13	-	7:39989635-40136733	-	-	15.3331	8.6566	22.0096	OK	11.8519	6.98888	16.7148	OK	12.2181	7.48497	16.9511	OK	11.7288	5.39327	18.0642	OK
ENSG00000065911	-	-	ENSG00000065911	MTHFD2	-	2:74425688-74621009	-	-	10.5336	2.51808	18.5491	OK	18.7099	7.93919	29.4806	OK	55.807	33.8869	77.7271	OK	17.1417	6.70012	27.5833	OK
ENSG00000065923	-	-	ENSG00000065923	SLC9A7	-	X:46464752-46618490	-	-	2.79703	0	6.05247	OK	2.25339	0	5.0061	OK	4.1212	0.689379	7.55302	OK	2.43349	0.302395	4.56459	OK
ENSG00000065970	-	-	ENSG00000065970	FOXJ2	-	12:8185298-8208099	-	-	2.87026	1.79101	3.9495	OK	3.81894	2.58672	5.05115	OK	3.50076	2.30162	4.6999	OK	2.63511	1.53723	3.733	OK
ENSG00000065978	-	-	ENSG00000065978	YBX1	-	1:43148097-43168020	-	-	252.644	194.689	310.599	OK	248.713	191.548	305.878	OK	254.477	196.289	312.666	OK	238.198	183.641	292.754	OK
ENSG00000065989	-	-	ENSG00000065989	PDE4A	-	19:10501809-10580305	-	-	2.50615	0	6.12138	OK	1.58348	0	3.90661	OK	1.34883	0	3.72634	OK	1.31156	0	4.63076	OK
ENSG00000066027	-	-	ENSG00000066027	PPP2R5A	-	1:212458878-212535200	-	-	36.8806	27.3288	46.4325	OK	28.6026	21.4109	35.7942	OK	25.5079	19.0359	31.9798	OK	27.8937	20.796	34.9915	OK
ENSG00000066032	-	-	ENSG00000066032	CTNNA2	-	2:79384131-80875905	-	-	0	0	0	OK	0	0	0	OK	0	0	0	OK	0	0	0	OK
ENSG00000066044	-	-	ENSG00000066044	ELAVL1	-	19:8023462-8070543	-	-	30.4831	21.56	39.4063	OK	30.515	21.4667	39.5633	OK	31.3509	22.3558	40.346	OK	27.4831	19.7328	35.2333	OK
ENSG00000066056	-	-	ENSG00000066056	TIE1	-	1:43766663-43788779	-	-	140.966	90.7712	191.16	OK	118.827	71.733	165.921	OK	137.465	92.6317	182.299	OK	173.853	117.133	230.573	OK
ENSG00000066084	-	-	ENSG00000066084	DIP2B	-	12:50898767-51142450	-	-	9.73967	5.51112	13.9682	OK	9.33618	6.70452	11.9678	OK	9.13994	6.34842	11.9315	OK	8.34249	5.76707	10.9179	OK
ENSG00000066117	-	-	ENSG00000066117	SMARCD1	-	12:50478754-50494495	-	-	22.7411	14.7663	30.7158	OK	17.8279	11.527	24.1288	OK	28.3982	16.3737	40.4227	OK	23.3194	13.9828	32.656	OK
ENSG00000066135	-	-	ENSG00000066135	KDM4A	-	1:44115828-44396831	-	-	8.06227	4.6384	11.4861	OK	7.81536	4.04485	11.5859	OK	11.2107	3.07302	19.3484	OK	6.42755	3.60739	9.2477	OK
ENSG00000066136	-	-	ENSG00000066136	NFYC	-	1:41156051-41237275	-	-	14.1984	6.69995	21.6969	OK	15.1115	7.51127	22.7117	OK	17.3078	8.29472	26.321	OK	15.4653	8.00439	22.9262	OK
ENSG00000066185	-	-	ENSG00000066185	ZMYND12	-	1:42895999-43120335	-	-	0	0	0	OK	0.230166	0	1.29636	OK	0.149513	0	1.21547	OK	0.332166	0	1.74438	OK
ENSG00000066230	-	-	ENSG00000066230	SLC9A3	-	5:473350-524447	-	-	0	0	0	OK	0.151655	0	0.83673	OK	0	0	0	OK	0.0347143	0	0.646692	OK
ENSG00000066248	-	-	ENSG00000066248	NGEF	-	2:233562008-233880595	-	-	0	0	0	OK	0	0	0	OK	0.105609	0	1.98247	OK	0.0913637	0	1.87114	OK
ENSG00000066279	-	-	ENSG00000066279	ASPM	-	1:197053257-197115824	-	-	9.81173	6.98354	12.6399	OK	7.23638	5.08601	9.38675	OK	8.16195	5.82655	10.4974	OK	6.33016	3.50872	9.1516	OK
ENSG00000066294	-	-	ENSG00000066294	CD84	-	1:160506862-160549306	-	-	0.0358845	0	1.01779	OK	0.0651185	0	0.918931	OK	0.0766344	0	0.929624	OK	0.0837101	0	0.943719	OK
ENSG00000066322	-	-	ENSG00000066322	ELOVL1	-	1:43829067-43833696	-	-	74.0423	53.2342	94.8504	OK	67.3553	47.9882	86.7225	OK	75.5946	54.9144	96.2749	OK	95.1558	68.7758	121.536	OK
ENSG00000066336	-	-	ENSG00000066336	SPI1	-	11:47376410-47400127	-	-	0	0	0	OK	0	0	0	OK	0	0	0	OK	0.0713342	0	0.814226	OK
ENSG00000066379	-	-	ENSG00000066379	ZNRD1	-	6:29968787-30032686	-	-	4.78906	0.929453	8.64868	OK	7.18772	2.25194	12.1235	OK	5.76898	1.33142	10.2065	OK	10.3015	3.05752	17.5455	OK
ENSG00000066382	-	-	ENSG00000066382	MPPED2	-	11:30406039-30652055	-	-	0	0	0	OK	0.0129989	0	1.54835	OK	0.00529873	0	1.53799	OK	0	0	0	OK
ENSG00000066405	-	-	ENSG00000066405	CLDN18	-	3:137717576-137752494	-	-	0.0713426	0	0.325729	OK	0	0	0	OK	0.0383259	0	0.264759	OK	0.0422057	0	0.243278	OK
ENSG00000066422	-	-	ENSG00000066422	ZBTB11	-	3:101367732-101398061	-	-	2.58573	1.36769	3.80378	OK	5.09816	0.339776	9.85654	OK	6.12925	1.26518	10.9933	OK	2.93813	0.904631	4.97163	OK
ENSG00000066427	-	-	ENSG00000066427	ATXN3	-	14:92524895-92572965	-	-	14.4703	5.67238	23.2681	OK	13.6999	6.82944	20.5703	OK	8.99075	4.05586	13.9256	OK	11.7318	6.03322	17.4303	OK
ENSG00000066455	-	-	ENSG00000066455	GOLGA5	-	14:93260575-93306308	-	-	12.7072	7.59683	17.8175	OK	16.5861	9.07517	24.097	OK	22.2513	13.223	31.2795	OK	17.1079	9.77004	24.4458	OK
ENSG00000066468	-	-	ENSG00000066468	FGFR2	-	10:123237847-123357972	-	-	0.0423933	0	1.92062	OK	0.00800264	0	1.86263	OK	0.0708479	0	1.5309	OK	0.0176343	0	1.89097	OK
ENSG00000066557	-	-	ENSG00000066557	LRRC40	-	1:70034080-70671303	-	-	8.40001	5.91139	10.8886	OK	8.66383	6.12124	11.2064	OK	7.63631	5.32716	9.94546	OK	7.22245	4.98304	9.46186	OK
ENSG00000066583	-	-	ENSG00000066583	ISOC1	-	5:128430443-128449721	-	-	9.45827	6.04922	12.8673	OK	9.71278	6.24225	13.1833	OK	11.6691	7.70338	15.6348	OK	8.57545	5.34311	11.8078	OK
ENSG00000066629	-	-	ENSG00000066629	EML1	-	14:100204029-100408397	-	-	10.314	4.06329	16.5647	OK	7.40825	2.90801	11.9085	OK	11.5356	0	24.0988	OK	10.3142	1.65376	18.9747	OK
ENSG00000066651	-	-	ENSG00000066651	TRMT11	-	6:126307575-126360422	-	-	0.961045	0	3.21116	OK	1.7986	0	6.96281	OK	3.5246	0	8.00558	OK	1.72636	0	4.00777	OK
ENSG00000066654	-	-	ENSG00000066654	THUMPD1	-	16:20621564-20936328	-	-	13.4639	7.61851	19.3093	OK	12.8844	6.32301	19.4457	OK	11.6842	7.49952	15.8689	OK	10.6338	6.85939	14.4082	OK
ENSG00000066697	-	-	ENSG00000066697	MSANTD3	-	9:103189437-103339918	-	-	45.8748	29.0241	62.7255	OK	57.7651	38.7831	76.7471	OK	47.0201	31.7003	62.3399	OK	32.1306	21.3016	42.9596	OK
ENSG00000066735	-	-	ENSG00000066735	KIF26A	-	14:104605059-104647231	-	-	0.728556	0.253747	1.20337	OK	0.95355	0.422572	1.48453	OK	1.73253	0.915304	2.54976	OK	1.65868	0.886621	2.43075	OK
ENSG00000066739	-	-	ENSG00000066739	ATG2B	-	14:96747594-96853625	-	-	2.74606	0	5.91706	OK	3.62786	0	7.46134	OK	4.69715	0.129809	9.2645	OK	3.10814	0	7.73412	OK
ENSG00000066777	-	-	ENSG00000066777	ARFGEF1	-	8:67876333-68255912	-	-	14.8793	3.01747	26.7411	OK	12.725	1.2178	24.2322	OK	19.4109	3.45885	35.363	OK	13.3847	2.59451	24.1748	OK
ENSG00000066813	-	-	ENSG00000066813	ACSM2B	-	16:20547547-20587749	-	-	0	0	0	OK	0.0334346	0	2.64517	OK	0	0	0	OK	0.0104968	0	2.61778	OK
ENSG00000066827	-	-	ENSG00000066827	ZFAT	-	8:135490030-135725292	-	-	5.1489	2.12039	8.17742	OK	2.36735	0	4.88047	OK	3.62147	1.0588	6.18415	OK	3.49058	1.13549	5.84566	OK
ENSG00000066855	-	-	ENSG00000066855	MTFR1	-	8:66556968-66754557	-	-	12.6308	4.58648	20.6751	OK	9.14176	3.18957	15.0939	OK	16.6728	7.71156	25.634	OK	9.89165	4.16511	15.6182	OK
ENSG00000066923	-	-	ENSG00000066923	STAG3	-	7:99775185-99869855	-	-	2.87121	0.248878	5.49354	OK	2.63875	0	5.91907	OK	2.21466	0	4.50466	OK	1.95649	0	4.61885	OK
ENSG00000066926	-	-	ENSG00000066926	FECH	-	18:55215514-55254004	-	-	11.9241	5.01519	18.8331	OK	12.1353	2.29391	21.9767	OK	11.8688	5.1727	18.5648	OK	8.0245	1.98994	14.0591	OK
ENSG00000066933	-	-	ENSG00000066933	MYO9A	-	15:72110736-72447800	-	-	7.49282	0	30.0604	OK	4.02827	0	19.5138	OK	3.91658	0	8.73506	OK	3.04822	0	7.69408	OK
ENSG00000067048	-	-	ENSG00000067048	DDX3Y	-	Y:15016018-15032390	-	-	0	0	0	OK	0.0301145	0	1.68651	OK	0	0	0	OK	0	0	0	OK
ENSG00000067057	-	-	ENSG00000067057	PFKP	-	10:3108524-3179904	-	-	72.299	54.4345	90.1634	OK	71.0707	48.9846	93.1569	OK	66.0118	43.9706	88.053	OK	71.2925	45.1521	97.4329	OK
ENSG00000067064	-	-	ENSG00000067064	IDI1	-	10:1034337-1095110	-	-	27.6808	15.6836	39.6781	OK	42.7254	25.5342	59.9167	OK	59.7017	38.3823	81.021	OK	37.3008	22.2987	52.3028	OK
ENSG00000067066	-	-	ENSG00000067066	SP100	-	2:231280656-231444721	-	-	63.9714	40.1566	87.7861	OK	50.3277	31.3934	69.262	OK	48.3372	30.0014	66.6729	OK	40.2517	25.8575	54.6458	OK
ENSG00000067082	-	-	ENSG00000067082	KLF6	-	10:3818187-3827473	-	-	104.885	76.0746	133.696	OK	122.556	83.4718	161.64	OK	68.4921	47.6027	89.3814	OK	102.3	66.4538	138.147	OK
ENSG00000067113	-	-	ENSG00000067113	PPAP2A	-	5:54603587-54830878	-	-	9.35658	0	18.9836	OK	7.66293	0	16.2007	OK	28.0627	12.3161	43.8093	OK	16.4732	6.49261	26.4538	OK
ENSG00000067141	-	-	ENSG00000067141	NEO1	-	15:73344050-73597547	-	-	0.0678614	0	1.97557	OK	0.853152	0	2.98354	OK	0.415381	0	2.16107	OK	0.169348	0	1.82093	OK
ENSG00000067167	-	-	ENSG00000067167	TRAM1	-	8:71485676-71520622	-	-	61.3456	41.5519	81.1393	OK	62.2675	43.3948	81.1403	OK	105.393	73.3251	137.46	OK	81.2201	53.8547	108.586	OK
ENSG00000067177	-	-	ENSG00000067177	PHKA1	-	X:71798663-71934167	-	-	1.06222	0.537995	1.58644	OK	0.662459	0.333732	0.991185	OK	0.792128	0.404223	1.18003	OK	0.738336	0.355741	1.12093	OK
ENSG00000067182	-	-	ENSG00000067182	TNFRSF1A	-	12:6437922-6451280	-	-	23.6177	15.4363	31.7991	OK	22.1714	14.3926	29.9501	OK	23.2342	13.9943	32.474	OK	22.789	15.2431	30.3349	OK
ENSG00000067191	-	-	ENSG00000067191	CACNB1	-	17:37329542-37353956	-	-	4.07677	0	8.52576	OK	1.16027	0	3.26576	OK	2.02049	0	6.05909	OK	1.70745	0	4.24814	OK
ENSG00000067208	-	-	ENSG00000067208	EVI5	-	1:92974252-93257961	-	-	6.82138	1.17662	12.4661	OK	10.6763	0.910454	20.4422	OK	10.3875	0.28976	20.4852	OK	7.18795	0.219615	14.1563	OK
ENSG00000067221	-	-	ENSG00000067221	STOML1	-	15:74275546-74286963	-	-	0.432561	0	1.927	OK	1.0617	0	3.59772	OK	1.88988	0	4.93328	OK	1.71151	0	4.50202	OK
ENSG00000067225	-	-	ENSG00000067225	PKM	-	15:72491369-72524164	-	-	281.379	205.304	357.453	OK	263.241	197.631	328.851	OK	303.427	225.212	381.642	OK	305.361	222.471	388.252	OK
ENSG00000067248	-	-	ENSG00000067248	DHX29	-	5:54529761-54603550	-	-	11.0424	4.30285	17.7819	OK	13.2998	2.34939	24.2502	OK	10.1583	7.28731	13.0294	OK	9.26046	3.9258	14.5951	OK
ENSG00000067334	-	-	ENSG00000067334	DNTTIP2	-	1:94333372-94345474	-	-	20.7933	11.5835	30.003	OK	16.8183	9.83345	23.8032	OK	16.6979	9.02224	24.3736	OK	16.0199	10.1664	21.8735	OK
ENSG00000067365	-	-	ENSG00000067365	METTL22	-	16:8715539-8740081	-	-	19.9725	10.5137	29.4314	OK	17.9841	8.56436	27.4039	OK	23.2691	12.8198	33.7184	OK	16.1871	7.19577	25.1785	OK
ENSG00000067369	-	-	ENSG00000067369	TP53BP1	-	15:43699406-43802926	-	-	12.1872	4.58149	19.7929	OK	11.1138	2.52377	19.7038	OK	19.7451	5.48462	34.0056	OK	15.4328	5.89494	24.9706	OK
ENSG00000067445	-	-	ENSG00000067445	TRO	-	X:54946894-54957864	-	-	4.08996	0	8.26526	OK	0.568496	0	3.25312	OK	0.752987	0	3.59811	OK	2.07611	0	5.28823	OK
ENSG00000067533	-	-	ENSG00000067533	RRP15	-	1:218458628-218511325	-	-	8.60071	2.89877	14.3027	OK	11.2377	4.07821	18.3972	OK	12.9398	4.66385	21.2158	OK	8.35814	3.44718	13.2691	OK
ENSG00000067560	-	-	ENSG00000067560	RHOA	-	3:49396577-49453908	-	-	263.201	202.789	323.614	OK	234.45	180.226	288.675	OK	260.439	200.632	320.246	OK	277.261	212.411	342.112	OK
ENSG00000067596	-	-	ENSG00000067596	DHX8	-	17:41561232-41687706	-	-	10.8666	0.523684	21.2096	OK	6.7834	0	14.1741	OK	7.74762	2.18736	13.3079	OK	9.47821	0.55466	18.4018	OK
ENSG00000067601	-	-	ENSG00000067601	PMS2P4	-	7:66752527-66786513	-	-	0.179269	0	1.32128	OK	0.739926	0	2.47249	OK	0.512987	0	2.0429	OK	0.227705	0	1.36703	OK
ENSG00000067606	-	-	ENSG00000067606	PRKCZ	-	1:1981908-2152177	-	-	0.852617	0	3.83608	OK	0.194266	0	3.07123	OK	1.48842	0	5.07841	OK	0.610195	0	4.20122	OK
ENSG00000067646	-	-	ENSG00000067646	ZFY	-	Y:2803111-2870667	-	-	0	0	0	OK	0	0	0	OK	0	0	0	OK	0	0	0	OK
ENSG00000067704	-	-	ENSG00000067704	IARS2	-	1:220267443-220321380	-	-	21.5151	14.9533	28.0768	OK	22.7442	13.4016	32.0867	OK	17.1465	12.552	21.741	OK	16.9301	11.8395	22.0206	OK
ENSG00000067715	-	-	ENSG00000067715	SYT1	-	12:79257772-79897176	-	-	5.40713	1.65715	9.15711	OK	6.53424	3.2753	9.79318	OK	6.36659	1.16351	11.5697	OK	5.01524	2.45981	7.57067	OK
ENSG00000067798	-	-	ENSG00000067798	NAV3	-	12:78224684-78606790	-	-	4.23292	0	8.79315	OK	6.88379	0	14.0975	OK	8.71396	0	17.5417	OK	6.16193	0	12.6171	OK
ENSG00000067829	-	-	ENSG00000067829	IDH3G	-	X:153051220-153063960	-	-	26.8673	16.2777	37.4568	OK	21.6888	11.9071	31.4706	OK	26.8654	14.2371	39.4937	OK	42.8449	26.6449	59.045	OK
ENSG00000067836	-	-	ENSG00000067836	ROGDI	-	16:4846968-4852951	-	-	5.67418	1.63131	9.71704	OK	5.59471	1.93351	9.25592	OK	7.7386	2.58675	12.8905	OK	5.94161	1.8164	10.0668	OK
ENSG00000067840	-	-	ENSG00000067840	PDZD4	-	X:153067620-153096020	-	-	0.327969	0	1.95373	OK	0.175801	0	1.59293	OK	0.0250856	0	1.39481	OK	0.010996	0	1.38909	OK
ENSG00000067842	-	-	ENSG00000067842	ATP2B3	-	X:152783133-152848397	-	-	0	0	0	OK	0.00747327	0	0.740731	OK	0.00493619	0	0.741635	OK	0.0276492	0	0.712167	OK
ENSG00000067900	-	-	ENSG00000067900	ROCK1	-	18:18526866-18691812	-	-	18.4232	5.54663	31.2997	OK	17.5188	5.3067	29.731	OK	16.5161	4.37301	28.6593	OK	18.4501	4.1696	32.7307	OK
ENSG00000067955	-	-	ENSG00000067955	CBFB	-	16:67063018-67134961	-	-	39.1977	28.5529	49.8425	OK	41.2642	29.8408	52.6875	OK	58.9445	42.4319	75.4571	OK	41.0067	29.2725	52.7409	OK
ENSG00000067992	-	-	ENSG00000067992	PDK3	-	X:24483337-24557954	-	-	2.85622	1.24646	4.46597	OK	2.87549	0.767196	4.98378	OK	3.44432	1.57015	5.3185	OK	2.49592	0.616901	4.37494	OK
ENSG00000068001	-	-	ENSG00000068001	HYAL2	-	3:50355220-50365682	-	-	69.9314	49.151	90.7118	OK	65.0638	46.9437	83.1838	OK	78.7697	56.4928	101.047	OK	72.388	52.2564	92.5196	OK
ENSG00000068024	-	-	ENSG00000068024	HDAC4	-	2:239969863-240324058	-	-	1.04498	0	3.70147	OK	1.78483	0	5.03611	OK	2.59213	0	6.29997	OK	2.01262	0	5.82948	OK
ENSG00000068028	-	-	ENSG00000068028	RASSF1	-	3:50367218-50378411	-	-	3.13544	1.15256	5.11831	OK	4.54542	2.36914	6.7217	OK	5.73897	2.96495	8.51299	OK	4.47777	2.28839	6.66716	OK
ENSG00000068078	-	-	ENSG00000068078	FGFR3	-	4:1795033-1810599	-	-	0	0	0	OK	0.084684	0	1.41065	OK	0.101033	0	1.49335	OK	0.0420888	0	1.32352	OK
ENSG00000068079	-	-	ENSG00000068079	IFI35	-	17:41158741-41166473	-	-	2.59837	0	5.83264	OK	1.80512	0	4.71099	OK	2.92225	0	6.02415	OK	2.18757	0	5.07128	OK
ENSG00000068097	-	-	ENSG00000068097	HEATR6	-	17:58120554-58156292	-	-	6.17455	0	13.4035	OK	3.87914	0.167981	7.5903	OK	5.89962	0	12.3903	OK	6.96221	2.09841	11.826	OK
ENSG00000068120	-	-	ENSG00000068120	COASY	-	17:40688189-40718295	-	-	15.9166	5.08559	26.7475	OK	15.8402	4.75552	26.925	OK	14.3189	4.00752	24.6303	OK	17.019	5.4123	28.6258	OK
ENSG00000068137	-	-	ENSG00000068137	PLEKHH3	-	17:40819931-40829048	-	-	0.855862	0	2.2588	OK	1.11972	0	3.13624	OK	2.34626	0	5.05976	OK	1.41366	0	3.68235	OK
ENSG00000068305	-	-	ENSG00000068305	MEF2A	-	15:100017369-100273766	-	-	15.2082	7.39323	23.0232	OK	22.7693	11.1845	34.3541	OK	38.1747	19.6816	56.6678	OK	21.3114	11.3204	31.3024	OK
ENSG00000068308	-	-	ENSG00000068308	OTUD5	-	X:48779304-48815648	-	-	26.6822	18.7313	34.6331	OK	20.9938	14.9681	27.0196	OK	25.856	18.1281	33.584	OK	22.0966	16.0721	28.121	OK
ENSG00000068323	-	-	ENSG00000068323	TFE3	-	X:48886241-48901012	-	-	8.03984	3.29626	12.7834	OK	6.71312	3.01369	10.4126	OK	7.22845	4.24372	10.2132	OK	8.03191	2.39307	13.6708	OK
ENSG00000068354	-	-	ENSG00000068354	TBC1D25	-	X:48397844-48420997	-	-	2.91417	0.537963	5.29037	OK	2.39784	0.397327	4.39834	OK	4.33134	1.80462	6.85806	OK	3.00701	0.586259	5.42775	OK
ENSG00000068366	-	-	ENSG00000068366	ACSL4	-	X:108866928-108976632	-	-	16.4248	9.09679	23.7529	OK	22.5701	14.51	30.6301	OK	25.835	19.1297	32.5403	OK	19.6607	13.3136	26.0077	OK
ENSG00000068383	-	-	ENSG00000068383	INPP5A	-	10:134351323-134598269	-	-	9.01887	4.74577	13.292	OK	11.547	6.82868	16.2654	OK	20.0911	10.1443	30.038	OK	19.8878	13.5446	26.231	OK
ENSG00000068394	-	-	ENSG00000068394	GPKOW	-	X:48970333-48980151	-	-	3.29646	2.07544	4.51748	OK	3.48734	2.24695	4.72773	OK	3.90803	2.5089	5.30716	OK	4.33576	2.84894	5.82259	OK
ENSG00000068400	-	-	ENSG00000068400	GRIPAP1	-	X:48830133-48858675	-	-	7.42399	3.24676	11.6012	OK	9.95137	3.65615	16.2466	OK	8.37159	3.25376	13.4894	OK	10.9416	4.91899	16.9642	OK
ENSG00000068438	-	-	ENSG00000068438	FTSJ1	-	X:48334540-48344752	-	-	17.353	10.9002	23.8059	OK	20.4113	13.1237	27.6988	OK	40.9929	27.5165	54.4694	OK	25.8046	16.5828	35.0264	OK
ENSG00000068489	-	-	ENSG00000068489	PRR11	-	17:57232859-57292608	-	-	22.5519	6.90367	38.2	OK	19.2251	2.7998	35.6505	OK	24.7667	9.98358	39.5499	OK	16.6544	3.33359	29.9753	OK
ENSG00000068615	-	-	ENSG00000068615	REEP1	-	2:86441115-86565206	-	-	0.097402	0	2.13853	OK	0.151194	0	1.84347	OK	0.0935014	0	2.12497	OK	0.269711	0	2.22604	OK
ENSG00000068650	-	-	ENSG00000068650	ATP11A	-	13:113344642-113541482	-	-	11.2679	6.24256	16.2933	OK	9.66924	5.01451	14.324	OK	12.9198	8.11364	17.726	OK	10.0958	5.28721	14.9045	OK
ENSG00000068654	-	-	ENSG00000068654	POLR1A	-	2:86247338-86333278	-	-	5.10377	0.919898	9.28765	OK	5.64417	1.22344	10.0649	OK	6.45266	1.21321	11.6921	OK	4.80708	0	9.76048	OK
ENSG00000068697	-	-	ENSG00000068697	LAPTM4A	-	2:20232410-20251789	-	-	291.519	224.375	358.663	OK	324.34	248.873	399.807	OK	339.423	261.319	417.528	OK	399.807	308.321	491.292	OK
ENSG00000068724	-	-	ENSG00000068724	TTC7A	-	2:47126413-47403740	-	-	1.36373	0	4.56743	OK	1.27521	0	4.82734	OK	3.23741	0	15.4366	OK	1.65685	0	6.77875	OK
ENSG00000068745	-	-	ENSG00000068745	IP6K2	-	3:48725435-48777786	-	-	33.7236	20.6361	46.8111	OK	32.0535	21.66	42.447	OK	31.2527	21.413	41.0924	OK	34.0968	23.4114	44.7822	OK
ENSG00000068781	-	-	ENSG00000068781	STON1-GTF2A1L	-	2:48756521-49003654	-	-	4.31457e-32	0	1.35567	OK	5.09522e-191	0	1.35669	OK	2.41318e-117	0	1.35821	OK	8.55886e-70	0	1.36178	OK
ENSG00000068784	-	-	ENSG00000068784	SRBD1	-	2:45615818-45839304	-	-	3.0226	1.37039	4.67481	OK	2.35269	0.802159	3.90321	OK	2.71193	1.04479	4.37907	OK	2.86427	0.828278	4.90026	OK
ENSG00000068793	-	-	ENSG00000068793	CYFIP1	-	15:22892004-23034427	-	-	22.407	14.7298	30.0841	OK	21.4548	12.7662	30.1434	OK	25.7319	16.1503	35.3136	OK	33.929	18.4096	49.4484	OK
ENSG00000068796	-	-	ENSG00000068796	KIF2A	-	5:61601988-61924409	-	-	13.1837	5.12233	21.245	OK	14.1087	4.2686	23.9488	OK	16.2769	6.37836	26.1754	OK	12.9094	2.81667	23.0021	OK
ENSG00000068831	-	-	ENSG00000068831	RASGRP2	-	11:64494382-64512928	-	-	0	0	0	OK	0	0	0	OK	0.0461032	0	3.38028	OK	0.670351	0	3.53181	OK
ENSG00000068878	-	-	ENSG00000068878	PSME4	-	2:54091203-54532437	-	-	26.6061	16.6191	36.593	OK	27.4115	15.2375	39.5854	OK	30.4522	19.484	41.4204	OK	24.0351	8.40709	39.663	OK
ENSG00000068885	-	-	ENSG00000068885	IFT80	-	3:159943422-160203561	-	-	12.7421	0	36.8756	OK	9.56925	0	22.6209	OK	11.9012	0	27.4072	OK	5.68755	0	12.9598	OK
ENSG00000068903	-	-	ENSG00000068903	SIRT2	-	19:39369196-39399533	-	-	9.35114	4.92912	13.7732	OK	8.48493	3.59436	13.3755	OK	11.9801	5.81025	18.1499	OK	9.86241	4.63559	15.0892	OK
ENSG00000068912	-	-	ENSG00000068912	ERLEC1	-	2:53759809-54087297	-	-	16.244	6.97623	25.5117	OK	18.46	10.1269	26.793	OK	30.6277	20.3275	40.9279	OK	30.2715	13.2022	47.3407	OK
ENSG00000068971	-	-	ENSG00000068971	PPP2R5B	-	11:64685024-64703360	-	-	4.28276	1.19366	7.37185	OK	7.27245	1.91647	12.6284	OK	6.38785	2.13526	10.6404	OK	4.49495	1.61331	7.37659	OK
ENSG00000068976	-	-	ENSG00000068976	PYGM	-	11:64513860-64527769	-	-	0.0804048	0	1.4576	OK	0.164071	0	1.49458	OK	0.118511	0	1.44829	OK	0.0634754	0	1.44054	OK
ENSG00000068985	-	-	ENSG00000068985	PAGE1	-	X:49452052-49460596	-	-	0	0	0	OK	0	0	0	OK	0	0	0	OK	0	0	0	OK
ENSG00000069011	-	-	ENSG00000069011	PITX1	-	5:134363424-134736986	-	-	0	0	0	OK	0	0	0	OK	0.0444875	0	1.17222	OK	0.165994	0	1.71166	OK
ENSG00000069018	-	-	ENSG00000069018	TRPC7	-	5:135712035-135732730	-	-	0	0	0	OK	0	0	0	OK	0.142694	0	1.1033	OK	0	0	0	OK
ENSG00000069020	-	-	ENSG00000069020	MAST4	-	5:65892175-66465423	-	-	32.991	9.05519	56.9268	OK	39.0311	7.27524	70.787	OK	41.4349	5.14834	77.7214	OK	35.7938	7.48336	64.1042	OK
ENSG00000069122	-	-	ENSG00000069122	GPR116	-	6:46820248-46922680	-	-	15.9055	9.50308	22.308	OK	14.5183	10.1575	18.8792	OK	15.4604	8.16866	22.7521	OK	25.7342	16.7131	34.7554	OK
ENSG00000069188	-	-	ENSG00000069188	SDK2	-	17:71330522-71640228	-	-	0	0	0	OK	0	0	0	OK	0.0284519	0	1.28407	OK	0.24649	0	1.89226	OK
ENSG00000069206	-	-	ENSG00000069206	ADAM7	-	8:24151552-24769586	-	-	0	0	0	OK	0	0	0	OK	0	0	0	OK	0	0	0	OK
ENSG00000069248	-	-	ENSG00000069248	NUP133	-	1:229577044-229644103	-	-	10.3256	4.95358	15.6976	OK	7.5003	5.15167	9.84893	OK	8.83409	5.61943	12.0487	OK	8.22083	5.26702	11.1746	OK
ENSG00000069275	-	-	ENSG00000069275	NUCKS1	-	1:205681946-205719404	-	-	394.615	0	834.283	OK	353.626	0	855.479	OK	349.595	0	825.662	OK	368.062	0	764.589	OK
ENSG00000069329	-	-	ENSG00000069329	VPS35	-	16:46690053-46723430	-	-	43.9372	15.724	72.1504	OK	57.3157	20.3297	94.3017	OK	43.4422	15.083	71.8014	OK	35.0212	11.6933	58.3492	OK
ENSG00000069345	-	-	ENSG00000069345	DNAJA2	-	16:46989298-47007699	-	-	24.5209	18.4524	30.5895	OK	25.8352	18.9385	32.732	OK	29.435	22.2	36.67	OK	28.257	21.2557	35.2583	OK
ENSG00000069399	-	-	ENSG00000069399	BCL3	-	19:45250961-45263301	-	-	5.17788	0.957807	9.39795	OK	13.2151	7.07666	19.3535	OK	11.4402	5.15315	17.7272	OK	11.1587	4.99148	17.3259	OK
ENSG00000069424	-	-	ENSG00000069424	KCNAB2	-	1:5922870-6161253	-	-	0.686364	0	2.76228	OK	0.676123	0	2.94637	OK	0.5789	0	2.73382	OK	2.00992	0	5.26856	OK
ENSG00000069431	-	-	ENSG00000069431	ABCC9	-	12:21950334-22094336	-	-	0.564684	0.182523	0.946846	OK	0.429718	0.0885289	0.770906	OK	0.542663	0.171801	0.913525	OK	0.537187	0.160925	0.913448	OK
ENSG00000069482	-	-	ENSG00000069482	GAL	-	11:68451246-68458643	-	-	4.6006	0.860478	8.34072	OK	4.47647	0.808973	8.14397	OK	2.17834	0	4.83583	OK	3.43288	0.143269	6.7225	OK
ENSG00000069493	-	-	ENSG00000069493	CLEC2D	-	12:9817564-9848823	-	-	1.06022	0	4.26823	OK	0.77858	0	3.37459	OK	0.561769	0	3.09147	OK	0.744813	0	3.41798	OK
ENSG00000069509	-	-	ENSG00000069509	FUNDC1	-	X:44382884-44402247	-	-	9.29334	6.29876	12.2879	OK	9.2885	6.34523	12.2318	OK	9.80535	6.68607	12.9246	OK	9.14735	6.21058	12.0841	OK
ENSG00000069535	-	-	ENSG00000069535	MAOB	-	X:43625857-43741693	-	-	0	0	0	OK	0	0	0	OK	0.0459481	0	1.28876	OK	0	0	0	OK
ENSG00000069667	-	-	ENSG00000069667	RORA	-	15:60771376-61521518	-	-	6.01922	1.61953	10.4189	OK	6.888	2.94888	10.8271	OK	4.47907	1.64301	7.31514	OK	8.15109	3.52864	12.7735	OK
ENSG00000069696	-	-	ENSG00000069696	DRD4	-	11:637292-640706	-	-	0	0	0	OK	0	0	0	OK	0	0	0	OK	0	0	0	OK
ENSG00000069702	-	-	ENSG00000069702	TGFBR3	-	1:92145901-92371892	-	-	2.1156	0.292162	3.93905	OK	2.53292	0.75456	4.31128	OK	1.21787	0	2.61152	OK	0.99407	0	2.21046	OK
ENSG00000069712	-	-	ENSG00000069712	KIAA1107	-	1:92632541-92650280	-	-	0.32349	0.127576	0.519404	OK	0.351666	0.146943	0.556389	OK	0.196522	0.046717	0.346327	OK	0.296708	0.097242	0.496175	OK
ENSG00000069764	-	-	ENSG00000069764	PLA2G10	-	16:14766404-14788526	-	-	0.770727	0	1.76995	OK	0.240818	0	0.989187	OK	0	0	0	OK	0.321019	0	1.55114	OK
ENSG00000069812	-	-	ENSG00000069812	HES2	-	1:6472477-6484730	-	-	2.06684	0	4.78851	OK	2.81189	0	6.36019	OK	2.04759	0	4.52118	OK	1.83267	0	4.58341	OK
ENSG00000069849	-	-	ENSG00000069849	ATP1B3	-	3:141594965-141645356	-	-	181.121	137.18	225.063	OK	218.487	164.428	272.546	OK	203.176	151.166	255.187	OK	267.755	199.992	335.517	OK
ENSG00000069869	-	-	ENSG00000069869	NEDD4	-	15:56119119-56285944	-	-	11.7618	6.62745	16.8961	OK	15.7121	4.51589	26.9083	OK	10.7251	6.20402	15.2462	OK	11.5211	4.53556	18.5067	OK
ENSG00000069943	-	-	ENSG00000069943	PIGB	-	15:55495163-55800432	-	-	6.24124	0	14.9167	OK	4.20935	0	11.0554	OK	4.91186	0	14.6398	OK	5.16941	0	15.8584	OK
ENSG00000069956	-	-	ENSG00000069956	MAPK6	-	15:52121824-52392720	-	-	12.1743	4.85553	19.4931	OK	18.5016	9.51135	27.4919	OK	16.4344	7.87505	24.9938	OK	10.8634	4.91996	16.8069	OK
ENSG00000069966	-	-	ENSG00000069966	GNB5	-	15:52408770-52587995	-	-	3.09406	0	6.31019	OK	1.95824	0	4.40887	OK	3.15709	0.178437	6.13574	OK	2.5073	0.116365	4.89824	OK
ENSG00000069974	-	-	ENSG00000069974	RAB27A	-	15:55495163-55800432	-	-	10.1657	1.71167	18.6196	OK	8.63017	1.25316	16.0072	OK	11.8548	1.51243	22.1972	OK	8.70944	0	18.7966	OK
ENSG00000069998	-	-	ENSG00000069998	CECR5	-	22:17618400-17646335	-	-	6.6387	3.46995	9.80746	OK	5.26742	2.16605	8.3688	OK	4.69194	1.82038	7.56351	OK	8.11468	4.08784	12.1415	OK
ENSG00000070010	-	-	ENSG00000070010	UFD1L	-	22:19318220-19466738	-	-	65.9162	28.3135	103.519	OK	41.1205	17.5203	64.7206	OK	46.0637	22.0012	70.1261	OK	52.4939	24.7704	80.2174	OK
ENSG00000070018	-	-	ENSG00000070018	LRP6	-	12:12202777-12419946	-	-	6.56497	0	14.26	OK	7.59361	1.55458	13.6326	OK	6.27835	0	12.5619	OK	4.90705	1.53609	8.27801	OK
ENSG00000070019	-	-	ENSG00000070019	GUCY2C	-	12:14656594-14910897	-	-	0	0	0	OK	0	0	0	OK	0	0	0	OK	0.00548996	0	0.232872	OK
ENSG00000070031	-	-	ENSG00000070031	SCT	-	11:626430-627143	-	-	0	0	0	OK	0	0	0	OK	0	0	0	OK	0	0	0	OK
ENSG00000070047	-	-	ENSG00000070047	PHRF1	-	11:576485-612222	-	-	4.90185	3.22538	6.57832	OK	5.58415	2.20593	8.96236	OK	6.48007	3.2633	9.69683	OK	5.5023	3.68877	7.31584	OK
ENSG00000070061	-	-	ENSG00000070061	IKBKAP	-	9:111629796-111696396	-	-	9.76544	1.76005	17.7708	OK	7.58253	2.77437	12.3907	OK	9.79241	4.29556	15.2893	OK	8.43941	4.70181	12.177	OK
ENSG00000070081	-	-	ENSG00000070081	NUCB2	-	11:17229699-17371521	-	-	48.7446	22.5078	74.9813	OK	47.6476	20.5406	74.7546	OK	121.76	61.4862	182.033	OK	130.576	65.2673	195.885	OK
ENSG00000070087	-	-	ENSG00000070087	PFN2	-	3:149478891-149942977	-	-	68.8953	49.2329	88.5577	OK	62.2076	44.0836	80.3316	OK	73.1373	49.4375	96.837	OK	64.3453	44.8268	83.8639	OK
ENSG00000070159	-	-	ENSG00000070159	PTPN3	-	9:112137745-112260590	-	-	0	0	0	OK	0.0785188	0	0.845068	OK	0.322024	0	1.21873	OK	0.0555888	0	0.826289	OK
ENSG00000070182	-	-	ENSG00000070182	SPTB	-	14:65170819-65346601	-	-	0.0782544	0	0.715355	OK	0.0930167	0	0.795831	OK	0.0561	0	0.693624	OK	0.0660605	0	0.68282	OK
ENSG00000070190	-	-	ENSG00000070190	DAPP1	-	4:100737989-100791311	-	-	0	0	0	OK	0.0723518	0	0.519557	OK	0.121332	0	0.576716	OK	0.0644682	0	0.511283	OK
ENSG00000070193	-	-	ENSG00000070193	FGF10	-	5:44303645-44414091	-	-	0	0	0	OK	0	0	0	OK	0	0	0	OK	0	0	0	OK
ENSG00000070214	-	-	ENSG00000070214	SLC44A1	-	9:108006902-108201452	-	-	6.32301	4.09681	8.54921	OK	5.61107	3.28822	7.93392	OK	5.96156	3.76487	8.15825	OK	6.63413	4.16237	9.1059	OK
ENSG00000070269	-	-	ENSG00000070269	TMEM260	-	14:56955071-57197253	-	-	4.9043	1.4369	8.37169	OK	4.56156	1.7122	7.41093	OK	4.19808	0.944158	7.45199	OK	4.45288	0.906438	7.99932	OK
ENSG00000070366	-	-	ENSG00000070366	SMG6	-	17:1963132-2284352	-	-	13.3998	2.84527	23.9544	OK	12.2097	2.32198	22.0975	OK	11.7054	1.70336	21.7073	OK	10.0444	1.92433	18.1644	OK
ENSG00000070367	-	-	ENSG00000070367	EXOC5	-	14:57670517-57756797	-	-	18.3737	8.25027	28.4971	OK	21.0908	10.8494	31.3322	OK	18.9292	10.7171	27.1413	OK	15.3493	7.26238	23.4361	OK
ENSG00000070371	-	-	ENSG00000070371	CLTCL1	-	22:19166985-19279239	-	-	1.30485	0	3.30764	OK	0.5241	0	2.09097	OK	1.54453	0	3.79863	OK	1.23975	0	3.02693	OK
ENSG00000070388	-	-	ENSG00000070388	FGF22	-	19:639878-643703	-	-	0	0	0	OK	0.0280342	0	1.15198	OK	0.242496	0	1.38023	OK	0.0651972	0	1.19967	OK
ENSG00000070404	-	-	ENSG00000070404	FSTL3	-	19:676391-683385	-	-	2.35299	0	5.76186	OK	2.83515	0	7.46852	OK	3.08086	0	7.18398	OK	3.38994	0	10.0919	OK
ENSG00000070413	-	-	ENSG00000070413	DGCR2	-	22:19023794-19115962	-	-	7.99134	4.92403	11.0587	OK	5.48076	2.06866	8.89286	OK	5.27059	2.86465	7.67652	OK	7.60316	4.78652	10.4198	OK
ENSG00000070423	-	-	ENSG00000070423	RNF126	-	19:647525-663277	-	-	11.1479	4.81335	17.4825	OK	9.75538	3.59388	15.9169	OK	14.2207	6.83093	21.6106	OK	12.7637	5.10822	20.4192	OK
ENSG00000070444	-	-	ENSG00000070444	MNT	-	17:2287353-2304412	-	-	4.29038	0.633374	7.94739	OK	7.26837	0.550078	13.9867	OK	6.77845	1.88781	11.6691	OK	3.861	0.930352	6.79164	OK
ENSG00000070476	-	-	ENSG00000070476	ZXDC	-	3:126156443-126194762	-	-	4.76213	2.67919	6.84508	OK	4.87959	3.03339	6.72578	OK	7.15289	4.51504	9.79074	OK	5.38066	3.25919	7.50214	OK
ENSG00000070495	-	-	ENSG00000070495	JMJD6	-	17:74708918-74722866	-	-	9.65867	6.07033	13.247	OK	9.16523	5.6011	12.7294	OK	12.8434	6.81776	18.8691	OK	11.9313	7.67636	16.1862	OK
ENSG00000070501	-	-	ENSG00000070501	POLB	-	8:42195971-42229326	-	-	10.9154	4.7618	17.0691	OK	10.8471	5.31119	16.3831	OK	10.823	5.28559	16.3604	OK	14.1188	7.45676	20.7808	OK
ENSG00000070526	-	-	ENSG00000070526	ST6GALNAC1	-	17:74620842-74639920	-	-	0	0	0	OK	0.144064	0	2.36952	OK	0	0	0	OK	0.548531	0	2.43639	OK
ENSG00000070540	-	-	ENSG00000070540	WIPI1	-	17:66255322-66760023	-	-	29.2227	5.87955	52.5659	OK	26.2677	6.09003	46.4455	OK	50.0473	14.2725	85.8222	OK	33.0224	6.30097	59.7438	OK
ENSG00000070601	-	-	ENSG00000070601	FRMPD1	-	9:37510888-38069210	-	-	0	0	0	OK	0.321666	0	3.10154	OK	0.358377	0	2.88194	OK	0.0894999	0	1.62651	OK
ENSG00000070610	-	-	ENSG00000070610	GBA2	-	9:35696944-35758572	-	-	27.799	0	57.8819	OK	29.6874	2.06423	57.3105	OK	30.2273	1.16357	59.2911	OK	32.5987	2.07821	63.1192	OK
ENSG00000070614	-	-	ENSG00000070614	NDST1	-	5:149855093-149937773	-	-	22.8966	15.4889	30.3043	OK	18.737	13.3636	24.1104	OK	31.2413	19.2287	43.2539	OK	34.4989	23.5326	45.4653	OK
ENSG00000070669	-	-	ENSG00000070669	ASNS	-	7:97481429-97501854	-	-	11.2181	0	24.4155	OK	15.905	8.62102	23.189	OK	26.4698	15.9183	37.0213	OK	21.4846	11.38	31.5892	OK
ENSG00000070718	-	-	ENSG00000070718	AP3M2	-	8:42010463-42029191	-	-	5.91074	1.60315	10.2183	OK	4.38544	0	9.32955	OK	7.23611	0	14.5717	OK	6.24825	1.72806	10.7684	OK
ENSG00000070729	-	-	ENSG00000070729	CNGB1	-	16:57917502-58005020	-	-	0.0644599	0	1.90254	OK	0.0112826	0	1.82343	OK	0	0	0	OK	0	0	0	OK
ENSG00000070731	-	-	ENSG00000070731	ST6GALNAC2	-	17:74553847-74583038	-	-	9.18139	5.52273	12.84	OK	7.98144	4.63468	11.3282	OK	8.55739	5.00798	12.1068	OK	8.24801	4.54705	11.949	OK
ENSG00000070748	-	-	ENSG00000070748	CHAT	-	10:50817140-50918307	-	-	0	0	0	OK	0	0	0	OK	0	0	0	OK	0	0	0	OK
ENSG00000070756	-	-	ENSG00000070756	PABPC1	-	8:101698043-101735037	-	-	1209.63	759.299	1659.96	OK	1174.94	712.63	1637.25	OK	1158.37	702.567	1614.17	OK	1121.17	696.589	1545.74	OK
ENSG00000070759	-	-	ENSG00000070759	TESK2	-	1:45794834-45956872	-	-	1.0118	0	3.11753	OK	0.713168	0	1.932	OK	0.640084	0	1.87164	OK	0.799282	0	1.9526	OK
ENSG00000070761	-	-	ENSG00000070761	C16orf80	-	16:58147495-58163354	-	-	40.0658	21.452	58.6795	OK	35.2689	18.7507	51.7872	OK	43.0794	26.3915	59.7672	OK	37.9564	21.1547	54.7582	OK
ENSG00000070770	-	-	ENSG00000070770	CSNK2A2	-	16:58163432-58251709	-	-	50.3636	36.7541	63.9732	OK	48.0949	33.1209	63.0689	OK	46.1442	32.9067	59.3817	OK	47.4329	34.4696	60.3962	OK
ENSG00000070778	-	-	ENSG00000070778	PTPN21	-	14:88851267-89021077	-	-	6.47863	2.70625	10.251	OK	5.13658	3.03202	7.24114	OK	3.88605	2.10727	5.66483	OK	4.64077	2.387	6.89455	OK
ENSG00000070785	-	-	ENSG00000070785	EIF2B3	-	1:45316449-45452282	-	-	11.375	6.47938	16.2707	OK	10.7474	5.53187	15.963	OK	18.7247	11.1048	26.3446	OK	25.0622	15.5069	34.6175	OK
ENSG00000070808	-	-	ENSG00000070808	CAMK2A	-	5:149569519-149669854	-	-	0	0	0	OK	0	0	0	OK	0	0	0	OK	0	0	0	OK
ENSG00000070814	-	-	ENSG00000070814	TCOF1	-	5:149737201-149779871	-	-	9.19946	1.98886	16.4101	OK	7.88106	2.00853	13.7536	OK	9.19089	3.10817	15.2736	OK	8.53378	3.42879	13.6388	OK
ENSG00000070831	-	-	ENSG00000070831	CDC42	-	1:22379119-22419437	-	-	145.377	111.822	178.933	OK	145.685	111.961	179.409	OK	135.854	105.036	166.672	OK	135.936	104.694	167.179	OK
ENSG00000070882	-	-	ENSG00000070882	OSBPL3	-	7:24836157-25021253	-	-	11.6348	5.0343	18.2353	OK	13.6844	0.060457	27.3083	OK	21.1931	0.17615	42.2101	OK	11.858	2.2769	21.4391	OK
ENSG00000070886	-	-	ENSG00000070886	EPHA8	-	1:22890056-22930087	-	-	0	0	0	OK	0	0	0	OK	0	0	0	OK	0	0	0	OK
ENSG00000070915	-	-	ENSG00000070915	SLC12A3	-	16:56899118-56949762	-	-	0	0	0	OK	0	0	0	OK	0.0102608	0	0.64458	OK	0	0	0	OK
ENSG00000070950	-	-	ENSG00000070950	RAD18	-	3:8661085-9005457	-	-	6.0869	1.71661	10.4572	OK	7.05288	0.105475	14.0003	OK	7.93955	2.13723	13.7419	OK	4.10489	0.198399	8.01139	OK
ENSG00000070961	-	-	ENSG00000070961	ATP2B1	-	12:89954905-90106367	-	-	5.64016	2.69888	8.58144	OK	8.67375	3.36604	13.9815	OK	17.9877	5.8122	30.1633	OK	8.71714	3.44188	13.9924	OK
ENSG00000070985	-	-	ENSG00000070985	TRPM5	-	11:2425744-2444275	-	-	0	0	0	OK	0	0	0	OK	0	0	0	OK	0	0	0	OK
ENSG00000071051	-	-	ENSG00000071051	NCK2	-	2:106361353-106510730	-	-	31.1308	22.5	39.7616	OK	32.8297	23.8582	41.8013	OK	26.723	19.1382	34.3078	OK	25.2737	18.1995	32.348	OK
ENSG00000071054	-	-	ENSG00000071054	MAP4K4	-	2:102313311-102511150	-	-	101.138	63.5622	138.714	OK	104.666	67.1778	142.153	OK	100.701	69.2674	132.135	OK	94.4859	60.057	128.915	OK
ENSG00000071073	-	-	ENSG00000071073	MGAT4A	-	2:99235568-99347589	-	-	11.8835	4.31969	19.4474	OK	13.5387	6.55079	20.5266	OK	10.9911	6.73588	15.2462	OK	10.5303	4.90666	16.1539	OK
ENSG00000071082	-	-	ENSG00000071082	RPL31	-	2:101436613-101886778	-	-	1259.09	931.943	1586.23	OK	1159.88	860.64	1459.12	OK	1326.51	979.458	1673.57	OK	1469.01	1084.95	1853.08	OK
ENSG00000071127	-	-	ENSG00000071127	WDR1	-	4:10075962-10118573	-	-	225.336	135.392	315.279	OK	228.336	126.827	329.845	OK	215.748	104.177	327.319	OK	247.523	101.567	393.479	OK
ENSG00000071189	-	-	ENSG00000071189	SNX13	-	7:17830384-17980124	-	-	7.86525	1.07484	14.6557	OK	6.61873	1.03592	12.2015	OK	5.67168	2.53778	8.80558	OK	5.10404	1.64759	8.56049	OK
ENSG00000071203	-	-	ENSG00000071203	MS4A12	-	11:60260250-60274903	-	-	0	0	0	OK	0	0	0	OK	0	0	0	OK	0	0	0	OK
ENSG00000071205	-	-	ENSG00000071205	ARHGAP10	-	4:148653213-148993931	-	-	9.66818	6.2755	13.0609	OK	9.95036	6.44378	13.4569	OK	11.9266	8.53169	15.3215	OK	13.4971	9.43288	17.5612	OK
ENSG00000071242	-	-	ENSG00000071242	RPS6KA2	-	6:166822851-167370679	-	-	33.7227	24.33	43.1155	OK	32.0994	23.7295	40.4693	OK	38.1789	27.7468	48.6109	OK	28.01	20.0153	36.0048	OK
ENSG00000071243	-	-	ENSG00000071243	ING3	-	7:120590802-120617270	-	-	8.54278	4.38435	12.7012	OK	6.36701	2.94878	9.78524	OK	6.73482	3.78147	9.68816	OK	5.57052	2.99992	8.14112	OK
ENSG00000071246	-	-	ENSG00000071246	VASH1	-	14:77228531-77253067	-	-	52.5735	23.7116	81.4354	OK	34.672	15.5813	53.7626	OK	65.8034	31.3739	100.233	OK	81.9119	35.0795	128.744	OK
ENSG00000071282	-	-	ENSG00000071282	LMCD1	-	3:7994491-8653610	-	-	3.75944	1.73827	5.78062	OK	3.27275	1.54942	4.99607	OK	4.19285	1.75442	6.63128	OK	3.69469	1.43961	5.94976	OK
ENSG00000071462	-	-	ENSG00000071462	WBSCR22	-	7:73095298-73134002	-	-	22.3096	13.2937	31.3255	OK	23.0417	11.0024	35.0809	OK	21.0842	11.7623	30.4062	OK	25.1518	15.9311	34.3725	OK
ENSG00000071537	-	-	ENSG00000071537	SEL1L	-	14:81937892-82000205	-	-	18.1527	12.3279	23.9776	OK	25.731	15.1386	36.3235	OK	73.7597	51.3159	96.2035	OK	33.2607	23.7626	42.7589	OK
ENSG00000071539	-	-	ENSG00000071539	TRIP13	-	5:710470-919472	-	-	11.2718	0	24.7569	OK	11.7256	0	25.8903	OK	11.7265	0	23.8388	OK	5.63726	0	13.6816	OK
ENSG00000071553	-	-	ENSG00000071553	ATP6AP1	-	X:153656977-153664862	-	-	45.9244	33.2691	58.5798	OK	40.2115	29.2781	51.145	OK	52.4553	38.2784	66.6321	OK	64.4045	47.7705	81.0384	OK
ENSG00000071564	-	-	ENSG00000071564	TCF3	-	19:1609290-1652604	-	-	53.8526	29.556	78.1492	OK	43.6537	25.8288	61.4786	OK	45.3682	29.0988	61.6376	OK	45.7104	25.3026	66.1181	OK
ENSG00000071575	-	-	ENSG00000071575	TRIB2	-	2:12857014-12882860	-	-	8.88346	5.32204	12.4449	OK	13.0849	7.98705	18.1828	OK	7.86272	4.58559	11.1399	OK	3.55375	1.95116	5.15633	OK
ENSG00000071626	-	-	ENSG00000071626	DAZAP1	-	19:1407567-1435719	-	-	58.6364	41.1537	76.1192	OK	45.4648	31.9257	59.0039	OK	47.5141	33.7071	61.3211	OK	54.5185	38.5709	70.4661	OK
ENSG00000071655	-	-	ENSG00000071655	MBD3	-	19:1576638-1605480	-	-	8.01951	3.56522	12.4738	OK	10.2616	4.25225	16.271	OK	9.18185	3.97028	14.3934	OK	9.71993	3.75881	15.6811	OK
ENSG00000071677	-	-	ENSG00000071677	PRLH	-	2:238475216-238475818	-	-	0	0	0	OK	0	0	0	OK	0	0	0	OK	0	0	0	OK
ENSG00000071794	-	-	ENSG00000071794	HLTF	-	3:148747913-148820610	-	-	5.39825	0	10.824	OK	4.27573	0.230662	8.32081	OK	4.24885	0.780023	7.71767	OK	3.76709	1.10418	6.43	OK
ENSG00000071859	-	-	ENSG00000071859	FAM50A	-	X:153672472-153679002	-	-	20.0487	8.5222	31.5753	OK	15.4411	8.66545	22.2168	OK	21.6414	12.7169	30.5659	OK	23.4933	14.1274	32.8592	OK
ENSG00000071889	-	-	ENSG00000071889	FAM3A	-	X:153733349-153744566	-	-	8.26385	1.02185	15.5059	OK	5.51374	1.54566	9.48182	OK	6.0615	0.584798	11.5382	OK	8.82155	3.84081	13.8023	OK
ENSG00000071894	-	-	ENSG00000071894	CPSF1	-	8:145596789-145634753	-	-	13.9956	4.47481	23.5163	OK	12.4839	5.08417	19.8835	OK	19.9484	9.08568	30.8111	OK	23.488	10.819	36.1571	OK
ENSG00000071909	-	-	ENSG00000071909	MYO3B	-	2:171034654-171551884	-	-	0.0310954	0	0.548615	OK	0.109238	0	0.610846	OK	0	0	0	OK	0.0543642	0	0.545611	OK
ENSG00000071967	-	-	ENSG00000071967	CYBRD1	-	2:172378756-172414643	-	-	5.725	1.51461	9.93538	OK	6.6336	2.78302	10.4842	OK	8.32718	5.07099	11.5834	OK	6.47594	2.46952	10.4824	OK
ENSG00000071991	-	-	ENSG00000071991	CDH19	-	18:64168319-64271375	-	-	0	0	0	OK	0	0	0	OK	0	0	0	OK	0.0293814	0	0.691375	OK
ENSG00000071994	-	-	ENSG00000071994	PDCD2	-	6:170884382-170893780	-	-	25.3975	18.4258	32.3691	OK	20.837	14.877	26.7969	OK	22.4729	12.6834	32.2624	OK	20.3144	14.1397	26.4892	OK
ENSG00000072041	-	-	ENSG00000072041	SLC6A15	-	12:85253491-85307394	-	-	0.102983	0	1.59858	OK	0.464194	0	2.09034	OK	0.130745	0	1.64446	OK	0.226242	0	1.77015	OK
ENSG00000072042	-	-	ENSG00000072042	RDH11	-	14:68086514-68162531	-	-	44.2775	30.0343	58.5208	OK	37.0024	24.618	49.3868	OK	45.0146	29.8396	60.1895	OK	60.5262	42.6934	78.359	OK
ENSG00000072062	-	-	ENSG00000072062	PRKACA	-	19:14202499-14228896	-	-	32.2471	15.7751	48.7191	OK	30.9286	13.2987	48.5585	OK	29.1668	9.32952	49.004	OK	27.3034	17.2611	37.3457	OK
ENSG00000072071	-	-	ENSG00000072071	LPHN1	-	19:14247990-14316999	-	-	2.41351	0	5.31643	OK	1.74947	0	4.15555	OK	1.28596	0	3.36359	OK	1.49181	0	4.39393	OK
ENSG00000072080	-	-	ENSG00000072080	SPP2	-	2:234959322-234985778	-	-	1.67413	0	3.89079	OK	2.30606	0	5.74426	OK	4.95363	0.0951842	9.81208	OK	0.315379	0	1.77975	OK
ENSG00000072110	-	-	ENSG00000072110	ACTN1	-	14:69340859-69446157	-	-	143.023	97.8465	188.2	OK	140.758	90.7395	190.777	OK	156.965	108.474	205.456	OK	113.055	81.6507	144.46	OK
ENSG00000072121	-	-	ENSG00000072121	ZFYVE26	-	14:68168602-68283307	-	-	6.09122	0	13.1228	OK	2.55933	0.362097	4.75657	OK	5.17715	0	11.1176	OK	2.46365	0.242544	4.68475	OK
ENSG00000072133	-	-	ENSG00000072133	RPS6KA6	-	X:83318983-83442933	-	-	0.0920889	0	0.996275	OK	0.104844	0	0.970181	OK	0.935687	0	2.39421	OK	0.293662	0	1.30615	OK
ENSG00000072134	-	-	ENSG00000072134	EPN2	-	17:19118927-19240028	-	-	13.3616	3.24686	23.4763	OK	14.5971	4.34072	24.8534	OK	19.0935	4.69503	33.4919	OK	11.4929	1.50069	21.4852	OK
ENSG00000072135	-	-	ENSG00000072135	PTPN18	-	2:131113579-131132982	-	-	9.21055	5.42174	12.9994	OK	7.71587	4.20645	11.2253	OK	8.59506	3.79685	13.3933	OK	10.8572	6.44164	15.2728	OK
ENSG00000072163	-	-	ENSG00000072163	LIMS2	-	2:128395955-128439360	-	-	6.0256	2.35368	9.69752	OK	4.54667	1.67748	7.41585	OK	2.82689	0.00589088	5.64788	OK	4.42552	1.37105	7.47999	OK
ENSG00000072182	-	-	ENSG00000072182	ASIC4	-	2:220299567-220403494	-	-	0	0	0	OK	0	0	0	OK	0	0	0	OK	0	0	0	OK
ENSG00000072195	-	-	ENSG00000072195	SPEG	-	2:220299567-220403494	-	-	1.05211	0	3.80446	OK	1.16331	0	4.28635	OK	0.361778	0	2.80304	OK	0.0577104	0	2.38153	OK
ENSG00000072201	-	-	ENSG00000072201	LNX1	-	4:54243809-55164414	-	-	1.18069	0	3.19224	OK	1.09609	0	3.26753	OK	1.30408	0	3.42887	OK	0.855249	0	2.78754	OK
ENSG00000072210	-	-	ENSG00000072210	ALDH3A2	-	17:19551448-19580911	-	-	10.7317	3.92569	17.5377	OK	9.52654	1.46906	17.584	OK	10.7965	0.426924	21.1661	OK	9.55178	2.98698	16.1166	OK
ENSG00000072274	-	-	ENSG00000072274	TFRC	-	3:195754053-195809060	-	-	16.5697	10.2658	22.8736	OK	21.6381	14.4158	28.8605	OK	19.4886	12.1708	26.8064	OK	18.1545	11.8121	24.4969	OK
ENSG00000072310	-	-	ENSG00000072310	SREBF1	-	17:17584786-17740325	-	-	20.4267	7.82007	33.0333	OK	17.7415	4.53332	30.9498	OK	27.8068	2.34399	53.2696	OK	23.685	11.0331	36.3368	OK
ENSG00000072315	-	-	ENSG00000072315	TRPC5	-	X:111017542-111326004	-	-	0	0	0	OK	0	0	0	OK	0	0	0	OK	0	0	0	OK
ENSG00000072364	-	-	ENSG00000072364	AFF4	-	5:132211070-132299326	-	-	15.5107	8.11286	22.9085	OK	22.1678	12.9454	31.3901	OK	19.7177	11.4717	27.9637	OK	14.6685	8.2966	21.0404	OK
ENSG00000072401	-	-	ENSG00000072401	UBE2D1	-	10:60094734-60130513	-	-	28.1304	20.426	35.8348	OK	35.2458	25.5417	44.9498	OK	32.8602	22.9859	42.7345	OK	22.8101	15.6938	29.9264	OK
ENSG00000072415	-	-	ENSG00000072415	MPP5	-	14:67707825-67853233	-	-	6.08131	0.672525	11.4901	OK	4.45136	0.242321	8.66039	OK	7.00797	0	20.3973	OK	4.02109	0	8.16271	OK
ENSG00000072422	-	-	ENSG00000072422	RHOBTB1	-	10:62629195-62761198	-	-	8.91806	4.36472	13.4714	OK	11.4876	5.78698	17.1883	OK	19.236	7.88451	30.5875	OK	18.8277	1.54632	36.109	OK
ENSG00000072444	-	-	ENSG00000072444	ASAH2C	-	10:48001602-48055018	-	-	0	0	0	OK	0	0	0	OK	0	0	0	OK	0	0	0	OK
ENSG00000072501	-	-	ENSG00000072501	SMC1A	-	X:53401069-53458059	-	-	13.9413	6.17986	21.7028	OK	8.50836	4.50857	12.5081	OK	11.9364	6.78313	17.0897	OK	8.39864	3.77316	13.0241	OK
ENSG00000072506	-	-	ENSG00000072506	HSD17B10	-	X:53458205-53461320	-	-	22.8016	15.5609	30.0424	OK	14.7539	9.54712	19.9606	OK	16.3078	10.5326	22.0829	OK	18.6921	12.3527	25.0314	OK
ENSG00000072518	-	-	ENSG00000072518	MARK2	-	11:63606399-63678491	-	-	5.74236	3.18405	8.30068	OK	6.63237	3.48778	9.77696	OK	7.91066	4.40997	11.4113	OK	7.43394	4.31675	10.5511	OK
ENSG00000072571	-	-	ENSG00000072571	HMMR	-	5:162887208-162921064	-	-	6.20741	2.84155	9.57326	OK	4.98794	2.89087	7.08501	OK	6.27864	2.87519	9.68209	OK	3.9618	2.30011	5.62348	OK
ENSG00000072609	-	-	ENSG00000072609	CHFR	-	12:133345494-133532892	-	-	12.2754	1.59425	22.9566	OK	11.9482	1.89435	22.0021	OK	10.1094	0	20.9279	OK	12.6153	0	25.2709	OK
ENSG00000072657	-	-	ENSG00000072657	TRHDE	-	12:72332625-73059422	-	-	0	0	0	OK	0	0	0	OK	0	0	0	OK	0	0	0	OK
ENSG00000072682	-	-	ENSG00000072682	P4HA2	-	5:131520568-131731306	-	-	11.6836	7.29324	16.0739	OK	12.1153	7.6607	16.5699	OK	11.1171	6.56491	15.6693	OK	15.9988	10.3936	21.604	OK
ENSG00000072694	-	-	ENSG00000072694	FCGR2B	-	1:161475219-161648444	-	-	0	0	0	OK	0	0	0	OK	0	0	0	OK	0.0111361	0	0.737975	OK
ENSG00000072736	-	-	ENSG00000072736	NFATC3	-	16:68021296-68272005	-	-	7.49696	4.25518	10.7388	OK	6.50126	3.35898	9.64354	OK	7.13122	3.07834	11.1841	OK	6.59417	3.50286	9.68548	OK
ENSG00000072756	-	-	ENSG00000072756	TRNT1	-	3:3168599-3221394	-	-	10.4836	1.39516	19.572	OK	9.20507	3.01468	15.3955	OK	8.56419	3.7831	13.3453	OK	10.2603	3.34475	17.1758	OK
ENSG00000072778	-	-	ENSG00000072778	ACADVL	-	17:7093208-7128592	-	-	67.2834	43.2498	91.317	OK	64.2976	39.4618	89.1335	OK	81.5326	42.225	120.84	OK	94.2365	62.55	125.923	OK
ENSG00000072786	-	-	ENSG00000072786	STK10	-	5:171469076-171615390	-	-	11.7764	3.24458	20.3082	OK	10.6736	3.22312	18.1241	OK	11.2368	4.3394	18.1341	OK	13.8667	3.28506	24.4483	OK
ENSG00000072803	-	-	ENSG00000072803	FBXW11	-	5:171288552-171433877	-	-	12.8144	6.12348	19.5053	OK	12.6711	6.28212	19.0601	OK	16.1377	9.12291	23.1526	OK	10.5849	4.26596	16.9039	OK
ENSG00000072818	-	-	ENSG00000072818	ACAP1	-	17:7239847-7254797	-	-	0.403559	0	3.58152	OK	0.321972	0	2.99764	OK	0.183774	0	2.81006	OK	0.401167	0	3.07091	OK
ENSG00000072832	-	-	ENSG00000072832	CRMP1	-	4:5712923-5894785	-	-	6.85398	3.44303	10.2649	OK	7.06647	3.64213	10.4908	OK	5.26314	2.28694	8.23934	OK	4.88111	1.99642	7.7658	OK
ENSG00000072840	-	-	ENSG00000072840	EVC	-	4:5712923-5894785	-	-	2.64462	0.97226	4.31699	OK	2.46066	0.734915	4.18641	OK	2.5649	0.797708	4.3321	OK	2.1056	0.430594	3.7806	OK
ENSG00000072849	-	-	ENSG00000072849	DERL2	-	17:5374570-5394134	-	-	92.5341	52.8819	132.186	OK	100.893	55.6276	146.159	OK	214.276	128.891	299.661	OK	97.9723	61.1096	134.835	OK
ENSG00000072858	-	-	ENSG00000072858	SIDT1	-	3:113251142-113348425	-	-	0.508631	0	2.58589	OK	0.672607	0	2.8725	OK	0.652469	0	2.80161	OK	0.389445	0	2.42725	OK
ENSG00000072864	-	-	ENSG00000072864	NDE1	-	16:15737123-15950890	-	-	15.6052	7.94694	23.2634	OK	15.6421	8.67585	22.6084	OK	18.2139	10.7204	25.7074	OK	17.1886	9.74001	24.6373	OK
ENSG00000072952	-	-	ENSG00000072952	MRVI1	-	11:10562818-10715535	-	-	0.859405	0	3.58662	OK	0.17621	0	1.87528	OK	0.192112	0	1.93058	OK	0.260435	0	2.3863	OK
ENSG00000072954	-	-	ENSG00000072954	TMEM38A	-	19:16771937-16800840	-	-	0.382173	0	1.41902	OK	0.424663	0	1.59794	OK	1.35363	0	3.80263	OK	1.06524	0	2.4474	OK
ENSG00000072958	-	-	ENSG00000072958	AP1M1	-	19:16308388-16346160	-	-	28.1541	15.3653	40.9428	OK	19.7675	9.08116	30.4538	OK	20.5664	7.76935	33.3634	OK	26.7901	13.7401	39.84	OK
ENSG00000073008	-	-	ENSG00000073008	PVR	-	19:45041044-45222031	-	-	20.273	10.6684	29.8776	OK	24.0023	14.9272	33.0774	OK	25.1025	16.9817	33.2233	OK	23.3008	13.1047	33.497	OK
ENSG00000073009	-	-	ENSG00000073009	IKBKG	-	X:153759605-153796782	-	-	6.90087	0	14.6876	OK	4.19078	0	9.74611	OK	5.26365	0	11.4903	OK	6.04683	0	14.8354	OK
ENSG00000073050	-	-	ENSG00000073050	XRCC1	-	19:44047191-44100287	-	-	8.63245	3.61352	13.6514	OK	7.4891	2.35576	12.6224	OK	10.7882	2.16519	19.4113	OK	10.9392	3.73326	18.1451	OK
ENSG00000073060	-	-	ENSG00000073060	SCARB1	-	12:125261401-125367214	-	-	21.2234	7.78172	34.6651	OK	17.4763	9.81464	25.1379	OK	23.9836	12.889	35.0782	OK	18.0122	9.18156	26.8429	OK
ENSG00000073067	-	-	ENSG00000073067	CYP2W1	-	7:1022834-1029276	-	-	0.180061	0	1.28168	OK	0	0	0	OK	0.13456	0	1.21391	OK	0	0	0	OK
ENSG00000073111	-	-	ENSG00000073111	MCM2	-	3:127291911-127341276	-	-	8.54774	0.590431	16.505	OK	3.64449	0.970917	6.31806	OK	3.99225	0	8.08198	OK	2.46651	0.0419244	4.89111	OK
ENSG00000073146	-	-	ENSG00000073146	MOV10L1	-	22:50528307-50600119	-	-	6.13974	2.23279	10.0467	OK	4.55458	2.13794	6.97122	OK	3.01498	1.0762	4.95375	OK	2.1777	0.481653	3.87374	OK
ENSG00000073150	-	-	ENSG00000073150	PANX2	-	22:50609159-50618723	-	-	1.15754	0.13856	2.17652	OK	0.638401	0	1.31809	OK	0.541829	0	1.25667	OK	0.626083	0	1.3724	OK
ENSG00000073169	-	-	ENSG00000073169	SELO	-	22:50639407-50656045	-	-	2.53326	1.03739	4.02912	OK	1.44204	0.351335	2.53275	OK	1.77559	0.223871	3.32731	OK	2.85626	1.20821	4.50431	OK
ENSG00000073282	-	-	ENSG00000073282	TP63	-	3:189349204-189615068	-	-	0.429178	0	1.88021	OK	0.424214	0	1.87084	OK	0.10219	0	1.37957	OK	1.31695	0	3.39144	OK
ENSG00000073331	-	-	ENSG00000073331	ALPK1	-	4:113195697-113363776	-	-	0.362891	0	2.45488	OK	1.60728	0	4.69341	OK	2.36172	0	8.98147	OK	1.28822	0	3.77617	OK
ENSG00000073350	-	-	ENSG00000073350	LLGL2	-	17:73521160-73571289	-	-	1.70643	0	4.99128	OK	0.123611	0	2.9181	OK	1.27472	0	4.48852	OK	0.896291	0	5.07497	OK
ENSG00000073417	-	-	ENSG00000073417	PDE8A	-	15:85523670-85682376	-	-	12.551	0	27.0296	OK	10.9097	0	26.5421	OK	19.5979	6.53863	32.6571	OK	15.7768	3.80416	27.7494	OK
ENSG00000073464	-	-	ENSG00000073464	CLCN4	-	X:10125023-10205700	-	-	2.13191	1.09145	3.17237	OK	2.10071	1.02839	3.17303	OK	1.18509	0.19989	2.17029	OK	1.22998	0.299131	2.16083	OK
ENSG00000073536	-	-	ENSG00000073536	NLE1	-	17:33448597-33469334	-	-	2.65114	0.451995	4.85029	OK	2.52283	0	5.32092	OK	2.78791	0.736562	4.83926	OK	2.32161	0.920817	3.72241	OK
ENSG00000073578	-	-	ENSG00000073578	SDHA	-	5:218355-256815	-	-	36.6821	20.0601	53.3041	OK	30.0529	15.8677	44.2382	OK	31.9065	19.667	44.146	OK	41.2886	25.4272	57.1501	OK
ENSG00000073584	-	-	ENSG00000073584	SMARCE1	-	17:38781213-38821433	-	-	77.7238	49.9157	105.532	OK	74.9759	48.4511	101.501	OK	62.6234	39.9908	85.256	OK	66.473	43.1284	89.8176	OK
ENSG00000073598	-	-	ENSG00000073598	FNDC8	-	17:33448597-33469334	-	-	0	0	0	OK	0	0	0	OK	0	0	0	OK	0	0	0	OK
ENSG00000073605	-	-	ENSG00000073605	GSDMB	-	17:38060847-38076107	-	-	3.29742	0.102677	6.49216	OK	2.73775	0	5.73854	OK	3.36597	0.0212154	6.71072	OK	3.92305	0.25226	7.59384	OK
ENSG00000073614	-	-	ENSG00000073614	KDM5A	-	12:389294-551811	-	-	8.63829	0	17.6219	OK	10.7066	0.443345	20.9699	OK	9.54539	1.9728	17.118	OK	11.8994	1.68391	22.1149	OK
ENSG00000073670	-	-	ENSG00000073670	ADAM11	-	17:42836398-42859214	-	-	0	0	0	OK	0.169269	0	1.07693	OK	0.0118077	0	0.61762	OK	0.0197515	0	0.624533	OK
ENSG00000073711	-	-	ENSG00000073711	PPP2R3A	-	3:135684514-135866733	-	-	6.19206	3.46859	8.91553	OK	6.39364	3.25327	9.53402	OK	6.46651	3.42728	9.50574	OK	6.50263	4.08555	8.91971	OK
ENSG00000073712	-	-	ENSG00000073712	FERMT2	-	14:53323985-53419153	-	-	26.294	17.1989	35.3891	OK	30.5489	21.408	39.6898	OK	24.1342	17.4451	30.8233	OK	31.0684	20.4027	41.734	OK
ENSG00000073734	-	-	ENSG00000073734	ABCB11	-	2:169779447-169887832	-	-	0.0360592	0	0.646803	OK	0.0416709	0	0.641057	OK	0.0614811	0	0.66707	OK	0.0149044	0	0.615576	OK
ENSG00000073737	-	-	ENSG00000073737	DHRS9	-	2:169921298-169952677	-	-	0	0	0	OK	0	0	0	OK	0	0	0	OK	0.0784269	0	0.955623	OK
ENSG00000073754	-	-	ENSG00000073754	CD5L	-	1:157800703-157868046	-	-	0	0	0	OK	0	0	0	OK	0	0	0	OK	0	0	0	OK
ENSG00000073756	-	-	ENSG00000073756	PTGS2	-	1:186640922-186649559	-	-	2.40526	1.01677	3.79375	OK	137.566	105.44	169.692	OK	17.7855	13.0232	22.5478	OK	2.29224	0.906947	3.67753	OK
ENSG00000073792	-	-	ENSG00000073792	IGF2BP2	-	3:185361526-185542844	-	-	68.3685	34.8104	101.927	OK	57.8745	23.4773	92.2717	OK	39.6843	17.1553	62.2132	OK	34.8805	16.0642	53.6969	OK
ENSG00000073803	-	-	ENSG00000073803	MAP3K13	-	3:185000728-185216845	-	-	7.64172	2.82226	12.4612	OK	10.1463	5.05799	15.2345	OK	10.3549	5.27481	15.4349	OK	11.5599	5.72106	17.3987	OK
ENSG00000073849	-	-	ENSG00000073849	ST6GAL1	-	3:186648273-186796341	-	-	24.0894	12.7838	35.395	OK	17.812	10.8879	24.736	OK	20.5444	13.5283	27.5604	OK	14.753	9.05993	20.4461	OK
ENSG00000073861	-	-	ENSG00000073861	TBX21	-	17:45810609-45823485	-	-	0	0	0	OK	0	0	0	OK	0	0	0	OK	0	0	0	OK
ENSG00000073905	-	-	ENSG00000073905	VDAC1P1	-	X:80184998-80185846	-	-	0	0	0	OK	0.0879028	0	0.418507	OK	0	0	0	OK	0.0894129	0	0.43006	OK
ENSG00000073910	-	-	ENSG00000073910	FRY	-	13:32599450-32870794	-	-	21.6363	9.47354	33.7991	OK	11.5695	4.48046	18.6585	OK	21.853	7.55955	36.1465	OK	14.7839	7.96665	21.6011	OK
ENSG00000073921	-	-	ENSG00000073921	PICALM	-	11:85668726-85780924	-	-	63.8207	38.5598	89.0816	OK	86.3521	54.5609	118.143	OK	87.0186	59.7854	114.252	OK	74.721	50.848	98.5939	OK
ENSG00000073969	-	-	ENSG00000073969	NSF	-	17:44668034-44834830	-	-	7.25969	2.96181	11.5576	OK	10.8971	4.47241	17.3217	OK	6.67276	2.03203	11.3135	OK	5.67727	3.05613	8.29841	OK
ENSG00000074047	-	-	ENSG00000074047	GLI2	-	2:121493198-121750229	-	-	0.132179	0	1.92095	OK	0.0256166	0	1.82723	OK	0.0149094	0	1.79124	OK	0.132954	0	1.66831	OK
ENSG00000074054	-	-	ENSG00000074054	CLASP1	-	2:122095351-122407163	-	-	8.91114	5.60247	12.2198	OK	9.23707	5.50671	12.9674	OK	9.06068	5.61711	12.5042	OK	13.2397	5.31149	21.1678	OK
ENSG00000074071	-	-	ENSG00000074071	MRPS34	-	16:1821890-1823156	-	-	33.2183	22.7549	43.6817	OK	30.3394	20.9866	39.6923	OK	39.4031	27.1473	51.6588	OK	45.1948	32.5075	57.8822	OK
ENSG00000074181	-	-	ENSG00000074181	NOTCH3	-	19:15270443-15311792	-	-	0.0410443	0	1.29122	OK	1.00132	0	2.99583	OK	0.594289	0	1.94124	OK	0.176369	0	1.53378	OK
ENSG00000074201	-	-	ENSG00000074201	CLNS1A	-	11:77225980-77348850	-	-	46.498	29.601	63.3951	OK	35.6085	25.6512	45.5658	OK	33.857	22.06	45.6541	OK	34.077	24.6334	43.5207	OK
ENSG00000074211	-	-	ENSG00000074211	PPP2R2C	-	4:6322304-6565327	-	-	0	0	0	OK	0.0106939	0	1.21515	OK	0	0	0	OK	0.0183278	0	1.23039	OK
ENSG00000074219	-	-	ENSG00000074219	TEAD2	-	19:49834873-49891338	-	-	32.5916	23.4194	41.7639	OK	29.1666	21.0338	37.2995	OK	28.6824	20.4735	36.8912	OK	26.6151	18.9198	34.3105	OK
ENSG00000074266	-	-	ENSG00000074266	EED	-	11:85955585-85989855	-	-	11.4262	6.98219	15.8702	OK	9.26399	5.10829	13.4197	OK	8.93573	4.93841	12.9331	OK	8.88451	5.06515	12.7039	OK
ENSG00000074276	-	-	ENSG00000074276	CDHR2	-	5:175969511-176037134	-	-	0.957659	0	2.95219	OK	0.671107	0	2.50588	OK	0.116868	0	1.38337	OK	0.212447	0	1.53099	OK
ENSG00000074317	-	-	ENSG00000074317	SNCB	-	5:176047084-176057530	-	-	0	0	0	OK	0.0528243	0	1.00171	OK	0.24147	0	1.43189	OK	0	0	0	OK
ENSG00000074319	-	-	ENSG00000074319	TSG101	-	11:18477370-18548779	-	-	27.2996	15.5888	39.0105	OK	23.4346	14.9474	31.9218	OK	33.3762	20.3128	46.4396	OK	28.5042	17.7014	39.3071	OK
ENSG00000074356	-	-	ENSG00000074356	C17orf85	-	17:3714459-3749545	-	-	19.717	0	41.3366	OK	17.7202	7.19132	28.249	OK	13.7313	5.3072	22.1553	OK	15.5109	3.64899	27.3727	OK
ENSG00000074370	-	-	ENSG00000074370	ATP2A3	-	17:3827168-3867736	-	-	0.402225	0	3.02143	OK	0.083359	0	2.23018	OK	0.532819	0	3.12354	OK	0.115405	0	2.31466	OK
ENSG00000074410	-	-	ENSG00000074410	CA12	-	15:63613576-63674360	-	-	0.254978	0	1.31933	OK	0.239626	0	1.29189	OK	0.327738	0	1.52325	OK	0.152978	0	1.32051	OK
ENSG00000074416	-	-	ENSG00000074416	MGLL	-	3:127407908-127542051	-	-	13.0024	6.18157	19.8232	OK	12.6507	0	29.2782	OK	9.08928	3.97688	14.2017	OK	10.7874	0	24.2327	OK
ENSG00000074527	-	-	ENSG00000074527	NTN4	-	12:96043030-96184930	-	-	91.0638	53.2823	128.845	OK	78.6366	55.5719	101.701	OK	60.3535	45.0926	75.6145	OK	76.6171	48.3747	104.859	OK
ENSG00000074582	-	-	ENSG00000074582	BCS1L	-	2:219502638-219528166	-	-	5.0682	0.761419	9.37498	OK	10.6417	4.15819	17.1253	OK	14.1565	4.58695	23.726	OK	8.55481	3.42603	13.6836	OK
ENSG00000074590	-	-	ENSG00000074590	NUAK1	-	12:106457117-106533811	-	-	14.7761	4.4827	25.0695	OK	9.18531	6.32792	12.0427	OK	6.93923	3.42493	10.4535	OK	12.6757	5.34787	20.0035	OK
ENSG00000074603	-	-	ENSG00000074603	DPP8	-	15:65734800-65810042	-	-	7.38629	3.44264	11.3299	OK	9.42811	4.04652	14.8097	OK	9.73626	4.81534	14.6572	OK	12.5333	4.93846	20.128	OK
ENSG00000074621	-	-	ENSG00000074621	SLC24A1	-	15:65903703-66184329	-	-	2.32134	0	12.537	OK	2.59683	0	8.89862	OK	1.52556	0	5.74472	OK	4.08378	0	16.7146	OK
ENSG00000074657	-	-	ENSG00000074657	ZNF532	-	18:56529831-56653712	-	-	20.1066	9.3553	30.858	OK	21.7257	8.6942	34.7571	OK	29.0726	12.9492	45.196	OK	35.6795	17.1817	54.1773	OK
ENSG00000074660	-	-	ENSG00000074660	SCARF1	-	17:1537151-1549041	-	-	14.8593	10.0026	19.7161	OK	11.641	7.86493	15.4171	OK	16.7741	11.7028	21.8453	OK	16.9087	11.8757	21.9416	OK
ENSG00000074695	-	-	ENSG00000074695	LMAN1	-	18:56995054-57027194	-	-	37.0836	20.7009	53.4663	OK	39.253	24.7087	53.7974	OK	61.0473	39.7667	82.3279	OK	55.5414	41.0705	70.0124	OK
ENSG00000074696	-	-	ENSG00000074696	PTPLAD1	-	15:65822755-65870687	-	-	46.089	30.7338	61.4443	OK	43.7139	33.1734	54.2543	OK	34.0204	23.2536	44.7872	OK	37.2685	27.3281	47.2089	OK
ENSG00000074706	-	-	ENSG00000074706	IPCEF1	-	6:154331630-154677926	-	-	0.0923526	0	1.89618	OK	0.271438	0	2.14446	OK	0.201819	0	2.0067	OK	0.0738167	0	1.87174	OK
ENSG00000074755	-	-	ENSG00000074755	ZZEF1	-	17:3907738-4046314	-	-	8.07435	2.03305	14.1157	OK	5.43854	0.608137	10.269	OK	5.07606	0.0265762	10.1256	OK	3.89579	1.09915	6.69243	OK
ENSG00000074771	-	-	ENSG00000074771	NOX3	-	6:155716503-155777037	-	-	0	0	0	OK	0	0	0	OK	0	0	0	OK	0	0	0	OK
ENSG00000074800	-	-	ENSG00000074800	ENO1	-	1:8921060-8939953	-	-	653.147	440.219	866.076	OK	712.006	485.887	938.124	OK	559.116	387.641	730.591	OK	610.887	368.776	852.997	OK
ENSG00000074803	-	-	ENSG00000074803	SLC12A1	-	15:48481233-48596275	-	-	0	0	0	OK	0.000600343	0	1.34701	OK	0	0	0	OK	0	0	0	OK
ENSG00000074842	-	-	ENSG00000074842	C19orf10	-	19:4639529-4670382	-	-	92.6174	57.5751	127.66	OK	83.8601	49.8983	117.822	OK	145.589	98.1022	193.075	OK	175.27	118.566	231.974	OK
ENSG00000074855	-	-	ENSG00000074855	ANO8	-	19:17402939-17445638	-	-	1.31952	0	2.76299	OK	1.73837	0.219689	3.25704	OK	1.64119	0	3.31377	OK	2.33498	0.0865974	4.58335	OK
ENSG00000074935	-	-	ENSG00000074935	TUBE1	-	6:112375274-112408732	-	-	6.45275	2.62668	10.2788	OK	8.18282	3.17479	13.1909	OK	11.0643	5.85329	16.2754	OK	7.1064	3.39737	10.8154	OK
ENSG00000074964	-	-	ENSG00000074964	ARHGEF10L	-	1:17866329-18024369	-	-	1.41047	0	3.08042	OK	0.729714	0	2.21543	OK	1.0131	0	2.59166	OK	1.62853	0	3.27835	OK
ENSG00000074966	-	-	ENSG00000074966	TXK	-	4:48068409-48136273	-	-	0.538235	0	1.59606	OK	0.286549	0	1.31632	OK	0.32985	0	1.38174	OK	0.340855	0	1.40071	OK
ENSG00000075035	-	-	ENSG00000075035	WSCD2	-	12:108523247-108644314	-	-	0	0	0	OK	0	0	0	OK	0	0	0	OK	0	0	0	OK
ENSG00000075043	-	-	ENSG00000075043	KCNQ2	-	20:62037541-62103993	-	-	0	0	0	OK	0	0	0	OK	0	0	0	OK	0	0	0	OK
ENSG00000075073	-	-	ENSG00000075073	TACR2	-	10:71163658-71176623	-	-	0.295358	0	0.760439	OK	0.0386929	0	0.311448	OK	0.161409	0	0.546811	OK	0.145205	0	0.521794	OK
ENSG00000075089	-	-	ENSG00000075089	ACTR6	-	12:100550134-100660857	-	-	6.89408	2.32929	11.4589	OK	5.68703	2.00528	9.36879	OK	8.30436	4.28743	12.3213	OK	8.99658	3.38088	14.6123	OK
ENSG00000075131	-	-	ENSG00000075131	TIPIN	-	15:66628543-66679084	-	-	4.79016	2.38894	7.19138	OK	5.73537	3.40943	8.0613	OK	3.85033	2.00399	5.69667	OK	3.25927	1.68161	4.83694	OK
ENSG00000075142	-	-	ENSG00000075142	SRI	-	7:87834432-87936206	-	-	38.166	26.8869	49.445	OK	39.3646	27.8683	50.861	OK	41.1427	25.9679	56.3176	OK	42.7248	29.6273	55.8223	OK
ENSG00000075151	-	-	ENSG00000075151	EIF4G3	-	1:21132962-21503377	-	-	22.0506	6.62964	37.4716	OK	17.4656	7.31852	27.6127	OK	20.4507	12.0403	28.8612	OK	22.1067	7.09953	37.1138	OK
ENSG00000075188	-	-	ENSG00000075188	NUP37	-	12:102457132-102513902	-	-	12.5625	4.958	20.1669	OK	13.1941	4.04856	22.3397	OK	16.9339	4.49437	29.3734	OK	10.6399	5.7372	15.5425	OK
ENSG00000075213	-	-	ENSG00000075213	SEMA3A	-	7:83585092-84122040	-	-	0.581244	0	2.43035	OK	1.12758	0	3.34137	OK	1.26633	0	3.24168	OK	0.511955	0	2.39231	OK
ENSG00000075218	-	-	ENSG00000075218	GTSE1	-	22:46692637-46726707	-	-	7.59653	4.38929	10.8038	OK	3.79994	1.9891	5.61078	OK	6.07993	3.84681	8.31304	OK	3.82399	2.07876	5.56921	OK
ENSG00000075223	-	-	ENSG00000075223	SEMA3C	-	7:80371853-80551675	-	-	0	0	0	OK	0	0	0	OK	0.19213	0	2.18257	OK	0.0650218	0	2.01815	OK
ENSG00000075234	-	-	ENSG00000075234	TTC38	-	22:46663857-46689905	-	-	6.67177	1.85048	11.4931	OK	4.31412	1.51508	7.11316	OK	4.78472	2.31291	7.25654	OK	5.24525	2.07268	8.41783	OK
ENSG00000075239	-	-	ENSG00000075239	ACAT1	-	11:107879458-108018503	-	-	22.9768	14.2039	31.7497	OK	25.5975	14.4513	36.7438	OK	24.0512	12.9093	35.193	OK	26.8913	11.8003	41.9822	OK
ENSG00000075240	-	-	ENSG00000075240	GRAMD4	-	22:46971908-47075688	-	-	3.02825	0	6.91339	OK	15.7496	0	43.7285	OK	3.7379	0	7.75599	OK	3.79074	0	16.0472	OK
ENSG00000075275	-	-	ENSG00000075275	CELSR1	-	22:46756730-46933067	-	-	0.895685	0	1.79782	OK	1.08815	0.122423	2.05389	OK	0.940027	0	1.96916	OK	1.01166	0	2.39507	OK
ENSG00000075290	-	-	ENSG00000075290	WNT8B	-	10:102222797-102243501	-	-	0	0	0	OK	0	0	0	OK	0.0272415	0	0.213486	OK	0.0688109	0	0.287324	OK
ENSG00000075292	-	-	ENSG00000075292	ZNF638	-	2:71503690-71662199	-	-	29.9808	16.9271	43.0344	OK	31.9289	15.1593	48.6985	OK	25.8387	12.1043	39.5732	OK	32.0528	14.8751	49.2304	OK
ENSG00000075303	-	-	ENSG00000075303	SLC25A40	-	7:87462882-87538856	-	-	4.8378	0.660504	9.01511	OK	3.11979	0	6.59536	OK	5.26626	0.967554	9.56496	OK	4.01971	0	8.13752	OK
ENSG00000075336	-	-	ENSG00000075336	TIMM21	-	18:71815745-71826197	-	-	15.0182	8.59815	21.4383	OK	15.8228	9.10631	22.5392	OK	14.6466	7.82692	21.4662	OK	15.8422	9.41278	22.2716	OK
ENSG00000075340	-	-	ENSG00000075340	ADD2	-	2:70834749-70995357	-	-	0.0253187	0	1.52556	OK	0.194488	0	1.67396	OK	0.739665	0	2.67619	OK	0.16809	0	1.578	OK
ENSG00000075388	-	-	ENSG00000075388	FGF4	-	11:69587796-69590171	-	-	0	0	0	OK	0	0	0	OK	0	0	0	OK	0	0	0	OK
ENSG00000075391	-	-	ENSG00000075391	RASAL2	-	1:178060642-178448644	-	-	4.5012	2.95706	6.04535	OK	4.90261	2.79494	7.01028	OK	2.53884	0.711962	4.36572	OK	4.31745	2.01295	6.62196	OK
ENSG00000075399	-	-	ENSG00000075399	VPS9D1	-	16:89773541-89883065	-	-	3.76522	0	10.5257	OK	1.27168	0	3.94692	OK	1.92999	0	5.04306	OK	4.00319	0	9.1784	OK
ENSG00000075407	-	-	ENSG00000075407	ZNF37A	-	10:38383263-38414472	-	-	3.74968	1.57344	5.92593	OK	3.00695	0.898585	5.11531	OK	3.48749	1.28491	5.69007	OK	3.54624	0.542943	6.54953	OK
ENSG00000075413	-	-	ENSG00000075413	MARK3	-	14:103851728-103970168	-	-	39.5775	25.3779	53.7771	OK	43.2432	25.849	60.6374	OK	48.7756	24.9381	72.6131	OK	35.4763	20.1173	50.8354	OK
ENSG00000075415	-	-	ENSG00000075415	SLC25A3	-	12:98987368-98995946	-	-	384.602	275.208	493.996	OK	305.27	217.781	392.759	OK	433.458	305.473	561.443	OK	449.6	310.412	588.787	OK
ENSG00000075420	-	-	ENSG00000075420	FNDC3B	-	3:171757417-172119455	-	-	53.3101	22.7321	83.8881	OK	71.8979	31.4655	112.33	OK	87.6098	30.2739	144.946	OK	35.0637	20.7077	49.4196	OK
ENSG00000075426	-	-	ENSG00000075426	FOSL2	-	2:28607275-28640179	-	-	9.2028	6.41869	11.9869	OK	31.0178	21.842	40.1936	OK	13.3166	9.55333	17.0799	OK	8.53364	5.79328	11.274	OK
ENSG00000075429	-	-	ENSG00000075429	CACNG5	-	17:64831234-64881603	-	-	0	0	0	OK	0	0	0	OK	0	0	0	OK	0	0	0	OK
ENSG00000075461	-	-	ENSG00000075461	CACNG4	-	17:64961025-65029514	-	-	0	0	0	OK	0	0	0	OK	0	0	0	OK	0	0	0	OK
ENSG00000075539	-	-	ENSG00000075539	FRYL	-	4:48499377-48782339	-	-	18.7441	4.55559	32.9327	OK	18.4289	10.1074	26.7504	OK	22.6322	11.0903	34.1741	OK	15.7138	6.1649	25.2627	OK
ENSG00000075568	-	-	ENSG00000075568	TMEM131	-	2:98372798-98612388	-	-	11.0068	3.27775	18.7358	OK	10.3491	6.13743	14.5608	OK	11.7152	4.84232	18.5881	OK	7.82564	4.09435	11.5569	OK
ENSG00000075618	-	-	ENSG00000075618	FSCN1	-	7:5632438-5646286	-	-	144.93	111.302	178.559	OK	126.031	96.4858	155.577	OK	131.035	99.5754	162.495	OK	165.792	127.177	204.406	OK
ENSG00000075624	-	-	ENSG00000075624	ACTB	-	7:5566781-5603415	-	-	4696.1	3339.97	6052.22	OK	4833.23	3453.56	6212.91	OK	3732.23	2564.62	4899.84	OK	4137	2926.17	5347.83	OK
ENSG00000075643	-	-	ENSG00000075643	MOCOS	-	18:33767481-33852120	-	-	2.38869	0	6.6902	OK	0.684315	0	2.30305	OK	0.143269	0	1.1507	OK	0.459883	0	1.39255	OK
ENSG00000075651	-	-	ENSG00000075651	PLD1	-	3:171318194-171528740	-	-	21.4568	11.5834	31.3303	OK	22.439	12.2983	32.5796	OK	14.3667	7.41741	21.3161	OK	15.5943	9.09407	22.0945	OK
ENSG00000075673	-	-	ENSG00000075673	ATP12A	-	13:25254548-25285921	-	-	0	0	0	OK	0	0	0	OK	0	0	0	OK	0	0	0	OK
ENSG00000075702	-	-	ENSG00000075702	WDR62	-	19:36545782-36596008	-	-	1.45323	0	3.57364	OK	0.828239	0	1.87858	OK	1.06433	0	2.23322	OK	0.872853	0	1.98914	OK
ENSG00000075711	-	-	ENSG00000075711	DLG1	-	3:196769430-197030618	-	-	51.06	1.93065	100.189	OK	27.5045	5.40908	49.5998	OK	15.4553	1.98628	28.9244	OK	25.9238	0	54.4233	OK
ENSG00000075785	-	-	ENSG00000075785	RAB7A	-	3:128444964-128533639	-	-	124.655	84.493	164.817	OK	140.488	94.2533	186.722	OK	162.108	112.316	211.9	OK	148.644	101.367	195.921	OK
ENSG00000075790	-	-	ENSG00000075790	BCAP29	-	7:107220001-107269943	-	-	87.6912	0	181.926	OK	331.96	0	668.751	OK	274.291	0	580.456	OK	229.354	0	483.611	OK
ENSG00000075826	-	-	ENSG00000075826	SEC31B	-	10:102246398-102319755	-	-	3.63719	0	7.69233	OK	3.06843	0	6.1723	OK	3.43987	0	6.9793	OK	2.25252	0	4.97271	OK
ENSG00000075856	-	-	ENSG00000075856	SART3	-	12:108908961-108955176	-	-	10.7917	5.5557	16.0276	OK	10.0074	4.58846	15.4263	OK	11.4295	3.48243	19.3765	OK	8.78988	4.60826	12.9715	OK
ENSG00000075884	-	-	ENSG00000075884	ARHGAP15	-	2:143848930-144533642	-	-	0.166303	0	2.53319	OK	0.160953	0	2.55981	OK	0.0259236	0	3.05767	OK	0.0982672	0	2.47289	OK
ENSG00000075886	-	-	ENSG00000075886	TUBA3D	-	2:132222472-132250316	-	-	0	0	0	OK	0.0279587	0	0.790865	OK	0	0	0	OK	0	0	0	OK
ENSG00000075891	-	-	ENSG00000075891	PAX2	-	10:102495359-102589698	-	-	0	0	0	OK	0	0	0	OK	0	0	0	OK	0	0	0	OK
ENSG00000075914	-	-	ENSG00000075914	EXOSC7	-	3:44956748-45077563	-	-	12.9627	0.467147	25.4583	OK	10.0551	3.14102	16.9691	OK	11.5348	0	24.0417	OK	12.9707	0.67738	25.264	OK
ENSG00000075945	-	-	ENSG00000075945	KIFAP3	-	1:169890466-170054349	-	-	6.47177	3.69454	9.249	OK	6.3213	3.71104	8.93156	OK	5.57055	3.23561	7.9055	OK	5.60772	3.47506	7.74038	OK
ENSG00000075975	-	-	ENSG00000075975	MKRN2	-	3:12525930-12705725	-	-	9.16196	4.86169	13.4622	OK	8.87567	4.87741	12.8739	OK	10.1976	5.64234	14.7528	OK	9.9001	5.82299	13.9772	OK
ENSG00000076003	-	-	ENSG00000076003	MCM6	-	2:136597195-136633996	-	-	11.7208	6.79929	16.6424	OK	10.352	6.44598	14.2581	OK	10.8372	6.68866	14.9857	OK	8.58567	5.20123	11.9701	OK
ENSG00000076043	-	-	ENSG00000076043	REXO2	-	11:114262164-114321001	-	-	110.279	74.5201	146.038	OK	100.204	67.533	132.875	OK	94.6628	64.879	124.447	OK	83.3173	58.0053	108.629	OK
ENSG00000076053	-	-	ENSG00000076053	RBM7	-	11:114262164-114321001	-	-	13.2039	3.5991	22.8086	OK	19.7625	4.58877	34.9362	OK	17.5492	6.52548	28.5729	OK	16.3396	5.32078	27.3584	OK
ENSG00000076067	-	-	ENSG00000076067	RBMS2	-	12:56915712-56984745	-	-	24.7607	16.5259	32.9955	OK	27.4275	18.9569	35.8982	OK	19.7977	13.4922	26.1032	OK	19.9589	13.6952	26.2227	OK
ENSG00000076108	-	-	ENSG00000076108	BAZ2A	-	12:56989379-57030600	-	-	13.9785	4.85576	23.1013	OK	12.9671	4.20672	21.7274	OK	19.2902	6.48395	32.0964	OK	14.1426	4.56509	23.7201	OK
ENSG00000076201	-	-	ENSG00000076201	PTPN23	-	3:47422500-47454931	-	-	8.67296	5.56535	11.7806	OK	6.9568	2.89588	11.0177	OK	8.06586	4.07224	12.0595	OK	8.44828	3.10169	13.7949	OK
ENSG00000076242	-	-	ENSG00000076242	MLH1	-	3:37034822-37225180	-	-	22.3779	0	57.823	OK	12.3664	0	26.8616	OK	9.38856	0	19.3987	OK	8.82519	0	21.1904	OK
ENSG00000076248	-	-	ENSG00000076248	UNG	-	12:109535378-109548797	-	-	7.66597	4.86633	10.4656	OK	5.63338	3.24187	8.02489	OK	6.9371	2.44378	11.4304	OK	5.20629	2.98288	7.42969	OK
ENSG00000076258	-	-	ENSG00000076258	FMO4	-	1:171283346-171311223	-	-	0.612181	0	1.95643	OK	0.629737	0	2.17396	OK	0.118659	0	1.30601	OK	0.401156	0	1.6496	OK
ENSG00000076321	-	-	ENSG00000076321	KLHL20	-	1:173684079-173755840	-	-	6.22579	3.69839	8.75319	OK	7.62005	1.06878	14.1713	OK	8.35489	3.27082	13.439	OK	7.44448	3.28817	11.6008	OK
ENSG00000076344	-	-	ENSG00000076344	RGS11	-	16:284544-333003	-	-	0.730905	0	2.38205	OK	0.86226	0	2.45319	OK	0.591926	0	2.34231	OK	0.862612	0	2.99535	OK
ENSG00000076351	-	-	ENSG00000076351	SLC46A1	-	17:26684603-26734215	-	-	4.19494	0	9.6497	OK	6.82487	0	13.8944	OK	6.30352	0	13.4515	OK	6.9501	0.192636	13.7076	OK
ENSG00000076356	-	-	ENSG00000076356	PLXNA2	-	1:208195586-208417665	-	-	14.1047	7.02552	21.1838	OK	17.825	7.19627	28.4537	OK	31.8854	13.2815	50.4893	OK	30.6305	14.6723	46.5887	OK
ENSG00000076382	-	-	ENSG00000076382	SPAG5	-	17:26782769-26972472	-	-	8.9647	0	19.0523	OK	5.18462	0	11.0487	OK	11.0416	0	23.2453	OK	7.47441	0	18.8547	OK
ENSG00000076513	-	-	ENSG00000076513	ANKRD13A	-	12:110436990-110511491	-	-	15.2055	9.67363	20.7374	OK	11.3362	7.30868	15.3638	OK	11.6275	7.09199	16.1629	OK	12.2848	8.10484	16.4647	OK
ENSG00000076554	-	-	ENSG00000076554	TPD52	-	8:80830951-81143467	-	-	8.51121	3.59366	13.4288	OK	6.40936	1.63473	11.184	OK	5.92628	0.772232	11.0803	OK	5.62598	0.71167	10.5403	OK
ENSG00000076555	-	-	ENSG00000076555	ACACB	-	12:109549022-109706031	-	-	0.14665	0	2.71436	OK	0.555221	0	2.65938	OK	0.305763	0	3.21072	OK	0.78779	0	3.10248	OK
ENSG00000076604	-	-	ENSG00000076604	TRAF4	-	17:27071001-27077974	-	-	9.4208	4.55991	14.2817	OK	10.2113	4.12239	16.3003	OK	12.6768	5.53159	19.8219	OK	12.2109	4.74664	19.6752	OK
ENSG00000076641	-	-	ENSG00000076641	PAG1	-	8:81880044-82024303	-	-	0.0155015	0	1.5635	OK	0.0473812	0	1.5556	OK	0.410122	0	2.07433	OK	0.254877	0	1.83701	OK
ENSG00000076650	-	-	ENSG00000076650	GPATCH1	-	19:33571785-33621448	-	-	1.95969	0.661861	3.25753	OK	1.79836	0.64881	2.94791	OK	1.52946	0.535686	2.52323	OK	1.85592	0.876273	2.83557	OK
ENSG00000076662	-	-	ENSG00000076662	ICAM3	-	19:10444451-10450499	-	-	2.16171	0.136377	4.18704	OK	4.14103	1.2635	7.01856	OK	5.12749	1.81202	8.44296	OK	7.86046	3.62062	12.1003	OK
ENSG00000076685	-	-	ENSG00000076685	NT5C2	-	10:104678049-104953056	-	-	26.3444	0.196992	52.4918	OK	24.6514	11.909	37.3939	OK	31.5005	5.6438	57.3572	OK	26.6637	0	53.67	OK
ENSG00000076706	-	-	ENSG00000076706	MCAM	-	11:119179240-119192231	-	-	228.157	154.448	301.866	OK	257.937	129.89	385.983	OK	363.578	226.947	500.208	OK	375.433	242.862	508.004	OK
ENSG00000076716	-	-	ENSG00000076716	GPC4	-	X:132434130-132549518	-	-	0	0	0	OK	0	0	0	OK	0	0	0	OK	0	0	0	OK
ENSG00000076770	-	-	ENSG00000076770	MBNL3	-	X:131337052-131623996	-	-	2.69216	0	6.94212	OK	0.174558	0	1.44414	OK	0.259303	0	1.69817	OK	0.381633	0	2.16776	OK
ENSG00000076826	-	-	ENSG00000076826	CAMSAP3	-	19:7660787-7683190	-	-	0.226051	0	1.36873	OK	0.0310149	0	1.13674	OK	0.0210281	0	1.13317	OK	0.0276143	0	1.1276	OK
ENSG00000076864	-	-	ENSG00000076864	RAP1GAP	-	1:21922707-21995801	-	-	0	0	0	OK	0	0	0	OK	0	0	0	OK	0.00903715	0	2.20836	OK
ENSG00000076924	-	-	ENSG00000076924	XAB2	-	19:7684410-7694451	-	-	11.6663	7.38002	15.9525	OK	9.64322	6.05265	13.2338	OK	11.0356	7.18145	14.8897	OK	12.0321	7.99725	16.0669	OK
ENSG00000076928	-	-	ENSG00000076928	ARHGEF1	-	19:42387227-42434302	-	-	18.5706	7.83351	29.3078	OK	16.553	6.71266	26.3932	OK	22.0314	10.8219	33.2408	OK	28.1939	14.2618	42.1261	OK
ENSG00000076944	-	-	ENSG00000076944	STXBP2	-	19:7694622-7712759	-	-	9.89243	1.82466	17.9602	OK	9.68339	2.71169	16.6551	OK	9.14302	1.95278	16.3333	OK	11.4864	4.01829	18.9545	OK
ENSG00000076984	-	-	ENSG00000076984	MAP2K7	-	19:7968727-7979363	-	-	26.658	0	87.9195	OK	3.79942	0	7.94904	OK	5.45843	0	20.9737	OK	13.6315	0	39.352	OK
ENSG00000077009	-	-	ENSG00000077009	NMRK2	-	19:3933100-3942414	-	-	0	0	0	OK	0	0	0	OK	0	0	0	OK	0	0	0	OK
ENSG00000077044	-	-	ENSG00000077044	DGKD	-	2:234263152-234380750	-	-	1.86682	0	4.32387	OK	8.28878	0	20.7822	OK	8.04329	1.98088	14.1057	OK	9.64596	0	20.1153	OK
ENSG00000077063	-	-	ENSG00000077063	CTTNBP2	-	7:117105837-117514193	-	-	0	0	0	OK	0.0627018	0	2.44893	OK	0.00689131	0	2.40287	OK	0	0	0	OK
ENSG00000077080	-	-	ENSG00000077080	ACTL6B	-	7:100240719-100254084	-	-	0	0	0	OK	0	0	0	OK	0	0	0	OK	0	0	0	OK
ENSG00000077092	-	-	ENSG00000077092	RARB	-	3:25215822-25639423	-	-	4.79719	2.98881	6.60558	OK	7.08365	4.52778	9.63952	OK	6.77411	4.27446	9.27376	OK	8.56939	4.48113	12.6577	OK
ENSG00000077097	-	-	ENSG00000077097	TOP2B	-	3:25639474-25706430	-	-	39.7819	13.6307	65.9331	OK	43.294	18.1036	68.4844	OK	39.7178	20.4405	58.995	OK	30.2893	14.7553	45.8234	OK
ENSG00000077147	-	-	ENSG00000077147	TM9SF3	-	10:98277865-98347209	-	-	91.2944	31.4512	151.138	OK	91.8091	27.4379	156.18	OK	109.975	45.3907	174.56	OK	85.7938	27.6932	143.894	OK
ENSG00000077150	-	-	ENSG00000077150	NFKB2	-	10:104153866-104162281	-	-	5.16446	0.361466	9.96745	OK	12.013	5.63344	18.3926	OK	18.3119	9.62474	26.9991	OK	8.5523	3.95746	13.1471	OK
ENSG00000077152	-	-	ENSG00000077152	UBE2T	-	1:202300784-202311108	-	-	9.18877	5.03248	13.3451	OK	10.5795	6.3655	14.7935	OK	12.5855	7.53464	17.6364	OK	9.95464	6.13844	13.7708	OK
ENSG00000077157	-	-	ENSG00000077157	PPP1R12B	-	1:202317826-202679545	-	-	2.9134	0	7.5202	OK	1.5719	0	5.01328	OK	1.3284	0	4.03794	OK	0.989339	0	3.72339	OK
ENSG00000077232	-	-	ENSG00000077232	DNAJC10	-	2:183580998-183659191	-	-	37.3147	17.9532	56.6761	OK	34.596	22.7758	46.4163	OK	51.5688	33.7263	69.4114	OK	54.6791	37.8505	71.5078	OK
ENSG00000077235	-	-	ENSG00000077235	GTF3C1	-	16:27470875-27561234	-	-	20.6571	7.20308	34.1111	OK	27.873	11.7589	43.9871	OK	17.4211	3.91908	30.9231	OK	27.4895	11.5707	43.4083	OK
ENSG00000077238	-	-	ENSG00000077238	IL4R	-	16:27324988-27376099	-	-	14.1045	6.91135	21.2976	OK	11.8363	6.03775	17.6349	OK	15.6005	6.69856	24.5025	OK	26.6179	15.3019	37.934	OK
ENSG00000077254	-	-	ENSG00000077254	USP33	-	1:78161671-78225537	-	-	16.1102	8.25541	23.965	OK	16.5322	6.19154	26.8728	OK	14.4	5.95926	22.8407	OK	14.944	6.50346	23.3845	OK
ENSG00000077264	-	-	ENSG00000077264	PAK3	-	X:110187512-110470589	-	-	0.0115792	0	1.25387	OK	0.0512154	0	1.05337	OK	0.0245543	0	1.26847	OK	0.0086413	0	1.24688	OK
ENSG00000077274	-	-	ENSG00000077274	CAPN6	-	X:110488330-110513751	-	-	0	0	0	OK	0	0	0	OK	0	0	0	OK	0	0	0	OK
ENSG00000077279	-	-	ENSG00000077279	DCX	-	X:110537006-110655603	-	-	0.0177108	0	0.803014	OK	0	0	0	OK	0	0	0	OK	0.00345062	0	0.787709	OK
ENSG00000077312	-	-	ENSG00000077312	SNRPA	-	19:41197433-41271294	-	-	39.8583	23.2271	56.4896	OK	40.4749	23.6801	57.2697	OK	58.6623	16.5736	100.751	OK	44.3688	14.7696	73.968	OK
ENSG00000077327	-	-	ENSG00000077327	SPAG6	-	10:22634398-22743153	-	-	0	0	0	OK	0.0134807	0	1.38988	OK	0.0542452	0	1.5502	OK	0.0364986	0	1.41427	OK
ENSG00000077348	-	-	ENSG00000077348	EXOSC5	-	19:41768400-41930910	-	-	2.51705	0	13.5249	OK	7.05374	0	35.5806	OK	3.20473	0	15.8815	OK	1.75041	0	10.3136	OK
ENSG00000077380	-	-	ENSG00000077380	DYNC1I2	-	2:172543918-172604930	-	-	82.9692	57.7998	108.139	OK	94.8044	65.0439	124.565	OK	86.8057	59.702	113.909	OK	92.6522	63.3476	121.957	OK
ENSG00000077420	-	-	ENSG00000077420	APBB1IP	-	10:26727131-26856732	-	-	0	0	0	OK	0	0	0	OK	0	0	0	OK	0	0	0	OK
ENSG00000077454	-	-	ENSG00000077454	LRCH4	-	7:100169854-100205798	-	-	13.6286	8.65921	18.598	OK	13.2297	8.35208	18.1073	OK	21.194	13.8373	28.5508	OK	17.9894	11.7601	24.2187	OK
ENSG00000077458	-	-	ENSG00000077458	FAM76B	-	11:95502105-95565857	-	-	9.39436	0.398404	18.3903	OK	13.1062	2.71523	23.4973	OK	13.5153	1.78133	25.2493	OK	8.28839	1.09962	15.4771	OK
ENSG00000077463	-	-	ENSG00000077463	SIRT6	-	19:4174105-4182601	-	-	5.0587	1.22764	8.88976	OK	3.40255	0	7.14818	OK	5.03491	1.25191	8.81791	OK	4.88316	0.213821	9.55251	OK
ENSG00000077498	-	-	ENSG00000077498	TYR	-	11:88910619-89028927	-	-	0	0	0	OK	0.0501845	0	0.742277	OK	0.136053	0	1.31703	OK	0.0349667	0	0.71645	OK
ENSG00000077514	-	-	ENSG00000077514	POLD3	-	11:74202756-74380162	-	-	3.06249	0.73272	5.39227	OK	3.12858	0.899617	5.35754	OK	3.42196	1.32668	5.51723	OK	3.25849	0.839145	5.67784	OK
ENSG00000077522	-	-	ENSG00000077522	ACTN2	-	1:236849753-236927931	-	-	0.0508443	0	1.47065	OK	0.072546	0	1.37821	OK	0.0210758	0	1.44131	OK	0.0230157	0	1.38476	OK
ENSG00000077549	-	-	ENSG00000077549	CAPZB	-	1:19665266-19812066	-	-	110.397	84.8765	135.917	OK	100.043	76.7926	123.294	OK	110.685	84.8912	136.479	OK	118.765	90.9247	146.605	OK
ENSG00000077585	-	-	ENSG00000077585	GPR137B	-	1:236305831-236445319	-	-	10.9067	4.27071	17.5427	OK	7.77316	2.1843	13.362	OK	12.0079	4.44355	19.5723	OK	10.8995	5.44685	16.3522	OK
ENSG00000077616	-	-	ENSG00000077616	NAALAD2	-	11:89864682-89926062	-	-	0.192421	0	1.18915	OK	0.281357	0	1.31664	OK	0.470487	0	1.5333	OK	0.412432	0	1.45512	OK
ENSG00000077684	-	-	ENSG00000077684	JADE1	-	4:129730778-130037795	-	-	6.77091	3.12212	10.4197	OK	10.1847	2.32439	18.0451	OK	12.9304	6.18072	19.6801	OK	7.1419	2.39532	11.8885	OK
ENSG00000077713	-	-	ENSG00000077713	SLC25A43	-	X:118533022-118588441	-	-	6.97945	3.95818	10.0007	OK	8.15782	4.4888	11.8268	OK	9.11088	5.69928	12.5225	OK	9.57446	6.11617	13.0327	OK
ENSG00000077721	-	-	ENSG00000077721	UBE2A	-	X:118708500-118718381	-	-	37.5928	27.1077	48.0778	OK	38.7538	27.3448	50.1629	OK	33.6603	24.1932	43.1275	OK	32.8374	23.458	42.2168	OK
ENSG00000077782	-	-	ENSG00000077782	FGFR1	-	8:38268655-38326352	-	-	50.6209	29.8044	71.4373	OK	55.5551	34.9834	76.1269	OK	41.5832	25.3302	57.8363	OK	42.7133	25.7906	59.6361	OK
ENSG00000077800	-	-	ENSG00000077800	FKBP6	-	7:72742166-72772634	-	-	0	0	0	OK	0.0870084	0	1.10572	OK	0	0	0	OK	0.345774	0	1.3984	OK
ENSG00000077809	-	-	ENSG00000077809	GTF2I	-	7:74071993-74306731	-	-	83.8414	46.2278	121.455	OK	62.9078	32.694	93.1215	OK	53.9014	28.2868	79.516	OK	67.6972	31.8684	103.526	OK
ENSG00000077935	-	-	ENSG00000077935	SMC1B	-	22:45739943-45809500	-	-	0	0	0	OK	0.0033568	0	0.107721	OK	0	0	0	OK	0	0	0	OK
ENSG00000077942	-	-	ENSG00000077942	FBLN1	-	22:45898117-45997015	-	-	0.146808	0	2.57081	OK	0.191301	0	2.69119	OK	1.02063	0	3.63471	OK	0.165546	0	2.5769	OK
ENSG00000077943	-	-	ENSG00000077943	ITGA8	-	10:15555947-15762124	-	-	0.0699669	0	1.14417	OK	0.0304055	0	1.11215	OK	0.0250176	0	1.09396	OK	0.305768	0	1.88471	OK
ENSG00000077984	-	-	ENSG00000077984	CST7	-	20:24929865-24940564	-	-	0	0	0	OK	0	0	0	OK	0	0	0	OK	0	0	0	OK
ENSG00000078018	-	-	ENSG00000078018	MAP2	-	2:210288781-210598842	-	-	8.8808	1.16985	16.5918	OK	5.37857	2.42761	8.32953	OK	4.76054	2.14739	7.37369	OK	3.94311	0.911412	6.97481	OK
ENSG00000078043	-	-	ENSG00000078043	PIAS2	-	18:44388352-44627658	-	-	5.68771	1.73827	9.63714	OK	8.75663	2.53094	14.9823	OK	8.92602	4.37047	13.4816	OK	6.90917	3.05543	10.7629	OK
ENSG00000078053	-	-	ENSG00000078053	AMPH	-	7:38423304-38671167	-	-	0.604171	0	2.25234	OK	0.00859282	0	1.57628	OK	0.136107	0	1.69262	OK	0.290279	0	1.76229	OK
ENSG00000078061	-	-	ENSG00000078061	ARAF	-	X:47420515-47479252	-	-	12.328	5.54026	19.1158	OK	13.1118	6.63117	19.5924	OK	12.1502	5.1933	19.1071	OK	17.5184	8.25335	26.7835	OK
ENSG00000078070	-	-	ENSG00000078070	MCCC1	-	3:182733005-182833863	-	-	19.513	0	41.2692	OK	9.63422	2.2257	17.0428	OK	10.5787	4.22168	16.9357	OK	10.2201	3.42834	17.0119	OK
ENSG00000078081	-	-	ENSG00000078081	LAMP3	-	3:182840000-182881627	-	-	2.68198	0.749263	4.6147	OK	5.34097	1.7456	8.93634	OK	7.77639	2.91512	12.6377	OK	4.48307	1.35267	7.61346	OK
ENSG00000078098	-	-	ENSG00000078098	FAP	-	2:163016271-163101661	-	-	0.285843	0	2.03442	OK	0.305797	0	2.23215	OK	0.561754	0	2.31921	OK	1.39899	0	3.56964	OK
ENSG00000078114	-	-	ENSG00000078114	NEBL	-	10:21068901-21463977	-	-	0.60224	0	2.9939	OK	2.37967	0	6.05842	OK	0.575404	0	2.9692	OK	0.391855	0	2.48323	OK
ENSG00000078124	-	-	ENSG00000078124	ACER3	-	11:76571910-76737841	-	-	11.2728	4.50103	18.0445	OK	10.4743	3.35472	17.5939	OK	5.58657	1.07504	10.0981	OK	6.7701	1.80837	11.7318	OK
ENSG00000078140	-	-	ENSG00000078140	UBE2K	-	4:39699663-39784412	-	-	57.2284	36.7243	77.7324	OK	54.4007	30.6434	78.1581	OK	60.2443	39.3101	81.1785	OK	61.7855	41.26	82.311	OK
ENSG00000078142	-	-	ENSG00000078142	PIK3C3	-	18:39535170-39667794	-	-	42.4462	24.1479	60.7444	OK	33.2586	9.92445	56.5928	OK	34.5995	0	69.2385	OK	22.665	9.07185	36.2581	OK
ENSG00000078177	-	-	ENSG00000078177	N4BP2	-	4:40044536-40159872	-	-	0.983509	0.412262	1.55476	OK	1.27467	0.678069	1.87128	OK	3.23921	2.27913	4.19929	OK	1.23864	0.512678	1.96459	OK
ENSG00000078237	-	-	ENSG00000078237	C12orf5	-	12:4430370-4462338	-	-	19.7192	13.6957	25.7428	OK	18.7827	12.9723	24.5932	OK	19.1798	13.2536	25.1061	OK	15.564	10.419	20.709	OK
ENSG00000078246	-	-	ENSG00000078246	TULP3	-	12:2904118-3050306	-	-	18.4632	8.32619	28.6003	OK	16.2997	8.12883	24.4706	OK	22.2969	13.6223	30.9714	OK	14.1992	7.48719	20.9111	OK
ENSG00000078269	-	-	ENSG00000078269	SYNJ2	-	6:158402887-158520208	-	-	12.1616	7.61166	16.7115	OK	13.3486	8.44989	18.2473	OK	10.6206	5.19184	16.0494	OK	6.74049	4.07281	9.40816	OK
ENSG00000078295	-	-	ENSG00000078295	ADCY2	-	5:7396320-7830194	-	-	0.0628354	0	1.47066	OK	0.0567124	0	1.46344	OK	0.0826445	0	1.48444	OK	0.0329833	0	1.43285	OK
ENSG00000078304	-	-	ENSG00000078304	PPP2R5C	-	14:102228134-102394326	-	-	38.0255	23.1703	52.8807	OK	60.7976	31.9952	89.6	OK	51.4854	27.6971	75.2738	OK	39.7899	25.1511	54.4287	OK
ENSG00000078319	-	-	ENSG00000078319	PMS2P1	-	7:99905324-99997719	-	-	4.65764	0	9.52701	OK	6.94043	0	16.2925	OK	6.5617	0	18.3737	OK	6.43072	0	15.3852	OK
ENSG00000078328	-	-	ENSG00000078328	RBFOX1	-	16:5289802-7763340	-	-	0	0	0	OK	0	0	0	OK	0	0	0	OK	0	0	0	OK
ENSG00000078369	-	-	ENSG00000078369	GNB1	-	1:1716728-1822495	-	-	182.133	138.382	225.884	OK	186.438	142.257	230.619	OK	208.904	160.065	257.743	OK	190.13	144.69	235.57	OK
ENSG00000078399	-	-	ENSG00000078399	HOXA9	-	7:27202053-27219880	-	-	21.33	12.0319	30.6281	OK	12.2607	5.43541	19.086	OK	16.2874	9.86194	22.7128	OK	15.4969	9.24508	21.7487	OK
ENSG00000078401	-	-	ENSG00000078401	EDN1	-	6:12290595-12297427	-	-	229.59	177.538	281.642	OK	126.453	97.5669	155.338	OK	82.786	63.5139	102.058	OK	118.815	91.5992	146.03	OK
ENSG00000078403	-	-	ENSG00000078403	MLLT10	-	10:21823093-22032559	-	-	19.5677	0	59.0875	OK	11.0769	0	29.3808	OK	8.7776	0	35.5375	OK	8.30073	0	22.9712	OK
ENSG00000078487	-	-	ENSG00000078487	ZCWPW1	-	7:99998448-100031741	-	-	0.493359	0	1.9943	OK	0.935718	0	3.2735	OK	0.171176	0	1.18162	OK	0.473768	0	1.62767	OK
ENSG00000078549	-	-	ENSG00000078549	ADCYAP1R1	-	7:31092075-31151089	-	-	0	0	0	OK	0	0	0	OK	0	0	0	OK	0.0124723	0	1.1923	OK
ENSG00000078579	-	-	ENSG00000078579	FGF20	-	8:16849677-16859690	-	-	0	0	0	OK	0	0	0	OK	0	0	0	OK	0	0	0	OK
ENSG00000078589	-	-	ENSG00000078589	P2RY10	-	X:78200828-78217451	-	-	0	0	0	OK	0	0	0	OK	0	0	0	OK	0	0	0	OK
ENSG00000078596	-	-	ENSG00000078596	ITM2A	-	X:78615880-78623164	-	-	1.70163	0	5.28406	OK	1.4001	0	5.46894	OK	1.66235	0	4.43267	OK	1.66514	0	5.21424	OK
ENSG00000078618	-	-	ENSG00000078618	NRD1	-	1:52027537-52344477	-	-	51.0318	17.2935	84.77	OK	42.3318	17.705	66.9585	OK	45.2573	16.0746	74.44	OK	38.8551	15.8637	61.8466	OK
ENSG00000078668	-	-	ENSG00000078668	VDAC3	-	8:42249141-42263415	-	-	62.4481	43.1851	81.7111	OK	49.5518	34.335	64.7685	OK	43.7548	30.0279	57.4817	OK	45.687	32.24	59.1339	OK
ENSG00000078674	-	-	ENSG00000078674	PCM1	-	8:17780348-17885478	-	-	47.6198	21.9977	73.2419	OK	50.7997	20.1048	81.4946	OK	46.1492	10.7314	81.5671	OK	43.4948	15.6136	71.3761	OK
ENSG00000078687	-	-	ENSG00000078687	TNRC6C	-	17:76000248-76139049	-	-	2.39714	0	5.45623	OK	1.68484	0	3.37138	OK	1.79483	0	3.86083	OK	1.80149	0	3.96923	OK
ENSG00000078699	-	-	ENSG00000078699	CBFA2T2	-	20:32077880-32237842	-	-	4.12229	1.56361	6.68097	OK	4.29226	1.58734	6.99717	OK	3.3905	0.898264	5.88275	OK	3.4774	1.45437	5.50044	OK
ENSG00000078725	-	-	ENSG00000078725	BRINP1	-	9:121915735-122131745	-	-	0	0	0	OK	0	0	0	OK	0	0	0	OK	0	0	0	OK
ENSG00000078747	-	-	ENSG00000078747	ITCH	-	20:32951040-33099198	-	-	29.8138	0	71.2347	OK	25.7574	0	66.5042	OK	47.2703	0	112.326	OK	38.5079	0	104.717	OK
ENSG00000078795	-	-	ENSG00000078795	PKD2L2	-	5:137150021-137387650	-	-	0.369551	0	1.49587	OK	0.164829	0	1.04436	OK	0.329849	0	1.5151	OK	0.118075	0	0.873597	OK
ENSG00000078804	-	-	ENSG00000078804	TP53INP2	-	20:33284721-33413452	-	-	11.5136	6.20219	16.825	OK	15.6554	8.60186	22.709	OK	19.5599	12.5895	26.5303	OK	21.5355	11.1429	31.9281	OK
ENSG00000078808	-	-	ENSG00000078808	SDF4	-	1:1152287-1167411	-	-	59.5316	42.2401	76.8232	OK	52.3052	35.8197	68.7907	OK	70.268	51.3018	89.2342	OK	73.4256	53.7306	93.1205	OK
ENSG00000078814	-	-	ENSG00000078814	MYH7B	-	20:33563205-33680674	-	-	0	0	0	OK	0.101603	0	1.44835	OK	1.65472	0	5.02537	OK	0.0765262	0	1.37781	OK
ENSG00000078898	-	-	ENSG00000078898	BPIFB2	-	20:31595405-31611515	-	-	0	0	0	OK	0	0	0	OK	0	0	0	OK	0	0	0	OK
ENSG00000078900	-	-	ENSG00000078900	TP73	-	1:3547330-3663900	-	-	0	0	0	OK	0	0	0	OK	0	0	0	OK	0.183053	0	1.04998	OK
ENSG00000078902	-	-	ENSG00000078902	TOLLIP	-	11:1295600-1330884	-	-	9.11978	3.8382	14.4014	OK	8.14619	3.89015	12.4022	OK	12.7558	7.38832	18.1233	OK	11.2078	5.6396	16.776	OK
ENSG00000078967	-	-	ENSG00000078967	UBE2D4	-	7:43966036-44058774	-	-	3.57034	0.265496	6.87519	OK	4.5901	0.111086	9.06911	OK	4.624	0.338492	8.9095	OK	5.51716	0.883915	10.1504	OK
ENSG00000079101	-	-	ENSG00000079101	CLUL1	-	18:596987-712676	-	-	0.300375	0	2.66314	OK	0.727325	0	4.04444	OK	0.0173325	0	1.73071	OK	0.00738947	0	1.7428	OK
ENSG00000079102	-	-	ENSG00000079102	RUNX1T1	-	8:92967202-93115514	-	-	4.58197	0	9.65801	OK	3.17444	0	8.58776	OK	2.41227	0	7.47157	OK	2.59539	0	7.32069	OK
ENSG00000079112	-	-	ENSG00000079112	CDH17	-	8:95139398-95229531	-	-	0.0690899	0	0.951033	OK	0	0	0	OK	0.0165097	0	0.88166	OK	0.0261181	0	0.889396	OK
ENSG00000079134	-	-	ENSG00000079134	THOC1	-	18:158382-268050	-	-	38.062	11.018	65.106	OK	29.5061	5.82065	53.1915	OK	22.7156	6.08688	39.3443	OK	18.6635	4.65593	32.6711	OK
ENSG00000079150	-	-	ENSG00000079150	FKBP7	-	2:179328390-179343327	-	-	29.2504	17.8857	40.6151	OK	23.8053	15.6662	31.9444	OK	29.3371	19.5833	39.091	OK	42.8703	29.8553	55.8854	OK
ENSG00000079156	-	-	ENSG00000079156	OSBPL6	-	2:179059207-179264160	-	-	2.57619	0.376256	4.77613	OK	4.77375	0.498078	9.04942	OK	3.35653	0	8.37142	OK	1.05396	0	2.86594	OK
ENSG00000079215	-	-	ENSG00000079215	SLC1A3	-	5:36606456-36725297	-	-	0	0	0	OK	0	0	0	OK	0	0	0	OK	0	0	0	OK
ENSG00000079246	-	-	ENSG00000079246	XRCC5	-	2:216972186-217071026	-	-	124.108	64.3981	183.819	OK	102.586	71.4448	133.728	OK	100.428	61.882	138.973	OK	96.466	68.6428	124.289	OK
ENSG00000079257	-	-	ENSG00000079257	LXN	-	3:158362066-158410364	-	-	59.4437	39.9044	78.9829	OK	46.2258	30.0829	62.3688	OK	73.6063	50.9572	96.2554	OK	77.7786	55.1941	100.363	OK
ENSG00000079263	-	-	ENSG00000079263	SP140	-	2:230990025-231268447	-	-	0	0	0	OK	0.0933452	0	2.05109	OK	1.25249e-250	0	1.89151	OK	0	0	0	OK
ENSG00000079277	-	-	ENSG00000079277	MKNK1	-	1:47004367-47082563	-	-	15.6066	8.62326	22.59	OK	13.0448	5.98796	20.1016	OK	10.507	4.47702	16.537	OK	12.9882	5.668	20.3083	OK
ENSG00000079308	-	-	ENSG00000079308	TNS1	-	2:218664511-218867718	-	-	2.99385	0.226677	5.76102	OK	3.07308	0	6.79946	OK	2.30876	0	5.01065	OK	2.09389	0	4.87771	OK
ENSG00000079313	-	-	ENSG00000079313	REXO1	-	19:1815247-1848452	-	-	13.2219	1.60088	24.8429	OK	5.05195	0	10.7389	OK	12.1987	0	26.6523	OK	9.44609	1.9886	16.9036	OK
ENSG00000079332	-	-	ENSG00000079332	SAR1A	-	10:71907044-71930279	-	-	95.1384	53.0996	137.177	OK	138.219	83.7351	192.704	OK	112.74	68.026	157.453	OK	103.829	60.9414	146.716	OK
ENSG00000079335	-	-	ENSG00000079335	CDC14A	-	1:100810032-100985833	-	-	3.37512	2.07739	4.67285	OK	5.37648	3.61432	7.13863	OK	10.35	7.21915	13.4808	OK	6.30503	4.26366	8.34639	OK
ENSG00000079337	-	-	ENSG00000079337	RAPGEF3	-	12:48099867-48231681	-	-	6.07953	0	13.003	OK	3.51924	0	7.50966	OK	5.41821	0.722805	10.1136	OK	4.54516	0	10.1747	OK
ENSG00000079385	-	-	ENSG00000079385	CEACAM1	-	19:42901279-43156507	-	-	3.22947	0	7.34942	OK	1.77336	0	5.3884	OK	1.15652	0	4.55529	OK	2.37414	0	7.36188	OK
ENSG00000079387	-	-	ENSG00000079387	SENP1	-	12:48436680-48540187	-	-	3.29852	1.15181	5.44522	OK	3.51798	1.19201	5.84394	OK	4.52319	1.39289	7.65349	OK	3.26797	1.11992	5.41601	OK
ENSG00000079393	-	-	ENSG00000079393	DUSP13	-	10:76854191-76941881	-	-	0	0	0	OK	0	0	0	OK	0	0	0	OK	0	0	0	OK
ENSG00000079432	-	-	ENSG00000079432	CIC	-	19:42772688-42799949	-	-	12.7972	5.28236	20.3121	OK	6.13204	3.38932	8.87475	OK	12.7204	7.38478	18.056	OK	13.5839	7.02094	20.1469	OK
ENSG00000079435	-	-	ENSG00000079435	LIPE	-	19:42901279-43156507	-	-	1.22715	0	3.40674	OK	2.3299	0	7.0314	OK	2.12158	0	5.41959	OK	3.69473	0	8.69333	OK
ENSG00000079459	-	-	ENSG00000079459	FDFT1	-	8:11653081-11696818	-	-	78.5257	57.7313	99.3201	OK	73.0992	51.0745	95.1238	OK	63.8151	47.3121	80.318	OK	71.3617	47.5537	95.1697	OK
ENSG00000079462	-	-	ENSG00000079462	PAFAH1B3	-	19:42801184-42814973	-	-	11.2668	4.17297	18.3606	OK	7.88326	1.4796	14.2869	OK	9.36094	3.47997	15.2419	OK	8.7312	2.5886	14.8738	OK
ENSG00000079482	-	-	ENSG00000079482	OPHN1	-	X:67262185-67653755	-	-	2.61899	0	8.54492	OK	1.30863	0	122.659	OK	2.23295	0	5.88867	OK	1.7408	0	4.80738	OK
ENSG00000079557	-	-	ENSG00000079557	AFM	-	4:74347399-74369691	-	-	0	0	0	OK	0	0	0	OK	0	0	0	OK	0	0	0	OK
ENSG00000079616	-	-	ENSG00000079616	KIF22	-	16:29802039-29816706	-	-	13.292	8.33457	18.2494	OK	9.86094	5.20847	14.5134	OK	13.242	5.44983	21.0342	OK	7.52894	4.69356	10.3643	OK
ENSG00000079689	-	-	ENSG00000079689	SCGN	-	6:25652463-25702011	-	-	0	0	0	OK	0	0	0	OK	0	0	0	OK	0	0	0	OK
ENSG00000079691	-	-	ENSG00000079691	LRRC16A	-	6:25279305-25620758	-	-	0.599647	0	1.42559	OK	0.793044	0	1.98543	OK	0.836091	0	2.26861	OK	0.502828	0	1.42814	OK
ENSG00000079739	-	-	ENSG00000079739	PGM1	-	1:63906440-64125916	-	-	3.85691	0.702265	7.01155	OK	2.55028	0.555051	4.54551	OK	3.79508	0.357684	7.23248	OK	5.4192	2.73641	8.10198	OK
ENSG00000079785	-	-	ENSG00000079785	DDX1	-	2:15731301-15771235	-	-	39.072	26.5446	51.5994	OK	44.5499	25.9566	63.1432	OK	38.8866	25.2723	52.5008	OK	43.1169	27.6287	58.6051	OK
ENSG00000079805	-	-	ENSG00000079805	DNM2	-	19:10828754-10946994	-	-	30.0519	15.7726	44.3311	OK	25.0209	13.3039	36.7379	OK	37.764	20.7338	54.7942	OK	32.9947	17.31	48.6793	OK
ENSG00000079819	-	-	ENSG00000079819	EPB41L2	-	6:131160486-131384462	-	-	33.9441	11.5362	56.352	OK	36.465	16.1205	56.8095	OK	31.9219	13.4661	50.3778	OK	18.3733	6.17015	30.5764	OK
ENSG00000079841	-	-	ENSG00000079841	RIMS1	-	6:72596405-73112845	-	-	0.0233564	0	0.794791	OK	0.101919	0	0.742295	OK	0.210297	0	0.707559	OK	0.00401451	0	0.773242	OK
ENSG00000079931	-	-	ENSG00000079931	MOXD1	-	6:132617193-132722684	-	-	0	0	0	OK	0	0	0	OK	0	0	0	OK	0.0428827	0	0.703794	OK
ENSG00000079950	-	-	ENSG00000079950	STX7	-	6:132767005-132834337	-	-	9.63237	1.19346	18.0713	OK	8.62082	4.87114	12.3705	OK	10.2438	3.98246	16.5052	OK	8.202	4.29809	12.1059	OK
ENSG00000079974	-	-	ENSG00000079974	RABL2B	-	22:51195375-51239737	-	-	4.38429	0	8.85977	OK	2.79356	0.299344	5.28778	OK	4.67596	0	9.57793	OK	3.92459	0.113711	7.73547	OK
ENSG00000079999	-	-	ENSG00000079999	KEAP1	-	19:10596795-10614417	-	-	13.3199	7.77394	18.8659	OK	10.0168	6.26001	13.7737	OK	12.436	5.92747	18.9446	OK	13.5107	7.14719	19.8742	OK
ENSG00000080007	-	-	ENSG00000080007	DDX43	-	6:74078277-74161999	-	-	0	0	0	OK	0.491106	0	1.76905	OK	1.51427	0	3.91771	OK	0.194535	0	1.15582	OK
ENSG00000080031	-	-	ENSG00000080031	PTPRH	-	19:55692615-55720874	-	-	0	0	0	OK	0.0649984	0	1.19234	OK	0.0920896	0	1.36813	OK	0.24642	0	1.39893	OK
ENSG00000080166	-	-	ENSG00000080166	DCT	-	13:95089557-95131936	-	-	0	0	0	OK	0	0	0	OK	0	0	0	OK	0	0	0	OK
ENSG00000080189	-	-	ENSG00000080189	SLC35C2	-	20:44978166-44993043	-	-	16.3695	9.85929	22.8798	OK	19.6458	11.7675	27.524	OK	22.9163	14.2211	31.6115	OK	26.8518	11.9598	41.7438	OK
ENSG00000080200	-	-	ENSG00000080200	CRYBG3	-	3:97595818-97691301	-	-	1.812	0.217617	3.40638	OK	1.55494	0.333391	2.77649	OK	1.32821	0.270645	2.38578	OK	1.39566	0.0953471	2.69597	OK
ENSG00000080224	-	-	ENSG00000080224	EPHA6	-	3:96533424-97471304	-	-	0	0	0	OK	0	0	0	OK	0	0	0	OK	0.0330119	0	1.21634	OK
ENSG00000080293	-	-	ENSG00000080293	SCTR	-	2:120197418-120282070	-	-	0	0	0	OK	0	0	0	OK	0	0	0	OK	0	0	0	OK
ENSG00000080298	-	-	ENSG00000080298	RFX3	-	9:3218296-3526004	-	-	2.66713	0.504072	4.83019	OK	2.88805	0.875308	4.90079	OK	3.05813	0.749519	5.36674	OK	2.99206	0.992051	4.99207	OK
ENSG00000080345	-	-	ENSG00000080345	RIF1	-	2:152266396-152591001	-	-	6.09116	3.13451	9.04781	OK	7.98672	3.26832	12.7051	OK	6.62915	3.00142	10.2569	OK	5.14808	2.14886	8.14731	OK
ENSG00000080371	-	-	ENSG00000080371	RAB21	-	12:72148653-72184699	-	-	13.4601	3.51419	23.406	OK	17.088	5.90677	28.2692	OK	22.2468	9.92826	34.5654	OK	16.1806	5.63166	26.7296	OK
ENSG00000080493	-	-	ENSG00000080493	SLC4A4	-	4:72053002-72437804	-	-	0	0	0	OK	0	0	0	OK	0	0	0	OK	0	0	0	OK
ENSG00000080503	-	-	ENSG00000080503	SMARCA2	-	9:2015341-2193624	-	-	20.9678	8.52351	33.412	OK	18.1252	9.19221	27.0583	OK	24.5557	12.609	36.5024	OK	21.5339	11.1611	31.9067	OK
ENSG00000080511	-	-	ENSG00000080511	RDH8	-	19:10123924-10132955	-	-	0	0	0	OK	0	0	0	OK	0	0	0	OK	0	0	0	OK
ENSG00000080546	-	-	ENSG00000080546	SESN1	-	6:109307639-109416022	-	-	8.78691	5.43138	12.1424	OK	4.767	1.52997	8.00404	OK	4.9363	2.45612	7.41648	OK	6.33278	2.82804	9.83752	OK
ENSG00000080561	-	-	ENSG00000080561	MID2	-	X:107068984-107179210	-	-	5.81303	2.60454	9.02152	OK	3.59541	1.79629	5.39453	OK	2.0699	0.552184	3.58761	OK	2.63323	0.854044	4.41241	OK
ENSG00000080572	-	-	ENSG00000080572	PIH1D3	-	X:106449861-106487473	-	-	0	0	0	OK	0	0	0	OK	0	0	0	OK	0	0	0	OK
ENSG00000080573	-	-	ENSG00000080573	COL5A3	-	19:10070236-10121147	-	-	0	0	0	OK	0	0	0	OK	0	0	0	OK	0	0	0	OK
ENSG00000080603	-	-	ENSG00000080603	SRCAP	-	16:30709029-30787628	-	-	7.83499	4.29408	11.3759	OK	7.51678	3.2738	11.7598	OK	8.0177	3.31649	12.7189	OK	7.75468	2.36553	13.1438	OK
ENSG00000080608	-	-	ENSG00000080608	KIAA0020	-	9:2717501-2844241	-	-	10.7112	5.51054	15.9119	OK	11.4054	6.5192	16.2915	OK	11.5619	7.2569	15.8669	OK	11.9405	7.7056	16.1754	OK
ENSG00000080618	-	-	ENSG00000080618	CPB2	-	13:46626940-46687467	-	-	0	0	0	OK	0.0176383	0	0.27739	OK	0.101955	0	0.497447	OK	0.0931168	0	0.397498	OK
ENSG00000080644	-	-	ENSG00000080644	CHRNA3	-	15:78857861-78913637	-	-	1.82567	0	5.28459	OK	0.181022	0	1.95527	OK	0.668477	0	2.83725	OK	0.529095	0	3.14535	OK
ENSG00000080709	-	-	ENSG00000080709	KCNN2	-	5:113696641-114004107	-	-	0.172795	0	1.10422	OK	0.924682	0	1.95854	OK	1.97517	0.709157	3.24117	OK	1.83178	0.626797	3.03675	OK
ENSG00000080802	-	-	ENSG00000080802	CNOT4	-	7:135046546-135194875	-	-	13.9337	9.10009	18.7673	OK	12.343	8.10201	16.5839	OK	11.6984	7.59652	15.8003	OK	11.5675	7.33382	15.8012	OK
ENSG00000080815	-	-	ENSG00000080815	PSEN1	-	14:73603125-73690399	-	-	21.9138	13.3609	30.4667	OK	27.5999	15.0175	40.1822	OK	26.333	15.8611	36.8048	OK	20.2202	13.1657	27.2748	OK
ENSG00000080819	-	-	ENSG00000080819	CPOX	-	3:98216447-98312567	-	-	6.572	2.2982	10.8458	OK	7.9967	0	16.0397	OK	7.68894	0.598356	14.7795	OK	7.82584	0.912862	14.7388	OK
ENSG00000080822	-	-	ENSG00000080822	CLDND1	-	3:98216447-98312567	-	-	74.4028	47.3131	101.492	OK	86.266	50.272	122.26	OK	91.9504	55.471	128.43	OK	92.3446	52.343	132.346	OK
ENSG00000080823	-	-	ENSG00000080823	MOK	-	14:102547074-102771537	-	-	4.78202	0	33.5103	OK	3.39061	0	23.713	OK	3.64405	0	25.7906	OK	2.41473	0	20.5039	OK
ENSG00000080824	-	-	ENSG00000080824	HSP90AA1	-	14:102547074-102771537	-	-	243.17	109.713	376.628	OK	261.462	106.926	415.999	OK	246.235	69.1567	423.313	OK	260.054	59.9621	460.146	OK
ENSG00000080839	-	-	ENSG00000080839	RBL1	-	20:35624751-35725581	-	-	3.72729	1.46119	5.99338	OK	4.58002	1.00685	8.15319	OK	2.19655	0.758429	3.63466	OK	2.41208	0.690225	4.13394	OK
ENSG00000080845	-	-	ENSG00000080845	DLGAP4	-	20:34894257-35274619	-	-	80.7072	39.6664	121.748	OK	77.9516	38.4835	117.42	OK	65.1363	35.161	95.1116	OK	78.5276	42.4261	114.629	OK
ENSG00000080854	-	-	ENSG00000080854	IGSF9B	-	11:133778458-133826880	-	-	0.0525102	0	1.56592	OK	0.283467	0	2.0895	OK	0.0299741	0	1.5337	OK	0.0106423	0	1.50792	OK
ENSG00000080910	-	-	ENSG00000080910	CFHR2	-	1:196788886-196928356	-	-	0	0	0	OK	0	0	0	OK	0	0	0	OK	0	0	0	OK
ENSG00000080947	-	-	ENSG00000080947	CROCCP3	-	1:16787442-16825752	-	-	0.809235	0	2.40024	OK	1.1741	0	3.56728	OK	0.744176	0	2.3682	OK	1.33635	0	3.08001	OK
ENSG00000080986	-	-	ENSG00000080986	NDC80	-	18:2571509-2616634	-	-	8.53625	3.97405	13.0984	OK	8.04012	2.78941	13.2908	OK	8.32238	3.59752	13.0472	OK	5.77479	1.76704	9.78255	OK
ENSG00000081014	-	-	ENSG00000081014	AP4E1	-	15:51200868-51298097	-	-	3.649	0.195369	7.10263	OK	5.20802	2.03599	8.38005	OK	4.84871	1.49179	8.20563	OK	2.97057	1.22879	4.71234	OK
ENSG00000081019	-	-	ENSG00000081019	RSBN1	-	1:114304453-114456708	-	-	2.66182	0.917404	4.40623	OK	3.61444	0.483778	6.74511	OK	2.93409	1.21756	4.65063	OK	3.0494	0.722389	5.3764	OK
ENSG00000081026	-	-	ENSG00000081026	MAGI3	-	1:113933370-114228545	-	-	2.22702	0.770124	3.68392	OK	2.30053	0.747967	3.8531	OK	2.19809	0.467788	3.92839	OK	2.07277	0.171606	3.97394	OK
ENSG00000081041	-	-	ENSG00000081041	CXCL2	-	4:74962751-74965010	-	-	4.54674	0.950775	8.14271	OK	107.442	74.9655	139.919	OK	3.64668	0.281009	7.01236	OK	2.51847	0.0957759	4.94116	OK
ENSG00000081051	-	-	ENSG00000081051	AFP	-	4:74296854-74321891	-	-	0	0	0	OK	0	0	0	OK	0	0	0	OK	0	0	0	OK
ENSG00000081052	-	-	ENSG00000081052	COL4A4	-	2:227867426-228028829	-	-	0.0147122	0	0.0932225	OK	0	0	0	OK	0.00710014	0	0.0792486	OK	0.00576239	0	0.0776848	OK
ENSG00000081059	-	-	ENSG00000081059	TCF7	-	5:133450401-133706738	-	-	0.321366	0	2.87259	OK	0.663046	0	4.47635	OK	1.15807	0	6.77787	OK	0.802251	0	6.4665	OK
ENSG00000081087	-	-	ENSG00000081087	OSTM1	-	6:108362612-108487058	-	-	8.73547	4.066	13.4049	OK	12.1728	7.29288	17.0527	OK	12.615	7.7831	17.4469	OK	13.4613	7.40905	19.5135	OK
ENSG00000081138	-	-	ENSG00000081138	CDH7	-	18:63417487-63548638	-	-	0	0	0	OK	0.0236591	0	0.531164	OK	0.0485811	0	0.564827	OK	0.00769018	0	0.513348	OK
ENSG00000081148	-	-	ENSG00000081148	IMPG2	-	3:100941389-101039404	-	-	0.170391	0.0441025	0.29668	OK	0.127542	0.0183961	0.236687	OK	0.10455	0.00447968	0.20462	OK	0.0951362	0.00204252	0.18823	OK
ENSG00000081154	-	-	ENSG00000081154	PCNP	-	3:101292938-101313281	-	-	55.6795	39.2714	72.0877	OK	55.1858	40.7985	69.5732	OK	59.7036	44.1777	75.2296	OK	44.7959	32.4977	57.0941	OK
ENSG00000081177	-	-	ENSG00000081177	EXD2	-	14:69649736-69821183	-	-	7.11458	4.27901	9.95015	OK	6.8208	4.01331	9.62829	OK	8.39108	4.42832	12.3538	OK	7.39586	3.95309	10.8386	OK
ENSG00000081181	-	-	ENSG00000081181	ARG2	-	14:68086514-68162531	-	-	7.7983	0	19.5063	OK	10.7284	0	24.1902	OK	16.0671	0	35.2497	OK	14.3788	0	29.9776	OK
ENSG00000081189	-	-	ENSG00000081189	MEF2C	-	5:87803362-88762215	-	-	11.247	5.92802	16.566	OK	20.7611	11.2227	30.2995	OK	74.2395	48.7977	99.6813	OK	50.478	32.7942	68.1619	OK
ENSG00000081237	-	-	ENSG00000081237	PTPRC	-	1:198607800-198726545	-	-	0	0	0	OK	0	0	0	OK	0.0248068	0	2.63434	OK	0	0	0	OK
ENSG00000081248	-	-	ENSG00000081248	CACNA1S	-	1:201004223-201081694	-	-	0	0	0	OK	0	0	0	OK	0	0	0	OK	0	0	0	OK
ENSG00000081277	-	-	ENSG00000081277	PKP1	-	1:201252579-201302121	-	-	0	0	0	OK	0	0	0	OK	0.00718333	0	0.731571	OK	0	0	0	OK
ENSG00000081307	-	-	ENSG00000081307	UBA5	-	3:132276981-132593067	-	-	14.6063	7.16573	22.0469	OK	14.3762	6.93424	21.8182	OK	19.6874	10.1523	29.2225	OK	12.0926	6.19819	17.987	OK
ENSG00000081320	-	-	ENSG00000081320	STK17B	-	2:196998289-197041227	-	-	2.01995	0.563879	3.47602	OK	2.56276	1.103	4.02252	OK	3.2355	1.26976	5.20124	OK	2.09012	0.755453	3.42479	OK
ENSG00000081377	-	-	ENSG00000081377	CDC14B	-	9:99212482-99382112	-	-	0.739647	0	2.53127	OK	0.686259	0	2.46881	OK	1.18258	0	3.17264	OK	1.37896	0	3.35057	OK
ENSG00000081386	-	-	ENSG00000081386	ZNF510	-	9:99518146-99540411	-	-	1.86312	0.301675	3.42456	OK	1.31468	0.156126	2.47324	OK	2.05085	0.669371	3.43234	OK	1.50404	0.517196	2.49089	OK
ENSG00000081479	-	-	ENSG00000081479	LRP2	-	2:169983618-170219195	-	-	0	0	0	OK	0.00283867	0	1.12198	OK	0	0	0	OK	0	0	0	OK
ENSG00000081665	-	-	ENSG00000081665	ZNF506	-	19:19868174-19945736	-	-	3.6845	0.666871	6.70212	OK	2.43527	0	5.27586	OK	3.26754	0.358218	6.17686	OK	3.32626	0.853456	5.79906	OK
ENSG00000081692	-	-	ENSG00000081692	JMJD4	-	1:227916239-227968927	-	-	4.70595	0.474511	8.93738	OK	3.51397	0.49756	6.53038	OK	4.46092	1.27438	7.64746	OK	3.55127	0.395138	6.7074	OK
ENSG00000081721	-	-	ENSG00000081721	DUSP12	-	1:161719547-161727028	-	-	8.67703	5.01516	12.3389	OK	8.77264	5.07141	12.4739	OK	8.99223	4.76572	13.2188	OK	11.0968	6.2438	15.9497	OK
ENSG00000081760	-	-	ENSG00000081760	AACS	-	12:125549924-125627873	-	-	10.1214	2.95228	17.2906	OK	9.67325	3.98169	15.3648	OK	12.057	3.93211	20.1819	OK	9.7739	3.38139	16.1664	OK
ENSG00000081791	-	-	ENSG00000081791	KIAA0141	-	5:141303372-141321612	-	-	15.5159	8.32468	22.7072	OK	15.9644	8.92408	23.0047	OK	18.8683	8.84063	28.896	OK	15.5046	9.092	21.9171	OK
ENSG00000081800	-	-	ENSG00000081800	SLC13A1	-	7:122753584-122840040	-	-	0	0	0	OK	0.00835595	0	0.277055	OK	0	0	0	OK	0.00748323	0	0.275066	OK
ENSG00000081803	-	-	ENSG00000081803	CADPS2	-	7:121958480-122526813	-	-	10.1256	6.14615	14.1051	OK	10.7202	7.33724	14.1032	OK	11.4161	7.91385	14.9183	OK	17.8488	12.0302	23.6674	OK
ENSG00000081818	-	-	ENSG00000081818	PCDHB4	-	5:140501580-140505201	-	-	0.0570053	0	0.200416	OK	0.079084	0	0.262555	OK	0.0275557	0	0.129638	OK	0.084393	0	0.278023	OK
ENSG00000081842	-	-	ENSG00000081842	PCDHA6	-	5:140165875-140391936	-	-	7.14552e-09	0	0.142191	OK	0.0758983	0	0.27227	OK	1.4771e-26	0	0.144385	OK	1.06466e-10	0	0.118633	OK
ENSG00000081853	-	-	ENSG00000081853	PCDHGA2	-	5:140710251-140892546	-	-	0.982334	0	3.04339	OK	0.392338	0	1.74564	OK	0.861154	0	2.78133	OK	1.16631	0	3.84125	OK
ENSG00000081870	-	-	ENSG00000081870	HSPB11	-	1:54382246-54411602	-	-	25.7744	17.2261	34.3227	OK	21.398	14.0432	28.7528	OK	24.1026	15.8253	32.3798	OK	21.1143	13.7364	28.4922	OK
ENSG00000081913	-	-	ENSG00000081913	PHLPP1	-	18:60382671-60647666	-	-	2.59962	0.404146	4.7951	OK	2.41771	0	6.11502	OK	1.69031	0	3.45737	OK	3.13873	0.703411	5.57404	OK
ENSG00000081923	-	-	ENSG00000081923	ATP8B1	-	18:55297533-55470333	-	-	24.0691	17.1308	31.0074	OK	31.1138	16.744	45.4836	OK	49.5985	29.6219	69.575	OK	47.5119	25.3931	69.6306	OK
ENSG00000081985	-	-	ENSG00000081985	IL12RB2	-	1:67773046-67862583	-	-	0	0	0	OK	0.271481	0	1.28514	OK	0.0136439	0	0.857288	OK	0.183337	0	1.0045	OK
ENSG00000082014	-	-	ENSG00000082014	SMARCD3	-	7:150929574-150974982	-	-	1.53235	0	5.20114	OK	1.91763	0	6.5717	OK	2.08974	0	7.18032	OK	1.37675	0	4.85703	OK
ENSG00000082068	-	-	ENSG00000082068	WDR70	-	5:37379313-37753537	-	-	10.8278	4.80054	16.855	OK	9.20806	2.99881	15.4173	OK	7.00025	1.94355	12.057	OK	7.80111	1.60872	13.9935	OK
ENSG00000082074	-	-	ENSG00000082074	FYB	-	5:39105337-39274630	-	-	0	0	0	OK	0.00677512	0	1.63891	OK	0	0	0	OK	0.00772948	0	1.63693	OK
ENSG00000082126	-	-	ENSG00000082126	MPP4	-	2:202509592-202563417	-	-	2.81621	1.54061	4.09181	OK	3.67335	2.01607	5.33062	OK	3.25545	1.26181	5.24909	OK	5.23753	2.7875	7.68756	OK
ENSG00000082146	-	-	ENSG00000082146	STRADB	-	2:202241929-202345569	-	-	8.78768	1.50041	16.075	OK	6.30969	0.0888584	12.5305	OK	9.01542	0.418753	17.6121	OK	11.5133	2.08617	20.9404	OK
ENSG00000082153	-	-	ENSG00000082153	BZW1	-	2:201542955-201688569	-	-	69.2371	42.0682	96.4061	OK	84.3781	12.7714	155.985	OK	88.1299	53.1544	123.105	OK	59.0341	36.7072	81.3609	OK
ENSG00000082175	-	-	ENSG00000082175	PGR	-	11:100900354-101001255	-	-	0	0	0	OK	0	0	0	OK	0	0	0	OK	0	0	0	OK
ENSG00000082196	-	-	ENSG00000082196	C1QTNF3	-	5:33986282-34124633	-	-	0.769651	0	2.47999	OK	0.518331	0	1.877	OK	0.790932	0	2.21955	OK	0.787929	0	2.17193	OK
ENSG00000082212	-	-	ENSG00000082212	ME2	-	18:48405418-48474691	-	-	22.6624	14.2793	31.0455	OK	19.7458	12.921	26.5706	OK	21.5752	13.6565	29.4938	OK	21.1942	13.1372	29.2512	OK
ENSG00000082213	-	-	ENSG00000082213	C5orf22	-	5:31532372-31555165	-	-	24.7251	15.1925	34.2578	OK	27.7274	15.4187	40.0361	OK	24.233	13.7472	34.7188	OK	22.9971	15.2553	30.7389	OK
ENSG00000082258	-	-	ENSG00000082258	CCNT2	-	2:135493033-135716912	-	-	9.67136	5.06198	14.2807	OK	12.0729	6.80365	17.3422	OK	11.7341	8.09444	15.3737	OK	10.7884	6.31009	15.2667	OK
ENSG00000082269	-	-	ENSG00000082269	FAM135A	-	6:71122530-71270877	-	-	6.1462	1.12485	11.1676	OK	7.8666	3.9528	11.7804	OK	7.131	2.85065	11.4114	OK	5.33313	1.52374	9.14252	OK
ENSG00000082293	-	-	ENSG00000082293	COL19A1	-	6:70576462-70919679	-	-	0	0	0	OK	0.0748408	0	1.94361	OK	0.0289868	0	1.89922	OK	0	0	0	OK
ENSG00000082397	-	-	ENSG00000082397	EPB41L3	-	18:5392382-5630699	-	-	28.6641	13.9182	43.41	OK	29.5623	15.0152	44.1094	OK	20.1631	8.90874	31.4174	OK	16.3095	6.5293	26.0897	OK
ENSG00000082438	-	-	ENSG00000082438	COBLL1	-	2:165510133-165705844	-	-	6.2141	0.445734	11.9825	OK	5.97979	1.41441	10.5452	OK	7.60592	2.05451	13.1573	OK	8.57488	1.54788	15.6019	OK
ENSG00000082458	-	-	ENSG00000082458	DLG3	-	X:69664710-69725337	-	-	1.32868	0	2.78132	OK	1.10731	0	2.40329	OK	1.09095	0	2.55199	OK	0.663481	0	1.74101	OK
ENSG00000082482	-	-	ENSG00000082482	KCNK2	-	1:215179117-215410436	-	-	0.119278	0	1.21554	OK	0.402688	0	1.6222	OK	0.189812	0	1.45891	OK	0.261277	0	1.38978	OK
ENSG00000082497	-	-	ENSG00000082497	SERTAD4	-	1:210404800-210419976	-	-	4.3865	0.413428	8.35957	OK	2.55231	0.37626	4.72837	OK	2.48543	0	7.38359	OK	2.78839	0	5.96366	OK
ENSG00000082512	-	-	ENSG00000082512	TRAF5	-	1:211499956-211548288	-	-	6.62005	4.23229	9.00781	OK	5.09586	3.2096	6.98212	OK	3.25461	1.63549	4.87374	OK	4.00681	2.31765	5.69596	OK
ENSG00000082515	-	-	ENSG00000082515	MRPL22	-	5:154320629-154348971	-	-	32.7086	22.8627	42.5546	OK	20.2167	12.5035	27.9299	OK	19.9488	12.4675	27.43	OK	17.271	10.2544	24.2876	OK
ENSG00000082516	-	-	ENSG00000082516	GEMIN5	-	5:154266975-154317769	-	-	3.78443	2.0521	5.51676	OK	2.3235	0.979475	3.66753	OK	2.67702	1.18879	4.16526	OK	2.00407	0.613873	3.39427	OK
ENSG00000082556	-	-	ENSG00000082556	OPRK1	-	8:54090130-54164257	-	-	0	0	0	OK	0.0318632	0	0.441606	OK	0	0	0	OK	0.0146232	0	0.427225	OK
ENSG00000082641	-	-	ENSG00000082641	NFE2L1	-	17:46125690-46138849	-	-	71.6508	44.9723	98.3292	OK	72.7217	45.8703	99.5731	OK	85.6223	52.4195	118.825	OK	85.4736	39.2986	131.649	OK
ENSG00000082684	-	-	ENSG00000082684	SEMA5B	-	3:122628040-122747452	-	-	0	0	0	OK	0	0	0	OK	0	0	0	OK	0.0166233	0	1.36902	OK
ENSG00000082701	-	-	ENSG00000082701	GSK3B	-	3:119540169-119813264	-	-	26.796	8.5362	45.0558	OK	26.3566	8.1583	44.555	OK	22.9362	6.33437	39.538	OK	18.4208	0	39.7703	OK
ENSG00000082781	-	-	ENSG00000082781	ITGB5	-	3:124480794-124620265	-	-	29.1116	18.2351	39.988	OK	24.973	16.58	33.366	OK	29.9115	19.2283	40.5947	OK	33.2231	18.3517	48.0945	OK
ENSG00000082805	-	-	ENSG00000082805	ERC1	-	12:1021242-1605099	-	-	11.7785	0	25.6273	OK	10.0309	0	21.3154	OK	6.50355	0.589808	12.4173	OK	7.82198	0	18.6065	OK
ENSG00000082898	-	-	ENSG00000082898	XPO1	-	2:61698322-61765761	-	-	47.4029	25.3717	69.4342	OK	38.1832	19.6839	56.6826	OK	39.1692	19.6798	58.6586	OK	35.9819	14.5586	57.4051	OK
ENSG00000082929	-	-	ENSG00000082929	C4orf6	-	4:5526295-5529528	-	-	0	0	0	OK	0	0	0	OK	0	0	0	OK	0	0	0	OK
ENSG00000082996	-	-	ENSG00000082996	RNF13	-	3:149478891-149942977	-	-	12.6867	4.0789	21.2946	OK	11.0405	5.20868	16.8723	OK	19.9135	8.50341	31.3235	OK	15.1357	7.72628	22.5451	OK
ENSG00000083067	-	-	ENSG00000083067	TRPM3	-	9:73143978-74061820	-	-	0.0307862	0	1.33425	OK	0.0118538	0	1.30619	OK	0.00731988	0	1.3025	OK	0.00469179	0	1.28783	OK
ENSG00000083093	-	-	ENSG00000083093	PALB2	-	16:23614487-23652631	-	-	4.31373	0	9.52309	OK	2.6938	0	6.4437	OK	3.43972	0	7.6318	OK	3.85819	0	7.87253	OK
ENSG00000083097	-	-	ENSG00000083097	DOPEY1	-	6:83777384-83908651	-	-	1.87329	0.119238	3.62735	OK	2.88686	0	8.42121	OK	2.84698	0	7.56505	OK	2.73827	0	7.60721	OK
ENSG00000083099	-	-	ENSG00000083099	LYRM2	-	6:90142888-90348472	-	-	9.96067	4.49711	15.4242	OK	7.23425	3.3151	11.1534	OK	9.04576	4.49153	13.6	OK	7.70667	3.75539	11.658	OK
ENSG00000083123	-	-	ENSG00000083123	BCKDHB	-	6:80816363-81055987	-	-	6.49946	0	13.0322	OK	11.8415	0	28.0869	OK	12.6377	0	27.574	OK	6.55421	0	13.1142	OK
ENSG00000083168	-	-	ENSG00000083168	KAT6A	-	8:41786996-41909508	-	-	6.06016	2.55376	9.56655	OK	7.20676	2.74586	11.6677	OK	7.06175	2.38548	11.738	OK	5.94173	1.89018	9.99328	OK
ENSG00000083223	-	-	ENSG00000083223	ZCCHC6	-	9:88902647-88969369	-	-	6.12501	2.07628	10.1737	OK	8.07882	5.3505	10.8071	OK	7.97567	4.76867	11.1827	OK	6.63855	3.71822	9.55888	OK
ENSG00000083290	-	-	ENSG00000083290	ULK2	-	17:19674141-19771249	-	-	4.03603	1.43216	6.63991	OK	6.08056	0.308557	11.8526	OK	5.44615	0.630649	10.2617	OK	4.77731	1.3072	8.24741	OK
ENSG00000083307	-	-	ENSG00000083307	GRHL2	-	8:102473404-102681954	-	-	0	0	0	OK	0	0	0	OK	0.239733	0	2.2349	OK	0	0	0	OK
ENSG00000083312	-	-	ENSG00000083312	TNPO1	-	5:72090231-72212560	-	-	52.032	27.9616	76.1023	OK	63.9656	32.0658	95.8654	OK	95.6529	48.6704	142.635	OK	62.4574	33.4403	91.4745	OK
ENSG00000083444	-	-	ENSG00000083444	PLOD1	-	1:11994261-12035595	-	-	46.2588	20.893	71.6247	OK	43.6848	20.9795	66.39	OK	59.2144	28.3646	90.0642	OK	63.1392	30.1947	96.0837	OK
ENSG00000083454	-	-	ENSG00000083454	P2RX5	-	17:3566195-3599698	-	-	0	0	0	OK	0.0157105	0	1.27071	OK	0.0955311	0	1.44361	OK	0.0524893	0	1.26797	OK
ENSG00000083457	-	-	ENSG00000083457	ITGAE	-	17:3617921-3704537	-	-	14.6435	4.86436	24.4227	OK	11.448	5.31552	17.5805	OK	13.4305	6.84856	20.0125	OK	16.4595	9.55056	23.3683	OK
ENSG00000083520	-	-	ENSG00000083520	DIS3	-	13:73302060-73590591	-	-	8.87859	5.77932	11.9779	OK	9.97697	6.78581	13.1681	OK	11.4003	7.61098	15.1896	OK	10.1076	4.68208	15.5332	OK
ENSG00000083535	-	-	ENSG00000083535	PIBF1	-	13:73302060-73590591	-	-	9.11416	0	18.6105	OK	7.90209	0	16.9324	OK	10.7515	0	25.1577	OK	9.45721	0	19.1942	OK
ENSG00000083544	-	-	ENSG00000083544	TDRD3	-	13:60970590-61148012	-	-	4.66855	1.63818	7.69893	OK	4.8159	1.76826	7.86354	OK	4.10383	1.24964	6.95802	OK	3.28623	1.30781	5.26464	OK
ENSG00000083622	-	-	ENSG00000083622	AC000111.6	-	7:117105837-117514193	-	-	0	0	0	OK	0	0	0	OK	0	0	0	OK	0	0	0	OK
ENSG00000083635	-	-	ENSG00000083635	NUFIP1	-	13:45513383-45657260	-	-	1.80011	0.85999	2.74024	OK	1.37134	0.595501	2.14717	OK	1.52131	0.651148	2.39148	OK	1.16852	0.25139	2.08566	OK
ENSG00000083642	-	-	ENSG00000083642	PDS5B	-	13:33160563-33352157	-	-	9.50368	4.96789	14.0395	OK	10.0948	5.88494	14.3046	OK	8.80203	4.83568	12.7684	OK	9.863	5.57137	14.1546	OK
ENSG00000083720	-	-	ENSG00000083720	OXCT1	-	5:41730166-41871059	-	-	18.6689	2.92206	34.4157	OK	21.009	6.30004	35.7179	OK	17.6924	2.2426	33.1422	OK	14.5621	6.40576	22.7184	OK
ENSG00000083750	-	-	ENSG00000083750	RRAGB	-	X:55744171-55785207	-	-	12.7014	6.10591	19.2969	OK	9.57267	4.50522	14.6401	OK	7.71719	3.1404	12.294	OK	7.15274	2.48775	11.8177	OK
ENSG00000083782	-	-	ENSG00000083782	EPYC	-	12:91357455-91398803	-	-	0.282652	0	1.07875	OK	0.0863934	0	0.834018	OK	0	0	0	OK	0.145176	0	0.91376	OK
ENSG00000083799	-	-	ENSG00000083799	CYLD	-	16:50774820-50837249	-	-	5.38737	1.67948	9.09526	OK	9.32318	0	19.2064	OK	11.8621	2.56856	21.1556	OK	6.97548	1.64442	12.3065	OK
ENSG00000083807	-	-	ENSG00000083807	SLC27A5	-	19:58985383-59023780	-	-	1.76348	0	4.0155	OK	0.947226	0	2.79237	OK	1.49778	0	3.57979	OK	2.00272	0	4.42684	OK
ENSG00000083812	-	-	ENSG00000083812	ZNF324	-	19:58978422-58984945	-	-	0.793174	0.225231	1.36112	OK	1.62968	0.815302	2.44406	OK	1.45947	0.63152	2.28742	OK	1.25198	0.505	1.99895	OK
ENSG00000083814	-	-	ENSG00000083814	ZNF671	-	19:58193336-58269527	-	-	1.77833	0	4.89469	OK	1.20924	0	4.7185	OK	1.11939	0	3.25139	OK	1.58128	0	5.77617	OK
ENSG00000083817	-	-	ENSG00000083817	ZNF416	-	19:58082933-58105145	-	-	1.03668	0.403707	1.66964	OK	0.785575	0.281995	1.28916	OK	0.969946	0.397089	1.5428	OK	1.17473	0.534034	1.81542	OK
ENSG00000083828	-	-	ENSG00000083828	ZNF586	-	19:58281022-58427978	-	-	4.34025	0.652643	8.02786	OK	3.15169	0	7.23431	OK	3.00377	0	7.74794	OK	2.34804	0	5.30087	OK
ENSG00000083838	-	-	ENSG00000083838	ZNF446	-	19:58985383-59023780	-	-	1.13323	0	2.9564	OK	0.98731	0	2.45244	OK	0.836612	0	2.47963	OK	0.622944	0	1.84703	OK
ENSG00000083842	-	-	ENSG00000083842	ZNF8	-	19:58739959-58827023	-	-	0.77947	0	2.02274	OK	0.562451	0	1.39415	OK	0.538566	0	1.47714	OK	0.672183	0	1.62697	OK
ENSG00000083844	-	-	ENSG00000083844	ZNF264	-	19:57702867-57724724	-	-	1.22062	0	3.27788	OK	2.14021	0	4.50847	OK	0.927741	0	2.8617	OK	0.942001	0	4.25324	OK
ENSG00000083845	-	-	ENSG00000083845	RPS5	-	19:58897766-58906173	-	-	212.599	160.528	264.67	OK	170.44	128.595	212.284	OK	211.954	159.094	264.815	OK	252.629	192.326	312.932	OK
ENSG00000083857	-	-	ENSG00000083857	FAT1	-	4:187508936-187647876	-	-	2.27166	0	6.51609	OK	8.16416	0.856393	15.4719	OK	2.12166	0	5.79434	OK	1.53331	0	4.88981	OK
ENSG00000083896	-	-	ENSG00000083896	YTHDC1	-	4:69176104-69215807	-	-	23.4848	0	47.0203	OK	29.3973	4.35434	54.4403	OK	25.6395	5.5013	45.7777	OK	22.0718	1.35705	42.7866	OK
ENSG00000083937	-	-	ENSG00000083937	CHMP2B	-	3:87276420-87304698	-	-	12.0541	8.43693	15.6713	OK	13.356	9.6117	17.1002	OK	14.8413	10.8618	18.8208	OK	12.8735	9.28409	16.4628	OK
ENSG00000084070	-	-	ENSG00000084070	SMAP2	-	1:40810521-40888998	-	-	2.84029	1.1296	4.55097	OK	3.38491	1.61606	5.15376	OK	5.68301	2.76259	8.60343	OK	3.04565	0.897319	5.19398	OK
ENSG00000084072	-	-	ENSG00000084072	PPIE	-	1:40157853-40254533	-	-	19.2805	13.6133	24.9477	OK	17.9385	12.1575	23.7195	OK	17.7801	12.0886	23.4715	OK	18.5636	12.9293	24.1979	OK
ENSG00000084073	-	-	ENSG00000084073	ZMPSTE24	-	1:40723778-40759856	-	-	26.3539	18.8287	33.8791	OK	27.3787	20.3842	34.3731	OK	31.6848	23.4182	39.9514	OK	27.0294	19.7702	34.2885	OK
ENSG00000084090	-	-	ENSG00000084090	STARD7	-	2:96850596-96908359	-	-	42.5438	30.6658	54.4219	OK	40.8699	29.6573	52.0825	OK	54.0973	40.5918	67.6027	OK	43.3693	30.5781	56.1605	OK
ENSG00000084092	-	-	ENSG00000084092	NOA1	-	4:57829535-58071676	-	-	7.99895	0	19.3815	OK	6.23771	0	17.5385	OK	7.83324	0	20.3238	OK	7.02915	0	21.1604	OK
ENSG00000084093	-	-	ENSG00000084093	REST	-	4:57774074-57802010	-	-	6.6005	4.36834	8.83265	OK	6.89529	4.61229	9.17828	OK	8.4757	5.91184	11.0396	OK	7.84063	3.10453	12.5767	OK
ENSG00000084110	-	-	ENSG00000084110	HAL	-	12:96366439-96390143	-	-	0.158385	0	1.89696	OK	0	0	0	OK	0.0084949	0	1.98119	OK	0.0220593	0	1.75434	OK
ENSG00000084112	-	-	ENSG00000084112	SSH1	-	12:109176465-109251366	-	-	6.24299	3.90243	8.58356	OK	22.8575	14.5248	31.1902	OK	17.27	12.4383	22.1018	OK	12.113	7.72964	16.4963	OK
ENSG00000084207	-	-	ENSG00000084207	GSTP1	-	11:67351065-67354131	-	-	220.296	167.531	273.062	OK	177.157	134.155	220.159	OK	222.851	167.345	278.356	OK	248.175	188.979	307.371	OK
ENSG00000084234	-	-	ENSG00000084234	APLP2	-	11:129936835-130014699	-	-	348.053	168.968	527.138	OK	335.737	153.58	517.895	OK	342.919	166.851	518.988	OK	340.798	167.486	514.11	OK
ENSG00000084444	-	-	ENSG00000084444	KIAA1467	-	12:13197217-13295455	-	-	2.1983	0.970482	3.42611	OK	2.14854	0.794525	3.50256	OK	1.98024	0.604685	3.35579	OK	2.93791	1.071	4.80481	OK
ENSG00000084453	-	-	ENSG00000084453	SLCO1A2	-	12:21417533-21572528	-	-	0.0689973	0	2.82167	OK	0.127991	0	2.26499	OK	0.0167506	0	2.75287	OK	0.0304451	0	2.16062	OK
ENSG00000084463	-	-	ENSG00000084463	WBP11	-	12:14939409-14956474	-	-	13.8267	8.72759	18.9258	OK	12.8933	9.16067	16.6259	OK	13.3082	9.64755	16.969	OK	11.5638	8.36333	14.7642	OK
ENSG00000084623	-	-	ENSG00000084623	EIF3I	-	1:32674694-32697205	-	-	88.7602	66.019	111.502	OK	98.6826	71.8603	125.505	OK	104.119	77.7786	130.46	OK	106.716	78.5548	134.877	OK
ENSG00000084628	-	-	ENSG00000084628	NKAIN1	-	1:31652591-31712401	-	-	0	0	0	OK	0.453457	0	1.86166	OK	0	0	0	OK	0.138211	0	1.50376	OK
ENSG00000084636	-	-	ENSG00000084636	COL16A1	-	1:32083286-32169920	-	-	0.0919907	0	2.21845	OK	0.257902	0	2.46063	OK	0.129644	0	2.27897	OK	0.103776	0	2.25572	OK
ENSG00000084652	-	-	ENSG00000084652	TXLNA	-	1:32645286-32663886	-	-	10.1946	7.67487	12.7144	OK	7.40657	5.52542	9.28772	OK	12.2466	9.30548	15.1878	OK	9.76613	7.35763	12.1746	OK
ENSG00000084674	-	-	ENSG00000084674	APOB	-	2:21224300-21266945	-	-	0.0171929	0	0.129078	OK	0.0491693	0	0.154968	OK	0.0967697	0	0.269657	OK	0.0284174	0	0.128746	OK
ENSG00000084676	-	-	ENSG00000084676	NCOA1	-	2:24714782-24993571	-	-	7.12352	0.154939	14.0921	OK	4.35725	0.772782	7.94173	OK	3.93797	0.515046	7.36089	OK	3.88375	0.131899	7.6356	OK
ENSG00000084693	-	-	ENSG00000084693	AGBL5	-	2:27265231-27294641	-	-	8.83	2.61979	15.0402	OK	5.36974	1.47961	9.25987	OK	8.99583	2.24493	15.7467	OK	7.36043	1.06751	13.6533	OK
ENSG00000084710	-	-	ENSG00000084710	EFR3B	-	2:25264998-25378243	-	-	0.147606	0	0.444017	OK	0.238611	0	0.533253	OK	0.785436	0.281966	1.2889	OK	0.585584	0.145968	1.0252	OK
ENSG00000084731	-	-	ENSG00000084731	KIF3C	-	2:26149470-26205618	-	-	4.70227	2.32127	7.08326	OK	4.76544	2.6739	6.85698	OK	4.42785	1.12331	7.73239	OK	4.65562	1.66411	7.64713	OK
ENSG00000084733	-	-	ENSG00000084733	RAB10	-	2:26256975-26360323	-	-	81.5774	57.3322	105.823	OK	100.719	70.3631	131.075	OK	101.397	71.9697	130.825	OK	85.0613	61.3526	108.77	OK
ENSG00000084734	-	-	ENSG00000084734	GCKR	-	2:27719708-27746554	-	-	0	0	0	OK	0.0212015	0	1.24333	OK	0.0520497	0	1.20123	OK	0.0475468	0	1.30027	OK
ENSG00000084754	-	-	ENSG00000084754	HADHA	-	2:26413503-26513336	-	-	55.9556	40.5841	71.3272	OK	50.6087	36.2995	64.918	OK	56.8804	37.72	76.0409	OK	61.8703	39.445	84.2957	OK
ENSG00000084764	-	-	ENSG00000084764	MAPRE3	-	2:27070614-27250064	-	-	3.27048	1.13663	5.40432	OK	2.4228	0.560552	4.28505	OK	3.45007	1.12369	5.77646	OK	1.95588	0.0233767	3.88839	OK
ENSG00000084774	-	-	ENSG00000084774	CAD	-	2:27440257-27466811	-	-	11.406	4.05993	18.7521	OK	10.0648	2.47025	17.6593	OK	7.21407	0	15.8876	OK	9.30775	1.83527	16.7802	OK
ENSG00000085063	-	-	ENSG00000085063	CD59	-	11:33719806-33757991	-	-	263.801	203.139	324.464	OK	253.294	193.839	312.749	OK	250.534	192.017	309.052	OK	278.204	213.231	343.177	OK
ENSG00000085117	-	-	ENSG00000085117	CD82	-	11:44585976-44641913	-	-	7.46203	0.704825	14.2192	OK	5.28945	0	11.222	OK	10.5525	1.7517	19.3533	OK	5.19161	0.531975	9.85125	OK
ENSG00000085185	-	-	ENSG00000085185	BCORL1	-	X:129115082-129192058	-	-	2.383	0.151392	4.61461	OK	2.88215	0.784909	4.9794	OK	4.06212	0.255322	7.86893	OK	3.59137	0.59541	6.58733	OK
ENSG00000085224	-	-	ENSG00000085224	ATRX	-	X:76760355-77041702	-	-	15.5474	2.32998	28.7649	OK	20.655	0	47.1425	OK	16.1909	0	35.5162	OK	17.0429	0	35.598	OK
ENSG00000085231	-	-	ENSG00000085231	TAF9	-	5:68646810-68710628	-	-	59.018	40.5753	77.4608	OK	65.0873	44.9327	85.242	OK	65.0617	44.1405	85.9829	OK	54.9089	36.9609	72.8569	OK
ENSG00000085265	-	-	ENSG00000085265	FCN1	-	9:137801430-137809809	-	-	0	0	0	OK	0	0	0	OK	0	0	0	OK	0	0	0	OK
ENSG00000085274	-	-	ENSG00000085274	MYNN	-	3:169490618-169507504	-	-	2.94643	0.778831	5.11403	OK	5.45993	2.79829	8.12157	OK	3.66762	1.65203	5.68321	OK	3.12387	1.3578	4.88995	OK
ENSG00000085276	-	-	ENSG00000085276	MECOM	-	3:168801286-169381406	-	-	20.4404	10.52	30.3609	OK	22.3897	12.3965	32.3829	OK	13.9564	7.38976	20.5231	OK	23.5569	14.7469	32.3669	OK
ENSG00000085365	-	-	ENSG00000085365	SCAMP1	-	5:77656338-77776562	-	-	12.7033	8.26587	17.1407	OK	14.2278	8.81682	19.6389	OK	11.5033	7.75087	15.2557	OK	10.9007	6.91888	14.8826	OK
ENSG00000085377	-	-	ENSG00000085377	PREP	-	6:105725439-105850959	-	-	13.3145	9.61205	17.0169	OK	10.8822	7.67442	14.09	OK	13.9841	10.0089	17.9592	OK	16.1751	11.7213	20.629	OK
ENSG00000085382	-	-	ENSG00000085382	HACE1	-	6:105175967-105307794	-	-	6.17105	2.28311	10.059	OK	4.69987	2.07763	7.32211	OK	5.7694	2.64202	8.89679	OK	4.35469	1.96215	6.74722	OK
ENSG00000085415	-	-	ENSG00000085415	SEH1L	-	18:12947131-12991172	-	-	12.0892	8.33268	15.8457	OK	16.5712	10.8316	22.3108	OK	17.3131	11.8636	22.7627	OK	11.775	7.76023	15.7898	OK
ENSG00000085433	-	-	ENSG00000085433	WDR47	-	1:109512835-109584850	-	-	6.77463	3.57373	9.97554	OK	7.21234	3.95537	10.4693	OK	7.04059	3.82639	10.2548	OK	7.03962	3.91165	10.1676	OK
ENSG00000085449	-	-	ENSG00000085449	WDFY1	-	2:224720432-224810104	-	-	23.4439	13.5599	33.3278	OK	24.4619	13.4407	35.4832	OK	35.3215	22.2289	48.4141	OK	22.6501	10.094	35.2062	OK
ENSG00000085465	-	-	ENSG00000085465	OVGP1	-	1:111956935-111970399	-	-	0.793466	0	2.84721	OK	0.230689	0	1.35676	OK	0.621339	0	1.91113	OK	0.538655	0	1.72049	OK
ENSG00000085491	-	-	ENSG00000085491	SLC25A24	-	1:108676657-108744113	-	-	15.2929	11.3126	19.2732	OK	14.2459	10.4689	18.0229	OK	16.5981	12.1622	21.0341	OK	12.3295	9.01437	15.6446	OK
ENSG00000085511	-	-	ENSG00000085511	MAP3K4	-	6:161411349-161538417	-	-	6.10247	0.778443	11.4265	OK	7.12932	0	17.449	OK	6.24618	0	14.5487	OK	6.04559	0	13.3397	OK
ENSG00000085514	-	-	ENSG00000085514	PILRA	-	7:99905324-99997719	-	-	0.321113	0	1.6762	OK	0.183138	0	1.42304	OK	0.137497	0	1.26146	OK	0.0899702	0	1.18369	OK
ENSG00000085552	-	-	ENSG00000085552	IGSF9	-	1:159896828-159915386	-	-	0	0	0	OK	0.095406	0	0.379835	OK	0.0132727	0	0.255847	OK	0.0144352	0	0.264607	OK
ENSG00000085563	-	-	ENSG00000085563	ABCB1	-	7:87133174-87461611	-	-	1.61911	0	3.70965	OK	2.20025	0	5.05184	OK	2.4287	0	5.35564	OK	3.335	0	6.89212	OK
ENSG00000085644	-	-	ENSG00000085644	ZNF213	-	16:3160460-3192806	-	-	5.83047	2.41361	9.24733	OK	4.75727	2.06651	7.44803	OK	5.60404	2.67245	8.53562	OK	6.40692	3.39625	9.41759	OK
ENSG00000085662	-	-	ENSG00000085662	AKR1B1	-	7:134127101-134144036	-	-	39.8819	26.5195	53.2444	OK	24.6195	15.9552	33.2838	OK	31.0697	20.6871	41.4524	OK	34.1876	22.7037	45.6715	OK
ENSG00000085719	-	-	ENSG00000085719	CPNE3	-	8:87345502-87777251	-	-	31.9767	13.9263	50.0272	OK	15.2575	4.82492	25.6901	OK	24.2651	6.58777	41.9424	OK	17.7292	5.34766	30.1108	OK
ENSG00000085721	-	-	ENSG00000085721	RRN3	-	16:15068447-15248421	-	-	7.24025	3.21718	11.2633	OK	8.2898	2.63432	13.9453	OK	10.2486	4.19558	16.3015	OK	7.83154	2.97255	12.6905	OK
ENSG00000085733	-	-	ENSG00000085733	CTTN	-	11:70116805-70282690	-	-	111.68	71.1329	152.228	OK	107.507	71.7637	143.251	OK	117.857	78.2153	157.499	OK	122.923	77.2468	168.6	OK
ENSG00000085741	-	-	ENSG00000085741	WNT11	-	11:75897368-75921780	-	-	0	0	0	OK	0	0	0	OK	0.111526	0	1.25239	OK	0.0467844	0	1.16726	OK
ENSG00000085760	-	-	ENSG00000085760	MTIF2	-	2:55463730-55496483	-	-	10.3831	5.13392	15.6323	OK	9.23851	4.4897	13.9873	OK	12.0653	6.25397	17.8767	OK	8.5683	4.55199	12.5846	OK
ENSG00000085788	-	-	ENSG00000085788	DDHD2	-	8:38082735-38239790	-	-	21.3778	4.02125	38.7343	OK	16.5189	2.33003	30.7078	OK	16.3395	3.46451	29.2144	OK	13.841	1.43983	26.2422	OK
ENSG00000085831	-	-	ENSG00000085831	TTC39A	-	1:51752929-51810788	-	-	0.633562	0	2.74678	OK	0.372582	0	2.38346	OK	0.273645	0	2.7068	OK	0.126867	0	2.02014	OK
ENSG00000085832	-	-	ENSG00000085832	EPS15	-	1:51819934-52027301	-	-	14.0121	9.74394	18.2803	OK	14.3683	9.43738	19.2991	OK	16.3201	5.19585	27.4443	OK	12.7333	8.74202	16.7247	OK
ENSG00000085840	-	-	ENSG00000085840	ORC1	-	1:52838500-52870131	-	-	1.0042	0.48855	1.51986	OK	1.03821	0.528623	1.5478	OK	1.16708	0.601463	1.7327	OK	0.595384	0.215924	0.974843	OK
ENSG00000085871	-	-	ENSG00000085871	MGST2	-	4:140586921-141075338	-	-	35.7461	17.8736	53.6186	OK	34.1371	16.9118	51.3623	OK	35.7068	19.0441	52.3695	OK	70.4537	41.3347	99.5728	OK
ENSG00000085872	-	-	ENSG00000085872	CHERP	-	19:16589867-16771253	-	-	13.3212	3.06158	23.5808	OK	9.94522	3.51934	16.3711	OK	11.74	2.16399	21.3159	OK	12.7036	0.945179	24.4621	OK
ENSG00000085978	-	-	ENSG00000085978	ATG16L1	-	2:234118696-234204320	-	-	4.61716	1.73894	7.49539	OK	4.61282	1.98887	7.23677	OK	7.16901	4.3006	10.0374	OK	5.9911	3.05874	8.92347	OK
ENSG00000085982	-	-	ENSG00000085982	USP40	-	2:234384165-234475428	-	-	16.0505	4.73114	27.3698	OK	11.7861	3.90153	19.6706	OK	10.9566	2.3889	19.5243	OK	11.4573	2.76284	20.1517	OK
ENSG00000085998	-	-	ENSG00000085998	POMGNT1	-	1:46654353-46686933	-	-	9.91976	4.18548	15.654	OK	6.36128	3.31088	9.41167	OK	9.33301	5.42218	13.2438	OK	9.45491	4.36419	14.5456	OK
ENSG00000085999	-	-	ENSG00000085999	RAD54L	-	1:46713359-46769280	-	-	1.94498	0	4.79492	OK	0.799703	0	2.8349	OK	2.6189	0	5.92188	OK	1.39827	0	4.10199	OK
ENSG00000086015	-	-	ENSG00000086015	MAST2	-	1:46252658-46501796	-	-	6.4541	1.46064	11.4476	OK	7.77553	1.68705	13.864	OK	7.12449	1.39719	12.8518	OK	4.4453	1.4383	7.45229	OK
ENSG00000086061	-	-	ENSG00000086061	DNAJA1	-	9:33025208-33039905	-	-	83.4293	62.487	104.372	OK	104.782	79.4753	130.088	OK	92.0721	66.5351	117.609	OK	94.1853	69.0878	119.283	OK
ENSG00000086062	-	-	ENSG00000086062	B4GALT1	-	9:33104079-33179981	-	-	23.9282	16.805	31.0514	OK	29.52	21.4515	37.5885	OK	51.22	39.0986	63.3414	OK	30.6097	22.5161	38.7034	OK
ENSG00000086065	-	-	ENSG00000086065	CHMP5	-	9:33264939-33281977	-	-	11.939	8.05486	15.8232	OK	13.4737	9.07748	17.8699	OK	14.9486	10.4544	19.4428	OK	15.3733	9.94883	20.7978	OK
ENSG00000086102	-	-	ENSG00000086102	NFX1	-	9:33290508-33371155	-	-	6.95242	4.19226	9.71257	OK	7.36976	3.18535	11.5542	OK	8.54622	5.6471	11.4453	OK	9.68205	5.42143	13.9427	OK
ENSG00000086159	-	-	ENSG00000086159	AQP6	-	12:50360976-50426919	-	-	0	0	0	OK	0.00928039	0	0.480827	OK	0.00626229	0	0.477013	OK	0.0216502	0	0.496991	OK
ENSG00000086189	-	-	ENSG00000086189	DIMT1	-	5:61601988-61924409	-	-	23.9271	11.0853	36.769	OK	27.4358	13.0137	41.8578	OK	21.0045	9.75298	32.256	OK	22.0295	10.2303	33.8287	OK
ENSG00000086200	-	-	ENSG00000086200	IPO11	-	5:61601988-61924409	-	-	39.1733	23.0467	55.2999	OK	44.6486	23.2841	66.013	OK	37.0629	22.2035	51.9223	OK	44.0933	27.4551	60.7314	OK
ENSG00000086205	-	-	ENSG00000086205	FOLH1	-	11:49168186-49230222	-	-	0.058025	0	2.1483	OK	0.189666	0	1.86886	OK	0.0407366	0	2.10053	OK	0.312542	0	2.11454	OK
ENSG00000086232	-	-	ENSG00000086232	EIF2AK1	-	7:6048875-6098861	-	-	35.7108	25.6431	45.7786	OK	37.1891	25.84	48.5382	OK	38.0712	24.755	51.3873	OK	41.1969	28.3043	54.0896	OK
ENSG00000086288	-	-	ENSG00000086288	NME8	-	7:37723398-38065297	-	-	0	0	0	OK	0	0	0	OK	0	0	0	OK	0	0	0	OK
ENSG00000086289	-	-	ENSG00000086289	EPDR1	-	7:37723398-38065297	-	-	0.707205	0	2.06656	OK	0	0	0	OK	0	0	0	OK	0.133944	0	1.06349	OK
ENSG00000086300	-	-	ENSG00000086300	SNX10	-	7:26331540-26416321	-	-	0.957422	0	2.5925	OK	0.421461	0	1.70784	OK	0.493526	0	1.97859	OK	0.621607	0	1.9427	OK
ENSG00000086475	-	-	ENSG00000086475	SEPHS1	-	10:13359423-13390297	-	-	23.1744	13.1429	33.2059	OK	27.5378	17.3208	37.7548	OK	26.3451	12.3083	40.3819	OK	25.6941	16.2376	35.1506	OK
ENSG00000086504	-	-	ENSG00000086504	MRPL28	-	16:417383-420527	-	-	16.1117	9.65284	22.5705	OK	12.4377	8.03643	16.8389	OK	12.4941	7.786	17.2022	OK	14.9341	9.70301	20.1651	OK
ENSG00000086506	-	-	ENSG00000086506	HBQ1	-	16:230451-231180	-	-	0	0	0	OK	0	0	0	OK	0	0	0	OK	0	0	0	OK
ENSG00000086544	-	-	ENSG00000086544	ITPKC	-	19:41197433-41271294	-	-	1.8905	0.263625	3.51738	OK	2.08119	0.212943	3.94944	OK	1.84198	0	4.04223	OK	2.33401	0.381157	4.28685	OK
ENSG00000086548	-	-	ENSG00000086548	CEACAM6	-	19:42212503-42290801	-	-	0	0	0	OK	0	0	0	OK	0	0	0	OK	0	0	0	OK
ENSG00000086570	-	-	ENSG00000086570	FAT2	-	5:150883653-150948505	-	-	0.0735717	0	0.196762	OK	0	0	0	OK	0	0	0	OK	0.0229387	0	0.0979496	OK
ENSG00000086589	-	-	ENSG00000086589	RBM22	-	5:150070355-150080669	-	-	15.6602	11.2094	20.111	OK	14.5872	9.88108	19.2934	OK	14.6301	9.7396	19.5206	OK	14.3549	10.0977	18.6122	OK
ENSG00000086598	-	-	ENSG00000086598	TMED2	-	12:124066766-124083116	-	-	132.56	102.419	162.702	OK	166.842	128.978	204.706	OK	236.667	182.399	290.934	OK	196.648	151.89	241.406	OK
ENSG00000086619	-	-	ENSG00000086619	ERO1LB	-	1:236305831-236445319	-	-	2.01997	0.721889	3.31806	OK	1.72563	0	3.54685	OK	11.4245	7.88524	14.9637	OK	3.23417	1.51199	4.95636	OK
ENSG00000086666	-	-	ENSG00000086666	ZFAND6	-	15:80351909-80430735	-	-	42.3117	30.945	53.6784	OK	47.0067	34.3526	59.6608	OK	47.8429	33.9098	61.7761	OK	46.8627	34.0212	59.7043	OK
ENSG00000086696	-	-	ENSG00000086696	HSD17B2	-	16:82068608-82173236	-	-	0.70234	0	2.12386	OK	1.15741	0	2.82967	OK	1.92539	0	3.93777	OK	7.33601	3.8646	10.8074	OK
ENSG00000086712	-	-	ENSG00000086712	TXLNG	-	X:16804549-16888537	-	-	4.39053	1.86068	6.92039	OK	4.25664	1.99089	6.52239	OK	5.36876	2.35904	8.37847	OK	3.40381	1.48033	5.3273	OK
ENSG00000086717	-	-	ENSG00000086717	PPEF1	-	X:18694028-18846039	-	-	0	0	0	OK	0.0217804	0	1.70718	OK	0	0	0	OK	0.206337	0	1.65645	OK
ENSG00000086730	-	-	ENSG00000086730	LAT2	-	7:73613981-73644161	-	-	0.409555	0	1.94619	OK	0.398184	0	1.88353	OK	0.499633	0	2.02272	OK	0.436828	0	2.09536	OK
ENSG00000086758	-	-	ENSG00000086758	HUWE1	-	X:53559056-53713673	-	-	36.8783	21.5507	52.2058	OK	33.6681	17.7058	49.6304	OK	33.57	18.8663	48.2737	OK	33.0103	15.2529	50.7676	OK
ENSG00000086827	-	-	ENSG00000086827	ZW10	-	11:113603908-113644533	-	-	6.44463	4.53087	8.35839	OK	7.384	5.25457	9.51343	OK	8.80512	6.34589	11.2644	OK	6.53479	4.51329	8.55628	OK
ENSG00000086848	-	-	ENSG00000086848	ALG9	-	11:111652918-111756699	-	-	17.0238	8.71446	25.333	OK	16.9546	8.01422	25.8951	OK	17.0192	8.7917	25.2467	OK	20.5838	11.0716	30.0961	OK
ENSG00000086967	-	-	ENSG00000086967	MYBPC2	-	19:50936159-50969578	-	-	0	0	0	OK	0	0	0	OK	0	0	0	OK	0	0	0	OK
ENSG00000086991	-	-	ENSG00000086991	NOX4	-	11:89057523-89322779	-	-	11.3782	7.6771	15.0793	OK	15.0454	10.0859	20.005	OK	14.9304	9.96974	19.891	OK	17.2423	9.67395	24.8106	OK
ENSG00000087008	-	-	ENSG00000087008	ACOX3	-	4:8368008-8514337	-	-	7.85225	1.00908	14.6954	OK	6.04214	0.818013	11.2663	OK	5.76812	2.17099	9.36525	OK	6.37429	1.69973	11.0489	OK
ENSG00000087053	-	-	ENSG00000087053	MTMR2	-	11:95566045-95658479	-	-	19.7706	13.5849	25.9564	OK	19.9735	12.7963	27.1508	OK	20.5364	13.1553	27.9175	OK	16.3462	10.662	22.0304	OK
ENSG00000087074	-	-	ENSG00000087074	PPP1R15A	-	19:49375648-49379314	-	-	14.5245	10.7214	18.3276	OK	30.8076	23.2752	38.34	OK	15.3739	11.5181	19.2298	OK	12.7137	9.41617	16.0113	OK
ENSG00000087076	-	-	ENSG00000087076	HSD17B14	-	19:49316273-49339935	-	-	9.4832	4.36599	14.6004	OK	9.11365	4.05998	14.1673	OK	10.2658	3.20046	17.3312	OK	10.16	3.67606	16.644	OK
ENSG00000087077	-	-	ENSG00000087077	TRIP6	-	7:100464759-100471076	-	-	10.0663	6.17236	13.9602	OK	15.0433	9.2512	20.8354	OK	15.4394	9.63801	21.2407	OK	13.8266	8.98532	18.6679	OK
ENSG00000087085	-	-	ENSG00000087085	ACHE	-	7:100487614-100494594	-	-	0	0	0	OK	0.153287	0	2.92307	OK	0.37182	0	2.97868	OK	0.318007	0	2.99396	OK
ENSG00000087086	-	-	ENSG00000087086	FTL	-	19:49468557-49470135	-	-	610.88	472.454	749.305	OK	490.83	379.507	602.153	OK	574.584	444.309	704.859	OK	616.542	476.037	757.048	OK
ENSG00000087087	-	-	ENSG00000087087	SRRT	-	7:100472732-100486285	-	-	36.6493	13.5815	59.7171	OK	23.5031	9.42514	37.581	OK	26.8411	12.7814	40.9007	OK	24.7905	10.2112	39.3698	OK
ENSG00000087088	-	-	ENSG00000087088	BAX	-	19:49458071-49465055	-	-	55.1237	37.7085	72.5389	OK	43.7746	28.0251	59.5241	OK	41.1154	27.4315	54.7993	OK	47.721	32.7963	62.6457	OK
ENSG00000087095	-	-	ENSG00000087095	NLK	-	17:26368762-26523407	-	-	14.4778	10.1738	18.7818	OK	19.5702	13.841	25.2994	OK	25.9853	18.5269	33.4436	OK	22.1661	13.5717	30.7605	OK
ENSG00000087111	-	-	ENSG00000087111	PIGS	-	17:26782769-26972472	-	-	20.144	3.0587	37.2293	OK	13.8092	0.886146	26.7322	OK	17.3085	1.25874	33.3582	OK	18.3953	3.2926	33.4979	OK
ENSG00000087116	-	-	ENSG00000087116	ADAMTS2	-	5:178537851-178772431	-	-	0	0	0	OK	0.088304	0	1.56849	OK	0	0	0	OK	0.0298995	0	1.50831	OK
ENSG00000087128	-	-	ENSG00000087128	TMPRSS11E	-	4:69313166-69363322	-	-	0	0	0	OK	0	0	0	OK	0	0	0	OK	0	0	0	OK
ENSG00000087152	-	-	ENSG00000087152	ATXN7L3	-	17:42269172-42301078	-	-	12.1597	1.53981	22.7796	OK	15.7022	0	33.6973	OK	19.5391	1.61131	37.4669	OK	17.5839	0	37.4213	OK
ENSG00000087157	-	-	ENSG00000087157	PGS1	-	17:76374720-76573476	-	-	5.71483	2.0584	9.37126	OK	5.11327	1.24213	8.98441	OK	6.76215	2.77764	10.7467	OK	7.70917	3.43502	11.9833	OK
ENSG00000087191	-	-	ENSG00000087191	PSMC5	-	17:61896792-61909379	-	-	54.2179	35.8161	72.6196	OK	54.1216	35.0483	73.1948	OK	62.4131	40.1765	84.6497	OK	60.253	40.1387	80.3673	OK
ENSG00000087206	-	-	ENSG00000087206	UIMC1	-	5:176332005-176449634	-	-	18.9545	5.95451	31.9545	OK	23.1728	0	47.7173	OK	11.2595	0	22.6036	OK	13.6802	0	29.7897	OK
ENSG00000087237	-	-	ENSG00000087237	CETP	-	16:56995761-57017757	-	-	0.633339	0	1.46427	OK	0.855706	0	1.90028	OK	0.938887	0	1.93732	OK	1.28536	0.236941	2.33378	OK
ENSG00000087245	-	-	ENSG00000087245	MMP2	-	16:55423611-55540603	-	-	228.931	149.027	308.835	OK	194.454	125.975	262.933	OK	222.471	135.641	309.301	OK	244.452	157.777	331.126	OK
ENSG00000087250	-	-	ENSG00000087250	MT3	-	16:56622985-56625000	-	-	0	0	0	OK	0	0	0	OK	0	0	0	OK	0.297389	0	2.24523	OK
ENSG00000087253	-	-	ENSG00000087253	LPCAT2	-	16:55542909-55620582	-	-	37.9921	22.8611	53.1231	OK	33.7208	19.6234	47.8181	OK	22.6665	14.7184	30.6147	OK	19.7403	11.9037	27.577	OK
ENSG00000087258	-	-	ENSG00000087258	GNAO1	-	16:56225301-56391356	-	-	0.160522	0	2.06934	OK	0.0351049	0	2.29785	OK	0.0300357	0	2.2869	OK	0.065827	0	1.96309	OK
ENSG00000087263	-	-	ENSG00000087263	OGFOD1	-	16:56463044-56554195	-	-	16.1867	1.86826	30.5051	OK	19.8755	4.7386	35.0123	OK	22.2585	7.68588	36.831	OK	15.9722	4.46255	27.4819	OK
ENSG00000087266	-	-	ENSG00000087266	SH3BP2	-	4:2794749-2842825	-	-	21.6455	6.58797	36.703	OK	20.1433	4.61164	35.675	OK	19.3062	6.44327	32.1692	OK	26.5992	12.0692	41.1292	OK
ENSG00000087269	-	-	ENSG00000087269	NOP14	-	4:2936625-2965112	-	-	13.7749	9.28743	18.2624	OK	13.6941	10.1428	17.2454	OK	14.8822	11.0858	18.6786	OK	14.1489	8.22642	20.0715	OK
ENSG00000087274	-	-	ENSG00000087274	ADD1	-	4:2845583-2931803	-	-	104.92	47.9329	161.907	OK	96.3838	36.4081	156.36	OK	81.0112	32.8608	129.162	OK	71.7788	30.4163	113.141	OK
ENSG00000087299	-	-	ENSG00000087299	L2HGDH	-	14:50704280-50883179	-	-	0.799188	0	2.30074	OK	0.85674	0	2.25031	OK	1.24117	0	2.7786	OK	0.613165	0	1.98776	OK
ENSG00000087301	-	-	ENSG00000087301	TXNDC16	-	14:52897307-53019240	-	-	1.84408	0	4.55113	OK	1.18432	0	2.69801	OK	1.29398	0	2.85801	OK	0.927794	0	2.43583	OK
ENSG00000087302	-	-	ENSG00000087302	C14orf166	-	14:52456192-52471420	-	-	187.568	131.236	243.899	OK	206.118	150.908	261.327	OK	178.906	132.043	225.77	OK	198.102	145.917	250.287	OK
ENSG00000087303	-	-	ENSG00000087303	NID2	-	14:52471520-52535712	-	-	16.511	7.70171	25.3203	OK	31.0637	19.705	42.4225	OK	47.4399	30.85	64.0298	OK	46.6409	30.1895	63.0923	OK
ENSG00000087338	-	-	ENSG00000087338	GMCL1	-	2:70056773-70108528	-	-	7.51116	4.80712	10.2152	OK	7.28776	4.33602	10.2395	OK	9.93321	5.84296	14.0235	OK	9.04842	5.81122	12.2856	OK
ENSG00000087365	-	-	ENSG00000087365	SF3B2	-	11:65818199-65837090	-	-	39.3255	24.3588	54.2923	OK	35.696	21.4013	49.9906	OK	38.396	24.3409	52.4512	OK	41.3793	28.1654	54.5932	OK
ENSG00000087448	-	-	ENSG00000087448	KLHL42	-	12:27932753-27955973	-	-	4.58097	2.75054	6.41141	OK	7.14456	4.44253	9.84658	OK	5.67951	3.37873	7.98029	OK	6.1626	3.96329	8.36192	OK
ENSG00000087460	-	-	ENSG00000087460	GNAS	-	20:57393973-57486247	-	-	404.686	308.029	501.343	OK	355.52	270.702	440.338	OK	423.668	320.107	527.228	OK	562.711	430.487	694.935	OK
ENSG00000087470	-	-	ENSG00000087470	DNM1L	-	12:32832133-32908836	-	-	30.1333	12.9421	47.3246	OK	27.7108	12.002	43.4195	OK	25.1644	13.479	36.8499	OK	32.6353	15.1633	50.1074	OK
ENSG00000087494	-	-	ENSG00000087494	PTHLH	-	12:28111016-28125638	-	-	0.502057	0	1.95333	OK	1.2336	0	3.16662	OK	0.38937	0	1.78326	OK	0.313234	0	1.5495	OK
ENSG00000087495	-	-	ENSG00000087495	PHACTR3	-	20:58152563-58422766	-	-	0	0	0	OK	0.0292309	0	0.915365	OK	0	0	0	OK	0	0	0	OK
ENSG00000087502	-	-	ENSG00000087502	ERGIC2	-	12:29302035-29534122	-	-	49.1878	19.1256	79.25	OK	68.1852	27.6036	108.767	OK	61.1421	33.8229	88.4613	OK	65.9733	35.1176	96.8289	OK
ENSG00000087510	-	-	ENSG00000087510	TFAP2C	-	20:55204357-55214339	-	-	0	0	0	OK	0	0	0	OK	0	0	0	OK	0.0246434	0	0.783781	OK
ENSG00000087586	-	-	ENSG00000087586	AURKA	-	20:54944444-54967393	-	-	17.2492	12.0352	22.4632	OK	12.4646	7.5162	17.4129	OK	18.8954	12.9526	24.8382	OK	11.9918	7.6085	16.375	OK
ENSG00000087589	-	-	ENSG00000087589	CASS4	-	20:54987167-55034396	-	-	0	0	0	OK	0	0	0	OK	0	0	0	OK	0.0222894	0	0.306373	OK
ENSG00000087842	-	-	ENSG00000087842	PIR	-	X:15402920-15574652	-	-	131.811	79.0246	184.597	OK	104.656	64.4475	144.865	OK	97.3625	64.1578	130.567	OK	78.4569	48.7904	108.123	OK
ENSG00000087884	-	-	ENSG00000087884	AAMDC	-	11:77532154-77705724	-	-	33.9225	18.1455	49.6994	OK	23.7428	9.91343	37.5722	OK	29.7841	14.4745	45.0938	OK	25.4388	12.7201	38.1574	OK
ENSG00000087903	-	-	ENSG00000087903	RFX2	-	19:5978413-6199583	-	-	8.73475	0	17.6208	OK	5.33548	0	12.3414	OK	3.94982	0	8.92648	OK	2.4828	0	8.61584	OK
ENSG00000087916	-	-	ENSG00000087916	SLC6A14	-	X:115567789-115592625	-	-	0	0	0	OK	0.00872786	0	0.996196	OK	0.0204983	0	1.0088	OK	0	0	0	OK
ENSG00000087995	-	-	ENSG00000087995	METTL2A	-	17:60501227-60527454	-	-	1.95124	0.77445	3.12804	OK	2.01538	0.276707	3.75405	OK	1.68098	0.597063	2.76489	OK	2.51531	0.845405	4.18522	OK
ENSG00000088002	-	-	ENSG00000088002	SULT2B1	-	19:49055331-49102682	-	-	0.195422	0	1.00806	OK	0.0336986	0	0.718024	OK	0.232741	0	1.09477	OK	0.453619	0	1.35269	OK
ENSG00000088035	-	-	ENSG00000088035	ALG6	-	1:63833260-63904233	-	-	9.73869	5.39552	14.0819	OK	7.72898	4.13851	11.3195	OK	5.63214	2.8767	8.38758	OK	6.54058	3.47331	9.60785	OK
ENSG00000088038	-	-	ENSG00000088038	CNOT3	-	19:54641443-54663620	-	-	26.0302	17.0448	35.0155	OK	31.6393	19.4092	43.8695	OK	44.5531	29.7598	59.3463	OK	28.1217	17.7118	38.5317	OK
ENSG00000088053	-	-	ENSG00000088053	GP6	-	19:55517560-55582659	-	-	0.71132	0	1.70643	OK	0.381004	0	1.27701	OK	0.255748	0	1.18129	OK	0.371154	0	1.35922	OK
ENSG00000088179	-	-	ENSG00000088179	PTPN4	-	2:120517206-120741394	-	-	7.7556	1.18279	14.3284	OK	5.24008	1.01847	9.46168	OK	3.43349	0	7.30448	OK	3.73351	0.0490511	7.41796	OK
ENSG00000088205	-	-	ENSG00000088205	DDX18	-	2:118572225-118589955	-	-	16.3052	10.2225	22.3879	OK	23.6235	15.1009	32.1461	OK	22.7273	14.6045	30.8502	OK	16.3809	11.0221	21.7396	OK
ENSG00000088247	-	-	ENSG00000088247	KHSRP	-	19:6413358-6424805	-	-	103.784	64.4501	143.117	OK	80.8794	51.2124	110.546	OK	115.667	68.823	162.512	OK	83.4659	52.6607	114.271	OK
ENSG00000088256	-	-	ENSG00000088256	GNA11	-	19:3094407-3124002	-	-	21.7319	15.0167	28.4471	OK	20.1922	12.8147	27.5696	OK	20.8293	14.3891	27.2696	OK	22.826	14.2199	31.4322	OK
ENSG00000088280	-	-	ENSG00000088280	ASAP3	-	1:23755055-23811061	-	-	9.74118	2.85011	16.6322	OK	3.49195	0.699596	6.28431	OK	3.88517	0.32068	7.44965	OK	2.6571	0.559347	4.75485	OK
ENSG00000088298	-	-	ENSG00000088298	EDEM2	-	20:33703166-33872788	-	-	12.8894	3.26188	22.5168	OK	9.82446	1.42443	18.2245	OK	11.2609	2.73277	19.789	OK	12.3626	4.19831	20.527	OK
ENSG00000088305	-	-	ENSG00000088305	DNMT3B	-	20:31350190-31397162	-	-	2.00868	1.10409	2.91327	OK	0.808167	0.257425	1.35891	OK	1.18543	0.503316	1.86755	OK	1.12069	0.449927	1.79144	OK
ENSG00000088320	-	-	ENSG00000088320	REM1	-	20:30053308-30072708	-	-	0	0	0	OK	0.0335527	0	0.213577	OK	0.114865	0	0.396211	OK	0	0	0	OK
ENSG00000088325	-	-	ENSG00000088325	TPX2	-	20:30327073-30389608	-	-	17.8134	13.6172	22.0096	OK	13.8947	10.579	17.2103	OK	15.0137	11.4215	18.6058	OK	10.339	7.78957	12.8884	OK
ENSG00000088340	-	-	ENSG00000088340	FER1L4	-	20:34146506-34195484	-	-	0.0863919	0	2.14899	OK	0.301299	0	2.52918	OK	0.279451	0	2.08418	OK	0.823239	0	3.14092	OK
ENSG00000088356	-	-	ENSG00000088356	PDRG1	-	20:30435439-30539895	-	-	3.49095	1.96675	5.01515	OK	2.5939	1.3687	3.81911	OK	3.67627	2.05252	5.30002	OK	3.37698	1.85045	4.90351	OK
ENSG00000088367	-	-	ENSG00000088367	EPB41L1	-	20:34679425-34820721	-	-	3.20505	0.19706	6.21304	OK	2.54186	0	5.60939	OK	2.49396	0	5.74677	OK	1.03982	0	3.7777	OK
ENSG00000088386	-	-	ENSG00000088386	SLC15A1	-	13:99336054-99404908	-	-	0	0	0	OK	0.110635	0	0.379932	OK	0.15567	0	0.466072	OK	0.0969217	0	0.379372	OK
ENSG00000088387	-	-	ENSG00000088387	DOCK9	-	13:99445740-99738879	-	-	108.847	18.8198	198.874	OK	101.485	21.056	181.915	OK	117.746	31.8873	203.604	OK	123.17	45.9015	200.438	OK
ENSG00000088448	-	-	ENSG00000088448	ANKRD10	-	13:111530886-111567416	-	-	28.432	16.1357	40.7282	OK	32.965	18.3492	47.5808	OK	65.8749	48.3221	83.4278	OK	51.5182	31.6943	71.3421	OK
ENSG00000088451	-	-	ENSG00000088451	TGDS	-	13:95226307-95248511	-	-	2.75666	1.23085	4.28246	OK	2.47481	1.07858	3.87104	OK	5.22912	3.13516	7.32309	OK	3.67939	2.00104	5.35775	OK
ENSG00000088538	-	-	ENSG00000088538	DOCK3	-	3:50712671-51421629	-	-	0.0480518	0	0.125189	OK	0.0734738	0	0.151114	OK	0.0191521	0	0.0680455	OK	0.00981083	0	0.0408325	OK
ENSG00000088543	-	-	ENSG00000088543	C3orf18	-	3:50595461-50622366	-	-	1.23666	0	3.24647	OK	0.441503	0	2.04086	OK	0.229827	0	1.69548	OK	0.403527	0	2.01374	OK
ENSG00000088682	-	-	ENSG00000088682	COQ9	-	16:57462080-57521239	-	-	17.1521	7.4171	26.8871	OK	11.2409	4.71843	17.7634	OK	12.8671	6.20883	19.5253	OK	15.8064	7.7452	23.8676	OK
ENSG00000088726	-	-	ENSG00000088726	TMEM40	-	3:12775023-12810956	-	-	0.19204	0	1.8303	OK	0.543556	0	2.31709	OK	0	0	0	OK	0	0	0	OK
ENSG00000088727	-	-	ENSG00000088727	KIF9	-	3:47205986-47388306	-	-	13.3141	4.04292	22.5853	OK	10.2474	2.29862	18.1963	OK	7.75554	1.24282	14.2683	OK	12.5859	3.80802	21.3638	OK
ENSG00000088756	-	-	ENSG00000088756	ARHGAP28	-	18:6728819-6915715	-	-	5.20063	1.21629	9.18496	OK	3.53209	1.43454	5.62964	OK	1.3639	0	3.48396	OK	1.67141	0	3.78456	OK
ENSG00000088766	-	-	ENSG00000088766	CRLS1	-	20:5986735-6020699	-	-	19.5112	10.8166	28.2058	OK	18.1426	9.34921	26.936	OK	22.0723	12.2913	31.8532	OK	23.5483	13.1353	33.9614	OK
ENSG00000088782	-	-	ENSG00000088782	DEFB127	-	20:138110-139804	-	-	0	0	0	OK	0	0	0	OK	0	0	0	OK	0	0	0	OK
ENSG00000088808	-	-	ENSG00000088808	PPP1R13B	-	14:104200088-104313927	-	-	11.3672	2.6509	20.0835	OK	5.8853	1.1235	10.6471	OK	7.914	3.3037	12.5243	OK	8.27842	3.82708	12.7298	OK
ENSG00000088812	-	-	ENSG00000088812	ATRN	-	20:3451686-3631769	-	-	8.90655	6.58801	11.2251	OK	8.65007	6.44676	10.8534	OK	9.56073	7.05797	12.0635	OK	9.51796	7.10669	11.9292	OK
ENSG00000088826	-	-	ENSG00000088826	SMOX	-	20:4101626-4168394	-	-	7.28699	1.83269	12.7413	OK	8.28217	0	21.1852	OK	7.79248	3.28976	12.2952	OK	9.2544	4.62154	13.8873	OK
ENSG00000088827	-	-	ENSG00000088827	SIGLEC1	-	20:3667616-3687775	-	-	0	0	0	OK	0	0	0	OK	0	0	0	OK	0	0	0	OK
ENSG00000088832	-	-	ENSG00000088832	FKBP1A	-	20:1290618-1373806	-	-	444.605	332.707	556.503	OK	434.004	323.227	544.781	OK	646.845	432.299	861.392	OK	651.324	458.795	843.854	OK
ENSG00000088833	-	-	ENSG00000088833	NSFL1C	-	20:1422806-1472233	-	-	34.2543	23.9748	44.5339	OK	25.7939	17.9839	33.6039	OK	27.5753	18.9022	36.2485	OK	24.8283	16.9306	32.7261	OK
ENSG00000088836	-	-	ENSG00000088836	SLC4A11	-	20:3208062-3219836	-	-	5.17518	1.20903	9.14133	OK	3.3902	0.721287	6.05912	OK	3.98154	0.26093	7.70214	OK	3.44193	0.660329	6.22353	OK
ENSG00000088854	-	-	ENSG00000088854	C20orf194	-	20:3229950-3388272	-	-	5.34127	3.88484	6.7977	OK	5.16699	3.77267	6.56131	OK	6.67368	4.93026	8.4171	OK	6.03071	4.39995	7.66147	OK
ENSG00000088876	-	-	ENSG00000088876	ZNF343	-	20:2442279-2505348	-	-	1.92654	0.128791	3.72429	OK	1.43724	0.262159	2.61232	OK	1.83434	0.469829	3.19885	OK	3.63915	0.0302335	7.24807	OK
ENSG00000088881	-	-	ENSG00000088881	EBF4	-	20:2673523-2740753	-	-	1.93992	0	5.37448	OK	0.730889	0	2.75427	OK	1.07778	0	3.45539	OK	2.53452	0	6.31627	OK
ENSG00000088882	-	-	ENSG00000088882	CPXM1	-	20:2774714-2781283	-	-	1.10586	0.378909	1.83281	OK	0.605283	0.110499	1.10007	OK	0.813008	0.188944	1.43707	OK	1.94329	0.933461	2.95312	OK
ENSG00000088888	-	-	ENSG00000088888	MAVS	-	20:3827486-3849280	-	-	13.0796	8.77736	17.3818	OK	8.85217	5.26787	12.4365	OK	11.8196	7.56002	16.0792	OK	10.3742	6.6968	14.0515	OK
ENSG00000088899	-	-	ENSG00000088899	LZTS3	-	20:3143262-3154192	-	-	1.0186	0.440236	1.59696	OK	0.775424	0.306926	1.24392	OK	0.638511	0.179113	1.09791	OK	0.432255	0.083963	0.780548	OK
ENSG00000088926	-	-	ENSG00000088926	F11	-	4:187187098-187476721	-	-	0	0	0	OK	0	0	0	OK	0	0	0	OK	0	0	0	OK
ENSG00000088930	-	-	ENSG00000088930	XRN2	-	20:21283941-21370463	-	-	21.9438	16.7075	27.18	OK	22.6807	17.2626	28.0988	OK	24.6587	18.808	30.5095	OK	18.9247	14.3053	23.544	OK
ENSG00000088970	-	-	ENSG00000088970	PLK1S1	-	20:21106623-21227260	-	-	3.31871	0.328379	6.30904	OK	2.47133	0	5.17501	OK	1.8832	0	4.27115	OK	1.97859	0	4.45332	OK
ENSG00000088986	-	-	ENSG00000088986	DYNLL1	-	12:120907652-120936296	-	-	272.188	207.428	336.948	OK	308.362	235.043	381.68	OK	280.148	213.166	347.129	OK	388.14	294.236	482.044	OK
ENSG00000088992	-	-	ENSG00000088992	TESC	-	12:117476727-117537284	-	-	0	0	0	OK	0.417677	0	2.75673	OK	1.49369	0	6.10669	OK	1.21078	0	3.6318	OK
ENSG00000089006	-	-	ENSG00000089006	SNX5	-	20:17922240-18039832	-	-	69.7864	47.8692	91.7037	OK	68.7989	47.6532	89.9446	OK	75.0881	52.3069	97.8692	OK	63.3896	41.0445	85.7348	OK
ENSG00000089009	-	-	ENSG00000089009	RPL6	-	12:112842993-112947717	-	-	353.62	263.279	443.961	OK	328.777	242.315	415.24	OK	367.548	267.267	467.829	OK	388.398	277.722	499.075	OK
ENSG00000089012	-	-	ENSG00000089012	SIRPG	-	20:1609797-1638425	-	-	0	0	0	OK	0	0	0	OK	0	0	0	OK	0	0	0	OK
ENSG00000089022	-	-	ENSG00000089022	MAPKAPK5	-	12:112277570-112334343	-	-	10.3461	5.99151	14.7006	OK	8.9606	5.01604	12.9052	OK	14.9849	7.53603	22.4338	OK	12.012	6.02338	18.0006	OK
ENSG00000089041	-	-	ENSG00000089041	P2RX7	-	12:121570621-121623876	-	-	0.785728	0	2.87431	OK	0.636045	0	1.89583	OK	0.981811	0	2.42251	OK	0.216553	0	1.29648	OK
ENSG00000089048	-	-	ENSG00000089048	ESF1	-	20:13694968-13765532	-	-	8.09551	6.11796	10.0731	OK	10.2397	7.81135	12.6681	OK	7.28756	5.47482	9.1003	OK	8.44295	6.35142	10.5345	OK
ENSG00000089050	-	-	ENSG00000089050	RBBP9	-	20:18467183-18477887	-	-	5.38572	3.21451	7.55693	OK	4.0849	2.58457	5.58523	OK	6.54735	4.18985	8.90485	OK	4.56935	2.85332	6.28537	OK
ENSG00000089053	-	-	ENSG00000089053	ANAPC5	-	12:121746047-121837699	-	-	38.1062	22.9796	53.2328	OK	26.4981	13.9398	39.0565	OK	30.7557	18.5868	42.9246	OK	31.7842	18.2255	45.3429	OK
ENSG00000089057	-	-	ENSG00000089057	SLC23A2	-	20:4833001-4990939	-	-	5.87763	3.85102	7.90424	OK	5.22451	3.19763	7.2514	OK	5.73696	3.70523	7.76868	OK	5.71732	3.66048	7.77416	OK
ENSG00000089060	-	-	ENSG00000089060	SLC8B1	-	12:113736563-113827203	-	-	6.49595	2.97758	10.0143	OK	6.08575	2.76864	9.40286	OK	7.58248	3.19158	11.9734	OK	7.72049	3.959	11.482	OK
ENSG00000089063	-	-	ENSG00000089063	TMEM230	-	20:5080485-5093749	-	-	54.5997	40.189	69.0103	OK	61.4075	45.7259	77.0891	OK	58.5866	43.2382	73.935	OK	66.7449	49.5584	83.9314	OK
ENSG00000089091	-	-	ENSG00000089091	DZANK1	-	20:18364010-18465287	-	-	1.13609	0	2.64609	OK	0.739457	0	1.91637	OK	0.804161	0	2.20369	OK	0.975027	0	2.21959	OK
ENSG00000089094	-	-	ENSG00000089094	KDM2B	-	12:121837843-122031409	-	-	6.45671	2.31608	10.5973	OK	5.40151	2.4223	8.38071	OK	6.22408	1.4393	11.0089	OK	5.34056	2.06427	8.61686	OK
ENSG00000089101	-	-	ENSG00000089101	C20orf26	-	20:20015011-20341346	-	-	0	0	0	OK	0	0	0	OK	0	0	0	OK	0.118658	0	2.70268	OK
ENSG00000089116	-	-	ENSG00000089116	LHX5	-	12:113899838-113918429	-	-	0	0	0	OK	0	0	0	OK	0	0	0	OK	0	0	0	OK
ENSG00000089123	-	-	ENSG00000089123	TASP1	-	20:13202417-13619587	-	-	1.91581	0.225215	3.6064	OK	2.00754	0.446667	3.56841	OK	2.8687	0.922571	4.81482	OK	1.84384	0.31759	3.3701	OK
ENSG00000089127	-	-	ENSG00000089127	OAS1	-	12:113344581-113455556	-	-	2.744	0	6.12877	OK	2.56954	0	5.8285	OK	1.63752	0	4.42247	OK	1.05805	0	3.47734	OK
ENSG00000089154	-	-	ENSG00000089154	GCN1L1	-	12:120565006-120632513	-	-	6.95381	3.12624	10.7814	OK	6.13986	0.393535	11.8862	OK	9.24374	0	21.332	OK	8.22266	2.89639	13.5489	OK
ENSG00000089157	-	-	ENSG00000089157	RPLP0	-	12:120634488-120639038	-	-	511.329	387.881	634.777	OK	414.629	319.519	509.738	OK	567.909	428.502	707.317	OK	636.094	484.82	787.367	OK
ENSG00000089159	-	-	ENSG00000089159	PXN	-	12:120639093-120703574	-	-	62.8091	40.9095	84.7086	OK	50.8368	31.9126	69.7609	OK	52.1094	28.5258	75.693	OK	36.64	23.5835	49.6966	OK
ENSG00000089163	-	-	ENSG00000089163	SIRT4	-	12:120740118-120751144	-	-	0.899217	0	2.49769	OK	0.181093	0	1.15181	OK	0.244932	0	1.19561	OK	0.646894	0	2.08696	OK
ENSG00000089169	-	-	ENSG00000089169	RPH3A	-	12:113008183-113336686	-	-	0	0	0	OK	0	0	0	OK	0	0	0	OK	0	0	0	OK
ENSG00000089177	-	-	ENSG00000089177	KIF16B	-	20:16252748-16554078	-	-	1.60509	0.0058059	3.20437	OK	1.16331	0.578468	1.74815	OK	1.86151	0.557613	3.1654	OK	1.41917	0.460597	2.37775	OK
ENSG00000089195	-	-	ENSG00000089195	TRMT6	-	20:5917880-5931182	-	-	3.95911	2.64752	5.27069	OK	3.6818	2.48513	4.87847	OK	4.30736	2.91012	5.7046	OK	2.87406	1.86533	3.88279	OK
ENSG00000089199	-	-	ENSG00000089199	CHGB	-	20:5892075-5906007	-	-	0.0477901	0	0.42507	OK	0.0909922	0	0.3682	OK	0.00558574	0	0.367675	OK	0.119445	0	0.374453	OK
ENSG00000089220	-	-	ENSG00000089220	PEBP1	-	12:118501397-118583389	-	-	63.8231	42.3072	85.339	OK	56.4526	38.7685	74.1367	OK	48.2447	34.1855	62.304	OK	49.682	35.3913	63.9727	OK
ENSG00000089225	-	-	ENSG00000089225	TBX5	-	12:114791735-114850636	-	-	0	0	0	OK	0	0	0	OK	0	0	0	OK	0	0	0	OK
ENSG00000089234	-	-	ENSG00000089234	BRAP	-	12:112079949-112123790	-	-	8.27794	5.70557	10.8503	OK	8.16704	5.68617	10.6479	OK	9.68108	6.95592	12.4062	OK	8.04609	5.61729	10.4749	OK
ENSG00000089248	-	-	ENSG00000089248	ERP29	-	12:112451119-112461255	-	-	42.9492	31.8128	54.0855	OK	37.5676	23.0085	52.1267	OK	44.0405	32.8141	55.2668	OK	57.4018	43.2051	71.5984	OK
ENSG00000089250	-	-	ENSG00000089250	NOS1	-	12:117645946-117889975	-	-	0.0254093	0	1.02629	OK	0	0	0	OK	0.00609981	0	1.00286	OK	0.00510253	0	0.99767	OK
ENSG00000089280	-	-	ENSG00000089280	FUS	-	16:31191430-31203127	-	-	150.142	88.5157	211.768	OK	169.945	100.584	239.307	OK	152.952	85.8451	220.059	OK	141.993	85.0286	198.958	OK
ENSG00000089289	-	-	ENSG00000089289	IGBP1	-	X:69353298-69386174	-	-	17.9413	13.3004	22.5822	OK	17.2323	12.8284	21.6362	OK	17.6495	13.0122	22.2869	OK	17.4764	12.9529	21.9999	OK
ENSG00000089327	-	-	ENSG00000089327	FXYD5	-	19:35645632-35660786	-	-	154.694	117.427	191.961	OK	156.903	119.659	194.147	OK	152.574	115.278	189.869	OK	198.849	151.517	246.182	OK
ENSG00000089335	-	-	ENSG00000089335	ZNF302	-	19:35168543-35177302	-	-	8.50355	4.13748	12.8696	OK	6.75324	3.07689	10.4296	OK	7.41069	3.72107	11.1003	OK	8.59442	4.50139	12.6874	OK
ENSG00000089351	-	-	ENSG00000089351	GRAMD1A	-	19:35485687-35517375	-	-	26.9437	18.0022	35.8852	OK	21.3569	14.0819	28.6318	OK	32.7631	20.3755	45.1506	OK	38.3132	25.4565	51.1698	OK
ENSG00000089356	-	-	ENSG00000089356	FXYD3	-	19:35606731-35615228	-	-	0	0	0	OK	0	0	0	OK	0	0	0	OK	0	0	0	OK
ENSG00000089472	-	-	ENSG00000089472	HEPH	-	X:65382390-65488709	-	-	0	0	0	OK	0	0	0	OK	0	0	0	OK	0	0	0	OK
ENSG00000089486	-	-	ENSG00000089486	CDIP1	-	16:4560675-4588829	-	-	4.14196	0.575775	7.70814	OK	2.13098	0	5.35433	OK	3.16275	0	6.32659	OK	3.27215	0	6.75363	OK
ENSG00000089505	-	-	ENSG00000089505	CMTM1	-	16:66586465-66613040	-	-	0.368306	0	3.17777	OK	1.39904	0	4.58592	OK	0.210945	0	2.85364	OK	3.04547	0	11.5218	OK
ENSG00000089558	-	-	ENSG00000089558	KCNH4	-	17:40308908-40333296	-	-	0.164045	0	0.474188	OK	0.0648829	0	0.316357	OK	0.0201786	0	0.184082	OK	0	0	0	OK
ENSG00000089597	-	-	ENSG00000089597	GANAB	-	11:62392297-62414104	-	-	109.468	82.4438	136.493	OK	99.0393	73.0256	125.053	OK	111.926	84.6023	139.25	OK	115.758	87.3223	144.195	OK
ENSG00000089639	-	-	ENSG00000089639	GMIP	-	19:19740284-19754476	-	-	5.26917	2.089	8.44935	OK	3.70063	1.0011	6.40016	OK	3.27212	1.10285	5.44139	OK	4.40547	1.55588	7.25507	OK
ENSG00000089682	-	-	ENSG00000089682	RBM41	-	X:106307649-106362057	-	-	4.94133	2.01085	7.87181	OK	4.32557	0.0396074	8.61154	OK	4.8305	0.721318	8.93968	OK	4.16458	1.14431	7.18484	OK
ENSG00000089685	-	-	ENSG00000089685	BIRC5	-	17:76210266-76221717	-	-	15.3455	8.10246	22.5886	OK	8.89599	4.41921	13.3728	OK	11.0786	4.61504	17.5422	OK	8.49942	3.74479	13.2541	OK
ENSG00000089692	-	-	ENSG00000089692	LAG3	-	12:6881677-6887621	-	-	0.7328	0	1.80524	OK	0.0889928	0	0.828198	OK	0.536471	0	1.43284	OK	0.896972	0	2.62969	OK
ENSG00000089693	-	-	ENSG00000089693	MLF2	-	12:6857169-6880116	-	-	46.4225	11.8752	80.9699	OK	42.5953	7.99556	77.1951	OK	56.3005	19.7293	92.8718	OK	54.5238	20.7765	88.2711	OK
ENSG00000089723	-	-	ENSG00000089723	OTUB2	-	14:94492674-94515276	-	-	0.612628	0	1.24385	OK	0.751252	0	1.58375	OK	0.399575	0	1.04149	OK	0.393381	0	1.03027	OK
ENSG00000089737	-	-	ENSG00000089737	DDX24	-	14:94517265-94547591	-	-	20.575	12.4663	28.6838	OK	21.5763	5.77706	37.3755	OK	23.4636	15.3113	31.616	OK	22.659	14.1169	31.2011	OK
ENSG00000089775	-	-	ENSG00000089775	ZBTB25	-	14:64854748-65009955	-	-	7.11763	0	18.3507	OK	3.86359	0	10.7709	OK	3.54689	0	10.113	OK	3.52945	0	9.68584	OK
ENSG00000089818	-	-	ENSG00000089818	NECAP1	-	12:8234806-8250367	-	-	5.35738	2.53065	8.18411	OK	7.92981	3.37055	12.4891	OK	10.5611	5.46306	15.6591	OK	8.1673	4.14747	12.1871	OK
ENSG00000089820	-	-	ENSG00000089820	ARHGAP4	-	X:153126968-153200676	-	-	5.58667	0	13.0726	OK	3.33158	0	8.74797	OK	3.11448	0	8.19143	OK	4.17978	0	9.77891	OK
ENSG00000089847	-	-	ENSG00000089847	ANKRD24	-	19:4183350-4224811	-	-	0.179986	0	1.04753	OK	0.0823544	0	0.755953	OK	0.0461141	0	0.800276	OK	0.0429052	0	0.76149	OK
ENSG00000089876	-	-	ENSG00000089876	DHX32	-	10:127512114-127585005	-	-	12.781	7.06663	18.4954	OK	13.1211	7.59102	18.6511	OK	12.7994	6.84792	18.7509	OK	13.9263	7.78301	20.0696	OK
ENSG00000089902	-	-	ENSG00000089902	RCOR1	-	14:103058997-103196913	-	-	10.7177	7.20612	14.2293	OK	10.9462	5.78912	16.1032	OK	12.8643	7.42976	18.2987	OK	7.28613	4.0409	10.5314	OK
ENSG00000089916	-	-	ENSG00000089916	GPATCH2L	-	14:76618258-76729817	-	-	4.75538	0.494395	9.01637	OK	6.64555	1.48544	11.8057	OK	7.11355	1.56465	12.6624	OK	5.25677	1.12302	9.39052	OK
ENSG00000090006	-	-	ENSG00000090006	LTBP4	-	19:41098788-41135725	-	-	7.29573	0	15.4158	OK	12.5601	0.0559267	25.0643	OK	8.85572	0	18.0162	OK	7.59206	0	15.8826	OK
ENSG00000090013	-	-	ENSG00000090013	BLVRB	-	19:40953695-40971747	-	-	12.522	7.00223	18.0418	OK	13.3261	7.35812	19.2942	OK	12.7961	7.00772	18.5845	OK	12.8675	6.98374	18.7513	OK
ENSG00000090020	-	-	ENSG00000090020	SLC9A1	-	1:27425305-27493472	-	-	31.1252	15.6633	46.587	OK	24.8535	13.0507	36.6563	OK	27.718	10.6606	44.7753	OK	34.8171	14.5942	55.04	OK
ENSG00000090054	-	-	ENSG00000090054	SPTLC1	-	9:94794280-94877666	-	-	33.2504	21.6908	44.81	OK	33.5922	24.3601	42.8244	OK	36.4686	26.8827	46.0544	OK	33.5831	23.0823	44.0839	OK
ENSG00000090060	-	-	ENSG00000090060	PAPOLA	-	14:96967146-97033448	-	-	61.7047	36.9737	86.4358	OK	63.3646	39.3116	87.4177	OK	60.0668	33.3157	86.8179	OK	53.6359	31.5467	75.725	OK
ENSG00000090061	-	-	ENSG00000090061	CCNK	-	14:99947505-100070363	-	-	31.486	14.6344	48.3377	OK	31.4387	17.2213	45.6561	OK	48.988	0	99.6376	OK	28.7245	7.26481	50.1842	OK
ENSG00000090097	-	-	ENSG00000090097	PCBP4	-	3:51989329-52023213	-	-	8.31024	3.69791	12.9226	OK	7.72796	3.67837	11.7775	OK	8.09963	3.58279	12.6165	OK	9.52895	4.73312	14.3248	OK
ENSG00000090104	-	-	ENSG00000090104	RGS1	-	1:192544856-192549161	-	-	0	0	0	OK	0	0	0	OK	0	0	0	OK	0	0	0	OK
ENSG00000090238	-	-	ENSG00000090238	YPEL3	-	16:30103634-30115437	-	-	46.457	22.0652	70.8487	OK	31.7035	18.9981	44.4089	OK	28.9045	12.3379	45.4711	OK	37.1671	20.9567	53.3776	OK
ENSG00000090263	-	-	ENSG00000090263	MRPS33	-	7:140705853-140715028	-	-	11.3158	6.91433	15.7173	OK	14.8858	8.73237	21.0393	OK	12.1196	7.53871	16.7006	OK	16.3252	10.5267	22.1237	OK
ENSG00000090266	-	-	ENSG00000090266	NDUFB2	-	7:140218219-140624564	-	-	105.296	61.2648	149.327	OK	71.2345	36.3958	106.073	OK	83.3517	40.064	126.639	OK	103.293	54.5239	152.062	OK
ENSG00000090273	-	-	ENSG00000090273	NUDC	-	1:27216978-27273353	-	-	23.7981	17.6385	29.9577	OK	23.1333	17.1975	29.069	OK	23.4848	17.3778	29.5918	OK	24.8134	18.3108	31.3161	OK
ENSG00000090316	-	-	ENSG00000090316	MAEA	-	4:1283638-1333935	-	-	30.2218	21.1012	39.3424	OK	25.8604	15.4615	36.2592	OK	29.0733	20.2084	37.9381	OK	28.8373	19.7757	37.8989	OK
ENSG00000090339	-	-	ENSG00000090339	ICAM1	-	19:10362576-10399695	-	-	12.0433	6.73434	17.3523	OK	50.0178	34.7637	65.2719	OK	50.4072	34.9029	65.9114	OK	12.0514	6.90617	17.1967	OK
ENSG00000090372	-	-	ENSG00000090372	STRN4	-	19:47222763-47291851	-	-	28.6267	13.1736	44.0797	OK	22.6273	10.4993	34.7552	OK	32.7122	14.3988	51.0256	OK	31.8646	16.1359	47.5932	OK
ENSG00000090376	-	-	ENSG00000090376	IRAK3	-	12:66582658-66651214	-	-	1.78059	1.1285	2.43267	OK	1.52208	0.915706	2.12846	OK	1.60767	0.896752	2.3186	OK	1.98517	1.22343	2.74691	OK
ENSG00000090382	-	-	ENSG00000090382	LYZ	-	12:69742120-69748014	-	-	0	0	0	OK	0.102828	0	0.965868	OK	0.115441	0	0.963698	OK	0.0594702	0	0.882132	OK
ENSG00000090402	-	-	ENSG00000090402	SI	-	3:164696685-164796283	-	-	0	0	0	OK	0	0	0	OK	0	0	0	OK	0	0	0	OK
ENSG00000090432	-	-	ENSG00000090432	MUL1	-	1:20825942-20834654	-	-	9.03721	6.12573	11.9487	OK	7.76017	5.20404	10.3163	OK	7.03695	4.57384	9.50006	OK	9.03459	6.1613	11.9079	OK
ENSG00000090447	-	-	ENSG00000090447	TFAP4	-	16:4307186-4323076	-	-	2.5797	0.601993	4.5574	OK	1.57164	0.0230414	3.12024	OK	2.87629	0.719266	5.03332	OK	3.07197	1.22188	4.92205	OK
ENSG00000090470	-	-	ENSG00000090470	PDCD7	-	15:65409716-65426174	-	-	10.0099	0.709206	19.3106	OK	7.19197	2.33741	12.0465	OK	7.89684	1.61326	14.1804	OK	9.86861	2.39474	17.3425	OK
ENSG00000090487	-	-	ENSG00000090487	SPG21	-	15:65255361-65282648	-	-	30.7533	21.7641	39.7424	OK	29.3096	20.4862	38.1331	OK	34.7538	24.1162	45.3914	OK	33.9419	23.9789	43.9049	OK
ENSG00000090512	-	-	ENSG00000090512	FETUB	-	3:186353757-186396029	-	-	0	0	0	OK	0	0	0	OK	0	0	0	OK	0	0	0	OK
ENSG00000090520	-	-	ENSG00000090520	DNAJB11	-	3:186256229-186315061	-	-	164.939	106.803	223.075	OK	264.045	168.547	359.544	OK	627.235	422.184	832.287	OK	636.868	440.501	833.235	OK
ENSG00000090530	-	-	ENSG00000090530	LEPREL1	-	3:189674516-189862635	-	-	1.72754	0	3.82887	OK	1.96789	0	4.1912	OK	10.1205	6.18007	14.0608	OK	19.5703	12.8201	26.3205	OK
ENSG00000090534	-	-	ENSG00000090534	THPO	-	3:183851806-184402546	-	-	0	0	0	OK	0	0	0	OK	0	0	0	OK	0.0392503	0	2.05619	OK
ENSG00000090539	-	-	ENSG00000090539	CHRD	-	3:183851806-184402546	-	-	0.152434	0	2.60619	OK	0.0718327	0	2.18587	OK	0	0	0	OK	0.00935619	0	1.82381	OK
ENSG00000090554	-	-	ENSG00000090554	FLT3LG	-	19:49949554-49995565	-	-	1.98825	0	15.4438	OK	1.70836	0	11.2351	OK	2.52892	0	18.1142	OK	2.96221	0	20.4508	OK
ENSG00000090565	-	-	ENSG00000090565	RAB11FIP3	-	16:475618-573011	-	-	10.7137	4.20659	17.2207	OK	6.33969	1.69433	10.985	OK	10.7227	3.67749	17.7679	OK	8.07211	2.78962	13.3546	OK
ENSG00000090581	-	-	ENSG00000090581	GNPTG	-	16:1401923-1464752	-	-	11.8666	3.17846	20.5548	OK	9.72056	3.28492	16.1562	OK	11.2777	5.91437	16.6411	OK	10.6863	5.43306	15.9396	OK
ENSG00000090612	-	-	ENSG00000090612	ZNF268	-	12:133707160-133783698	-	-	5.43547	1.8938	8.97714	OK	5.68669	2.14962	9.22376	OK	5.73828	1.11494	10.3616	OK	5.53054	1.7825	9.27857	OK
ENSG00000090615	-	-	ENSG00000090615	GOLGA3	-	12:133345494-133532892	-	-	12.2133	0	24.6729	OK	13.2828	0	29.2755	OK	19.2388	0	39.6506	OK	16.8725	0	34.2479	OK
ENSG00000090621	-	-	ENSG00000090621	PABPC4	-	1:40026487-40042462	-	-	81.7536	48.967	114.54	OK	75.5348	42.9521	108.118	OK	83.0993	47.7243	118.474	OK	78.7058	43.9702	113.441	OK
ENSG00000090659	-	-	ENSG00000090659	CD209	-	19:7804878-7812464	-	-	0.0538442	0	1.47923	OK	0.0749945	0	1.24752	OK	0.0383037	0	1.4485	OK	0.011059	0	1.4236	OK
ENSG00000090661	-	-	ENSG00000090661	CERS4	-	19:8271619-8327305	-	-	0.354922	0	2.35064	OK	0.503282	0	2.54847	OK	0.478269	0	2.80877	OK	0.601805	0	3.06714	OK
ENSG00000090674	-	-	ENSG00000090674	MCOLN1	-	19:7587511-7626650	-	-	9.24949	0.436827	18.0622	OK	6.99711	0.716487	13.2777	OK	8.45342	1.00621	15.9006	OK	7.81401	0.591857	15.0362	OK
ENSG00000090686	-	-	ENSG00000090686	USP48	-	1:22004790-22110099	-	-	48.6273	16.0843	81.1703	OK	52.6126	22.0467	83.1784	OK	39.8361	19.4899	60.1824	OK	39.1245	18.8869	59.3621	OK
ENSG00000090776	-	-	ENSG00000090776	EFNB1	-	X:68048839-68061990	-	-	6.51295	4.3491	8.6768	OK	5.56006	3.66234	7.45778	OK	7.12342	4.7934	9.45344	OK	11.0741	7.8446	14.3037	OK
ENSG00000090857	-	-	ENSG00000090857	PDPR	-	16:70147528-70221264	-	-	3.55086	0.40822	6.69349	OK	1.86585	0.126657	3.60505	OK	2.9551	0	5.92061	OK	2.15604	0.335652	3.97643	OK
ENSG00000090861	-	-	ENSG00000090861	AARS	-	16:70286197-70323446	-	-	26.5035	12.473	40.5341	OK	20.5642	13.2346	27.8937	OK	52.5388	34.9417	70.1359	OK	32.6823	20.6778	44.6867	OK
ENSG00000090863	-	-	ENSG00000090863	GLG1	-	16:74485855-74641012	-	-	42.2981	31.9969	52.5994	OK	40.0961	29.4965	50.6957	OK	40.4801	28.5261	52.4341	OK	43.5796	32.3746	54.7845	OK
ENSG00000090889	-	-	ENSG00000090889	KIF4A	-	X:69506444-69640682	-	-	4.6089	2.16971	7.04809	OK	2.94842	1.61104	4.2858	OK	4.17034	2.29903	6.04164	OK	2.35984	1.11137	3.6083	OK
ENSG00000090905	-	-	ENSG00000090905	TNRC6A	-	16:24741015-24838953	-	-	23.9577	2.96758	44.9477	OK	22.6087	0	51.5422	OK	40.0406	0	80.144	OK	34.8779	0	73.7418	OK
ENSG00000090920	-	-	ENSG00000090920	FCGBP	-	19:40353962-40440533	-	-	0	0	0	OK	0	0	0	OK	0	0	0	OK	0	0	0	OK
ENSG00000090924	-	-	ENSG00000090924	PLEKHG2	-	19:39903224-39919055	-	-	10.0662	4.45974	15.6727	OK	21.8132	0	50.4788	OK	11.5782	5.02962	18.1268	OK	9.68788	3.2689	16.1069	OK
ENSG00000090932	-	-	ENSG00000090932	DLL3	-	19:39989534-39999121	-	-	0.2203	0	1.45461	OK	0.12031	0	1.31446	OK	0.0516294	0	1.22011	OK	0.190073	0	1.41901	OK
ENSG00000090971	-	-	ENSG00000090971	NAT14	-	19:55996370-55998935	-	-	8.16912	3.40866	12.9296	OK	8.0766	3.63272	12.5205	OK	6.33301	1.84988	10.8161	OK	8.03633	3.97115	12.1015	OK
ENSG00000090975	-	-	ENSG00000090975	PITPNM2	-	12:123468026-123634562	-	-	4.6893	1.21762	8.16099	OK	2.44225	0.924912	3.95959	OK	3.27543	1.02008	5.53078	OK	2.74343	0.908671	4.5782	OK
ENSG00000090989	-	-	ENSG00000090989	EXOC1	-	4:56719781-56771200	-	-	14.667	8.36524	20.9687	OK	12.0808	7.57364	16.588	OK	10.7318	6.15866	15.305	OK	12.8187	7.8178	17.8196	OK
ENSG00000091009	-	-	ENSG00000091009	RBM27	-	5:145583112-145756526	-	-	5.92793	2.64704	9.20882	OK	6.3222	3.75766	8.88675	OK	5.97004	4.02635	7.91373	OK	5.12749	2.76118	7.4938	OK
ENSG00000091010	-	-	ENSG00000091010	POU4F3	-	5:145583112-145756526	-	-	0.355722	0	1.4167	OK	0	0	0	OK	0	0	0	OK	0.150788	0	0.852679	OK
ENSG00000091039	-	-	ENSG00000091039	OSBPL8	-	12:76745576-76953589	-	-	9.3753	1.80048	16.9501	OK	9.9238	4.31088	15.5367	OK	9.48297	4.55498	14.411	OK	7.45457	2.28565	12.6235	OK
ENSG00000091073	-	-	ENSG00000091073	DTX2	-	7:76090992-76135312	-	-	3.63821	0	7.49944	OK	1.9877	0	5.77831	OK	2.15787	0	4.85655	OK	2.36928	0	5.684	OK
ENSG00000091106	-	-	ENSG00000091106	NLRC4	-	2:32449521-32490923	-	-	0	0	0	OK	0	0	0	OK	0.103934	0	0.440632	OK	0.0308828	0	0.260152	OK
ENSG00000091127	-	-	ENSG00000091127	PUS7	-	7:105080107-105162714	-	-	35.9832	0.960611	71.0057	OK	7.98084	1.19492	14.7668	OK	18.7782	0	41.2045	OK	7.60569	0	17.1375	OK
ENSG00000091128	-	-	ENSG00000091128	LAMB4	-	7:107663992-107770801	-	-	0.283321	0	1.1857	OK	0.356181	0	1.09921	OK	0.205681	0	1.09268	OK	0.157492	0	0.882069	OK
ENSG00000091129	-	-	ENSG00000091129	NRCAM	-	7:107788067-108097161	-	-	28.7521	11.9358	45.5683	OK	32.8861	18.2608	47.5113	OK	62.0535	37.7795	86.3276	OK	38.4759	22.5872	54.3646	OK
ENSG00000091136	-	-	ENSG00000091136	LAMB1	-	7:107531414-107643700	-	-	263.739	141.539	385.939	OK	259.208	151.458	366.958	OK	214.862	118.388	311.336	OK	263.848	155.637	372.059	OK
ENSG00000091137	-	-	ENSG00000091137	SLC26A4	-	7:107294420-107358254	-	-	2.06661	0	4.74025	OK	0.472526	0	2.00502	OK	2.16213	0	4.7206	OK	3.87553	0.171394	7.57966	OK
ENSG00000091138	-	-	ENSG00000091138	SLC26A3	-	7:107405911-107443670	-	-	0	0	0	OK	0	0	0	OK	0	0	0	OK	0	0	0	OK
ENSG00000091140	-	-	ENSG00000091140	DLD	-	7:107531414-107643700	-	-	27.7312	0	61.2714	OK	28.1992	0	59.2296	OK	34.338	5.53762	63.1384	OK	25.5677	0	55.0235	OK
ENSG00000091157	-	-	ENSG00000091157	WDR7	-	18:54264438-54706076	-	-	2.62649	0	6.82478	OK	3.52756	0	10.5453	OK	4.26758	0	11.3771	OK	3.15214	0	9.46101	OK
ENSG00000091164	-	-	ENSG00000091164	TXNL1	-	18:54264438-54706076	-	-	60.1984	44.8612	75.5356	OK	58.8197	43.6608	73.9786	OK	54.0554	39.3394	68.7714	OK	50.2126	36.7137	63.7115	OK
ENSG00000091181	-	-	ENSG00000091181	IL5RA	-	3:3111232-3168297	-	-	0	0	0	OK	0	0	0	OK	0	0	0	OK	0	0	0	OK
ENSG00000091262	-	-	ENSG00000091262	ABCC6	-	16:16242784-16318118	-	-	0.194455	0	1.12664	OK	0.165849	0	1.09642	OK	0.291519	0	1.24806	OK	0.215654	0	1.16435	OK
ENSG00000091317	-	-	ENSG00000091317	CMTM6	-	3:32433162-32544900	-	-	28.3859	19.6659	37.1059	OK	26.3909	18.5394	34.2423	OK	34.8813	24.3187	45.4439	OK	27.333	17.81	36.856	OK
ENSG00000091409	-	-	ENSG00000091409	ITGA6	-	2:173292081-173489823	-	-	86.9684	50.4822	123.455	OK	95.3523	47.129	143.576	OK	151.408	85.0629	217.753	OK	214.77	124.135	305.405	OK
ENSG00000091428	-	-	ENSG00000091428	RAPGEF4	-	2:173541868-173917621	-	-	4.63309	0	11.9842	OK	4.3875	0.374221	8.40079	OK	9.51542	3.14438	15.8864	OK	7.92252	1.72859	14.1165	OK
ENSG00000091436	-	-	ENSG00000091436	MLTK	-	2:173940162-174146764	-	-	6.93399	4.71587	9.15211	OK	6.42701	4.36163	8.49238	OK	6.78252	4.56923	8.9958	OK	5.00631	3.207	6.80561	OK
ENSG00000091482	-	-	ENSG00000091482	SMPX	-	X:21724089-21776281	-	-	0	0	0	OK	0	0	0	OK	0	0	0	OK	0	0	0	OK
ENSG00000091483	-	-	ENSG00000091483	FH	-	1:241660902-241683061	-	-	21.0976	14.9844	27.2108	OK	22.5602	16.0317	29.0886	OK	23.7473	17.1166	30.3779	OK	28.3999	15.3482	41.4517	OK
ENSG00000091490	-	-	ENSG00000091490	SEL1L3	-	4:25749054-25931435	-	-	43.4679	29.008	57.9277	OK	43.26	29.5966	56.9234	OK	52.3677	34.2425	70.4929	OK	66.7918	43.9903	89.5933	OK
ENSG00000091513	-	-	ENSG00000091513	TF	-	3:133380841-133497850	-	-	0.13432	0	1.97607	OK	0.148731	0	2.01811	OK	0.0358339	0	2.4431	OK	0.276451	0	2.27564	OK
ENSG00000091527	-	-	ENSG00000091527	CDV3	-	3:133292573-133309105	-	-	68.5744	52.3707	84.7781	OK	115.703	87.789	143.618	OK	79.7934	60.6334	98.9533	OK	63.765	48.5743	78.9557	OK
ENSG00000091536	-	-	ENSG00000091536	MYO15A	-	17:18012019-18113268	-	-	0.0355007	0	1.70129	OK	0.166232	0	1.89729	OK	0.217147	0	1.97573	OK	0.0982121	0	1.7922	OK
ENSG00000091542	-	-	ENSG00000091542	ALKBH5	-	17:18012019-18113268	-	-	26.4302	19.0736	33.7867	OK	23.5099	17.0255	29.9943	OK	30.2492	22.1303	38.3682	OK	26.7561	19.2405	34.2716	OK
ENSG00000091583	-	-	ENSG00000091583	APOH	-	17:64208150-64252643	-	-	0	0	0	OK	0	0	0	OK	0	0	0	OK	0	0	0	OK
ENSG00000091592	-	-	ENSG00000091592	NLRP1	-	17:5402746-5522744	-	-	12.0668	7.02362	17.11	OK	9.80162	5.0183	14.5849	OK	13.7544	7.04987	20.4589	OK	13.1832	7.49969	18.8667	OK
ENSG00000091622	-	-	ENSG00000091622	PITPNM3	-	17:6347734-6459814	-	-	0.0793251	0	0.604686	OK	0.0884021	0	0.619378	OK	0.067285	0	0.60187	OK	0.0791949	0	0.603203	OK
ENSG00000091640	-	-	ENSG00000091640	SPAG7	-	17:4862520-4871167	-	-	40.649	28.3096	52.9885	OK	31.3496	22.684	40.0151	OK	41.5602	29.3512	53.7692	OK	38.5087	27.7757	49.2417	OK
ENSG00000091651	-	-	ENSG00000091651	ORC6	-	16:46723554-46732306	-	-	5.72335	2.36165	9.08505	OK	4.41707	2.08886	6.74527	OK	5.05549	2.74463	7.36634	OK	4.34531	2.11414	6.57647	OK
ENSG00000091656	-	-	ENSG00000091656	ZFHX4	-	8:77316232-77779521	-	-	0.41535	0	2.31183	OK	0.113726	0	1.7974	OK	0.0623317	0	1.81223	OK	0.206675	0	1.96899	OK
ENSG00000091664	-	-	ENSG00000091664	SLC17A6	-	11:22305275-22401049	-	-	0	0	0	OK	0	0	0	OK	0	0	0	OK	0	0	0	OK
ENSG00000091704	-	-	ENSG00000091704	CPA1	-	7:130020179-130027955	-	-	0	0	0	OK	0	0	0	OK	0	0	0	OK	0	0	0	OK
ENSG00000091732	-	-	ENSG00000091732	ZC3HC1	-	7:129593073-129691291	-	-	3.4191	0.922077	5.91611	OK	3.49106	0.965618	6.01651	OK	5.08992	1.54347	8.63638	OK	4.85814	1.38042	8.33587	OK
ENSG00000091831	-	-	ENSG00000091831	ESR1	-	6:151977825-152958936	-	-	0	0	0	OK	0.0823265	0	2.33361	OK	0.0770959	0	2.33346	OK	0.0690034	0	2.30426	OK
ENSG00000091844	-	-	ENSG00000091844	RGS17	-	6:153325593-153452384	-	-	0.605576	0.0688279	1.14232	OK	1.04355	0.366654	1.72044	OK	1.21131	0.483966	1.93865	OK	0.56497	0.157325	0.972615	OK
ENSG00000091879	-	-	ENSG00000091879	ANGPT2	-	8:6261071-6565730	-	-	28.9217	20.5929	37.2506	OK	31.7456	23.2939	40.1973	OK	66.3735	49.2213	83.5257	OK	67.0765	49.0999	85.0531	OK
ENSG00000091947	-	-	ENSG00000091947	TMEM101	-	17:42088555-42101314	-	-	5.62275	2.36956	8.87594	OK	5.48417	2.28284	8.6855	OK	7.51281	3.63691	11.3887	OK	9.34168	5.31457	13.3688	OK
ENSG00000091972	-	-	ENSG00000091972	CD200	-	3:112021324-112081659	-	-	4.1434	2.46479	5.82202	OK	5.93595	3.90646	7.96545	OK	15.096	10.3449	19.847	OK	7.74852	5.29816	10.1989	OK
ENSG00000091986	-	-	ENSG00000091986	CCDC80	-	3:112323406-112368377	-	-	24.977	13.9232	36.0308	OK	27.5812	15.2262	39.9363	OK	28.9156	16.5221	41.3091	OK	33.3351	19.0538	47.6164	OK
ENSG00000092009	-	-	ENSG00000092009	CMA1	-	14:24970799-24977894	-	-	0	0	0	OK	0	0	0	OK	0	0	0	OK	0	0	0	OK
ENSG00000092010	-	-	ENSG00000092010	PSME1	-	14:24605366-24610797	-	-	18.0995	12.5277	23.6712	OK	16.5192	10.0793	22.9592	OK	16.8243	10.7109	22.9377	OK	18.4273	12.6701	24.1845	OK
ENSG00000092020	-	-	ENSG00000092020	PPP2R3C	-	14:35514112-35786699	-	-	24.5937	0	53.596	OK	20.2992	0	46.6763	OK	21.1796	0	45.4505	OK	20.2709	0	44.4274	OK
ENSG00000092036	-	-	ENSG00000092036	HAUS4	-	14:23398817-23451851	-	-	12.9262	3.30662	22.5458	OK	5.05042	0	11.1645	OK	6.83176	1.09367	12.5698	OK	6.46618	1.10236	11.83	OK
ENSG00000092051	-	-	ENSG00000092051	JPH4	-	14:23980968-24048009	-	-	0	0	0	OK	0.041231	0	0.411426	OK	0	0	0	OK	0.010841	0	0.357129	OK
ENSG00000092054	-	-	ENSG00000092054	MYH7	-	14:23881946-23904927	-	-	0	0	0	OK	0	0	0	OK	0	0	0	OK	0	0	0	OK
ENSG00000092067	-	-	ENSG00000092067	CEBPE	-	14:23586512-23588825	-	-	0	0	0	OK	0	0	0	OK	0	0	0	OK	0	0	0	OK
ENSG00000092068	-	-	ENSG00000092068	SLC7A8	-	14:23594503-23652883	-	-	0.693357	0	2.36002	OK	1.19892	0	3.13873	OK	0.741545	0	2.30824	OK	0.874446	0	2.387	OK
ENSG00000092094	-	-	ENSG00000092094	OSGEP	-	14:20914569-20923264	-	-	16.3274	8.13106	24.5237	OK	8.78528	1.95511	15.6154	OK	10.4531	4.22765	16.6786	OK	10.8266	5.56922	16.0839	OK
ENSG00000092096	-	-	ENSG00000092096	SLC22A17	-	14:23815514-23822121	-	-	0.274579	0	1.55888	OK	0.125882	0	1.4144	OK	0.795995	0	2.42843	OK	0.563701	0	2.02914	OK
ENSG00000092098	-	-	ENSG00000092098	RNF31	-	14:24612573-24636611	-	-	8.80194	0.942315	16.6616	OK	9.63115	0.671904	18.5904	OK	15.1952	0	30.4092	OK	12.4301	1.7118	23.1484	OK
ENSG00000092108	-	-	ENSG00000092108	SCFD1	-	14:31091317-31291908	-	-	38.9127	24.4687	53.3566	OK	39.809	22.2872	57.3308	OK	41.2098	26.0613	56.3582	OK	38.7307	22.7463	54.715	OK
ENSG00000092140	-	-	ENSG00000092140	G2E3	-	14:30907197-31089269	-	-	4.24312	0.468589	8.01765	OK	6.31007	0.920112	11.7	OK	8.14174	0	18.0532	OK	4.11133	0.692103	7.53055	OK
ENSG00000092148	-	-	ENSG00000092148	HECTD1	-	14:31569317-31677010	-	-	31.1521	15.9074	46.3967	OK	37.042	15.0076	59.0764	OK	34.6484	16.1597	53.137	OK	38.8342	16.2886	61.3797	OK
ENSG00000092199	-	-	ENSG00000092199	HNRNPC	-	14:21677294-21737653	-	-	207.937	148.546	267.329	OK	242.684	168.312	317.056	OK	221.533	157.226	285.841	OK	202.499	138.874	266.125	OK
ENSG00000092200	-	-	ENSG00000092200	RPGRIP1	-	14:21756097-21819460	-	-	0.0425096	0	1.8417	OK	0.348141	0	1.88745	OK	0	0	0	OK	0.0340498	0	1.5566	OK
ENSG00000092201	-	-	ENSG00000092201	SUPT16H	-	14:21819630-21852425	-	-	20.6312	13.5672	27.6952	OK	17.6343	11.1171	24.1515	OK	18.3831	12.0937	24.6726	OK	15.6067	9.57082	21.6426	OK
ENSG00000092203	-	-	ENSG00000092203	TOX4	-	14:21927178-21979517	-	-	17.0924	9.66874	24.5161	OK	15.8744	8.83156	22.9173	OK	19.712	9.49596	29.928	OK	13.2872	7.18824	19.3862	OK
ENSG00000092208	-	-	ENSG00000092208	GEMIN2	-	14:39583426-39606177	-	-	4.58816	1.3819	7.79443	OK	4.31176	1.5131	7.11042	OK	3.78277	1.05313	6.51242	OK	5.24381	2.14913	8.33849	OK
ENSG00000092295	-	-	ENSG00000092295	TGM1	-	14:24718319-24733638	-	-	0	0	0	OK	0.326702	0	2.60563	OK	0.292346	0	2.30622	OK	0.137728	0	1.94954	OK
ENSG00000092330	-	-	ENSG00000092330	TINF2	-	14:24708848-24711880	-	-	14.7512	7.17766	22.3247	OK	13.4359	7.21891	19.6529	OK	13.653	7.86307	19.443	OK	16.0434	8.98679	23.1	OK
ENSG00000092345	-	-	ENSG00000092345	DAZL	-	3:16628298-16711813	-	-	0	0	0	OK	0	0	0	OK	0	0	0	OK	0	0	0	OK
ENSG00000092377	-	-	ENSG00000092377	TBL1Y	-	Y:6778726-6959724	-	-	0	0	0	OK	0	0	0	OK	0	0	0	OK	0	0	0	OK
ENSG00000092421	-	-	ENSG00000092421	SEMA6A	-	5:115779311-115927094	-	-	3.24907	0	8.05443	OK	1.30639	0	3.66042	OK	1.13525	0	3.67401	OK	0.739272	0	2.73941	OK
ENSG00000092439	-	-	ENSG00000092439	TRPM7	-	15:50844669-50979012	-	-	4.56488	1.29651	7.83324	OK	3.82256	1.63896	6.00615	OK	4.19621	1.41452	6.9779	OK	3.81454	0.888337	6.74074	OK
ENSG00000092445	-	-	ENSG00000092445	TYRO3	-	15:41849872-41871536	-	-	4.16702	1.51043	6.82362	OK	2.58558	0.148329	5.02283	OK	3.01742	0.691467	5.34338	OK	2.62087	0.107975	5.13377	OK
ENSG00000092470	-	-	ENSG00000092470	WDR76	-	15:44119160-44160617	-	-	4.84138	2.68635	6.99641	OK	3.50529	1.91801	5.09258	OK	2.64481	1.37895	3.91068	OK	1.92264	1.05942	2.78586	OK
ENSG00000092529	-	-	ENSG00000092529	CAPN3	-	15:42500610-42704516	-	-	0.588473	0	3.29154	OK	1.27483	0	4.51749	OK	0.668384	0	3.31687	OK	0.818655	0	3.24526	OK
ENSG00000092531	-	-	ENSG00000092531	SNAP23	-	15:42783430-42841000	-	-	59.312	39.6474	78.9767	OK	60.5374	40.6452	80.4295	OK	65.3737	44.7251	86.0224	OK	58.9616	40.1183	77.8049	OK
ENSG00000092607	-	-	ENSG00000092607	TBX15	-	1:119425668-119532179	-	-	0	0	0	OK	0	0	0	OK	0	0	0	OK	0	0	0	OK
ENSG00000092621	-	-	ENSG00000092621	PHGDH	-	1:120202420-120286838	-	-	13.958	8.5944	19.3216	OK	10.9838	7.29177	14.6759	OK	18.4646	12.8017	24.1276	OK	23.1976	16.8752	29.5199	OK
[truncated: 61,655 more rows]

## Sheet: DEG
Expression Table of Differentially expressed genes (DEG) at 0, 1, 4, 12 hour
Chromosome	Start	End	EnsemblGeneID	HGNCsymbol	Strand	GeneBiotype	Hour0FPKM	Hour1FPKM	Hour4FPKM	Hour12FPKM	CLASS
11	47269851	47290396	ENSG00000025434	NR1H3	1	protein_coding	3.61763	1.22661	1.94589	2.15252	G1
1	17066768	17299474	ENSG00000058453	CROCC	1	protein_coding	6.46844	1.95425	4.17411	4.20303	G1
17	37329709	37353956	ENSG00000067191	CACNB1	-1	protein_coding	4.07677	1.16027	2.02049	1.70745	G1
X	54946895	54957864	ENSG00000067445	TRO	1	protein_coding	4.08996	0.568496	0.752987	2.07611	G1
X	131503345	131623996	ENSG00000076770	MBNL3	-1	protein_coding	2.69216	0.174558	0.259303	0.381633	G1
19	42772689	42799949	ENSG00000079432	CIC	1	protein_coding	12.7972	6.13204	12.7204	13.5839	G1
8	87497059	87573726	ENSG00000085719	CPNE3	1	protein_coding	31.9767	15.2575	24.2651	17.7292	G1
20	31350191	31397162	ENSG00000088305	DNMT3B	1	protein_coding	2.00868	0.808167	1.18543	1.12069	G1
7	105080108	105162714	ENSG00000091127	PUS7	-1	protein_coding	35.9832	7.98084	18.7782	7.60569	G1
17	73823306	73840798	ENSG00000092929	UNC13D	-1	protein_coding	2.92918	0.493903	2.06671	1.15462	G1
10	97071528	97321171	ENSG00000095637	SORBS1	-1	protein_coding	2.27033	0.581619	1.55585	0.481117	G1
22	35796056	35821423	ENSG00000100297	MCM5	1	protein_coding	17.0064	8.43281	10.1905	8.70916	G1
14	23456110	23479375	ENSG00000100802	C14orf93	-1	protein_coding	3.53244	0.740181	0.891767	1.15289	G1
20	37554955	37581703	ENSG00000101447	FAM83D	1	protein_coding	13.7655	6.28862	12.0678	7.59122	G1
8	144635377	144645232	ENSG00000104518	GSDMD	1	protein_coding	20.5986	8.87241	20.9121	24.1417	G1
16	87730091	87799598	ENSG00000104731	KLHDC4	-1	protein_coding	11.2513	5.47466	14.253	7.74791	G1
19	7459999	7537363	ENSG00000104880	ARHGEF18	1	protein_coding	9.01203	3.84116	5.99913	6.50052	G1
7	2577511	2595361	ENSG00000106009	BRAT1	-1	protein_coding	4.20795	1.35479	3.07948	3.51838	G1
7	150382785	150390729	ENSG00000106560	GIMAP2	1	protein_coding	20.1026	8.31881	10.8832	12.7159	G1
4	57036361	57194791	ENSG00000109265	KIAA1211	1	protein_coding	13.3633	1.79638	4.90029	2.88877	G1
4	6271576	6304992	ENSG00000109501	WFS1	1	protein_coding	28.6815	12.7151	17.558	17.108	G1
11	67259239	67273734	ENSG00000110697	PITPNM1	-1	protein_coding	6.91839	1.41464	7.46256	6.52453	G1
3	20081515	20195896	ENSG00000114166	KAT2B	1	protein_coding	7.27118	2.65219	2.75899	3.00138	G1
1	145438469	145442635	ENSG00000117289	TXNIP	1	protein_coding	6.06675	1.4754	3.21195	6.66715	G1
1	33360195	33367039	ENSG00000121900	TMEM54	-1	protein_coding	8.16662	3.338	5.22598	4.63248	G1
6	42712219	42714558	ENSG00000124659	TBCC	-1	protein_coding	9.12816	4.31538	6.89251	10.5901	G1
19	50162826	50169132	ENSG00000126456	IRF3	-1	protein_coding	8.96129	3.68599	6.85917	7.84125	G1
9	139776364	139821059	ENSG00000127191	TRAF2	1	protein_coding	8.90835	1.31142	4.19874	3.89174	G1
2	220114433	220142892	ENSG00000127824	TUBA4A	-1	protein_coding	1.78589	0.203493	0.731911	0.562929	G1
5	137774706	137782658	ENSG00000132563	REEP2	1	protein_coding	6.80614	1.85481	2.74696	2.57487	G1
7	150322463	150329473	ENSG00000133561	GIMAP6	-1	protein_coding	23.1658	10.7655	17.3847	21.0753	G1
15	57884106	58006943	ENSG00000137878	GCOM1	1	protein_coding	5.50216	0.746093	5.06163	10.385	G1
2	27667238	27712656	ENSG00000138002	IFT172	-1	protein_coding	7.44956	3.21488	5.64538	6.02429	G1
12	122242086	122270562	ENSG00000139718	SETD1B	1	protein_coding	2.06789	0.839193	2.33371	1.70707	G1
15	40731920	40760441	ENSG00000140320	BAHD1	1	protein_coding	4.26008	2.12222	3.75766	2.85756	G1
15	75639296	75647592	ENSG00000140398	NEIL1	1	protein_coding	5.9869	1.80568	4.8456	5.85994	G1
17	79848666	79858867	ENSG00000141552	ANAPC11	1	protein_coding	19.1771	5.67886	12.8637	11.398	G1
1	151336778	151345209	ENSG00000143416	SELENBP1	-1	protein_coding	4.53973	1.31232	1.95388	2.67136	G1
8	144656955	144660819	ENSG00000147813	NAPRT1	-1	protein_coding	4.12947	1.2616	3.91946	3.09013	G1
11	10326227	10328944	ENSG00000148926	ADM	1	protein_coding	18.2819	8.35535	20.6237	20.2286	G1
11	47185848	47198676	ENSG00000149182	ARFGAP2	-1	protein_coding	18.8751	8.54382	15.0672	13.801	G1
14	24759804	24769039	ENSG00000157379	DHRS1	-1	protein_coding	11.9164	5.47867	5.48401	11.2136	G1
16	2479395	2508855	ENSG00000162063	CCNF	1	protein_coding	5.10028	1.87874	5.3415	3.05027	G1
11	62104920	62160882	ENSG00000162174	ASRGL1	1	protein_coding	13.6671	5.60279	9.18781	9.04812	G1
2	220094479	220101391	ENSG00000163516	ANKZF1	1	protein_coding	10.96	4.71294	9.95465	9.91086	G1
5	79407050	79551898	ENSG00000164300	SERINC5	-1	protein_coding	2.58184	0.726238	1.09478	1.36778	G1
X	134654584	134716435	ENSG00000165359	DDX26B	1	protein_coding	4.77686	2.30947	3.29132	4.42277	G1
7	100060982	100076902	ENSG00000166925	TSC22D4	-1	protein_coding	11.2425	4.64969	6.78023	12.8465	G1
19	51300961	51308186	ENSG00000167747	C19orf48	-1	protein_coding	8.81795	3.02564	5.18552	5.85703	G1
X	1522032	1572655	ENSG00000169093	ASMTL	-1	protein_coding	7.24188	3.39444	6.13062	6.05382	G1
7	150147718	150176480	ENSG00000171115	GIMAP8	1	protein_coding	34.7315	17.361	17.536	27.7103	G1
17	79008948	79091232	ENSG00000175866	BAIAP2	1	protein_coding	11.8227	5.28872	7.15909	9.05711	G1
9	140069236	140082989	ENSG00000176248	ANAPC2	-1	protein_coding	7.60388	3.18544	5.85426	4.40183	G1
19	43979106	44009087	ENSG00000176531	PHLDB3	-1	protein_coding	3.61754	0.945629	1.21036	1.39834	G1
5	178286954	178315123	ENSG00000178338	ZNF354B	1	protein_coding	4.34041	1.94265	3.20307	2.47429	G1
7	150211918	150218161	ENSG00000179144	GIMAP7	1	protein_coding	17.7955	5.26962	9.6161	15.8284	G1
X	192989	220023	ENSG00000182378	PLCXD1	1	protein_coding	3.88983	1.0579	1.06156	2.38381	G1
14	55880259	55923444	ENSG00000182521	TBPL2	-1	protein_coding	2.14589	0	0.980914	0.701223	G1
11	115039938	115375675	ENSG00000182985	CADM1	-1	protein_coding	1.83837	0.484803	0.591951	0.800237	G1
8	145539954	145550573	ENSG00000185000	DGAT1	-1	protein_coding	17.3943	6.04847	11.1768	10.6943	G1
12	51317255	51326300	ENSG00000185432	METTL7A	1	protein_coding	4.25595	1.70232	2.36129	1.74105	G1
11	72287185	72385635	ENSG00000186642	PDE2A	-1	protein_coding	7.54148	3.06587	7.29182	7.52043	G1
17	260118	273510	ENSG00000187624	C17orf97	1	protein_coding	5.95743	2.46268	3.02811	3.20123	G1
6	49518113	49529620	ENSG00000197261	C6orf141	1	protein_coding	17.5586	3.89503	5.5479	6.34919	G1
14	77564440	77583630	ENSG00000198894	CIPC	1	protein_coding	3.28149	1.58203	2.69995	2.66969	G1
3	15491640	15563258	ENSG00000206561	COLQ	-1	protein_coding	2.54165	0.15161	0.821018	1.4157	G1
12	122233173	122241812	ENSG00000212694		-1	lincRNA	16.9429	8.42704	14.4825	15.2647	G1
6	12514342	12515006	ENSG00000212802	RPL15P3	1	pseudogene	23.2964	9.14594	16.5628	13.3548	G1
7	150413645	150421372	ENSG00000213203	GIMAP1	1	protein_coding	10.2453	2.45236	3.03355	5.73479	G1
16	28996147	29002104	ENSG00000213658	LAT	1	protein_coding	3.09851	0.31661	2.31667	1.88419	G1
5	473351	480999	ENSG00000225138		1	processed_transcript	2.04779	0.279714	1.83439	0.865018	G1
15	84867600	84898888	ENSG00000225151	GOLGA2P7	-1	pseudogene	2.03232	0.773612	1.32033	1.43219	G1
2	98280680	98319527	ENSG00000228486	LINC01125	1	antisense	2.89255	1.3692	1.53004	2.59453	G1
7	66800963	66805011	ENSG00000235475		1	lincRNA	2.53489	0	0	0.379084	G1
17	73584139	73622929	ENSG00000266714	MYO15B	1	protein_coding	3.06777	0.64934	1.33856	4.24899	G1
4	119199864	119200978	ENSG00000269893	SNHG8	1	lincRNA	34.963	13.9014	19.1456	17.6125	G1
9	139615818	139622636	ENSG00000233016	SNHG7	-1	antisense	114.823	45.2599	52.6512	49.5329	G1
19	14491313	14519537	ENSG00000123146	CD97	1	protein_coding	10.5866	3.46578	5.34409	2.5288	G1
3	52937588	53080766	ENSG00000163935	SFMBT1	-1	protein_coding	4.10346	0.616355	2.98186	0.356738	G1
1	156495197	156542396	ENSG00000183856	IQGAP3	-1	protein_coding	3.65528	2.15434	3.20284	1.75945	G1
7	99756867	99766373	ENSG00000197093	GAL3ST4	-1	protein_coding	5.06698	1.99507	2.9021	1.57646	G1
1	23755056	23811061	ENSG00000088280	ASAP3	-1	protein_coding	9.74118	3.49195	3.88517	2.6571	G2
10	8095567	8117161	ENSG00000107485	GATA3	1	protein_coding	26.7754	9.97638	8.70903	9.9864	G2
2	225243415	225266802	ENSG00000124019	FAM124B	-1	protein_coding	42.6967	14.6098	10.98	14.7579	G2
2	99613724	99771427	ENSG00000135951	TSGA10	-1	protein_coding	2.14461	0.327886	0.131179	0.0757289	G2
13	52951305	52980629	ENSG00000136114	THSD1	-1	protein_coding	10.4317	4.22982	3.24579	5.61017	G2
7	89796904	89867451	ENSG00000157214	STEAP2	1	protein_coding	2.59084	0.420575	0.159058	0.200468	G2
5	1599035	1634120	ENSG00000188002		-1	pseudogene	5.03878	0.23678	0.308129	0.0751274	G2
14	24867992	24888494	ENSG00000205978	NYNRIN	1	protein_coding	4.8168	2.22036	1.60957	2.85582	G2
7	102389418	102449672	ENSG00000222011	FAM185A	1	protein_coding	2.86953	0.761912	0.337625	0.847141	G2
7	30893010	30965131	ENSG00000240583	AQP1	1	protein_coding	9.93169	4.68142	2.69215	2.71014	G2
17	76153484	76155216	ENSG00000267679	EIF5AP2	1	pseudogene	5.51011	2.0306	1.27552	1.75285	G2
4	153457416	153460415	ENSG00000268471	MIR4453	1	lincRNA	145.74	1.23652	0.896835	1.09358	G2
7	86974997	87029111	ENSG00000005469	CROT	1	protein_coding	6.68425	6.22596	1.91768	2.05976	G2
7	139723544	139763521	ENSG00000059378	PARP12	-1	protein_coding	28.3187	16.992	13.4987	17.1594	G2
3	196769431	197026171	ENSG00000075711	DLG1	-1	protein_coding	51.06	27.5045	15.4553	25.9238	G2
11	76571911	76737841	ENSG00000078124	ACER3	1	protein_coding	11.2728	10.4743	5.58657	6.7701	G2
6	12290596	12297427	ENSG00000078401	EDN1	1	protein_coding	229.59	126.453	82.786	118.815	G2
X	107068985	107170423	ENSG00000080561	MID2	1	protein_coding	5.81303	3.59541	2.0699	2.63323	G2
1	211499957	211548288	ENSG00000082512	TRAF5	1	protein_coding	6.62005	5.09586	3.25461	4.00681	G2
18	6729717	6915715	ENSG00000088756	ARHGAP28	1	protein_coding	5.20063	3.53209	1.3639	1.67141	G2
20	44563267	44576662	ENSG00000100982	PCIF1	1	protein_coding	7.00291	3.50386	2.2314	4.49467	G2
20	25433341	25566153	ENSG00000101004	NINL	-1	protein_coding	8.08534	6.09296	2.81147	4.19506	G2
20	30598245	30619984	ENSG00000101331	CCM2L	1	protein_coding	5.45858	2.92934	1.94583	4.56225	G2
18	51795774	51847636	ENSG00000101751	POLI	1	protein_coding	11.4377	10.2445	5.11748	6.85294	G2
16	57290004	57318599	ENSG00000102934	PLLP	-1	protein_coding	6.15061	4.04312	1.39966	1.97095	G2
16	765115	769655	ENSG00000103260	METRN	1	protein_coding	3.17283	1.3624	0.549502	3.86711	G2
7	89874488	89940377	ENSG00000105792	C7orf63	1	protein_coding	2.49857	1.48692	0.334352	0.66061	G2
9	124964856	124991905	ENSG00000106852	LHX6	-1	protein_coding	10.3953	9.35134	3.06611	4.22548	G2
17	67410839	67539472	ENSG00000108984	MAP2K6	1	protein_coding	5.89523	3.80419	1.74458	3.77073	G2
6	106959730	107018326	ENSG00000112297	AIM1	1	protein_coding	10.7154	9.19201	2.85826	3.68944	G2
2	75185619	75197255	ENSG00000115350	POLE4	1	protein_coding	9.16761	6.05036	3.64474	6.22825	G2
2	62900986	63273622	ENSG00000115504	EHBP1	1	protein_coding	13.7928	6.4835	3.40121	3.95012	G2
2	86066267	86116137	ENSG00000115525	ST3GAL5	-1	protein_coding	15.316	13.6276	6.74459	8.62844	G2
1	68150744	68154021	ENSG00000116717	GADD45A	1	protein_coding	45.519	22.9725	20.3725	23.8453	G2
1	89518002	89531043	ENSG00000117228	GBP1	-1	protein_coding	2.97982	1.97837	0.943044	2.63163	G2
1	26856252	26901521	ENSG00000117676	RPS6KA1	1	protein_coding	4.27218	1.78948	1.27354	2.42556	G2
6	76001575	76203454	ENSG00000118407	FILIP1	-1	protein_coding	2.15115	1.80883	0.234794	0.746075	G2
3	172223298	172241297	ENSG00000121858	TNFSF10	-1	protein_coding	32.204	28.7922	11.1231	14.1933	G2
7	12726481	12730559	ENSG00000122644	ARL4A	1	protein_coding	10.8705	6.59972	3.97766	3.44182	G2
16	67977377	68003504	ENSG00000124067	SLC12A4	-1	protein_coding	22.8445	17.8727	8.76493	13.3805	G2
20	42543504	42698256	ENSG00000124191	TOX2	1	protein_coding	34.0628	24.0543	15.0682	14.9509	G2
14	54416454	54425479	ENSG00000125378	BMP4	-1	protein_coding	100.058	54.5705	29.0842	53.6246	G2
17	73201754	73231853	ENSG00000125450	NUP85	1	protein_coding	16.6141	11.8352	7.24264	16.4916	G2
11	17809595	18034709	ENSG00000129158	SERGEF	-1	protein_coding	8.04906	5.78998	1.33766	3.33769	G2
6	170151718	170181680	ENSG00000130023	ERMARD	1	protein_coding	18.7041	10.9212	8.85775	13.0121	G2
5	156822542	157002783	ENSG00000135074	ADAM19	-1	protein_coding	6.5541	5.40168	3.26717	4.92478	G2
9	100437191	100459639	ENSG00000136936	XPA	-1	protein_coding	9.34601	5.74278	3.94997	4.08958	G2
6	18368779	18469105	ENSG00000137393	RNF144B	1	protein_coding	21.538	14.6107	8.34489	14.6471	G2
14	26912299	27066960	ENSG00000139910	NOVA1	-1	protein_coding	7.02705	4.3174	3.08513	3.52362	G2
14	51955818	52197445	ENSG00000139926	FRMD6	1	protein_coding	36.6941	36.0814	16.383	17.4528	G2
19	8645126	8675620	ENSG00000142303	ADAMTS10	-1	protein_coding	2.94781	1.6999	0.635004	1.12048	G2
1	151104161	151119104	ENSG00000143434	SEMA6C	-1	protein_coding	9.43121	5.26693	2.82882	5.3674	G2
1	228106357	228135599	ENSG00000143816	WNT9A	-1	protein_coding	5.29722	4.35554	1.74966	2.67852	G2
1	204042243	204096863	ENSG00000143842	SOX13	1	protein_coding	6.748	4.11944	3.05107	2.81236	G2
3	111451344	111695364	ENSG00000144824	PHLDB2	1	protein_coding	40.6025	37.9022	19.5869	20.6993	G2
6	5261277	5771813	ENSG00000145982	FARS2	1	protein_coding	7.71138	5.13508	3.2543	5.53321	G2
5	136953189	137071779	ENSG00000146021	KLHL3	-1	protein_coding	2.6847	1.69628	0.738692	1.08967	G2
6	134309835	134373774	ENSG00000146411	SLC2A12	-1	protein_coding	1.95357	1.68894	0.497386	0.579523	G2
9	14081842	14398982	ENSG00000147862	NFIB	-1	protein_coding	74.6283	86.1471	34.4793	40.5609	G2
9	116148597	116163613	ENSG00000148218	ALAD	-1	protein_coding	9.42343	4.78401	4.41392	6.39327	G2
10	92671853	92681033	ENSG00000148677	ANKRD1	-1	protein_coding	305.496	395.495	95.8073	236.258	G2
2	7057523	7208417	ENSG00000151692	RNF144A	1	protein_coding	8.16386	6.35423	1.71732	2.33301	G2
5	35617946	35814713	ENSG00000152582	SPEF2	1	protein_coding	3.55578	1.54481	0.374641	0.437882	G2
3	33318517	33445154	ENSG00000153558	FBXL2	1	protein_coding	12.4347	10.9385	5.04795	6.60995	G2
4	186506598	186877806	ENSG00000154556	SORBS2	-1	protein_coding	45.4195	54.5792	18.7231	31.3182	G2
20	24986868	25039616	ENSG00000154930	ACSS1	-1	protein_coding	3.54173	2.55434	1.32964	4.3823	G2
1	20008706	20126438	ENSG00000162542	TMCO4	-1	protein_coding	2.59888	2.18261	0.531878	1.31671	G2
1	3406484	3528059	ENSG00000162591	MEGF6	-1	protein_coding	4.64008	2.82685	1.63075	1.83338	G2
1	61330931	61928465	ENSG00000162599	NFIA	1	protein_coding	17.9917	20.7161	6.54581	12.8226	G2
1	40974413	40982228	ENSG00000164002	EXO5	1	protein_coding	3.84142	2.39844	1.30482	2.31207	G2
6	147525561	147706866	ENSG00000164506	STXBP5	1	protein_coding	6.61257	8.62848	2.52119	4.34628	G2
8	81540686	81787016	ENSG00000164684	ZNF704	-1	protein_coding	4.4493	0.962454	0.770436	1.34489	G2
7	150688083	150711676	ENSG00000164867	NOS3	1	protein_coding	15.4137	7.08944	5.22342	7.65242	G2
8	94870035	94938294	ENSG00000164951	PDP1	1	protein_coding	20.8892	17.5369	8.39291	12.0378	G2
9	125871779	126030855	ENSG00000165209	STRBP	-1	protein_coding	9.85088	6.52784	4.66687	4.88206	G2
2	192699028	192711981	ENSG00000168497	SDPR	-1	protein_coding	96.5994	90.9609	36.736	43.2928	G2
8	127564687	127570638	ENSG00000168672	FAM84B	-1	protein_coding	23.1791	25.0272	7.65744	12.7315	G2
3	39850405	40301812	ENSG00000170011	MYRIP	1	protein_coding	3.84426	3.2381	1.73731	2.40275	G2
5	73923234	73937249	ENSG00000171617	ENC1	-1	protein_coding	14.3668	11.8653	4.34253	8.09451	G2
8	8993765	9009084	ENSG00000173281	PPP1R3B	-1	protein_coding	24.6095	18.7948	6.48637	8.3971	G2
11	45670427	45687172	ENSG00000175264	CHST1	-1	protein_coding	32.0404	30.6064	11.6953	24.574	G2
10	35927177	35930362	ENSG00000177283	FZD8	-1	protein_coding	6.83585	3.48704	2.43979	1.84568	G2
8	145051321	145086940	ENSG00000178685	PARP10	-1	protein_coding	3.51133	2.30032	0.983529	2.80103	G2
15	45803334	45878488	ENSG00000179362	HMGN2P46	1	pseudogene	2.61885	0.92766	0.0657876	0.228426	G2
1	231154704	231175992	ENSG00000182118	FAM89A	-1	protein_coding	16.7802	15.1448	6.48884	10.257	G2
22	19510547	19515068	ENSG00000184113	CLDN5	-1	protein_coding	27.1261	18.0164	11.3151	12.4635	G2
X	23851470	23926057	ENSG00000184831	APOO	-1	protein_coding	34.9682	28.5672	8.92052	24.2089	G2
14	105403581	105444694	ENSG00000185567	AHNAK2	-1	protein_coding	15.4319	11.2688	7.51067	7.63054	G2
9	79034752	79122332	ENSG00000187210	GCNT1	1	protein_coding	9.37305	5.25283	2.8498	2.3911	G2
15	75249560	75313837	ENSG00000198794	SCAMP5	1	protein_coding	2.11303	1.18435	0.510688	1.01032	G2
X	133677367	133680741	ENSG00000223749	MIR503HG	-1	lincRNA	39.9605	20.4584	6.40031	16.8591	G2
10	4692377	4720346	ENSG00000231298	LINC00704	-1	lincRNA	18.3949	13.33	8.51082	11.9719	G2
8	52730143	52730969	ENSG00000232941		1	protein_coding	70.9732	66.3228	33.9063	62.243	G2
9	35909480	35911683	ENSG00000235387	LINC00961	1	lincRNA	4.17586	5.49043	1.84041	2.46387	G2
6	32811913	32827362	ENSG00000240065	PSMB9	1	protein_coding	3.05509	0.943641	0.127366	1.88166	G2
4	56230138	56262014	ENSG00000249700	SRD5A3-AS1	-1	processed_transcript	2.71569	1.23126	0.849932	1.30958	G2
8	128806779	129113499	ENSG00000249859	PVT1	1	processed_transcript	25.2586	24.4401	11.8314	15.6486	G2
11	122026130	122293579	ENSG00000255090		-1	processed_transcript	34.5674	23.1437	0	0.281176	G2
11	121899063	121987031	ENSG00000255248		-1	sense_overlapping	5.02082	4.6746	1.80779	2.15194	G2
11	20595732	20596496	ENSG00000255291		1	pseudogene	2.31101	2.38394	0	0.314075	G2
1	150541449	150541745	ENSG00000264584	RN7SL600P	-1	misc_RNA	7.97698	2.17592	0	2.40548	G2
18	9315192	9334439	ENSG00000264964		-1	lincRNA	3.46546	0.847684	0	1.23763	G2
17	67547499	67550002	ENSG00000267194		1	lincRNA	2.28989	1.27758	0.555921	1.37786	G2
18	33296334	33297942	ENSG00000267397		1	lincRNA	1.8859	1.34876	0.619627	1.83365	G2
19	11432832	11434871	ENSG00000267576		1	sense_intronic	22.8401	16.0169	9.41664	16.3029	G2
16	70695570	70699739	ENSG00000268927		1	protein_coding	3.70994	2.01853	1.62877	1.97932	G2
5	10654332	10657928	ENSG00000272016		1	lincRNA	2.17779	1.41879	0.967261	1.25625	G2
1	12227060	12269285	ENSG00000028137	TNFRSF1B	1	protein_coding	6.68902	5.08771	3.41877	3.15305	G2
5	115779312	115910630	ENSG00000092421	SEMA6A	-1	protein_coding	3.24907	1.30639	1.13525	0.739272	G2
14	51324609	51411454	ENSG00000100504	PYGL	-1	protein_coding	16.9905	8.79307	9.21782	7.15561	G2
15	79213400	79241916	ENSG00000103811	CTSH	-1	protein_coding	2.66521	1.72185	1.02454	0.868129	G2
10	97803151	97820627	ENSG00000107443	CCNJ	1	protein_coding	15.7211	8.64485	8.84454	7.745	G2
12	31079362	31149534	ENSG00000110900	TSPAN11	1	protein_coding	1.88693	1.17116	0.746312	0.582203	G2
22	31089769	31303811	ENSG00000184792	OSBP2	1	protein_coding	3.72032	2.50025	1.96788	1.70283	G2
MT	5587	5655	ENSG00000210127	MT-TA	-1	Mt_tRNA	439309	935013	175328	142156	G3
18	47087069	47119272	ENSG00000101670	LIPG	1	protein_coding	25.3022	26.5397	12.2915	10.1354	G3
7	29161890	29553944	ENSG00000106069	CHN2	1	protein_coding	4.40472	3.41082	1.88878	1.30685	G3
10	54074056	54077802	ENSG00000107984	DKK1	1	protein_coding	24.9215	41.4144	7.7782	4.43787	G3
2	120770581	120936695	ENSG00000115109	EPB41L5	1	protein_coding	5.40562	4.13046	2.47739	2.20085	G3
2	102681004	102796334	ENSG00000115594	IL1R1	1	protein_coding	2.78108	2.44419	0.933341	0.575215	G3
9	5450503	5470566	ENSG00000120217	CD274	1	protein_coding	8.83201	12.0975	4.06437	4.49569	G3
15	57668165	57842925	ENSG00000128849	CGNL1	1	protein_coding	10.9613	9.16849	3.55249	3.19689	G3
6	78171948	78173490	ENSG00000135312	HTR1B	-1	protein_coding	16.1359	12.3506	7.16467	4.60332	G3
9	6215805	6257983	ENSG00000137033	IL33	1	protein_coding	9.37981	11.877	1.73211	0.86401	G3
4	123747863	123819391	ENSG00000138685	FGF2	1	protein_coding	4.13819	3.81056	1.80563	1.68593	G3
12	9102640	9163356	ENSG00000139187	KLRG1	1	protein_coding	4.04458	2.62365	0.931397	0.550443	G3
3	157154578	157161417	ENSG00000163661	PTX3	1	protein_coding	61.7103	64.6654	26.6151	12.3653	G3
11	7534529	7678358	ENSG00000166387	PPFIBP2	1	protein_coding	8.54889	5.29514	3.3335	0.814004	G3
1	211744910	211752084	ENSG00000170385	SLC30A1	-1	protein_coding	11.3597	16.4881	5.5363	5.22061	G3
13	77454312	77460540	ENSG00000178695	KCTD12	-1	protein_coding	54.4911	49.8866	19.0319	17.6048	G3
17	55938604	56032684	ENSG00000180891	CUEDC1	-1	protein_coding	9.7016	5.72729	3.90725	3.14192	G3
14	85996488	86095034	ENSG00000185070	FLRT2	1	protein_coding	85.1718	100.007	38.4899	19.4976	G3
15	96869167	96883492	ENSG00000185551	NR2F2	1	protein_coding	73.4932	61.8893	30.6735	21.8124	G3
MT	5657	5729	ENSG00000210135	MT-TN	-1	Mt_tRNA	105973	196068	35967.6	44716.3	G3
MT	5761	5826	ENSG00000210140	MT-TC	-1	Mt_tRNA	94191.8	171833	38694.8	44871.3	G3
6	3905144	3912213	ENSG00000260604		-1	lincRNA	2.12005	2.85489	1.03509	0.899227	G3
X	99928327	99928978	ENSG00000261295		1	antisense	33.6302	35.6039	16.4079	16.8481	G3
2	188328957	188430487	ENSG00000003436	TFPI	-1	protein_coding	201.328	195.611	135.442	75.3265	G3
7	11409984	11871824	ENSG00000005108	THSD7A	-1	protein_coding	7.13897	9.84392	4.8086	2.78138	G3
3	170136653	170578169	ENSG00000013297	CLDN11	1	protein_coding	140.742	157.134	98.0823	52.4397	G3
12	13043716	13070871	ENSG00000013588	GPRC5A	1	protein_coding	4.84056	6.48272	4.78403	1.60457	G3
14	89591215	90085493	ENSG00000053254	FOXN3	-1	protein_coding	16.1559	10.6882	8.75258	5.69489	G3
3	98514785	98620533	ENSG00000057019	DCBLD2	-1	protein_coding	29.2857	37.7105	15.0649	8.75951	G3
12	27058114	27091259	ENSG00000064102	ASUN	-1	protein_coding	15.4193	13.7702	7.87738	6.79237	G3
10	13203554	13253104	ENSG00000065328	MCM10	1	protein_coding	3.10242	2.25239	2.12473	0.864206	G3
2	12857015	12882860	ENSG00000071575	TRIB2	1	protein_coding	8.88346	13.0849	7.86272	3.55375	G3
3	127317066	127341276	ENSG00000073111	MCM2	1	protein_coding	8.54774	3.64449	3.99225	2.46651	G3
22	50528308	50600119	ENSG00000073146	MOV10L1	1	protein_coding	6.13974	4.55458	3.01498	2.1777	G3
19	5993175	6199583	ENSG00000087903	RFX2	-1	protein_coding	8.73475	5.33548	3.94982	2.4828	G3
15	44119161	44160617	ENSG00000092470	WDR76	1	protein_coding	4.84138	3.50529	2.64481	1.92264	G3
17	38443885	38459171	ENSG00000094804	CDC6	1	protein_coding	8.2771	5.85138	10.111	3.77683	G3
22	35776354	35790207	ENSG00000100292	HMOX1	1	protein_coding	21.5977	20.5072	23.8928	10.6767	G3
20	42295754	42345136	ENSG00000101057	MYBL2	1	protein_coding	15.4622	11.9705	11.8433	7.16184	G3
20	3767578	3786762	ENSG00000101224	CDC25B	1	protein_coding	33.276	22.6568	24.2232	13.8238	G3
X	15482369	15574652	ENSG00000102010	BMX	1	protein_coding	50.1764	51.2956	45.1592	19.7773	G3
16	69598997	69738569	ENSG00000102908	NFAT5	1	protein_coding	13.6469	9.39158	8.75855	5.37237	G3
15	29991571	30261068	ENSG00000104067	TJP1	-1	protein_coding	86.0203	54.9353	44.8207	37.273	G3
9	82186688	82341658	ENSG00000106829	TLE4	1	protein_coding	19.5868	23.7405	11.386	8.61722	G3
4	17812525	17846485	ENSG00000109805	NCAPG	1	protein_coding	16.9301	17.7271	13.1603	8.0102	G3
6	11712287	11807279	ENSG00000111863	ADTRP	-1	protein_coding	5.37995	7.00177	4.28898	2.39985	G3
6	142622991	142767403	ENSG00000112414	GPR126	1	protein_coding	33.3009	41.1672	24.4373	9.96364	G3
6	85397069	85474237	ENSG00000112837	TBX18	-1	protein_coding	6.98283	7.74175	4.07034	2.81299	G3
3	71003844	71633140	ENSG00000114861	FOXP1	-1	protein_coding	35.808	29.9719	26.459	17.3761	G3
2	102927962	102968497	ENSG00000115602	IL1RL1	1	protein_coding	29.0468	37.601	20.7114	6.997	G3
1	178694300	178889238	ENSG00000116191	RALGPS2	1	protein_coding	14.2417	12.0504	9.42698	5.59219	G3
1	24829387	24867530	ENSG00000117602	RCAN3	1	protein_coding	1.7417	1.29547	0.703432	0.357417	G3
10	96305547	96373662	ENSG00000119969	HELLS	1	protein_coding	6.45457	6.44143	4.57411	3.13395	G3
12	26490342	26986131	ENSG00000123104	ITPR2	-1	protein_coding	15.1233	13.2335	8.73254	4.27452	G3
13	95672083	95953687	ENSG00000125257	ABCC4	-1	protein_coding	4.54275	5.76437	4.18547	1.90075	G3
4	169418217	169849608	ENSG00000129116	PALLD	1	protein_coding	9.2855	9.67677	7.23557	4.60451	G3
13	27131840	27263085	ENSG00000132970	WASF3	1	protein_coding	8.86481	7.15601	4.83785	3.889	G3
13	37005967	37017019	ENSG00000133101	CCNA1	1	protein_coding	14.048	13.44	11.1803	5.43263	G3
13	34392186	34540695	ENSG00000133119	RFC3	1	protein_coding	7.36627	6.23369	6.01238	3.03888	G3
12	46751972	46766650	ENSG00000134294	SLC38A2	-1	protein_coding	123.484	164.755	107.508	57.6075	G3
2	225629807	225907162	ENSG00000135905	DOCK10	-1	protein_coding	12.6245	10.7458	17.1027	4.74998	G3
2	25600067	25896503	ENSG00000138101	DTNB	-1	protein_coding	8.26788	8.84531	6.19044	3.48854	G3
1	26496362	26498551	ENSG00000142684	ZNF593	1	protein_coding	5.47522	4.84996	6.51557	2.45524	G3
4	128802016	128820350	ENSG00000142731	PLK4	1	protein_coding	5.74567	3.92809	4.0493	2.60822	G3
1	84543745	84704181	ENSG00000142875	PRKACB	1	protein_coding	21.0108	22.0807	12.2904	10.2704	G3
1	212113741	212208884	ENSG00000143493	INTS7	-1	protein_coding	5.82146	4.17105	4.35336	2.90593	G3
3	99357319	99518070	ENSG00000144810	COL8A1	1	protein_coding	95.0392	101.115	73.029	42.4046	G3
4	120133742	120216672	ENSG00000145390	USP53	1	protein_coding	12.3956	16.7089	7.65267	5.93145	G3
X	152082986	152142024	ENSG00000147394	ZNF185	1	protein_coding	10.7937	9.54941	6.70421	4.1225	G3
10	129894923	129924649	ENSG00000148773	MKI67	-1	protein_coding	23.1874	15.7049	16.0232	11.0529	G3
11	77032752	77185680	ENSG00000149269	PAK1	-1	protein_coding	14.5513	6.34583	10.7144	4.39649	G3
2	133402426	133429152	ENSG00000150551	LYPD1	-1	protein_coding	21.7478	23.7995	16.9544	9.60581	G3
18	43563502	43652238	ENSG00000152229	PSTPIP2	-1	protein_coding	3.82729	2.41385	2.0064	1.58549	G3
3	170779128	171178197	ENSG00000154310	TNIK	-1	protein_coding	11.3857	10.7194	6.6718	4.52892	G3
8	31496902	32622548	ENSG00000157168	NRG1	1	protein_coding	8.41483	9.67399	6.12726	4.09171	G3
1	54691105	54879152	ENSG00000157216	SSBP3	-1	protein_coding	49.0782	36.9743	32.1774	22.5665	G3
21	36160098	37376965	ENSG00000159216	RUNX1	-1	protein_coding	5.82562	7.3549	2.73691	2.07323	G3
8	145654165	145669827	ENSG00000160949	TONSL	-1	protein_coding	1.9113	1.17291	1.16442	0.922765	G3
1	20808884	20812713	ENSG00000162545	CAMK2N1	-1	protein_coding	15.4592	16.0777	10.2032	7.10977	G3
1	78444859	78483648	ENSG00000162616	DNAJB4	1	protein_coding	74.5433	68.7846	43.419	32.9769	G3
3	44803209	44914868	ENSG00000163808	KIF15	1	protein_coding	2.93364	1.83931	2.4435	1.36597	G3
4	145567173	145666423	ENSG00000164161	HHIP	1	protein_coding	476.411	524.067	272.953	197.003	G3
7	89783689	89794143	ENSG00000164647	STEAP1	1	protein_coding	10.9949	8.43562	5.48717	4.30653	G3
9	75515578	75695358	ENSG00000165092	ALDH1A1	-1	protein_coding	16.1279	16.2609	13.5449	7.44768	G3
9	36572859	36677678	ENSG00000165304	MELK	1	protein_coding	11.4996	7.68604	9.412	5.00654	G3
15	55903744	56035288	ENSG00000166450	PRTG	-1	protein_coding	4.21938	1.9596	2.1878	1.41733	G3
19	41725108	41767671	ENSG00000167601	AXL	1	protein_coding	21.465	20.9221	17.3749	10.4827	G3
12	52562780	52585784	ENSG00000167767	KRT80	-1	protein_coding	5.19555	5.08738	3.25385	2.59348	G3
17	73034958	73043080	ENSG00000167863	ATP5H	-1	protein_coding	103.213	111.19	52.2914	34.6037	G3
17	7758383	7759417	ENSG00000167874	TMEM88	1	protein_coding	28.1698	18.4585	17.6649	10.9709	G3
4	99391518	99579780	ENSG00000168785	TSPAN5	-1	protein_coding	65.6173	73.1987	45.4101	23.2381	G3
22	28144265	28197486	ENSG00000169184	MN1	-1	protein_coding	1.88208	2.13213	0.82851	0.375979	G3
1	52373628	52456436	ENSG00000169213	RAB3B	-1	protein_coding	5.14871	5.16758	3.27835	2.12165	G3
2	145141648	145282147	ENSG00000169554	ZEB2	-1	protein_coding	7.57903	9.05385	5.35982	3.06472	G3
17	39679869	39684560	ENSG00000171345	KRT19	-1	protein_coding	26.5855	21.1949	14.1771	12.948	G3
5	40679600	40693837	ENSG00000171522	PTGER4	1	protein_coding	6.4837	3.42402	1.829	1.0704	G3
2	10262455	10271545	ENSG00000171848	RRM2	1	protein_coding	52.15	44.3179	46.5976	26.0061	G3
4	70586880	70653679	ENSG00000173597	SULT1B1	-1	protein_coding	25.9025	25.4798	18.7204	10.8565	G3
5	94039446	94620279	ENSG00000175471	MCTP1	-1	protein_coding	19.8863	30.7986	17.5703	8.79292	G3
5	92919043	92930321	ENSG00000175745	NR2F1	1	protein_coding	16.3975	19.8779	9.34608	6.42288	G3
4	114821440	114900883	ENSG00000180801	ARSJ	-1	protein_coding	8.34043	14.2238	7.19399	3.97845	G3
4	169277886	169458937	ENSG00000181381	DDX60L	-1	protein_coding	15.9122	8.80661	6.49839	5.03356	G3
6	42924083	42924503	ENSG00000181524	RPL24P4	-1	pseudogene	14.7041	14.1714	6.77807	6.09429	G3
12	7842378	7848372	ENSG00000184344	GDF3	-1	protein_coding	6.71511	3.6012	3.72533	2.51705	G3
5	106712590	107006596	ENSG00000184349	EFNA5	-1	protein_coding	3.66407	3.06044	1.86392	1.02421	G3
1	50905150	51425935	ENSG00000185104	FAF1	-1	protein_coding	8.75766	5.53947	5.73746	4.26482	G3
10	83635070	84746935	ENSG00000185737	NRG3	1	protein_coding	2.43239	3.43677	2.31608	1.06711	G3
1	162794248	162838605	ENSG00000185860	C1orf110	-1	protein_coding	5.4884	7.89453	3.91341	1.48693	G3
10	71561644	71724031	ENSG00000197467	COL13A1	1	protein_coding	15.8829	14.6402	12.8953	6.97038	G3
15	32907345	32932150	ENSG00000198826	ARHGAP11A	1	protein_coding	6.62513	5.79545	6.75959	2.66911	G3
8	59717977	60031767	ENSG00000198846	TOX	-1	protein_coding	3.0688	3.59163	2.53578	1.10026	G3
10	50362773	50396630	ENSG00000204161	C10orf128	-1	protein_coding	10.0359	14.9881	5.73825	2.57217	G3
14	73086004	73360809	ENSG00000205683	DPF3	-1	protein_coding	2.51106	3.28265	0.993601	0.566049	G3
15	95819690	95870358	ENSG00000248441		-1	lincRNA	12.3147	10.7006	6.85169	3.7308	G3
12	76653619	76698911	ENSG00000257219		1	lincRNA	15.6768	14.5966	10.9516	6.25727	G3
17	45331212	45421658	ENSG00000259207	ITGB3	1	protein_coding	15.1273	14.1808	11.5599	6.26142	G3
22	26917949	26921002	ENSG00000260065		-1	lincRNA	2.19898	1.06941	1.2119	0.749591	G3
16	69736968	69738555	ENSG00000260772		1	3prime_overlapping_ncrna	117.965	123.963	62.4733	46.658	G3
8	32623643	32625477	ENSG00000272327		1	lincRNA	5.60813	10.3114	4.31825	2.06655	G3
1	169691781	169733846	ENSG00000007908	SELE	-1	protein_coding	1.53966	25.0468	8.44102	1.09853	G4
11	102188215	102210134	ENSG00000023445	BIRC3	1	protein_coding	1.44173	11.2781	2.00911	0.45415	G4
6	1610681	1614127	ENSG00000054598	FOXC1	1	protein_coding	7.34646	22.6089	7.01956	8.43107	G4
9	123664671	123691451	ENSG00000056558	TRAF1	-1	protein_coding	0.531193	3.608	1.49362	0.423926	G4
1	186640923	186649559	ENSG00000073756	PTGS2	-1	protein_coding	2.40526	137.566	17.7855	2.29224	G4
2	28615315	28640179	ENSG00000075426	FOSL2	1	protein_coding	9.2028	31.0178	13.3166	8.53364	G4
4	74962752	74965010	ENSG00000081041	CXCL2	-1	protein_coding	4.54674	107.442	3.64668	2.51847	G4
4	187508937	187647876	ENSG00000083857	FAT1	-1	protein_coding	2.27166	8.16416	2.12166	1.53331	G4
19	49375649	49379314	ENSG00000087074	PPP1R15A	1	protein_coding	14.5245	30.8076	15.3739	12.7137	G4
10	69644427	69678147	ENSG00000096717	SIRT1	1	protein_coding	4.70158	10.167	6.42365	5.57229	G4
14	35870717	35873955	ENSG00000100906	NFKBIA	-1	protein_coding	13.8339	59.5327	15.3641	15.9017	G4
16	86544133	86548076	ENSG00000103241	FOXF1	1	protein_coding	2.91918	8.16613	3.36568	2.05604	G4
8	90769975	90803291	ENSG00000104312	RIPK2	1	protein_coding	12.8481	26.6431	13.731	10.5854	G4
7	100770370	100782547	ENSG00000106366	SERPINE1	1	protein_coding	367.447	848.351	708.487	293.9	G4
10	30722866	30750762	ENSG00000107968	MAP3K8	1	protein_coding	1.71425	19.6238	5.5669	3.15054	G4
17	32582304	32584222	ENSG00000108691	CCL2	1	protein_coding	179.4	1046.6	125.622	93.6181	G4
6	11183531	11382581	ENSG00000111859	NEDD9	-1	protein_coding	9.12841	39.6652	18.5551	14.6055	G4
5	173315283	173388979	ENSG00000113742	CPEB4	1	protein_coding	2.4692	10.5086	5.42782	4.73579	G4
3	187439165	187463515	ENSG00000113916	BCL6	-1	protein_coding	1.80294	16.1728	4.27868	2.43797	G4
2	113531492	113542167	ENSG00000115008	IL1A	-1	protein_coding	2.08544	10.1552	0.616405	0.423545	G4
2	228678558	228682272	ENSG00000115009	CCL20	1	protein_coding	0.994057	23.6862	2.09196	0.1561	G4
2	151324709	151395525	ENSG00000115963	RND3	-1	protein_coding	42.7713	142.587	41.4964	26.1372	G4
2	178092323	178257425	ENSG00000116044	NFE2L2	-1	protein_coding	20.741	43.1962	31.9561	26.743	G4
1	192778169	192781403	ENSG00000116741	RGS2	1	protein_coding	2.34655	11.6523	4.042	3.19761	G4
1	94994781	95007356	ENSG00000117525	F3	-1	protein_coding	0.967119	44.581	12.3181	3.31117	G4
1	214156524	214214595	ENSG00000117707	PROX1	1	protein_coding	0.502273	6.35802	1.50978	0.64095	G4
2	207938861	208031991	ENSG00000118263	KLF7	-1	protein_coding	10.6067	28.7489	10.429	10.9941	G4
6	138188351	138204449	ENSG00000118503	TNFAIP3	1	protein_coding	3.37905	25.1555	8.40642	3.5962	G4
6	134490384	134639250	ENSG00000118515	SGK1	-1	protein_coding	33.5756	78.1411	26.7523	13.4177	G4
9	102584137	102629173	ENSG00000119508	NR4A3	1	protein_coding	0.116721	25.6157	1.33076	0.613475	G4
5	137801179	137805004	ENSG00000120738	EGR1	1	protein_coding	3.25988	51.9678	14.619	8.60107	G4
7	41724712	41742706	ENSG00000122641	INHBA	-1	protein_coding	2.72843	6.02605	1.64789	3.86817	G4
10	75668935	75677255	ENSG00000122861	PLAU	1	protein_coding	8.74178	27.96	14.9157	14.1532	G4
10	64571756	64679660	ENSG00000122877	EGR2	-1	protein_coding	0.133363	19.6448	1.1877	0.483615	G4
12	52416616	52453291	ENSG00000123358	NR4A1	1	protein_coding	0.895672	91.1373	11.9309	3.24436	G4
17	68164814	68176189	ENSG00000123700	KCNJ2	1	protein_coding	3.51027	34.2061	12.0938	11.2875	G4
20	43953928	43977064	ENSG00000124145	SDC4	-1	protein_coding	9.17643	27.0221	12.3047	8.66745	G4
20	48599536	48605423	ENSG00000124216	SNAI1	1	protein_coding	3.05699	7.628	3.36789	4.34969	G4
19	45971253	45978437	ENSG00000125740	FOSB	1	protein_coding	0.609292	15.8075	0.607348	0.397624	G4
20	6748311	6760927	ENSG00000125845	BMP2	1	protein_coding	3.22733	48.5765	13.3085	13.5321	G4
20	30193086	30194318	ENSG00000125968	ID1	1	protein_coding	7.19982	16.2867	5.21447	7.88216	G4
19	16435628	16438685	ENSG00000127528	KLF2	1	protein_coding	15.3269	44.8864	27.5025	21.8539	G4
19	39897453	39900052	ENSG00000128016	ZFP36	1	protein_coding	5.1115	154.727	17.6338	20.5754	G4
10	129705325	129884119	ENSG00000132334	PTPRE	1	protein_coding	14.2718	29.799	16.0469	16.7412	G4
3	5020801	5027008	ENSG00000134107	BHLHE40	1	protein_coding	12.7872	82.973	30.6343	11.7666	G4
12	69201956	69239214	ENSG00000135679	MDM2	1	protein_coding	173.726	435.298	182.349	156.392	G4
12	105196331	105352522	ENSG00000136052	SLC41A2	-1	protein_coding	2.30138	6.24358	3.89325	3.05315	G4
7	22765503	22771621	ENSG00000136244	IL6	1	protein_coding	3.05059	17.1881	3.31806	1.33458	G4
9	110247133	110252763	ENSG00000136826	KLF4	-1	protein_coding	0.49022	2.30001	1.02829	0.269938	G4
6	37137979	37143202	ENSG00000137193	PIM1	1	protein_coding	4.8249	9.78289	6.21794	4.99825	G4
18	19749404	19782491	ENSG00000141448	GATA6	1	protein_coding	2.87805	6.06593	2.95535	2.52601	G4
21	44834395	44847008	ENSG00000142178	SIK1	-1	protein_coding	1.96335	17.2443	1.95114	1.36856	G4
1	86046444	86049645	ENSG00000142871	CYR61	1	protein_coding	231.844	469.246	206.253	262.032	G4
1	120162045	120190396	ENSG00000143067	ZNF697	-1	protein_coding	8.70461	22.42	10.9418	6.9814	G4
1	150547032	150552066	ENSG00000143384	MCL1	-1	protein_coding	52.142	163.683	64.4958	53.7974	G4
1	221874766	221915518	ENSG00000143507	DUSP10	-1	protein_coding	0.968373	6.36145	2.58702	2.87681	G4
2	237476430	237491001	ENSG00000144476	ACKR3	1	protein_coding	13.1122	73.8011	29.1035	22.5313	G4
3	39183346	39196053	ENSG00000144655	CSRNP1	-1	protein_coding	2.17105	10.2641	3.37798	1.90869	G4
3	101546835	101579866	ENSG00000144802	NFKBIZ	1	protein_coding	4.46397	27.4223	1.77806	2.34017	G4
4	113195698	113207059	ENSG00000145365	TIFA	-1	protein_coding	4.7048	11.3327	4.13853	4.7	G4
5	67511548	67597649	ENSG00000145675	PIK3R1	1	protein_coding	4.61692	13.4208	7.11551	3.6735	G4
10	106071894	106098162	ENSG00000148841	ITPRIP	-1	protein_coding	3.14345	14.0721	6.53007	4.67003	G4
4	139936943	139966906	ENSG00000151014	CCRN4L	1	protein_coding	3.30664	20.8905	4.85884	3.80636	G4
10	59951278	60027694	ENSG00000151151	IPMK	-1	protein_coding	3.1944	9.53201	6.2374	4.12874	G4
2	157180944	157198860	ENSG00000153234	NR4A2	-1	protein_coding	0.171657	48.0092	2.82651	0.347742	G4
8	103661007	103668130	ENSG00000155090	KLF10	-1	protein_coding	6.89605	52.1623	7.88494	7.73884	G4
1	204372515	204380919	ENSG00000158615	PPP1R15B	-1	protein_coding	6.77474	15.0186	9.38764	7.27689	G4
19	13261229	13265722	ENSG00000160888	IER2	1	protein_coding	5.76551	15.2077	9.6783	9.74373	G4
1	212738676	212794119	ENSG00000162772	ATF3	1	protein_coding	1.32157	47.1467	3.67821	1.61286	G4
1	205271187	205290883	ENSG00000163545	NUAK2	-1	protein_coding	1.06957	9.07204	0.846124	1.01313	G4
3	156391024	156424559	ENSG00000163659	TIPARP	1	protein_coding	5.08239	10.3732	3.96462	2.82003	G4
4	74902306	74904524	ENSG00000163734	CXCL3	-1	protein_coding	1.42205	32.8248	1.45612	0.654835	G4
4	74735110	74736959	ENSG00000163739	CXCL1	1	protein_coding	13.7425	245.76	9.93028	5.22862	G4
1	37940153	37949980	ENSG00000163874	ZC3H12A	1	protein_coding	2.13714	9.00049	2.06767	0.803601	G4
6	139693393	139695757	ENSG00000164442	CITED2	-1	protein_coding	20.662	100.346	30.6802	32.0218	G4
8	80676245	80680098	ENSG00000164683	HEY1	-1	protein_coding	1.64775	13.9922	4.27101	3.76761	G4
16	66955582	66959547	ENSG00000166592	RRAD	-1	protein_coding	0	2.40327	0.317515	0.0867005	G4
11	102641234	102651359	ENSG00000166670	MMP10	-1	protein_coding	3.49094	12.2577	6.06318	5.74249	G4
19	1248552	1259142	ENSG00000167470	MIDN	1	protein_coding	14.3732	36.7035	23.958	18.1487	G4
19	36378555	36393205	ENSG00000167604	NFKBID	-1	protein_coding	2.33841	26.0189	1.87729	2.15446	G4
19	54663846	54676944	ENSG00000167608	TMC4	-1	protein_coding	0.367783	1.99868	0.42841	0.66924	G4
3	99548985	99833357	ENSG00000168386	FILIP1L	-1	protein_coding	23.1542	46.405	26.9076	27.0975	G4
4	74606223	74609433	ENSG00000169429	IL8	1	protein_coding	5.64878	138.486	12.6032	3.40805	G4
10	6186881	6277495	ENSG00000170525	PFKFB3	1	protein_coding	8.3386	28.4896	14.5039	8.25664	G4
18	67956137	67997436	ENSG00000170677	SOCS6	1	protein_coding	3.56406	8.34724	6.20174	3.83987	G4
7	32907784	32933743	ENSG00000170852	KBTBD2	-1	protein_coding	13.8455	28.0858	17.4721	14.9194	G4
19	12902310	12904124	ENSG00000171223	JUNB	1	protein_coding	2.53703	30.8813	7.68099	9.52133	G4
2	10182976	10194963	ENSG00000172059	KLF11	1	protein_coding	1.64852	5.48123	2.52475	1.8978	G4
12	49250928	49259681	ENSG00000172602	RND1	-1	protein_coding	1.83112	18.9416	4.38908	5.22458	G4
8	126442563	126450647	ENSG00000173334	TRIB1	1	protein_coding	4.65005	23.1926	8.14094	3.89657	G4
X	24001837	24045303	ENSG00000174010	KLHL15	-1	protein_coding	0.795984	1.80418	0.912288	0.98073	G4
11	65659520	65668044	ENSG00000175592	FOSL1	-1	protein_coding	34.0375	107.562	51.4566	31.8393	G4
3	182971032	183016292	ENSG00000176597	B3GNT5	1	protein_coding	12.72	25.7303	20.191	10.5809	G4
8	40010989	40012821	ENSG00000176907	C8orf4	1	protein_coding	18.2744	38.4668	13.3896	10.0938	G4
12	12878851	12982909	ENSG00000178878	APOLD1	1	protein_coding	5.96919	29.0315	5.77146	3.94709	G4
17	8043790	8059824	ENSG00000179094	PER1	-1	protein_coding	5.22603	26.5555	14.3162	4.38852	G4
8	22545172	22550815	ENSG00000179388	EGR3	-1	protein_coding	0.917697	68.7424	5.45842	1.30829	G4
18	72922710	73001905	ENSG00000179981	TSHZ1	1	protein_coding	4.72494	10.9016	4.43832	3.42958	G4
4	171502621	171526601	ENSG00000181359	HSP90AA6P	-1	pseudogene	0	4.00482	0.0384461	0	G4
9	117546915	117568406	ENSG00000181634	TNFSF15	-1	protein_coding	2.69069	19.5954	3.80684	1.00718	G4
17	54671060	54672951	ENSG00000183691	NOG	1	protein_coding	1.63026	8.32365	2.27683	1.16497	G4
22	38597889	38612518	ENSG00000185022	MAFF	1	protein_coding	15.3595	99.8757	36.5018	16.3249	G4
16	31885079	31928668	ENSG00000185947	ZNF267	1	protein_coding	6.93896	19.3639	8.46344	7.01102	G4
13	110406184	110438915	ENSG00000185950	IRS2	-1	protein_coding	1.00756	2.11655	1.36572	0.718442	G4
2	235401685	235405697	ENSG00000188042	ARL4C	-1	protein_coding	6.26403	17.4543	10.8134	7.12678	G4
3	150126122	150184218	ENSG00000196428	TSC22D2	1	protein_coding	16.7016	64.4128	18.3833	15.7109	G4
1	206136916	206155151	ENSG00000196550	FAM72A	1	protein_coding	0.113567	3.03666	0.877082	1.75342	G4
9	140194083	140196703	ENSG00000198435	NRARP	-1	protein_coding	24.2205	49.7212	21.0768	33.387	G4
10	21781587	21786191	ENSG00000204682	CASC10	-1	protein_coding	0.756658	1.97471	1.35161	1.0192	G4
8	81397854	81438500	ENSG00000205189	ZBTB10	1	protein_coding	2.44631	9.01221	3.72447	3.64229	G4
15	62455734	62457482	ENSG00000205502	C2CD4B	-1	protein_coding	19.0917	82.163	36.5461	24.7256	G4
MT	14674	14742	ENSG00000210194	MT-TE	-1	Mt_tRNA	130947	274481	66177.7	63496.7	G4
10	32735068	32863492	ENSG00000216937	CCDC7	1	protein_coding	0.309963	1.77302	0.742733	0.725146	G4
21	23582258	23793139	ENSG00000226043		1	lincRNA	0	2.95075	0.399755	0	G4
6	132453055	132490514	ENSG00000228495	LINC01013	1	lincRNA	30.3412	63.4601	15.3767	26.6223	G4
1	94784035	94790125	ENSG00000236098		-1	lincRNA	0	2.12448	0	0.122495	G4
7	65958693	65960461	ENSG00000237310		1	lincRNA	0	3.17689	0	1.34647	G4
5	124144521	124144926	ENSG00000242814		-1	pseudogene	0	2.36164	0.600184	0	G4
8	67833919	67838633	ENSG00000245910	SNHG6	-1	processed_transcript	82.1028	179.992	110.552	120.934	G4
11	62619460	62623386	ENSG00000255717	SNHG1	-1	processed_transcript	26.2182	1875.78	42.4763	433.065	G4
12	69235068	69237017	ENSG00000257181		-1	antisense	78.6477	190.86	78.1567	58.5365	G4
14	103798011	103798704	ENSG00000259775		-1	antisense	0	2.36529	0.330624	1.06343	G4
12	52452243	52453287	ENSG00000259884		-1	lincRNA	1.51689	168.663	22.7132	5.31859	G4
7	69001035	69001303	ENSG00000266210	RN7SL371P	-1	misc_RNA	0	5.27608	1.598	0.646585	G4
X	45604639	45629677	ENSG00000270069		-1	lincRNA	10.2276	36.5344	13.2871	8.54163	G4
4	113194124	113194472	ENSG00000272567		-1	lincRNA	0	6.74176	1.55955	1.04769	G4
MT	15888	15953	ENSG00000210195	MT-TT	1	Mt_tRNA	0	2146.04	0	5815.48	G4
7	139784546	139876835	ENSG00000006459	KDM7A	-1	protein_coding	1.53485	3.32331	4.69122	2.11016	G5
7	112063023	112121072	ENSG00000006652	IFRD1	1	protein_coding	9.84399	25.1589	26.2789	16.4731	G5
2	201717732	201729422	ENSG00000013441	CLK1	-1	protein_coding	24.3459	57.8326	44.2397	39.9149	G5
12	88886570	88974628	ENSG00000049130	KITLG	-1	protein_coding	7.92742	49.4398	40.486	24.2002	G5
16	56965960	56977798	ENSG00000051108	HERPUD1	1	protein_coding	37.8845	206.532	244.49	49.3276	G5
2	70124820	70170077	ENSG00000059728	MXD1	1	protein_coding	2.53607	7.53584	6.10334	2.75818	G5
19	45250962	45263301	ENSG00000069399	BCL3	1	protein_coding	5.17788	13.2151	11.4402	11.1587	G5
7	107220422	107269615	ENSG00000075790	BCAP29	1	protein_coding	87.6912	331.96	274.291	229.354	G5
12	109176466	109251366	ENSG00000084112	SSH1	-1	protein_coding	6.24299	22.8575	17.27	12.113	G5
19	10381511	10397291	ENSG00000090339	ICAM1	1	protein_coding	12.0433	50.0178	50.4072	12.0514	G5
10	35415719	35501886	ENSG00000095794	CREM	1	protein_coding	12.3315	39.9505	27.6367	18.2805	G5
22	29190543	29196585	ENSG00000100219	XBP1	-1	protein_coding	24.6138	49.6192	57.6478	33.2799	G5
16	87863629	87903094	ENSG00000103257	SLC7A5	-1	protein_coding	1.94852	5.20445	11.5682	2.46008	G5
19	45504688	45541452	ENSG00000104856	RELB	1	protein_coding	3.81795	11.8043	12.419	7.13963	G5
7	20370325	20455377	ENSG00000105855	ITGB8	1	protein_coding	1.07159	2.36064	2.1438	0.775636	G5
12	6747241	6756626	ENSG00000111644	ACRBP	-1	protein_coding	0.225808	1.74895	1.25955	1.03543	G5
6	126102307	126252266	ENSG00000111912	NCOA7	1	protein_coding	14.572	33.1862	31.5479	19.6737	G5
6	160090089	160183561	ENSG00000112096	SOD2	-1	protein_coding	29.4112	63.1259	83.3209	48.8051	G5
6	43737921	43754224	ENSG00000112715	VEGFA	1	protein_coding	3.54436	12.1145	8.6996	3.63535	G5
5	139712428	139726216	ENSG00000113070	HBEGF	-1	protein_coding	4.71877	34.9519	19.7139	9.24189	G5
5	172741716	172756506	ENSG00000113739	STC2	-1	protein_coding	1.78508	4.48368	4.55898	2.24818	G5
1	231468480	231473598	ENSG00000116903	EXOC8	-1	protein_coding	1.83617	4.26155	3.67689	2.61743	G5
1	157090983	157108266	ENSG00000117036	ETV3	-1	protein_coding	3.73482	8.11972	5.93984	5.46858	G5
1	169433147	169455241	ENSG00000117479	SLC19A2	-1	protein_coding	1.93023	3.97226	3.34792	2.85053	G5
1	210001352	210030910	ENSG00000117597	DIEXF	1	protein_coding	1.94165	4.1852	3.64239	2.69769	G5
5	95220802	95297775	ENSG00000118985	ELL2	-1	protein_coding	4.54387	16.7346	15.6359	8.08713	G5
9	72999503	73029540	ENSG00000119138	KLF9	-1	protein_coding	3.24605	11.5303	7.76437	4.53327	G5
5	172195093	172198198	ENSG00000120129	DUSP1	-1	protein_coding	5.93366	43.1081	21.8327	12.9519	G5
13	41506056	41635576	ENSG00000120690	ELF1	-1	protein_coding	14.5732	33.8875	30.4185	16.9697	G5
4	2626988	2734292	ENSG00000125386	FAM193A	1	protein_coding	6.59119	18.4611	14.1965	11.9378	G5
7	108210012	108215294	ENSG00000128590	DNAJB9	1	protein_coding	10.0014	56.9433	91.9974	12.3531	G5
17	7743222	7758114	ENSG00000132510	KDM6B	1	protein_coding	1.76573	19.5351	10.2307	2.45847	G5
3	10206549	10285427	ENSG00000134070	IRAK2	1	protein_coding	1.46362	3.04806	3.03736	1.48673	G5
7	22157856	22396763	ENSG00000136237	RAPGEF5	-1	protein_coding	6.74065	16.6454	19.5483	13.1731	G5
1	221051699	221058401	ENSG00000136630	HLX	1	protein_coding	10.4741	67.4911	59.5676	70.829	G5
10	112257596	112271302	ENSG00000138166	DUSP5	1	protein_coding	2.86004	32.8747	16.058	8.31231	G5
18	57567180	57571538	ENSG00000141682	PMAIP1	1	protein_coding	8.63726	34.7912	21.6598	11.9071	G5
1	169074935	169101960	ENSG00000143153	ATP1B1	1	protein_coding	18.5039	39.7415	35.9755	32.4998	G5
1	183605220	183897665	ENSG00000143344	RGL1	1	protein_coding	11.7078	27.1868	37.9553	28.4486	G5
6	89790470	89794879	ENSG00000146278	PNRC1	1	protein_coding	34.0572	81.4722	65.1112	48.8116	G5
7	28338940	28865511	ENSG00000146592	CREB5	1	protein_coding	4.14949	12.7075	12.2801	3.53754	G5
7	45951949	45961473	ENSG00000146674	IGFBP3	-1	protein_coding	0.663727	9.88267	13.376	7.18782	G5
9	130830480	130871524	ENSG00000148339	SLC25A25	1	protein_coding	2.27983	10.1626	6.8375	3.87709	G5
11	109964087	110042566	ENSG00000149289	ZC3H12C	1	protein_coding	2.2995	7.93691	8.52061	4.9525	G5
6	154708638	154831793	ENSG00000153721	CNKSR3	-1	protein_coding	3.69176	14.918	23.8714	13.2256	G5
21	28208066	28217728	ENSG00000154734	ADAMTS1	-1	protein_coding	1.12544	10.1405	14.4316	10.0417	G5
8	97154562	97173020	ENSG00000156466	GDF6	-1	protein_coding	1.07751	2.37518	2.50188	1.14394	G5
21	35885440	35987441	ENSG00000159200	RCAN1	-1	protein_coding	7.65396	331.612	127.012	62.2514	G5
21	45642874	45660849	ENSG00000160223	ICOSLG	-1	protein_coding	0.815997	2.51681	2.39431	1.38946	G5
17	6926339	6933609	ENSG00000161940	BCL6B	1	protein_coding	54.1981	142.518	131.248	99.6462	G5
1	101185298	101204601	ENSG00000162692	VCAM1	1	protein_coding	0.878457	12.8425	47.5895	7.55713	G5
5	110831731	110848288	ENSG00000164211	STARD4	-1	protein_coding	24.1836	62.8518	81.516	33.1318	G5
8	104410863	104427417	ENSG00000164933	SLC25A32	-1	protein_coding	10.5724	23.6095	21.5348	14.7227	G5
9	94171327	94186144	ENSG00000165030	NFIL3	-1	protein_coding	3.64516	8.25141	8.03207	4.72574	G5
10	18948334	18970568	ENSG00000165997	ARL5B	1	protein_coding	6.61689	13.3926	20.3626	8.6053	G5
12	57482677	57489259	ENSG00000166886	NAB2	1	protein_coding	2.51677	19.7592	10.0385	6.19096	G5
19	40946751	40950612	ENSG00000167565	SERTAD3	-1	protein_coding	4.90328	12.4222	18.154	6.74212	G5
17	5389605	5394134	ENSG00000167842	MIS12	1	protein_coding	4.77195	15.1742	20.2031	6.14897	G5
20	52183604	52226446	ENSG00000171940	ZNF217	-1	protein_coding	5.87434	11.9982	10.5556	9.03752	G5
21	43406940	43430496	ENSG00000173276	ZBTB21	-1	protein_coding	2.19692	4.92954	4.9876	2.56442	G5
12	57910371	57914300	ENSG00000175197	DDIT3	-1	protein_coding	2.17738	13.4485	12.7877	1.78137	G5
11	18627948	18656338	ENSG00000179119	SPTY2D1	-1	protein_coding	3.54642	7.32982	6.81485	4.2583	G5
19	54369477	54379691	ENSG00000179820	MYADM	1	protein_coding	42.6612	112.48	108.702	72.7563	G5
3	150458914	150481264	ENSG00000181788	SIAH2	-1	protein_coding	6.11273	15.1585	20.942	11.9109	G5
15	51348795	51397473	ENSG00000183578	TNFAIP8L3	-1	protein_coding	9.81011	26.1046	20.5373	9.41812	G5
X	53111549	53117722	ENSG00000184205	TSPYL2	1	protein_coding	6.71542	18.0927	26.1735	11.6869	G5
1	110452864	110473614	ENSG00000184371	CSF1	1	protein_coding	5.12782	10.3053	9.83979	5.52955	G5
17	1614805	1620468	ENSG00000186594	MIR22HG	-1	lincRNA	16.9851	40.9744	33.9431	21.5594	G5
5	141689992	141706020	ENSG00000187678	SPRY4	-1	protein_coding	7.1798	43.3588	40.7863	36.9448	G5
1	38268616	38273857	ENSG00000196449	YRDC	-1	protein_coding	5.22866	13.277	9.94271	8.14169	G5
2	97202480	97218375	ENSG00000196843	ARID5A	1	protein_coding	7.63987	19.5663	18.38	15.0303	G5
17	79876146	79885590	ENSG00000197063	MAFG	-1	protein_coding	6.33431	14.0664	13.1067	9.97359	G5
7	1570350	1582679	ENSG00000198517	MAFK	1	protein_coding	2.37312	6.99682	4.82939	6.1524	G5
15	62359176	62363116	ENSG00000198535	C2CD4A	1	protein_coding	0	2.65633	1.22059	0.548778	G5
MT	9991	10058	ENSG00000210164	MT-TG	1	Mt_tRNA	0	14700	8295.33	3842.32	G5
17	7255208	7258258	ENSG00000213859	KCTD11	1	protein_coding	0.980162	4.24693	2.84357	3.59051	G5
10	36810649	36813162	ENSG00000229644	NAMPTL	-1	protein_coding	1.05553	2.77945	2.92678	1.99844	G5
7	130626519	130794935	ENSG00000231721	LINC-PINT	-1	antisense	0.0932851	1.99902	1.58007	1.29289	G5
19	54377880	54379303	ENSG00000232220		-1	antisense	42.8427	126.212	93.9111	81.91	G5
X	1515320	1518295	ENSG00000236871	LINC00106	1	lincRNA	0	3.7194	1.30002	2.51579	G5
1	40929991	40932436	ENSG00000260920		1	sense_overlapping	1.3889	5.1283	4.47469	2.15227	G5
11	118477155	118528741	ENSG00000019144	PHLDB1	1	protein_coding	15.5108	30.8378	38.9731	30.0533	G5
14	90421283	90511106	ENSG00000042088	TDP1	1	protein_coding	4.40299	7.04862	8.95275	6.12988	G5
2	219523487	219528166	ENSG00000074582	BCS1L	1	protein_coding	5.0682	10.6417	14.1565	8.55481	G5
2	234263153	234380750	ENSG00000077044	DGKD	1	protein_coding	1.86682	8.28878	8.04329	9.64596	G5
10	104153867	104162281	ENSG00000077150	NFKB2	1	protein_coding	5.16446	12.013	18.3119	8.5523	G5
3	182840001	182881627	ENSG00000078081	LAMP3	-1	protein_coding	2.68198	5.34097	7.77639	4.48307	G5
16	50775961	50835846	ENSG00000083799	CYLD	1	protein_coding	5.38737	9.32318	11.8621	6.97548	G5
19	47724081	47736023	ENSG00000105327	BBC3	-1	protein_coding	18.6352	33.8978	40.0923	29.1771	G5
7	30634297	30673649	ENSG00000106105	GARS	1	protein_coding	58.008	99.8285	124.613	90.1703	G5
9	135136743	135230372	ENSG00000107290	SETX	-1	protein_coding	12.7008	24.1407	29.8466	13.0948	G5
17	26662628	26674035	ENSG00000109079	TNFAIP1	1	protein_coding	18.5625	29.5248	37.2179	27.1026	G5
5	58264865	59817947	ENSG00000113448	PDE4D	-1	protein_coding	5.63463	11.8206	14.3672	8.17405	G5
12	26111962	26232825	ENSG00000123094	RASSF8	1	protein_coding	11.0181	18.5914	26.198	7.72728	G5
20	584441	591042	ENSG00000125878	TCF15	-1	protein_coding	4.27305	7.34584	9.21698	6.98656	G5
X	23801290	23804343	ENSG00000130066	SAT1	1	protein_coding	109.304	205.687	228.349	162.581	G5
6	149825869	149867174	ENSG00000131013	PPIL4	-1	protein_coding	11.8991	19.8455	24.2752	14.1327	G5
5	55230923	55290821	ENSG00000134352	IL6ST	-1	protein_coding	52.5741	95.2184	127.528	91.6931	G5
2	187454792	187545628	ENSG00000138448	ITGAV	1	protein_coding	41.7947	78.7209	86.6785	71.9305	G5
4	78078304	78354542	ENSG00000138764	CCNG2	1	protein_coding	11.3864	16.891	24.01	11.8448	G5
17	7076750	7082883	ENSG00000141505	ASGR1	-1	protein_coding	0.305143	1.57396	2.36686	1.96085	G5
10	61786056	62493248	ENSG00000151150	ANK3	-1	protein_coding	1.55605	3.30011	4.58597	1.98849	G5
10	320130	735683	ENSG00000151240	DIP2C	-1	protein_coding	1.21872	2.23464	3.19485	1.79173	G5
9	12775020	12822130	ENSG00000153714	LURAP1L	1	protein_coding	0.795171	2.64173	3.50395	1.93428	G5
21	42792231	42831141	ENSG00000157601	MX1	1	protein_coding	1.21282	2.91123	3.84022	2.9325	G5
X	15337573	15353676	ENSG00000165195	PIGA	-1	protein_coding	3.61195	6.42056	11.1686	2.22521	G5
18	61637159	61672278	ENSG00000166401	SERPINB8	1	protein_coding	10.2392	18.7358	22.0579	14.5749	G5
11	9481866	9550071	ENSG00000166478	ZNF143	1	protein_coding	3.42357	6.35335	7.75998	4.46605	G5
1	40420802	40435638	ENSG00000168389	MFSD2A	1	protein_coding	0.701046	2.6475	2.54589	1.02577	G5
8	22102617	22112113	ENSG00000168495	POLR3D	1	protein_coding	15.0671	24.4745	30.1586	20.9146	G5
20	43160426	43252888	ENSG00000168734	PKIG	1	protein_coding	64.483	98.9668	134.637	82.1403	G5
11	31391387	31453396	ENSG00000170946	DNAJC24	1	protein_coding	3.65918	7.89898	11.9114	8.21691	G5
3	169804520	169899537	ENSG00000173889	PHC3	-1	protein_coding	3.3434	8.58079	8.52474	6.34755	G5
5	89811428	89825401	ENSG00000176018	LYSMD3	-1	protein_coding	7.23843	14.2418	23.0241	9.72424	G5
18	48700920	48744674	ENSG00000176624	MEX3C	-1	protein_coding	20.0065	31.9305	42.7063	25.32	G5
X	3809479	3838787	ENSG00000205663		-1	lincRNA	0	1.37843	2.15716	0.550097	G5
7	77286977	77325582	ENSG00000214293	RSBN1L-AS1	-1	lincRNA	1.94643	7.03734	13.5647	3.61801	G5
7	72300004	72307909	ENSG00000225648	SBDSP1	1	pseudogene	3.15032	5.77322	8.07577	4.59067	G5
1	120693320	120697146	ENSG00000273131		-1	processed_transcript	3.84837	5.9799	7.80195	5.54843	G5
19	54949192	54949528	ENSG00000269873		-1	lincRNA	0	3.57747	2.80868	4.01116	G5
9	127997132	128003609	ENSG00000044574	HSPA5	-1	protein_coding	147.367	296.555	791.565	447.71	G6
8	134249414	134314265	ENSG00000104419	NDRG1	-1	protein_coding	19.912	55.8786	124.821	50.5508	G6
22	21996550	21998587	ENSG00000128228	SDF2L1	1	protein_coding	24.461	63.9004	154.837	55.587	G6
2	197059094	197458416	ENSG00000138411	HECW2	-1	protein_coding	12.4348	30.3514	57.5693	45.7137	G6
13	30083547	30169825	ENSG00000139514	SLC7A1	-1	protein_coding	5.94005	13.4403	26.9519	8.34547	G6
8	23699428	23712320	ENSG00000159167	STC1	-1	protein_coding	0.755621	9.11059	31.7088	13.9076	G6
3	64501333	64673676	ENSG00000163638	ADAMTS9	-1	protein_coding	20.8131	43.0708	92.0439	59.7108	G6
12	107385142	107487607	ENSG00000008405	CRY1	-1	protein_coding	13.9545	23.272	38.9712	21.4996	G6
6	143072604	143266338	ENSG00000010818	HIVEP2	-1	protein_coding	0.421879	2.2611	13.14	1.92965	G6
3	27414214	27525911	ENSG00000033867	SLC4A7	-1	protein_coding	12.3792	24.0036	37.5776	25.9776	G6
5	96496571	96518964	ENSG00000058729	RIOK2	-1	protein_coding	8.90176	13.5502	20.7407	14.6752	G6
4	156680144	156728743	ENSG00000061918	GUCY1B3	1	protein_coding	1.38973	1.36049	3.57768	1.16912	G6
X	152599613	152625568	ENSG00000063587	ZNF275	1	protein_coding	1.54811	2.51099	3.49906	2.87784	G6
5	127419458	127525380	ENSG00000064651	SLC12A2	1	protein_coding	27.6257	39.2029	90.118	38.7029	G6
2	74425689	74444692	ENSG00000065911	MTHFD2	1	protein_coding	10.5336	18.7099	55.807	17.1417	G6
6	126307576	126360422	ENSG00000066651	TRMT11	1	protein_coding	0.961045	1.7986	3.5246	1.72636	G6
10	1085848	1095110	ENSG00000067064	IDI1	-1	protein_coding	27.6808	42.7254	59.7017	37.3008	G6
5	54720682	54830878	ENSG00000067113	PPAP2A	-1	protein_coding	9.35658	7.66293	28.0627	16.4732	G6
15	100017370	100256671	ENSG00000068305	MEF2A	1	protein_coding	15.2082	22.7693	38.1747	21.3114	G6
X	48334541	48344752	ENSG00000068438	FTSJ1	1	protein_coding	17.353	20.4113	40.9929	25.8046	G6
12	89981828	90103077	ENSG00000070961	ATP2B1	-1	protein_coding	5.64016	8.67375	17.9877	8.71714	G6
14	81937893	82000205	ENSG00000071537	SEL1L	-1	protein_coding	18.1527	25.731	73.7597	33.2607	G6
17	5374571	5390131	ENSG00000072849	DERL2	-1	protein_coding	92.5341	100.893	214.276	97.9723	G6
4	40058446	40159872	ENSG00000078177	N4BP2	1	protein_coding	0.983509	1.27467	3.23921	1.23864	G6
1	100810584	100985833	ENSG00000079335	CDC14A	1	protein_coding	3.37512	5.37648	10.35	6.30503	G6
5	88013975	88199922	ENSG00000081189	MEF2C	-1	protein_coding	11.247	20.7611	74.2395	50.478	G6
1	40810522	40888998	ENSG00000084070	SMAP2	1	protein_coding	2.84029	3.38491	5.68301	3.04565	G6
9	33104080	33167354	ENSG00000086062	B4GALT1	-1	protein_coding	23.9282	29.52	51.22	30.6097	G6
1	236378855	236445319	ENSG00000086619	ERO1LB	-1	protein_coding	2.01997	1.72563	11.4245	3.23417	G6
13	111530887	111567416	ENSG00000088448	ANKRD10	-1	protein_coding	28.432	32.965	65.8749	51.5182	G6
7	107788068	108097161	ENSG00000091129	NRCAM	-1	protein_coding	28.7521	32.8861	62.0535	38.4759	G6
3	112051194	112081659	ENSG00000091972	CD200	1	protein_coding	4.1434	5.93595	15.096	7.74852	G6
22	43231418	43411151	ENSG00000100266	PACSIN2	-1	protein_coding	18.5582	17.5976	40.4657	20.6448	G6
14	61176246	61191066	ENSG00000100625	SIX4	-1	protein_coding	1.18901	2.33423	4.25238	2.38514	G6
20	53092136	53267710	ENSG00000101134	DOK5	1	protein_coding	1.93031	3.00162	9.63896	5.09395	G6
20	361261	378203	ENSG00000101255	TRIB3	1	protein_coding	2.62298	3.49486	10.5032	3.7438	G6
20	18488137	18542059	ENSG00000101310	SEC23B	1	protein_coding	10.6394	12.3048	31.2987	12.7899	G6
X	48770459	48776301	ENSG00000102096	PIM2	-1	protein_coding	1.19236	2.87497	5.79602	2.04114	G6
13	49550048	49783915	ENSG00000102531	FNDC3A	1	protein_coding	9.72945	9.45862	25.9732	10.9347	G6
13	96329393	96447243	ENSG00000102580	DNAJC3	1	protein_coding	17.0254	20.6062	74.5801	27.5551	G6
8	67624653	67774257	ENSG00000104205	SGK3	1	protein_coding	3.11689	4.21452	7.982	4.95923	G6
8	22224762	22291642	ENSG00000104635	SLC39A14	1	protein_coding	11.227	13.2341	67.7199	19.1959	G6
19	38397868	38699012	ENSG00000105738	SIPA1L3	1	protein_coding	3.7843	7.654	13.8778	8.95176	G6
7	92234235	92465908	ENSG00000105810	CDK6	-1	protein_coding	3.46166	4.02481	9.43639	4.40966	G6
7	30050203	30066300	ENSG00000106080	FKBP14	-1	protein_coding	7.47169	7.72632	16.0144	13.5248	G6
9	134452157	134615461	ENSG00000107263	RAPGEF1	-1	protein_coding	16.6273	17.8116	41.2701	32.3316	G6
4	39500375	39529931	ENSG00000109814	UGDH	-1	protein_coding	21.0801	28.1445	72.0601	24.6161	G6
11	3022152	3078843	ENSG00000110619	CARS	-1	protein_coding	8.46667	10.6234	18.0558	11.1662	G6
12	51454990	51477447	ENSG00000110925	CSRNP2	-1	protein_coding	5.6601	6.67936	11.8917	8.49287	G6
12	21654715	21671342	ENSG00000111711	GOLT1B	1	protein_coding	21.5056	32.4341	48.7457	30.985	G6
6	116575336	116762424	ENSG00000111817	DSE	1	protein_coding	4.45147	5.32876	16.4343	9.93204	G6
6	90636248	91006627	ENSG00000112182	BACH2	-1	protein_coding	0.464041	0.539347	2.0628	1.31037	G6
5	74664311	74807963	ENSG00000113163	COL4A3BP	-1	protein_coding	5.98126	7.16422	13.256	6.46595	G6
3	53918437	53926015	ENSG00000113811		-1	protein_coding	16.0251	30.0395	71.9969	23.9064	G6
3	81538850	81811312	ENSG00000114480	GBE1	-1	protein_coding	29.8253	31.8013	68.999	55.1161	G6
2	119981384	120023228	ENSG00000115107	STEAP3	1	protein_coding	3.91951	3.90607	9.98874	6.97782	G6
2	65215611	65250999	ENSG00000115902	SLC1A4	1	protein_coding	2.38336	3.46364	10.539	5.55222	G6
1	184659365	184724047	ENSG00000116406	EDEM3	-1	protein_coding	6.43921	11.022	20.003	12.0008	G6
1	65713902	65881552	ENSG00000116675	DNAJC6	1	protein_coding	0.590754	0.81335	2.32671	0.383724	G6
1	70876901	70905534	ENSG00000116761	CTH	1	protein_coding	1.85068	1.97683	6.55734	3.11289	G6
1	95362507	95392834	ENSG00000117519	CNN3	-1	protein_coding	117.509	149.324	275.481	192.624	G6
1	209959036	209979465	ENSG00000117595	IRF6	-1	protein_coding	0.48399	0.691089	1.89223	0.41805	G6
7	158523686	158622944	ENSG00000117868	ESYT2	-1	protein_coding	14.2278	16.4458	30.5916	20.372	G6
11	118528026	118550399	ENSG00000118094	TREH	-1	protein_coding	4.48424	5.68249	11.3089	9.64413	G6
4	88928820	88998929	ENSG00000118762	PKD2	1	protein_coding	6.00576	5.7057	13.3566	5.76448	G6
1	230972865	231005335	ENSG00000119280	C1orf198	-1	protein_coding	6.44432	7.83267	13.9995	11.232	G6
14	74111578	74170435	ENSG00000119661	DNAL1	1	protein_coding	3.95788	6.22384	9.92115	6.10871	G6
9	26840683	26892802	ENSG00000120159	CAAP1	-1	protein_coding	7.31474	8.06482	15.7841	8.57883	G6
4	147175127	147443123	ENSG00000120519	SLC10A7	-1	protein_coding	4.68034	6.78781	14.2002	5.99196	G6
3	150259781	150321015	ENSG00000120742	SERP1	-1	protein_coding	41.8181	48.5411	90.2763	66.099	G6
3	118930579	118959950	ENSG00000121578	B4GALT4	-1	protein_coding	1.45011	2.97168	4.62465	2.76022	G6
12	52463030	52471278	ENSG00000123395	C12orf44	1	protein_coding	22.7979	31.2817	46.1227	35.9805	G6
2	71336814	71357369	ENSG00000124370	MCEE	-1	protein_coding	3.61902	3.51891	9.69916	7.0945	G6
X	14891563	14940449	ENSG00000130150	MOSPD2	1	protein_coding	3.21624	4.99427	7.4392	4.17018	G6
11	69924408	70035634	ENSG00000131620	ANO1	1	protein_coding	0.401998	0.342758	3.71594	1.85667	G6
15	101811022	101817705	ENSG00000131871	VIMP	-1	protein_coding	21.3958	28.4525	60.7025	35.6762	G6
14	55308726	55369570	ENSG00000131979	GCH1	-1	protein_coding	1.84126	3.69747	10.4339	3.01175	G6
3	5229331	5261642	ENSG00000134109	EDEM1	1	protein_coding	13.4524	17.8243	46.5861	27.1414	G6
2	16080686	16087129	ENSG00000134323	MYCN	1	protein_coding	0.847469	0.45629	3.34045	2.29304	G6
13	103249353	103331521	ENSG00000134900	TPP2	1	protein_coding	20.0243	22.1188	43.123	20.2873	G6
11	128328656	128457453	ENSG00000134954	ETS1	-1	protein_coding	27.6923	47.3328	90.0621	68.9625	G6
5	114949205	114968689	ENSG00000134970	TMED7	-1	protein_coding	50.1366	69.6778	127.087	63.3882	G6
9	80912059	80945009	ENSG00000135069	PSAT1	1	protein_coding	14.5012	15.2581	41.7266	26.6682	G6
16	85061375	85127836	ENSG00000135709	KIAA0513	1	protein_coding	0.474642	1.14595	4.55449	1.29113	G6
1	184759858	184943682	ENSG00000135842	FAM129A	-1	protein_coding	0.423516	0.590753	3.17285	2.29029	G6
9	34989638	34998897	ENSG00000137094	DNAJB5	1	protein_coding	3.23368	4.06821	8.81857	2.80046	G6
11	110045605	110167447	ENSG00000137710	RDX	-1	protein_coding	159.848	199.941	326.107	214.228	G6
2	27353624	27357543	ENSG00000138073	PREB	-1	protein_coding	13.6703	13.3416	29.4727	18.983	G6
4	128982423	129144086	ENSG00000138709	LARP1B	1	protein_coding	4.82762	7.41754	13.1521	5.83662	G6
16	87439852	87525651	ENSG00000140948	ZCCHC14	-1	protein_coding	4.52722	8.2815	16.4004	8.70136	G6
21	34804792	34852318	ENSG00000142188	TMEM50B	-1	protein_coding	26.5669	35.6506	103.329	40.2356	G6
1	145524891	145543868	ENSG00000143127	ITGA10	1	protein_coding	4.276	5.05155	14.0364	11.064	G6
2	189156396	189460653	ENSG00000144366	GULP1	1	protein_coding	4.97795	7.36065	10.077	7.82293	G6
3	11597544	11762220	ENSG00000144560	VGLL4	-1	protein_coding	30.8446	50.2841	73.2224	55.1091	G6
2	219433303	219461803	ENSG00000144580	RQCD1	1	protein_coding	24.6228	37.0546	58.3439	42.5518	G6
3	51422478	51426828	ENSG00000145050	MANF	1	protein_coding	50.3078	74.7409	238.78	149.42	G6
4	103790135	103810399	ENSG00000145354	CISD2	1	protein_coding	6.1016	6.84772	12.9761	8.23855	G6
5	158584417	158637061	ENSG00000145860	RNF145	-1	protein_coding	29.4735	45.7562	74.5084	45.99	G6
7	138710452	138720775	ENSG00000146858	ZC3HAV1L	-1	protein_coding	1.64912	1.86675	5.04964	4.14561	G6
20	60963688	60982341	ENSG00000149679	CABLES2	-1	protein_coding	2.08082	2.64305	5.31471	2.35023	G6
4	177604689	177713881	ENSG00000150630	VEGFC	-1	protein_coding	3.84216	4.49505	8.40403	5.70606	G6
4	119643978	119759838	ENSG00000150961	SEC24D	-1	protein_coding	39.3152	36.5405	87.2614	49.0797	G6
3	151961617	152183569	ENSG00000152601	MBNL1	1	protein_coding	58.289	60.9271	149.621	93.3986	G6
2	33661391	33789817	ENSG00000152689	RASGRP3	1	protein_coding	10.2369	15.4328	38.7294	30.0601	G6
6	117996665	118031803	ENSG00000153989	NUS1	1	protein_coding	13.8861	18.0142	29.6301	15.6603	G6
17	65373575	65693372	ENSG00000154217	PITPNC1	1	protein_coding	9.46343	11.5838	19.6265	9.77114	G6
21	15743436	15755805	ENSG00000155304	HSPA13	-1	protein_coding	12.1522	14.5988	34.2985	13.1084	G6
X	50334647	50557302	ENSG00000158352	SHROOM4	-1	protein_coding	8.09029	9.94166	22.3694	17.2351	G6
20	48249482	48330415	ENSG00000158470	B4GALT5	-1	protein_coding	26.3146	33.0181	71.3443	38.5763	G6
2	75061108	75120486	ENSG00000159399	HK2	1	protein_coding	1.29606	2.30293	3.96303	2.10958	G6
11	64889252	64902004	ENSG00000162298	SYVN1	-1	protein_coding	9.44254	10.8356	36.022	9.9982	G6
1	56960419	57110974	ENSG00000162407	PPAP2B	-1	protein_coding	5.25714	6.92951	13.8761	10.4355	G6
1	101361632	101447309	ENSG00000162695	SLC30A7	1	protein_coding	6.99225	11.501	17.6603	11.1687	G6
5	36098514	36152063	ENSG00000164187	LMBRD2	-1	protein_coding	0.550083	0.759301	4.25679	1.09727	G6
5	126853301	126890781	ENSG00000164244	PRRC1	1	protein_coding	21.7062	24.9781	50.4471	24.3265	G6
12	77415027	77459360	ENSG00000165891	E2F7	-1	protein_coding	1.2866	1.72744	2.88004	1.07366	G6
15	40091233	40213093	ENSG00000166073	GPR176	-1	protein_coding	5.05033	5.2639	12.4512	8.88433	G6
15	78423840	78464291	ENSG00000166411	IDH3A	1	protein_coding	6.70894	11.0439	15.3524	11.5251	G6
11	9302201	9336327	ENSG00000166471	TMEM41B	-1	protein_coding	12.6669	15.7001	34.9297	11.6076	G6
15	67356101	67487533	ENSG00000166949	SMAD3	1	protein_coding	16.3648	20.0435	39.0095	18.3192	G6
19	42724423	42732353	ENSG00000167625	ZNF526	1	protein_coding	1.40815	1.67452	3.2276	2.03332	G6
10	74033678	74035794	ENSG00000168209	DDIT4	1	protein_coding	5.25199	7.44239	19.8161	7.55567	G6
3	136537489	136574734	ENSG00000168917	SLC35G2	1	protein_coding	4.18712	7.51688	10.2044	9.12269	G6
3	155538813	155572218	ENSG00000169359	SLC33A1	-1	protein_coding	7.3705	10.5511	23.8504	8.17524	G6
2	185463093	185804219	ENSG00000170396	ZNF804A	1	protein_coding	0.415726	0.726525	3.13018	0.432913	G6
12	20522179	20837315	ENSG00000172572	PDE3A	1	protein_coding	1.44435	2.00696	2.92912	1.86996	G6
3	183205319	183273477	ENSG00000172578	KLHL6	-1	protein_coding	5.28384	4.84728	10.6129	7.72974	G6
17	33677324	33700720	ENSG00000172716	SLFN11	-1	protein_coding	25.411	33.6591	79.553	24.1626	G6
3	49754277	49761384	ENSG00000173540	GMPPB	-1	protein_coding	4.4864	3.79615	13.1004	6.92378	G6
12	110718561	110788898	ENSG00000174437	ATP2A2	1	protein_coding	42.4138	54.5081	113.544	45.6614	G6
16	29916333	29938356	ENSG00000174943	KCTD13	-1	protein_coding	6.61205	10.017	16.8923	12.7781	G6
3	119148347	119187677	ENSG00000176142	TMEM39A	-1	protein_coding	16.1456	22.6148	34.0619	24.9275	G6
12	45609770	45834187	ENSG00000177119	ANO6	1	protein_coding	14.3776	16.84	32.6085	27.6843	G6
7	1191707	1200395	ENSG00000178381	ZFAND2A	-1	protein_coding	6.69685	12.1634	20.2723	9.6712	G6
7	137559725	137686813	ENSG00000182158	CREB3L2	-1	protein_coding	12.5186	13.3421	25.9016	12.493	G6
8	118806729	119124092	ENSG00000182197	EXT1	-1	protein_coding	27.6777	32.533	79.2761	54.8841	G6
22	41829496	41843027	ENSG00000183864	TOB2	-1	protein_coding	5.86397	8.09757	12.8332	10.0994	G6
12	123868320	123893905	ENSG00000183955	SETD8	1	protein_coding	14.0945	16.4373	30.0428	21.2223	G6
22	19701987	19712295	ENSG00000184702	2018-09-05	1	protein_coding	7.3075	9.30732	20.4497	10.6777	G6
17	74261283	74267375	ENSG00000185262	UBALD2	1	protein_coding	32.0141	31.1047	84.9695	67.7727	G6
X	134382867	134478012	ENSG00000186376	ZNF75D	-1	protein_coding	1.69218	1.95082	5.06913	2.2978	G6
22	46546424	46639653	ENSG00000186951	PPARA	1	protein_coding	1.69456	1.7095	6.51627	4.61063	G6
19	13972877	13991571	ENSG00000187556	NANOS3	1	protein_coding	0	0	2.68658	0.603514	G6
22	24083769	24093279	ENSG00000187792	ZNF70	-1	protein_coding	0.840959	0.920498	2.05444	1.02257	G6
20	20370196	20693131	ENSG00000188559	RALGAPA2	-1	protein_coding	7.13079	11.3	21.762	13.9268	G6
1	89990395	90063423	ENSG00000197147	LRRC8B	1	protein_coding	8.83438	15.218	39.2161	19.7285	G6
X	1710486	1721407	ENSG00000197976	AKAP17A	1	protein_coding	6.39857	7.63812	13.5061	7.8147	G6
10	101419263	101465997	ENSG00000198018	ENTPD7	1	protein_coding	3.5921	3.20548	12.0713	5.23288	G6
12	62102040	62672931	ENSG00000198673	FAM19A2	-1	protein_coding	0.0740704	0.990871	1.95452	1.29296	G6
12	108908962	108919614	ENSG00000198855	FICD	1	protein_coding	2.00293	3.99195	8.91526	2.41294	G6
5	108670410	108745695	ENSG00000198961	PJA2	-1	protein_coding	20.0263	24.5648	46.7698	24.0056	G6
13	107820883	108519083	ENSG00000204442	FAM155A	-1	protein_coding	0.954801	1.64213	2.74644	2.17773	G6
1	39174603	39176562	ENSG00000215895		1	pseudogene	0.299467	0.506907	1.72571	0.771044	G6
2	68405989	68483369	ENSG00000221823	PPP3R1	-1	protein_coding	15.5183	17.7703	31.7155	14.8375	G6
1	101721830	101722172	ENSG00000228399		1	pseudogene	0	0	2.72968	0.574785	G6
7	45022622	45026560	ENSG00000232956	SNHG15	-1	lincRNA	3.01137	3.43384	22.6846	15.0296	G6
9	37079893	37090398	ENSG00000233137		1	lincRNA	9.14406	10.6256	18.4094	13.3108	G6
3	40803036	40803290	ENSG00000234287		1	pseudogene	0	1.58256	5.17687	2.42635	G6
7	22813265	22813612	ENSG00000234513		-1	pseudogene	0	2.38564	7.68747	2.04327	G6
10	31982012	31996316	ENSG00000237797		-1	lincRNA	0	0	3.25618	0	G6
3	183165396	183173801	ENSG00000240024	LINC00888	1	pseudogene	3.87279	3.72396	10.6101	7.62049	G6
5	140855580	140892542	ENSG00000240184	PCDHGC3	1	protein_coding	4.14075	5.84315	13.9572	9.75171	G6
3	185764097	185828107	ENSG00000244405	ETV5	-1	protein_coding	5.84373	6.35483	20.917	9.81722	G6
5	98169086	98169415	ENSG00000250162	CSNK1A1P3	1	pseudogene	0	0.293732	4.15939	0.553658	G6
7	143339348	143534026	ENSG00000253882		-1	pseudogene	5.6095	9.29858	13.0945	8.51886	G6
19	18303992	18307758	ENSG00000254858	MPV17L2	1	protein_coding	3.57574	1.83707	9.5786	5.32222	G6
18	74240612	74322925	ENSG00000263812	LINC00908	1	protein_coding	0	0.966318	2.01721	1.24311	G6
7	152435527	152435815	ENSG00000265439	RN7SL811P	-1	misc_RNA	0	0.351737	4.85254	0.972743	G6
9	4676600	4679502	ENSG00000273061		-1	lincRNA	0	1.51317	6.21145	1.76898	G6
6	35226686	35263762	ENSG00000065029	ZNF76	1	protein_coding	8.61632	4.13555	13.5445	15.099	G7
7	107301080	107358254	ENSG00000091137	SLC26A4	1	protein_coding	2.06661	0.472526	2.16213	3.87553	G7
10	45466429	45474258	ENSG00000165507	C10orf10	-1	protein_coding	37.7715	14.4527	62.0244	109.747	G7
7	93514709	93520303	ENSG00000105825	TFPI2	-1	protein_coding	31.1384	77.0674	177.3	239.177	G7
17	17397751	17399709	ENSG00000108551	RASD1	-1	protein_coding	1.42014	4.17018	9.46492	9.97753	G7
1	185265520	185286461	ENSG00000116679	IVNS1ABP	-1	protein_coding	22.3045	59.4061	67.6754	83.3496	G7
19	38226734	38307940	ENSG00000189144	ZNF573	-1	protein_coding	0.705774	2.44648	1.04041	3.71542	G7
7	536895	559933	ENSG00000197461	PDGFA	-1	protein_coding	11.5666	24.5384	32.1819	37.6966	G7
2	108994367	109004513	ENSG00000198075	SULT1C4	1	protein_coding	7.48107	16.9238	34.6916	34.0524	G7
8	144362331	144363860	ENSG00000253716		-1	antisense	0	3.064	1.28495	4.09467	G7
3	13521224	13547916	ENSG00000163517	HDAC11	1	protein_coding	4.54624	2.1583	1.77223	11.0495	G7
19	44150247	44174699	ENSG00000011422	PLAUR	-1	protein_coding	21.8182	33.6011	55.8731	59.9725	G7
2	31456880	31492313	ENSG00000013016	EHD3	1	protein_coding	0.735498	0.935969	3.56634	14.8297	G7
7	18126572	19042039	ENSG00000048052	HDAC9	1	protein_coding	0.412548	1.08895	3.69723	3.78925	G7
18	55711599	56068772	ENSG00000049759	NEDD4L	1	protein_coding	8.40777	9.21952	22.395	30.9764	G7
6	106534195	106557814	ENSG00000057657	PRDM1	1	protein_coding	0.716702	0.923608	3.60794	6.32183	G7
16	2075357	2089027	ENSG00000065054	SLC9A3R2	1	protein_coding	7.29968	5.82217	19.5497	24.3066	G7
14	104605060	104647231	ENSG00000066735	KIF26A	1	protein_coding	0.728556	0.95355	1.73253	1.65868	G7
10	134351324	134596979	ENSG00000068383	INPP5A	1	protein_coding	9.01887	11.547	20.0911	19.8878	G7
11	17229700	17371521	ENSG00000070081	NUCB2	1	protein_coding	48.7446	47.6476	121.76	130.576	G7
10	62629196	62761198	ENSG00000072422	RHOBTB1	-1	protein_coding	8.91806	11.4876	19.236	18.8277	G7
1	208195587	208417665	ENSG00000076356	PLXNA2	-1	protein_coding	14.1047	17.825	31.8854	30.6305	G7
18	55313658	55470333	ENSG00000081923	ATP8B1	-1	protein_coding	24.0691	31.1138	49.5985	47.5119	G7
14	52471521	52535712	ENSG00000087303	NID2	-1	protein_coding	16.511	31.0637	47.4399	46.6409	G7
3	186285192	186315061	ENSG00000090520	DNAJB11	1	protein_coding	164.939	264.045	627.235	636.868	G7
3	189674517	189840226	ENSG00000090530	LEPREL1	-1	protein_coding	1.72754	1.96789	10.1205	19.5703	G7
8	6357172	6420930	ENSG00000091879	ANGPT2	-1	protein_coding	28.9217	31.7456	66.3735	67.0765	G7
9	100819021	100845357	ENSG00000095380	NANS	1	protein_coding	28.4806	32.206	66.3639	61.6706	G7
19	38810484	38819660	ENSG00000099337	KCNK6	1	protein_coding	4.27639	2.92204	10.411	15.4058	G7
20	61584052	61599949	ENSG00000101194	SLC17A9	1	protein_coding	7.74544	7.23947	18.5257	16.8824	G7
X	134021656	134049297	ENSG00000101928	MOSPD1	-1	protein_coding	8.54066	9.93841	17.5564	21.4846	G7
X	77081861	77151090	ENSG00000102158	MAGT1	-1	protein_coding	17.8114	18.9544	44.0548	39.7397	G7
13	28874489	29069265	ENSG00000102755	FLT1	-1	protein_coding	21.432	30.8364	52.5962	57.0437	G7
8	42032236	42065242	ENSG00000104368	PLAT	-1	protein_coding	20.0455	20.4504	43.0797	73.8955	G7
10	124134212	124191867	ENSG00000107679	PLEKHA1	1	protein_coding	17.25	23.2881	39.1255	35.5494	G7
[truncated: 136 more rows]

## Sheet: MAFs targets
Table of potential MAF targets
[truncated: 761 more rows]
