# Supplementary material for: A dynamic and integrated epigenetic program at distal regions orchestrates transcriptional responses to VEGFA
Source: HighWire-hosted journal article supplement (doi:10.1101/gr.239053.118), 2019-01-22
Supplement: Supplemental_Table_S3.xlsx [file Supplemental_Table_S3.xlsx]

## Sheet: summary
Supplemental_Table_S3: The genomic coordinates of AE, PE, RE, SE ERG, ETS, FL1, JUN, RBPJ, GATA2, EP300 and EZH2 peaks
Sheet name
AE
PE
RE
SE
ERG
ETS1
FLI
JUN
RBPJ
GAGA2
EP300
EZH2

## Sheet: AE
chr	start	end	peak
chr10	129920329	129920527	H12-Merged-chr10-129920428-1
chr17	75459252	75459601	H12-Merged-chr17-75459426-1
chr11	77406625	77407137	H12-Merged-chr11-77406881-1
chr10	134195457	134195773	H12-Merged-chr10-134195615-1
chr10	134198777	134199201	H12-Merged-chr10-134198989-1
chr11	78278115	78278336	H12-Merged-chr11-78278225-1
chr10	135513116	135513480	H12-Merged-chr10-135513298-1
chr11	82461651	82462074	H12-Merged-chr11-82461862-1
chr11	82535324	82535818	H12-Merged-chr11-82535571-1
chr20	34603329	34603651	H12-Merged-chr20-34603490-1
chr20	34691423	34692199	H12-Merged-chr20-34691811-1
chr20	35107755	35107958	H12-Merged-chr20-35107856-1
chr20	35474635	35474957	H12-Merged-chr20-35474796-1
chr2	198310325	198310636	H12-Merged-chr2-198310480-1
chr15	99438777	99441483	H12-Merged-chr15-99440130-1
chr15	99667984	99668666	H12-Merged-chr15-99668325-1
chr15	36032873	36033668	H12-Merged-chr15-36033270-1
chr15	36278349	36278943	H12-Merged-chr15-36278646-1
chr15	36649224	36650106	H12-Merged-chr15-36649665-1
chr15	37083090	37083309	H12-Merged-chr15-37083199-1
chr2	198784433	198785031	H12-Merged-chr2-198784732-1
chr15	37236145	37236743	H12-Merged-chr15-37236444-1
chr6	28237146	28237895	H12-Merged-chr6-28237520-1
chr15	38666909	38667145	H12-Merged-chr15-38667027-1
chr15	38690386	38690805	H12-Merged-chr15-38690595-1
chr15	38782321	38782532	H12-Merged-chr15-38782426-1
chr2	201683299	201684126	H12-Merged-chr2-201683712-1
chr6	28921312	28921550	H12-Merged-chr6-28921431-1
chr15	100260529	100260844	H12-Merged-chr15-100260686-1
chr15	100523845	100524145	H12-Merged-chr15-100523995-1
chr2	201904637	201905403	H12-Merged-chr2-201905020-1
chr6	28967373	28967815	H12-Merged-chr6-28967594-1
chr2	202067110	202067493	H12-Merged-chr2-202067301-1
chr6	29953570	29954779	H12-Merged-chr6-29954174-1
chr20	37511696	37512411	H12-Merged-chr20-37512053-1
chr20	37533906	37534106	H12-Merged-chr20-37534006-1
chr2	202288849	202289318	H12-Merged-chr2-202289083-1
chr1	246484274	246484536	H12-Merged-chr1-246484405-1
chr1	246742819	246743067	H12-Merged-chr1-246742943-1
chr1	246751731	246751942	H12-Merged-chr1-246751836-1
chr15	101999226	101999482	H12-Merged-chr15-101999354-1
chr1	164741165	164741413	H12-Merged-chr1-164741289-1
chr15	40217553	40218121	H12-Merged-chr15-40217837-1
chr1	246860268	246860505	H12-Merged-chr1-246860386-1
chr1	165818684	165819211	H12-Merged-chr1-165818947-1
chr1	165824749	165825535	H12-Merged-chr1-165825142-1
chr1	165837940	165838222	H12-Merged-chr1-165838081-1
chr1	249128630	249129207	H12-Merged-chr1-249128918-1
chr1	167570573	167571147	H12-Merged-chr1-167570860-1
chr1	249228494	249228845	H12-Merged-chr1-249228669-1
chr1	167880688	167880916	H12-Merged-chr1-167880802-1
chr1	169478759	169479674	H12-Merged-chr1-169479216-1
chr1	170463846	170464051	H12-Merged-chr1-170463948-1
chr10	3407363	3408671	H12-Merged-chr10-3408017-1
chr1	171463812	171464061	H12-Merged-chr1-171463936-1
chr1	171699180	171699743	H12-Merged-chr1-171699461-1
chr8	95430223	95430832	H12-Merged-chr8-95430527-1
chr4	156560477	156561726	H12-Merged-chr4-156561101-1
chr9	38699452	38699939	H12-Merged-chr9-38699695-1
chr8	96129032	96129383	H12-Merged-chr8-96129207-1
chr2	48463588	48463939	H12-Merged-chr2-48463763-1
chr4	159020768	159021051	H12-Merged-chr4-159020909-1
chr4	159035803	159036047	H12-Merged-chr4-159035925-1
chr9	40738862	40740436	H12-Merged-chr9-40739649-1
chr8	97330837	97331417	H12-Merged-chr8-97331127-1
chr13	74600951	74601184	H12-Merged-chr13-74601067-1
chr4	159433993	159434441	H12-Merged-chr4-159434217-1
chr9	41311786	41311984	H12-Merged-chr9-41311885-1
chr12	97384490	97384712	H12-Merged-chr12-97384601-1
chr8	97343833	97344062	H12-Merged-chr8-97343947-1
chr8	97940793	97941092	H12-Merged-chr8-97940942-1
chr13	75261665	75261967	H12-Merged-chr13-75261816-1
chr9	41711614	41711812	H12-Merged-chr9-41711713-1
chr12	98799620	98800206	H12-Merged-chr12-98799913-1
chr8	98810256	98810842	H12-Merged-chr8-98810549-1
chr8	98817569	98817771	H12-Merged-chr8-98817670-1
chr13	75484642	75484944	H12-Merged-chr13-75484793-1
chr13	75541342	75541689	H12-Merged-chr13-75541515-1
chr2	54435070	54435552	H12-Merged-chr2-54435311-1
chr2	54453629	54453846	H12-Merged-chr2-54453737-1
chr2	54538910	54539227	H12-Merged-chr2-54539068-1
chr4	160018911	160019184	H12-Merged-chr4-160019047-1
chr13	75935571	75935769	H12-Merged-chr13-75935670-1
chr2	54629285	54629858	H12-Merged-chr2-54629571-1
chr2	54659714	54659982	H12-Merged-chr2-54659848-1
chr9	42776613	42777215	H12-Merged-chr9-42776914-1
chr4	160169581	160169811	H12-Merged-chr4-160169696-1
chr12	100947830	100948035	H12-Merged-chr12-100947932-1
chr13	76372116	76372546	H12-Merged-chr13-76372331-1
chr2	54671634	54672060	H12-Merged-chr2-54671847-1
chr13	76377350	76377640	H12-Merged-chr13-76377495-1
chr2	54702648	54703375	H12-Merged-chr2-54703011-1
chr4	160293716	160294104	H12-Merged-chr4-160293910-1
chr13	77277514	77277916	H12-Merged-chr13-77277715-1
chr12	102815263	102815725	H12-Merged-chr12-102815494-1
chr12	104328242	104329511	H12-Merged-chr12-104328876-1
chr2	55057633	55058000	H12-Merged-chr2-55057816-1
chr2	55246430	55246695	H12-Merged-chr2-55246562-1
chr13	78603063	78603600	H12-Merged-chr13-78603331-1
chr12	104685445	104686453	H12-Merged-chr12-104685949-1
chr12	104731628	104731932	H12-Merged-chr12-104731780-1
chr12	104917191	104917657	H12-Merged-chr12-104917424-1
chr7	2357448	2357835	H12-Merged-chr7-2357641-1
chr7	2412257	2412476	H12-Merged-chr7-2412366-1
chr7	102981444	102981652	H12-Merged-chr7-102981548-1
chr3	110382871	110383120	H12-Merged-chr3-110382995-1
chr3	111543104	111543433	H12-Merged-chr3-111543268-1
chr3	111588101	111589095	H12-Merged-chr3-111588598-1
chr3	111599087	111599492	H12-Merged-chr3-111599289-1
chr7	104658241	104658483	H12-Merged-chr7-104658362-1
chr7	104677871	104678155	H12-Merged-chr7-104678013-1
chr7	104681978	104682705	H12-Merged-chr7-104682341-1
chr3	11418685	11418961	H12-Merged-chr3-11418823-1
chr7	104937223	104937428	H12-Merged-chr7-104937325-1
chr3	11524699	11525045	H12-Merged-chr3-11524872-1
chr7	4699226	4699493	H12-Merged-chr7-4699359-1
chr17	76397487	76397952	H12-Merged-chr17-76397719-1
chr17	76755356	76755856	H12-Merged-chr17-76755606-1
chr3	11628347	11628707	H12-Merged-chr3-11628527-1
chr3	112291158	112291814	H12-Merged-chr3-112291486-1
chr7	105900055	105900694	H12-Merged-chr7-105900374-1
chr17	77049278	77049754	H12-Merged-chr17-77049516-1
chr17	19365136	19366177	H12-Merged-chr17-19365656-1
chr3	113472607	113474230	H12-Merged-chr3-113473418-1
chr17	19663734	19664130	H12-Merged-chr17-19663932-1
chr17	19866628	19866980	H12-Merged-chr17-19866804-1
chr11	1920660	1920861	H12-Merged-chr11-1920760-1
chr17	78383083	78383537	H12-Merged-chr17-78383310-1
chr17	20918659	20918925	H12-Merged-chr17-20918792-1
chr11	3120371	3120600	H12-Merged-chr11-3120485-1
chr11	4108454	4108793	H12-Merged-chr11-4108623-1
chrX	53414177	53414689	H12-Merged-chrX-53414433-1
chr5	138951320	138952559	H12-Merged-chr5-138951939-1
chr20	39889430	39890145	H12-Merged-chr20-39889787-1
chr20	39932567	39933077	H12-Merged-chr20-39932822-1
chr2	203457103	203457854	H12-Merged-chr2-203457478-1
chr6	30972379	30973615	H12-Merged-chr6-30972997-1
chrX	56778422	56778881	H12-Merged-chrX-56778651-1
chr20	40041914	40042120	H12-Merged-chr20-40042017-1
chr2	204321701	204322142	H12-Merged-chr2-204321921-1
chr6	31313003	31313524	H12-Merged-chr6-31313263-1
chr2	204537202	204537998	H12-Merged-chr2-204537600-1
chr2	204544061	204544336	H12-Merged-chr2-204544198-1
chr2	204659665	204660287	H12-Merged-chr2-204659976-1
chrX	62981802	62982117	H12-Merged-chrX-62981959-1
chr16	1381640	1382323	H12-Merged-chr16-1381981-1
chr20	42625057	42625791	H12-Merged-chr20-42625424-1
chrX	65896689	65897406	H12-Merged-chrX-65897047-1
chr15	41287882	41288796	H12-Merged-chr15-41288339-1
chr15	41378551	41378909	H12-Merged-chr15-41378730-1
chr6	31678750	31678948	H12-Merged-chr6-31678849-1
chr6	31736722	31736920	H12-Merged-chr6-31736821-1
chr5	140912680	140913167	H12-Merged-chr5-140912923-1
chr5	140913992	140914407	H12-Merged-chr5-140914199-1
chr20	43601657	43602054	H12-Merged-chr20-43601855-1
chr20	43655033	43655468	H12-Merged-chr20-43655250-1
chr15	42357690	42358473	H12-Merged-chr15-42358081-1
chr15	42790270	42793942	H12-Merged-chr15-42792106-1
chr15	42794757	42797613	H12-Merged-chr15-42796185-1
chr1	172486956	172487290	H12-Merged-chr1-172487123-1
chr1	172893541	172893887	H12-Merged-chr1-172893714-1
chr1	173431497	173431738	H12-Merged-chr1-173431617-1
chr1	173448880	173449471	H12-Merged-chr1-173449175-1
chr1	173847148	173847659	H12-Merged-chr1-173847403-1
chr9	43615095	43615849	H12-Merged-chr9-43615472-1
chr8	101346593	101347231	H12-Merged-chr8-101346912-1
chr8	101397909	101398505	H12-Merged-chr8-101398207-1
chr8	101445757	101446503	H12-Merged-chr8-101446130-1
chr8	101518643	101519262	H12-Merged-chr8-101518952-1
chr4	48578116	48578647	H12-Merged-chr4-48578381-1
chr4	48685956	48686428	H12-Merged-chr4-48686192-1
chr9	46893921	46894682	H12-Merged-chr9-46894301-1
chr2	55345927	55346251	H12-Merged-chr2-55346089-1
chr4	167953481	167953712	H12-Merged-chr4-167953596-1
chr19	45255579	45258330	H12-Merged-chr19-45256954-1
chr4	53513289	53514014	H12-Merged-chr4-53513651-1
chr8	102513425	102513814	H12-Merged-chr8-102513619-1
chr13	80066555	80066908	H12-Merged-chr13-80066731-1
chr13	80245510	80245759	H12-Merged-chr13-80245634-1
chr13	80324111	80324920	H12-Merged-chr13-80324515-1
chr12	105686203	105686678	H12-Merged-chr12-105686440-1
chr13	80933878	80934174	H12-Merged-chr13-80934026-1
chr9	69671419	69671741	H12-Merged-chr9-69671580-1
chr4	169954735	169955161	H12-Merged-chr4-169954948-1
chr4	55763919	55764546	H12-Merged-chr4-55764232-1
chr4	55771162	55771465	H12-Merged-chr4-55771313-1
chr2	56585148	56585346	H12-Merged-chr2-56585247-1
chr4	170338343	170339361	H12-Merged-chr4-170338852-1
chr12	106127156	106127849	H12-Merged-chr12-106127502-1
chr12	106138429	106138663	H12-Merged-chr12-106138546-1
chr13	91096989	91098138	H12-Merged-chr13-91097563-1
chr13	92468550	92469186	H12-Merged-chr13-92468868-1
chr13	94956924	94957584	H12-Merged-chr13-94957254-1
chr13	94969064	94969692	H12-Merged-chr13-94969378-1
chr12	106836340	106836587	H12-Merged-chr12-106836463-1
chr12	106921095	106921654	H12-Merged-chr12-106921374-1
chr19	46626913	46627161	H12-Merged-chr19-46627037-1
chr12	108940837	108941131	H12-Merged-chr12-108940984-1
chr7	5710500	5710927	H12-Merged-chr7-5710713-1
chr3	113586231	113586429	H12-Merged-chr3-113586330-1
chr3	114213213	114214244	H12-Merged-chr3-114213728-1
chr7	107224782	107225149	H12-Merged-chr7-107224965-1
chr3	114930792	114931808	H12-Merged-chr3-114931300-1
chr7	107349089	107349471	H12-Merged-chr7-107349280-1
chr17	79021210	79022271	H12-Merged-chr17-79021740-1
chr3	118994874	118995722	H12-Merged-chr3-118995298-1
chr7	10264430	10265201	H12-Merged-chr7-10264815-1
chr7	11631166	11631368	H12-Merged-chr7-11631267-1
chr17	79542832	79545276	H12-Merged-chr17-79544054-1
chr3	15583893	15584551	H12-Merged-chr3-15584222-1
chr7	11656151	11656440	H12-Merged-chr7-11656295-1
chr7	11738062	11738280	H12-Merged-chr7-11738171-1
chr17	79565489	79565871	H12-Merged-chr17-79565680-1
chr7	109957568	109958462	H12-Merged-chr7-109958015-1
chr7	109969950	109970289	H12-Merged-chr7-109970119-1
chr17	25947702	25948305	H12-Merged-chr17-25948003-1
chr17	26273957	26274209	H12-Merged-chr17-26274083-1
chr3	119611104	119611452	H12-Merged-chr3-119611278-1
chr17	26504185	26504593	H12-Merged-chr17-26504389-1
chr3	16136201	16136831	H12-Merged-chr3-16136516-1
chr7	12961447	12961902	H12-Merged-chr7-12961674-1
chr3	16417147	16417857	H12-Merged-chr3-16417502-1
chr11	6739956	6740176	H12-Merged-chr11-6740066-1
chr17	27104216	27104853	H12-Merged-chr17-27104534-1
chr11	7013845	7014513	H12-Merged-chr11-7014179-1
chr11	7930847	7932194	H12-Merged-chr11-7931520-1
chr11	8003427	8004819	H12-Merged-chr11-8004123-1
chr11	8730019	8730217	H12-Merged-chr11-8730118-1
chr11	8782340	8783306	H12-Merged-chr11-8782823-1
chr11	8885439	8886092	H12-Merged-chr11-8885765-1
chr2	206798673	206799136	H12-Merged-chr2-206798904-1
chr6	32986727	32987216	H12-Merged-chr6-32986971-1
chr5	141532851	141533872	H12-Merged-chr5-141533361-1
chrX	70323707	70323941	H12-Merged-chrX-70323824-1
chr20	44759174	44759960	H12-Merged-chr20-44759567-1
chr5	141639914	141640246	H12-Merged-chr5-141640080-1
chrX	70590276	70591301	H12-Merged-chrX-70590788-1
chrX	70593223	70594225	H12-Merged-chrX-70593724-1
chr16	2923202	2923432	H12-Merged-chr16-2923317-1
chr6	33477097	33477340	H12-Merged-chr6-33477218-1
chr15	43776147	43776894	H12-Merged-chr15-43776520-1
chr5	141798940	141799317	H12-Merged-chr5-141799128-1
chr5	141833116	141834193	H12-Merged-chr5-141833654-1
chr5	141888370	141889089	H12-Merged-chr5-141888729-1
chr6	34201964	34202188	H12-Merged-chr6-34202076-1
chr5	142105704	142107095	H12-Merged-chr5-142106399-1
chr15	44380431	44380794	H12-Merged-chr15-44380612-1
chr6	34250492	34250921	H12-Merged-chr6-34250706-1
chr16	3541073	3541455	H12-Merged-chr16-3541264-1
chr20	46486578	46486818	H12-Merged-chr20-46486698-1
chr2	208725818	208726727	H12-Merged-chr2-208726272-1
chr6	34494740	34494949	H12-Merged-chr6-34494844-1
chr5	142290112	142290338	H12-Merged-chr5-142290225-1
chr16	3879600	3880427	H12-Merged-chr16-3880013-1
chr2	210808157	210808637	H12-Merged-chr2-210808397-1
chr5	142315195	142315726	H12-Merged-chr5-142315460-1
chr16	4109707	4110537	H12-Merged-chr16-4110122-1
chr2	211764112	211764368	H12-Merged-chr2-211764240-1
chr6	34988550	34989160	H12-Merged-chr6-34988855-1
chr2	212616373	212616604	H12-Merged-chr2-212616488-1
chr6	35141254	35142033	H12-Merged-chr6-35141643-1
chr5	142869719	142869999	H12-Merged-chr5-142869859-1
chr5	142985143	142985344	H12-Merged-chr5-142985243-1
chr15	46386788	46387148	H12-Merged-chr15-46386968-1
chr1	178269406	178269632	H12-Merged-chr1-178269519-1
chr1	181046505	181047202	H12-Merged-chr1-181046853-1
chr8	106377046	106377311	H12-Merged-chr8-106377178-1
chr4	173959498	173959742	H12-Merged-chr4-173959620-1
chr4	174027641	174029643	H12-Merged-chr4-174028642-1
chr9	72006782	72007104	H12-Merged-chr9-72006943-1
chr4	56303860	56304237	H12-Merged-chr4-56304048-1
chr4	56732618	56733389	H12-Merged-chr4-56733003-1
chr9	72360731	72361350	H12-Merged-chr9-72361040-1
chr4	57237637	57238435	H12-Merged-chr4-57238036-1
chr8	107610285	107610856	H12-Merged-chr8-107610570-1
chr4	177246244	177246442	H12-Merged-chr4-177246343-1
chr9	72628406	72628891	H12-Merged-chr9-72628648-1
chr4	57498982	57499253	H12-Merged-chr4-57499117-1
chr2	62625490	62625863	H12-Merged-chr2-62625676-1
chr4	177666155	177666630	H12-Merged-chr4-177666392-1
chr8	110306895	110307124	H12-Merged-chr8-110307009-1
chr2	63798183	63798400	H12-Merged-chr2-63798291-1
chr4	183574840	183575038	H12-Merged-chr4-183574939-1
chr9	74286669	74287002	H12-Merged-chr9-74286835-1
chr9	74295517	74295748	H12-Merged-chr9-74295632-1
chr12	109214027	109214905	H12-Merged-chr12-109214466-1
chr4	67296817	67297015	H12-Merged-chr4-67296916-1
chr2	64464219	64465239	H12-Merged-chr2-64464729-1
chr9	74432025	74432547	H12-Merged-chr9-74432286-1
chr8	117463138	117463918	H12-Merged-chr8-117463528-1
chr8	117682504	117682829	H12-Merged-chr8-117682666-1
chr4	184355686	184356063	H12-Merged-chr4-184355874-1
chr4	70611302	70611963	H12-Merged-chr4-70611632-1
chr2	64954173	64954675	H12-Merged-chr2-64954424-1
chr13	98862382	98862620	H12-Merged-chr13-98862501-1
chr4	184420069	184420829	H12-Merged-chr4-184420449-1
chr4	185208736	185209196	H12-Merged-chr4-185208966-1
chr12	110322143	110323049	H12-Merged-chr12-110322596-1
chr2	65105966	65106664	H12-Merged-chr2-65106315-1
chr4	71726045	71726328	H12-Merged-chr4-71726186-1
chr13	99454198	99454649	H12-Merged-chr13-99454423-1
chr13	99551606	99551825	H12-Merged-chr13-99551715-1
chr2	65556271	65557362	H12-Merged-chr2-65556816-1
chr2	65604582	65604853	H12-Merged-chr2-65604717-1
chr2	65610516	65611588	H12-Merged-chr2-65611052-1
chr12	110822442	110823128	H12-Merged-chr12-110822785-1
chr13	99593907	99594121	H12-Merged-chr13-99594014-1
chr12	111115326	111115762	H12-Merged-chr12-111115544-1
chr12	111210474	111210900	H12-Merged-chr12-111210687-1
chr7	111403171	111404086	H12-Merged-chr7-111403628-1
chr7	15011454	15011652	H12-Merged-chr7-15011553-1
chr7	111544055	111544582	H12-Merged-chr7-111544318-1
chr7	111553162	111553360	H12-Merged-chr7-111553261-1
chr7	111566027	111566413	H12-Merged-chr7-111566220-1
chr7	15596960	15597158	H12-Merged-chr7-15597059-1
chr3	121320381	121320642	H12-Merged-chr3-121320511-1
chr3	17621196	17621418	H12-Merged-chr3-17621307-1
chr3	17627051	17627702	H12-Merged-chr3-17627376-1
chr3	121450164	121450389	H12-Merged-chr3-121450276-1
chr3	122188112	122188474	H12-Merged-chr3-122188293-1
chr3	122433334	122433568	H12-Merged-chr3-122433451-1
chr3	20689965	20690476	H12-Merged-chr3-20690220-1
chr7	16209224	16210058	H12-Merged-chr7-16209641-1
chr7	16396058	16396264	H12-Merged-chr7-16396161-1
chr7	16639601	16640339	H12-Merged-chr7-16639970-1
chr7	112216451	112216669	H12-Merged-chr7-112216560-1
chr7	112420690	112420963	H12-Merged-chr7-112420826-1
chr3	123368845	123369469	H12-Merged-chr3-123369157-1
chr7	113424614	113425087	H12-Merged-chr7-113424850-1
chr7	113433420	113433966	H12-Merged-chr7-113433693-1
chr3	123430886	123431572	H12-Merged-chr3-123431229-1
chr7	17074210	17074752	H12-Merged-chr7-17074481-1
chr7	17342887	17343096	H12-Merged-chr7-17342991-1
chr7	114626601	114626888	H12-Merged-chr7-114626744-1
chr3	23961582	23961970	H12-Merged-chr3-23961776-1
chr3	123976396	123977243	H12-Merged-chr3-123976819-1
chr7	115873278	115873536	H12-Merged-chr7-115873407-1
chr17	28989402	28989694	H12-Merged-chr17-28989548-1
chr18	570195	570875	H12-Merged-chr18-570535-1
chr10	63730203	63730440	H12-Merged-chr10-63730321-1
chr3	25862234	25862438	H12-Merged-chr3-25862336-1
chr18	2604406	2605410	H12-Merged-chr18-2604908-1
chr18	3010073	3011196	H12-Merged-chr18-3010634-1
chr11	9944380	9944727	H12-Merged-chr11-9944553-1
chr11	9993693	9994384	H12-Merged-chr11-9994038-1
chr18	3132485	3133270	H12-Merged-chr18-3132877-1
chr10	65043376	65044112	H12-Merged-chr10-65043744-1
chr11	10043216	10043480	H12-Merged-chr11-10043348-1
chr11	10061737	10061944	H12-Merged-chr11-10061840-1
chr10	65532471	65533270	H12-Merged-chr10-65532870-1
chr10	66522763	66522961	H12-Merged-chr10-66522862-1
chr10	67079116	67079844	H12-Merged-chr10-67079480-1
chrX	78655683	78655960	H12-Merged-chrX-78655821-1
chrX	83628191	83628601	H12-Merged-chrX-83628396-1
chr20	47496310	47496562	H12-Merged-chr20-47496436-1
chrX	89712786	89713073	H12-Merged-chrX-89712929-1
chrX	95628051	95628550	H12-Merged-chrX-95628300-1
chr20	47681345	47681566	H12-Merged-chr20-47681455-1
chr2	216192306	216192693	H12-Merged-chr2-216192499-1
chr6	35597469	35597854	H12-Merged-chr6-35597661-1
chrX	95699997	95700719	H12-Merged-chrX-95700358-1
chr16	4901341	4903952	H12-Merged-chr16-4902646-1
chr16	4907153	4907753	H12-Merged-chr16-4907453-1
chr15	47669620	47669900	H12-Merged-chr15-47669760-1
chr6	35648576	35649275	H12-Merged-chr6-35648925-1
chr5	145847277	145847497	H12-Merged-chr5-145847387-1
chr5	145880366	145880564	H12-Merged-chr5-145880465-1
chr2	216436846	216437349	H12-Merged-chr2-216437097-1
chr16	9188469	9190021	H12-Merged-chr16-9189245-1
chr15	48003552	48003818	H12-Merged-chr15-48003685-1
chr6	36382376	36382574	H12-Merged-chr6-36382475-1
chr5	146870338	146870751	H12-Merged-chr5-146870544-1
chrX	99965667	99966219	H12-Merged-chrX-99965943-1
chr16	10561853	10562500	H12-Merged-chr16-10562176-1
chr16	10658414	10658655	H12-Merged-chr16-10658534-1
chr15	48797193	48797391	H12-Merged-chr15-48797292-1
chr5	146931230	146931491	H12-Merged-chr5-146931360-1
chr5	147348319	147348670	H12-Merged-chr5-147348494-1
chr5	147759569	147759777	H12-Merged-chr5-147759673-1
chr16	11030922	11031691	H12-Merged-chr16-11031306-1
chr2	216983049	216983513	H12-Merged-chr2-216983281-1
chr2	217075166	217075655	H12-Merged-chr2-217075410-1
chr2	217264161	217264681	H12-Merged-chr2-217264421-1
chr5	148310404	148310657	H12-Merged-chr5-148310530-1
chr15	49396322	49396994	H12-Merged-chr15-49396658-1
chr20	49275516	49275925	H12-Merged-chr20-49275720-1
chr5	148648155	148649060	H12-Merged-chr5-148648607-1
chr1	182965319	182965691	H12-Merged-chr1-182965505-1
chr16	12448354	12448552	H12-Merged-chr16-12448453-1
chr1	183514073	183514444	H12-Merged-chr1-183514258-1
chr1	183519420	183520006	H12-Merged-chr1-183519713-1
chr1	183624697	183625102	H12-Merged-chr1-183624899-1
chr1	183824784	183825202	H12-Merged-chr1-183824993-1
chr1	184789346	184790296	H12-Merged-chr1-184789821-1
chr1	184793403	184794272	H12-Merged-chr1-184793837-1
chr1	185273106	185273854	H12-Merged-chr1-185273480-1
chr9	75622255	75623109	H12-Merged-chr9-75622682-1
chr1	89144155	89144403	H12-Merged-chr1-89144279-1
chr1	89163872	89164143	H12-Merged-chr1-89164007-1
chr8	119094004	119094345	H12-Merged-chr8-119094174-1
chr4	73311781	73312146	H12-Merged-chr4-73311963-1
chr4	73567789	73568003	H12-Merged-chr4-73567896-1
chr4	185562263	185562694	H12-Merged-chr4-185562478-1
chr8	119779261	119779562	H12-Merged-chr8-119779411-1
chr4	74962056	74962539	H12-Merged-chr4-74962297-1
chr4	186256783	186257154	H12-Merged-chr4-186256968-1
chr19	49087178	49087567	H12-Merged-chr19-49087372-1
chr8	120931829	120932131	H12-Merged-chr8-120931980-1
chr8	121639952	121640411	H12-Merged-chr8-121640181-1
chr2	68422542	68422743	H12-Merged-chr2-68422642-1
chr12	111857236	111857434	H12-Merged-chr12-111857335-1
chr9	80378330	80378774	H12-Merged-chr9-80378552-1
chr9	80379860	80380794	H12-Merged-chr9-80380327-1
chr4	76729220	76729526	H12-Merged-chr4-76729373-1
chr2	69075055	69075542	H12-Merged-chr2-69075298-1
chr8	124402719	124403221	H12-Merged-chr8-124402970-1
chr13	101310498	101311455	H12-Merged-chr13-101310976-1
chr2	69370588	69371036	H12-Merged-chr2-69370812-1
chr9	80573580	80573779	H12-Merged-chr9-80573679-1
chr8	124512066	124513061	H12-Merged-chr8-124512563-1
chr8	124520177	124520582	H12-Merged-chr8-124520379-1
chr13	102144688	102145148	H12-Merged-chr13-102144918-1
chr4	77630492	77630715	H12-Merged-chr4-77630603-1
chr19	50183321	50183815	H12-Merged-chr19-50183568-1
chr4	77901439	77901818	H12-Merged-chr4-77901628-1
chr13	103455034	103455430	H12-Merged-chr13-103455232-1
chr12	116585622	116585856	H12-Merged-chr12-116585739-1
chr13	105800169	105800574	H12-Merged-chr13-105800371-1
chr12	116621728	116621944	H12-Merged-chr12-116621836-1
chr12	117362505	117362754	H12-Merged-chr12-117362629-1
chr7	20584325	20584887	H12-Merged-chr7-20584606-1
chr3	125067700	125068140	H12-Merged-chr3-125067920-1
chr3	27604694	27605056	H12-Merged-chr3-27604875-1
chr7	21942180	21942409	H12-Merged-chr7-21942294-1
chr7	116337737	116338146	H12-Merged-chr7-116337941-1
chr7	116339065	116340216	H12-Merged-chr7-116339640-1
chr7	116348711	116349138	H12-Merged-chr7-116348924-1
chr3	27707533	27708233	H12-Merged-chr3-27707883-1
chr3	27709217	27709667	H12-Merged-chr3-27709442-1
chr7	22309814	22310134	H12-Merged-chr7-22309974-1
chr3	126657881	126658229	H12-Merged-chr3-126658055-1
chr7	116409321	116410263	H12-Merged-chr7-116409792-1
chr3	29106975	29107328	H12-Merged-chr3-29107151-1
chr7	22373368	22373810	H12-Merged-chr7-22373589-1
chr3	29185745	29186445	H12-Merged-chr3-29186095-1
chr7	22432708	22433117	H12-Merged-chr7-22432912-1
chr18	3609209	3609943	H12-Merged-chr18-3609576-1
chr17	30896532	30896755	H12-Merged-chr17-30896643-1
chr18	5466509	5466994	H12-Merged-chr18-5466751-1
chr7	120187390	120188222	H12-Merged-chr7-120187806-1
chr7	120235308	120236037	H12-Merged-chr7-120235672-1
chr7	120380537	120380935	H12-Merged-chr7-120380736-1
chr17	32585423	32586258	H12-Merged-chr17-32585840-1
chr3	29805606	29805888	H12-Merged-chr3-29805747-1
chr18	6774063	6774263	H12-Merged-chr18-6774163-1
chr7	120636121	120637068	H12-Merged-chr7-120636594-1
chr7	121013762	121014078	H12-Merged-chr7-121013920-1
chr17	33373785	33374271	H12-Merged-chr17-33374028-1
chr18	7564637	7564940	H12-Merged-chr18-7564788-1
chr17	33540273	33540513	H12-Merged-chr17-33540393-1
chr3	30441928	30442126	H12-Merged-chr3-30442027-1
chr17	33702922	33703471	H12-Merged-chr17-33703196-1
chr3	128573121	128574188	H12-Merged-chr3-128573654-1
chr10	70692063	70692352	H12-Merged-chr10-70692207-1
chr18	8003783	8004380	H12-Merged-chr18-8004081-1
chr18	8620788	8621025	H12-Merged-chr18-8620906-1
chr17	34131614	34132452	H12-Merged-chr17-34132033-1
chr10	71080997	71082339	H12-Merged-chr10-71081668-1
chr10	71183721	71184413	H12-Merged-chr10-71184067-1
chr11	12799738	12800205	H12-Merged-chr11-12799971-1
chr11	13726824	13727497	H12-Merged-chr11-13727160-1
chr11	14357425	14357760	H12-Merged-chr11-14357592-1
chr6	37795598	37796156	H12-Merged-chr6-37795877-1
chr6	37826093	37826740	H12-Merged-chr6-37826416-1
chr6	38486118	38486347	H12-Merged-chr6-38486232-1
chr6	38580027	38580631	H12-Merged-chr6-38580329-1
chr5	148870348	148871433	H12-Merged-chr5-148870890-1
chr5	148887047	148887338	H12-Merged-chr5-148887192-1
chr5	148898434	148899347	H12-Merged-chr5-148898890-1
chr15	52171924	52172148	H12-Merged-chr15-52172036-1
chrX	106905573	106905985	H12-Merged-chrX-106905779-1
chr5	149429150	149430914	H12-Merged-chr5-149430032-1
chr5	149448375	149448608	H12-Merged-chr5-149448491-1
chr15	52720074	52720782	H12-Merged-chr15-52720428-1
chr5	149840512	149841538	H12-Merged-chr5-149841025-1
chrX	108952418	108953104	H12-Merged-chrX-108952761-1
chr2	220113068	220115251	H12-Merged-chr2-220114159-1
chr2	222330343	222330541	H12-Merged-chr2-222330442-1
chrX	112754012	112754210	H12-Merged-chrX-112754111-1
chrX	113344593	113344804	H12-Merged-chrX-113344698-1
chr2	222419699	222420189	H12-Merged-chr2-222419944-1
chr15	56087183	56087681	H12-Merged-chr15-56087432-1
chr15	56138584	56138833	H12-Merged-chr15-56138708-1
chr6	42498163	42498582	H12-Merged-chr6-42498372-1
chr6	42610842	42611049	H12-Merged-chr6-42610945-1
chr15	56458224	56459203	H12-Merged-chr15-56458713-1
chr2	223559873	223560701	H12-Merged-chr2-223560287-1
chr1	185422645	185423136	H12-Merged-chr1-185422890-1
chr1	185640442	185640656	H12-Merged-chr1-185640549-1
chr15	56912246	56912480	H12-Merged-chr15-56912363-1
chr1	89776604	89777495	H12-Merged-chr1-89777049-1
chr1	90016079	90016705	H12-Merged-chr1-90016392-1
chr15	57276884	57277408	H12-Merged-chr15-57277146-1
chr1	186631986	186632208	H12-Merged-chr1-186632097-1
chr1	90144629	90145071	H12-Merged-chr1-90144850-1
chr1	90809102	90810144	H12-Merged-chr1-90809623-1
chr1	90856897	90857095	H12-Merged-chr1-90856996-1
chr1	192717826	192718900	H12-Merged-chr1-192718363-1
chr1	92268788	92269217	H12-Merged-chr1-92269002-1
chr1	192780634	192780969	H12-Merged-chr1-192780801-1
chr1	93236477	93237115	H12-Merged-chr1-93236796-1
chr1	193337452	193337730	H12-Merged-chr1-193337591-1
chr1	194039948	194040676	H12-Merged-chr1-194040312-1
chr8	124772990	124773553	H12-Merged-chr8-124773271-1
chr8	125333615	125333947	H12-Merged-chr8-125333781-1
chr12	117571743	117572291	H12-Merged-chr12-117572017-1
chr12	117858942	117859837	H12-Merged-chr12-117859389-1
chr12	117911568	117911814	H12-Merged-chr12-117911691-1
chr8	126190347	126190559	H12-Merged-chr8-126190453-1
chr4	83642403	83642833	H12-Merged-chr4-83642618-1
chr4	83714500	83714698	H12-Merged-chr4-83714599-1
chr12	120120846	120121057	H12-Merged-chr12-120120951-1
chr3	31443544	31444255	H12-Merged-chr3-31443899-1
chr7	25894371	25895070	H12-Merged-chr7-25894720-1
chr3	31945859	31946447	H12-Merged-chr3-31946153-1
chr7	26411419	26411630	H12-Merged-chr7-26411524-1
chr3	32241879	32243023	H12-Merged-chr3-32242451-1
chr17	35998837	35999087	H12-Merged-chr17-35998962-1
chr3	32774038	32774274	H12-Merged-chr3-32774156-1
chr7	27762922	27763168	H12-Merged-chr7-27763045-1
chr3	33175899	33176354	H12-Merged-chr3-33176126-1
chr17	36991800	36992095	H12-Merged-chr17-36991947-1
chr7	27935368	27935717	H12-Merged-chr7-27935542-1
chr7	28101557	28101788	H12-Merged-chr7-28101672-1
chr17	37006484	37006918	H12-Merged-chr17-37006701-1
chr3	33467148	33467839	H12-Merged-chr3-33467493-1
chr7	28274732	28275370	H12-Merged-chr7-28275051-1
chr11	16825611	16826119	H12-Merged-chr11-16825865-1
chr11	17176100	17176339	H12-Merged-chr11-17176219-1
chr11	18350973	18351842	H12-Merged-chr11-18351407-1
chr11	18516187	18516385	H12-Merged-chr11-18516286-1
chr1	6562261	6562510	H12-Merged-chr1-6562385-1
chr10	74573847	74574137	H12-Merged-chr10-74573992-1
chr11	19934310	19934515	H12-Merged-chr11-19934412-1
chr10	75622612	75622834	H12-Merged-chr10-75622723-1
chr11	20375735	20376289	H12-Merged-chr11-20376012-1
chr1	8620848	8621890	H12-Merged-chr1-8621369-1
chr2	223653911	223654505	H12-Merged-chr2-223654208-1
chr5	153582665	153583052	H12-Merged-chr5-153582858-1
chr2	224794365	224795044	H12-Merged-chr2-224794704-1
chrX	117494480	117494685	H12-Merged-chrX-117494582-1
chrX	117863772	117865233	H12-Merged-chrX-117864502-1
chr15	57714061	57714624	H12-Merged-chr15-57714342-1
chr2	225006816	225007159	H12-Merged-chr2-225006987-1
chr2	225028684	225029235	H12-Merged-chr2-225028959-1
chr2	225303838	225304358	H12-Merged-chr2-225304098-1
chr5	154341443	154341887	H12-Merged-chr5-154341665-1
chr2	225455672	225455917	H12-Merged-chr2-225455794-1
chrX	118960617	118961076	H12-Merged-chrX-118960846-1
chr15	57910242	57911161	H12-Merged-chr15-57910701-1
chrX	119692257	119692459	H12-Merged-chrX-119692358-1
chr5	157282027	157282868	H12-Merged-chr5-157282447-1
chrX	122898748	122899289	H12-Merged-chrX-122899018-1
chr15	58516130	58516714	H12-Merged-chr15-58516422-1
chr15	58713751	58714064	H12-Merged-chr15-58713907-1
chr2	230698056	230698353	H12-Merged-chr2-230698204-1
chr5	157376072	157376310	H12-Merged-chr5-157376191-1
chr5	157540807	157541406	H12-Merged-chr5-157541106-1
chr2	230792225	230792682	H12-Merged-chr2-230792453-1
chr2	230991717	230992478	H12-Merged-chr2-230992097-1
chr5	158430154	158430788	H12-Merged-chr5-158430471-1
chr1	197148160	197148824	H12-Merged-chr1-197148492-1
chr1	198095238	198095489	H12-Merged-chr1-198095363-1
chr1	198743349	198743742	H12-Merged-chr1-198743545-1
chr15	59297477	59297966	H12-Merged-chr15-59297721-1
chr1	199174366	199175642	H12-Merged-chr1-199175004-1
chr1	94850337	94850776	H12-Merged-chr1-94850556-1
chr1	94928662	94929152	H12-Merged-chr1-94928907-1
chr8	127849782	127850124	H12-Merged-chr8-127849953-1
chr4	85783012	85783328	H12-Merged-chr4-85783170-1
chr8	128138743	128139279	H12-Merged-chr8-128139011-1
chr4	86312842	86313268	H12-Merged-chr4-86313055-1
chr8	128315155	128316046	H12-Merged-chr8-128315600-1
chr8	128869590	128870184	H12-Merged-chr8-128869887-1
chr4	87825168	87825586	H12-Merged-chr4-87825377-1
chr12	122231324	122232950	H12-Merged-chr12-122232137-1
chr4	87937088	87937952	H12-Merged-chr4-87937520-1
chr19	56169070	56169487	H12-Merged-chr19-56169278-1
chr4	88235768	88236480	H12-Merged-chr4-88236124-1
chr19	56805890	56806386	H12-Merged-chr19-56806138-1
chr4	88423981	88424602	H12-Merged-chr4-88424291-1
chr12	122787318	122787945	H12-Merged-chr12-122787631-1
chr4	88931842	88932270	H12-Merged-chr4-88932056-1
chr4	88983678	88984144	H12-Merged-chr4-88983911-1
chr4	89011705	89012738	H12-Merged-chr4-89012221-1
chr7	28993250	28993584	H12-Merged-chr7-28993417-1
chr7	29070314	29070850	H12-Merged-chr7-29070582-1
chr3	37150940	37151537	H12-Merged-chr3-37151238-1
chr16	71784369	71784691	H12-Merged-chr16-71784530-1
chr17	38795291	38796257	H12-Merged-chr17-38795774-1
chr17	39533530	39534483	H12-Merged-chr17-39534006-1
chr7	31811844	31812602	H12-Merged-chr7-31812223-1
chr3	39130260	39130685	H12-Merged-chr3-39130472-1
chr7	32614790	32615454	H12-Merged-chr7-32615122-1
chr7	32621222	32621420	H12-Merged-chr7-32621321-1
chr17	40175272	40178073	H12-Merged-chr17-40176672-1
chr3	40033578	40034112	H12-Merged-chr3-40033845-1
chr7	33089484	33090298	H12-Merged-chr7-33089891-1
chr10	75779317	75779745	H12-Merged-chr10-75779531-1
chr3	40354445	40354769	H12-Merged-chr3-40354607-1
chr3	41936232	41936686	H12-Merged-chr3-41936459-1
chr11	25882358	25882916	H12-Merged-chr11-25882637-1
chr10	76020120	76020333	H12-Merged-chr10-76020226-1
chr11	28094741	28095013	H12-Merged-chr11-28094877-1
chr10	76687426	76687629	H12-Merged-chr10-76687527-1
chr17	40917465	40917910	H12-Merged-chr17-40917687-1
chr1	8797073	8797775	H12-Merged-chr1-8797424-1
chr11	28844283	28844500	H12-Merged-chr11-28844391-1
chr1	8998716	8998929	H12-Merged-chr1-8998822-1
chr10	79131537	79132605	H12-Merged-chr10-79132071-1
chr1	9395918	9396116	H12-Merged-chr1-9396017-1
chr10	79795809	79796630	H12-Merged-chr10-79796219-1
chr1	9448854	9449088	H12-Merged-chr1-9448971-1
chr11	33255944	33256172	H12-Merged-chr11-33256058-1
chr10	79929719	79930383	H12-Merged-chr10-79930051-1
chr10	80059419	80060050	H12-Merged-chr10-80059734-1
chr10	80181068	80181277	H12-Merged-chr10-80181172-1
chr11	33567447	33568359	H12-Merged-chr11-33567903-1
chr10	80280418	80280638	H12-Merged-chr10-80280528-1
chr1	9815442	9816080	H12-Merged-chr1-9815761-1
chr11	33670240	33670781	H12-Merged-chr11-33670510-1
chr11	33880376	33880726	H12-Merged-chr11-33880551-1
chr5	73118111	73118862	H12-Merged-chr5-73118486-1
chr5	73196748	73197584	H12-Merged-chr5-73197166-1
chr2	231200092	231200304	H12-Merged-chr2-231200198-1
chr2	136424232	136424480	H12-Merged-chr2-136424356-1
chr5	159334816	159335092	H12-Merged-chr5-159334954-1
chr2	136670529	136671347	H12-Merged-chr2-136670938-1
chr15	59569081	59569307	H12-Merged-chr15-59569194-1
chr14	65111834	65112640	H12-Merged-chr14-65112237-1
chr2	136777118	136777451	H12-Merged-chr2-136777284-1
chr2	137057663	137058192	H12-Merged-chr2-137057927-1
chr14	65545893	65546430	H12-Merged-chr14-65546161-1
chr14	66276461	66277805	H12-Merged-chr14-66277133-1
chr5	75721690	75722732	H12-Merged-chr5-75722211-1
chr5	75934616	75934848	H12-Merged-chr5-75934732-1
chrX	131768912	131769110	H12-Merged-chrX-131769011-1
chr2	232578317	232579158	H12-Merged-chr2-232578737-1
chrX	133553043	133553355	H12-Merged-chrX-133553199-1
chr14	68088955	68090879	H12-Merged-chr14-68089917-1
chr5	167646627	167646825	H12-Merged-chr5-167646726-1
chr5	76156352	76157337	H12-Merged-chr5-76156844-1
chrX	133705746	133706094	H12-Merged-chrX-133705920-1
chr2	233931796	233932019	H12-Merged-chr2-233931907-1
chr2	145137388	145137595	H12-Merged-chr2-145137491-1
chr2	145188374	145188635	H12-Merged-chr2-145188504-1
chr14	68706759	68707370	H12-Merged-chr14-68707064-1
chr2	145270970	145271690	H12-Merged-chr2-145271330-1
chr14	68836403	68837307	H12-Merged-chr14-68836855-1
chr5	170062810	170063117	H12-Merged-chr5-170062963-1
chr1	97447358	97447640	H12-Merged-chr1-97447499-1
chr15	63386130	63387141	H12-Merged-chr15-63386635-1
chr1	100007306	100007804	H12-Merged-chr1-100007555-1
chr1	203651566	203652153	H12-Merged-chr1-203651859-1
chr1	203711978	203712244	H12-Merged-chr1-203712111-1
chr8	129830014	129830227	H12-Merged-chr8-129830120-1
chr3	183167399	183167787	H12-Merged-chr3-183167593-1
chr3	183201288	183201507	H12-Merged-chr3-183201397-1
chr4	89881042	89881311	H12-Merged-chr4-89881176-1
chr8	131141202	131141401	H12-Merged-chr8-131141301-1
chr8	23078880	23079148	H12-Merged-chr8-23079014-1
chr4	90493433	90493631	H12-Merged-chr4-90493532-1
chr3	183469901	183470748	H12-Merged-chr3-183470324-1
chr3	183480132	183480334	H12-Merged-chr3-183480233-1
chr8	131268086	131268321	H12-Merged-chr8-131268203-1
chr4	90850772	90851033	H12-Merged-chr4-90850902-1
chr12	123949647	123949924	H12-Merged-chr12-123949785-1
chr4	93441635	93441857	H12-Merged-chr4-93441746-1
chr8	131321001	131321417	H12-Merged-chr8-131321209-1
chr12	124081737	124082015	H12-Merged-chr12-124081876-1
chr12	52313283	52314059	H12-Merged-chr12-52313671-1
chr3	184035304	184040588	H12-Merged-chr3-184037946-1
chr19	2166837	2171180	H12-Merged-chr19-2169008-1
chr3	184058683	184059061	H12-Merged-chr3-184058872-1
chr2	3361116	3361619	H12-Merged-chr2-3361367-1
chr4	95414565	95415359	H12-Merged-chr4-95414962-1
chr2	3509194	3510016	H12-Merged-chr2-3509605-1
chr8	25346713	25348088	H12-Merged-chr8-25347400-1
chr12	53339187	53341124	H12-Merged-chr12-53340155-1
chr2	8946087	8946888	H12-Merged-chr2-8946487-1
chr12	53749152	53749815	H12-Merged-chr12-53749483-1
chr12	125331992	125332190	H12-Merged-chr12-125332091-1
chr19	3158663	3158930	H12-Merged-chr19-3158796-1
chr6	126588161	126588370	H12-Merged-chr6-126588265-1
chr6	127621821	127622514	H12-Merged-chr6-127622167-1
chr7	34915574	34915780	H12-Merged-chr7-34915677-1
chr7	35262294	35262495	H12-Merged-chr7-35262394-1
chr3	42205449	42206243	H12-Merged-chr3-42205846-1
chr6	129454656	129455080	H12-Merged-chr6-129454868-1
chr3	42688409	42689003	H12-Merged-chr3-42688706-1
chr16	75685284	75685621	H12-Merged-chr16-75685452-1
chr7	37009336	37010126	H12-Merged-chr7-37009731-1
chr16	75713005	75713915	H12-Merged-chr16-75713460-1
chr7	37298965	37299165	H12-Merged-chr7-37299065-1
chr3	43275636	43276500	H12-Merged-chr3-43276068-1
chr6	129978736	129979512	H12-Merged-chr6-129979124-1
chr7	38358174	38358485	H12-Merged-chr7-38358329-1
chr22	24633940	24634548	H12-Merged-chr22-24634244-1
chr17	41768968	41769275	H12-Merged-chr17-41769121-1
chr3	43476151	43476674	H12-Merged-chr3-43476412-1
chr3	43495612	43496049	H12-Merged-chr3-43495830-1
chr3	43506924	43507127	H12-Merged-chr3-43507025-1
chr7	38880401	38881184	H12-Merged-chr7-38880792-1
chr22	24809924	24811791	H12-Merged-chr22-24810857-1
chr16	81373299	81373898	H12-Merged-chr16-81373598-1
chr1	11216647	11217027	H12-Merged-chr1-11216837-1
chr17	43021350	43022774	H12-Merged-chr17-43022062-1
chr1	11844843	11845259	H12-Merged-chr1-11845051-1
chr10	82311423	82312466	H12-Merged-chr10-82311944-1
chr1	12073406	12074063	H12-Merged-chr1-12073734-1
chr10	85416548	85416809	H12-Merged-chr10-85416678-1
chr10	85579128	85579365	H12-Merged-chr10-85579246-1
chr1	12509033	12509933	H12-Merged-chr1-12509483-1
chr10	85855625	85856236	H12-Merged-chr10-85855930-1
chr1	15741790	15746299	H12-Merged-chr1-15744044-1
chr1	15994389	15995283	H12-Merged-chr1-15994836-1
chr5	78102763	78102998	H12-Merged-chr5-78102880-1
chr5	170518853	170519088	H12-Merged-chr5-170518970-1
chr9	132316749	132317327	H12-Merged-chr9-132317038-1
chr2	235453849	235454170	H12-Merged-chr2-235454009-1
chr2	149017139	149017634	H12-Merged-chr2-149017386-1
chrX	135275675	135276044	H12-Merged-chrX-135275859-1
chr5	79666363	79666567	H12-Merged-chr5-79666465-1
chr5	79762748	79763312	H12-Merged-chr5-79763030-1
chr9	132474876	132475188	H12-Merged-chr9-132475032-1
chr2	150274540	150274765	H12-Merged-chr2-150274652-1
chr5	171534252	171534562	H12-Merged-chr5-171534407-1
chrX	138899464	138899900	H12-Merged-chrX-138899682-1
chr15	63745194	63745989	H12-Merged-chr15-63745591-1
chr5	81052091	81052717	H12-Merged-chr5-81052404-1
chrX	140427885	140428090	H12-Merged-chrX-140427987-1
chr9	132707836	132708034	H12-Merged-chr9-132707935-1
chr15	63809769	63810523	H12-Merged-chr15-63810146-1
chr2	151038967	151039374	H12-Merged-chr2-151039170-1
chr2	151138711	151138909	H12-Merged-chr2-151138810-1
chr15	64052154	64052370	H12-Merged-chr15-64052262-1
chr15	64110411	64110689	H12-Merged-chr15-64110550-1
chr15	64244377	64244811	H12-Merged-chr15-64244594-1
chr15	64277748	64278614	H12-Merged-chr15-64278181-1
chr2	151487329	151487529	H12-Merged-chr2-151487429-1
chrX	150041843	150042784	H12-Merged-chrX-150042313-1
chr14	70831008	70831235	H12-Merged-chr14-70831121-1
chr14	71385795	71386599	H12-Merged-chr14-71386197-1
chr15	64834269	64834944	H12-Merged-chr15-64834606-1
chr2	238490625	238490944	H12-Merged-chr2-238490784-1
chr2	153269194	153269516	H12-Merged-chr2-153269355-1
chr2	153288928	153289373	H12-Merged-chr2-153289150-1
chr1	101349850	101350697	H12-Merged-chr1-101350273-1
chr1	101387542	101387858	H12-Merged-chr1-101387700-1
chr1	101711870	101712216	H12-Merged-chr1-101712043-1
chr1	108496128	108496331	H12-Merged-chr1-108496229-1
chr1	108597859	108598092	H12-Merged-chr1-108597975-1
chr1	108600424	108600985	H12-Merged-chr1-108600704-1
chr1	109091652	109092040	H12-Merged-chr1-109091846-1
chr1	109749508	109750098	H12-Merged-chr1-109749803-1
chr1	109895044	109895996	H12-Merged-chr1-109895520-1
chr8	26026999	26028015	H12-Merged-chr8-26027507-1
chr8	26138506	26138912	H12-Merged-chr8-26138709-1
chr8	26152401	26152732	H12-Merged-chr8-26152566-1
chr8	26153572	26154741	H12-Merged-chr8-26154156-1
chr8	26165653	26165870	H12-Merged-chr8-26165761-1
chr3	185650075	185650982	H12-Merged-chr3-185650528-1
chr2	9465825	9466062	H12-Merged-chr2-9465943-1
chr4	100065304	100065544	H12-Merged-chr4-100065424-1
chr2	9606751	9607300	H12-Merged-chr2-9607025-1
chr8	135816532	135817124	H12-Merged-chr8-135816828-1
chr8	27586406	27586688	H12-Merged-chr8-27586547-1
chr12	54787633	54788428	H12-Merged-chr12-54788030-1
chr12	54800321	54800528	H12-Merged-chr12-54800424-1
chr12	132562426	132562853	H12-Merged-chr12-132562639-1
chr1	1644632	1645600	H12-Merged-chr1-1645116-1
chr3	188103119	188104101	H12-Merged-chr3-188103610-1
chr8	28842677	28843646	H12-Merged-chr8-28843161-1
chr8	28861854	28862388	H12-Merged-chr8-28862121-1
chr12	132933662	132933871	H12-Merged-chr12-132933766-1
chr12	133170371	133170596	H12-Merged-chr12-133170483-1
chr8	141594536	141594900	H12-Merged-chr8-141594718-1
chr3	188153631	188153833	H12-Merged-chr3-188153732-1
chr8	29009529	29010092	H12-Merged-chr8-29009810-1
chr12	56517750	56518011	H12-Merged-chr12-56517880-1
chr19	4474319	4474717	H12-Merged-chr19-4474518-1
chr3	188259160	188259620	H12-Merged-chr3-188259390-1
chr8	29071166	29071664	H12-Merged-chr8-29071415-1
chr2	10759271	10760996	H12-Merged-chr2-10760133-1
chr13	20256911	20257212	H12-Merged-chr13-20257061-1
chr2	10923199	10923884	H12-Merged-chr2-10923541-1
chr2	11144050	11144442	H12-Merged-chr2-11144246-1
chr3	188672229	188672465	H12-Merged-chr3-188672347-1
chr4	107000419	107001250	H12-Merged-chr4-107000834-1
chr4	107166182	107166684	H12-Merged-chr4-107166433-1
chr2	11488382	11488678	H12-Merged-chr2-11488530-1
chr12	57016615	57017161	H12-Merged-chr12-57016888-1
chr1	6021972	6022182	H12-Merged-chr1-6022077-1
chr12	57384578	57386034	H12-Merged-chr12-57385306-1
chr12	57657807	57658066	H12-Merged-chr12-57657936-1
chr13	21699328	21699630	H12-Merged-chr13-21699479-1
chr7	39733326	39734003	H12-Merged-chr7-39733664-1
chr6	132281838	132282061	H12-Merged-chr6-132281949-1
chr7	40098744	40099008	H12-Merged-chr7-40098876-1
chr7	40283996	40284208	H12-Merged-chr7-40284102-1
chr7	40440944	40441214	H12-Merged-chr7-40441079-1
chr22	25149418	25150208	H12-Merged-chr22-25149813-1
chr22	25444367	25444649	H12-Merged-chr22-25444508-1
chr7	41670611	41670814	H12-Merged-chr7-41670712-1
chr22	25514187	25518970	H12-Merged-chr22-25516578-1
chr7	42137340	42137809	H12-Merged-chr7-42137574-1
chr7	42146933	42147600	H12-Merged-chr7-42147266-1
chr3	46538064	46538516	H12-Merged-chr3-46538290-1
chr16	81956348	81956680	H12-Merged-chr16-81956514-1
chr16	82049864	82050248	H12-Merged-chr16-82050056-1
chr16	82071014	82071507	H12-Merged-chr16-82071260-1
chr7	43714742	43715047	H12-Merged-chr7-43714894-1
chr6	136406214	136406790	H12-Merged-chr6-136406502-1
chr6	136433293	136433584	H12-Merged-chr6-136433438-1
chr3	47338215	47339518	H12-Merged-chr3-47338866-1
chr16	83708699	83708943	H12-Merged-chr16-83708821-1
chr16	83800138	83800387	H12-Merged-chr16-83800262-1
chr22	27567247	27567600	H12-Merged-chr22-27567423-1
chr10	89097749	89097996	H12-Merged-chr10-89097872-1
chr17	45294409	45295281	H12-Merged-chr17-45294845-1
chr3	47935433	47935821	H12-Merged-chr3-47935627-1
chr10	89512135	89512336	H12-Merged-chr10-89512235-1
chr3	48106907	48107315	H12-Merged-chr3-48107111-1
chr3	48113937	48114390	H12-Merged-chr3-48114163-1
chr10	90870176	90870395	H12-Merged-chr10-90870285-1
chr10	92151044	92151497	H12-Merged-chr10-92151270-1
chr10	92666062	92666388	H12-Merged-chr10-92666225-1
chr1	17233856	17234447	H12-Merged-chr1-17234151-1
chr10	93347638	93347905	H12-Merged-chr10-93347771-1
chr1	18022849	18023230	H12-Merged-chr1-18023039-1
chr1	19533649	19533993	H12-Merged-chr1-19533821-1
chr5	88101503	88103136	H12-Merged-chr5-88102319-1
chr5	88119553	88119767	H12-Merged-chr5-88119660-1
chrX	153232599	153234171	H12-Merged-chrX-153233385-1
chr9	134756365	134756772	H12-Merged-chr9-134756568-1
chr9	134875357	134875765	H12-Merged-chr9-134875561-1
chr2	155818297	155819088	H12-Merged-chr2-155818692-1
chr9	135241208	135241685	H12-Merged-chr9-135241446-1
chr2	157775301	157776053	H12-Merged-chr2-157775677-1
chr5	90672434	90672671	H12-Merged-chr5-90672552-1
chr2	159070434	159071205	H12-Merged-chr2-159070819-1
chr5	92487581	92487905	H12-Merged-chr5-92487743-1
chr2	242028583	242029364	H12-Merged-chr2-242028973-1
chr2	242048291	242048770	H12-Merged-chr2-242048530-1
chr2	159484550	159484748	H12-Merged-chr2-159484649-1
chr2	159770540	159771174	H12-Merged-chr2-159770857-1
chr5	93303064	93303519	H12-Merged-chr5-93303291-1
chrX	154867038	154867342	H12-Merged-chrX-154867190-1
chr5	94384893	94385091	H12-Merged-chr5-94384992-1
chr5	94395713	94397648	H12-Merged-chr5-94396680-1
chr5	179128777	179131238	H12-Merged-chr5-179130007-1
chr5	179132712	179132910	H12-Merged-chr5-179132811-1
chr15	67535096	67535612	H12-Merged-chr15-67535354-1
chr1	110870744	110871559	H12-Merged-chr1-110871151-1
chr1	110926082	110926336	H12-Merged-chr1-110926209-1
chr1	111949209	111949499	H12-Merged-chr1-111949354-1
chr1	112041977	112042519	H12-Merged-chr1-112042248-1
chr1	112125579	112125816	H12-Merged-chr1-112125697-1
chr1	113516882	113517593	H12-Merged-chr1-113517237-1
chr1	114351269	114352767	H12-Merged-chr1-114352018-1
chr8	29635281	29635820	H12-Merged-chr8-29635550-1
chr4	108540474	108541225	H12-Merged-chr4-108540849-1
chr8	142386268	142386739	H12-Merged-chr8-142386503-1
chr3	189990315	189990768	H12-Merged-chr3-189990541-1
chr4	109481199	109482725	H12-Merged-chr4-109481962-1
chr4	109545112	109545790	H12-Merged-chr4-109545451-1
chr4	109943868	109944526	H12-Merged-chr4-109944197-1
chr3	191084736	191084934	H12-Merged-chr3-191084835-1
chr3	191510028	191510226	H12-Merged-chr3-191510127-1
chr8	30449712	30450057	H12-Merged-chr8-30449884-1
chr3	191774932	191775209	H12-Merged-chr3-191775070-1
chr4	110001145	110001358	H12-Merged-chr4-110001251-1
chr13	23956251	23956500	H12-Merged-chr13-23956375-1
chr8	144938558	144938978	H12-Merged-chr8-144938768-1
chr12	58323100	58323766	H12-Merged-chr12-58323433-1
chr12	58618650	58618884	H12-Merged-chr12-58618767-1
chr12	58619873	58620103	H12-Merged-chr12-58619988-1
chr13	24227824	24228650	H12-Merged-chr13-24228237-1
chr13	24231330	24231529	H12-Merged-chr13-24231429-1
chr8	145007628	145007885	H12-Merged-chr8-145007756-1
chr12	58739016	58739259	H12-Merged-chr12-58739137-1
chr3	193764957	193765379	H12-Merged-chr3-193765168-1
chr4	111702720	111703025	H12-Merged-chr4-111702872-1
chr12	59241615	59242429	H12-Merged-chr12-59242022-1
chr2	16852745	16853411	H12-Merged-chr2-16853078-1
chr12	59316955	59317193	H12-Merged-chr12-59317074-1
chr3	193961490	193961777	H12-Merged-chr3-193961633-1
chr11	82721048	82721767	H12-Merged-chr11-82721407-1
chr11	82767490	82767771	H12-Merged-chr11-82767630-1
chr11	82774566	82774764	H12-Merged-chr11-82774665-1
chr12	59480102	59480447	H12-Merged-chr12-59480274-1
chr13	27250879	27251795	H12-Merged-chr13-27251337-1
chr12	59854049	59854247	H12-Merged-chr12-59854148-1
chr2	20130163	20130571	H12-Merged-chr2-20130367-1
chr12	60467156	60467971	H12-Merged-chr12-60467563-1
chr12	63247963	63248958	H12-Merged-chr12-63248460-1
chr12	63253452	63253743	H12-Merged-chr12-63253597-1
chr11	86690328	86691120	H12-Merged-chr11-86690724-1
chr7	44635596	44635939	H12-Merged-chr7-44635767-1
chr7	45232013	45232586	H12-Merged-chr7-45232299-1
chr22	28443769	28444171	H12-Merged-chr22-28443970-1
chr6	138974503	138975278	H12-Merged-chr6-138974890-1
chr17	46167890	46168088	H12-Merged-chr17-46167989-1
chr7	45962517	45962846	H12-Merged-chr7-45962681-1
chr7	46284747	46285781	H12-Merged-chr7-46285264-1
chr17	46307209	46307449	H12-Merged-chr17-46307329-1
chr16	85564942	85565201	H12-Merged-chr16-85565071-1
chr16	85607828	85608026	H12-Merged-chr16-85607927-1
chr16	85609012	85609658	H12-Merged-chr16-85609335-1
chr16	86192679	86192877	H12-Merged-chr16-86192778-1
chr6	140265805	140266146	H12-Merged-chr6-140265975-1
chr6	140641951	140642657	H12-Merged-chr6-140642304-1
chr22	30331978	30332460	H12-Merged-chr22-30332219-1
chr3	50065656	50065871	H12-Merged-chr3-50065763-1
chr10	94297909	94298137	H12-Merged-chr10-94298023-1
chr10	3477993	3478233	H12-Merged-chr10-3478113-1
chr17	47900595	47901277	H12-Merged-chr17-47900936-1
chr16	87337534	87337783	H12-Merged-chr16-87337658-1
chr1	19821260	19822245	H12-Merged-chr1-19821752-1
chr10	94757244	94757587	H12-Merged-chr10-94757415-1
chr10	4412559	4412818	H12-Merged-chr10-4412688-1
chr10	4540703	4541351	H12-Merged-chr10-4541027-1
chr1	20923945	20924586	H12-Merged-chr1-20924265-1
chr1	21103077	21103797	H12-Merged-chr1-21103437-1
chr1	21197812	21198287	H12-Merged-chr1-21198049-1
chr10	96279047	96279489	H12-Merged-chr10-96279268-1
chr10	4832307	4833646	H12-Merged-chr10-4832976-1
chr10	5580101	5581290	H12-Merged-chr10-5580695-1
chr1	22029571	22030276	H12-Merged-chr1-22029923-1
chr10	5782970	5783255	H12-Merged-chr10-5783112-1
chr1	22175758	22176014	H12-Merged-chr1-22175886-1
chr1	22316042	22316264	H12-Merged-chr1-22316153-1
chrY	2582818	2583043	H12-Merged-chrY-2582930-1
chr9	138889329	138889566	H12-Merged-chr9-138889447-1
chr5	179474479	179474786	H12-Merged-chr5-179474632-1
chr5	95107116	95108071	H12-Merged-chr5-95107593-1
chrY	2811529	2811739	H12-Merged-chrY-2811634-1
chr2	160613986	160614184	H12-Merged-chr2-160614085-1
chrY	3910450	3910748	H12-Merged-chrY-3910599-1
chr5	95291911	95292293	H12-Merged-chr5-95292102-1
chrY	7582238	7582850	H12-Merged-chrY-7582544-1
chr5	95434693	95435029	H12-Merged-chr5-95434861-1
chr5	95451123	95451382	H12-Merged-chr5-95451252-1
chr5	95461134	95461637	H12-Merged-chr5-95461385-1
chr15	67772428	67772658	H12-Merged-chr15-67772543-1
chr15	67934732	67935462	H12-Merged-chr15-67935097-1
chr5	180279466	180280732	H12-Merged-chr5-180280099-1
chr20	1344625	1346276	H12-Merged-chr20-1345450-1
chr6	680501	680873	H12-Merged-chr6-680687-1
chr6	863456	863693	H12-Merged-chr6-863574-1
chr15	68967628	68967866	H12-Merged-chr15-68967747-1
chr6	1678555	1678838	H12-Merged-chr6-1678696-1
chr2	161290912	161291526	H12-Merged-chr2-161291219-1
chr5	96344725	96345544	H12-Merged-chr5-96345134-1
chr2	161952603	161953767	H12-Merged-chr2-161953185-1
chr2	161960648	161960852	H12-Merged-chr2-161960750-1
chr20	2899082	2899343	H12-Merged-chr20-2899212-1
chr5	98121007	98121254	H12-Merged-chr5-98121130-1
chr9	140702100	140702947	H12-Merged-chr9-140702523-1
chr6	2744912	2745229	H12-Merged-chr6-2745070-1
chr14	80774635	80774838	H12-Merged-chr14-80774736-1
chr14	80959957	80960255	H12-Merged-chr14-80960106-1
chr14	81088248	81088467	H12-Merged-chr14-81088357-1
chr14	81339387	81339647	H12-Merged-chr14-81339517-1
chr14	81683852	81684158	H12-Merged-chr14-81684005-1
chr1	114955812	114956027	H12-Merged-chr1-114955919-1
chr14	81983470	81984391	H12-Merged-chr14-81983930-1
chr1	116066317	116067039	H12-Merged-chr1-116066678-1
chr1	116923063	116923726	H12-Merged-chr1-116923394-1
chr1	117314924	117315465	H12-Merged-chr1-117315194-1
chr1	36043184	36043704	H12-Merged-chr1-36043444-1
chr1	36443977	36444322	H12-Merged-chr1-36444149-1
chr1	119730241	119730554	H12-Merged-chr1-119730397-1
chr1	36886444	36887066	H12-Merged-chr1-36886755-1
chr4	114756218	114756416	H12-Merged-chr4-114756317-1
chr4	114866465	114867493	H12-Merged-chr4-114866979-1
chr3	194269485	194270074	H12-Merged-chr3-194269779-1
chr3	194365838	194366336	H12-Merged-chr3-194366087-1
chr4	116947693	116949058	H12-Merged-chr4-116948375-1
chr8_gl000196_random	29369	30194	H12-Merged-chr8_gl000196_random-29781-1
chr3	194644818	194646072	H12-Merged-chr3-194645445-1
chr3	194785003	194785492	H12-Merged-chr3-194785247-1
chr12	63457656	63458468	H12-Merged-chr12-63458062-1
chr12	63696556	63696812	H12-Merged-chr12-63696684-1
chr12	63801460	63803047	H12-Merged-chr12-63802253-1
chr13	29056407	29057797	H12-Merged-chr13-29057102-1
chr9	2695315	2695573	H12-Merged-chr9-2695444-1
chr9	3223296	3223875	H12-Merged-chr9-3223585-1
chr4	121594250	121594571	H12-Merged-chr4-121594410-1
chr9	3509189	3510251	H12-Merged-chr9-3509720-1
chr12	64801344	64801626	H12-Merged-chr12-64801485-1
chr12	64817518	64818368	H12-Merged-chr12-64817943-1
chr8	38693648	38693926	H12-Merged-chr8-38693787-1
chr12	64882497	64882751	H12-Merged-chr12-64882624-1
chr12	65037178	65038876	H12-Merged-chr12-65038027-1
chr8	38943743	38944433	H12-Merged-chr8-38944088-1
chr8	38954699	38955476	H12-Merged-chr8-38955087-1
chr8	39710062	39710264	H12-Merged-chr8-39710163-1
chr2	24550273	24551184	H12-Merged-chr2-24550728-1
chr12	65094939	65095206	H12-Merged-chr12-65095072-1
chr19	11497868	11498433	H12-Merged-chr19-11498150-1
chr3	196344086	196344308	H12-Merged-chr3-196344197-1
chr3	196411596	196412158	H12-Merged-chr3-196411877-1
chr12	65753567	65754491	H12-Merged-chr12-65754029-1
chr13	32578442	32579295	H12-Merged-chr13-32578868-1
chr12	66258752	66259125	H12-Merged-chr12-66258938-1
chr11	95786071	95787022	H12-Merged-chr11-95786546-1
chr11	95788720	95789295	H12-Merged-chr11-95789007-1
chr11	95906588	95906938	H12-Merged-chr11-95906763-1
chr7	50667760	50668671	H12-Merged-chr7-50668215-1
chr7	50763232	50764332	H12-Merged-chr7-50763782-1
chr7	51139982	51142138	H12-Merged-chr7-51141060-1
chr6	143178608	143179163	H12-Merged-chr6-143178885-1
chr6	143943193	143943579	H12-Merged-chr6-143943386-1
chr16	88125401	88125863	H12-Merged-chr16-88125632-1
chr22	31900586	31900800	H12-Merged-chr22-31900693-1
chr22	32021195	32022886	H12-Merged-chr22-32022040-1
chr17	49113253	49113451	H12-Merged-chr17-49113352-1
chr17	49171428	49171628	H12-Merged-chr17-49171528-1
chr3	52501753	52503110	H12-Merged-chr3-52502431-1
chr22	32023720	32024696	H12-Merged-chr22-32024208-1
chr22	32110561	32110851	H12-Merged-chr22-32110706-1
chr16	88660996	88661195	H12-Merged-chr16-88661095-1
chr3	52716077	52716837	H12-Merged-chr3-52716457-1
chr17	53508191	53508512	H12-Merged-chr17-53508351-1
chr22	32294264	32294608	H12-Merged-chr22-32294436-1
chr22	32332440	32333203	H12-Merged-chr22-32332821-1
chr6	144560830	144561769	H12-Merged-chr6-144561299-1
chr3	53122041	53122250	H12-Merged-chr3-53122145-1
chr7	56113709	56116595	H12-Merged-chr7-56115152-1
chr6	144646391	144646607	H12-Merged-chr6-144646499-1
chr16	89377172	89378231	H12-Merged-chr16-89377701-1
chr22	33040779	33041007	H12-Merged-chr22-33040893-1
chr6	145000931	145001129	H12-Merged-chr6-145001030-1
chr10	97884356	97884746	H12-Merged-chr10-97884551-1
chr3	56648739	56649564	H12-Merged-chr3-56649151-1
chr10	98640177	98640446	H12-Merged-chr10-98640311-1
chr10	6451938	6452369	H12-Merged-chr10-6452153-1
chr10	6713929	6714356	H12-Merged-chr10-6714142-1
chr10	99238003	99238880	H12-Merged-chr10-99238441-1
chr10	99272759	99273263	H12-Merged-chr10-99273011-1
chr10	10083946	10084450	H12-Merged-chr10-10084198-1
chr10	10927103	10927760	H12-Merged-chr10-10927431-1
chr10	101650306	101650728	H12-Merged-chr10-101650517-1
chr10	12030932	12031427	H12-Merged-chr10-12031179-1
chr5	102150881	102151093	H12-Merged-chr5-102150987-1
chr2	166393576	166393942	H12-Merged-chr2-166393759-1
chr5	102598863	102599067	H12-Merged-chr5-102598965-1
chr2	167043790	167044865	H12-Merged-chr2-167044327-1
chr5	102676765	102676965	H12-Merged-chr5-102676865-1
chr2	167241552	167241889	H12-Merged-chr2-167241720-1
chrX	2807512	2807743	H12-Merged-chrX-2807627-1
chr14	85432612	85433199	H12-Merged-chr14-85432905-1
chr14	85633507	85634277	H12-Merged-chr14-85633892-1
chr5	107200173	107200715	H12-Merged-chr5-107200444-1
chr2	169661066	169661280	H12-Merged-chr2-169661173-1
chr2	171311669	171312467	H12-Merged-chr2-171312068-1
chr6	4606809	4608428	H12-Merged-chr6-4607618-1
chr6	4649691	4649917	H12-Merged-chr6-4649804-1
chr6	4906642	4907448	H12-Merged-chr6-4907045-1
chr14	91137503	91138185	H12-Merged-chr14-91137844-1
chr1	39750793	39751494	H12-Merged-chr1-39751143-1
chr1	39885623	39885929	H12-Merged-chr1-39885776-1
chr1	39907151	39908050	H12-Merged-chr1-39907600-1
chr1	39927582	39927915	H12-Merged-chr1-39927748-1
chr1	39931726	39932324	H12-Merged-chr1-39932025-1
chr1	41331862	41332089	H12-Merged-chr1-41331975-1
chr8	39769814	39770793	H12-Merged-chr8-39770303-1
chr8	41831635	41831866	H12-Merged-chr8-41831750-1
chr12	66484073	66484604	H12-Merged-chr12-66484338-1
chr8	42035375	42035610	H12-Merged-chr8-42035492-1
chr8	42122805	42125925	H12-Merged-chr8-42124365-1
chr12	69016279	69016768	H12-Merged-chr12-69016523-1
chr12	69158295	69158860	H12-Merged-chr12-69158577-1
chr11	100551743	100552013	H12-Merged-chr11-100551878-1
chr12	69464412	69464747	H12-Merged-chr12-69464579-1
chr19	14488985	14490127	H12-Merged-chr19-14489556-1
chr11	103265495	103266501	H12-Merged-chr11-103265998-1
chr11	107298310	107298604	H12-Merged-chr11-107298457-1
chr6	147384503	147385263	H12-Merged-chr6-147384883-1
chr16	89738799	89739331	H12-Merged-chr16-89739065-1
chr22	36230718	36233714	H12-Merged-chr22-36232216-1
chr6	148188673	148188916	H12-Merged-chr6-148188794-1
chr22	36503340	36503860	H12-Merged-chr22-36503600-1
chr22	36657493	36657789	H12-Merged-chr22-36657641-1
chr22	36715395	36717974	H12-Merged-chr22-36716684-1
chr22	36777562	36777892	H12-Merged-chr22-36777727-1
chr6	148713228	148713611	H12-Merged-chr6-148713419-1
chr6	149819828	149820760	H12-Merged-chr6-149820294-1
chr6	150135651	150136249	H12-Merged-chr6-150135950-1
chr6	150780181	150781099	H12-Merged-chr6-150780640-1
chr10	12093227	12093691	H12-Merged-chr10-12093459-1
chr22	37962908	37963779	H12-Merged-chr22-37963343-1
chr22	38104490	38104705	H12-Merged-chr22-38104597-1
chr10	102042054	102042697	H12-Merged-chr10-102042375-1
chr1	25068988	25069194	H12-Merged-chr1-25069091-1
chr1	25106481	25107325	H12-Merged-chr1-25106903-1
chr10	102647137	102647362	H12-Merged-chr10-102647249-1
chr1	25682601	25682909	H12-Merged-chr1-25682755-1
chr1	25987852	25988251	H12-Merged-chr1-25988051-1
chr10	104051149	104051465	H12-Merged-chr10-104051307-1
chr10	14015313	14016097	H12-Merged-chr10-14015705-1
chr10	14038437	14040036	H12-Merged-chr10-14039236-1
chr1	26311686	26312212	H12-Merged-chr1-26311949-1
chr10	14663606	14663901	H12-Merged-chr10-14663753-1
chr10	14923886	14924432	H12-Merged-chr10-14924159-1
chr1	27060354	27061031	H12-Merged-chr1-27060692-1
chr5	110789204	110789662	H12-Merged-chr5-110789433-1
chrX	10333795	10334572	H12-Merged-chrX-10334183-1
chrX	10485058	10485776	H12-Merged-chrX-10485417-1
chr5	111771804	111772303	H12-Merged-chr5-111772053-1
chr2	173090879	173091087	H12-Merged-chr2-173090983-1
chrX	11211548	11211836	H12-Merged-chrX-11211692-1
chr2	173242123	173242491	H12-Merged-chr2-173242307-1
chrX	12388691	12389524	H12-Merged-chrX-12389107-1
chr2	173254603	173254912	H12-Merged-chr2-173254757-1
chrX	13102737	13102941	H12-Merged-chrX-13102839-1
chr2	173342511	173343083	H12-Merged-chr2-173342797-1
chr5	113028631	113028875	H12-Merged-chr5-113028753-1
chrX	13170089	13170351	H12-Merged-chrX-13170220-1
chr14	92874701	92875517	H12-Merged-chr14-92875109-1
chr2	174029574	174029960	H12-Merged-chr2-174029767-1
chr5	114707599	114708427	H12-Merged-chr5-114708013-1
chr5	114757984	114759530	H12-Merged-chr5-114758757-1
chrX	13272569	13272843	H12-Merged-chrX-13272706-1
chr14	92954039	92954259	H12-Merged-chr14-92954149-1
chr14	92956547	92957089	H12-Merged-chr14-92956818-1
chr2	174435868	174436391	H12-Merged-chr2-174436129-1
chr14	93147728	93148058	H12-Merged-chr14-93147893-1
chr14	93195044	93195297	H12-Merged-chr14-93195170-1
chr5	115710203	115710524	H12-Merged-chr5-115710363-1
chr2	175498895	175499541	H12-Merged-chr2-175499218-1
chr5	115739853	115740118	H12-Merged-chr5-115739985-1
chr5	115815504	115816336	H12-Merged-chr5-115815920-1
chrX	14856403	14856601	H12-Merged-chrX-14856502-1
chr2	175646689	175646887	H12-Merged-chr2-175646788-1
chr2	175662514	175663293	H12-Merged-chr2-175662903-1
chr1	146967802	146968331	H12-Merged-chr1-146968066-1
chr1	41452577	41452796	H12-Merged-chr1-41452686-1
chr1	41489882	41492329	H12-Merged-chr1-41491105-1
chr14	95924927	95925165	H12-Merged-chr14-95925046-1
chr1	148195432	148195966	H12-Merged-chr1-148195699-1
chr1	148231715	148231997	H12-Merged-chr1-148231856-1
chr1	41711244	41711574	H12-Merged-chr1-41711409-1
chr1	41869824	41870539	H12-Merged-chr1-41870181-1
chr4	3137930	3138800	H12-Merged-chr4-3138365-1
chr8	49837666	49837932	H12-Merged-chr8-49837799-1
chr4	3195575	3196896	H12-Merged-chr4-3196235-1
chr12	76235724	76237071	H12-Merged-chr12-76236397-1
chr12	76271974	76272238	H12-Merged-chr12-76272106-1
chr12	76394214	76394412	H12-Merged-chr12-76394313-1
chr8	55164331	55164979	H12-Merged-chr8-55164655-1
chr11	108035091	108035705	H12-Merged-chr11-108035398-1
chr12	76471469	76472018	H12-Merged-chr12-76471743-1
chr12	77687803	77688020	H12-Merged-chr12-77687911-1
chr6	151029041	151029326	H12-Merged-chr6-151029183-1
chr6	151184449	151184701	H12-Merged-chr6-151184575-1
chr16	12892965	12893188	H12-Merged-chr16-12893076-1
chr17	2000542	2001549	H12-Merged-chr17-2001045-1
chr16	14281632	14281893	H12-Merged-chr16-14281762-1
chr22	38658890	38659153	H12-Merged-chr22-38659021-1
chr22	39105238	39105845	H12-Merged-chr22-39105541-1
chr17	2968581	2969733	H12-Merged-chr17-2969157-1
chr17	3141468	3142343	H12-Merged-chr17-3141905-1
chr6	153535469	153536706	H12-Merged-chr6-153536087-1
chr22	39704167	39707351	H12-Merged-chr22-39705759-1
chr22	39921476	39922179	H12-Merged-chr22-39921827-1
chr10	16802875	16803339	H12-Merged-chr10-16803107-1
chr10	16909751	16910222	H12-Merged-chr10-16909986-1
chr1	27818671	27818931	H12-Merged-chr1-27818801-1
chr10	17075719	17076570	H12-Merged-chr10-17076144-1
chr1	27899015	27899260	H12-Merged-chr1-27899137-1
chr1	28195427	28195686	H12-Merged-chr1-28195556-1
chr10	111738505	111738706	H12-Merged-chr10-111738605-1
chr10	111792042	111792251	H12-Merged-chr10-111792146-1
chr10	17698692	17699102	H12-Merged-chr10-17698897-1
chr10	17821665	17822248	H12-Merged-chr10-17821956-1
chr2	177035182	177035598	H12-Merged-chr2-177035390-1
chr5	122071922	122072231	H12-Merged-chr5-122072076-1
chr5	123734920	123735249	H12-Merged-chr5-123735084-1
chr13	107137097	107137350	H12-Merged-chr13-107137223-1
chr2	177518497	177518702	H12-Merged-chr2-177518599-1
chr5	123994353	123995135	H12-Merged-chr5-123994744-1
chr13	107357199	107358027	H12-Merged-chr13-107357613-1
chr5	10588783	10589514	H12-Merged-chr5-10589148-1
chr2	178016068	178016361	H12-Merged-chr2-178016214-1
chr2	178017830	178018035	H12-Merged-chr2-178017932-1
chr2	178101700	178102878	H12-Merged-chr2-178102289-1
chr13	108429725	108429990	H12-Merged-chr13-108429857-1
chr2	72909164	72909362	H12-Merged-chr2-72909263-1
chrX	20281626	20282067	H12-Merged-chrX-20281846-1
chr2	73279140	73279457	H12-Merged-chr2-73279298-1
chr5	126137410	126138314	H12-Merged-chr5-126137862-1
chr13	110840226	110840424	H12-Merged-chr13-110840325-1
chr5	14246749	14247150	H12-Merged-chr5-14246949-1
chrX	22003953	22004831	H12-Merged-chrX-22004392-1
chr5	14309548	14309821	H12-Merged-chr5-14309684-1
chr5	14313767	14315000	H12-Merged-chr5-14314383-1
chrX	22202470	22203555	H12-Merged-chrX-22203012-1
chr2	179987344	179987834	H12-Merged-chr2-179987589-1
chr2	180877469	180877846	H12-Merged-chr2-180877657-1
chr1	150997344	150997576	H12-Merged-chr1-150997460-1
chr14	102188334	102189079	H12-Merged-chr14-102188706-1
chr14	102197851	102198059	H12-Merged-chr14-102197955-1
chr14	102279926	102280701	H12-Merged-chr14-102280313-1
chr1	44788434	44788923	H12-Merged-chr1-44788678-1
chr14	102729338	102729715	H12-Merged-chr14-102729526-1
chr1	45426820	45427230	H12-Merged-chr1-45427025-1
chr1	45466287	45466893	H12-Merged-chr1-45466590-1
chr1	45907638	45908538	H12-Merged-chr1-45908088-1
chr1	151907950	151908336	H12-Merged-chr1-151908143-1
chr1	153597068	153597289	H12-Merged-chr1-153597178-1
chr8	55377078	55377441	H12-Merged-chr8-55377259-1
chr7	123421975	123422229	H12-Merged-chr7-123422102-1
chr7	123438232	123439029	H12-Merged-chr7-123438630-1
chr8	56888450	56888745	H12-Merged-chr8-56888597-1
chr8	56896246	56896739	H12-Merged-chr8-56896492-1
chr8	57594371	57595381	H12-Merged-chr8-57594876-1
chr19	17670007	17673961	H12-Merged-chr19-17671984-1
chr18	9069233	9070123	H12-Merged-chr18-9069678-1
chr18	9298764	9299148	H12-Merged-chr18-9298956-1
chr3	129548915	129549147	H12-Merged-chr3-129549031-1
chr12	79345500	79346012	H12-Merged-chr12-79345756-1
chr4	7929877	7930642	H12-Merged-chr4-7930259-1
chr12	3881499	3882169	H12-Merged-chr12-3881834-1
chr12	3994618	3994825	H12-Merged-chr12-3994721-1
chr18	9575949	9576242	H12-Merged-chr18-9576095-1
chr18	9619129	9619468	H12-Merged-chr18-9619298-1
chr7	127635371	127635712	H12-Merged-chr7-127635541-1
chr7	127693332	127693644	H12-Merged-chr7-127693488-1
chr19	18512554	18512959	H12-Merged-chr19-18512756-1
chr8	61094948	61096156	H12-Merged-chr8-61095552-1
chr12	5742032	5742745	H12-Merged-chr12-5742388-1
chr3	130881537	130881804	H12-Merged-chr3-130881670-1
chr7	128189719	128190564	H12-Merged-chr7-128190141-1
chr12	80131527	80131811	H12-Merged-chr12-80131669-1
chr4	10113481	10113979	H12-Merged-chr4-10113730-1
chr11	111928386	111929294	H12-Merged-chr11-111928840-1
chr12	81561239	81561668	H12-Merged-chr12-81561453-1
chr19	19469286	19469637	H12-Merged-chr19-19469461-1
chr18	10633334	10633924	H12-Merged-chr18-10633629-1
chr3	133231838	133232173	H12-Merged-chr3-133232005-1
chr12	82855802	82856000	H12-Merged-chr12-82855901-1
chr12	82880852	82881066	H12-Merged-chr12-82880959-1
chr12	6328922	6332182	H12-Merged-chr12-6330552-1
chr11	113730475	113730802	H12-Merged-chr11-113730638-1
chr12	6440467	6440785	H12-Merged-chr12-6440626-1
chr12	6753666	6754146	H12-Merged-chr12-6753906-1
chr11	116227352	116227769	H12-Merged-chr11-116227560-1
chr11	117271404	117272008	H12-Merged-chr11-117271706-1
chr6	155061330	155061539	H12-Merged-chr6-155061434-1
chr17	4431080	4431725	H12-Merged-chr17-4431402-1
chr16	16166102	16166591	H12-Merged-chr16-16166346-1
chr20	49989237	49991420	H12-Merged-chr20-49990328-1
chr17	4651192	4651798	H12-Merged-chr17-4651495-1
chr6	156600304	156600504	H12-Merged-chr6-156600404-1
chr16	19149811	19150015	H12-Merged-chr16-19149913-1
chr6	157129056	157129674	H12-Merged-chr6-157129365-1
chr17	6069804	6070252	H12-Merged-chr17-6070028-1
chr6	157367043	157367534	H12-Merged-chr6-157367288-1
chr6	45334911	45335454	H12-Merged-chr6-45335182-1
chr16	19844102	19845152	H12-Merged-chr16-19844627-1
chr6	45979219	45979755	H12-Merged-chr6-45979487-1
chr22	42481749	42482513	H12-Merged-chr22-42482131-1
chr6	46863999	46864221	H12-Merged-chr6-46864110-1
chr10	21962311	21962532	H12-Merged-chr10-21962421-1
chr10	22102727	22103590	H12-Merged-chr10-22103158-1
chr16	21496028	21496288	H12-Merged-chr16-21496158-1
chr10	22659147	22659359	H12-Merged-chr10-22659253-1
chr1	30117274	30118222	H12-Merged-chr1-30117748-1
chr10	23122453	23122703	H12-Merged-chr10-23122578-1
chr10	25007376	25008077	H12-Merged-chr10-25007726-1
chr1	32811046	32811545	H12-Merged-chr1-32811295-1
chr1	32819498	32819811	H12-Merged-chr1-32819654-1
chr5	126297434	126297632	H12-Merged-chr5-126297533-1
chr5	126320473	126320820	H12-Merged-chr5-126320646-1
chrX	22239196	22239653	H12-Merged-chrX-22239424-1
chr5	14355371	14355598	H12-Merged-chr5-14355484-1
chrX	22370079	22370510	H12-Merged-chrX-22370294-1
chr5	14419764	14420636	H12-Merged-chr5-14420200-1
chrX	22706989	22708614	H12-Merged-chrX-22707801-1
chrX	22906439	22906851	H12-Merged-chrX-22906645-1
chr5	14485086	14485308	H12-Merged-chr5-14485197-1
chr5	14603437	14603676	H12-Merged-chr5-14603556-1
chrX	23511835	23512492	H12-Merged-chrX-23512163-1
chr9	81328786	81329082	H12-Merged-chr9-81328934-1
chr5	14801664	14802629	H12-Merged-chr5-14802146-1
chrX	23811140	23811745	H12-Merged-chrX-23811442-1
chr5	127588331	127589058	H12-Merged-chr5-127588694-1
chr2	75693457	75694000	H12-Merged-chr2-75693728-1
chr2	75737451	75738111	H12-Merged-chr2-75737781-1
chrX	25876644	25876891	H12-Merged-chrX-25876767-1
chrX	26050522	26050775	H12-Merged-chrX-26050648-1
chrX	26224513	26224724	H12-Merged-chrX-26224618-1
chr2	75932907	75933509	H12-Merged-chr2-75933208-1
chr9	85495463	85495768	H12-Merged-chr9-85495615-1
chr5	129295809	129296798	H12-Merged-chr5-129296303-1
chr5	129338691	129339183	H12-Merged-chr5-129338937-1
chr2	77095085	77095296	H12-Merged-chr2-77095190-1
chrX	27319164	27319407	H12-Merged-chrX-27319285-1
chr9	86311673	86312043	H12-Merged-chr9-86311858-1
chr5	16800643	16801228	H12-Merged-chr5-16800935-1
chr2	187356748	187356988	H12-Merged-chr2-187356868-1
chr13	114149774	114150554	H12-Merged-chr13-114150164-1
chr5	16930181	16930741	H12-Merged-chr5-16930461-1
chr9	88137419	88137820	H12-Merged-chr9-88137619-1
chr5	17049708	17050960	H12-Merged-chr5-17050334-1
chr2	85605405	85605705	H12-Merged-chr2-85605555-1
chr14	104820477	104820719	H12-Merged-chr14-104820598-1
chr14	104914447	104914660	H12-Merged-chr14-104914553-1
chr2	188211594	188212077	H12-Merged-chr2-188211835-1
chr1	51883306	51884106	H12-Merged-chr1-51883706-1
chr7	129526279	129526534	H12-Merged-chr7-129526406-1
chr3	134078109	134078591	H12-Merged-chr3-134078350-1
chr4	15043992	15044220	H12-Merged-chr4-15044106-1
chr4	15508087	15508619	H12-Merged-chr4-15508353-1
chr4	15593685	15594494	H12-Merged-chr4-15594089-1
chr7	130904042	130904787	H12-Merged-chr7-130904414-1
chr7	131140465	131141347	H12-Merged-chr7-131140906-1
chr18	12692298	12692832	H12-Merged-chr18-12692565-1
chr3	136000810	136001147	H12-Merged-chr3-136000978-1
chr12	89351662	89351997	H12-Merged-chr12-89351829-1
chr19	31806981	31807731	H12-Merged-chr19-31807356-1
chr3	136575061	136575905	H12-Merged-chr3-136575483-1
chr12	89527477	89528199	H12-Merged-chr12-89527838-1
chr4	16855263	16855461	H12-Merged-chr4-16855362-1
chr8	70283411	70283861	H12-Merged-chr8-70283636-1
chr12	7114757	7116445	H12-Merged-chr12-7115601-1
chr18	13673202	13674015	H12-Merged-chr18-13673608-1
chr18	13674953	13675502	H12-Merged-chr18-13675227-1
chr3	136647608	136648047	H12-Merged-chr3-136647827-1
chr12	89793886	89794366	H12-Merged-chr12-89794126-1
chr4	16894705	16895305	H12-Merged-chr4-16895005-1
chr12	7564053	7564333	H12-Merged-chr12-7564193-1
chr12	7596625	7596823	H12-Merged-chr12-7596724-1
chr3	137891272	137891484	H12-Merged-chr3-137891378-1
chr3	137939555	137939865	H12-Merged-chr3-137939710-1
chr12	89871207	89871498	H12-Merged-chr12-89871352-1
chr19	33925970	33926208	H12-Merged-chr19-33926089-1
chr12	8115613	8115871	H12-Merged-chr12-8115742-1
chr12	90494382	90494915	H12-Merged-chr12-90494648-1
chr12	90672184	90672382	H12-Merged-chr12-90672283-1
chr12	8307835	8308033	H12-Merged-chr12-8307934-1
chr12	8813448	8813921	H12-Merged-chr12-8813684-1
chr12	90687003	90687201	H12-Merged-chr12-90687102-1
chr4	18071137	18071350	H12-Merged-chr4-18071243-1
chr3	141074882	141075261	H12-Merged-chr3-141075071-1
chr3	141160002	141160268	H12-Merged-chr3-141160135-1
chr12	91825602	91826380	H12-Merged-chr12-91825991-1
chr11	118952437	118953125	H12-Merged-chr11-118952781-1
chr12	92273465	92274402	H12-Merged-chr12-92273933-1
chr12	92435555	92435885	H12-Merged-chr12-92435720-1
chr19	35493734	35495403	H12-Merged-chr19-35494568-1
chr18	20735259	20735681	H12-Merged-chr18-20735470-1
chr12	92723632	92724364	H12-Merged-chr12-92723998-1
chr12	92732490	92733199	H12-Merged-chr12-92732844-1
chr12	92818041	92818370	H12-Merged-chr12-92818205-1
chr12	92839107	92839687	H12-Merged-chr12-92839397-1
chr11	120203783	120204750	H12-Merged-chr11-120204266-1
chr11	121911145	121911697	H12-Merged-chr11-121911421-1
chr6	158050315	158050640	H12-Merged-chr6-158050477-1
chr6	158090621	158091239	H12-Merged-chr6-158090930-1
chr6	47000727	47001420	H12-Merged-chr6-47001073-1
chr16	21527752	21528165	H12-Merged-chr16-21527958-1
chr6	158319774	158320190	H12-Merged-chr6-158319982-1
chr16	21627388	21627736	H12-Merged-chr16-21627562-1
chr6	158405489	158406870	H12-Merged-chr6-158406179-1
chr6	47408296	47408849	H12-Merged-chr6-47408572-1
chr20	56070179	56070418	H12-Merged-chr20-56070298-1
chr20	56341966	56342783	H12-Merged-chr20-56342374-1
chr6	49564524	49565257	H12-Merged-chr6-49564890-1
chr6	158939364	158939777	H12-Merged-chr6-158939570-1
chr16	23115011	23115891	H12-Merged-chr16-23115451-1
chr16	23156554	23157143	H12-Merged-chr16-23156848-1
chr6	160185670	160186081	H12-Merged-chr6-160185875-1
chr20	57475073	57475441	H12-Merged-chr20-57475257-1
chr22	46139665	46140218	H12-Merged-chr22-46139941-1
chr6	53155168	53156245	H12-Merged-chr6-53155706-1
chr17	9349846	9350186	H12-Merged-chr17-9350016-1
chr6	161908417	161909500	H12-Merged-chr6-161908958-1
chr6	162603091	162603347	H12-Merged-chr6-162603219-1
chr10	30947613	30947938	H12-Merged-chr10-30947775-1
chr10	31164217	31164621	H12-Merged-chr10-31164419-1
chr10	31174233	31174666	H12-Merged-chr10-31174449-1
chrX	33229634	33229837	H12-Merged-chrX-33229735-1
chr5	131781881	131782666	H12-Merged-chr5-131782273-1
chrX	35064756	35064964	H12-Merged-chrX-35064860-1
chr5	19240031	19240259	H12-Merged-chr5-19240145-1
chr9	90363386	90363752	H12-Merged-chr9-90363569-1
chr2	188242812	188243013	H12-Merged-chr2-188242912-1
chr2	188244693	188245522	H12-Merged-chr2-188245107-1
chr2	188249237	188249819	H12-Merged-chr2-188249528-1
chr2	188257473	188257902	H12-Merged-chr2-188257687-1
chr2	188259827	188260631	H12-Merged-chr2-188260229-1
chr9	90524282	90524596	H12-Merged-chr9-90524439-1
chr2	188276854	188277070	H12-Merged-chr2-188276962-1
chrX	38195866	38196435	H12-Merged-chrX-38196150-1
chrX	38676410	38676733	H12-Merged-chrX-38676571-1
chr5	133080369	133081192	H12-Merged-chr5-133080780-1
chr9	91754513	91754805	H12-Merged-chr9-91754659-1
chr9	91928869	91930233	H12-Merged-chr9-91929551-1
chr5	32165376	32165587	H12-Merged-chr5-32165481-1
chr5	32270889	32271243	H12-Merged-chr5-32271066-1
chr15	23133309	23133740	H12-Merged-chr15-23133524-1
chr14	22807323	22807581	H12-Merged-chr14-22807452-1
chr5	33268014	33268212	H12-Merged-chr5-33268113-1
chr9	94181605	94182320	H12-Merged-chr9-94181962-1
chr2	87842224	87842512	H12-Merged-chr2-87842368-1
chr9	95252031	95252304	H12-Merged-chr9-95252167-1
chr15	28655486	28655886	H12-Merged-chr15-28655686-1
chr9	95474331	95474553	H12-Merged-chr9-95474442-1
chr15	29057096	29057322	H12-Merged-chr15-29057209-1
chr15	29407655	29407965	H12-Merged-chr15-29407810-1
chr2	191580409	191581047	H12-Merged-chr2-191580728-1
chr2	89119004	89119589	H12-Merged-chr2-89119296-1
chr2	89130261	89130995	H12-Merged-chr2-89130628-1
chr2	89975666	89975868	H12-Merged-chr2-89975767-1
chr15	30149624	30149883	H12-Merged-chr15-30149753-1
chr15	30280708	30280910	H12-Merged-chr15-30280809-1
chr1	55349067	55350054	H12-Merged-chr1-55349560-1
chr1	56614136	56614430	H12-Merged-chr1-56614283-1
chr1	59188391	59188967	H12-Merged-chr1-59188679-1
chr8	74449664	74449877	H12-Merged-chr8-74449770-1
chr8	74983567	74983768	H12-Merged-chr8-74983667-1
chr4	19660949	19661581	H12-Merged-chr4-19661265-1
chr3	141299479	141300525	H12-Merged-chr3-141300002-1
chr7	134501317	134501515	H12-Merged-chr7-134501416-1
chr4	20840215	20840472	H12-Merged-chr4-20840343-1
chr3	141746745	141747441	H12-Merged-chr3-141747093-1
chr7	134524446	134525215	H12-Merged-chr7-134524830-1
chr3	142135782	142136455	H12-Merged-chr3-142136118-1
chr7	134560969	134561814	H12-Merged-chr7-134561391-1
chr4	21598434	21598695	H12-Merged-chr4-21598564-1
chr4	21813070	21813603	H12-Merged-chr4-21813336-1
chr3	142264941	142265184	H12-Merged-chr3-142265062-1
chr12	93150815	93151526	H12-Merged-chr12-93151170-1
chr8	81344692	81345030	H12-Merged-chr8-81344861-1
chr4	25334865	25335084	H12-Merged-chr4-25334974-1
chr12	11737639	11737927	H12-Merged-chr12-11737783-1
chr3	143594113	143595380	H12-Merged-chr3-143594746-1
chr8	82278910	82279148	H12-Merged-chr8-82279029-1
chr8	82305517	82306314	H12-Merged-chr8-82305915-1
chr8	82392697	82392998	H12-Merged-chr8-82392847-1
chr18	22146870	22147684	H12-Merged-chr18-22147277-1
chr3	144585065	144585965	H12-Merged-chr3-144585515-1
chr3	145822787	145823284	H12-Merged-chr3-145823035-1
chr3	145867712	145868437	H12-Merged-chr3-145868074-1
chr7	135633588	135633844	H12-Merged-chr7-135633716-1
chr4	26794064	26795016	H12-Merged-chr4-26794540-1
chr18	22714232	22714437	H12-Merged-chr18-22714334-1
chr18	22715457	22715726	H12-Merged-chr18-22715591-1
chr12	93854624	93855008	H12-Merged-chr12-93854816-1
chr12	93986841	93987113	H12-Merged-chr12-93986977-1
chr11	33915404	33915617	H12-Merged-chr11-33915510-1
chr4	26839835	26840406	H12-Merged-chr4-26840120-1
chr19	38681021	38681221	H12-Merged-chr19-38681121-1
chr4	29279011	29279228	H12-Merged-chr4-29279119-1
chr12	12506701	12506915	H12-Merged-chr12-12506808-1
chr3	146521734	146521932	H12-Merged-chr3-146521833-1
chr11	35340665	35341229	H12-Merged-chr11-35340947-1
chr18	23965823	23966500	H12-Merged-chr18-23966161-1
chr12	95125908	95126560	H12-Merged-chr12-95126234-1
chr19	39222366	39222635	H12-Merged-chr19-39222500-1
chr11	35783548	35783749	H12-Merged-chr11-35783648-1
chr18	25593725	25594281	H12-Merged-chr18-25594003-1
chr12	95584971	95585595	H12-Merged-chr12-95585283-1
chr11	123364185	123364398	H12-Merged-chr11-123364291-1
chr11	36513804	36514635	H12-Merged-chr11-36514219-1
chr11	42335880	42336457	H12-Merged-chr11-42336168-1
chr6	163862727	163862970	H12-Merged-chr6-163862848-1
chr6	53597077	53597277	H12-Merged-chr6-53597177-1
chr6	163953920	163954810	H12-Merged-chr6-163954365-1
chr6	164792610	164793668	H12-Merged-chr6-164793139-1
chr6	55951617	55952963	H12-Merged-chr6-55952290-1
chr6	56099720	56100122	H12-Merged-chr6-56099921-1
chr20	62312840	62315162	H12-Merged-chr20-62314001-1
chr6	166847690	166849087	H12-Merged-chr6-166848388-1
chr6	56372602	56373529	H12-Merged-chr6-56373065-1
chr6	56524650	56525057	H12-Merged-chr6-56524853-1
chr22	50556505	50559302	H12-Merged-chr22-50557903-1
chr6	166850243	166850729	H12-Merged-chr6-166850486-1
chr16	27661611	27661839	H12-Merged-chr16-27661725-1
chr6	56637522	56637960	H12-Merged-chr6-56637741-1
chr17	16876834	16877032	H12-Merged-chr17-16876933-1
chr16	28219715	28220458	H12-Merged-chr16-28220086-1
chr16	28538671	28538943	H12-Merged-chr16-28538807-1
chr21	16236911	16237303	H12-Merged-chr21-16237107-1
chr17	17079175	17079481	H12-Merged-chr17-17079328-1
chr21	16494018	16494235	H12-Merged-chr21-16494126-1
chr6	64375418	64375626	H12-Merged-chr6-64375522-1
chr3	4471348	4472092	H12-Merged-chr3-4471720-1
chr6	65420510	65420873	H12-Merged-chr6-65420691-1
chr10	31425586	31426432	H12-Merged-chr10-31426009-1
chr10	31441482	31442049	H12-Merged-chr10-31441765-1
chr3	4566343	4566565	H12-Merged-chr3-4566454-1
chr1	204062210	204062944	H12-Merged-chr1-204062577-1
chr1	204174997	204176254	H12-Merged-chr1-204175625-1
chr16	29451110	29451780	H12-Merged-chr16-29451445-1
chr1	204375242	204375801	H12-Merged-chr1-204375521-1
chr1	204450986	204451897	H12-Merged-chr1-204451441-1
chr1	205288559	205288822	H12-Merged-chr1-205288690-1
chr10	33461906	33462105	H12-Merged-chr10-33462005-1
chr1	205572413	205572720	H12-Merged-chr1-205572566-1
chr1	205585733	205586298	H12-Merged-chr1-205586015-1
chr1	205618864	205619889	H12-Merged-chr1-205619376-1
chr10	33616798	33617659	H12-Merged-chr10-33617228-1
chr10	33702120	33702634	H12-Merged-chr10-33702377-1
chr5	135440044	135440379	H12-Merged-chr5-135440211-1
chrX	41522142	41522398	H12-Merged-chrX-41522270-1
chrX	41523718	41524750	H12-Merged-chrX-41524234-1
chrX	41565167	41565583	H12-Merged-chrX-41565375-1
chrX	42838562	42838777	H12-Merged-chrX-42838669-1
chr5	34723432	34723773	H12-Merged-chr5-34723602-1
chr2	192165182	192165827	H12-Merged-chr2-192165504-1
chrX	43876890	43877532	H12-Merged-chrX-43877211-1
chr15	31301338	31301537	H12-Merged-chr15-31301437-1
chr14	24690040	24690628	H12-Merged-chr14-24690334-1
chr14	24709027	24709301	H12-Merged-chr14-24709164-1
chr5	37704673	37704890	H12-Merged-chr5-37704781-1
chr14	24816494	24816715	H12-Merged-chr14-24816604-1
chr9	98570295	98570530	H12-Merged-chr9-98570412-1
chr2	194692354	194692590	H12-Merged-chr2-194692472-1
chr15	31803987	31804635	H12-Merged-chr15-31804311-1
chr5	138188523	138189017	H12-Merged-chr5-138188770-1
chr2	197069232	197069430	H12-Merged-chr2-197069331-1
chr2	197088770	197089150	H12-Merged-chr2-197088960-1
chr14	26590309	26591229	H12-Merged-chr14-26590769-1
chr5	39113432	39113683	H12-Merged-chr5-39113557-1
chr2	197189087	197189939	H12-Merged-chr2-197189513-1
chr2	197192890	197193119	H12-Merged-chr2-197193004-1
chr2	99307441	99308402	H12-Merged-chr2-99307921-1
chr14	31560191	31560619	H12-Merged-chr14-31560405-1
chr15	35228639	35228963	H12-Merged-chr15-35228801-1
chr1	59534042	59534249	H12-Merged-chr1-59534145-1
chr1	59606955	59610228	H12-Merged-chr1-59608591-1
chr1	60174656	60175291	H12-Merged-chr1-60174973-1
chr1	60611285	60611654	H12-Merged-chr1-60611469-1
chr1	60881271	60881557	H12-Merged-chr1-60881414-1
chr1	60908286	60908522	H12-Merged-chr1-60908404-1
chr1	61575847	61576522	H12-Merged-chr1-61576184-1
chr1	61580708	61581122	H12-Merged-chr1-61580915-1
chr1	61707412	61708009	H12-Merged-chr1-61707710-1
chr7	137601829	137602127	H12-Merged-chr7-137601978-1
chr8	87426600	87426829	H12-Merged-chr8-87426714-1
chr7	137689169	137689460	H12-Merged-chr7-137689314-1
chr7	137871398	137872069	H12-Merged-chr7-137871733-1
chr8	88877686	88878219	H12-Merged-chr8-88877952-1
chr4	30725969	30726193	H12-Merged-chr4-30726081-1
chr3	148863730	148864138	H12-Merged-chr3-148863934-1
chr4	36999364	36999777	H12-Merged-chr4-36999570-1
chr4	37817620	37817886	H12-Merged-chr4-37817753-1
chr4	37835090	37835821	H12-Merged-chr4-37835455-1
chr8	91655481	91655777	H12-Merged-chr8-91655629-1
chr3	149142968	149143190	H12-Merged-chr3-149143079-1
chr8	93141531	93142260	H12-Merged-chr8-93141895-1
chr18	30542956	30543282	H12-Merged-chr18-30543119-1
chr7	140622045	140622266	H12-Merged-chr7-140622155-1
chr12	96035700	96036382	H12-Merged-chr12-96036041-1
chr18	30767839	30768225	H12-Merged-chr18-30768032-1
chr7	141396307	141397417	H12-Merged-chr7-141396862-1
chr19	40650108	40650518	H12-Merged-chr19-40650313-1
chr19	40737675	40737884	H12-Merged-chr19-40737779-1
chr8	93823506	93823833	H12-Merged-chr8-93823669-1
chr18	32102237	32102846	H12-Merged-chr18-32102541-1
chr18	32509213	32509629	H12-Merged-chr18-32509421-1
chr3	150198463	150198909	H12-Merged-chr3-150198686-1
chr3	150688499	150688703	H12-Merged-chr3-150688601-1
chr12	96622412	96622692	H12-Merged-chr12-96622552-1
chr12	96625395	96625824	H12-Merged-chr12-96625609-1
chr11	44580841	44581326	H12-Merged-chr11-44581083-1
chr11	44589450	44593695	H12-Merged-chr11-44591572-1
chr12	15906914	15907175	H12-Merged-chr12-15907044-1
chr12	16048897	16049138	H12-Merged-chr12-16049017-1
chr19	41872004	41875137	H12-Merged-chr19-41873570-1
chr18	33264489	33264711	H12-Merged-chr18-33264600-1
chr18	33273835	33274033	H12-Merged-chr18-33273934-1
chr11	45043019	45043265	H12-Merged-chr11-45043142-1
chr11	128184127	128184404	H12-Merged-chr11-128184265-1
chr11	128185536	128185779	H12-Merged-chr11-128185657-1
chr11	128245449	128246633	H12-Merged-chr11-128246041-1
chr11	128279199	128279564	H12-Merged-chr11-128279381-1
chr11	128322576	128323387	H12-Merged-chr11-128322981-1
chr11	46302457	46302877	H12-Merged-chr11-46302667-1
chr11	128425167	128426015	H12-Merged-chr11-128425591-1
chr11	128476897	128477160	H12-Merged-chr11-128477028-1
chr6	170832523	170832870	H12-Merged-chr6-170832696-1
chr3	5030714	5031619	H12-Merged-chr3-5031166-1
chr7	372874	373420	H12-Merged-chr7-373147-1
chr6	72996386	72996596	H12-Merged-chr6-72996491-1
chr3	5259929	5260363	H12-Merged-chr3-5260146-1
chr3	7202548	7202919	H12-Merged-chr3-7202733-1
chr7	514314	514542	H12-Merged-chr7-514428-1
chr3	7498441	7498639	H12-Merged-chr3-7498540-1
chr3	7588044	7588280	H12-Merged-chr3-7588162-1
chr21	24573932	24574273	H12-Merged-chr21-24574102-1
chr6	74416065	74416277	H12-Merged-chr6-74416171-1
chr6	74447489	74448185	H12-Merged-chr6-74447837-1
chr21	27130292	27131204	H12-Merged-chr21-27130748-1
chr6	75283513	75283950	H12-Merged-chr6-75283731-1
chr6	75284755	75285349	H12-Merged-chr6-75285052-1
chr16	30465978	30466180	H12-Merged-chr16-30466079-1
chr21	27380667	27381370	H12-Merged-chr21-27381018-1
chr6	76015995	76016224	H12-Merged-chr6-76016109-1
chr21	27525829	27526041	H12-Merged-chr21-27525935-1
chr6	76086007	76086566	H12-Merged-chr6-76086286-1
chr21	27895008	27895261	H12-Merged-chr21-27895134-1
chr6	76108078	76109342	H12-Merged-chr6-76108710-1
chr6	76125534	76125737	H12-Merged-chr6-76125635-1
chr1	206557419	206558191	H12-Merged-chr1-206557805-1
chr10	35308165	35308812	H12-Merged-chr10-35308488-1
chr1	206594593	206595104	H12-Merged-chr1-206594848-1
chr1	206607451	206607795	H12-Merged-chr1-206607623-1
chr21	29479457	29479948	H12-Merged-chr21-29479702-1
chr1	206823610	206823808	H12-Merged-chr1-206823709-1
chr1	207328115	207328504	H12-Merged-chr1-207328309-1
chr1	207576062	207576307	H12-Merged-chr1-207576184-1
chr10	36278189	36278877	H12-Merged-chr10-36278533-1
chr9	101831329	101831809	H12-Merged-chr9-101831569-1
chr14	32659854	32660289	H12-Merged-chr14-32660071-1
chr9	102109919	102110882	H12-Merged-chr9-102110400-1
chr2	101322577	101323707	H12-Merged-chr2-101323142-1
chrX	49022332	49025232	H12-Merged-chrX-49023782-1
chr9	102127559	102127814	H12-Merged-chr9-102127686-1
chrX	49800580	49801189	H12-Merged-chrX-49800884-1
chr9	103085281	103085649	H12-Merged-chr9-103085465-1
chr14	34644916	34647238	H12-Merged-chr14-34646077-1
chr14	34650075	34650608	H12-Merged-chr14-34650341-1
chr2	101879894	101880606	H12-Merged-chr2-101880250-1
chr14	35322398	35322916	H12-Merged-chr14-35322657-1
chr9	107668100	107668893	H12-Merged-chr9-107668496-1
chr2	102167877	102168291	H12-Merged-chr2-102168084-1
chr14	35727071	35727479	H12-Merged-chr14-35727275-1
chr14	35789675	35789936	H12-Merged-chr14-35789805-1
chr2	102385154	102385361	H12-Merged-chr2-102385257-1
chr14	36335727	36336123	H12-Merged-chr14-36335925-1
chr14	36337782	36338734	H12-Merged-chr14-36338258-1
chr1	64568197	64568487	H12-Merged-chr1-64568342-1
chr1	64979409	64980296	H12-Merged-chr1-64979852-1
chr1	64982644	64983297	H12-Merged-chr1-64982970-1
chr3	151994376	151994663	H12-Merged-chr3-151994519-1
chr7	143779029	143779227	H12-Merged-chr7-143779128-1
chr3	152068222	152068800	H12-Merged-chr3-152068511-1
chr7	148386736	148387358	H12-Merged-chr7-148387047-1
chr3	152123797	152124079	H12-Merged-chr3-152123938-1
chr18	37140855	37141921	H12-Merged-chr18-37141388-1
chr3	152131181	152132001	H12-Merged-chr3-152131591-1
chr7	148553590	148553798	H12-Merged-chr7-148553694-1
chr7	148565174	148565706	H12-Merged-chr7-148565440-1
chr18	37541377	37542060	H12-Merged-chr18-37541718-1
chr18	37549743	37550654	H12-Merged-chr18-37550198-1
chr18	37940594	37940813	H12-Merged-chr18-37940703-1
chr18	39043878	39044647	H12-Merged-chr18-39044262-1
chr18	39283610	39284329	H12-Merged-chr18-39283969-1
chr12	25034594	25034944	H12-Merged-chr12-25034769-1
chr12	25068607	25069310	H12-Merged-chr12-25068958-1
chr3	153807802	153808669	H12-Merged-chr3-153808235-1
chr12	25224023	25224603	H12-Merged-chr12-25224313-1
chr18	43386529	43386775	H12-Merged-chr18-43386652-1
chr3	153964944	153966086	H12-Merged-chr3-153965515-1
chr18	43471827	43472087	H12-Merged-chr18-43471957-1
chr11	47476061	47476320	H12-Merged-chr11-47476190-1
chr11	130504879	130505117	H12-Merged-chr11-130504998-1
chr11	47806296	47806843	H12-Merged-chr11-47806569-1
chr11	47809516	47810519	H12-Merged-chr11-47810017-1
chr11	47891160	47891759	H12-Merged-chr11-47891459-1
chr11	132007905	132008719	H12-Merged-chr11-132008312-1
chr11	134013922	134014321	H12-Merged-chr11-134014121-1
chr11	57199552	57200201	H12-Merged-chr11-57199876-1
chr6	77391852	77392131	H12-Merged-chr6-77391991-1
chr21	29953522	29954012	H12-Merged-chr21-29953767-1
chr6	79233612	79233898	H12-Merged-chr6-79233755-1
chr16	46842950	46843301	H12-Merged-chr16-46843125-1
chr21	30515377	30515590	H12-Merged-chr21-30515483-1
chr6	81044983	81045184	H12-Merged-chr6-81045083-1
chr6	81170176	81170695	H12-Merged-chr6-81170435-1
chr6	81666766	81667118	H12-Merged-chr6-81666942-1
chr6	82691382	82691777	H12-Merged-chr6-82691579-1
chr6	83761046	83761673	H12-Merged-chr6-83761359-1
chr10	44471347	44471590	H12-Merged-chr10-44471468-1
chr16	51576335	51577288	H12-Merged-chr16-51576811-1
chr1	210036769	210037059	H12-Merged-chr1-210036914-1
chr10	47239190	47239920	H12-Merged-chr10-47239555-1
chr10	49573192	49573408	H12-Merged-chr10-49573300-1
chr1	211984397	211984655	H12-Merged-chr1-211984526-1
chr10	51046340	51046596	H12-Merged-chr10-51046468-1
chr1	212817654	212818251	H12-Merged-chr1-212817952-1
chr9	108400154	108400875	H12-Merged-chr9-108400514-1
chr9	109630839	109631394	H12-Merged-chr9-109631116-1
chr2	102432411	102432877	H12-Merged-chr2-102432644-1
chr2	102463018	102463945	H12-Merged-chr2-102463481-1
chr14	37671779	37672276	H12-Merged-chr14-37672027-1
chr14	38087557	38088177	H12-Merged-chr14-38087867-1
chr5	54185505	54186284	H12-Merged-chr5-54185894-1
chr5	54255298	54255920	H12-Merged-chr5-54255609-1
chr9	111719506	111719704	H12-Merged-chr9-111719605-1
chr14	38805510	38806060	H12-Merged-chr14-38805785-1
chr14	38870819	38871029	H12-Merged-chr14-38870924-1
chr14	38888882	38889128	H12-Merged-chr14-38889005-1
chr14	39337676	39338303	H12-Merged-chr14-39337989-1
chr5	54688679	54688929	H12-Merged-chr5-54688804-1
chr5	55262864	55263062	H12-Merged-chr5-55262963-1
chr5	55269144	55269485	H12-Merged-chr5-55269314-1
chr5	55293389	55293649	H12-Merged-chr5-55293519-1
chr2	109176560	109176845	H12-Merged-chr2-109176702-1
chr9	112916066	112916686	H12-Merged-chr9-112916376-1
chr14	50406917	50407209	H12-Merged-chr14-50407063-1
chr14	50485432	50485688	H12-Merged-chr14-50485560-1
chr1	68128544	68129242	H12-Merged-chr1-68128893-1
chr1	68284300	68284561	H12-Merged-chr1-68284430-1
chr1	69071074	69071339	H12-Merged-chr1-69071206-1
chr1	70077289	70077592	H12-Merged-chr1-70077440-1
chr1	71777987	71778199	H12-Merged-chr1-71778093-1
chr1	72636661	72636896	H12-Merged-chr1-72636778-1
chr7	150063128	150063481	H12-Merged-chr7-150063304-1
chr7	150321620	150322376	H12-Merged-chr7-150321998-1
chr7	150799514	150800441	H12-Merged-chr7-150799977-1
chr3	156419565	156421370	H12-Merged-chr3-156420467-1
chr7	151187095	151187293	H12-Merged-chr7-151187194-1
chr7	151205126	151205595	H12-Merged-chr7-151205360-1
chr3	156746145	156746465	H12-Merged-chr3-156746305-1
chr3	157102690	157103013	H12-Merged-chr3-157102851-1
chr12	27345234	27345929	H12-Merged-chr12-27345581-1
chr12	27346933	27347178	H12-Merged-chr12-27347055-1
chr12	27447838	27448609	H12-Merged-chr12-27448223-1
chr7	155077954	155078214	H12-Merged-chr7-155078084-1
chr18	51651363	51651870	H12-Merged-chr18-51651616-1
chr12	611866	612624	H12-Merged-chr12-612245-1
chr3	158881523	158882106	H12-Merged-chr3-158881814-1
chr12	808809	809521	H12-Merged-chr12-809165-1
chr11	58993720	58993967	H12-Merged-chr11-58993843-1
chr12	1457824	1458242	H12-Merged-chr12-1458033-1
chr18	53060360	53060634	H12-Merged-chr18-53060497-1
chr18	53155780	53155978	H12-Merged-chr18-53155879-1
chr12	1849555	1850185	H12-Merged-chr12-1849870-1
chr12	30975381	30975681	H12-Merged-chr12-30975531-1
chr11	61126784	61127356	H12-Merged-chr11-61127070-1
chr12	3324317	3324847	H12-Merged-chr12-3324582-1
chr11	61365981	61366661	H12-Merged-chr11-61366321-1
chr6	86064732	86065235	H12-Merged-chr6-86064983-1
chr20	4095000	4096028	H12-Merged-chr20-4095514-1
chr16	53290095	53290514	H12-Merged-chr16-53290304-1
chr21	35130764	35131243	H12-Merged-chr21-35131003-1
chr20	4243482	4244217	H12-Merged-chr20-4243849-1
chr16	53648253	53648451	H12-Merged-chr16-53648352-1
chr16	53926681	53927333	H12-Merged-chr16-53927007-1
chr21	35501636	35502256	H12-Merged-chr21-35501946-1
chr6	88211389	88211908	H12-Merged-chr6-88211648-1
chr20	4838028	4838226	H12-Merged-chr20-4838127-1
chr6	90045987	90046731	H12-Merged-chr6-90046359-1
chr15	72075174	72075376	H12-Merged-chr15-72075275-1
chr6	90074461	90075176	H12-Merged-chr6-90074818-1
chr6	90077702	90078495	H12-Merged-chr6-90078098-1
chr6	90399552	90400102	H12-Merged-chr6-90399827-1
chr15	72099046	72099611	H12-Merged-chr15-72099328-1
chr20	5156177	5156548	H12-Merged-chr20-5156362-1
chr15	73885788	73886319	H12-Merged-chr15-73886053-1
chr15	73981141	73982245	H12-Merged-chr15-73981693-1
chr21	38172459	38172706	H12-Merged-chr21-38172582-1
chr6	93247041	93247306	H12-Merged-chr6-93247173-1
chr10	53144313	53144511	H12-Merged-chr10-53144412-1
chr1	214511157	214512493	H12-Merged-chr1-214511825-1
chr21	38518966	38519421	H12-Merged-chr21-38519193-1
chr10	53976012	53976987	H12-Merged-chr10-53976499-1
chr10	54147749	54148582	H12-Merged-chr10-54148165-1
chr1	214565914	214567339	H12-Merged-chr1-214566626-1
chr16	57456677	57457429	H12-Merged-chr16-57457053-1
chr21	38866722	38866986	H12-Merged-chr21-38866854-1
chr10	61659403	61659663	H12-Merged-chr10-61659533-1
chr10	61935020	61935411	H12-Merged-chr10-61935215-1
chr10	63157364	63157806	H12-Merged-chr10-63157585-1
chr10	63247387	63247768	H12-Merged-chr10-63247577-1
chr9	114398120	114398528	H12-Merged-chr9-114398324-1
chr4	124300234	124301008	H12-Merged-chr4-124300621-1
chr5	55914716	55915627	H12-Merged-chr5-55915171-1
chr9	114679001	114679251	H12-Merged-chr9-114679126-1
chr2	109873979	109874177	H12-Merged-chr2-109874078-1
chr5	56363394	56363932	H12-Merged-chr5-56363663-1
chr4	124708407	124708895	H12-Merged-chr4-124708651-1
chr4	124775864	124776530	H12-Merged-chr4-124776197-1
chr4	124824939	124825897	H12-Merged-chr4-124825418-1
chr5	56963658	56963977	H12-Merged-chr5-56963817-1
chr13	33578702	33579063	H12-Merged-chr13-33578882-1
chr5	57079077	57080123	H12-Merged-chr5-57079600-1
chr5	57142221	57142965	H12-Merged-chr5-57142593-1
chr5	57183523	57184337	H12-Merged-chr5-57183930-1
chr2	26653018	26653355	H12-Merged-chr2-26653186-1
chr4	125133771	125134226	H12-Merged-chr4-125133998-1
chr4	125322927	125323692	H12-Merged-chr4-125323309-1
chr9	6495491	6495767	H12-Merged-chr9-6495629-1
chr14	51253711	51253929	H12-Merged-chr14-51253820-1
chr5	57389633	57390444	H12-Merged-chr5-57390038-1
chr5	57423053	57423683	H12-Merged-chr5-57423368-1
chr5	57432334	57432550	H12-Merged-chr5-57432442-1
chr5	57453120	57453344	H12-Merged-chr5-57453232-1
chr13	33942103	33942349	H12-Merged-chr13-33942226-1
chr13	33983033	33983869	H12-Merged-chr13-33983451-1
chr4	125625545	125626033	H12-Merged-chr4-125625789-1
chr9	116178294	116178847	H12-Merged-chr9-116178570-1
chr9	7121416	7122227	H12-Merged-chr9-7121821-1
chr14	51896986	51897827	H12-Merged-chr14-51897406-1
chr9	12735258	12736655	H12-Merged-chr9-12735956-1
chr14	51921045	51921425	H12-Merged-chr14-51921235-1
chr13	34987510	34987822	H12-Merged-chr13-34987666-1
chr13	35968248	35968464	H12-Merged-chr13-35968356-1
chr9	116368353	116369289	H12-Merged-chr9-116368821-1
chr9	116387366	116387724	H12-Merged-chr9-116387545-1
chr4	127138228	127138463	H12-Merged-chr4-127138345-1
chr2	28098213	28098697	H12-Merged-chr2-28098455-1
chr13	37912837	37913053	H12-Merged-chr13-37912945-1
chr13	37933675	37933947	H12-Merged-chr13-37933811-1
chr2	28212062	28212270	H12-Merged-chr2-28212166-1
chr14	53328607	53329309	H12-Merged-chr14-53328958-1
chr13	39555098	39555296	H12-Merged-chr13-39555197-1
chr1	76747073	76747606	H12-Merged-chr1-76747339-1
chr1	76750563	76751872	H12-Merged-chr1-76751217-1
chr14	53799838	53800526	H12-Merged-chr14-53800182-1
chr1	78436534	78436897	H12-Merged-chr1-78436715-1
chr1	80181725	80181931	H12-Merged-chr1-80181828-1
chr1	82106150	82106570	H12-Merged-chr1-82106360-1
chr7	156583860	156584180	H12-Merged-chr7-156584020-1
chr7	157000964	157001720	H12-Merged-chr7-157001342-1
chr7	157003777	157004626	H12-Merged-chr7-157004201-1
chr3	159524401	159525742	H12-Merged-chr3-159525071-1
chr18	53402466	53402967	H12-Merged-chr18-53402716-1
chr17	56416593	56417014	H12-Merged-chr17-56416803-1
chr18	53528479	53528984	H12-Merged-chr18-53528731-1
chr3	160946962	160947586	H12-Merged-chr3-160947274-1
chr12	31265789	31266071	H12-Merged-chr12-31265930-1
chr12	31427569	31428704	H12-Merged-chr12-31428136-1
chr18	53878531	53878749	H12-Merged-chr18-53878640-1
chr18	53966641	53966925	H12-Merged-chr18-53966783-1
chr17	57072431	57073076	H12-Merged-chr17-57072753-1
chr18	54232435	54233444	H12-Merged-chr18-54232939-1
chr17	57360524	57361804	H12-Merged-chr17-57361164-1
chr3	58108467	58108691	H12-Merged-chr3-58108579-1
chr7	72529490	72529988	H12-Merged-chr7-72529739-1
chr12	31925358	31925558	H12-Merged-chr12-31925458-1
chr12	31966298	31966864	H12-Merged-chr12-31966581-1
chr18	54338891	54339256	H12-Merged-chr18-54339073-1
chr12	32032876	32033521	H12-Merged-chr12-32033198-1
chr3	168810833	168812566	H12-Merged-chr3-168811699-1
chr18	54671220	54671760	H12-Merged-chr18-54671490-1
chr3	168840293	168840518	H12-Merged-chr3-168840405-1
chr3	168852196	168852468	H12-Merged-chr3-168852332-1
chr17	57391706	57392669	H12-Merged-chr17-57392187-1
chr3	58202660	58203304	H12-Merged-chr3-58202982-1
chr17	57490077	57491304	H12-Merged-chr17-57490690-1
chr7	72737715	72738523	H12-Merged-chr7-72738119-1
chr3	168982754	168983140	H12-Merged-chr3-168982947-1
chr8	6494678	6495017	H12-Merged-chr8-6494847-1
chr8	6575967	6576193	H12-Merged-chr8-6576080-1
chr17	57763093	57763895	H12-Merged-chr17-57763494-1
chr18	55418542	55419661	H12-Merged-chr18-55419101-1
chr18	55491798	55492006	H12-Merged-chr18-55491902-1
chr17	57826912	57827192	H12-Merged-chr17-57827052-1
chr12	32647827	32648177	H12-Merged-chr12-32648002-1
chr3	61904365	61904858	H12-Merged-chr3-61904611-1
chr12	32732175	32732522	H12-Merged-chr12-32732348-1
chr18	55867606	55868056	H12-Merged-chr18-55867831-1
chr12	32819596	32820025	H12-Merged-chr12-32819810-1
chr12	32876318	32877302	H12-Merged-chr12-32876810-1
chr12	34147426	34148668	H12-Merged-chr12-34148047-1
chr11	62977377	62978067	H12-Merged-chr11-62977722-1
chr12	41393273	41393656	H12-Merged-chr12-41393464-1
chr12	41909583	41910099	H12-Merged-chr12-41909841-1
chr6	4984887	4985453	H12-Merged-chr6-4985170-1
chr20	7716378	7716655	H12-Merged-chr20-7716516-1
chr16	57544281	57544631	H12-Merged-chr16-57544456-1
chr16	57841899	57842501	H12-Merged-chr16-57842200-1
chr20	8233278	8233476	H12-Merged-chr20-8233377-1
chr20	8245497	8246065	H12-Merged-chr20-8245781-1
chr21	39784748	39785042	H12-Merged-chr21-39784895-1
chr20	9073986	9074484	H12-Merged-chr20-9074235-1
chr20	9261246	9261487	H12-Merged-chr20-9261366-1
chr16	58618840	58619078	H12-Merged-chr16-58618959-1
chr15	75718521	75718988	H12-Merged-chr15-75718754-1
chr6	105892889	105894501	H12-Merged-chr6-105893695-1
chr16	59099632	59099846	H12-Merged-chr16-59099739-1
chr16	59427976	59428199	H12-Merged-chr16-59428087-1
chr15	76023939	76024392	H12-Merged-chr15-76024165-1
chr21	40383364	40383562	H12-Merged-chr21-40383463-1
chr6	106673837	106674079	H12-Merged-chr6-106673958-1
chr6	106757197	106758163	H12-Merged-chr6-106757680-1
chr6	7785933	7786504	H12-Merged-chr6-7786218-1
chr6	7804247	7804775	H12-Merged-chr6-7804511-1
chr15	76509748	76510334	H12-Merged-chr15-76510041-1
chr21	40568908	40569168	H12-Merged-chr21-40569038-1
chr15	77010726	77010960	H12-Merged-chr15-77010843-1
chr20	11041179	11041546	H12-Merged-chr20-11041362-1
chr16	66414740	66420251	H12-Merged-chr16-66417495-1
chr1	223296529	223297051	H12-Merged-chr1-223296790-1
chr1	223799462	223800374	H12-Merged-chr1-223799918-1
chr1	223906094	223906429	H12-Merged-chr1-223906261-1
chr1	224254722	224255435	H12-Merged-chr1-224255078-1
chr1	224427887	224428775	H12-Merged-chr1-224428331-1
chr1	224487143	224487415	H12-Merged-chr1-224487279-1
chr9	13212465	13212898	H12-Merged-chr9-13212681-1
chr5	58883506	58883704	H12-Merged-chr5-58883605-1
chr4	129051176	129052269	H12-Merged-chr4-129051722-1
chr9	116809617	116809855	H12-Merged-chr9-116809736-1
chr9	13684875	13685110	H12-Merged-chr9-13684992-1
chr9	13787378	13787708	H12-Merged-chr9-13787543-1
chr5	59973441	59974103	H12-Merged-chr5-59973772-1
chr9	117247175	117247758	H12-Merged-chr9-117247466-1
chr5	60478290	60478493	H12-Merged-chr5-60478391-1
chr5	60565474	60565970	H12-Merged-chr5-60565722-1
chr9	14151273	14152419	H12-Merged-chr9-14151846-1
chr2	112703286	112703730	H12-Merged-chr2-112703508-1
chr9	117624208	117624924	H12-Merged-chr9-117624566-1
chr4	129876961	129877161	H12-Merged-chr4-129877061-1
chr9	120439773	120439992	H12-Merged-chr9-120439882-1
chr2	112737422	112737646	H12-Merged-chr2-112737534-1
chr5	61807718	61808120	H12-Merged-chr5-61807919-1
chr13	40650656	40650918	H12-Merged-chr13-40650787-1
chr9	121295230	121296228	H12-Merged-chr9-121295729-1
chr2	28977961	28978712	H12-Merged-chr2-28978336-1
chr9	123319465	123319710	H12-Merged-chr9-123319587-1
chr4	136623134	136623698	H12-Merged-chr4-136623416-1
chr2	112952182	112952612	H12-Merged-chr2-112952397-1
chr2	30360040	30360447	H12-Merged-chr2-30360243-1
chr9	123635170	123635874	H12-Merged-chr9-123635522-1
chr9	14691125	14691438	H12-Merged-chr9-14691281-1
chr14	54815622	54816031	H12-Merged-chr14-54815826-1
chr5	64369020	64369912	H12-Merged-chr5-64369466-1
chr9	123688283	123688939	H12-Merged-chr9-123688611-1
chr2	30585070	30585657	H12-Merged-chr2-30585363-1
chr2	30589114	30589794	H12-Merged-chr2-30589454-1
chr9	15211756	15211963	H12-Merged-chr9-15211859-1
chr2	31500369	31500632	H12-Merged-chr2-31500500-1
chr2	31542372	31543114	H12-Merged-chr2-31542743-1
chr2	31554787	31555405	H12-Merged-chr2-31555096-1
chr2	113939225	113939470	H12-Merged-chr2-113939347-1
chr5	64959727	64959949	H12-Merged-chr5-64959838-1
chr5	65073970	65074395	H12-Merged-chr5-65074182-1
chr5	65110969	65111519	H12-Merged-chr5-65111244-1
chr2	32450635	32450949	H12-Merged-chr2-32450792-1
chr9	124137612	124137810	H12-Merged-chr9-124137711-1
chr13	41888737	41889428	H12-Merged-chr13-41889082-1
chr13	42142246	42143561	H12-Merged-chr13-42142903-1
chr13	42167183	42167943	H12-Merged-chr13-42167563-1
chr13	42171841	42172902	H12-Merged-chr13-42172371-1
chr2	33020816	33021020	H12-Merged-chr2-33020918-1
chr2	33218331	33219250	H12-Merged-chr2-33218790-1
chr13	42227796	42228019	H12-Merged-chr13-42227907-1
chr13	42249441	42250071	H12-Merged-chr13-42249756-1
chr13	42397807	42398455	H12-Merged-chr13-42398131-1
chr13	42408743	42409103	H12-Merged-chr13-42408923-1
chr13	42596685	42596907	H12-Merged-chr13-42596796-1
chr8	8057138	8057980	H12-Merged-chr8-8057559-1
chr7	73670868	73671202	H12-Merged-chr7-73671035-1
chr3	169335528	169335730	H12-Merged-chr3-169335629-1
chr3	62135544	62135812	H12-Merged-chr3-62135678-1
chr7	74115173	74115923	H12-Merged-chr7-74115548-1
chr3	170040391	170040729	H12-Merged-chr3-170040560-1
chr3	170090080	170090284	H12-Merged-chr3-170090182-1
chr3	170101517	170102028	H12-Merged-chr3-170101772-1
chr17	58821309	58821588	H12-Merged-chr17-58821448-1
chr18	56612713	56613244	H12-Merged-chr18-56612978-1
chr18	56620877	56621204	H12-Merged-chr18-56621040-1
chr18	56675557	56676215	H12-Merged-chr18-56675886-1
chr3	170142492	170144354	H12-Merged-chr3-170143423-1
chr3	170224426	170225228	H12-Merged-chr3-170224827-1
chr12	42297079	42297388	H12-Merged-chr12-42297233-1
chr18	57544907	57545424	H12-Merged-chr18-57545165-1
chr12	42518768	42519041	H12-Merged-chr12-42518904-1
chr8	9247990	9248376	H12-Merged-chr8-9248183-1
chr12	42606843	42607041	H12-Merged-chr12-42606942-1
chr8	10128216	10128837	H12-Merged-chr8-10128526-1
chr3	65119070	65120085	H12-Merged-chr3-65119577-1
chr17	61042959	61043481	H12-Merged-chr17-61043220-1
chr12	42928425	42929018	H12-Merged-chr12-42928721-1
chr12	42951758	42953261	H12-Merged-chr12-42952509-1
chr18	59219037	59219910	H12-Merged-chr18-59219473-1
chr17	61383196	61383408	H12-Merged-chr17-61383302-1
chr3	65867196	65867962	H12-Merged-chr3-65867579-1
chr3	65911122	65911524	H12-Merged-chr3-65911323-1
chr17	61575885	61576526	H12-Merged-chr17-61576205-1
chr7	75920158	75924975	H12-Merged-chr7-75922566-1
chr12	43083476	43083705	H12-Merged-chr12-43083590-1
chr3	171550439	171550758	H12-Merged-chr3-171550598-1
chr3	171764188	171764441	H12-Merged-chr3-171764314-1
chr17	62072648	62073002	H12-Merged-chr17-62072825-1
chr17	62163080	62163371	H12-Merged-chr17-62163225-1
chr12	44142706	44142904	H12-Merged-chr12-44142805-1
chr12	45720323	45720562	H12-Merged-chr12-45720442-1
chr18	60291937	60292570	H12-Merged-chr18-60292253-1
chr12	45721633	45722149	H12-Merged-chr12-45721891-1
chr18	60435207	60435641	H12-Merged-chr18-60435424-1
chr12	45762765	45763916	H12-Merged-chr12-45763340-1
[truncated: 55,189 more rows]

## Sheet: PE
chr	start	end	peak
chr6	53664672	53665636	H0-Merged-chr6-53665154-1
chr9	101573380	101573774	H0-Merged-chr9-101573577-1
chr12	27536421	27536647	H0-Merged-chr12-27536534-1
chr6	55847944	55848346	H0-Merged-chr6-55848145-1
chr3	128970713	128971308	H0-Merged-chr3-128971010-1
chr12	27690088	27690756	H0-Merged-chr12-27690422-1
chr16	57017420	57017999	H0-Merged-chr16-57017709-1
chr2	75770758	75770943	H0-Merged-chr2-75770850-1
chr2	75778602	75778787	H0-Merged-chr2-75778694-1
chr16	57131192	57131590	H0-Merged-chr16-57131391-1
chr2	82828983	82829287	H0-Merged-chr2-82829135-1
chr3	129142680	129143044	H0-Merged-chr3-129142862-1
chr2	83314173	83314785	H0-Merged-chr2-83314479-1
chr16	57283373	57283764	H0-Merged-chr16-57283568-1
chr2	85118845	85119363	H0-Merged-chr2-85119104-1
chr2	85170016	85170599	H0-Merged-chr2-85170307-1
chr12	29219033	29219294	H0-Merged-chr12-29219163-1
chr2	85369827	85370024	H0-Merged-chr2-85369925-1
chr2	85372689	85372905	H0-Merged-chr2-85372797-1
chr8	49549892	49550077	H0-Merged-chr8-49549984-1
chr8	49559123	49559308	H0-Merged-chr8-49559215-1
chr8	49565376	49565841	H0-Merged-chr8-49565608-1
chr8	52771425	52771661	H0-Merged-chr8-52771543-1
chr22	36383684	36383897	H0-Merged-chr22-36383790-1
chr22	36419932	36420550	H0-Merged-chr22-36420241-1
chr5	126354255	126354440	H0-Merged-chr5-126354347-1
chr5	126374224	126374464	H0-Merged-chr5-126374344-1
chr8	53058667	53058899	H0-Merged-chr8-53058783-1
chr19	17836065	17836412	H0-Merged-chr19-17836238-1
chr19	17841370	17842571	H0-Merged-chr19-17841970-1
chr22	36578119	36578458	H0-Merged-chr22-36578288-1
chr19	17895069	17895341	H0-Merged-chr19-17895205-1
chr19	17941447	17942238	H0-Merged-chr19-17941842-1
chr22	36603964	36604593	H0-Merged-chr22-36604278-1
chr10	33463660	33463848	H0-Merged-chr10-33463754-1
chr15	39643024	39643354	H0-Merged-chr15-39643189-1
chr1	229119184	229119369	H0-Merged-chr1-229119276-1
chr1	229203848	229204558	H0-Merged-chr1-229204203-1
chr11	33655918	33656199	H0-Merged-chr11-33656058-1
chr19	18287435	18288220	H0-Merged-chr19-18287827-1
chr22	36942247	36942806	H0-Merged-chr22-36942526-1
chr1	229723460	229723865	H0-Merged-chr1-229723662-1
chr15	39936579	39937577	H0-Merged-chr15-39937078-1
chr22	37252190	37252820	H0-Merged-chr22-37252505-1
chr1	230278380	230278685	H0-Merged-chr1-230278532-1
chr5	129007672	129008222	H0-Merged-chr5-129007947-1
chr10	33644255	33644634	H0-Merged-chr10-33644444-1
chr15	39977001	39977198	H0-Merged-chr15-39977099-1
chr15	40084594	40084779	H0-Merged-chr15-40084686-1
chr22	37314970	37315596	H0-Merged-chr22-37315283-1
chr1	230281435	230282142	H0-Merged-chr1-230281788-1
chr5	129337973	129338252	H0-Merged-chr5-129338112-1
chr10	34391392	34391585	H0-Merged-chr10-34391488-1
chr11	34008831	34009120	H0-Merged-chr11-34008975-1
chr11	34080861	34081055	H0-Merged-chr11-34080958-1
chr15	40204493	40204778	H0-Merged-chr15-40204635-1
chr5	130865636	130865835	H0-Merged-chr5-130865735-1
chr10	34915197	34915863	H0-Merged-chr10-34915530-1
chr11	34607587	34608235	H0-Merged-chr11-34607911-1
chr11	34810798	34811304	H0-Merged-chr11-34811051-1
chr19	18707834	18708064	H0-Merged-chr19-18707949-1
chr11	35090848	35091187	H0-Merged-chr11-35091017-1
chr1	231330526	231331078	H0-Merged-chr1-231330802-1
chr11	35644534	35645318	H0-Merged-chr11-35644926-1
chr11	35704315	35704536	H0-Merged-chr11-35704425-1
chr11	35736804	35737399	H0-Merged-chr11-35737101-1
chr7	65227117	65227400	H0-Merged-chr7-65227258-1
chr7	65336008	65336277	H0-Merged-chr7-65336142-1
chr7	65361018	65361758	H0-Merged-chr7-65361388-1
chr7	65576019	65576431	H0-Merged-chr7-65576225-1
chr20	515194	515509	H0-Merged-chr20-515351-1
chr4	108663648	108663964	H0-Merged-chr4-108663806-1
chr7	65866066	65866429	H0-Merged-chr7-65866247-1
chr20	648364	648606	H0-Merged-chr20-648485-1
chr17	57418994	57420450	H0-Merged-chr17-57419722-1
chr17	57421575	57422390	H0-Merged-chr17-57421982-1
chr20	1193603	1193955	H0-Merged-chr20-1193779-1
chr20	1338717	1339007	H0-Merged-chr20-1338862-1
chr4	110566942	110567548	H0-Merged-chr4-110567245-1
chr7	66691368	66691754	H0-Merged-chr7-66691561-1
chr1	154400226	154400447	H0-Merged-chr1-154400336-1
chr20	1377482	1383187	H0-Merged-chr20-1380334-1
chr4	110992704	110993212	H0-Merged-chr4-110992958-1
chr4	110994372	110994906	H0-Merged-chr4-110994639-1
chr1	77939535	77939736	H0-Merged-chr1-77939635-1
chr13	46913514	46913701	H0-Merged-chr13-46913607-1
chr4	111539215	111539712	H0-Merged-chr4-111539463-1
chr1	154686741	154686980	H0-Merged-chr1-154686860-1
chr13	47151316	47151565	H0-Merged-chr13-47151440-1
chr1	78073355	78073540	H0-Merged-chr1-78073447-1
chr1	78138980	78139259	H0-Merged-chr1-78139119-1
chr1	78227359	78227554	H0-Merged-chr1-78227456-1
chr1	154832692	154833195	H0-Merged-chr1-154832943-1
chr13	47273050	47273482	H0-Merged-chr13-47273266-1
chr17	58116592	58117308	H0-Merged-chr17-58116950-1
chr1	78439726	78440139	H0-Merged-chr1-78439932-1
chr1	78452603	78452788	H0-Merged-chr1-78452695-1
chr1	154925188	154925896	H0-Merged-chr1-154925542-1
chr17	58265374	58265585	H0-Merged-chr17-58265479-1
chr1	154991514	154991842	H0-Merged-chr1-154991678-1
chr12	116916148	116916448	H0-Merged-chr12-116916298-1
chr1	78571800	78572552	H0-Merged-chr1-78572176-1
chr1	78585052	78585737	H0-Merged-chr1-78585394-1
chr1	155038811	155039319	H0-Merged-chr1-155039065-1
chr1	155046281	155046963	H0-Merged-chr1-155046622-1
chr13	48815318	48815561	H0-Merged-chr13-48815439-1
chr17	58595654	58595962	H0-Merged-chr17-58595808-1
chr12	117085783	117086026	H0-Merged-chr12-117085904-1
chr1	79306307	79306668	H0-Merged-chr1-79306487-1
chr1	79487719	79487915	H0-Merged-chr1-79487817-1
chr1	82426286	82426739	H0-Merged-chr1-82426512-1
chr1	82858738	82858923	H0-Merged-chr1-82858830-1
chr9	102851503	102851833	H0-Merged-chr9-102851668-1
chr9	103359377	103359803	H0-Merged-chr9-103359590-1
chr9	103360584	103360839	H0-Merged-chr9-103360711-1
chr6	56642167	56642690	H0-Merged-chr6-56642428-1
chr6	56651352	56651642	H0-Merged-chr6-56651497-1
chr9	107625898	107626198	H0-Merged-chr9-107626048-1
chr3	129466544	129467044	H0-Merged-chr3-129466794-1
chr3	129527127	129527900	H0-Merged-chr3-129527513-1
chr6	56961647	56961832	H0-Merged-chr6-56961739-1
chr2	32587533	32588357	H0-Merged-chr2-32587945-1
chr2	32642331	32644078	H0-Merged-chr2-32643204-1
chr2	32650764	32651016	H0-Merged-chr2-32650890-1
chr3	129664429	129664699	H0-Merged-chr3-129664564-1
chr3	129669361	129669720	H0-Merged-chr3-129669540-1
chr6	57040322	57040744	H0-Merged-chr6-57040533-1
chr2	85465546	85465807	H0-Merged-chr2-85465676-1
chr2	85470726	85471488	H0-Merged-chr2-85471107-1
chr2	33048558	33049110	H0-Merged-chr2-33048834-1
chr6	57492719	57492997	H0-Merged-chr6-57492858-1
chr9	109711637	109712214	H0-Merged-chr9-109711925-1
chr2	33276660	33276870	H0-Merged-chr2-33276765-1
chr6	65213526	65213860	H0-Merged-chr6-65213693-1
chr9	110008695	110009017	H0-Merged-chr9-110008856-1
chr16	57933471	57934002	H0-Merged-chr16-57933736-1
chr2	85658102	85658470	H0-Merged-chr2-85658286-1
chr15	101735998	101736338	H0-Merged-chr15-101736168-1
chr2	33306728	33306947	H0-Merged-chr2-33306837-1
chr2	85774966	85775531	H0-Merged-chr2-85775248-1
chr11	119050841	119051026	H0-Merged-chr11-119050933-1
chr2	85781325	85781594	H0-Merged-chr2-85781459-1
chr2	33545380	33545688	H0-Merged-chr2-33545534-1
chr15	102158891	102159180	H0-Merged-chr15-102159035-1
chr3	132375346	132375570	H0-Merged-chr3-132375458-1
chr2	85901833	85902067	H0-Merged-chr2-85901950-1
chr2	33630518	33630754	H0-Merged-chr2-33630636-1
chr12	31513747	31514488	H0-Merged-chr12-31514117-1
chr12	31515282	31515919	H0-Merged-chr12-31515600-1
chr16	58448824	58449188	H0-Merged-chr16-58449006-1
chr16	58505155	58505415	H0-Merged-chr16-58505285-1
chr2	33699024	33699209	H0-Merged-chr2-33699116-1
chr2	85984193	85984638	H0-Merged-chr2-85984415-1
chr2	33720210	33720693	H0-Merged-chr2-33720451-1
chr2	33755021	33755222	H0-Merged-chr2-33755121-1
chr11	119991643	119991978	H0-Merged-chr11-119991810-1
chr2	86099917	86100266	H0-Merged-chr2-86100091-1
chr2	34325420	34325927	H0-Merged-chr2-34325673-1
chr2	86221061	86221441	H0-Merged-chr2-86221251-1
chr16	294822	295580	H0-Merged-chr16-295201-1
chr12	32109108	32109937	H0-Merged-chr12-32109522-1
chr11	120381593	120381862	H0-Merged-chr11-120381727-1
chr11	120417411	120417873	H0-Merged-chr11-120417642-1
chr11	121347706	121348323	H0-Merged-chr11-121348014-1
chr12	32582518	32583275	H0-Merged-chr12-32582896-1
chr11	121791675	121792006	H0-Merged-chr11-121791840-1
chr5	59048499	59048809	H0-Merged-chr5-59048654-1
chr22	37589960	37590188	H0-Merged-chr22-37590074-1
chr5	131089682	131090385	H0-Merged-chr5-131090033-1
chr8	57132599	57133014	H0-Merged-chr8-57132806-1
chr19	18873204	18874085	H0-Merged-chr19-18873644-1
chr19	18899642	18899827	H0-Merged-chr19-18899734-1
chr22	37777661	37778184	H0-Merged-chr22-37777922-1
chr5	131561163	131561612	H0-Merged-chr5-131561387-1
chr21	34823931	34824300	H0-Merged-chr21-34824115-1
chr5	60676586	60676973	H0-Merged-chr5-60676779-1
chr8	59348904	59349235	H0-Merged-chr8-59349069-1
chr19	19013717	19013935	H0-Merged-chr19-19013826-1
chr21	35019206	35019973	H0-Merged-chr21-35019589-1
chr5	60918295	60918544	H0-Merged-chr5-60918419-1
chr5	60927308	60927529	H0-Merged-chr5-60927418-1
chr15	40744544	40744797	H0-Merged-chr15-40744670-1
chr19	19133302	19133677	H0-Merged-chr19-19133489-1
chr22	38038682	38039386	H0-Merged-chr22-38039034-1
chr15	40863750	40864015	H0-Merged-chr15-40863882-1
chr1	231771970	231772218	H0-Merged-chr1-231772094-1
chr19	19469064	19469252	H0-Merged-chr19-19469158-1
chr14	69056046	69056261	H0-Merged-chr14-69056153-1
chr5	61773868	61774053	H0-Merged-chr5-61773960-1
chr5	62233977	62234170	H0-Merged-chr5-62234073-1
chr15	41118170	41118446	H0-Merged-chr15-41118308-1
chr22	38238101	38238479	H0-Merged-chr22-38238290-1
chr14	69171303	69171830	H0-Merged-chr14-69171566-1
chr18	55549365	55549585	H0-Merged-chr18-55549475-1
chr5	132155745	132156223	H0-Merged-chr5-132155984-1
chr21	35524894	35525079	H0-Merged-chr21-35524986-1
chr5	132244609	132245015	H0-Merged-chr5-132244812-1
chr10	116528309	116528494	H0-Merged-chr10-116528401-1
chr18	55804588	55804804	H0-Merged-chr18-55804696-1
chr21	35889962	35890274	H0-Merged-chr21-35890118-1
chr5	132292563	132293372	H0-Merged-chr5-132292967-1
chr5	64061706	64062170	H0-Merged-chr5-64061938-1
chr10	35758903	35759389	H0-Merged-chr10-35759146-1
chr10	35789860	35790329	H0-Merged-chr10-35790094-1
chr11	36217569	36217979	H0-Merged-chr11-36217774-1
chr15	41226727	41226962	H0-Merged-chr15-41226844-1
chr19	19642852	19643125	H0-Merged-chr19-19642988-1
chr21	36238004	36239147	H0-Merged-chr21-36238575-1
chr11	36302311	36303091	H0-Merged-chr11-36302701-1
chr15	41324913	41325200	H0-Merged-chr15-41325056-1
chr15	41398252	41398799	H0-Merged-chr15-41398525-1
chr10	117745518	117745731	H0-Merged-chr10-117745624-1
chr5	133209890	133210573	H0-Merged-chr5-133210231-1
chr18	56093219	56093434	H0-Merged-chr18-56093326-1
chr10	36758680	36759084	H0-Merged-chr10-36758882-1
chr10	36771426	36772192	H0-Merged-chr10-36771809-1
chr11	40328155	40329008	H0-Merged-chr11-40328581-1
chr19	28825514	28826037	H0-Merged-chr19-28825775-1
chr1	233141332	233141764	H0-Merged-chr1-233141548-1
chr1	233268779	233268964	H0-Merged-chr1-233268871-1
chr10	119109034	119109219	H0-Merged-chr10-119109126-1
chr10	119126123	119127307	H0-Merged-chr10-119126715-1
chr18	56121867	56122283	H0-Merged-chr18-56122075-1
chr11	43388226	43388425	H0-Merged-chr11-43388325-1
chr11	43704448	43704658	H0-Merged-chr11-43704553-1
chr15	41996023	41996259	H0-Merged-chr15-41996141-1
chr1	234568841	234569627	H0-Merged-chr1-234569234-1
chr14	70055726	70056511	H0-Merged-chr14-70056118-1
chr14	70080364	70081101	H0-Merged-chr14-70080732-1
chr1	234610818	234611428	H0-Merged-chr1-234611123-1
chr10	120459261	120459446	H0-Merged-chr10-120459353-1
chr10	120499489	120500015	H0-Merged-chr10-120499752-1
chr10	120506459	120506644	H0-Merged-chr10-120506551-1
chr10	43649958	43650819	H0-Merged-chr10-43650388-1
chr1	234682759	234682950	H0-Merged-chr1-234682854-1
chr10	120591608	120591946	H0-Merged-chr10-120591777-1
chr10	120678524	120679040	H0-Merged-chr10-120678782-1
chr11	44559794	44560040	H0-Merged-chr11-44559917-1
chr10	120934762	120934973	H0-Merged-chr10-120934867-1
chrX	99669830	99670428	H0-Merged-chrX-99670129-1
chr7	72427770	72428285	H0-Merged-chr7-72428027-1
chrX	100168609	100169377	H0-Merged-chrX-100168993-1
chrX	100230262	100230454	H0-Merged-chrX-100230358-1
chr4	14184411	14186228	H0-Merged-chr4-14185319-1
chr4	15402480	15402877	H0-Merged-chr4-15402678-1
chrX	100670756	100671091	H0-Merged-chrX-100670923-1
chr7	72974517	72974881	H0-Merged-chr7-72974699-1
chr7	73093179	73093420	H0-Merged-chr7-73093299-1
chr4	15471177	15471374	H0-Merged-chr4-15471275-1
chr4	15651681	15652385	H0-Merged-chr4-15652033-1
chr7	2498690	2499067	H0-Merged-chr7-2498878-1
chr7	2528066	2528635	H0-Merged-chr7-2528350-1
chr2	192425097	192425481	H0-Merged-chr2-192425289-1
chr4	15923232	15923552	H0-Merged-chr4-15923392-1
chr4	114662152	114663032	H0-Merged-chr4-114662592-1
chr4	16518440	16519213	H0-Merged-chr4-16518826-1
chr12	117171691	117171892	H0-Merged-chr12-117171791-1
chr7	73454213	73454554	H0-Merged-chr7-73454383-1
chr17	26802213	26802704	H0-Merged-chr17-26802458-1
chr7	2906276	2906489	H0-Merged-chr7-2906382-1
chrX	103554978	103555289	H0-Merged-chrX-103555133-1
chr17	59493894	59494256	H0-Merged-chr17-59494075-1
chr17	60075981	60076236	H0-Merged-chr17-60076108-1
chr4	118322256	118322505	H0-Merged-chr4-118322380-1
chr4	118998404	118999052	H0-Merged-chr4-118998728-1
chr7	2926283	2926648	H0-Merged-chr7-2926465-1
chrX	106449020	106449457	H0-Merged-chrX-106449238-1
chr17	60570259	60570459	H0-Merged-chr17-60570359-1
chr7	73714559	73715174	H0-Merged-chr7-73714866-1
chr7	3478577	3479547	H0-Merged-chr7-3479062-1
chr1	155386520	155387014	H0-Merged-chr1-155386767-1
chr1	155607165	155607457	H0-Merged-chr1-155607311-1
chr12	117936015	117936331	H0-Merged-chr12-117936173-1
chr12	117937908	117938130	H0-Merged-chr12-117938019-1
chr12	117963534	117963722	H0-Merged-chr12-117963628-1
chr12	118009259	118009639	H0-Merged-chr12-118009449-1
chr20	3331840	3332042	H0-Merged-chr20-3331941-1
chr17	60734140	60734522	H0-Merged-chr17-60734331-1
chr20	3384701	3386209	H0-Merged-chr20-3385455-1
chr17	60774669	60774881	H0-Merged-chr17-60774775-1
chr20	3474888	3475104	H0-Merged-chr20-3474996-1
chr7	73779538	73779769	H0-Merged-chr7-73779653-1
chr7	73786468	73787668	H0-Merged-chr7-73787068-1
chr17	27120817	27121002	H0-Merged-chr17-27120909-1
chr7	3988484	3989129	H0-Merged-chr7-3988806-1
chr13	50219540	50219830	H0-Merged-chr13-50219685-1
chr12	118156347	118156585	H0-Merged-chr12-118156466-1
chr17	60801874	60802275	H0-Merged-chr17-60802074-1
chr12	118232181	118232464	H0-Merged-chr12-118232322-1
chr17	60871634	60872139	H0-Merged-chr17-60871886-1
chr20	3694720	3695109	H0-Merged-chr20-3694914-1
chr1	84615811	84616325	H0-Merged-chr1-84616068-1
chr1	84643157	84643342	H0-Merged-chr1-84643249-1
chr17	27198286	27198517	H0-Merged-chr17-27198401-1
chr17	27214606	27215631	H0-Merged-chr17-27215118-1
chr4	17311302	17311534	H0-Merged-chr4-17311418-1
chr1	155841302	155841529	H0-Merged-chr1-155841415-1
chr13	50414607	50415235	H0-Merged-chr13-50414921-1
chr13	50561589	50562405	H0-Merged-chr13-50561997-1
chr17	61153448	61153638	H0-Merged-chr17-61153543-1
chr17	61160074	61160274	H0-Merged-chr17-61160174-1
chr4	120650128	120650315	H0-Merged-chr4-120650221-1
chr4	17563243	17563535	H0-Merged-chr4-17563389-1
chr1	155995647	155996142	H0-Merged-chr1-155995894-1
chr12	118622731	118622953	H0-Merged-chr12-118622842-1
chr13	50695860	50696691	H0-Merged-chr13-50696275-1
chr12	118697120	118697305	H0-Merged-chr12-118697212-1
chr1	84967529	84967983	H0-Merged-chr1-84967756-1
chr17	27472241	27472468	H0-Merged-chr17-27472354-1
chr12	119145284	119145826	H0-Merged-chr12-119145555-1
chr20	4018607	4018891	H0-Merged-chr20-4018749-1
chr12	119591694	119591905	H0-Merged-chr12-119591799-1
chr17	61564290	61565336	H0-Merged-chr17-61564813-1
chr20	4022351	4022536	H0-Merged-chr20-4022443-1
chr13	51163486	51163945	H0-Merged-chr13-51163715-1
chr13	51188782	51189581	H0-Merged-chr13-51189181-1
chr17	27884956	27885282	H0-Merged-chr17-27885119-1
chr1	156355681	156355967	H0-Merged-chr1-156355824-1
chr1	156454517	156455258	H0-Merged-chr1-156454887-1
chr1	85967015	85967241	H0-Merged-chr1-85967128-1
chr9	21922097	21922306	H0-Merged-chr9-21922201-1
chr6	20404632	20404867	H0-Merged-chr6-20404749-1
chr6	20413932	20414314	H0-Merged-chr6-20414123-1
chr6	20424434	20424757	H0-Merged-chr6-20424595-1
chr6	74228155	74228606	H0-Merged-chr6-74228380-1
chr3	133702139	133702757	H0-Merged-chr3-133702448-1
chr3	56901626	56901871	H0-Merged-chr3-56901748-1
chr9	22214490	22214680	H0-Merged-chr9-22214585-1
chr6	74409343	74410790	H0-Merged-chr6-74410066-1
chr3	57050836	57051475	H0-Merged-chr3-57051155-1
chr16	65867374	65868102	H0-Merged-chr16-65867738-1
chr2	86594066	86594365	H0-Merged-chr2-86594215-1
chr3	133921970	133922155	H0-Merged-chr3-133922062-1
chr3	134048223	134048718	H0-Merged-chr3-134048470-1
chr16	66349361	66349546	H0-Merged-chr16-66349453-1
chr16	66376470	66376766	H0-Merged-chr16-66376618-1
chr9	26943731	26943938	H0-Merged-chr9-26943834-1
chr9	27058431	27058632	H0-Merged-chr9-27058531-1
chr3	134050172	134050487	H0-Merged-chr3-134050329-1
chr6	75647395	75647840	H0-Merged-chr6-75647617-1
chr16	66467862	66468942	H0-Merged-chr16-66468402-1
chr9	27148449	27148642	H0-Merged-chr9-27148545-1
chr11	121998531	121999135	H0-Merged-chr11-121998833-1
chr2	87511539	87512258	H0-Merged-chr2-87511898-1
chr16	1017262	1017523	H0-Merged-chr16-1017392-1
chr2	37109681	37109866	H0-Merged-chr2-37109773-1
chr9	112941459	112941644	H0-Merged-chr9-112941551-1
chr6	21670175	21670488	H0-Merged-chr6-21670331-1
chr11	122012677	122012880	H0-Merged-chr11-122012778-1
chr9	113464935	113465688	H0-Merged-chr9-113465311-1
chr16	66691861	66692765	H0-Merged-chr16-66692313-1
chr2	87806279	87806534	H0-Merged-chr2-87806406-1
chr3	135893864	135894543	H0-Merged-chr3-135894203-1
chr16	1468079	1468352	H0-Merged-chr16-1468215-1
chr3	135912253	135912751	H0-Merged-chr3-135912502-1
chr2	37642516	37643212	H0-Merged-chr2-37642864-1
chr6	76313961	76314652	H0-Merged-chr6-76314306-1
chr16	66762550	66763305	H0-Merged-chr16-66762927-1
chr2	87827871	87828518	H0-Merged-chr2-87828194-1
chr11	122536639	122536969	H0-Merged-chr11-122536804-1
chr3	136447967	136448185	H0-Merged-chr3-136448076-1
chr2	37699692	37700480	H0-Merged-chr2-37700086-1
chr3	136465396	136466301	H0-Merged-chr3-136465848-1
chr2	37801212	37801397	H0-Merged-chr2-37801304-1
chr3	58129209	58129470	H0-Merged-chr3-58129339-1
chr11	122543551	122543783	H0-Merged-chr11-122543667-1
chr11	122569652	122570499	H0-Merged-chr11-122570075-1
chr16	1731546	1731751	H0-Merged-chr16-1731648-1
chr12	41671211	41671421	H0-Merged-chr12-41671316-1
chr3	58208139	58208349	H0-Merged-chr3-58208244-1
chr2	88348906	88349120	H0-Merged-chr2-88349013-1
chr12	42513304	42513539	H0-Merged-chr12-42513421-1
chr16	67149306	67149767	H0-Merged-chr16-67149536-1
chr16	67212116	67212796	H0-Merged-chr16-67212456-1
chr16	67286578	67286795	H0-Merged-chr16-67286686-1
chr11	122926364	122927250	H0-Merged-chr11-122926807-1
chr12	42842641	42842830	H0-Merged-chr12-42842735-1
chr11	123082009	123082351	H0-Merged-chr11-123082180-1
chr8	61263303	61264018	H0-Merged-chr8-61263660-1
chr8	670836	671445	H0-Merged-chr8-671140-1
chr8	61603202	61603387	H0-Merged-chr8-61603294-1
chr8	61644819	61645032	H0-Merged-chr8-61644925-1
chr22	38590428	38590626	H0-Merged-chr22-38590527-1
chr8	61665917	61666303	H0-Merged-chr8-61666110-1
chr8	61703887	61704370	H0-Merged-chr8-61704128-1
chr21	36654183	36654424	H0-Merged-chr21-36654303-1
chr21	36854952	36855158	H0-Merged-chr21-36855055-1
chr8	61797571	61798468	H0-Merged-chr8-61798019-1
chr22	38779403	38780012	H0-Merged-chr22-38779707-1
chr22	38889169	38889521	H0-Merged-chr22-38889345-1
chr18	56514751	56515256	H0-Merged-chr18-56515003-1
chr18	56538724	56538960	H0-Merged-chr18-56538842-1
chr21	37064783	37065011	H0-Merged-chr21-37064897-1
chr5	66038884	66039318	H0-Merged-chr5-66039101-1
chr8	6407222	6408434	H0-Merged-chr8-6407828-1
chr8	6435624	6436414	H0-Merged-chr8-6436019-1
chr19	32936039	32936733	H0-Merged-chr19-32936386-1
chr21	37536293	37536522	H0-Merged-chr21-37536407-1
chr18	57450662	57450905	H0-Merged-chr18-57450783-1
chr5	66302281	66303904	H0-Merged-chr5-66303092-1
chr8	64105670	64105912	H0-Merged-chr8-64105791-1
chr15	42447286	42447622	H0-Merged-chr15-42447454-1
chr22	39258368	39258843	H0-Merged-chr22-39258605-1
chr22	39351100	39351700	H0-Merged-chr22-39351400-1
chr1	234843372	234843589	H0-Merged-chr1-234843480-1
chr18	57527223	57527710	H0-Merged-chr18-57527466-1
chr8	64108327	64108967	H0-Merged-chr8-64108647-1
chr21	37780235	37780690	H0-Merged-chr21-37780462-1
chr11	44582481	44583592	H0-Merged-chr11-44583036-1
chr11	44614039	44614666	H0-Merged-chr11-44614352-1
chr1	234902848	234903397	H0-Merged-chr1-234903122-1
chr1	234906467	234906681	H0-Merged-chr1-234906574-1
chr1	234966416	234966762	H0-Merged-chr1-234966589-1
chr14	71471052	71472142	H0-Merged-chr14-71471597-1
chr18	57651007	57651192	H0-Merged-chr18-57651099-1
chr18	58352492	58352677	H0-Merged-chr18-58352584-1
chr21	37813685	37814365	H0-Merged-chr21-37814025-1
chr5	134727794	134728499	H0-Merged-chr5-134728146-1
chr10	121043258	121043506	H0-Merged-chr10-121043382-1
chr14	71855694	71855919	H0-Merged-chr14-71855806-1
chr18	59170815	59171005	H0-Merged-chr18-59170910-1
chr5	135336462	135337397	H0-Merged-chr5-135336929-1
chr21	38077665	38077925	H0-Merged-chr21-38077795-1
chr8	67430927	67431229	H0-Merged-chr8-67431078-1
chr8	8138995	8139184	H0-Merged-chr8-8139089-1
chr11	44799446	44799852	H0-Merged-chr11-44799649-1
chr11	44800947	44801463	H0-Merged-chr11-44801205-1
chr15	43167744	43167944	H0-Merged-chr15-43167844-1
chr10	121124513	121125289	H0-Merged-chr10-121124901-1
chr21	38188895	38189135	H0-Merged-chr21-38189015-1
chr21	38221859	38222144	H0-Merged-chr21-38222001-1
chr21	38226697	38227100	H0-Merged-chr21-38226898-1
chr19	34670840	34671065	H0-Merged-chr19-34670952-1
chr22	39801721	39801908	H0-Merged-chr22-39801814-1
chr5	135744903	135745779	H0-Merged-chr5-135745341-1
chr18	59521250	59522095	H0-Merged-chr18-59521672-1
chr5	135994307	135994505	H0-Merged-chr5-135994406-1
chr11	44979563	44979867	H0-Merged-chr11-44979715-1
chr15	44041068	44042486	H0-Merged-chr15-44041777-1
chr1	235411014	235411543	H0-Merged-chr1-235411278-1
chr1	235469022	235469241	H0-Merged-chr1-235469131-1
chr10	121350722	121350917	H0-Merged-chr10-121350819-1
chr15	44113078	44113263	H0-Merged-chr15-44113170-1
chr1	235665382	235665737	H0-Merged-chr1-235665559-1
chr19	34921859	34922345	H0-Merged-chr19-34922102-1
chr14	73355897	73356285	H0-Merged-chr14-73356091-1
chr18	59727445	59727641	H0-Merged-chr18-59727543-1
chr11	45745252	45745437	H0-Merged-chr11-45745344-1
chr11	45750589	45750991	H0-Merged-chr11-45750790-1
chr15	44582981	44583515	H0-Merged-chr15-44583248-1
chr1	236105344	236105714	H0-Merged-chr1-236105529-1
chr10	121571401	121571586	H0-Merged-chr10-121571493-1
chr1	236266495	236267374	H0-Merged-chr1-236266934-1
chr11	46052915	46053134	H0-Merged-chr11-46053024-1
chr7	74076893	74077329	H0-Merged-chr7-74077111-1
chr7	74230545	74230730	H0-Merged-chr7-74230637-1
chr7	4965996	4966223	H0-Merged-chr7-4966109-1
chrX	107550935	107551665	H0-Merged-chrX-107551300-1
chr7	74347373	74347558	H0-Merged-chr7-74347465-1
chr7	5213973	5214267	H0-Merged-chr7-5214120-1
chrX	109406832	109407043	H0-Merged-chrX-109406937-1
chr20	4105463	4105697	H0-Merged-chr20-4105580-1
chr20	4136383	4136994	H0-Merged-chr20-4136688-1
chr4	122741234	122741836	H0-Merged-chr4-122741535-1
chr2	197813813	197814129	H0-Merged-chr2-197813971-1
chr2	197897212	197897402	H0-Merged-chr2-197897307-1
chrX	109421453	109421906	H0-Merged-chrX-109421679-1
chrX	109652581	109653283	H0-Merged-chrX-109652932-1
chr20	4426552	4426742	H0-Merged-chr20-4426647-1
chr20	4499990	4500466	H0-Merged-chr20-4500228-1
chr20	4617576	4618196	H0-Merged-chr20-4617886-1
chr4	123741114	123741552	H0-Merged-chr4-123741333-1
chr7	75351951	75352328	H0-Merged-chr7-75352139-1
chr2	198360311	198360496	H0-Merged-chr2-198360403-1
chr7	5816740	5816964	H0-Merged-chr7-5816852-1
chrX	114834603	114834843	H0-Merged-chrX-114834723-1
chr17	28420344	28421045	H0-Merged-chr17-28420694-1
chr12	120976383	120978765	H0-Merged-chr12-120977574-1
chr4	124247448	124247633	H0-Merged-chr4-124247540-1
chr17	28694960	28695445	H0-Merged-chr17-28695202-1
chr2	198774115	198774613	H0-Merged-chr2-198774364-1
chr7	6363519	6364019	H0-Merged-chr7-6363769-1
chr12	121084716	121085322	H0-Merged-chr12-121085019-1
chr20	4885237	4885578	H0-Merged-chr20-4885407-1
chr20	4898042	4899314	H0-Merged-chr20-4898678-1
chr1	86081094	86081335	H0-Merged-chr1-86081214-1
chr2	201110217	201110861	H0-Merged-chr2-201110539-1
chr13	52645591	52645936	H0-Merged-chr13-52645763-1
chr1	86932724	86932909	H0-Merged-chr1-86932816-1
chr13	52949451	52949869	H0-Merged-chr13-52949660-1
chr17	62467169	62467695	H0-Merged-chr17-62467432-1
chr13	52955668	52955872	H0-Merged-chr13-52955770-1
chr1	87176051	87176236	H0-Merged-chr1-87176143-1
chr1	87182017	87182202	H0-Merged-chr1-87182109-1
chr17	29040299	29040958	H0-Merged-chr17-29040628-1
chr17	29063944	29064633	H0-Merged-chr17-29064288-1
chr4	25844548	25845383	H0-Merged-chr4-25844965-1
chr20	5201078	5201464	H0-Merged-chr20-5201271-1
chr17	29283435	29284252	H0-Merged-chr17-29283843-1
chr20	5602093	5602631	H0-Merged-chr20-5602362-1
chr20	5605657	5605847	H0-Merged-chr20-5605752-1
chr17	29402914	29403102	H0-Merged-chr17-29403008-1
chr12	121943514	121943988	H0-Merged-chr12-121943751-1
chr12	122015428	122016602	H0-Merged-chr12-122016015-1
chr1	89166813	89166998	H0-Merged-chr1-89166905-1
chr13	59667916	59668403	H0-Merged-chr13-59668159-1
chr12	122058503	122058689	H0-Merged-chr12-122058596-1
chr17	29914480	29915231	H0-Merged-chr17-29914855-1
chr1	90068799	90069383	H0-Merged-chr1-90069091-1
chr9	32508551	32509124	H0-Merged-chr9-32508837-1
chr9	32570120	32570449	H0-Merged-chr9-32570284-1
chr9	114638141	114638455	H0-Merged-chr9-114638298-1
chr9	33135476	33135979	H0-Merged-chr9-33135727-1
chr6	78209189	78209477	H0-Merged-chr6-78209333-1
chr6	78816103	78816714	H0-Merged-chr6-78816408-1
chr3	137829455	137830014	H0-Merged-chr3-137829734-1
chr6	79677506	79677877	H0-Merged-chr6-79677691-1
chr2	38601138	38601340	H0-Merged-chr2-38601239-1
chr3	138084679	138085170	H0-Merged-chr3-138084924-1
chr2	38755223	38755791	H0-Merged-chr2-38755507-1
chr16	2190147	2190546	H0-Merged-chr16-2190346-1
chr2	92004078	92004842	H0-Merged-chr2-92004460-1
chr2	92187715	92187934	H0-Merged-chr2-92187824-1
chr3	138459011	138459712	H0-Merged-chr3-138459361-1
chr3	138539394	138539579	H0-Merged-chr3-138539486-1
chr6	80378086	80378271	H0-Merged-chr6-80378178-1
chr9	115062781	115063204	H0-Merged-chr9-115062992-1
chr3	58933709	58933904	H0-Merged-chr3-58933806-1
chr3	58975743	58975947	H0-Merged-chr3-58975845-1
chr6	25053780	25054277	H0-Merged-chr6-25054028-1
chr9	33527593	33528328	H0-Merged-chr9-33527960-1
chr16	2223973	2224247	H0-Merged-chr16-2224110-1
chr9	115611214	115612111	H0-Merged-chr9-115611662-1
chr3	61549362	61550905	H0-Merged-chr3-61550133-1
chr12	43001526	43001711	H0-Merged-chr12-43001618-1
chr12	43007359	43007623	H0-Merged-chr12-43007491-1
chr3	61575356	61575733	H0-Merged-chr3-61575544-1
chr12	43090725	43090936	H0-Merged-chr12-43090830-1
chr9	33773866	33774478	H0-Merged-chr9-33774172-1
chr2	96291766	96292093	H0-Merged-chr2-96291929-1
chr16	2338639	2338937	H0-Merged-chr16-2338788-1
chr2	96535304	96535596	H0-Merged-chr2-96535450-1
chr3	139105225	139105883	H0-Merged-chr3-139105554-1
chr16	67676033	67676324	H0-Merged-chr16-67676178-1
chr6	25980837	25981358	H0-Merged-chr6-25981097-1
chr12	43449231	43449662	H0-Merged-chr12-43449446-1
chr16	67742313	67742628	H0-Merged-chr16-67742470-1
chr11	124472261	124472699	H0-Merged-chr11-124472480-1
chr11	124495099	124495667	H0-Merged-chr11-124495383-1
chr3	139254587	139254801	H0-Merged-chr3-139254694-1
chr2	96616280	96616933	H0-Merged-chr2-96616606-1
chr3	141022477	141022929	H0-Merged-chr3-141022703-1
chr9	34073250	34073632	H0-Merged-chr9-34073441-1
chr16	67868213	67868398	H0-Merged-chr16-67868305-1
chr2	96750715	96751537	H0-Merged-chr2-96751126-1
chr16	2709910	2710775	H0-Merged-chr16-2710342-1
chr3	62553076	62553911	H0-Merged-chr3-62553493-1
chr12	44232900	44233129	H0-Merged-chr12-44233014-1
chr16	67949724	67950093	H0-Merged-chr16-67949908-1
chr16	67951378	67951827	H0-Merged-chr16-67951602-1
chr16	2889166	2889438	H0-Merged-chr16-2889302-1
chr6	84325012	84325279	H0-Merged-chr6-84325145-1
chr3	62574848	62575045	H0-Merged-chr3-62574946-1
chr12	45709073	45709364	H0-Merged-chr12-45709218-1
chr11	124813305	124813961	H0-Merged-chr11-124813633-1
chr16	2924694	2924884	H0-Merged-chr16-2924789-1
chr16	68063436	68064258	H0-Merged-chr16-68063847-1
chr16	2976954	2977389	H0-Merged-chr16-2977171-1
chr3	141344115	141344661	H0-Merged-chr3-141344388-1
chr16	68267738	68268247	H0-Merged-chr16-68267992-1
chr16	68281268	68281730	H0-Merged-chr16-68281499-1
chr11	125215548	125216016	H0-Merged-chr11-125215782-1
chr11	125228304	125228736	H0-Merged-chr11-125228520-1
chr2	97486145	97486369	H0-Merged-chr2-97486257-1
chr12	46697950	46698448	H0-Merged-chr12-46698199-1
chr11	125233916	125234417	H0-Merged-chr11-125234166-1
chr11	125379643	125380130	H0-Merged-chr11-125379886-1
chr5	67030436	67030765	H0-Merged-chr5-67030600-1
chr5	67139135	67139388	H0-Merged-chr5-67139261-1
chr8	8223984	8224685	H0-Merged-chr8-8224334-1
chr5	67370619	67370870	H0-Merged-chr5-67370744-1
chr22	39886129	39886705	H0-Merged-chr22-39886417-1
chr22	39890864	39891255	H0-Merged-chr22-39891059-1
chr22	39892337	39892801	H0-Merged-chr22-39892569-1
chr5	136105822	136106450	H0-Merged-chr5-136106136-1
chr21	38631961	38632146	H0-Merged-chr21-38632053-1
chr21	38636592	38637359	H0-Merged-chr21-38636975-1
chr5	136375883	136376585	H0-Merged-chr5-136376234-1
chr8	68796415	68796661	H0-Merged-chr8-68796538-1
chr5	136406337	136406555	H0-Merged-chr5-136406446-1
chr21	38763063	38763630	H0-Merged-chr21-38763346-1
chr19	34992235	34992473	H0-Merged-chr19-34992354-1
chr22	40447221	40447627	H0-Merged-chr22-40447424-1
chr18	60051236	60051558	H0-Merged-chr18-60051397-1
chr5	136704197	136704637	H0-Merged-chr5-136704417-1
chr19	35484515	35486622	H0-Merged-chr19-35485568-1
chr5	136715844	136716390	H0-Merged-chr5-136716117-1
chr8	69095217	69095432	H0-Merged-chr8-69095324-1
chr8	69992253	69992440	H0-Merged-chr8-69992346-1
chr8	8910838	8911108	H0-Merged-chr8-8910973-1
chr19	35557830	35558094	H0-Merged-chr19-35557962-1
chr18	60246236	60246490	H0-Merged-chr18-60246363-1
chr18	60288919	60289104	H0-Merged-chr18-60289011-1
chr5	137040909	137041457	H0-Merged-chr5-137041183-1
chr5	69003099	69003367	H0-Merged-chr5-69003233-1
chr8	8953413	8953710	H0-Merged-chr8-8953561-1
chr15	45068099	45068415	H0-Merged-chr15-45068257-1
chr19	35763055	35763359	H0-Merged-chr19-35763207-1
chr8	70907116	70907402	H0-Merged-chr8-70907259-1
chr8	71000632	71000932	H0-Merged-chr8-71000782-1
chr8	9278449	9278642	H0-Merged-chr8-9278545-1
chr11	46330387	46330614	H0-Merged-chr11-46330500-1
chr22	41008747	41008932	H0-Merged-chr22-41008839-1
chr1	236922894	236923096	H0-Merged-chr1-236922995-1
chr5	137566615	137567032	H0-Merged-chr5-137566823-1
chr18	61078674	61078864	H0-Merged-chr18-61078769-1
chr8	74226764	74226958	H0-Merged-chr8-74226861-1
chr8	74243359	74243674	H0-Merged-chr8-74243516-1
chr22	41349546	41350173	H0-Merged-chr22-41349859-1
chr14	74684315	74684709	H0-Merged-chr14-74684512-1
chr14	74829304	74829644	H0-Merged-chr14-74829474-1
chr18	64862203	64862448	H0-Merged-chr18-64862325-1
chr5	137905536	137906233	H0-Merged-chr5-137905884-1
chr19	36526563	36526808	H0-Merged-chr19-36526685-1
chr19	36568084	36568385	H0-Merged-chr19-36568234-1
chr14	74980536	74981264	H0-Merged-chr14-74980900-1
chr14	75034395	75035187	H0-Merged-chr14-75034791-1
chr18	67946725	67946911	H0-Merged-chr18-67946818-1
chr5	137968641	137968826	H0-Merged-chr5-137968733-1
chr11	46697784	46698588	H0-Merged-chr11-46698186-1
chr15	46095956	46096178	H0-Merged-chr15-46096067-1
chr15	46163659	46164094	H0-Merged-chr15-46163876-1
chr15	46165964	46166162	H0-Merged-chr15-46166063-1
chr15	46286738	46287009	H0-Merged-chr15-46286873-1
chr1	243646013	243646401	H0-Merged-chr1-243646207-1
chr18	68084965	68085245	H0-Merged-chr18-68085105-1
chr18	68131760	68132299	H0-Merged-chr18-68132029-1
chr11	47184334	47184520	H0-Merged-chr11-47184427-1
chr19	36710126	36710985	H0-Merged-chr19-36710555-1
chr18	68681576	68682003	H0-Merged-chr18-68681789-1
chr14	75353595	75354470	H0-Merged-chr14-75354032-1
chr10	124342113	124342974	H0-Merged-chr10-124342543-1
chr10	125784890	125785273	H0-Merged-chr10-125785081-1
chrX	115511150	115511448	H0-Merged-chrX-115511299-1
chrX	117286899	117287110	H0-Merged-chrX-117287004-1
chr7	6544201	6544611	H0-Merged-chr7-6544406-1
chr4	26314210	26314937	H0-Merged-chr4-26314573-1
chr4	26343125	26344284	H0-Merged-chr4-26343704-1
chrX	119021580	119021993	H0-Merged-chrX-119021786-1
chr4	125591335	125591700	H0-Merged-chr4-125591517-1
chr7	8075334	8075628	H0-Merged-chr7-8075481-1
chr4	26874985	26875402	H0-Merged-chr4-26875193-1
chr7	11228517	11228760	H0-Merged-chr7-11228638-1
chr7	11485362	11485758	H0-Merged-chr7-11485560-1
chrX	122741862	122742406	H0-Merged-chrX-122742134-1
chr7	11654670	11654890	H0-Merged-chr7-11654780-1
chrX	122889420	122889831	H0-Merged-chrX-122889625-1
chr4	126342186	126342412	H0-Merged-chr4-126342299-1
chr20	6054531	6054940	H0-Merged-chr20-6054735-1
chr2	202209815	202210123	H0-Merged-chr2-202209969-1
chr7	12134182	12134545	H0-Merged-chr7-12134363-1
chrX	127297273	127297819	H0-Merged-chrX-127297546-1
chrX	128690322	128691119	H0-Merged-chrX-128690720-1
chr4	128809047	128809649	H0-Merged-chr4-128809348-1
chr2	202423201	202423712	H0-Merged-chr2-202423456-1
chr7	12682725	12683413	H0-Merged-chr7-12683069-1
chrX	128768704	128769320	H0-Merged-chrX-128769012-1
chrX	128774088	128774354	H0-Merged-chrX-128774221-1
chr17	63035594	63035844	H0-Merged-chr17-63035719-1
chr17	63045383	63045843	H0-Merged-chr17-63045613-1
chr20	6617341	6617987	H0-Merged-chr20-6617664-1
chr20	6635698	6636038	H0-Merged-chr20-6635868-1
chr7	77176195	77176665	H0-Merged-chr7-77176430-1
chr17	30487334	30487932	H0-Merged-chr17-30487633-1
chrX	129118866	129119087	H0-Merged-chrX-129118976-1
chr13	60454128	60454313	H0-Merged-chr13-60454220-1
chr20	7391818	7392009	H0-Merged-chr20-7391913-1
chr4	129230418	129230620	H0-Merged-chr4-129230519-1
chr20	7631175	7631401	H0-Merged-chr20-7631288-1
chr4	37683086	37683431	H0-Merged-chr4-37683258-1
chr13	61254240	61254671	H0-Merged-chr13-61254455-1
chr12	122469825	122470010	H0-Merged-chr12-122469917-1
chr17	30900564	30900749	H0-Merged-chr17-30900656-1
chr13	71865111	71865603	H0-Merged-chr13-71865357-1
chr17	63804642	63804866	H0-Merged-chr17-63804754-1
chr4	129697587	129698086	H0-Merged-chr4-129697836-1
chr4	129749121	129749306	H0-Merged-chr4-129749213-1
chr1	91461963	91462188	H0-Merged-chr1-91462075-1
chr4	129780380	129780865	H0-Merged-chr4-129780622-1
chr2	203319608	203319793	H0-Merged-chr2-203319700-1
chr4	38143740	38144009	H0-Merged-chr4-38143874-1
chr2	203502702	203502887	H0-Merged-chr2-203502794-1
chr12	123006422	123006607	H0-Merged-chr12-123006514-1
chr17	64284194	64284677	H0-Merged-chr17-64284435-1
chr1	92088296	92088644	H0-Merged-chr1-92088470-1
chr17	64313376	64313650	H0-Merged-chr17-64313513-1
chr12	123310446	123310823	H0-Merged-chr12-123310634-1
chr17	64421945	64422130	H0-Merged-chr17-64422037-1
chr20	9147025	9147232	H0-Merged-chr20-9147128-1
chr20	9181242	9181431	H0-Merged-chr20-9181336-1
chr1	92202758	92203083	H0-Merged-chr1-92202920-1
chr12	123346690	123347256	H0-Merged-chr12-123346973-1
chr12	123365411	123366229	H0-Merged-chr12-123365820-1
chr13	74684302	74684487	H0-Merged-chr13-74684394-1
chr1	92329766	92330340	H0-Merged-chr1-92330053-1
chr17	32735598	32735984	H0-Merged-chr17-32735791-1
chr17	33167596	33168003	H0-Merged-chr17-33167799-1
chr1	92885316	92885591	H0-Merged-chr1-92885453-1
chr13	75495248	75495615	H0-Merged-chr13-75495431-1
chr13	75747894	75748318	H0-Merged-chr13-75748106-1
chr1	93502142	93502388	H0-Merged-chr1-93502265-1
chr9	116224337	116224774	H0-Merged-chr9-116224555-1
chr9	34546714	34546916	H0-Merged-chr9-34546815-1
chr9	116569890	116570179	H0-Merged-chr9-116570034-1
chr3	64447595	64448038	H0-Merged-chr3-64447816-1
chr3	64547167	64547352	H0-Merged-chr3-64547259-1
chr9	35165454	35167011	H0-Merged-chr9-35166232-1
chr6	26570406	26571168	H0-Merged-chr6-26570787-1
chr16	68734183	68734595	H0-Merged-chr16-68734389-1
chr2	42481266	42481511	H0-Merged-chr2-42481388-1
chr3	142706546	142706837	H0-Merged-chr3-142706691-1
chr16	68794614	68794933	H0-Merged-chr16-68794773-1
chr9	35481145	35482167	H0-Merged-chr9-35481656-1
chr16	68880560	68881180	H0-Merged-chr16-68880870-1
chr16	68964818	68965127	H0-Merged-chr16-68964972-1
chr16	68986678	68987230	H0-Merged-chr16-68986954-1
chr2	42850311	42850673	H0-Merged-chr2-42850492-1
chr3	143045259	143045451	H0-Merged-chr3-143045355-1
chr3	64887225	64887534	H0-Merged-chr3-64887379-1
chr16	69095256	69095515	H0-Merged-chr16-69095385-1
chr2	98488000	98488236	H0-Merged-chr2-98488118-1
chr2	98599473	98599785	H0-Merged-chr2-98599629-1
chr2	43138324	43138557	H0-Merged-chr2-43138440-1
chr3	143157607	143158317	H0-Merged-chr3-143157962-1
chr9	117152518	117152888	H0-Merged-chr9-117152703-1
chr11	126261368	126262165	H0-Merged-chr11-126261766-1
chr16	3801389	3801888	H0-Merged-chr16-3801638-1
chr3	143833734	143833919	H0-Merged-chr3-143833826-1
chr3	144087886	144088494	H0-Merged-chr3-144088190-1
chr2	43276159	43276344	H0-Merged-chr2-43276251-1
chr12	47586971	47587741	H0-Merged-chr12-47587356-1
chr16	3877678	3878269	H0-Merged-chr16-3877973-1
chr2	99089101	99089334	H0-Merged-chr2-99089217-1
chr11	127904993	127905193	H0-Merged-chr11-127905093-1
chr2	99104381	99104976	H0-Merged-chr2-99104678-1
chr3	145869043	145869289	H0-Merged-chr3-145869166-1
chr6	89792736	89793891	H0-Merged-chr6-89793313-1
chr6	89841965	89842203	H0-Merged-chr6-89842084-1
chr6	27265317	27266008	H0-Merged-chr6-27265662-1
chr3	145902474	145902659	H0-Merged-chr3-145902566-1
chr2	99298799	99299310	H0-Merged-chr2-99299054-1
chr2	43424223	43424525	H0-Merged-chr2-43424374-1
chr3	65893050	65893483	H0-Merged-chr3-65893266-1
chr3	65912277	65912484	H0-Merged-chr3-65912380-1
chr6	27520895	27521474	H0-Merged-chr6-27521184-1
chr12	48030906	48031362	H0-Merged-chr12-48031134-1
chr2	43545220	43545439	H0-Merged-chr2-43545329-1
chr3	65945598	65945783	H0-Merged-chr3-65945690-1
chr16	69780237	69780525	H0-Merged-chr16-69780381-1
chr16	69865794	69865979	H0-Merged-chr16-69865886-1
chr16	4624976	4625185	H0-Merged-chr16-4625080-1
chr12	49069945	49070165	H0-Merged-chr12-49070055-1
chr5	71040318	71040530	H0-Merged-chr5-71040424-1
chr8	74376733	74376928	H0-Merged-chr8-74376830-1
chr8	10565831	10566119	H0-Merged-chr8-10565975-1
chr8	74687847	74688214	H0-Merged-chr8-74688030-1
chr5	71487241	71487518	H0-Merged-chr5-71487379-1
chr5	138182934	138183406	H0-Merged-chr5-138183170-1
chr5	71502257	71503081	H0-Merged-chr5-71502669-1
chr22	41797825	41798395	H0-Merged-chr22-41798110-1
chr5	71568452	71568668	H0-Merged-chr5-71568560-1
chr5	138256505	138256711	H0-Merged-chr5-138256608-1
chr8	75704081	75704471	H0-Merged-chr8-75704276-1
chr8	77909531	77909758	H0-Merged-chr8-77909644-1
chr8	78039362	78039665	H0-Merged-chr8-78039513-1
chr8	11667420	11667976	H0-Merged-chr8-11667698-1
chr18	72268381	72269062	H0-Merged-chr18-72268721-1
chr21	42568936	42569124	H0-Merged-chr21-42569030-1
chr5	138567960	138568154	H0-Merged-chr5-138568057-1
chr8	80200664	80200875	H0-Merged-chr8-80200769-1
chr22	42303763	42303960	H0-Merged-chr22-42303861-1
chr21	43225865	43226339	H0-Merged-chr21-43226102-1
chr21	43283362	43283754	H0-Merged-chr21-43283558-1
chr5	138727239	138727576	H0-Merged-chr5-138727407-1
chr8	12282670	12282885	H0-Merged-chr8-12282777-1
chr19	38465986	38466664	H0-Merged-chr19-38466325-1
chr22	42353582	42354315	H0-Merged-chr22-42353948-1
chr14	75683548	75683774	H0-Merged-chr14-75683661-1
chr1	199601874	199602334	H0-Merged-chr1-199602104-1
chr21	43370375	43370579	H0-Merged-chr21-43370477-1
chr8	80934674	80934883	H0-Merged-chr8-80934778-1
chr10	126069256	126069523	H0-Merged-chr10-126069389-1
chr1	199745891	199746627	H0-Merged-chr1-199746259-1
chr21	43514173	43514719	H0-Merged-chr21-43514446-1
chr8	81152631	81153432	H0-Merged-chr8-81153031-1
chr15	48924718	48925789	H0-Merged-chr15-48925253-1
chr22	42615945	42616275	H0-Merged-chr22-42616110-1
chr22	42659071	42659353	H0-Merged-chr22-42659212-1
chr22	42696114	42696344	H0-Merged-chr22-42696229-1
chr1	245181322	245181812	H0-Merged-chr1-245181567-1
chr10	126282705	126282890	H0-Merged-chr10-126282797-1
chr10	126332840	126333246	H0-Merged-chr10-126333043-1
chr10	126342853	126343649	H0-Merged-chr10-126343251-1
chr18	74090533	74090785	H0-Merged-chr18-74090659-1
chr8	81209804	81210027	H0-Merged-chr8-81209915-1
chr5	139085342	139085561	H0-Merged-chr5-139085451-1
chr22	42903493	42903760	H0-Merged-chr22-42903626-1
chr1	246206854	246207281	H0-Merged-chr1-246207067-1
chr21	43718531	43718909	H0-Merged-chr21-43718720-1
chr18	74747971	74748601	H0-Merged-chr18-74748286-1
chr5	139154652	139155438	H0-Merged-chr5-139155045-1
chr21	43835277	43835667	H0-Merged-chr21-43835472-1
chr1	200263478	200263831	H0-Merged-chr1-200263654-1
chr5	139362126	139362398	H0-Merged-chr5-139362262-1
chr15	49731285	49731520	H0-Merged-chr15-49731402-1
chr1	246382442	246382636	H0-Merged-chr1-246382539-1
chr10	126487364	126487678	H0-Merged-chr10-126487521-1
chr18	74807493	74807766	H0-Merged-chr18-74807629-1
chr5	139417201	139417495	H0-Merged-chr5-139417348-1
chr21	43927748	43928006	H0-Merged-chr21-43927877-1
chr15	51055759	51055969	H0-Merged-chr15-51055864-1
chr10	126711023	126711594	H0-Merged-chr10-126711308-1
chr14	77057580	77057785	H0-Merged-chr14-77057682-1
chr1	247089944	247090766	H0-Merged-chr1-247090355-1
chr1	247092378	247092606	H0-Merged-chr1-247092492-1
chr10	126816247	126816891	H0-Merged-chr10-126816569-1
chr14	77497896	77502409	H0-Merged-chr14-77500152-1
chr11	57169608	57169864	H0-Merged-chr11-57169736-1
chr11	57189142	57189477	H0-Merged-chr11-57189309-1
chr15	52016934	52017209	H0-Merged-chr15-52017071-1
chr15	52024214	52024425	H0-Merged-chr15-52024319-1
chr1	249099680	249100140	H0-Merged-chr1-249099910-1
chr10	127265708	127265957	H0-Merged-chr10-127265832-1
chr10	127322427	127322966	H0-Merged-chr10-127322696-1
chr1	201553737	201554024	H0-Merged-chr1-201553880-1
chr11	57410604	57411155	H0-Merged-chr11-57410879-1
chr10	127779540	127779953	H0-Merged-chr10-127779746-1
chrX	129250367	129250722	H0-Merged-chrX-129250544-1
chrX	130844901	130845086	H0-Merged-chrX-130844993-1
chr7	80932455	80932640	H0-Merged-chr7-80932547-1
chr7	81061995	81062181	H0-Merged-chr7-81062088-1
chr7	81113367	81113742	H0-Merged-chr7-81113554-1
chrX	130917494	130918159	H0-Merged-chrX-130917826-1
chrX	131322402	131322717	H0-Merged-chrX-131322559-1
chr7	16066203	16066543	H0-Merged-chr7-16066373-1
chrX	131371401	131371852	H0-Merged-chrX-131371626-1
chr7	82451786	82451995	H0-Merged-chr7-82451890-1
chr4	38330398	38331164	H0-Merged-chr4-38330781-1
chr4	38603046	38603254	H0-Merged-chr4-38603150-1
chr7	16695410	16696256	H0-Merged-chr7-16695833-1
chrX	133673396	133673743	H0-Merged-chrX-133673569-1
chrX	133700350	133700740	H0-Merged-chrX-133700545-1
chr4	133943973	133944276	H0-Merged-chr4-133944124-1
chr4	134074530	134074826	H0-Merged-chr4-134074678-1
chr7	84326091	84326276	H0-Merged-chr7-84326183-1
chr7	16929064	16929728	H0-Merged-chr7-16929396-1
chr7	17010504	17010963	H0-Merged-chr7-17010733-1
chr2	204456977	204457454	H0-Merged-chr2-204457215-1
chr4	38873459	38874409	H0-Merged-chr4-38873934-1
chr7	17084557	17085174	H0-Merged-chr7-17084865-1
chrX	133861026	133861314	H0-Merged-chrX-133861170-1
chr12	123545154	123545788	H0-Merged-chr12-123545471-1
chr17	64610855	64611192	H0-Merged-chr17-64611023-1
chr12	123550290	123550648	H0-Merged-chr12-123550469-1
chr20	10320728	10320954	H0-Merged-chr20-10320841-1
chr17	64720660	64721283	H0-Merged-chr17-64720971-1
chr17	64723592	64724122	H0-Merged-chr17-64723857-1
chr7	87304260	87304445	H0-Merged-chr7-87304352-1
chr17	33421873	33422503	H0-Merged-chr17-33422188-1
chr4	39526237	39527098	H0-Merged-chr4-39526667-1
chr7	18053457	18054172	H0-Merged-chr7-18053814-1
chr17	65148321	65148519	H0-Merged-chr17-65148420-1
chr4	39703430	39703624	H0-Merged-chr4-39703527-1
chr4	39731370	39732090	H0-Merged-chr4-39731730-1
chr13	75824965	75825603	H0-Merged-chr13-75825284-1
chr17	65289074	65290401	H0-Merged-chr17-65289737-1
chr4	139952121	139952371	H0-Merged-chr4-139952246-1
chr7	90210676	90211179	H0-Merged-chr7-90210927-1
chr2	205476897	205477086	H0-Merged-chr2-205476991-1
chr2	205494063	205494268	H0-Merged-chr2-205494165-1
chr4	39828193	39828706	H0-Merged-chr4-39828449-1
chr17	65426713	65427438	H0-Merged-chr17-65427075-1
chr2	206234686	206235288	H0-Merged-chr2-206234987-1
chr2	206255738	206256014	H0-Merged-chr2-206255876-1
chr4	40174715	40175265	H0-Merged-chr4-40174990-1
chr17	65611682	65612073	H0-Merged-chr17-65611877-1
chr17	34142924	34143150	H0-Merged-chr17-34143037-1
chr2	206502299	206502487	H0-Merged-chr2-206502393-1
chr1	40804301	40804800	H0-Merged-chr1-40804550-1
chr1	40848923	40849121	H0-Merged-chr1-40849022-1
chr4	40553686	40553976	H0-Merged-chr4-40553831-1
chr13	77124129	77124315	H0-Merged-chr13-77124222-1
chr17	65842378	65843073	H0-Merged-chr17-65842725-1
chr17	65908868	65909098	H0-Merged-chr17-65908983-1
chr1	94119396	94120067	H0-Merged-chr1-94119731-1
chr1	94124541	94125050	H0-Merged-chr1-94124795-1
chr4	140471278	140471516	H0-Merged-chr4-140471397-1
chr17	34296844	34297124	H0-Merged-chr17-34296984-1
chr2	206586629	206587174	H0-Merged-chr2-206586901-1
chr12	124313263	124313821	H0-Merged-chr12-124313542-1
chr17	66009465	66009681	H0-Merged-chr17-66009573-1
chr1	94262035	94262806	H0-Merged-chr1-94262420-1
chr13	77436168	77436360	H0-Merged-chr13-77436264-1
chr20	11523841	11524422	H0-Merged-chr20-11524131-1
chr1	94482903	94483226	H0-Merged-chr1-94483064-1
chr17	34960534	34960779	H0-Merged-chr17-34960656-1
chr13	77758843	77759038	H0-Merged-chr13-77758940-1
chr17	35326031	35326216	H0-Merged-chr17-35326123-1
chr1	41528886	41529072	H0-Merged-chr1-41528979-1
chr12	124881461	124883217	H0-Merged-chr12-124882339-1
chr13	78088218	78088403	H0-Merged-chr13-78088310-1
chr17	66392524	66393065	H0-Merged-chr17-66392794-1
chr1	41823552	41823780	H0-Merged-chr1-41823666-1
chr1	94677509	94677837	H0-Merged-chr1-94677673-1
chr1	41958753	41959203	H0-Merged-chr1-41958978-1
chr13	79199831	79200120	H0-Merged-chr13-79199975-1
chr1	94715744	94716037	H0-Merged-chr1-94715890-1
chr1	42010299	42011006	H0-Merged-chr1-42010652-1
chr1	42232430	42232724	H0-Merged-chr1-42232577-1
chr9	117449970	117450155	H0-Merged-chr9-117450062-1
chr9	35836785	35837386	H0-Merged-chr9-35837085-1
chr9	35865191	35865813	H0-Merged-chr9-35865502-1
chr9	35947486	35948010	H0-Merged-chr9-35947748-1
chr9	119139289	119139861	H0-Merged-chr9-119139575-1
chr9	36161163	36161661	H0-Merged-chr9-36161412-1
chr6	90553652	90554368	H0-Merged-chr6-90554010-1
chr6	90695561	90695913	H0-Merged-chr6-90695737-1
chr9	121284618	121284807	H0-Merged-chr9-121284712-1
chr6	27863931	27864116	H0-Merged-chr6-27864023-1
chr3	148737750	148738303	H0-Merged-chr3-148738026-1
chr9	123461235	123461988	H0-Merged-chr9-123461611-1
chr6	93183990	93184175	H0-Merged-chr6-93184082-1
chr3	66489238	66489579	H0-Merged-chr3-66489408-1
chr16	4713545	4714296	H0-Merged-chr16-4713920-1
chr16	4793569	4793787	H0-Merged-chr16-4793678-1
chr6	93687912	93688121	H0-Merged-chr6-93688016-1
chr6	93958358	93958586	H0-Merged-chr6-93958472-1
chr9	123711100	123711413	H0-Merged-chr9-123711256-1
chr3	67534464	67534707	H0-Merged-chr3-67534585-1
chr6	28565154	28565901	H0-Merged-chr6-28565527-1
chr11	128647591	128647912	H0-Merged-chr11-128647751-1
chr11	128689174	128689456	H0-Merged-chr11-128689315-1
chr2	101347704	101348513	H0-Merged-chr2-101348108-1
chr16	8935765	8935997	H0-Merged-chr16-8935881-1
chr2	45433976	45434450	H0-Merged-chr2-45434213-1
chr3	67644061	67644478	H0-Merged-chr3-67644269-1
chr9	37922598	37922783	H0-Merged-chr9-37922690-1
chr3	69099132	69099390	H0-Merged-chr3-69099261-1
chr3	69142606	69143961	H0-Merged-chr3-69143283-1
chr16	9102559	9102997	H0-Merged-chr16-9102778-1
chr11	129706552	129706941	H0-Merged-chr11-129706746-1
chr2	101596700	101597106	H0-Merged-chr2-101596903-1
chr6	29593397	29593645	H0-Merged-chr6-29593521-1
chr11	129891151	129891400	H0-Merged-chr11-129891275-1
chr2	45881051	45881735	H0-Merged-chr2-45881393-1
chr2	101731385	101731590	H0-Merged-chr2-101731487-1
chr11	129946664	129946849	H0-Merged-chr11-129946756-1
chr2	101763447	101763637	H0-Merged-chr2-101763542-1
chr16	10349425	10349735	H0-Merged-chr16-10349580-1
chr2	46066910	46067201	H0-Merged-chr2-46067055-1
chr11	130132021	130132311	H0-Merged-chr11-130132166-1
chr16	10848728	10849148	H0-Merged-chr16-10848938-1
chr16	11063598	11064092	H0-Merged-chr16-11063845-1
chr2	102219019	102219684	H0-Merged-chr2-102219351-1
chr2	102241529	102241720	H0-Merged-chr2-102241624-1
chr8	13109741	13109954	H0-Merged-chr8-13109847-1
chr8	13153480	13153805	H0-Merged-chr8-13153642-1
chr21	44153138	44153393	H0-Merged-chr21-44153265-1
chr5	73029794	73030084	H0-Merged-chr5-73029939-1
chr21	44406406	44406642	H0-Merged-chr21-44406524-1
chr5	139664723	139665874	H0-Merged-chr5-139665298-1
chr21	44558765	44559084	H0-Merged-chr21-44558924-1
chr5	73213513	73213845	H0-Merged-chr5-73213679-1
chr18	77580155	77580497	H0-Merged-chr18-77580326-1
chr18	77861420	77861653	H0-Merged-chr18-77861536-1
chr14	77773707	77773892	H0-Merged-chr14-77773799-1
chr14	77809208	77809814	H0-Merged-chr14-77809511-1
chr5	139801156	139801751	H0-Merged-chr5-139801453-1
chr5	73629109	73629488	H0-Merged-chr5-73629298-1
chr5	73652238	73653235	H0-Merged-chr5-73652736-1
chr8	17101844	17102373	H0-Merged-chr8-17102108-1
chr8	17108518	17108704	H0-Merged-chr8-17108611-1
chr10	122164	122991	H0-Merged-chr10-122577-1
chr1	201625372	201625887	H0-Merged-chr1-201625629-1
chr8	90577465	90577918	H0-Merged-chr8-90577691-1
chr5	73814045	73815024	H0-Merged-chr5-73814534-1
chr8	90624984	90625298	H0-Merged-chr8-90625141-1
chr8	17218078	17218318	H0-Merged-chr8-17218198-1
chr8	17280041	17280255	H0-Merged-chr8-17280148-1
chr8	17388005	17388261	H0-Merged-chr8-17388133-1
chr21	45280493	45280824	H0-Merged-chr21-45280658-1
chr21	45378345	45378573	H0-Merged-chr21-45378459-1
chr10	821558	821768	H0-Merged-chr10-821663-1
chr19	937018	937524	H0-Merged-chr19-937271-1
chr8	90910872	90911652	H0-Merged-chr8-90911262-1
chr10	129710261	129710996	H0-Merged-chr10-129710628-1
chr19	952992	953312	H0-Merged-chr19-953152-1
chr1	201845215	201845403	H0-Merged-chr1-201845309-1
chr10	2964429	2965697	H0-Merged-chr10-2965063-1
chr14	79885123	79885320	H0-Merged-chr14-79885221-1
chr14	79942502	79942750	H0-Merged-chr14-79942626-1
chr19	1082516	1082737	H0-Merged-chr19-1082626-1
chr14	80265955	80266171	H0-Merged-chr14-80266063-1
chr14	80776561	80776746	H0-Merged-chr14-80776653-1
chr5	141068555	141068740	H0-Merged-chr5-141068647-1
chr19	1192884	1193069	H0-Merged-chr19-1192976-1
chr10	130901347	130901771	H0-Merged-chr10-130901559-1
chr1	202274257	202274542	H0-Merged-chr1-202274399-1
chr10	3500077	3500733	H0-Merged-chr10-3500405-1
chr1	202587555	202587852	H0-Merged-chr1-202587703-1
chr10	134133865	134134225	H0-Merged-chr10-134134045-1
chr14	86010596	86011243	H0-Merged-chr14-86010919-1
chr1	202968675	202968926	H0-Merged-chr1-202968800-1
chr10	134252789	134253021	H0-Merged-chr10-134252905-1
chr10	134360429	134360761	H0-Merged-chr10-134360595-1
chr10	134410296	134410596	H0-Merged-chr10-134410446-1
chr10	134468559	134468744	H0-Merged-chr10-134468651-1
chrX	135994259	135994697	H0-Merged-chrX-135994478-1
chrX	138974170	138974730	H0-Merged-chrX-138974450-1
chr7	20588644	20589055	H0-Merged-chr7-20588849-1
chr7	20630826	20631389	H0-Merged-chr7-20631107-1
chr4	40921873	40922684	H0-Merged-chr4-40922278-1
chr7	21490633	21491108	H0-Merged-chr7-21490870-1
chr4	40999003	40999350	H0-Merged-chr4-40999176-1
chrX	149429196	149429397	H0-Merged-chrX-149429296-1
chr4	41072062	41072661	H0-Merged-chr4-41072361-1
chr4	41079732	41079954	H0-Merged-chr4-41079843-1
chr4	41086951	41087235	H0-Merged-chr4-41087093-1
chr7	21988554	21988935	H0-Merged-chr7-21988744-1
chr12	125010129	125010314	H0-Merged-chr12-125010221-1
chr12	125043999	125044823	H0-Merged-chr12-125044411-1
chr17	35763646	35764043	H0-Merged-chr17-35763844-1
chr4	41365600	41365951	H0-Merged-chr4-41365775-1
chr12	125045580	125046343	H0-Merged-chr12-125045961-1
chr4	41558106	41558367	H0-Merged-chr4-41558236-1
chr12	125235309	125235697	H0-Merged-chr12-125235503-1
chr12	125256211	125256804	H0-Merged-chr12-125256507-1
chr17	36408717	36409052	H0-Merged-chr17-36408884-1
chr4	42422244	42422911	H0-Merged-chr4-42422577-1
chr12	125350818	125351058	H0-Merged-chr12-125350938-1
chr12	125352123	125352384	H0-Merged-chr12-125352253-1
chr1	95378054	95378264	H0-Merged-chr1-95378159-1
chr17	36588901	36589260	H0-Merged-chr17-36589080-1
chr1	95386671	95387014	H0-Merged-chr1-95386842-1
chr4	47513786	47514690	H0-Merged-chr4-47514238-1
chr4	47928973	47929230	H0-Merged-chr4-47929101-1
chr12	125815415	125815953	H0-Merged-chr12-125815684-1
chr1	95550283	95550574	H0-Merged-chr1-95550428-1
chr12	129276999	129277636	H0-Merged-chr12-129277317-1
chr1	96880138	96880379	H0-Merged-chr1-96880258-1
chr17	37000741	37001001	H0-Merged-chr17-37000871-1
chr2	210964771	210965036	H0-Merged-chr2-210964903-1
chr1	43398864	43399075	H0-Merged-chr1-43398969-1
chr1	97206918	97207103	H0-Merged-chr1-97207010-1
chr1	97211407	97212255	H0-Merged-chr1-97211831-1
chr1	97328925	97329295	H0-Merged-chr1-97329110-1
chr1	97471919	97472104	H0-Merged-chr1-97472011-1
chr17	37047275	37047964	H0-Merged-chr17-37047619-1
chr1	43426759	43427341	H0-Merged-chr1-43427050-1
chr1	43429257	43429575	H0-Merged-chr1-43429416-1
chr1	43505288	43505778	H0-Merged-chr1-43505533-1
chr12	132317145	132317603	H0-Merged-chr12-132317374-1
chr17	37312883	37313472	H0-Merged-chr17-37313177-1
chr1	98567789	98568186	H0-Merged-chr1-98567987-1
chr1	98821337	98821972	H0-Merged-chr1-98821654-1
chr9	38339195	38339438	H0-Merged-chr9-38339316-1
chr9	38486145	38486334	H0-Merged-chr9-38486239-1
chr9	38515880	38516519	H0-Merged-chr9-38516199-1
chr6	30431840	30432073	H0-Merged-chr6-30431956-1
chr9	40106317	40106573	H0-Merged-chr9-40106445-1
chr2	46361338	46361711	H0-Merged-chr2-46361524-1
chr16	11352874	11353118	H0-Merged-chr16-11352996-1
chr2	46411689	46412430	H0-Merged-chr2-46412059-1
chr11	131685249	131685884	H0-Merged-chr11-131685566-1
chr2	46527316	46528671	H0-Merged-chr2-46527993-1
chr16	11887859	11888142	H0-Merged-chr16-11888000-1
chr3	71327079	71327264	H0-Merged-chr3-71327171-1
chr9	42665470	42665917	H0-Merged-chr9-42665693-1
chr11	132028653	132028924	H0-Merged-chr11-132028788-1
chr11	133705167	133705663	H0-Merged-chr11-133705415-1
chr16	12120946	12121301	H0-Merged-chr16-12121123-1
chr16	12470080	12471210	H0-Merged-chr16-12470645-1
chr3	71733730	71734274	H0-Merged-chr3-71734002-1
chr12	279300	279626	H0-Merged-chr12-279463-1
chr12	382252	382811	H0-Merged-chr12-382531-1
chr12	489083	489321	H0-Merged-chr12-489202-1
chr16	12645984	12646183	H0-Merged-chr16-12646083-1
chr3	72211340	72211743	H0-Merged-chr3-72211541-1
chr16	12847315	12847894	H0-Merged-chr16-12847604-1
chr12	916297	917039	H0-Merged-chr12-916668-1
chr5	74635437	74635635	H0-Merged-chr5-74635536-1
chr5	74831991	74832176	H0-Merged-chr5-74832083-1
chr8	18590061	18590254	H0-Merged-chr8-18590157-1
chr21	45665540	45665840	H0-Merged-chr21-45665690-1
chr21	46050107	46050306	H0-Merged-chr21-46050206-1
chr21	46184901	46185155	H0-Merged-chr21-46185028-1
chr21	46185970	46186158	H0-Merged-chr21-46186064-1
chr5	76007284	76007818	H0-Merged-chr5-76007551-1
chr19	1312340	1312621	H0-Merged-chr19-1312480-1
chr19	1357597	1357782	H0-Merged-chr19-1357689-1
chr5	76024512	76024849	H0-Merged-chr5-76024680-1
chr5	76116810	76117067	H0-Merged-chr5-76116938-1
chr14	88490035	88490298	H0-Merged-chr14-88490166-1
chr14	89023761	89023977	H0-Merged-chr14-89023869-1
chr19	1561323	1561508	H0-Merged-chr19-1561415-1
chr21	46470884	46471521	H0-Merged-chr21-46471202-1
chr5	76429750	76430119	H0-Merged-chr5-76429934-1
chr8	19484870	19485200	H0-Merged-chr8-19485035-1
chr14	89066176	89066730	H0-Merged-chr14-89066453-1
chr1	203338154	203338654	H0-Merged-chr1-203338404-1
chr21	46571571	46572338	H0-Merged-chr21-46571954-1
chr21	46574718	46575062	H0-Merged-chr21-46574890-1
chr10	4005555	4005874	H0-Merged-chr10-4005714-1
chr14	89679408	89679593	H0-Merged-chr14-89679500-1
chr14	89853066	89853523	H0-Merged-chr14-89853294-1
chr1	203490264	203490696	H0-Merged-chr1-203490480-1
chr1	203553485	203553677	H0-Merged-chr1-203553581-1
chr1	203591537	203592107	H0-Merged-chr1-203591822-1
chr14	90054483	90054990	H0-Merged-chr14-90054736-1
chr14	90377647	90377832	H0-Merged-chr14-90377739-1
chr14	90385191	90385863	H0-Merged-chr14-90385527-1
chr11	406305	406631	H0-Merged-chr11-406468-1
chr10	4679846	4680660	H0-Merged-chr10-4680253-1
chr11	475066	475454	H0-Merged-chr11-475260-1
chr11	497345	497900	H0-Merged-chr11-497622-1
chr1	204037768	204038121	H0-Merged-chr1-204037944-1
chr11	579435	579969	H0-Merged-chr11-579702-1
chr1	204092032	204092411	H0-Merged-chr1-204092221-1
chr1	204224796	204225400	H0-Merged-chr1-204225098-1
chr1	204263207	204263596	H0-Merged-chr1-204263401-1
chr14	91222943	91223161	H0-Merged-chr14-91223052-1
chr14	91248920	91249604	H0-Merged-chr14-91249262-1
chr1	204296754	204297020	H0-Merged-chr1-204296887-1
chr10	5625880	5626699	H0-Merged-chr10-5626289-1
chr11	995450	995937	H0-Merged-chr11-995693-1
chrX	152955341	152955616	H0-Merged-chrX-152955478-1
chrX	153314276	153315597	H0-Merged-chrX-153314936-1
chr4	48567926	48568239	H0-Merged-chr4-48568082-1
chr4	48694458	48694726	H0-Merged-chr4-48694592-1
chr4	48748698	48749051	H0-Merged-chr4-48748874-1
chrX	153675255	153675945	H0-Merged-chrX-153675600-1
chr7	24643194	24643819	H0-Merged-chr7-24643506-1
chr12	78234458	78235352	H0-Merged-chr12-78234905-1
chr17	37359909	37360373	H0-Merged-chr17-37360141-1
chr4	48916852	48917037	H0-Merged-chr4-48916944-1
chr12	132638663	132638983	H0-Merged-chr12-132638823-1
chr12	132702690	132703166	H0-Merged-chr12-132702928-1
chr4	53514137	53514489	H0-Merged-chr4-53514313-1
chrY	126563	126767	H0-Merged-chrY-126665-1
chr12	133174276	133174514	H0-Merged-chr12-133174395-1
chr2	216435832	216436039	H0-Merged-chr2-216435935-1
chr2	216500332	216500706	H0-Merged-chr2-216500519-1
chr4	53778011	53778202	H0-Merged-chr4-53778106-1
chr4	53914760	53915737	H0-Merged-chr4-53915248-1
chr12	133277539	133278214	H0-Merged-chr12-133277876-1
chr12	80065570	80065957	H0-Merged-chr12-80065763-1
chr17	37960580	37961064	H0-Merged-chr17-37960822-1
chr2	216640922	216641218	H0-Merged-chr2-216641070-1
chr1	44356451	44357038	H0-Merged-chr1-44356744-1
chr2	216683769	216684014	H0-Merged-chr2-216683891-1
chr17	38115212	38115626	H0-Merged-chr17-38115419-1
chr1	44448237	44448928	H0-Merged-chr1-44448582-1
chr17	38261099	38261614	H0-Merged-chr17-38261356-1
chr2	216921288	216921473	H0-Merged-chr2-216921380-1
chr17	38336210	38336459	H0-Merged-chr17-38336334-1
chr1	100530396	100531481	H0-Merged-chr1-100530938-1
chr1	100735067	100735426	H0-Merged-chr1-100735246-1
chr1	45125808	45126576	H0-Merged-chr1-45126192-1
chr1	45188893	45189318	H0-Merged-chr1-45189105-1
chr13	21252450	21252844	H0-Merged-chr13-21252647-1
chr1	100778947	100779182	H0-Merged-chr1-100779064-1
chr1	100904494	100904679	H0-Merged-chr1-100904586-1
chr12	86303446	86303749	H0-Merged-chr12-86303597-1
chr17	38677404	38678015	H0-Merged-chr17-38677709-1
chr1	45825853	45826669	H0-Merged-chr1-45826261-1
chr9	43376673	43377280	H0-Merged-chr9-43376976-1
chr9	46113576	46113761	H0-Merged-chr9-46113668-1
chr6	31198186	31198391	H0-Merged-chr6-31198288-1
chr6	31380110	31380296	H0-Merged-chr6-31380203-1
chr9	65596938	65597335	H0-Merged-chr9-65597136-1
chr2	47406620	47406828	H0-Merged-chr2-47406724-1
chr9	66379894	66380436	H0-Merged-chr9-66380165-1
chr2	47459776	47460555	H0-Merged-chr2-47460165-1
chr15	72963240	72963586	H0-Merged-chr15-72963413-1
chr3	73052435	73053077	H0-Merged-chr3-73052756-1
chr15	73922520	73922707	H0-Merged-chr15-73922613-1
chr15	73928471	73929224	H0-Merged-chr15-73928847-1
chr3	75429318	75429579	H0-Merged-chr3-75429448-1
chr15	73983982	73984366	H0-Merged-chr15-73984174-1
chr2	48013077	48013262	H0-Merged-chr2-48013169-1
chr3	78787156	78787430	H0-Merged-chr3-78787293-1
chr3	79417238	79417761	H0-Merged-chr3-79417499-1
chr2	48544274	48544564	H0-Merged-chr2-48544419-1
chr12	1598085	1598905	H0-Merged-chr12-1598495-1
chr12	1684694	1684961	H0-Merged-chr12-1684827-1
chr16	14766461	14766646	H0-Merged-chr16-14766553-1
chr16	14823837	14824612	H0-Merged-chr16-14824224-1
chr15	74346078	74346804	H0-Merged-chr15-74346441-1
chr3	81600665	81601147	H0-Merged-chr3-81600906-1
chr6	32079362	32079788	H0-Merged-chr6-32079575-1
chr12	1720773	1721429	H0-Merged-chr12-1721101-1
chr16	15053599	15054154	H0-Merged-chr16-15053876-1
chr11	75529564	75530687	H0-Merged-chr11-75530125-1
chr15	74583542	74584247	H0-Merged-chr15-74583894-1
chr6	32142314	32143412	H0-Merged-chr6-32142863-1
chr12	1889740	1890292	H0-Merged-chr12-1890016-1
chr11	75716973	75717598	H0-Merged-chr11-75717285-1
chr15	74823237	74823719	H0-Merged-chr15-74823478-1
chr11	75777546	75778608	H0-Merged-chr11-75778077-1
chr11	75867118	75867548	H0-Merged-chr11-75867333-1
chr19	58894930	58895164	H0-Merged-chr19-58895047-1
chr12	2935858	2936080	H0-Merged-chr12-2935969-1
chr12	3005009	3005201	H0-Merged-chr12-3005105-1
chr16	15701614	15701809	H0-Merged-chr16-15701711-1
chr15	75092317	75092541	H0-Merged-chr15-75092429-1
chr12	3113157	3113908	H0-Merged-chr12-3113532-1
chr11	76388232	76388430	H0-Merged-chr11-76388331-1
chr12	3243767	3244700	H0-Merged-chr12-3244233-1
chr11	76446385	76446711	H0-Merged-chr11-76446548-1
chr5	486545	486730	H0-Merged-chr5-486637-1
chr8	21976539	21976823	H0-Merged-chr8-21976681-1
chr5	671654	672117	H0-Merged-chr5-671885-1
chr5	78136587	78137120	H0-Merged-chr5-78136853-1
chr21	47709735	47710005	H0-Merged-chr21-47709870-1
chr5	1479655	1480165	H0-Merged-chr5-1479910-1
chr8	22300758	22301812	H0-Merged-chr8-22301285-1
chr21	47788543	47788832	H0-Merged-chr21-47788687-1
chr19	2636903	2637435	H0-Merged-chr19-2637169-1
chr5	80355949	80356192	H0-Merged-chr5-80356070-1
chr5	80490641	80490998	H0-Merged-chr5-80490819-1
chr18	8656219	8656418	H0-Merged-chr18-8656318-1
chr19	2953082	2953440	H0-Merged-chr19-2953261-1
chr14	30393895	30394748	H0-Merged-chr14-30394321-1
chr18	8717114	8717539	H0-Merged-chr18-8717326-1
chr8	22840042	22840557	H0-Merged-chr8-22840299-1
chr5	6770202	6770404	H0-Merged-chr5-6770303-1
chr19	3025244	3025465	H0-Merged-chr19-3025354-1
chr5	81285043	81285246	H0-Merged-chr5-81285144-1
chr14	31095049	31095929	H0-Merged-chr14-31095489-1
chr18	8963284	8963758	H0-Merged-chr18-8963521-1
chr20	45966416	45967025	H0-Merged-chr20-45966720-1
chr20	45971248	45971811	H0-Merged-chr20-45971529-1
chr5	8849492	8850125	H0-Merged-chr5-8849808-1
chr8	22943708	22943898	H0-Merged-chr8-22943803-1
chr10	5936015	5936454	H0-Merged-chr10-5936234-1
chr19	3125789	3126375	H0-Merged-chr19-3126082-1
chr22	18472040	18472281	H0-Merged-chr22-18472160-1
chr10	83632231	83632646	H0-Merged-chr10-83632438-1
chr14	31601260	31601504	H0-Merged-chr14-31601382-1
chr18	9005236	9005691	H0-Merged-chr18-9005463-1
chr18	9008769	9009343	H0-Merged-chr18-9009056-1
chr18	9084176	9084389	H0-Merged-chr18-9084282-1
chr5	10301906	10302414	H0-Merged-chr5-10302160-1
chr8	22974178	22974639	H0-Merged-chr8-22974408-1
chr14	91859149	91859482	H0-Merged-chr14-91859315-1
chr19	3209347	3209561	H0-Merged-chr19-3209454-1
chr19	3244324	3244974	H0-Merged-chr19-3244649-1
chr8	23109118	23109795	H0-Merged-chr8-23109456-1
chr22	18760735	18761122	H0-Merged-chr22-18760928-1
chr20	46391876	46392229	H0-Merged-chr20-46392052-1
chr11	2387911	2388096	H0-Merged-chr11-2388003-1
chr10	86113760	86114557	H0-Merged-chr10-86114158-1
chr10	86163854	86164356	H0-Merged-chr10-86164105-1
chr20	46556445	46556654	H0-Merged-chr20-46556549-1
chr11	2785547	2785755	H0-Merged-chr11-2785651-1
chr10	86294631	86294984	H0-Merged-chr10-86294807-1
chr18	9670792	9671507	H0-Merged-chr18-9671149-1
chr10	6540660	6541090	H0-Merged-chr10-6540875-1
chr10	6730804	6731217	H0-Merged-chr10-6731010-1
chr11	2961692	2962114	H0-Merged-chr11-2961903-1
chr19	3718892	3719164	H0-Merged-chr19-3719028-1
chr19	3812228	3812500	H0-Merged-chr19-3812364-1
chr18	9803659	9804482	H0-Merged-chr18-9804070-1
chr18	9871231	9871416	H0-Merged-chr18-9871323-1
chr10	7826993	7827573	H0-Merged-chr10-7827283-1
chr11	3120835	3121020	H0-Merged-chr11-3120927-1
chr1	205777953	205778172	H0-Merged-chr1-205778062-1
chr10	88636443	88637296	H0-Merged-chr10-88636869-1
chr14	93474573	93475035	H0-Merged-chr14-93474804-1
chr14	34697132	34697329	H0-Merged-chr14-34697230-1
chr1	206125622	206126252	H0-Merged-chr1-206125937-1
chr10	89198728	89198932	H0-Merged-chr10-89198830-1
chr10	89209377	89209613	H0-Merged-chr10-89209495-1
chr10	89278360	89278912	H0-Merged-chr10-89278636-1
chr11	3810842	3811369	H0-Merged-chr11-3811105-1
chr10	89451362	89451660	H0-Merged-chr10-89451511-1
chr9	140224141	140224625	H0-Merged-chr9-140224383-1
chr9	140355993	140356252	H0-Merged-chr9-140356122-1
chr9	140599786	140600127	H0-Merged-chr9-140599956-1
chr9	140610013	140610955	H0-Merged-chr9-140610484-1
chr4	54919496	54920171	H0-Merged-chr4-54919833-1
chr3	185442767	185443237	H0-Merged-chr3-185443002-1
chr9	140617713	140618571	H0-Merged-chr9-140618142-1
chr6	144027404	144028059	H0-Merged-chr6-144027731-1
chrUn_gl000212	104982	105168	H0-Merged-chrUn_gl000212-105075-1
chrUn_gl000217	45082	45372	H0-Merged-chrUn_gl000217-45227-1
chr4	55063244	55063527	H0-Merged-chr4-55063385-1
chr3	185458790	185459571	H0-Merged-chr3-185459180-1
chrUn_gl000223	118461	118809	H0-Merged-chrUn_gl000223-118635-1
chr2	217226252	217226437	H0-Merged-chr2-217226344-1
chr3	185493782	185494008	H0-Merged-chr3-185493895-1
chr3	185500503	185501204	H0-Merged-chr3-185500853-1
chrUn_gl000223	150812	151178	H0-Merged-chrUn_gl000223-150995-1
chrX	284450	284672	H0-Merged-chrX-284561-1
chr7	27686736	27686937	H0-Merged-chr7-27686836-1
chr3	185625439	185625740	H0-Merged-chr3-185625589-1
chrX	1507620	1507812	H0-Merged-chrX-1507716-1
chrX	1509261	1509446	H0-Merged-chrX-1509353-1
chr12	87720074	87720471	H0-Merged-chr12-87720272-1
chr17	38776300	38776596	H0-Merged-chr17-38776448-1
chr7	28057261	28057778	H0-Merged-chr7-28057519-1
chr2	152682353	152682679	H0-Merged-chr2-152682516-1
chr6	144680339	144680567	H0-Merged-chr6-144680453-1
chr12	88639946	88640131	H0-Merged-chr12-88640038-1
chr12	89027742	89028091	H0-Merged-chr12-89027916-1
chr7	28163568	28164014	H0-Merged-chr7-28163791-1
chr17	1160125	1160310	H0-Merged-chr17-1160217-1
chr2	152775205	152776028	H0-Merged-chr2-152775616-1
chr3	186332547	186333360	H0-Merged-chr3-186332953-1
chr2	152883696	152884143	H0-Merged-chr2-152883919-1
chr13	21711857	21712196	H0-Merged-chr13-21712026-1
chrX	2673537	2673868	H0-Merged-chrX-2673702-1
chrX	2683325	2683888	H0-Merged-chrX-2683606-1
chr17	39695100	39695451	H0-Merged-chr17-39695275-1
chr2	218060411	218060676	H0-Merged-chr2-218060543-1
chr2	218182004	218182323	H0-Merged-chr2-218182163-1
chr4	56160872	56161827	H0-Merged-chr4-56161349-1
chr17	1278692	1279171	H0-Merged-chr17-1278931-1
chr3	186539521	186540638	H0-Merged-chr3-186540079-1
chr2	153222632	153223330	H0-Merged-chr2-153222981-1
chr6	144996314	144996637	H0-Merged-chr6-144996475-1
chr13	22016622	22016807	H0-Merged-chr13-22016714-1
chr6	145298297	145298696	H0-Merged-chr6-145298496-1
chr12	89492505	89492811	H0-Merged-chr12-89492658-1
chr1	46052624	46053749	H0-Merged-chr1-46053186-1
chr4	56205598	56205949	H0-Merged-chr4-56205773-1
chr1	46137305	46137865	H0-Merged-chr1-46137585-1
chr17	1281897	1282661	H0-Merged-chr17-1282279-1
chr17	1286140	1286418	H0-Merged-chr17-1286279-1
chr3	186665729	186665973	H0-Merged-chr3-186665851-1
chr6	145994795	145995103	H0-Merged-chr6-145994949-1
chr1	46192918	46193397	H0-Merged-chr1-46193157-1
chr1	46309912	46310163	H0-Merged-chr1-46310037-1
chr17	1338911	1339134	H0-Merged-chr17-1339022-1
chr13	24062545	24062884	H0-Merged-chr13-24062714-1
chr2	153459487	153459775	H0-Merged-chr2-153459631-1
chr2	153480789	153481322	H0-Merged-chr2-153481055-1
chr13	24314889	24315112	H0-Merged-chr13-24315000-1
chr3	187467862	187468488	H0-Merged-chr3-187468175-1
chr1	108494747	108494974	H0-Merged-chr1-108494860-1
chr1	108667424	108668123	H0-Merged-chr1-108667773-1
chr2	219265955	219266830	H0-Merged-chr2-219266392-1
chr1	47109075	47109447	H0-Merged-chr1-47109261-1
chr1	109238271	109238457	H0-Merged-chr1-109238364-1
chr12	91149188	91149427	H0-Merged-chr12-91149307-1
chr17	40443359	40443980	H0-Merged-chr17-40443669-1
chr17	1875788	1876116	H0-Merged-chr17-1875952-1
chr1	47224971	47225309	H0-Merged-chr1-47225140-1
chr1	47640936	47641174	H0-Merged-chr1-47641055-1
chr1	47662505	47662692	H0-Merged-chr1-47662598-1
chr17	1961467	1961780	H0-Merged-chr17-1961623-1
chr1	47684821	47685149	H0-Merged-chr1-47684985-1
chr1	47802237	47802422	H0-Merged-chr1-47802329-1
chr1	47986790	47987188	H0-Merged-chr1-47986989-1
chr9	70481366	70481644	H0-Merged-chr9-70481505-1
chr8	131034785	131035241	H0-Merged-chr8-131035013-1
chr9	71685934	71686503	H0-Merged-chr9-71686218-1
chr8	131054583	131055168	H0-Merged-chr8-131054875-1
chr5	176461386	176462060	H0-Merged-chr5-176461723-1
chr8	131253187	131253396	H0-Merged-chr8-131253291-1
chr5	176564886	176565438	H0-Merged-chr5-176565162-1
chr6	32950876	32951214	H0-Merged-chr6-32951045-1
chr3	30645006	30645328	H0-Merged-chr3-30645167-1
chr3	30664123	30665984	H0-Merged-chr3-30665053-1
chr9	72290392	72291330	H0-Merged-chr9-72290861-1
chr16	15830674	15831179	H0-Merged-chr16-15830926-1
chr16	15838468	15839220	H0-Merged-chr16-15838844-1
chr15	75189526	75189714	H0-Merged-chr15-75189620-1
chr9	72359395	72360650	H0-Merged-chr9-72360022-1
chr9	72493866	72494362	H0-Merged-chr9-72494114-1
chr2	636804	637043	H0-Merged-chr2-636923-1
chr9	72664069	72664533	H0-Merged-chr9-72664301-1
chr12	3270990	3271471	H0-Merged-chr12-3271230-1
chr12	3285356	3285619	H0-Merged-chr12-3285487-1
chr5	177023214	177023474	H0-Merged-chr5-177023344-1
chr16	16108801	16109046	H0-Merged-chr16-16108923-1
chr8	131645469	131645654	H0-Merged-chr8-131645561-1
chr15	75403235	75403572	H0-Merged-chr15-75403403-1
chr15	75432433	75432663	H0-Merged-chr15-75432548-1
chr15	75474366	75474905	H0-Merged-chr15-75474635-1
chr15	75509501	75509935	H0-Merged-chr15-75509718-1
chr6	33560239	33561378	H0-Merged-chr6-33560808-1
chr3	31144877	31145459	H0-Merged-chr3-31145168-1
chr8	131820879	131821262	H0-Merged-chr8-131821070-1
chr3	99340233	99341257	H0-Merged-chr3-99340745-1
chr9	73045922	73046545	H0-Merged-chr9-73046233-1
chr3	31159532	31159734	H0-Merged-chr3-31159633-1
chr5	177577848	177578118	H0-Merged-chr5-177577983-1
chr5	177654319	177655041	H0-Merged-chr5-177654680-1
chr8	132918420	132919038	H0-Merged-chr8-132918729-1
chr16	18808474	18808659	H0-Merged-chr16-18808566-1
chr11	76963210	76964304	H0-Merged-chr11-76963757-1
chr11	77088020	77088321	H0-Merged-chr11-77088170-1
chr6	33852859	33853066	H0-Merged-chr6-33852962-1
chr5	177661754	177662002	H0-Merged-chr5-177661878-1
chr5	177706837	177707372	H0-Merged-chr5-177707104-1
chr11	77271182	77271917	H0-Merged-chr11-77271549-1
chr6	34111610	34111814	H0-Merged-chr6-34111712-1
chr6	34131559	34131983	H0-Merged-chr6-34131771-1
chr6	34169878	34170063	H0-Merged-chr6-34169970-1
chr6	34196922	34197152	H0-Merged-chr6-34197037-1
chr3	32014663	32015022	H0-Merged-chr3-32014842-1
chr11	77500312	77500587	H0-Merged-chr11-77500449-1
chr2	55642523	55642888	H0-Merged-chr2-55642705-1
chr3	32377451	32377723	H0-Merged-chr3-32377587-1
chr12	6017765	6018124	H0-Merged-chr12-6017944-1
chr12	6035056	6035309	H0-Merged-chr12-6035182-1
chr12	6040293	6040513	H0-Merged-chr12-6040403-1
chr12	6053023	6053209	H0-Merged-chr12-6053116-1
chr12	6067695	6068245	H0-Merged-chr12-6067970-1
chr11	78509571	78510170	H0-Merged-chr11-78509870-1
chr8	23182135	23182544	H0-Merged-chr8-23182339-1
chr5	10711758	10712042	H0-Merged-chr5-10711900-1
chr5	10757532	10758009	H0-Merged-chr5-10757770-1
chr7	127295979	127296687	H0-Merged-chr7-127296333-1
chr5	86569580	86569989	H0-Merged-chr5-86569784-1
chr7	127446710	127446957	H0-Merged-chr7-127446833-1
chr7	127512011	127512441	H0-Merged-chr7-127512226-1
chr19	3828176	3828839	H0-Merged-chr19-3828507-1
chr19	3977073	3978039	H0-Merged-chr19-3977556-1
chr22	19602951	19603657	H0-Merged-chr22-19603304-1
chr7	127707859	127708124	H0-Merged-chr7-127707991-1
chr19	4069326	4069523	H0-Merged-chr19-4069424-1
chr5	88368942	88369216	H0-Merged-chr5-88369079-1
chr18	10159216	10159449	H0-Merged-chr18-10159332-1
chr18	10197087	10197441	H0-Merged-chr18-10197264-1
chr8	23747786	23748789	H0-Merged-chr8-23748287-1
chr14	93707331	93707816	H0-Merged-chr14-93707573-1
chr22	19855855	19856114	H0-Merged-chr22-19855984-1
chr14	34974736	34974960	H0-Merged-chr14-34974848-1
chr18	10560167	10560893	H0-Merged-chr18-10560530-1
chr5	14303165	14303437	H0-Merged-chr5-14303301-1
chr14	93770028	93770829	H0-Merged-chr14-93770428-1
chr14	93787727	93787957	H0-Merged-chr14-93787842-1
chr1	206164880	206165111	H0-Merged-chr1-206164995-1
chr20	47540936	47541334	H0-Merged-chr20-47541135-1
chr14	94487413	94487841	H0-Merged-chr14-94487627-1
chr19	4592833	4593609	H0-Merged-chr19-4593221-1
chr22	20107473	20107918	H0-Merged-chr22-20107695-1
chr10	89529483	89529668	H0-Merged-chr10-89529575-1
chr11	3940415	3941044	H0-Merged-chr11-3940729-1
chr7	128691513	128691698	H0-Merged-chr7-128691605-1
chr7	128858341	128858689	H0-Merged-chr7-128858515-1
chr22	20122091	20122404	H0-Merged-chr22-20122247-1
chr22	20151532	20151817	H0-Merged-chr22-20151674-1
chr22	20227028	20227388	H0-Merged-chr22-20227208-1
chr1	206561218	206561567	H0-Merged-chr1-206561392-1
chr5	92493766	92494485	H0-Merged-chr5-92494125-1
chr5	92615307	92615492	H0-Merged-chr5-92615399-1
chr18	12071678	12071980	H0-Merged-chr18-12071829-1
chr5	14726499	14726924	H0-Merged-chr5-14726711-1
chr20	47891101	47892406	H0-Merged-chr20-47891753-1
chr11	4154932	4155417	H0-Merged-chr11-4155174-1
chr7	128919836	128920224	H0-Merged-chr7-128920030-1
chr14	95503618	95504052	H0-Merged-chr14-95503835-1
chr14	95616612	95616797	H0-Merged-chr14-95616704-1
chr7	128925230	128925749	H0-Merged-chr7-128925489-1
chr10	90285678	90285873	H0-Merged-chr10-90285775-1
chr10	90409991	90410177	H0-Merged-chr10-90410084-1
chr14	35724237	35724904	H0-Merged-chr14-35724570-1
chr20	48007988	48008506	H0-Merged-chr20-48008247-1
chr11	5701065	5701250	H0-Merged-chr11-5701157-1
chr11	5703192	5703427	H0-Merged-chr11-5703309-1
chr14	95762776	95763387	H0-Merged-chr14-95763081-1
chr14	95780814	95781429	H0-Merged-chr14-95781121-1
chr19	4872759	4873716	H0-Merged-chr19-4873237-1
chr20	48247658	48248517	H0-Merged-chr20-48248087-1
chr14	95880200	95880482	H0-Merged-chr14-95880341-1
chr19	4988032	4988854	H0-Merged-chr19-4988443-1
chr1	206879050	206879279	H0-Merged-chr1-206879164-1
chr14	35857831	35858068	H0-Merged-chr14-35857949-1
chr11	6354773	6354978	H0-Merged-chr11-6354875-1
chr11	6436207	6436673	H0-Merged-chr11-6436440-1
chr14	95965292	95965732	H0-Merged-chr14-95965512-1
chr19	5641756	5642470	H0-Merged-chr19-5642113-1
chr10	91040097	91040378	H0-Merged-chr10-91040237-1
chr14	96029114	96029378	H0-Merged-chr14-96029246-1
chr14	96167804	96168017	H0-Merged-chr14-96167910-1
chr10	91216416	91216601	H0-Merged-chr10-91216508-1
chr1	207982704	207983544	H0-Merged-chr1-207983124-1
chr10	92644365	92644550	H0-Merged-chr10-92644457-1
chrX	3629192	3629452	H0-Merged-chrX-3629322-1
chr7	28912063	28912685	H0-Merged-chr7-28912374-1
chrX	9121556	9122067	H0-Merged-chrX-9121811-1
chr4	57192146	57192947	H0-Merged-chr4-57192546-1
chr3	187707558	187707910	H0-Merged-chr3-187707734-1
chr3	187866185	187866432	H0-Merged-chr3-187866308-1
chr3	187925166	187926293	H0-Merged-chr3-187925729-1
chr6	148454689	148455196	H0-Merged-chr6-148454942-1
chr6	148473197	148473648	H0-Merged-chr6-148473422-1
chr4	57779740	57780324	H0-Merged-chr4-57780032-1
chr7	29681218	29681628	H0-Merged-chr7-29681423-1
chr7	29986392	29986713	H0-Merged-chr7-29986552-1
chr2	158679557	158680423	H0-Merged-chr2-158679990-1
chr6	148560524	148561084	H0-Merged-chr6-148560804-1
chr6	148592222	148592407	H0-Merged-chr6-148592314-1
chrX	10032074	10032270	H0-Merged-chrX-10032172-1
chr2	158697309	158697538	H0-Merged-chr2-158697423-1
chr2	158706227	158706896	H0-Merged-chr2-158706561-1
chr12	92424509	92425100	H0-Merged-chr12-92424804-1
chr2	219703705	219704412	H0-Merged-chr2-219704058-1
chr3	188214105	188214425	H0-Merged-chr3-188214265-1
chr17	40691763	40691974	H0-Merged-chr17-40691868-1
chr12	92698565	92698764	H0-Merged-chr12-92698664-1
chr2	219974423	219975145	H0-Merged-chr2-219974784-1
chr2	159516348	159516573	H0-Merged-chr2-159516460-1
chr2	159576869	159577719	H0-Merged-chr2-159577294-1
chr6	148791527	148791935	H0-Merged-chr6-148791731-1
chr17	40758758	40758991	H0-Merged-chr17-40758874-1
chr12	93013818	93014003	H0-Merged-chr12-93013910-1
chr3	188645957	188646204	H0-Merged-chr3-188646080-1
chr13	27700263	27700748	H0-Merged-chr13-27700505-1
chr4	70670238	70670485	H0-Merged-chr4-70670361-1
chr4	71502447	71503171	H0-Merged-chr4-71502809-1
chr17	2527628	2528084	H0-Merged-chr17-2527856-1
chr17	2537474	2538150	H0-Merged-chr17-2537812-1
chr3	188647305	188647522	H0-Merged-chr3-188647413-1
chr2	159898950	159899174	H0-Merged-chr2-159899062-1
chr13	27831772	27832983	H0-Merged-chr13-27832377-1
chr13	27954159	27954562	H0-Merged-chr13-27954360-1
chr13	27978186	27978683	H0-Merged-chr13-27978434-1
chr13	28001956	28002141	H0-Merged-chr13-28002048-1
chr17	2855697	2856196	H0-Merged-chr17-2855946-1
chr13	28136626	28136813	H0-Merged-chr13-28136719-1
chr13	28198364	28198956	H0-Merged-chr13-28198660-1
chr17	41434514	41434699	H0-Merged-chr17-41434606-1
chr2	160494367	160494711	H0-Merged-chr2-160494539-1
chr13	28715259	28715444	H0-Merged-chr13-28715351-1
chr13	28755336	28755612	H0-Merged-chr13-28755474-1
chr17	3908172	3908357	H0-Merged-chr17-3908264-1
chr17	41662778	41662963	H0-Merged-chr17-41662870-1
chr1	52225802	52225987	H0-Merged-chr1-52225894-1
chr17	4012751	4012992	H0-Merged-chr17-4012871-1
chr1	2174628	2175210	H0-Merged-chr1-2174919-1
chr9	73244356	73244983	H0-Merged-chr9-73244669-1
chr9	74271035	74271520	H0-Merged-chr9-74271277-1
chr9	74380633	74380914	H0-Merged-chr9-74380773-1
chr6	34430420	34430605	H0-Merged-chr6-34430512-1
chr5	179163640	179164362	H0-Merged-chr5-179164001-1
chr2	7150936	7151657	H0-Merged-chr2-7151296-1
chr6	34553200	34553615	H0-Merged-chr6-34553407-1
chr9	75154037	75154339	H0-Merged-chr9-75154188-1
chr1	6208564	6208749	H0-Merged-chr1-6208656-1
chr5	179269961	179270263	H0-Merged-chr5-179270112-1
chr3	100116580	100117055	H0-Merged-chr3-100116817-1
chr9	75675976	75676349	H0-Merged-chr9-75676162-1
chr3	32471688	32472274	H0-Merged-chr3-32471981-1
chr1	6361504	6361745	H0-Merged-chr1-6361624-1
chr5	179640699	179640892	H0-Merged-chr5-179640795-1
chr8	135220569	135221059	H0-Merged-chr8-135220814-1
chr15	77375711	77376367	H0-Merged-chr15-77376039-1
chr15	77421475	77421893	H0-Merged-chr15-77421684-1
chr9	75886316	75886539	H0-Merged-chr9-75886427-1
chr5	179985161	179985472	H0-Merged-chr5-179985316-1
chr8	135642261	135642446	H0-Merged-chr8-135642353-1
chr16	20822189	20822382	H0-Merged-chr16-20822285-1
chr8	135703413	135703645	H0-Merged-chr8-135703529-1
chr3	100706960	100707159	H0-Merged-chr3-100707059-1
chr3	33192706	33193088	H0-Merged-chr3-33192897-1
chr6	35075569	35076173	H0-Merged-chr6-35075871-1
chr9	77812305	77812502	H0-Merged-chr9-77812403-1
chr9	78980562	78980805	H0-Merged-chr9-78980683-1
chr8	136483773	136484193	H0-Merged-chr8-136483983-1
chr5	180528572	180529131	H0-Merged-chr5-180528851-1
chr2	56514372	56515232	H0-Merged-chr2-56514802-1
chr2	57947952	57948378	H0-Merged-chr2-57948165-1
chr2	58235969	58236182	H0-Merged-chr2-58236075-1
chr11	82453838	82454048	H0-Merged-chr11-82453943-1
chr6	35186058	35186284	H0-Merged-chr6-35186171-1
chr3	101421789	101422399	H0-Merged-chr3-101422094-1
chr6	35247861	35248895	H0-Merged-chr6-35248378-1
chr12	6348300	6348897	H0-Merged-chr12-6348598-1
chr8	139703796	139704437	H0-Merged-chr8-139704116-1
chr8	140718432	140718617	H0-Merged-chr8-140718524-1
chr2	58237661	58237912	H0-Merged-chr2-58237786-1
chr8	141108464	141109104	H0-Merged-chr8-141108784-1
chr2	58384477	58384740	H0-Merged-chr2-58384608-1
chr2	9618227	9618932	H0-Merged-chr2-9618579-1
chr3	101515118	101515428	H0-Merged-chr3-101515273-1
chr6	35356633	35356857	H0-Merged-chr6-35356745-1
chr3	101575940	101576358	H0-Merged-chr3-101576149-1
chr5	180653188	180653376	H0-Merged-chr5-180653282-1
chr5	180660629	180660995	H0-Merged-chr5-180660812-1
chr11	82700271	82700484	H0-Merged-chr11-82700377-1
chr3	101861490	101862059	H0-Merged-chr3-101861774-1
chr3	36743006	36743648	H0-Merged-chr3-36743327-1
chr16	21946188	21946403	H0-Merged-chr16-21946295-1
chr2	61465298	61465492	H0-Merged-chr2-61465395-1
chr12	6739949	6740741	H0-Merged-chr12-6740345-1
chr8	26138290	26138483	H0-Merged-chr8-26138386-1
chr5	15286048	15286374	H0-Merged-chr5-15286211-1
chr7	129200905	129201400	H0-Merged-chr7-129201152-1
chr7	129234663	129235163	H0-Merged-chr7-129234913-1
chr5	15505235	15506437	H0-Merged-chr5-15505836-1
chr5	93938406	93938786	H0-Merged-chr5-93938596-1
chr5	94322279	94322464	H0-Merged-chr5-94322371-1
chr20	48287635	48287836	H0-Merged-chr20-48287735-1
chr5	15695433	15695618	H0-Merged-chr5-15695525-1
chr8	26243983	26244197	H0-Merged-chr8-26244090-1
chr20	48326014	48326277	H0-Merged-chr20-48326145-1
chr22	21144456	21144647	H0-Merged-chr22-21144551-1
chr5	94375826	94376039	H0-Merged-chr5-94375932-1
chr22	21276423	21276669	H0-Merged-chr22-21276546-1
chr5	15995434	15995950	H0-Merged-chr5-15995692-1
chr5	16461598	16462239	H0-Merged-chr5-16461918-1
chr7	129549107	129549342	H0-Merged-chr7-129549224-1
chr7	129582229	129582947	H0-Merged-chr7-129582588-1
chr7	129584454	129584700	H0-Merged-chr7-129584577-1
chr22	21297794	21298531	H0-Merged-chr22-21298162-1
chr7	129696355	129696750	H0-Merged-chr7-129696552-1
chr7	129715905	129716090	H0-Merged-chr7-129715997-1
chr22	21471236	21471421	H0-Merged-chr22-21471328-1
chr5	95003151	95003757	H0-Merged-chr5-95003454-1
chr5	16748330	16748560	H0-Merged-chr5-16748445-1
chr7	130003241	130003570	H0-Merged-chr7-130003405-1
chr19	6095525	6096033	H0-Merged-chr19-6095779-1
chr22	21898927	21899301	H0-Merged-chr22-21899114-1
chr18	13432086	13432668	H0-Merged-chr18-13432377-1
chr18	13445468	13445653	H0-Merged-chr18-13445560-1
chr7	130529738	130530213	H0-Merged-chr7-130529975-1
chr22	22053214	22053429	H0-Merged-chr22-22053321-1
chr1	208056126	208056317	H0-Merged-chr1-208056221-1
chr14	38911404	38911701	H0-Merged-chr14-38911552-1
chr18	13676699	13676999	H0-Merged-chr18-13676849-1
chr5	16944203	16944706	H0-Merged-chr5-16944454-1
chr20	48868427	48868809	H0-Merged-chr20-48868618-1
chr11	7686847	7687121	H0-Merged-chr11-7686984-1
chr19	6580430	6580866	H0-Merged-chr19-6580648-1
chr22	22204063	22204666	H0-Merged-chr22-22204364-1
chr18	15098662	15098847	H0-Merged-chr18-15098754-1
chr8	28060480	28060905	H0-Merged-chr8-28060692-1
chr20	48990390	48990869	H0-Merged-chr20-48990629-1
chr7	130778973	130779691	H0-Merged-chr7-130779332-1
chr19	6677654	6678348	H0-Merged-chr19-6678001-1
chr14	39864922	39865260	H0-Merged-chr14-39865091-1
chr14	39898845	39899033	H0-Merged-chr14-39898939-1
chr20	49072729	49073200	H0-Merged-chr20-49072964-1
chr7	130910384	130910625	H0-Merged-chr7-130910504-1
chr7	130916132	130916460	H0-Merged-chr7-130916296-1
chr22	22697993	22698459	H0-Merged-chr22-22698226-1
chr22	22996273	22996488	H0-Merged-chr22-22996380-1
chr14	45560414	45560710	H0-Merged-chr14-45560562-1
chr20	49077143	49077725	H0-Merged-chr20-49077434-1
chr14	100613479	100613908	H0-Merged-chr14-100613693-1
chr19	7401181	7402023	H0-Merged-chr19-7401602-1
chr20	49147627	49148370	H0-Merged-chr20-49147998-1
chr10	94480470	94480655	H0-Merged-chr10-94480562-1
chr14	50316982	50317907	H0-Merged-chr14-50317444-1
chr18	19790573	19791137	H0-Merged-chr18-19790855-1
chr11	9052088	9052423	H0-Merged-chr11-9052255-1
chr11	9152171	9152424	H0-Merged-chr11-9152297-1
chr10	94503962	94504172	H0-Merged-chr10-94504067-1
chr10	94544511	94545309	H0-Merged-chr10-94544910-1
chr1	209859168	209859544	H0-Merged-chr1-209859356-1
chr10	94611588	94611773	H0-Merged-chr10-94611680-1
chr11	9340220	9340992	H0-Merged-chr11-9340606-1
chr10	94800655	94802066	H0-Merged-chr10-94801360-1
chr10	94823701	94823921	H0-Merged-chr10-94823811-1
chrX	12437811	12438053	H0-Merged-chrX-12437932-1
chrX	13001701	13001919	H0-Merged-chrX-13001810-1
chr7	30958194	30958578	H0-Merged-chr7-30958386-1
chr7	31173983	31174652	H0-Merged-chr7-31174317-1
chr4	74120153	74120487	H0-Merged-chr4-74120320-1
chr7	32010414	32010710	H0-Merged-chr7-32010562-1
chrX	13685165	13685508	H0-Merged-chrX-13685336-1
chrX	14940581	14940880	H0-Merged-chrX-14940730-1
chrX	15466387	15466618	H0-Merged-chrX-15466502-1
chr2	160577503	160577688	H0-Merged-chr2-160577595-1
chr7	32840302	32840488	H0-Merged-chr7-32840395-1
chr3	192550397	192550582	H0-Merged-chr3-192550489-1
chr17	41811354	41811572	H0-Merged-chr17-41811463-1
chr4	75133205	75133686	H0-Merged-chr4-75133445-1
chr17	4240731	4242666	H0-Merged-chr17-4241698-1
chr6	151028602	151029035	H0-Merged-chr6-151028818-1
chr3	192610413	192610917	H0-Merged-chr3-192610665-1
chr12	94978079	94978486	H0-Merged-chr12-94978282-1
chr12	94995202	94995426	H0-Merged-chr12-94995314-1
chr2	224353752	224353961	H0-Merged-chr2-224353856-1
chr13	29077331	29077646	H0-Merged-chr13-29077488-1
chr13	29122792	29123021	H0-Merged-chr13-29122906-1
chrX	16650960	16651389	H0-Merged-chrX-16651174-1
chrX	16652814	16653033	H0-Merged-chrX-16652923-1
chr13	29153199	29153768	H0-Merged-chr13-29153483-1
chr2	224632761	224632946	H0-Merged-chr2-224632853-1
chr3	193319141	193319725	H0-Merged-chr3-193319433-1
chr2	161184633	161185234	H0-Merged-chr2-161184933-1
chr3	193523352	193523577	H0-Merged-chr3-193523464-1
chr13	29212552	29212768	H0-Merged-chr13-29212660-1
chr17	42183342	42183652	H0-Merged-chr17-42183497-1
chr1	53433469	53433761	H0-Merged-chr1-53433615-1
chr2	161193295	161193740	H0-Merged-chr2-161193517-1
chr13	30093672	30094190	H0-Merged-chr13-30093931-1
chr2	224896535	224896720	H0-Merged-chr2-224896627-1
chr1	53589664	53590379	H0-Merged-chr1-53590021-1
chr2	225008455	225008800	H0-Merged-chr2-225008627-1
chr17	4674985	4675170	H0-Merged-chr17-4675077-1
chr3	193695636	193697164	H0-Merged-chr3-193696400-1
chr2	161331840	161332564	H0-Merged-chr2-161332202-1
chr3	193715579	193715914	H0-Merged-chr3-193715746-1
chr2	225301042	225301397	H0-Merged-chr2-225301219-1
chr2	161528050	161528609	H0-Merged-chr2-161528329-1
chr13	30253598	30253830	H0-Merged-chr13-30253714-1
chr13	30281238	30281714	H0-Merged-chr13-30281476-1
chr17	42451994	42452850	H0-Merged-chr17-42452422-1
chr1	54159461	54159773	H0-Merged-chr1-54159617-1
chr13	30722745	30723046	H0-Merged-chr13-30722895-1
chr1	54516054	54516820	H0-Merged-chr1-54516437-1
chr2	225863951	225864172	H0-Merged-chr2-225864061-1
chr2	225890981	225891385	H0-Merged-chr2-225891183-1
chr1	54611858	54612141	H0-Merged-chr1-54611999-1
chr2	162025194	162025380	H0-Merged-chr2-162025287-1
chr17	5124411	5124822	H0-Merged-chr17-5124616-1
chr17	5325915	5326473	H0-Merged-chr17-5326194-1
chr1	54732906	54733319	H0-Merged-chr1-54733112-1
chr1	54745036	54745769	H0-Merged-chr1-54745402-1
chr17	5458839	5459309	H0-Merged-chr17-5459074-1
chr1	54925213	54925628	H0-Merged-chr1-54925420-1
chr1	6438511	6438736	H0-Merged-chr1-6438623-1
chr1	6949755	6950313	H0-Merged-chr1-6950034-1
chr1	7023026	7023589	H0-Merged-chr1-7023307-1
chr8	141320127	141320350	H0-Merged-chr8-141320238-1
chr8	141455010	141455195	H0-Merged-chr8-141455102-1
chr6	660223	660593	H0-Merged-chr6-660408-1
chr8	141637850	141638301	H0-Merged-chr8-141638075-1
chr6	1535185	1535756	H0-Merged-chr6-1535470-1
chr2	61661041	61661639	H0-Merged-chr2-61661340-1
chr8	141735599	141736368	H0-Merged-chr8-141735983-1
chr2	10289885	10290279	H0-Merged-chr2-10290082-1
chr6	35992600	35992815	H0-Merged-chr6-35992707-1
chr6	35998365	35999338	H0-Merged-chr6-35998851-1
chr9	80220248	80220433	H0-Merged-chr9-80220340-1
chr8	141805273	141806123	H0-Merged-chr8-141805698-1
chr8	141835246	141835863	H0-Merged-chr8-141835554-1
chr2	62020674	62020878	H0-Merged-chr2-62020776-1
chr2	10415617	10416361	H0-Merged-chr2-10415989-1
chr2	10452775	10454444	H0-Merged-chr2-10453609-1
chr3	105849851	105850159	H0-Merged-chr3-105850005-1
chr3	37220075	37221156	H0-Merged-chr3-37220615-1
chr6	1729504	1729703	H0-Merged-chr6-1729603-1
chr3	37326309	37326494	H0-Merged-chr3-37326401-1
chr6	1756930	1757116	H0-Merged-chr6-1757023-1
chr16	22380389	22380790	H0-Merged-chr16-22380589-1
chr2	62215780	62216068	H0-Merged-chr2-62215924-1
chr16	22443634	22443846	H0-Merged-chr16-22443740-1
chr2	62429241	62429532	H0-Merged-chr2-62429386-1
chr2	10496279	10496507	H0-Merged-chr2-10496393-1
chr2	10552254	10552692	H0-Merged-chr2-10552473-1
chr2	10572549	10572803	H0-Merged-chr2-10572676-1
chr6	36387077	36387333	H0-Merged-chr6-36387205-1
chr3	37906513	37907513	H0-Merged-chr3-37907013-1
chr6	1885963	1886217	H0-Merged-chr6-1886090-1
chr8	141987291	141987686	H0-Merged-chr8-141987488-1
chr16	22549405	22549644	H0-Merged-chr16-22549524-1
chr2	62521924	62522285	H0-Merged-chr2-62522104-1
chr2	62529946	62530131	H0-Merged-chr2-62530038-1
chr16	22681728	22682130	H0-Merged-chr16-22681929-1
chr15	80372995	80373238	H0-Merged-chr15-80373116-1
chr3	107232250	107233529	H0-Merged-chr3-107232889-1
chr15	80712053	80712283	H0-Merged-chr15-80712168-1
chr15	80727814	80728083	H0-Merged-chr15-80727948-1
chr10	43896180	43896379	H0-Merged-chr10-43896279-1
chr12	7143995	7144363	H0-Merged-chr12-7144179-1
chr6	2116892	2117524	H0-Merged-chr6-2117208-1
chr11	86204060	86204641	H0-Merged-chr11-86204350-1
chr15	80729213	80729590	H0-Merged-chr15-80729401-1
chr15	80903848	80904379	H0-Merged-chr15-80904113-1
chr10	44109304	44109589	H0-Merged-chr10-44109446-1
chr9	80619962	80620692	H0-Merged-chr9-80620327-1
chr9	80627183	80627398	H0-Merged-chr9-80627290-1
chr3	38069324	38070379	H0-Merged-chr3-38069851-1
chr12	7289942	7290388	H0-Merged-chr12-7290165-1
chr6	2200785	2201246	H0-Merged-chr6-2201015-1
chr12	7362142	7362650	H0-Merged-chr12-7362396-1
chr12	7528025	7528317	H0-Merged-chr12-7528171-1
chr8	142099575	142100062	H0-Merged-chr8-142099818-1
chr16	23166920	23167191	H0-Merged-chr16-23167055-1
chr2	63842389	63842690	H0-Merged-chr2-63842539-1
chr16	23431386	23432192	H0-Merged-chr16-23431789-1
chr15	81029284	81029474	H0-Merged-chr15-81029379-1
chr3	107737258	107737579	H0-Merged-chr3-107737418-1
chr3	107742836	107743383	H0-Merged-chr3-107743109-1
chr6	36692006	36692211	H0-Merged-chr6-36692108-1
chr6	36733739	36734575	H0-Merged-chr6-36734157-1
chr9	80745075	80745297	H0-Merged-chr9-80745186-1
chr2	64363774	64363977	H0-Merged-chr2-64363875-1
chr11	86321543	86322019	H0-Merged-chr11-86321781-1
chr11	86347021	86347591	H0-Merged-chr11-86347306-1
chr6	36753658	36754019	H0-Merged-chr6-36753838-1
chr2	11463870	11464302	H0-Merged-chr2-11464086-1
chr6	36785364	36785604	H0-Merged-chr6-36785484-1
chr10	44466087	44466277	H0-Merged-chr10-44466182-1
chr10	45087121	45087888	H0-Merged-chr10-45087504-1
chr3	38697146	38697343	H0-Merged-chr3-38697244-1
chr6	2728810	2729617	H0-Merged-chr6-2729213-1
chr6	2744551	2744736	H0-Merged-chr6-2744643-1
chr11	86394298	86394483	H0-Merged-chr11-86394390-1
chr11	86484783	86485015	H0-Merged-chr11-86484899-1
chr1	840703	840888	H0-Merged-chr1-840795-1
chr16	24528256	24528808	H0-Merged-chr16-24528532-1
chr2	64691067	64691406	H0-Merged-chr2-64691236-1
chr11	86523550	86523784	H0-Merged-chr11-86523667-1
chr3	111442214	111442636	H0-Merged-chr3-111442425-1
chr15	81630266	81630986	H0-Merged-chr15-81630626-1
chr10	45484265	45484691	H0-Merged-chr10-45484478-1
chr1	965155	965561	H0-Merged-chr1-965358-1
chr12	8821243	8821887	H0-Merged-chr12-8821565-1
chr3	39439845	39440030	H0-Merged-chr3-39439937-1
chr1	1045245	1045504	H0-Merged-chr1-1045374-1
chr3	39459143	39459373	H0-Merged-chr3-39459258-1
chr1	1194549	1194737	H0-Merged-chr1-1194643-1
chr11	86966193	86966715	H0-Merged-chr11-86966454-1
chr11	87116543	87117097	H0-Merged-chr11-87116820-1
chr15	82628544	82628780	H0-Merged-chr15-82628662-1
chr16	25047366	25047919	H0-Merged-chr16-25047642-1
chr15	82657140	82657566	H0-Merged-chr15-82657353-1
chr11	89219044	89219617	H0-Merged-chr11-89219330-1
chr10	47757901	47758318	H0-Merged-chr10-47758109-1
chr10	48266460	48266645	H0-Merged-chr10-48266552-1
chr1	1772147	1772531	H0-Merged-chr1-1772339-1
chr1	1803145	1803378	H0-Merged-chr1-1803261-1
chr5	17187514	17188270	H0-Merged-chr5-17187892-1
chr8	28681847	28682222	H0-Merged-chr8-28682034-1
chr5	19909027	19909533	H0-Merged-chr5-19909280-1
chr20	49172700	49173421	H0-Merged-chr20-49173060-1
chr5	21343593	21344331	H0-Merged-chr5-21343962-1
chr7	131544147	131544375	H0-Merged-chr7-131544261-1
chr22	23878499	23878684	H0-Merged-chr22-23878591-1
chr5	31021565	31022185	H0-Merged-chr5-31021875-1
chr8	29115893	29116256	H0-Merged-chr8-29116074-1
chr7	131632984	131633683	H0-Merged-chr7-131633333-1
chr7	131821196	131822135	H0-Merged-chr7-131821665-1
chr22	24014966	24015164	H0-Merged-chr22-24015065-1
chr20	49538452	49539377	H0-Merged-chr20-49538914-1
chr8	29200956	29201619	H0-Merged-chr8-29201287-1
chr20	49597520	49598021	H0-Merged-chr20-49597770-1
chr5	32093251	32093495	H0-Merged-chr5-32093373-1
chr7	132066683	132067210	H0-Merged-chr7-132066946-1
chr5	96965040	96965274	H0-Merged-chr5-96965157-1
chr22	24191666	24192114	H0-Merged-chr22-24191890-1
chr5	32149265	32150061	H0-Merged-chr5-32149663-1
chr14	101603488	101603808	H0-Merged-chr14-101603648-1
chr14	101626726	101626918	H0-Merged-chr14-101626822-1
chr7	132112607	132113769	H0-Merged-chr7-132113188-1
chr14	102095042	102095515	H0-Merged-chr14-102095278-1
chr19	8114959	8115308	H0-Merged-chr19-8115133-1
chr14	50985073	50985272	H0-Merged-chr14-50985172-1
chr18	20516069	20516274	H0-Merged-chr18-20516171-1
chr5	32281157	32281925	H0-Merged-chr5-32281541-1
chr7	132189720	132190076	H0-Merged-chr7-132189898-1
chr22	24449911	24450358	H0-Merged-chr22-24450134-1
chr18	20682274	20682759	H0-Merged-chr18-20682516-1
chr20	50042289	50042678	H0-Merged-chr20-50042483-1
chr5	32580829	32581311	H0-Merged-chr5-32581070-1
chr14	102493604	102493962	H0-Merged-chr14-102493783-1
chr5	99983261	99983464	H0-Merged-chr5-99983362-1
chr18	20781675	20782076	H0-Merged-chr18-20781875-1
chr8	29732229	29732580	H0-Merged-chr8-29732404-1
chr1	156929600	156930092	H0-Merged-chr1-156929846-1
chr8	29745609	29746071	H0-Merged-chr8-29745840-1
chr11	9791016	9791728	H0-Merged-chr11-9791372-1
chr19	8519767	8520021	H0-Merged-chr19-8519894-1
chr14	102746292	102746996	H0-Merged-chr14-102746644-1
chr22	24635767	24637041	H0-Merged-chr22-24636404-1
chr22	24675162	24675756	H0-Merged-chr22-24675459-1
chr14	51399659	51399947	H0-Merged-chr14-51399803-1
chr14	51712797	51713001	H0-Merged-chr14-51712899-1
chr8	29836293	29836754	H0-Merged-chr8-29836523-1
chr5	33268534	33269193	H0-Merged-chr5-33268863-1
chr8	29873453	29873657	H0-Merged-chr8-29873555-1
chr22	24678769	24679010	H0-Merged-chr22-24678889-1
chr22	24693739	24694694	H0-Merged-chr22-24694216-1
chr18	20936676	20937064	H0-Merged-chr18-20936870-1
chr18	20941363	20941548	H0-Merged-chr18-20941455-1
chr20	50287833	50288627	H0-Merged-chr20-50288230-1
chr1	157152208	157152791	H0-Merged-chr1-157152499-1
chr20	50352677	50352862	H0-Merged-chr20-50352769-1
chr11	10227112	10227655	H0-Merged-chr11-10227383-1
chr11	10282731	10283088	H0-Merged-chr11-10282909-1
chr11	10312832	10313195	H0-Merged-chr11-10313013-1
chr1	212180609	212181389	H0-Merged-chr1-212180999-1
chr1	158013866	158014077	H0-Merged-chr1-158013971-1
chr14	103124569	103124785	H0-Merged-chr14-103124677-1
chr14	103166619	103166804	H0-Merged-chr14-103166711-1
chr11	10412129	10412684	H0-Merged-chr11-10412406-1
chr14	103249458	103249643	H0-Merged-chr14-103249550-1
chr1	212291920	212292105	H0-Merged-chr1-212292012-1
chr1	212327665	212327850	H0-Merged-chr1-212327757-1
chr10	97037935	97038237	H0-Merged-chr10-97038086-1
chr14	103571567	103571809	H0-Merged-chr14-103571688-1
chr14	103693686	103693928	H0-Merged-chr14-103693807-1
chr10	97451034	97451233	H0-Merged-chr10-97451133-1
chr1	159376044	159376780	H0-Merged-chr1-159376412-1
chr11	10813951	10814644	H0-Merged-chr11-10814297-1
chr11	10815955	10816472	H0-Merged-chr11-10816213-1
chr1	212803722	212804491	H0-Merged-chr1-212804106-1
chr10	97588629	97589137	H0-Merged-chr10-97588883-1
chr1	159753254	159753757	H0-Merged-chr1-159753505-1
chr11	10924548	10925270	H0-Merged-chr11-10924909-1
chr10	97807036	97807405	H0-Merged-chr10-97807220-1
chrX	16854356	16854608	H0-Merged-chrX-16854482-1
chr7	35073260	35073681	H0-Merged-chr7-35073470-1
chr7	35082157	35082379	H0-Merged-chr7-35082268-1
chr4	77483262	77483475	H0-Merged-chr4-77483368-1
chr7	35536143	35536421	H0-Merged-chr7-35536282-1
chr3	193896675	193897240	H0-Merged-chr3-193896957-1
chrX	19887387	19887751	H0-Merged-chrX-19887569-1
chrX	19888501	19888712	H0-Merged-chrX-19888606-1
chr7	35843990	35844519	H0-Merged-chr7-35844254-1
chr6	152106777	152107190	H0-Merged-chr6-152106983-1
chrX	20270845	20271065	H0-Merged-chrX-20270955-1
chr7	36298077	36298508	H0-Merged-chr7-36298292-1
chr2	162885992	162886871	H0-Merged-chr2-162886431-1
chr6	152527288	152527784	H0-Merged-chr6-152527536-1
chr7	36336563	36337418	H0-Merged-chr7-36336990-1
chr2	164478271	164478810	H0-Merged-chr2-164478540-1
chr3	194275419	194275604	H0-Merged-chr3-194275511-1
chr6	152659567	152659790	H0-Merged-chr6-152659678-1
chr17	43150568	43151339	H0-Merged-chr17-43150953-1
chr17	43153135	43153918	H0-Merged-chr17-43153526-1
chr2	228722463	228722803	H0-Merged-chr2-228722633-1
chr4	77991203	77991983	H0-Merged-chr4-77991593-1
chr2	228731426	228731965	H0-Merged-chr2-228731695-1
chr4	77999596	78000495	H0-Merged-chr4-78000045-1
chr4	78058699	78058884	H0-Merged-chr4-78058791-1
chr7	37140490	37140869	H0-Merged-chr7-37140679-1
chr6	153294699	153294984	H0-Merged-chr6-153294841-1
chr7	37375558	37376165	H0-Merged-chr7-37375861-1
chrX	24074911	24075425	H0-Merged-chrX-24075168-1
chrX	24185107	24185315	H0-Merged-chrX-24185211-1
chrX	24200994	24201525	H0-Merged-chrX-24201259-1
chrX	24212450	24212657	H0-Merged-chrX-24212553-1
chrX	24372707	24373450	H0-Merged-chrX-24373078-1
chrX	24389268	24389579	H0-Merged-chrX-24389423-1
chr17	43324099	43324519	H0-Merged-chr17-43324309-1
chr17	43325301	43325761	H0-Merged-chr17-43325531-1
chr2	165811655	165812289	H0-Merged-chr2-165811972-1
chr6	154735898	154736190	H0-Merged-chr6-154736044-1
chr6	154773088	154773273	H0-Merged-chr6-154773180-1
chr12	96709792	96709985	H0-Merged-chr12-96709888-1
chr17	43382929	43383315	H0-Merged-chr17-43383122-1
chr12	96729982	96730232	H0-Merged-chr12-96730107-1
chr12	96734717	96734918	H0-Merged-chr12-96734817-1
chr2	231174899	231175387	H0-Merged-chr2-231175143-1
chr17	6164971	6165474	H0-Merged-chr17-6165222-1
chr2	166963087	166963333	H0-Merged-chr2-166963210-1
chr6	154775627	154775824	H0-Merged-chr6-154775725-1
chr6	154810509	154811146	H0-Merged-chr6-154810827-1
chr4	79585142	79585814	H0-Merged-chr4-79585478-1
chr4	79592560	79592748	H0-Merged-chr4-79592654-1
chr17	6358379	6358564	H0-Merged-chr17-6358471-1
chr17	6376365	6376844	H0-Merged-chr17-6376604-1
chr2	168862229	168862690	H0-Merged-chr2-168862459-1
chr3	194763563	194763796	H0-Merged-chr3-194763679-1
chr2	231442066	231442503	H0-Merged-chr2-231442284-1
chr4	79811422	79811662	H0-Merged-chr4-79811542-1
chr2	169006130	169006735	H0-Merged-chr2-169006432-1
chr2	169045197	169045492	H0-Merged-chr2-169045344-1
chr2	169097455	169097930	H0-Merged-chr2-169097692-1
chr17	44063005	44063224	H0-Merged-chr17-44063114-1
chr2	231604204	231604417	H0-Merged-chr2-231604310-1
chr17	6690129	6690578	H0-Merged-chr17-6690353-1
chr17	44157083	44157330	H0-Merged-chr17-44157206-1
chr1	56879314	56879854	H0-Merged-chr1-56879584-1
chr17	44248174	44248675	H0-Merged-chr17-44248424-1
chr1	23290677	23291154	H0-Merged-chr1-23290915-1
chr1	23352442	23352991	H0-Merged-chr1-23352716-1
chr1	23361923	23362763	H0-Merged-chr1-23362343-1
chr17	44365030	44365227	H0-Merged-chr17-44365128-1
chr17	7199953	7200139	H0-Merged-chr17-7200046-1
chr1	23486208	23486393	H0-Merged-chr1-23486300-1
chr1	8296162	8296625	H0-Merged-chr1-8296393-1
chr1	8408896	8409084	H0-Merged-chr1-8408990-1
chr1	8583799	8583996	H0-Merged-chr1-8583897-1
chr1	8587749	8588008	H0-Merged-chr1-8587878-1
chr8	142385981	142386209	H0-Merged-chr8-142386095-1
chr9	82180179	82180421	H0-Merged-chr9-82180300-1
chr9	82326503	82326950	H0-Merged-chr9-82326726-1
chr6	2919312	2919886	H0-Merged-chr6-2919599-1
chr6	2969075	2969277	H0-Merged-chr6-2969176-1
chr8	143811246	143812011	H0-Merged-chr8-143811628-1
chr8	143835941	143836150	H0-Merged-chr8-143836045-1
chr8	144074063	144074798	H0-Merged-chr8-144074430-1
chr6	37051259	37051450	H0-Merged-chr6-37051354-1
chr9	84025088	84025388	H0-Merged-chr9-84025238-1
chr9	84149167	84149672	H0-Merged-chr9-84149419-1
chr9	84188742	84189021	H0-Merged-chr9-84188881-1
chr6	3010685	3011019	H0-Merged-chr6-3010852-1
chr8	144235443	144235657	H0-Merged-chr8-144235550-1
chr6	37179826	37180108	H0-Merged-chr6-37179967-1
[truncated: 26,152 more rows]

## Sheet: RE
chr	start	end	peak
chr7	134263081	134263782	H12-Merged-chr7-134263431-1
chr7	134270710	134270912	H12-Merged-chr7-134270811-1
chr7	134661251	134661591	H12-Merged-chr7-134661421-1
chr7	134762036	134762651	H12-Merged-chr7-134762343-1
chr6	137824859	137826070	H12-Merged-chr6-137825464-1
chr6	137895797	137896236	H12-Merged-chr6-137896016-1
chr6	137961346	137961820	H12-Merged-chr6-137961583-1
chr6	138468561	138469097	H12-Merged-chr6-138468829-1
chr7	134950396	134950562	H12-Merged-chr7-134950479-1
chr7	134951256	134951965	H12-Merged-chr7-134951610-1
chr7	137147772	137148420	H12-Merged-chr7-137148096-1
chr7	137349810	137350402	H12-Merged-chr7-137350106-1
chr7	137451471	137451939	H12-Merged-chr7-137451705-1
chr6	143047896	143048091	H12-Merged-chr6-143047993-1
chr6	143358118	143358300	H12-Merged-chr6-143358209-1
chr2	91789904	91790072	H12-Merged-chr2-91789988-1
chr2	91791062	91791229	H12-Merged-chr2-91791145-1
chr7	138808276	138808483	H12-Merged-chr7-138808379-1
chr7	138895160	138895819	H12-Merged-chr7-138895489-1
chr7	139176625	139177044	H12-Merged-chr7-139176834-1
chr7	139179749	139181192	H12-Merged-chr7-139180470-1
chr19	14278036	14278503	H12-Merged-chr19-14278269-1
chr19	14332517	14332866	H12-Merged-chr19-14332691-1
chr6	143852999	143853170	H12-Merged-chr6-143853084-1
chr19	14348269	14349040	H12-Merged-chr19-14348654-1
chr19	14363979	14365037	H12-Merged-chr19-14364508-1
chr6	144239255	144239433	H12-Merged-chr6-144239344-1
chr6	144255945	144256562	H12-Merged-chr6-144256253-1
chr6	144258264	144258516	H12-Merged-chr6-144258390-1
chr6	144280334	144280515	H12-Merged-chr6-144280424-1
chr2	91858250	91858864	H12-Merged-chr2-91858557-1
chr2	91867562	91869037	H12-Merged-chr2-91868299-1
chr2	91869804	91870703	H12-Merged-chr2-91870253-1
chr7	139225163	139225918	H12-Merged-chr7-139225540-1
chr7	139502197	139503442	H12-Merged-chr7-139502819-1
chr7	139516254	139517224	H12-Merged-chr7-139516739-1
chr7	139564566	139565011	H12-Merged-chr7-139564788-1
chr7	139594613	139595062	H12-Merged-chr7-139594837-1
chr7	139645101	139645655	H12-Merged-chr7-139645378-1
chr19	14379511	14379827	H12-Merged-chr19-14379669-1
chr19	14386474	14386805	H12-Merged-chr19-14386639-1
chr19	14483832	14484218	H12-Merged-chr19-14484025-1
chr6	144343123	144343844	H12-Merged-chr6-144343483-1
chr6	144345102	144345312	H12-Merged-chr6-144345207-1
chr19	15239937	15240235	H12-Merged-chr19-15240086-1
chr6	144355273	144355492	H12-Merged-chr6-144355382-1
chr19	15241011	15241223	H12-Merged-chr19-15241117-1
chr6	144366398	144366798	H12-Merged-chr6-144366598-1
chr6	144369689	144369879	H12-Merged-chr6-144369784-1
chr6	144371376	144371971	H12-Merged-chr6-144371673-1
chr6	144381196	144381481	H12-Merged-chr6-144381338-1
chr2	91977175	91977468	H12-Merged-chr2-91977321-1
chr7	139905181	139906151	H12-Merged-chr7-139905666-1
chr7	139920456	139921491	H12-Merged-chr7-139920973-1
chr19	15636063	15636229	H12-Merged-chr19-15636146-1
chr19	15663421	15663624	H12-Merged-chr19-15663522-1
chr6	146755810	146756513	H12-Merged-chr6-146756161-1
chr6	146850095	146850412	H12-Merged-chr6-146850253-1
chr2	95383479	95383681	H12-Merged-chr2-95383580-1
chr7	139973420	139974015	H12-Merged-chr7-139973717-1
chr2	95696382	95697016	H12-Merged-chr2-95696699-1
chr7	140007829	140008073	H12-Merged-chr7-140007951-1
chr2	96006643	96006987	H12-Merged-chr2-96006815-1
chr2	96008266	96009338	H12-Merged-chr2-96008802-1
chr7	140360593	140360807	H12-Merged-chr7-140360700-1
chr7	140628121	140628356	H12-Merged-chr7-140628238-1
chr19	16891448	16892306	H12-Merged-chr19-16891877-1
chr19	16902524	16902951	H12-Merged-chr19-16902737-1
chr19	17127521	17127864	H12-Merged-chr19-17127692-1
chr6	147050268	147050743	H12-Merged-chr6-147050505-1
chr19	17143797	17144034	H12-Merged-chr19-17143915-1
chr6	148910036	148910223	H12-Merged-chr6-148910129-1
chr6	148935048	148935492	H12-Merged-chr6-148935270-1
chr6	149272435	149272841	H12-Merged-chr6-149272638-1
chr6	149284214	149284550	H12-Merged-chr6-149284382-1
chr2	96125468	96125679	H12-Merged-chr2-96125573-1
chr2	96176842	96177592	H12-Merged-chr2-96177217-1
chr7	142103972	142104548	H12-Merged-chr7-142104260-1
chr7	142108232	142108502	H12-Merged-chr7-142108367-1
chr2	96227782	96228269	H12-Merged-chr2-96228025-1
chr2	96259937	96260257	H12-Merged-chr2-96260097-1
chr7	142118131	142118474	H12-Merged-chr7-142118302-1
chr7	142140106	142140885	H12-Merged-chr7-142140495-1
chr19	17639199	17639748	H12-Merged-chr19-17639473-1
chr6	149358221	149358718	H12-Merged-chr6-149358469-1
chr19	17740010	17740324	H12-Merged-chr19-17740167-1
chr6	149360616	149361045	H12-Merged-chr6-149360830-1
chr19	17804930	17805950	H12-Merged-chr19-17805440-1
chr6	149452702	149454338	H12-Merged-chr6-149453520-1
chr6	149461348	149461670	H12-Merged-chr6-149461509-1
chr2	96337405	96337612	H12-Merged-chr2-96337508-1
chr2	96348969	96349283	H12-Merged-chr2-96349126-1
chr2	96378790	96378965	H12-Merged-chr2-96378877-1
chr2	96398157	96398374	H12-Merged-chr2-96398265-1
chr7	142200327	142200493	H12-Merged-chr7-142200410-1
chr7	142204100	142204408	H12-Merged-chr7-142204254-1
chr7	142274545	142274711	H12-Merged-chr7-142274628-1
chr19	17942329	17942788	H12-Merged-chr19-17942558-1
chr6	149549667	149550352	H12-Merged-chr6-149550009-1
chr19	18075407	18076055	H12-Merged-chr19-18075731-1
chr6	149563072	149563293	H12-Merged-chr6-149563182-1
chr6	149587467	149587867	H12-Merged-chr6-149587667-1
chr19	18154267	18154869	H12-Merged-chr19-18154568-1
chr6	149744887	149745513	H12-Merged-chr6-149745200-1
chr6	149765325	149765719	H12-Merged-chr6-149765522-1
chr2	96452309	96452571	H12-Merged-chr2-96452440-1
chr2	96453584	96453789	H12-Merged-chr2-96453686-1
chr2	96455494	96455661	H12-Merged-chr2-96455577-1
chr2	96460915	96461455	H12-Merged-chr2-96461185-1
chr2	96659634	96660125	H12-Merged-chr2-96659879-1
chr7	142394497	142395016	H12-Merged-chr7-142394756-1
chr7	142425406	142426115	H12-Merged-chr7-142425760-1
chr7	142428395	142429215	H12-Merged-chr7-142428805-1
chr7	142436660	142436904	H12-Merged-chr7-142436782-1
chr19	18320819	18321296	H12-Merged-chr19-18321057-1
chr19	18331137	18331639	H12-Merged-chr19-18331388-1
chr6	149788195	149789976	H12-Merged-chr6-149789085-1
chr19	18332491	18333029	H12-Merged-chr19-18332760-1
chr6	149806666	149806933	H12-Merged-chr6-149806799-1
chr6	149871823	149873257	H12-Merged-chr6-149872540-1
chr6	149874427	149875106	H12-Merged-chr6-149874766-1
chr6	149875978	149876237	H12-Merged-chr6-149876107-1
chr2	96673862	96674028	H12-Merged-chr2-96673945-1
chr2	96701462	96702144	H12-Merged-chr2-96701803-1
chr2	96713462	96714117	H12-Merged-chr2-96713789-1
chr7	142485988	142486279	H12-Merged-chr7-142486133-1
chr7	142576229	142576538	H12-Merged-chr7-142576383-1
chr7	142577508	142577674	H12-Merged-chr7-142577591-1
chr7	142607929	142608179	H12-Merged-chr7-142608054-1
chr19	18890496	18891099	H12-Merged-chr19-18890797-1
chr19	18908078	18908791	H12-Merged-chr19-18908434-1
chr6	150229685	150229851	H12-Merged-chr6-150229768-1
chr19	18911489	18912008	H12-Merged-chr19-18911748-1
chr6	150241356	150241805	H12-Merged-chr6-150241580-1
chr19	18922996	18924247	H12-Merged-chr19-18923621-1
chr2	96736147	96737098	H12-Merged-chr2-96736622-1
chr2	96739896	96740228	H12-Merged-chr2-96740062-1
chr2	96757619	96759601	H12-Merged-chr2-96758610-1
chr2	96778212	96778824	H12-Merged-chr2-96778518-1
chr2	96797385	96797758	H12-Merged-chr2-96797571-1
chr2	96800977	96801798	H12-Merged-chr2-96801387-1
chr19	19072871	19073178	H12-Merged-chr19-19073024-1
chr2	96824393	96824617	H12-Merged-chr2-96824505-1
chr2	97045346	97045512	H12-Merged-chr2-97045429-1
chr2	97065958	97066494	H12-Merged-chr2-97066226-1
chr19	23253536	23254324	H12-Merged-chr19-23253930-1
chr19	30211116	30211282	H12-Merged-chr19-30211199-1
chr19	30363489	30364138	H12-Merged-chr19-30363813-1
chr10	99100755	99101190	H12-Merged-chr10-99100972-1
chr10	99461903	99463394	H12-Merged-chr10-99462648-1
chr10	99540979	99541229	H12-Merged-chr10-99541104-1
chr10	99554618	99554854	H12-Merged-chr10-99554736-1
chr1	221088853	221089190	H12-Merged-chr1-221089021-1
chr1	221479321	221479504	H12-Merged-chr1-221479412-1
chr1	221488894	221489349	H12-Merged-chr1-221489121-1
chr1	221543369	221543763	H12-Merged-chr1-221543566-1
chr1	221839653	221839902	H12-Merged-chr1-221839777-1
chr1	221847147	221848182	H12-Merged-chr1-221847664-1
chr1	221851669	221852055	H12-Merged-chr1-221851862-1
chr1	221955555	221956175	H12-Merged-chr1-221955865-1
chr10	99577867	99578615	H12-Merged-chr10-99578241-1
chr10	99605096	99605879	H12-Merged-chr10-99605487-1
chr10	99670623	99670994	H12-Merged-chr10-99670808-1
chr10	99691504	99691757	H12-Merged-chr10-99691630-1
chr1	222704705	222704896	H12-Merged-chr1-222704800-1
chr1	223312707	223313887	H12-Merged-chr1-223313297-1
chr1	223429551	223429717	H12-Merged-chr1-223429634-1
chr1	223438929	223439407	H12-Merged-chr1-223439168-1
chr1	223517688	223517967	H12-Merged-chr1-223517827-1
chr1	223534737	223534952	H12-Merged-chr1-223534844-1
chr1	223539458	223539745	H12-Merged-chr1-223539601-1
chr10	99784940	99785517	H12-Merged-chr10-99785228-1
chr10	99865315	99865551	H12-Merged-chr10-99865433-1
chr10	100034797	100035116	H12-Merged-chr10-100034956-1
chr10	100036193	100036407	H12-Merged-chr10-100036300-1
chr10	100041756	100042337	H12-Merged-chr10-100042046-1
chr1	223695755	223696425	H12-Merged-chr1-223696090-1
chr1	223700118	223700462	H12-Merged-chr1-223700290-1
chr1	223824896	223825463	H12-Merged-chr1-223825179-1
chr10	100050765	100051039	H12-Merged-chr10-100050902-1
chr10	100051776	100052017	H12-Merged-chr10-100051896-1
chr10	100058351	100058759	H12-Merged-chr10-100058555-1
chr10	100062845	100063585	H12-Merged-chr10-100063215-1
chr1	224868863	224869732	H12-Merged-chr1-224869297-1
chr1	224905632	224905978	H12-Merged-chr1-224905805-1
chr1	224924346	224924770	H12-Merged-chr1-224924558-1
chr1	224935767	224935953	H12-Merged-chr1-224935860-1
chr1	225621591	225622474	H12-Merged-chr1-225622032-1
chr1	226133970	226134429	H12-Merged-chr1-226134199-1
chr1	226140458	226140639	H12-Merged-chr1-226140548-1
chr1	226143514	226144651	H12-Merged-chr1-226144082-1
chr10	100064892	100065723	H12-Merged-chr10-100065307-1
chr10	100066560	100067393	H12-Merged-chr10-100066976-1
chr10	100068597	100069130	H12-Merged-chr10-100068863-1
chr10	100100297	100101025	H12-Merged-chr10-100100661-1
chr10	100108364	100109339	H12-Merged-chr10-100108851-1
chr10	100114000	100114397	H12-Merged-chr10-100114198-1
chr10	100116470	100117100	H12-Merged-chr10-100116785-1
chr1	226149621	226150230	H12-Merged-chr1-226149925-1
chr1	226397126	226397516	H12-Merged-chr1-226397321-1
chr1	226398396	226399010	H12-Merged-chr1-226398703-1
chr1	226504278	226504525	H12-Merged-chr1-226504401-1
chr1	226605178	226605976	H12-Merged-chr1-226605577-1
chr1	226638734	226639111	H12-Merged-chr1-226638922-1
chr1	226663871	226664345	H12-Merged-chr1-226664108-1
chr10	100988678	100988844	H12-Merged-chr10-100988761-1
chr10	101100731	101101050	H12-Merged-chr10-101100890-1
chr10	101126847	101127014	H12-Merged-chr10-101126930-1
chr1	226667407	226668406	H12-Merged-chr1-226667906-1
chr1	226692264	226692430	H12-Merged-chr1-226692347-1
chr1	226698011	226698439	H12-Merged-chr1-226698225-1
chr1	226700099	226700301	H12-Merged-chr1-226700200-1
chr1	226709674	226710300	H12-Merged-chr1-226709987-1
chr10	101217653	101218231	H12-Merged-chr10-101217942-1
chr10	101269112	101269906	H12-Merged-chr10-101269509-1
chr1	226731240	226732038	H12-Merged-chr1-226731639-1
chr1	226746079	226746349	H12-Merged-chr1-226746214-1
chr1	226773976	226774664	H12-Merged-chr1-226774320-1
chr1	226785477	226785883	H12-Merged-chr1-226785680-1
chr10	101322875	101323437	H12-Merged-chr10-101323156-1
chr1	226792849	226793549	H12-Merged-chr1-226793199-1
chr1	226798501	226800055	H12-Merged-chr1-226799278-1
chr1	227021712	227022555	H12-Merged-chr1-227022133-1
chr1	227050468	227050651	H12-Merged-chr1-227050559-1
chr1	227640956	227641251	H12-Merged-chr1-227641103-1
chr1	227641934	227642355	H12-Merged-chr1-227642144-1
chr1	227643967	227644133	H12-Merged-chr1-227644050-1
chr10	101816426	101816911	H12-Merged-chr10-101816668-1
chr10	101846280	101846643	H12-Merged-chr10-101846461-1
chr10	101847723	101848156	H12-Merged-chr10-101847939-1
chr1	227646405	227647046	H12-Merged-chr1-227646725-1
chr1	227651685	227652145	H12-Merged-chr1-227651915-1
chr1	227709668	227710279	H12-Merged-chr1-227709973-1
chr1	227997838	227998004	H12-Merged-chr1-227997921-1
chr10	101889187	101890461	H12-Merged-chr10-101889824-1
chr10	101892595	101892773	H12-Merged-chr10-101892684-1
chr10	102064485	102065540	H12-Merged-chr10-102065012-1
chr10	102071836	102072025	H12-Merged-chr10-102071930-1
chr1	228144736	228145422	H12-Merged-chr1-228145079-1
chr1	228222746	228223087	H12-Merged-chr1-228222916-1
chr1	228254524	228255892	H12-Merged-chr1-228255208-1
chr5	89831652	89831950	H12-Merged-chr5-89831801-1
chr5	89843026	89843365	H12-Merged-chr5-89843195-1
chr5	89867080	89867599	H12-Merged-chr5-89867339-1
chr5	91828570	91828757	H12-Merged-chr5-91828663-1
chr5	94603497	94603663	H12-Merged-chr5-94603580-1
chr4	38773385	38773578	H12-Merged-chr4-38773481-1
chr4	38955467	38956157	H12-Merged-chr4-38955812-1
chr4	39176106	39176272	H12-Merged-chr4-39176189-1
chr4	39441181	39441573	H12-Merged-chr4-39441377-1
chr4	40357439	40358226	H12-Merged-chr4-40357832-1
chr4	40575514	40575680	H12-Merged-chr4-40575597-1
chr5	94623154	94623751	H12-Merged-chr5-94623452-1
chr5	94626484	94627093	H12-Merged-chr5-94626788-1
chr5	94686487	94686748	H12-Merged-chr5-94686617-1
chr4	40640199	40640846	H12-Merged-chr4-40640522-1
chr4	40778742	40779590	H12-Merged-chr4-40779166-1
chr4	40784503	40784819	H12-Merged-chr4-40784661-1
chr17	11903480	11903905	H12-Merged-chr17-11903692-1
chr5	94689376	94689812	H12-Merged-chr5-94689594-1
chr5	94692845	94693312	H12-Merged-chr5-94693078-1
chr17	11916071	11916474	H12-Merged-chr17-11916272-1
chr5	94709339	94710104	H12-Merged-chr5-94709721-1
chr5	94763625	94763791	H12-Merged-chr5-94763708-1
chr15	68225089	68225354	H12-Merged-chr15-68225221-1
chr15	68273597	68273811	H12-Merged-chr15-68273704-1
chr15	68300391	68300911	H12-Merged-chr15-68300651-1
chr15	68323619	68323924	H12-Merged-chr15-68323771-1
chr4	41248032	41248505	H12-Merged-chr4-41248268-1
chr15	68328874	68329210	H12-Merged-chr15-68329042-1
chr15	68526835	68527663	H12-Merged-chr15-68527249-1
chr4	41290258	41290454	H12-Merged-chr4-41290356-1
chr17	15215509	15215728	H12-Merged-chr17-15215618-1
chr5	102579573	102579909	H12-Merged-chr5-102579741-1
chr5	108821180	108822003	H12-Merged-chr5-108821591-1
chr17	15249567	15249746	H12-Merged-chr17-15249656-1
chr17	15258329	15258854	H12-Merged-chr17-15258591-1
chr5	111783501	111783667	H12-Merged-chr5-111783584-1
chr5	111832752	111832918	H12-Merged-chr5-111832835-1
chr5	111839195	111839963	H12-Merged-chr5-111839579-1
chr15	68621504	68622262	H12-Merged-chr15-68621883-1
chr15	68700105	68700992	H12-Merged-chr15-68700548-1
chr4	41371377	41371784	H12-Merged-chr4-41371580-1
chr15	68728013	68729417	H12-Merged-chr15-68728715-1
chr4	41374064	41374263	H12-Merged-chr4-41374163-1
chr4	41375118	41375401	H12-Merged-chr4-41375259-1
chr15	68733454	68733958	H12-Merged-chr15-68733706-1
chr4	41398047	41399306	H12-Merged-chr4-41398676-1
chr4	41412685	41413487	H12-Merged-chr4-41413086-1
chr17	15270743	15272417	H12-Merged-chr17-15271580-1
chr17	15278089	15278680	H12-Merged-chr17-15278384-1
chr17	15291687	15292997	H12-Merged-chr17-15292342-1
chr5	111963962	111964175	H12-Merged-chr5-111964068-1
chr5	112022505	112023291	H12-Merged-chr5-112022898-1
chr17	16294779	16295035	H12-Merged-chr17-16294907-1
chr5	112189866	112190143	H12-Merged-chr5-112190004-1
chr17	16393988	16394735	H12-Merged-chr17-16394361-1
chr5	112744483	112745138	H12-Merged-chr5-112744810-1
chr5	112843436	112844117	H12-Merged-chr5-112843776-1
chr5	112845743	112846057	H12-Merged-chr5-112845900-1
chr15	68753707	68753948	H12-Merged-chr15-68753827-1
chr15	68760601	68761941	H12-Merged-chr15-68761271-1
chr15	68771554	68772059	H12-Merged-chr15-68771806-1
chr4	41438197	41438729	H12-Merged-chr4-41438463-1
chr4	41498591	41498817	H12-Merged-chr4-41498704-1
chr15	68796871	68797310	H12-Merged-chr15-68797090-1
chr4	41515319	41515722	H12-Merged-chr4-41515520-1
chr15	68798254	68798537	H12-Merged-chr15-68798395-1
chr4	41548253	41548419	H12-Merged-chr4-41548336-1
chr17	16414279	16414460	H12-Merged-chr17-16414369-1
chr5	113074590	113075184	H12-Merged-chr5-113074887-1
chr17	16567284	16567542	H12-Merged-chr17-16567413-1
chr5	113634939	113635645	H12-Merged-chr5-113635292-1
chr5	113681501	113681691	H12-Merged-chr5-113681596-1
chr15	68813047	68813274	H12-Merged-chr15-68813160-1
chr15	68814164	68814489	H12-Merged-chr15-68814326-1
chr15	68840255	68840850	H12-Merged-chr15-68840552-1
chr15	68851032	68851462	H12-Merged-chr15-68851247-1
chr15	68858209	68858385	H12-Merged-chr15-68858297-1
chr4	41573648	41573862	H12-Merged-chr4-41573755-1
chr4	41611009	41611549	H12-Merged-chr4-41611279-1
chr17	16686882	16687181	H12-Merged-chr17-16687031-1
chr17	16705744	16706725	H12-Merged-chr17-16706234-1
chr17	16708170	16708342	H12-Merged-chr17-16708256-1
chr17	16722935	16723394	H12-Merged-chr17-16723164-1
chr17	16728880	16729949	H12-Merged-chr17-16729414-1
chr5	115070324	115070949	H12-Merged-chr5-115070636-1
chr17	16757198	16757718	H12-Merged-chr17-16757458-1
chr17	16781532	16782286	H12-Merged-chr17-16781909-1
chr5	115300615	115300964	H12-Merged-chr5-115300789-1
chr5	115905370	115906212	H12-Merged-chr5-115905791-1
chr4	41666104	41666427	H12-Merged-chr4-41666265-1
chr4	41670778	41671607	H12-Merged-chr4-41671192-1
chr17	16859045	16859652	H12-Merged-chr17-16859348-1
chr5	118740590	118741485	H12-Merged-chr5-118741037-1
chr5	118743044	118743225	H12-Merged-chr5-118743134-1
chr5	118744075	118744244	H12-Merged-chr5-118744159-1
chr17	16877939	16878791	H12-Merged-chr17-16878365-1
chr5	118758278	118758796	H12-Merged-chr5-118758537-1
chr17	16892558	16893140	H12-Merged-chr17-16892849-1
chr5	120037976	120038144	H12-Merged-chr5-120038060-1
chr5	121533769	121533946	H12-Merged-chr5-121533857-1
chr15	69143041	69143674	H12-Merged-chr15-69143357-1
chr15	69155502	69156308	H12-Merged-chr15-69155905-1
chr4	41683223	41683532	H12-Merged-chr4-41683377-1
chr15	69165621	69166524	H12-Merged-chr15-69166072-1
chr4	41764417	41764583	H12-Merged-chr4-41764500-1
chr15	69167647	69167922	H12-Merged-chr15-69167784-1
chr4	41769310	41769663	H12-Merged-chr4-41769486-1
chr4	41774542	41775589	H12-Merged-chr4-41775065-1
chr4	41798628	41798857	H12-Merged-chr4-41798742-1
chr4	41811355	41811574	H12-Merged-chr4-41811464-1
chr17	17280177	17280682	H12-Merged-chr17-17280429-1
chr17	17355938	17356714	H12-Merged-chr17-17356326-1
chr5	122384532	122384698	H12-Merged-chr5-122384615-1
chr5	122414362	122414548	H12-Merged-chr5-122414455-1
chr17	17375793	17376543	H12-Merged-chr17-17376168-1
chr17	17377304	17377480	H12-Merged-chr17-17377392-1
chr15	69172466	69173688	H12-Merged-chr15-69173077-1
chr15	69197374	69198192	H12-Merged-chr15-69197783-1
chr15	69200249	69201004	H12-Merged-chr15-69200626-1
chr4	41860988	41861383	H12-Merged-chr4-41861185-1
chr15	69279442	69279847	H12-Merged-chr15-69279644-1
chr15	69307125	69307550	H12-Merged-chr15-69307337-1
chr4	41925636	41925802	H12-Merged-chr4-41925719-1
chr4	41930033	41930376	H12-Merged-chr4-41930204-1
chr17	17575941	17577032	H12-Merged-chr17-17576486-1
chr17	17975630	17976250	H12-Merged-chr17-17975940-1
chr17	17981935	17982760	H12-Merged-chr17-17982347-1
chr5	122486873	122487180	H12-Merged-chr5-122487026-1
chr5	122506573	122506858	H12-Merged-chr5-122506715-1
chr17	18339006	18339505	H12-Merged-chr17-18339255-1
chr17	18471569	18472234	H12-Merged-chr17-18471901-1
chr5	123211329	123211652	H12-Merged-chr5-123211490-1
chr5	123778055	123778800	H12-Merged-chr5-123778427-1
chr5	123798532	123799348	H12-Merged-chr5-123798940-1
chr15	69317583	69317969	H12-Merged-chr15-69317776-1
chr15	69623156	69623671	H12-Merged-chr15-69623413-1
chr15	69664638	69665460	H12-Merged-chr15-69665049-1
chr15	69781701	69782451	H12-Merged-chr15-69782076-1
chr15	69788450	69789068	H12-Merged-chr15-69788759-1
chr4	42648246	42648577	H12-Merged-chr4-42648411-1
chr15	69813728	69813896	H12-Merged-chr15-69813812-1
chr4	47656506	47657161	H12-Merged-chr4-47656833-1
chr17	18540460	18541208	H12-Merged-chr17-18540834-1
chr17	18550622	18550788	H12-Merged-chr17-18550705-1
chr17	18663754	18663972	H12-Merged-chr17-18663863-1
chr17	18748326	18748980	H12-Merged-chr17-18748653-1
chr17	18843598	18843764	H12-Merged-chr17-18843681-1
chr15	69823522	69824310	H12-Merged-chr15-69823916-1
chr15	69828449	69829130	H12-Merged-chr15-69828789-1
chr15	69875911	69876211	H12-Merged-chr15-69876061-1
chr15	69916223	69916417	H12-Merged-chr15-69916320-1
chr15	69941814	69941980	H12-Merged-chr15-69941897-1
chr15	69996771	69997402	H12-Merged-chr15-69997086-1
chr15	70011464	70012116	H12-Merged-chr15-70011790-1
chr17	18853194	18853546	H12-Merged-chr17-18853370-1
chr17	19297705	19298437	H12-Merged-chr17-19298071-1
chr17	19528408	19529208	H12-Merged-chr17-19528808-1
chr17	19542202	19543140	H12-Merged-chr17-19542671-1
chr17	19909000	19909622	H12-Merged-chr17-19909311-1
chr17	19998904	19999199	H12-Merged-chr17-19999051-1
chr15	70034782	70035729	H12-Merged-chr15-70035255-1
chr15	70084164	70085361	H12-Merged-chr15-70084762-1
chr15	70137534	70137710	H12-Merged-chr15-70137622-1
chr15	70408956	70409225	H12-Merged-chr15-70409090-1
chr15	70417443	70417641	H12-Merged-chr15-70417542-1
chr1	20539815	20540622	H12-Merged-chr1-20540218-1
chr1	20545812	20545978	H12-Merged-chr1-20545895-1
chr1	20553752	20553995	H12-Merged-chr1-20553873-1
chr1	20648335	20649246	H12-Merged-chr1-20648790-1
chr1	20668909	20669773	H12-Merged-chr1-20669341-1
chr1	20686445	20686647	H12-Merged-chr1-20686546-1
chr1	20688694	20688913	H12-Merged-chr1-20688803-1
chr1	20702856	20703366	H12-Merged-chr1-20703111-1
chr1	20706878	20707125	H12-Merged-chr1-20707001-1
chr1	20725123	20725895	H12-Merged-chr1-20725509-1
chr1	20775831	20776326	H12-Merged-chr1-20776078-1
chr1	20794474	20795229	H12-Merged-chr1-20794851-1
chr1	20852386	20853184	H12-Merged-chr1-20852785-1
chr1	20854799	20856354	H12-Merged-chr1-20855576-1
chr1	20861598	20861764	H12-Merged-chr1-20861681-1
chr1	20863116	20863739	H12-Merged-chr1-20863427-1
chr1	20891942	20892339	H12-Merged-chr1-20892140-1
chr1	21008078	21008694	H12-Merged-chr1-21008386-1
chr1	21044758	21045182	H12-Merged-chr1-21044970-1
chr1	21525011	21525502	H12-Merged-chr1-21525256-1
chr1	21762801	21763122	H12-Merged-chr1-21762961-1
chr1	21807304	21808517	H12-Merged-chr1-21807910-1
chr1	21858083	21858435	H12-Merged-chr1-21858259-1
chr20	39325669	39326286	H12-Merged-chr20-39325977-1
chr20	39327056	39327790	H12-Merged-chr20-39327423-1
chr20	39339389	39339834	H12-Merged-chr20-39339611-1
chr20	39368244	39368647	H12-Merged-chr20-39368445-1
chr20	39373263	39373689	H12-Merged-chr20-39373476-1
chr20	39454717	39455234	H12-Merged-chr20-39454975-1
chr20	40000025	40000481	H12-Merged-chr20-40000253-1
chr9	78824907	78825914	H12-Merged-chr9-78825410-1
chr9	78827391	78828436	H12-Merged-chr9-78827913-1
chr9	78836731	78837043	H12-Merged-chr9-78836887-1
chr9	78846740	78846967	H12-Merged-chr9-78846853-1
chr1	21866446	21867217	H12-Merged-chr1-21866831-1
chr1	21886848	21887568	H12-Merged-chr1-21887208-1
chr1	21897306	21897575	H12-Merged-chr1-21897440-1
chr1	21905621	21906327	H12-Merged-chr1-21905974-1
chr1	21907418	21907866	H12-Merged-chr1-21907642-1
chr1	21915261	21915638	H12-Merged-chr1-21915449-1
chr1	21919416	21919833	H12-Merged-chr1-21919624-1
chr20	40254100	40254266	H12-Merged-chr20-40254183-1
chr20	42067964	42068474	H12-Merged-chr20-42068219-1
chr20	42106069	42106356	H12-Merged-chr20-42106212-1
chr9	78945335	78945862	H12-Merged-chr9-78945598-1
chr9	78947715	78948126	H12-Merged-chr9-78947920-1
chr9	79321035	79321809	H12-Merged-chr9-79321422-1
chr9	79323010	79323604	H12-Merged-chr9-79323307-1
chr9	79343626	79344267	H12-Merged-chr9-79343946-1
chr9	79418724	79419158	H12-Merged-chr9-79418941-1
chr1	21939949	21940575	H12-Merged-chr1-21940262-1
chr1	21968025	21968487	H12-Merged-chr1-21968256-1
chr22	38215083	38216643	H12-Merged-chr22-38215863-1
chr20	42121629	42122170	H12-Merged-chr20-42121899-1
chr1	21988448	21988946	H12-Merged-chr1-21988697-1
chr20	42124089	42125715	H12-Merged-chr20-42124902-1
chr22	38444721	38445132	H12-Merged-chr22-38444926-1
chr22	38488805	38489150	H12-Merged-chr22-38488977-1
chr9	79661437	79662390	H12-Merged-chr9-79661913-1
chr9	80183722	80184256	H12-Merged-chr9-80183989-1
chr9	80716371	80716553	H12-Merged-chr9-80716462-1
chr9	80985929	80986119	H12-Merged-chr9-80986024-1
chr1	21997938	21998343	H12-Merged-chr1-21998140-1
chr22	38829875	38830167	H12-Merged-chr22-38830021-1
chr22	38840922	38841251	H12-Merged-chr22-38841086-1
chr1	22491781	22492264	H12-Merged-chr1-22492022-1
chr20	42769125	42769354	H12-Merged-chr20-42769239-1
chr22	39208247	39208512	H12-Merged-chr22-39208379-1
chr22	39211195	39211537	H12-Merged-chr22-39211366-1
chr20	43018706	43019193	H12-Merged-chr20-43018949-1
chr20	43041234	43041757	H12-Merged-chr20-43041495-1
chr9	81051853	81053358	H12-Merged-chr9-81052605-1
chr9	81210046	81210370	H12-Merged-chr9-81210208-1
chr9	82357601	82357767	H12-Merged-chr9-82357684-1
chr9	84444966	84445132	H12-Merged-chr9-84445049-1
chr9	85813514	85813704	H12-Merged-chr9-85813609-1
chr1	22541198	22541431	H12-Merged-chr1-22541314-1
chr22	39275489	39276414	H12-Merged-chr22-39275951-1
chr20	43289096	43289559	H12-Merged-chr20-43289327-1
chr20	43426300	43427188	H12-Merged-chr20-43426744-1
chr9	86632556	86632769	H12-Merged-chr9-86632662-1
chr9	86726217	86726820	H12-Merged-chr9-86726518-1
chr9	86874684	86875057	H12-Merged-chr9-86874870-1
chr9	86878641	86879425	H12-Merged-chr9-86879033-1
chr9	86886477	86887417	H12-Merged-chr9-86886947-1
chr1	22608139	22608710	H12-Merged-chr1-22608424-1
chr22	39314236	39315033	H12-Merged-chr22-39314634-1
chr1	22616755	22617278	H12-Merged-chr1-22617016-1
chr22	39344374	39345086	H12-Merged-chr22-39344730-1
chr1	22621508	22622086	H12-Merged-chr1-22621797-1
chr1	22625617	22625915	H12-Merged-chr1-22625766-1
chr1	22629939	22630860	H12-Merged-chr1-22630399-1
chr1	22644330	22646769	H12-Merged-chr1-22645549-1
chr20	43432424	43432590	H12-Merged-chr20-43432507-1
chr22	39454980	39456001	H12-Merged-chr22-39455490-1
chr22	39496296	39496656	H12-Merged-chr22-39496476-1
chr1	22654644	22655073	H12-Merged-chr1-22654858-1
chr20	43448808	43449638	H12-Merged-chr20-43449223-1
chr20	43462227	43462752	H12-Merged-chr20-43462489-1
chr20	43497233	43498397	H12-Merged-chr20-43497815-1
chr20	43766489	43766691	H12-Merged-chr20-43766590-1
chr9	87438472	87439045	H12-Merged-chr9-87438758-1
chr9	87458211	87458410	H12-Merged-chr9-87458310-1
chr9	87790606	87790870	H12-Merged-chr9-87790738-1
chr9	88049041	88049302	H12-Merged-chr9-88049171-1
chr22	39553223	39554043	H12-Merged-chr22-39553633-1
chr22	39846039	39846462	H12-Merged-chr22-39846250-1
chr22	39946439	39948274	H12-Merged-chr22-39947356-1
chr20	43817924	43818206	H12-Merged-chr20-43818065-1
chr20	43856776	43856946	H12-Merged-chr20-43856861-1
chr22	40011805	40012369	H12-Merged-chr22-40012087-1
chr9	89993169	89993335	H12-Merged-chr9-89993252-1
chr9	90025824	90026098	H12-Merged-chr9-90025961-1
chr9	90425483	90426519	H12-Merged-chr9-90426001-1
chr22	40023340	40023608	H12-Merged-chr22-40023474-1
chr22	40051323	40051900	H12-Merged-chr22-40051611-1
chr22	40054253	40054968	H12-Merged-chr22-40054610-1
chr20	44094045	44095545	H12-Merged-chr20-44094795-1
chr22	40072051	40072262	H12-Merged-chr22-40072156-1
chr20	44102945	44103407	H12-Merged-chr20-44103176-1
chr22	40090867	40091384	H12-Merged-chr22-40091125-1
chr20	44111141	44111310	H12-Merged-chr20-44111225-1
chr22	40108018	40108772	H12-Merged-chr22-40108395-1
chr9	90691048	90692098	H12-Merged-chr9-90691573-1
chr9	91147276	91148045	H12-Merged-chr9-91147660-1
chr9	91267336	91267727	H12-Merged-chr9-91267531-1
chr9	91576323	91576730	H12-Merged-chr9-91576526-1
chr22	40109451	40109954	H12-Merged-chr22-40109702-1
chr22	40117993	40118563	H12-Merged-chr22-40118278-1
chr22	40131807	40132617	H12-Merged-chr22-40132212-1
chr20	44617408	44618066	H12-Merged-chr20-44617737-1
chr22	40134057	40134340	H12-Merged-chr22-40134198-1
chr22	40176202	40176881	H12-Merged-chr22-40176541-1
chr22	40181488	40181864	H12-Merged-chr22-40181676-1
chr22	40198483	40199138	H12-Merged-chr22-40198810-1
chr9	92182972	92183225	H12-Merged-chr9-92183098-1
chr9	92208262	92208728	H12-Merged-chr9-92208495-1
chr9	92210781	92210955	H12-Merged-chr9-92210868-1
chr9	92241374	92241772	H12-Merged-chr9-92241573-1
chr9	92267106	92267314	H12-Merged-chr9-92267210-1
chr22	40221931	40222110	H12-Merged-chr22-40222020-1
chr22	40224138	40224304	H12-Merged-chr22-40224221-1
chr20	44664534	44665410	H12-Merged-chr20-44664972-1
chr22	40250060	40250226	H12-Merged-chr22-40250143-1
chr20	44678215	44679120	H12-Merged-chr20-44678667-1
chr22	40251713	40252097	H12-Merged-chr22-40251905-1
chr22	40262537	40262739	H12-Merged-chr22-40262638-1
chr20	44741187	44741442	H12-Merged-chr20-44741314-1
chr9	92282733	92282954	H12-Merged-chr9-92282843-1
chr9	92316583	92317024	H12-Merged-chr9-92316803-1
chr9	92684978	92685648	H12-Merged-chr9-92685313-1
chr9	93405002	93405394	H12-Merged-chr9-93405198-1
chr9	93712263	93712433	H12-Merged-chr9-93712348-1
chr9	93717820	93718453	H12-Merged-chr9-93718136-1
chr9	93738129	93738678	H12-Merged-chr9-93738403-1
chr9	93786337	93787083	H12-Merged-chr9-93786710-1
chr9	93793354	93794100	H12-Merged-chr9-93793727-1
chr22	40299534	40300245	H12-Merged-chr22-40299889-1
chr22	40304177	40304410	H12-Merged-chr22-40304293-1
chr22	40321501	40322059	H12-Merged-chr22-40321780-1
chr12	132952672	132953165	H12-Merged-chr12-132952918-1
chr12	132962655	132963135	H12-Merged-chr12-132962895-1
chr12	132998596	133000705	H12-Merged-chr12-132999650-1
chr12	133006351	133006609	H12-Merged-chr12-133006480-1
chr11	120165849	120166159	H12-Merged-chr11-120166004-1
chr11	120380043	120380262	H12-Merged-chr11-120380152-1
chr11	120382901	120383096	H12-Merged-chr11-120382998-1
chr11	120387602	120388230	H12-Merged-chr11-120387916-1
chr11	120393680	120394070	H12-Merged-chr11-120393875-1
chr11	120398951	120399585	H12-Merged-chr11-120399268-1
chr22	40401744	40402803	H12-Merged-chr22-40402273-1
chr22	40429414	40429732	H12-Merged-chr22-40429573-1
chr22	40430917	40431587	H12-Merged-chr22-40431252-1
chr22	40476892	40477492	H12-Merged-chr22-40477192-1
chr12	133012643	133012940	H12-Merged-chr12-133012791-1
chr12	133176013	133176269	H12-Merged-chr12-133176141-1
chr12	133183660	133184190	H12-Merged-chr12-133183925-1
chr11	120551920	120553082	H12-Merged-chr11-120552501-1
chr11	120590237	120591218	H12-Merged-chr11-120590727-1
chr11	120618863	120619481	H12-Merged-chr11-120619172-1
chr11	120661310	120661925	H12-Merged-chr11-120661617-1
chr11	120855261	120859070	H12-Merged-chr11-120857165-1
chr11	121154317	121154564	H12-Merged-chr11-121154440-1
chr13	20529087	20529907	H12-Merged-chr13-20529497-1
chr13	20698120	20698957	H12-Merged-chr13-20698538-1
chr13	20720119	20721152	H12-Merged-chr13-20720635-1
chr11	121316334	121316693	H12-Merged-chr11-121316513-1
chr11	121330040	121330272	H12-Merged-chr11-121330156-1
chr11	121361079	121361383	H12-Merged-chr11-121361231-1
chr11	121453150	121453907	H12-Merged-chr11-121453528-1
chr13	20726346	20726752	H12-Merged-chr13-20726549-1
chr13	20729035	20729236	H12-Merged-chr13-20729135-1
chr11	121458728	121459259	H12-Merged-chr11-121458993-1
chr11	121493205	121493397	H12-Merged-chr11-121493301-1
chr11	121520384	121521911	H12-Merged-chr11-121521147-1
chr11	121633547	121633867	H12-Merged-chr11-121633707-1
chr11	121670837	121671508	H12-Merged-chr11-121671172-1
chr13	20772110	20772628	H12-Merged-chr13-20772369-1
chr13	20775823	20776063	H12-Merged-chr13-20775943-1
chr13	20795767	20796061	H12-Merged-chr13-20795914-1
chr13	20813049	20813705	H12-Merged-chr13-20813377-1
chr13	20831904	20832070	H12-Merged-chr13-20831987-1
chr13	20845477	20845876	H12-Merged-chr13-20845676-1
chr11	121757882	121758450	H12-Merged-chr11-121758166-1
chr11	121799693	121800055	H12-Merged-chr11-121799874-1
chr11	121825812	121826195	H12-Merged-chr11-121826003-1
chr11	121826937	121827337	H12-Merged-chr11-121827137-1
chr11	122088047	122088895	H12-Merged-chr11-122088471-1
chr11	122090084	122090638	H12-Merged-chr11-122090361-1
chr11	122128867	122130089	H12-Merged-chr11-122129478-1
chr11	122158177	122158850	H12-Merged-chr11-122158513-1
chr11	122236268	122236941	H12-Merged-chr11-122236604-1
chr13	20894618	20895281	H12-Merged-chr13-20894949-1
chr13	20947353	20947834	H12-Merged-chr13-20947593-1
chr13	20949919	20950282	H12-Merged-chr13-20950100-1
chr13	21792001	21792248	H12-Merged-chr13-21792124-1
chr13	21800234	21800692	H12-Merged-chr13-21800463-1
chr11	122459289	122459832	H12-Merged-chr11-122459560-1
chr11	122715569	122715920	H12-Merged-chr11-122715744-1
chr11	122835777	122837356	H12-Merged-chr11-122836566-1
chr11	122872545	122872711	H12-Merged-chr11-122872628-1
chr13	21803944	21804616	H12-Merged-chr13-21804280-1
chr13	21856280	21857330	H12-Merged-chr13-21856805-1
chr13	22058152	22058341	H12-Merged-chr13-22058246-1
chr13	24044179	24044679	H12-Merged-chr13-24044429-1
chr11	122873626	122874197	H12-Merged-chr11-122873911-1
chr11	122874933	122875120	H12-Merged-chr11-122875026-1
chr11	122892964	122893286	H12-Merged-chr11-122893125-1
chr11	123099124	123099843	H12-Merged-chr11-123099483-1
chr11	123101799	123101978	H12-Merged-chr11-123101888-1
chr11	123152976	123154060	H12-Merged-chr11-123153518-1
chr13	24087927	24088631	H12-Merged-chr13-24088279-1
chr13	24091663	24091948	H12-Merged-chr13-24091805-1
chr13	24159847	24160246	H12-Merged-chr13-24160046-1
chr11	123179751	123181867	H12-Merged-chr11-123180809-1
chr11	123190407	123191820	H12-Merged-chr11-123191113-1
chr11	123275470	123276306	H12-Merged-chr11-123275888-1
chr13	24162458	24163787	H12-Merged-chr13-24163122-1
chr13	24218344	24218542	H12-Merged-chr13-24218443-1
chr13	24512994	24513206	H12-Merged-chr13-24513100-1
chr13	24578598	24578865	H12-Merged-chr13-24578731-1
chr13	24659194	24659912	H12-Merged-chr13-24659553-1
chr13	24897793	24897982	H12-Merged-chr13-24897887-1
chr11	123431800	123432003	H12-Merged-chr11-123431901-1
chr11	123507485	123508032	H12-Merged-chr11-123507758-1
chr11	123521175	123521341	H12-Merged-chr11-123521258-1
chr13	24977044	24977250	H12-Merged-chr13-24977147-1
chr13	24978972	24979546	H12-Merged-chr13-24979259-1
chr13	25103433	25103981	H12-Merged-chr13-25103707-1
chr13	25153091	25153257	H12-Merged-chr13-25153174-1
chr13	25157333	25157902	H12-Merged-chr13-25157617-1
chr13	25165359	25166720	H12-Merged-chr13-25166039-1
chr11	123937428	123938173	H12-Merged-chr11-123937800-1
chr11	123963936	123964515	H12-Merged-chr11-123964225-1
chr11	124024293	124024528	H12-Merged-chr11-124024410-1
chr11	124058792	124058959	H12-Merged-chr11-124058875-1
chr11	124098945	124099111	H12-Merged-chr11-124099028-1
chr6	150367300	150367965	H12-Merged-chr6-150367632-1
chr19	32834299	32834576	H12-Merged-chr19-32834437-1
chr19	33299386	33300139	H12-Merged-chr19-33299762-1
chr6	150411203	150411857	H12-Merged-chr6-150411530-1
chr6	150415138	150416133	H12-Merged-chr6-150415635-1
chr6	150419436	150419671	H12-Merged-chr6-150419553-1
chr6	150457089	150458003	H12-Merged-chr6-150457546-1
chr19	33723483	33723801	H12-Merged-chr19-33723642-1
chr19	33838462	33838743	H12-Merged-chr19-33838602-1
chr19	34018205	34018706	H12-Merged-chr19-34018455-1
chr6	150497337	150498063	H12-Merged-chr6-150497700-1
chr6	150506522	150507127	H12-Merged-chr6-150506824-1
chr19	34281346	34281783	H12-Merged-chr19-34281564-1
chr6	150541255	150541767	H12-Merged-chr6-150541511-1
chr19	34332708	34333412	H12-Merged-chr19-34333060-1
chr6	150544011	150544610	H12-Merged-chr6-150544310-1
chr19	34385952	34386390	H12-Merged-chr19-34386171-1
chr6	150554377	150555156	H12-Merged-chr6-150554766-1
chr6	150571008	150571254	H12-Merged-chr6-150571131-1
chr19	34494849	34495082	H12-Merged-chr19-34494965-1
chr19	34497602	34497850	H12-Merged-chr19-34497726-1
chr19	34507481	34507787	H12-Merged-chr19-34507634-1
chr19	34521723	34522100	H12-Merged-chr19-34521911-1
chr19	34557116	34557652	H12-Merged-chr19-34557384-1
chr19	34614026	34614348	H12-Merged-chr19-34614187-1
chr19	35044773	35045195	H12-Merged-chr19-35044984-1
chr19	35048807	35049256	H12-Merged-chr19-35049031-1
chr6	150606500	150606692	H12-Merged-chr6-150606596-1
chr19	35209697	35209889	H12-Merged-chr19-35209793-1
chr19	35323720	35323923	H12-Merged-chr19-35323821-1
chr19	35335334	35335542	H12-Merged-chr19-35335438-1
chr6	150623036	150623294	H12-Merged-chr6-150623165-1
chr6	150625437	150626423	H12-Merged-chr6-150625930-1
chr6	150634107	150634997	H12-Merged-chr6-150634552-1
chr19	35607078	35607685	H12-Merged-chr19-35607381-1
chr6	150636130	150636502	H12-Merged-chr6-150636316-1
chr19	35623408	35623791	H12-Merged-chr19-35623599-1
chr6	150638213	150638414	H12-Merged-chr6-150638313-1
chr6	150647890	150648722	H12-Merged-chr6-150648306-1
chr6	150678715	150678891	H12-Merged-chr6-150678803-1
chr19	35683380	35683558	H12-Merged-chr19-35683469-1
chr19	35684473	35686063	H12-Merged-chr19-35685268-1
chr19	35691538	35691722	H12-Merged-chr19-35691630-1
chr19	35733395	35733643	H12-Merged-chr19-35733519-1
chr19	35850468	35851168	H12-Merged-chr19-35850818-1
chr6	150713214	150713534	H12-Merged-chr6-150713374-1
chr6	150731138	150731778	H12-Merged-chr6-150731458-1
chr19	35924545	35924723	H12-Merged-chr19-35924634-1
chr19	35982699	35982995	H12-Merged-chr19-35982847-1
chr6	150764262	150764729	H12-Merged-chr6-150764495-1
chr6	150784710	150785493	H12-Merged-chr6-150785101-1
chr19	36020154	36020415	H12-Merged-chr19-36020284-1
chr6	150826092	150826307	H12-Merged-chr6-150826199-1
chr6	150854141	150854602	H12-Merged-chr6-150854371-1
chr6	150856910	150857665	H12-Merged-chr6-150857287-1
chr19	36174609	36175124	H12-Merged-chr19-36174866-1
chr19	36342243	36342621	H12-Merged-chr19-36342432-1
chr19	36343441	36343757	H12-Merged-chr19-36343599-1
chr6	150873944	150874723	H12-Merged-chr6-150874333-1
chr19	36416757	36417754	H12-Merged-chr19-36417255-1
chr6	150887581	150887883	H12-Merged-chr6-150887732-1
chr6	150896762	150897522	H12-Merged-chr6-150897142-1
chr19	36468585	36468764	H12-Merged-chr19-36468674-1
chr19	36480610	36481064	H12-Merged-chr19-36480837-1
chr6	151910760	151911129	H12-Merged-chr6-151910944-1
chr6	152122887	152123099	H12-Merged-chr6-152122993-1
chr6	152123782	152123982	H12-Merged-chr6-152123882-1
chr19	38846975	38847268	H12-Merged-chr19-38847121-1
chr19	38908245	38909263	H12-Merged-chr19-38908754-1
chr19	38982894	38983468	H12-Merged-chr19-38983181-1
chr19	39271347	39271573	H12-Merged-chr19-39271460-1
chr19	39610759	39610955	H12-Merged-chr19-39610857-1
chr19	39679846	39680890	H12-Merged-chr19-39680368-1
chr19	39718774	39719528	H12-Merged-chr19-39719151-1
chr19	39729258	39729757	H12-Merged-chr19-39729507-1
chr10	102174368	102174825	H12-Merged-chr10-102174596-1
chr10	102211065	102211728	H12-Merged-chr10-102211396-1
chr10	102225217	102225458	H12-Merged-chr10-102225337-1
chr1	228309900	228310140	H12-Merged-chr1-228310020-1
chr1	228312044	228312242	H12-Merged-chr1-228312143-1
chr1	228447009	228447710	H12-Merged-chr1-228447359-1
chr10	102228555	102229012	H12-Merged-chr10-102228783-1
chr10	102233399	102233952	H12-Merged-chr10-102233675-1
chr10	102358950	102359361	H12-Merged-chr10-102359155-1
chr1	228698113	228698287	H12-Merged-chr1-228698200-1
chr10	102368025	102368384	H12-Merged-chr10-102368204-1
chr10	102387440	102387838	H12-Merged-chr10-102387639-1
chr10	102397059	102398018	H12-Merged-chr10-102397538-1
chr10	102406406	102407039	H12-Merged-chr10-102406722-1
chr1	228747788	228748436	H12-Merged-chr1-228748112-1
chr1	228749354	228749927	H12-Merged-chr1-228749640-1
chr1	228754217	228754657	H12-Merged-chr1-228754437-1
chr1	228760794	228761914	H12-Merged-chr1-228761354-1
chr10	102433938	102434533	H12-Merged-chr10-102434235-1
chr10	102439017	102439192	H12-Merged-chr10-102439104-1
chr10	102460643	102460811	H12-Merged-chr10-102460727-1
chr10	102466518	102466835	H12-Merged-chr10-102466676-1
chr1	228762944	228763637	H12-Merged-chr1-228763290-1
chr1	228769438	228770414	H12-Merged-chr1-228769926-1
chr10	102526437	102527196	H12-Merged-chr10-102526816-1
chr10	102529838	102530265	H12-Merged-chr10-102530051-1
chr10	102537967	102538267	H12-Merged-chr10-102538117-1
chr1	228865967	228866157	H12-Merged-chr1-228866062-1
chr1	228891075	228891422	H12-Merged-chr1-228891248-1
chr1	229035643	229036977	H12-Merged-chr1-229036310-1
chr1	229203369	229203545	H12-Merged-chr1-229203457-1
chr1	229365046	229366225	H12-Merged-chr1-229365635-1
chr1	229481900	229482332	H12-Merged-chr1-229482116-1
chr10	102594447	102594930	H12-Merged-chr10-102594688-1
chr1	229516613	229517151	H12-Merged-chr1-229516882-1
chr1	229532854	229533238	H12-Merged-chr1-229533046-1
chr1	230135269	230135720	H12-Merged-chr1-230135494-1
chr10	102602463	102602657	H12-Merged-chr10-102602560-1
chr10	102613067	102613566	H12-Merged-chr10-102613316-1
chr10	102636715	102637553	H12-Merged-chr10-102637134-1
chr1	230849917	230850434	H12-Merged-chr1-230850175-1
chr1	230937004	230937580	H12-Merged-chr1-230937292-1
chr1	230956320	230957066	H12-Merged-chr1-230956693-1
chr1	231179470	231180953	H12-Merged-chr1-231180211-1
chr10	102638777	102639321	H12-Merged-chr10-102639049-1
chr10	102836549	102836769	H12-Merged-chr10-102836659-1
chr10	102840149	102841571	H12-Merged-chr10-102840860-1
chr1	231184231	231184487	H12-Merged-chr1-231184359-1
chr1	231190269	231191623	H12-Merged-chr1-231190946-1
chr1	231192935	231193398	H12-Merged-chr1-231193166-1
chr1	231247011	231247250	H12-Merged-chr1-231247130-1
chr1	231258488	231259313	H12-Merged-chr1-231258900-1
chr1	231261553	231262142	H12-Merged-chr1-231261847-1
chr1	231278574	231278836	H12-Merged-chr1-231278705-1
chr1	231286222	231287494	H12-Merged-chr1-231286858-1
chr1	231294093	231294546	H12-Merged-chr1-231294319-1
chr1	231323450	231323806	H12-Merged-chr1-231323628-1
chr10	102915776	102916378	H12-Merged-chr10-102916077-1
chr10	102947197	102947918	H12-Merged-chr10-102947557-1
chr1	231348424	231348613	H12-Merged-chr1-231348518-1
chr1	231349796	231350009	H12-Merged-chr1-231349902-1
chr1	231350860	231351265	H12-Merged-chr1-231351062-1
chr1	231747000	231747780	H12-Merged-chr1-231747390-1
chr1	231748910	231750913	H12-Merged-chr1-231749911-1
chr1	231755967	231756160	H12-Merged-chr1-231756063-1
chr1	232376240	232377141	H12-Merged-chr1-232376690-1
chr4	47685359	47685944	H12-Merged-chr4-47685651-1
chr4	47715579	47716103	H12-Merged-chr4-47715841-1
chr4	47723403	47723580	H12-Merged-chr4-47723491-1
chr4	47725051	47725950	H12-Merged-chr4-47725500-1
chr4	47776273	47776778	H12-Merged-chr4-47776525-1
chr4	47777715	47778405	H12-Merged-chr4-47778060-1
chr4	47811795	47812046	H12-Merged-chr4-47811920-1
chr4	47924324	47925529	H12-Merged-chr4-47924926-1
chr4	48159394	48159821	H12-Merged-chr4-48159607-1
chr4	48209990	48210730	H12-Merged-chr4-48210360-1
chr4	48227288	48227511	H12-Merged-chr4-48227399-1
chr4	48297828	48298591	H12-Merged-chr4-48298209-1
chr15	70436690	70437198	H12-Merged-chr15-70436944-1
chr15	70439433	70439768	H12-Merged-chr15-70439600-1
chr15	70440997	70441197	H12-Merged-chr15-70441097-1
chr15	70449973	70450475	H12-Merged-chr15-70450224-1
chr15	70463191	70463567	H12-Merged-chr15-70463379-1
chr15	70464504	70464852	H12-Merged-chr15-70464678-1
chr15	70498550	70498897	H12-Merged-chr15-70498723-1
chr15	70518388	70518650	H12-Merged-chr15-70518519-1
chr15	70530783	70531536	H12-Merged-chr15-70531159-1
chr15	70555415	70556523	H12-Merged-chr15-70555969-1
chr15	70590149	70590798	H12-Merged-chr15-70590473-1
chr15	70647700	70647907	H12-Merged-chr15-70647803-1
chr15	70657978	70658303	H12-Merged-chr15-70658140-1
chr4	52799031	52799697	H12-Merged-chr4-52799364-1
chr15	70723939	70724479	H12-Merged-chr15-70724209-1
chr4	52941204	52941979	H12-Merged-chr4-52941591-1
chr4	53413057	53413294	H12-Merged-chr4-53413175-1
chr4	53538675	53538910	H12-Merged-chr4-53538792-1
chr15	70812145	70812674	H12-Merged-chr15-70812409-1
chr4	53566548	53566775	H12-Merged-chr4-53566661-1
chr15	70833819	70834729	H12-Merged-chr15-70834274-1
chr4	53703902	53704541	H12-Merged-chr4-53704221-1
chr15	70851154	70851595	H12-Merged-chr15-70851374-1
chr4	53710059	53710265	H12-Merged-chr4-53710162-1
chr15	70852322	70852747	H12-Merged-chr15-70852534-1
chr4	54235981	54237020	H12-Merged-chr4-54236500-1
chr15	70855849	70856154	H12-Merged-chr15-70856001-1
chr15	70867653	70868439	H12-Merged-chr15-70868046-1
chr15	70872446	70874651	H12-Merged-chr15-70873548-1
chr4	54487642	54488709	H12-Merged-chr4-54488175-1
chr15	70908939	70909472	H12-Merged-chr15-70909205-1
chr4	54500570	54501357	H12-Merged-chr4-54500963-1
chr15	72478708	72478889	H12-Merged-chr15-72478798-1
chr4	54516382	54516959	H12-Merged-chr4-54516670-1
chr4	54521494	54521769	H12-Merged-chr4-54521631-1
chr4	54536854	54537442	H12-Merged-chr4-54537148-1
chr15	72589086	72589686	H12-Merged-chr15-72589386-1
chr15	72690989	72691404	H12-Merged-chr15-72691196-1
chr4	54551376	54553461	H12-Merged-chr4-54552418-1
chr15	72699381	72700867	H12-Merged-chr15-72700124-1
chr4	54620223	54620779	H12-Merged-chr4-54620501-1
chr15	72729053	72729661	H12-Merged-chr15-72729357-1
chr15	72900688	72901504	H12-Merged-chr15-72901096-1
chr4	54669829	54670096	H12-Merged-chr4-54669962-1
chr4	54675164	54675365	H12-Merged-chr4-54675264-1
chr4	54723464	54723630	H12-Merged-chr4-54723547-1
chr4	54734478	54734746	H12-Merged-chr4-54734612-1
chr4	54737218	54737495	H12-Merged-chr4-54737356-1
chr15	72912172	72912709	H12-Merged-chr15-72912440-1
chr15	72951792	72952880	H12-Merged-chr15-72952336-1
chr15	72956595	72956895	H12-Merged-chr15-72956745-1
chr15	72959415	72959848	H12-Merged-chr15-72959631-1
chr15	72969639	72969871	H12-Merged-chr15-72969755-1
chr4	54971465	54971865	H12-Merged-chr4-54971665-1
chr15	73082001	73082734	H12-Merged-chr15-73082367-1
chr15	73143389	73144089	H12-Merged-chr15-73143739-1
chr15	73194869	73195474	H12-Merged-chr15-73195171-1
chr4	55159669	55159949	H12-Merged-chr4-55159809-1
chr4	55160800	55161194	H12-Merged-chr4-55160997-1
chr4	55275172	55275897	H12-Merged-chr4-55275534-1
chr4	55292524	55293000	H12-Merged-chr4-55292762-1
chr15	73288062	73289148	H12-Merged-chr15-73288605-1
chr15	73324193	73324844	H12-Merged-chr15-73324518-1
chr15	73330597	73331301	H12-Merged-chr15-73330949-1
chr4	55299025	55299720	H12-Merged-chr4-55299372-1
chr15	73335722	73336231	H12-Merged-chr15-73335976-1
chr4	55416031	55416820	H12-Merged-chr4-55416425-1
chr4	55452821	55453076	H12-Merged-chr4-55452948-1
chr15	73350610	73350804	H12-Merged-chr15-73350707-1
chr4	55536935	55537548	H12-Merged-chr4-55537241-1
chr4	55543030	55543790	H12-Merged-chr4-55543410-1
chr4	55649229	55649923	H12-Merged-chr4-55649576-1
chr15	73352672	73354439	H12-Merged-chr15-73353555-1
chr15	73358495	73359263	H12-Merged-chr15-73358879-1
chr15	73377224	73377607	H12-Merged-chr15-73377415-1
chr15	73387249	73387432	H12-Merged-chr15-73387340-1
chr15	73388841	73389961	H12-Merged-chr15-73389401-1
chr15	73406504	73406675	H12-Merged-chr15-73406589-1
chr15	73415834	73416500	H12-Merged-chr15-73416167-1
chr15	73812666	73812867	H12-Merged-chr15-73812766-1
chr1	22656392	22657058	H12-Merged-chr1-22656725-1
chr1	22657799	22658326	H12-Merged-chr1-22658062-1
chr1	22671449	22671750	H12-Merged-chr1-22671599-1
chr1	22683909	22684635	H12-Merged-chr1-22684272-1
chr1	22706404	22707140	H12-Merged-chr1-22706772-1
chr1	22714362	22715397	H12-Merged-chr1-22714879-1
chr1	22716081	22716937	H12-Merged-chr1-22716509-1
chr1	22723849	22724208	H12-Merged-chr1-22724028-1
chr1	22732973	22733327	H12-Merged-chr1-22733150-1
chr1	22895249	22895793	H12-Merged-chr1-22895521-1
chr1	22932684	22933070	H12-Merged-chr1-22932877-1
chr1	22935377	22935624	H12-Merged-chr1-22935500-1
chr1	22961191	22961804	H12-Merged-chr1-22961497-1
chr1	23298910	23299301	H12-Merged-chr1-23299105-1
chr1	23326343	23326625	H12-Merged-chr1-23326484-1
chr20	44757573	44757792	H12-Merged-chr20-44757682-1
chr1	23913883	23914184	H12-Merged-chr1-23914033-1
chr20	44758679	44759867	H12-Merged-chr20-44759273-1
chr20	44763459	44763686	H12-Merged-chr20-44763572-1
chr20	44764673	44765423	H12-Merged-chr20-44765048-1
chr20	44783219	44783677	H12-Merged-chr20-44783448-1
chr9	93864429	93864645	H12-Merged-chr9-93864537-1
chr9	93878561	93880117	H12-Merged-chr9-93879339-1
chr9	94204676	94204910	H12-Merged-chr9-94204793-1
chr9	94605958	94606406	H12-Merged-chr9-94606182-1
chr9	94661992	94662718	H12-Merged-chr9-94662355-1
chr9	94782595	94783007	H12-Merged-chr9-94782801-1
chr9	94881658	94881896	H12-Merged-chr9-94881777-1
chr1	23936946	23937403	H12-Merged-chr1-23937174-1
chr1	23940983	23941439	H12-Merged-chr1-23941211-1
chr1	23942133	23942909	H12-Merged-chr1-23942521-1
chr1	23965982	23966337	H12-Merged-chr1-23966159-1
chr1	23980752	23981479	H12-Merged-chr1-23981115-1
chr20	44853053	44853761	H12-Merged-chr20-44853407-1
chr20	44875361	44875616	H12-Merged-chr20-44875488-1
chr20	44886852	44887446	H12-Merged-chr20-44887149-1
chr20	44931046	44932666	H12-Merged-chr20-44931856-1
chr20	44962808	44963076	H12-Merged-chr20-44962942-1
chr20	44967705	44968384	H12-Merged-chr20-44968044-1
chr9	95453614	95453890	H12-Merged-chr9-95453752-1
chr9	95587702	95588011	H12-Merged-chr9-95587856-1
chr1	24010547	24011495	H12-Merged-chr1-24011021-1
chr1	24197312	24197509	H12-Merged-chr1-24197410-1
chr1	24201020	24201817	H12-Merged-chr1-24201418-1
chr20	45045186	45045794	H12-Merged-chr20-45045490-1
chr1	24505852	24506295	H12-Merged-chr1-24506073-1
chr20	45074307	45074524	H12-Merged-chr20-45074415-1
chr20	45170260	45170463	H12-Merged-chr20-45170361-1
chr20	45200846	45201235	H12-Merged-chr20-45201040-1
chr20	45212082	45212767	H12-Merged-chr20-45212424-1
chr9	95941651	95941921	H12-Merged-chr9-95941786-1
chr9	96044037	96044622	H12-Merged-chr9-96044329-1
chr9	96157745	96157911	H12-Merged-chr9-96157828-1
chr1	24532930	24533492	H12-Merged-chr1-24533211-1
chr1	24543694	24543860	H12-Merged-chr1-24543777-1
chr1	24580795	24581524	H12-Merged-chr1-24581159-1
chr1	24585109	24585313	H12-Merged-chr1-24585211-1
chr1	24590556	24592291	H12-Merged-chr1-24591423-1
chr20	45372425	45373117	H12-Merged-chr20-45372771-1
chr20	45375349	45375987	H12-Merged-chr20-45375668-1
chr20	45377812	45378100	H12-Merged-chr20-45377956-1
chr20	45525950	45526721	H12-Merged-chr20-45526335-1
chr20	45770904	45771646	H12-Merged-chr20-45771275-1
chr20	45817737	45817976	H12-Merged-chr20-45817856-1
chr9	96182272	96182482	H12-Merged-chr9-96182377-1
chr9	96551653	96551932	H12-Merged-chr9-96551792-1
chr9	96571030	96571222	H12-Merged-chr9-96571126-1
chr9	96676519	96677112	H12-Merged-chr9-96676815-1
chr9	96694367	96694722	H12-Merged-chr9-96694544-1
chr9	96759655	96759894	H12-Merged-chr9-96759774-1
chr1	24617631	24618286	H12-Merged-chr1-24617958-1
chr1	24629429	24630097	H12-Merged-chr1-24629763-1
chr1	24631176	24631593	H12-Merged-chr1-24631384-1
chr20	46446854	46447449	H12-Merged-chr20-46447151-1
chr20	46449028	46449393	H12-Merged-chr20-46449210-1
chr20	46474246	46474574	H12-Merged-chr20-46474410-1
chr20	46550150	46550819	H12-Merged-chr20-46550484-1
chr20	46565561	46565793	H12-Merged-chr20-46565677-1
chr20	46692301	46692551	H12-Merged-chr20-46692426-1
chr9	96979403	96979915	H12-Merged-chr9-96979659-1
chr9	97126207	97126373	H12-Merged-chr9-97126290-1
chr9	97272750	97273075	H12-Merged-chr9-97272912-1
chr9	97351167	97351802	H12-Merged-chr9-97351484-1
chr9	97394118	97395472	H12-Merged-chr9-97394795-1
chr9	97424995	97425792	H12-Merged-chr9-97425393-1
chr1	24817446	24817873	H12-Merged-chr1-24817659-1
chr1	24833604	24833770	H12-Merged-chr1-24833687-1
chr1	24875473	24875978	H12-Merged-chr1-24875725-1
chr1	24936979	24937203	H12-Merged-chr1-24937091-1
chr20	46711453	46711808	H12-Merged-chr20-46711630-1
chr1	24948802	24949638	H12-Merged-chr1-24949220-1
chr1	24951228	24951666	H12-Merged-chr1-24951447-1
chr20	46753163	46753405	H12-Merged-chr20-46753284-1
chr20	46792915	46793207	H12-Merged-chr20-46793061-1
chr20	46804051	46804331	H12-Merged-chr20-46804191-1
chr20	46862555	46863118	H12-Merged-chr20-46862836-1
chr20	46876956	46877606	H12-Merged-chr20-46877281-1
chr20	46886759	46889398	H12-Merged-chr20-46888078-1
chr9	97478369	97479071	H12-Merged-chr9-97478720-1
chr9	98167993	98168401	H12-Merged-chr9-98168197-1
chr9	98293367	98293598	H12-Merged-chr9-98293482-1
chr9	98294349	98294643	H12-Merged-chr9-98294496-1
chr20	46892456	46892641	H12-Merged-chr20-46892548-1
chr20	46893338	46893841	H12-Merged-chr20-46893589-1
chr20	46896149	46896332	H12-Merged-chr20-46896240-1
chr20	46942879	46943074	H12-Merged-chr20-46942976-1
chr20	47022668	47023976	H12-Merged-chr20-47023322-1
chr20	47039165	47039974	H12-Merged-chr20-47039569-1
chr9	98469043	98469678	H12-Merged-chr9-98469360-1
chr9	98806738	98807542	H12-Merged-chr9-98807140-1
chr9	98809144	98809851	H12-Merged-chr9-98809497-1
chr9	98816015	98816413	H12-Merged-chr9-98816214-1
chr9	98819546	98819712	H12-Merged-chr9-98819629-1
chr9	98843159	98843482	H12-Merged-chr9-98843320-1
chr20	47110685	47111936	H12-Merged-chr20-47111310-1
chr20	47943312	47943900	H12-Merged-chr20-47943606-1
chr20	47949276	47949638	H12-Merged-chr20-47949457-1
chr20	47963874	47964591	H12-Merged-chr20-47964232-1
chr20	47965801	47966454	H12-Merged-chr20-47966127-1
chr9	98977947	98978449	H12-Merged-chr9-98978198-1
chr9	99023530	99024034	H12-Merged-chr9-99023782-1
chr9	99058664	99059116	H12-Merged-chr9-99058890-1
chr9	99266406	99267096	H12-Merged-chr9-99266751-1
chr20	47976975	47977302	H12-Merged-chr20-47977138-1
chr20	47979099	47979586	H12-Merged-chr20-47979342-1
chr20	47989072	47989856	H12-Merged-chr20-47989464-1
chr20	47990769	47991268	H12-Merged-chr20-47991018-1
chr20	48020545	48021155	H12-Merged-chr20-48020850-1
chr20	48023240	48023447	H12-Merged-chr20-48023343-1
chr9	99334114	99334406	H12-Merged-chr9-99334260-1
chr9	99371305	99371496	H12-Merged-chr9-99371400-1
chr9	99396039	99396712	H12-Merged-chr9-99396375-1
chr9	99484669	99485076	H12-Merged-chr9-99484872-1
chr20	48033817	48034341	H12-Merged-chr20-48034079-1
chr20	48042882	48044301	H12-Merged-chr20-48043591-1
chr20	48046910	48047080	H12-Merged-chr20-48046995-1
chr20	48053778	48053944	H12-Merged-chr20-48053861-1
chr20	48055832	48056219	H12-Merged-chr20-48056025-1
chr20	48076761	48077779	H12-Merged-chr20-48077270-1
chr9	99786223	99786457	H12-Merged-chr9-99786340-1
chr9	99809547	99809996	H12-Merged-chr9-99809771-1
chr9	99846754	99847007	H12-Merged-chr9-99846880-1
chr13	25186252	25186450	H12-Merged-chr13-25186351-1
chr13	25317298	25317776	H12-Merged-chr13-25317537-1
chr13	25419739	25420172	H12-Merged-chr13-25419955-1
chr13	25499832	25500182	H12-Merged-chr13-25500007-1
chr11	124134948	124135648	H12-Merged-chr11-124135298-1
chr11	124191565	124191731	H12-Merged-chr11-124191648-1
chr11	124195939	124196112	H12-Merged-chr11-124196025-1
chr11	124197346	124197701	H12-Merged-chr11-124197523-1
chr11	124289805	124290101	H12-Merged-chr11-124289953-1
chr11	124303915	124304785	H12-Merged-chr11-124304350-1
chr11	124308802	124309253	H12-Merged-chr11-124309027-1
chr11	124414261	124414488	H12-Merged-chr11-124414374-1
chr13	25531616	25532047	H12-Merged-chr13-25531831-1
chr13	25536824	25537327	H12-Merged-chr13-25537075-1
chr13	25550719	25550983	H12-Merged-chr13-25550851-1
chr13	25595397	25596145	H12-Merged-chr13-25595771-1
chr11	124454570	124454736	H12-Merged-chr11-124454653-1
chr11	124483774	124485081	H12-Merged-chr11-124484427-1
chr11	124692272	124692928	H12-Merged-chr11-124692600-1
chr13	25685599	25685765	H12-Merged-chr13-25685682-1
chr13	25692731	25693211	H12-Merged-chr13-25692971-1
chr13	25725904	25727401	H12-Merged-chr13-25726652-1
chr13	25753224	25753419	H12-Merged-chr13-25753321-1
chr13	25756894	25757269	H12-Merged-chr13-25757081-1
chr13	25766774	25767282	H12-Merged-chr13-25767028-1
chr13	25777622	25777810	H12-Merged-chr13-25777716-1
chr11	125002906	125003194	H12-Merged-chr11-125003050-1
chr11	125009423	125010443	H12-Merged-chr11-125009933-1
chr11	125021795	125022411	H12-Merged-chr11-125022103-1
chr13	25872045	25873327	H12-Merged-chr13-25872686-1
chr13	25926090	25926788	H12-Merged-chr13-25926439-1
chr13	25943017	25943681	H12-Merged-chr13-25943349-1
chr13	25955850	25956226	H12-Merged-chr13-25956038-1
chr13	26047045	26047284	H12-Merged-chr13-26047164-1
chr11	125040226	125042040	H12-Merged-chr11-125041133-1
chr11	125046423	125047549	H12-Merged-chr11-125046986-1
chr11	125058767	125060274	H12-Merged-chr11-125059520-1
chr11	125061265	125061551	H12-Merged-chr11-125061408-1
chr11	125072195	125072510	H12-Merged-chr11-125072352-1
chr13	26144416	26144644	H12-Merged-chr13-26144530-1
chr13	26525036	26525617	H12-Merged-chr13-26525326-1
chr13	26528579	26528811	H12-Merged-chr13-26528695-1
chr13	26649046	26649859	H12-Merged-chr13-26649452-1
chr13	26663310	26663576	H12-Merged-chr13-26663443-1
chr13	26739198	26739844	H12-Merged-chr13-26739521-1
chr11	125141352	125141793	H12-Merged-chr11-125141572-1
chr13	26743109	26743572	H12-Merged-chr13-26743340-1
chr13	26800618	26801180	H12-Merged-chr13-26800899-1
chr13	26822714	26823473	H12-Merged-chr13-26823093-1
chr13	27022254	27022470	H12-Merged-chr13-27022362-1
chr13	27069370	27070133	H12-Merged-chr13-27069751-1
chr13	27124838	27126262	H12-Merged-chr13-27125550-1
chr11	125142772	125143295	H12-Merged-chr11-125143033-1
chr11	125144928	125145559	H12-Merged-chr11-125145243-1
chr11	125146581	125147036	H12-Merged-chr11-125146808-1
chr11	125182287	125182491	H12-Merged-chr11-125182389-1
chr13	27284436	27285033	H12-Merged-chr13-27284734-1
chr13	27338802	27338968	H12-Merged-chr13-27338885-1
chr13	27382784	27383238	H12-Merged-chr13-27383011-1
chr13	27432108	27432369	H12-Merged-chr13-27432238-1
chr13	27455236	27455681	H12-Merged-chr13-27455458-1
chr11	125214809	125215504	H12-Merged-chr11-125215156-1
chr11	125217210	125217956	H12-Merged-chr11-125217583-1
chr11	125240198	125240713	H12-Merged-chr11-125240455-1
chr11	125247353	125248466	H12-Merged-chr11-125247909-1
chr11	125277049	125277546	H12-Merged-chr11-125277297-1
chr13	27481816	27482756	H12-Merged-chr13-27482286-1
chr13	27500571	27501409	H12-Merged-chr13-27500990-1
chr13	27517701	27518460	H12-Merged-chr13-27518080-1
chr13	27529469	27529852	H12-Merged-chr13-27529660-1
chr13	27575780	27576083	H12-Merged-chr13-27575931-1
chr11	125370980	125371184	H12-Merged-chr11-125371082-1
chr11	125427582	125427748	H12-Merged-chr11-125427665-1
chr11	125792156	125792425	H12-Merged-chr11-125792290-1
chr11	125926088	125926254	H12-Merged-chr11-125926171-1
chr13	27795979	27796657	H12-Merged-chr13-27796318-1
chr13	27803781	27804540	H12-Merged-chr13-27804160-1
chr13	27872358	27872535	H12-Merged-chr13-27872446-1
chr13	27875128	27875294	H12-Merged-chr13-27875211-1
chr11	125968293	125968662	H12-Merged-chr11-125968477-1
chr11	126037594	126037965	H12-Merged-chr11-126037779-1
chr11	126334523	126334870	H12-Merged-chr11-126334696-1
chr11	126353476	126353946	H12-Merged-chr11-126353711-1
chr11	126413788	126414564	H12-Merged-chr11-126414176-1
chr11	126459779	126460418	H12-Merged-chr11-126460098-1
chr13	27878331	27878919	H12-Merged-chr13-27878625-1
chr13	27927628	27928433	H12-Merged-chr13-27928030-1
chr13	27929798	27930407	H12-Merged-chr13-27930102-1
chr13	27946181	27947175	H12-Merged-chr13-27946678-1
chr13	27954574	27955332	H12-Merged-chr13-27954953-1
chr13	27957377	27957561	H12-Merged-chr13-27957469-1
chr13	27959897	27960299	H12-Merged-chr13-27960098-1
chr11	128749187	128749512	H12-Merged-chr11-128749349-1
chr6	152136587	152136943	H12-Merged-chr6-152136765-1
chr6	152312867	152313140	H12-Merged-chr6-152313003-1
chr6	152335052	152335246	H12-Merged-chr6-152335149-1
chr6	156961346	156961725	H12-Merged-chr6-156961535-1
chr6	157047383	157047747	H12-Merged-chr6-157047565-1
chr6	157553346	157553766	H12-Merged-chr6-157553556-1
chr6	157618563	157618750	H12-Merged-chr6-157618656-1
chr6	157627127	157627345	H12-Merged-chr6-157627236-1
chr6	157641061	157641251	H12-Merged-chr6-157641156-1
chr19	39733022	39733495	H12-Merged-chr19-39733258-1
chr19	39743398	39743917	H12-Merged-chr19-39743657-1
chr19	39744830	39745927	H12-Merged-chr19-39745378-1
chr6	157759426	157759706	H12-Merged-chr6-157759566-1
chr19	39762767	39763001	H12-Merged-chr19-39762884-1
chr19	39773303	39773719	H12-Merged-chr19-39773511-1
chr6	157787298	157787922	H12-Merged-chr6-157787610-1
chr6	158134964	158135607	H12-Merged-chr6-158135285-1
chr19	39784180	39784878	H12-Merged-chr19-39784529-1
chr19	39986881	39987123	H12-Merged-chr19-39987002-1
chr6	158143514	158143743	H12-Merged-chr6-158143628-1
chr6	158173185	158174045	H12-Merged-chr6-158173615-1
chr6	158174981	158175147	H12-Merged-chr6-158175064-1
chr6	158199262	158200342	H12-Merged-chr6-158199802-1
chr6	158948016	158948606	H12-Merged-chr6-158948311-1
chr19	40043816	40044181	H12-Merged-chr19-40043998-1
chr19	40182555	40182995	H12-Merged-chr19-40182775-1
chr19	40247144	40247857	H12-Merged-chr19-40247500-1
chr19	40397206	40397774	H12-Merged-chr19-40397490-1
chr6	158967656	158967898	H12-Merged-chr6-158967777-1
chr6	159332710	159332958	H12-Merged-chr6-159332834-1
chr19	40447030	40447284	H12-Merged-chr19-40447157-1
chr6	159366854	159367020	H12-Merged-chr6-159366937-1
chr6	159459522	159460239	H12-Merged-chr6-159459880-1
chr6	159498257	159498495	H12-Merged-chr6-159498376-1
chr6	159511878	159512322	H12-Merged-chr6-159512100-1
chr6	159594312	159594479	H12-Merged-chr6-159594395-1
chr19	41023259	41023710	H12-Merged-chr19-41023484-1
chr19	41030969	41031441	H12-Merged-chr19-41031205-1
chr6	159654772	159655465	H12-Merged-chr6-159655118-1
chr6	160017948	160018661	H12-Merged-chr6-160018304-1
chr6	160240281	160240538	H12-Merged-chr6-160240409-1
chr6	161408976	161409580	H12-Merged-chr6-161409278-1
chr6	161702306	161702511	H12-Merged-chr6-161702408-1
chr6	163597624	163599462	H12-Merged-chr6-163598543-1
chr6	164500347	164500604	H12-Merged-chr6-164500475-1
chr6	166078763	166078940	H12-Merged-chr6-166078851-1
chr6	166115242	166115429	H12-Merged-chr6-166115335-1
chr19	41376504	41377214	H12-Merged-chr19-41376859-1
chr6	166247013	166247671	H12-Merged-chr6-166247342-1
chr6	166274908	166275118	H12-Merged-chr6-166275013-1
chr19	41394433	41394837	H12-Merged-chr19-41394635-1
chr19	41396412	41397314	H12-Merged-chr19-41396863-1
chr19	41418939	41419346	H12-Merged-chr19-41419142-1
chr6	166586775	166587062	H12-Merged-chr6-166586918-1
chr19	41467967	41468525	H12-Merged-chr19-41468246-1
chr6	166695247	166695621	H12-Merged-chr6-166695434-1
chr19	41483534	41483962	H12-Merged-chr19-41483748-1
chr19	41495589	41496063	H12-Merged-chr19-41495826-1
chr6	166705808	166706215	H12-Merged-chr6-166706011-1
chr19	41587499	41588181	H12-Merged-chr19-41587840-1
chr19	41638397	41639006	H12-Merged-chr19-41638701-1
chr6	166765539	166765742	H12-Merged-chr6-166765640-1
chr19	41639965	41640849	H12-Merged-chr19-41640407-1
chr6	166804069	166804739	H12-Merged-chr6-166804404-1
chr19	42015949	42017155	H12-Merged-chr19-42016552-1
chr6	167111308	167112289	H12-Merged-chr6-167111798-1
chr19	42017997	42018781	H12-Merged-chr19-42018389-1
chr6	167130465	167131137	H12-Merged-chr6-167130801-1
chr6	167771795	167772016	H12-Merged-chr6-167771905-1
chr19	42031483	42032142	H12-Merged-chr19-42031812-1
chr19	42045218	42045384	H12-Merged-chr19-42045301-1
chr19	42081933	42082727	H12-Merged-chr19-42082330-1
chr19	42083623	42084013	H12-Merged-chr19-42083818-1
chr19	42145339	42146190	H12-Merged-chr19-42145764-1
chr19	42157045	42157302	H12-Merged-chr19-42157173-1
chr19	42256116	42256661	H12-Merged-chr19-42256388-1
chr19	42262869	42263072	H12-Merged-chr19-42262970-1
chr19	42291154	42293543	H12-Merged-chr19-42292348-1
chr19	42343256	42343718	H12-Merged-chr19-42343487-1
chr10	103013429	103014620	H12-Merged-chr10-103014024-1
chr10	103015499	103015969	H12-Merged-chr10-103015734-1
chr1	232519406	232519580	H12-Merged-chr1-232519493-1
chr10	103029205	103029486	H12-Merged-chr10-103029345-1
chr10	103030722	103031707	H12-Merged-chr10-103031214-1
chr10	103036198	103036557	H12-Merged-chr10-103036377-1
chr10	103060488	103060656	H12-Merged-chr10-103060572-1
chr1	234918301	234918766	H12-Merged-chr1-234918533-1
chr1	234920478	234920978	H12-Merged-chr1-234920728-1
chr1	234923810	234924046	H12-Merged-chr1-234923928-1
chr1	234955030	234955595	H12-Merged-chr1-234955312-1
chr10	103082455	103082819	H12-Merged-chr10-103082637-1
chr10	103099458	103099794	H12-Merged-chr10-103099626-1
chr10	103108448	103108680	H12-Merged-chr10-103108564-1
chr10	103109707	103110013	H12-Merged-chr10-103109860-1
chr10	103323064	103323471	H12-Merged-chr10-103323267-1
chr1	235786896	235787454	H12-Merged-chr1-235787175-1
chr1	235817625	235817849	H12-Merged-chr1-235817737-1
chr10	103494538	103495267	H12-Merged-chr10-103494902-1
chr10	103517938	103518424	H12-Merged-chr10-103518181-1
chr10	103522740	103523807	H12-Merged-chr10-103523273-1
chr10	103602943	103603348	H12-Merged-chr10-103603145-1
chr10	103935669	103935843	H12-Merged-chr10-103935756-1
chr1	236294335	236294506	H12-Merged-chr1-236294420-1
chr1	236561837	236562006	H12-Merged-chr1-236561921-1
chr10	103939015	103939720	H12-Merged-chr10-103939367-1
chr10	103943931	103944449	H12-Merged-chr10-103944190-1
chr10	103946733	103948989	H12-Merged-chr10-103947861-1
chr10	103966530	103966771	H12-Merged-chr10-103966650-1
chr10	103972318	103972530	H12-Merged-chr10-103972424-1
chr1	236655094	236655306	H12-Merged-chr1-236655200-1
chr1	243272719	243272962	H12-Merged-chr1-243272840-1
chr10	104175892	104176673	H12-Merged-chr10-104176282-1
chr1	244022834	244023393	H12-Merged-chr1-244023113-1
chr1	244980174	244980897	H12-Merged-chr1-244980535-1
chr1	246875925	246876661	H12-Merged-chr1-246876293-1
chr1	246984083	246984793	H12-Merged-chr1-246984438-1
chr10	104599964	104600874	H12-Merged-chr10-104600419-1
chr10	104752052	104752560	H12-Merged-chr10-104752306-1
chr10	104778581	104778747	H12-Merged-chr10-104778664-1
chr10	104780992	104781280	H12-Merged-chr10-104781136-1
chr10	104813003	104813232	H12-Merged-chr10-104813117-1
chr1	246985477	246985825	H12-Merged-chr1-246985651-1
chr1	247271816	247272031	H12-Merged-chr1-247271923-1
chr1	249235362	249235552	H12-Merged-chr1-249235457-1
chr10	124589	124955	H12-Merged-chr10-124772-1
chr10	537038	537206	H12-Merged-chr10-537122-1
chr10	104824473	104824785	H12-Merged-chr10-104824629-1
chr10	105230171	105230604	H12-Merged-chr10-105230387-1
chr10	749833	750054	H12-Merged-chr10-749943-1
chr10	752917	753660	H12-Merged-chr10-753288-1
chr10	1187418	1187951	H12-Merged-chr10-1187684-1
chr10	3041487	3041882	H12-Merged-chr10-3041684-1
chr10	105259113	105260686	H12-Merged-chr10-105259899-1
chr10	105285198	105285364	H12-Merged-chr10-105285281-1
chr10	105298770	105299385	H12-Merged-chr10-105299077-1
chr10	105304461	105305005	H12-Merged-chr10-105304733-1
chr10	105310833	105311222	H12-Merged-chr10-105311027-1
chr10	3060633	3060825	H12-Merged-chr10-3060729-1
chr10	3218190	3218404	H12-Merged-chr10-3218297-1
chr10	3242180	3242456	H12-Merged-chr10-3242318-1
chr10	105340162	105341084	H12-Merged-chr10-105340623-1
chr10	105906697	105907487	H12-Merged-chr10-105907092-1
chr10	105924779	105925516	H12-Merged-chr10-105925147-1
chr10	105929667	105930377	H12-Merged-chr10-105930022-1
chr10	3319431	3319796	H12-Merged-chr10-3319613-1
chr10	3328220	3329255	H12-Merged-chr10-3328737-1
chr10	3344174	3344778	H12-Merged-chr10-3344476-1
chr10	3350625	3350844	H12-Merged-chr10-3350734-1
chr10	3431383	3432053	H12-Merged-chr10-3431718-1
chr4	55723193	55723359	H12-Merged-chr4-55723276-1
chr4	55724067	55724415	H12-Merged-chr4-55724241-1
chr4	55726099	55726957	H12-Merged-chr4-55726528-1
chr4	55733303	55733563	H12-Merged-chr4-55733433-1
chr4	55767419	55767603	H12-Merged-chr4-55767511-1
chr4	55769481	55769649	H12-Merged-chr4-55769565-1
chr4	55776948	55777114	H12-Merged-chr4-55777031-1
chr4	55783941	55784405	H12-Merged-chr4-55784173-1
chr4	56140111	56140469	H12-Merged-chr4-56140290-1
chr4	56445980	56446170	H12-Merged-chr4-56446075-1
chr4	56570700	56570872	H12-Merged-chr4-56570786-1
chr4	56657913	56658154	H12-Merged-chr4-56658033-1
chr4	56663873	56664102	H12-Merged-chr4-56663987-1
chr15	73960827	73961243	H12-Merged-chr15-73961035-1
chr4	56907141	56907721	H12-Merged-chr4-56907431-1
chr4	56908802	56909031	H12-Merged-chr4-56908916-1
chr15	74050362	74051143	H12-Merged-chr15-74050752-1
chr4	56933870	56934454	H12-Merged-chr4-56934162-1
chr15	74054471	74054733	H12-Merged-chr15-74054602-1
chr4	57380110	57380307	H12-Merged-chr4-57380208-1
chr4	57385675	57386371	H12-Merged-chr4-57386023-1
chr15	74056279	74056674	H12-Merged-chr15-74056476-1
chr15	74062218	74062429	H12-Merged-chr15-74062323-1
chr15	74063351	74064011	H12-Merged-chr15-74063681-1
chr15	74065182	74065512	H12-Merged-chr15-74065347-1
chr15	74097623	74098265	H12-Merged-chr15-74097944-1
chr4	57424242	57424435	H12-Merged-chr4-57424338-1
chr15	74133735	74134365	H12-Merged-chr15-74134050-1
chr15	74152634	74153047	H12-Merged-chr15-74152840-1
chr15	74157608	74158240	H12-Merged-chr15-74157924-1
chr4	57474720	57475902	H12-Merged-chr4-57475311-1
chr4	57477927	57478234	H12-Merged-chr4-57478080-1
chr15	74203311	74204291	H12-Merged-chr15-74203801-1
chr4	57483715	57484231	H12-Merged-chr4-57483973-1
chr4	57690400	57690591	H12-Merged-chr4-57690495-1
chr15	74208223	74208727	H12-Merged-chr15-74208475-1
chr15	74349232	74349701	H12-Merged-chr15-74349466-1
chr15	74377309	74377634	H12-Merged-chr15-74377471-1
chr4	58103277	58104035	H12-Merged-chr4-58103656-1
chr15	74407124	74407325	H12-Merged-chr15-74407224-1
chr4	58136671	58136900	H12-Merged-chr4-58136785-1
chr4	66591060	66591298	H12-Merged-chr4-66591179-1
chr4	69229137	69229839	H12-Merged-chr4-69229488-1
chr4	71442962	71443128	H12-Merged-chr4-71443045-1
chr15	74452707	74452873	H12-Merged-chr15-74452790-1
chr4	74215622	74215871	H12-Merged-chr4-74215746-1
chr4	74383852	74384440	H12-Merged-chr4-74384146-1
chr4	75716321	75716500	H12-Merged-chr4-75716410-1
chr4	75722831	75722997	H12-Merged-chr4-75722914-1
chr4	75815243	75815415	H12-Merged-chr4-75815329-1
chr15	74550606	74550828	H12-Merged-chr15-74550717-1
chr4	75861177	75861345	H12-Merged-chr4-75861261-1
chr15	74572256	74572422	H12-Merged-chr15-74572339-1
chr4	76789861	76790725	H12-Merged-chr4-76790293-1
chr15	74574070	74574728	H12-Merged-chr15-74574399-1
chr4	76977503	76977829	H12-Merged-chr4-76977666-1
chr15	74649642	74649808	H12-Merged-chr15-74649725-1
chr4	76980088	76980300	H12-Merged-chr4-76980194-1
chr15	74651839	74652112	H12-Merged-chr15-74651975-1
chr4	77150737	77151033	H12-Merged-chr4-77150885-1
chr4	77166704	77167380	H12-Merged-chr4-77167042-1
chr15	74695862	74696299	H12-Merged-chr15-74696080-1
chr15	74998297	74999396	H12-Merged-chr15-74998846-1
chr4	77180238	77180405	H12-Merged-chr4-77180321-1
chr4	77236215	77237001	H12-Merged-chr4-77236608-1
chr4	77260477	77260872	H12-Merged-chr4-77260674-1
chr15	75526280	75526722	H12-Merged-chr15-75526501-1
chr4	77291513	77291797	H12-Merged-chr4-77291655-1
chr4	77307852	77308445	H12-Merged-chr4-77308148-1
chr4	77309397	77309965	H12-Merged-chr4-77309681-1
chr15	75533077	75533254	H12-Merged-chr15-75533165-1
chr15	75548033	75548389	H12-Merged-chr15-75548211-1
chr4	77319029	77319757	H12-Merged-chr4-77319393-1
chr4	77325010	77325374	H12-Merged-chr4-77325192-1
chr15	75569222	75569736	H12-Merged-chr15-75569479-1
chr15	75570787	75570990	H12-Merged-chr15-75570888-1
chr15	75575957	75578276	H12-Merged-chr15-75577116-1
chr15	75599595	75600772	H12-Merged-chr15-75600183-1
chr15	75601447	75601618	H12-Merged-chr15-75601532-1
chr15	75603652	75603833	H12-Merged-chr15-75603742-1
chr15	75604510	75605615	H12-Merged-chr15-75605062-1
chr15	76008791	76010102	H12-Merged-chr15-76009446-1
chr15	76017451	76018209	H12-Merged-chr15-76017830-1
chr15	76019155	76020317	H12-Merged-chr15-76019736-1
chr1	25187662	25188442	H12-Merged-chr1-25188052-1
chr1	25195173	25195339	H12-Merged-chr1-25195256-1
chr1	25197457	25198037	H12-Merged-chr1-25197747-1
chr1	25411760	25412431	H12-Merged-chr1-25412095-1
chr1	25441265	25441819	H12-Merged-chr1-25441542-1
chr1	25466889	25467156	H12-Merged-chr1-25467022-1
chr1	25480206	25480511	H12-Merged-chr1-25480358-1
chr1	25484223	25484865	H12-Merged-chr1-25484544-1
chr1	25606342	25606599	H12-Merged-chr1-25606470-1
chr1	25618313	25618479	H12-Merged-chr1-25618396-1
chr1	25862914	25863963	H12-Merged-chr1-25863438-1
chr1	25925825	25926505	H12-Merged-chr1-25926165-1
chr1	25931269	25931633	H12-Merged-chr1-25931451-1
chr1	25935976	25936716	H12-Merged-chr1-25936346-1
chr1	25939279	25940421	H12-Merged-chr1-25939850-1
chr1	25950317	25950940	H12-Merged-chr1-25950628-1
chr1	25963373	25963574	H12-Merged-chr1-25963473-1
chr1	25971533	25972415	H12-Merged-chr1-25971974-1
chr1	25994255	25994863	H12-Merged-chr1-25994559-1
chr1	26061095	26061717	H12-Merged-chr1-26061406-1
chr1	26065252	26065684	H12-Merged-chr1-26065468-1
chr20	48112469	48113120	H12-Merged-chr20-48112794-1
chr20	48121475	48122185	H12-Merged-chr20-48121830-1
chr2	171277584	171278133	H12-Merged-chr2-171277858-1
chr2	171292678	171293006	H12-Merged-chr2-171292842-1
chr2	171417199	171417642	H12-Merged-chr2-171417420-1
chr2	171577114	171577304	H12-Merged-chr2-171577209-1
chr9	100310751	100311411	H12-Merged-chr9-100311081-1
chr2	171597300	171597742	H12-Merged-chr2-171597521-1
chr1	26068446	26069451	H12-Merged-chr1-26068948-1
chr1	26097924	26098417	H12-Merged-chr1-26098170-1
chr1	26111202	26111429	H12-Merged-chr1-26111315-1
chr1	26116449	26117241	H12-Merged-chr1-26116845-1
chr1	26377477	26377960	H12-Merged-chr1-26377718-1
chr20	48917044	48917587	H12-Merged-chr20-48917315-1
chr20	48933762	48934289	H12-Merged-chr20-48934025-1
chr20	48945142	48946273	H12-Merged-chr20-48945707-1
chr20	48949852	48951302	H12-Merged-chr20-48950577-1
chr20	48974533	48974736	H12-Merged-chr20-48974634-1
chr20	48975657	48977054	H12-Merged-chr20-48976355-1
chr20	48977726	48977983	H12-Merged-chr20-48977854-1
chr2	171629819	171630444	H12-Merged-chr2-171630131-1
chr2	171637852	171638092	H12-Merged-chr2-171637972-1
chr9	100352681	100353302	H12-Merged-chr9-100352991-1
chr2	171684754	171685510	H12-Merged-chr2-171685132-1
chr2	171686865	171687677	H12-Merged-chr2-171687271-1
chr9	100476651	100477039	H12-Merged-chr9-100476845-1
chr9	100479664	100480547	H12-Merged-chr9-100480105-1
chr2	171692731	171693279	H12-Merged-chr2-171693005-1
chr9	100482822	100483784	H12-Merged-chr9-100483303-1
chr2	171695823	171696086	H12-Merged-chr2-171695954-1
chr9	100490556	100490752	H12-Merged-chr9-100490654-1
chr2	171708265	171708572	H12-Merged-chr2-171708418-1
chr9	100496361	100496579	H12-Merged-chr9-100496470-1
chr2	171709255	171709898	H12-Merged-chr2-171709576-1
chr1	26411052	26411855	H12-Merged-chr1-26411453-1
chr1	26542544	26542765	H12-Merged-chr1-26542654-1
chr1	26654762	26655439	H12-Merged-chr1-26655100-1
chr1	26657353	26657580	H12-Merged-chr1-26657466-1
chr1	26668359	26668525	H12-Merged-chr1-26668442-1
chr1	26682502	26682834	H12-Merged-chr1-26682668-1
chr20	48986205	48986390	H12-Merged-chr20-48986297-1
chr20	49025682	49025886	H12-Merged-chr20-49025784-1
chr20	49027398	49027933	H12-Merged-chr20-49027665-1
chr20	49069829	49070038	H12-Merged-chr20-49069933-1
chr2	171715340	171715600	H12-Merged-chr2-171715470-1
chr2	171722664	171722936	H12-Merged-chr2-171722800-1
chr9	100517974	100518154	H12-Merged-chr9-100518064-1
chr2	171759118	171759516	H12-Merged-chr2-171759317-1
chr2	171762496	171763204	H12-Merged-chr2-171762850-1
chr9	100533858	100534321	H12-Merged-chr9-100534089-1
chr2	172426143	172426926	H12-Merged-chr2-172426534-1
chr2	172456226	172456493	H12-Merged-chr2-172456359-1
chr9	100557302	100557940	H12-Merged-chr9-100557621-1
chr1	26690765	26691409	H12-Merged-chr1-26691087-1
chr1	26848178	26848626	H12-Merged-chr1-26848402-1
chr1	26917793	26918232	H12-Merged-chr1-26918012-1
chr20	49310154	49311152	H12-Merged-chr20-49310653-1
chr20	49311926	49312274	H12-Merged-chr20-49312100-1
chr20	49319947	49320359	H12-Merged-chr20-49320153-1
chr20	49329563	49329774	H12-Merged-chr20-49329668-1
chr20	49341074	49341532	H12-Merged-chr20-49341303-1
chr2	172473090	172473445	H12-Merged-chr2-172473267-1
chr2	172475627	172475845	H12-Merged-chr2-172475736-1
chr2	172478570	172478789	H12-Merged-chr2-172478679-1
chr2	172510829	172512017	H12-Merged-chr2-172511423-1
chr2	172512946	172513141	H12-Merged-chr2-172513043-1
chr9	100588577	100588821	H12-Merged-chr9-100588699-1
chr2	172516173	172516339	H12-Merged-chr2-172516256-1
chr9	100604066	100604345	H12-Merged-chr9-100604205-1
chr2	172519233	172519778	H12-Merged-chr2-172519505-1
chr9	100605434	100606128	H12-Merged-chr9-100605781-1
chr2	172531722	172531888	H12-Merged-chr2-172531805-1
chr1	26937350	26937562	H12-Merged-chr1-26937456-1
chr1	27283767	27284093	H12-Merged-chr1-27283930-1
chr20	49392741	49393419	H12-Merged-chr20-49393080-1
chr20	49396403	49396650	H12-Merged-chr20-49396526-1
chr20	49593666	49595076	H12-Merged-chr20-49594371-1
chr20	49599086	49599571	H12-Merged-chr20-49599328-1
chr20	49623227	49623426	H12-Merged-chr20-49623326-1
chr20	49664556	49665524	H12-Merged-chr20-49665040-1
chr9	100649580	100649807	H12-Merged-chr9-100649693-1
chr2	172999744	173000018	H12-Merged-chr2-172999881-1
chr9	100686924	100687429	H12-Merged-chr9-100687176-1
chr2	173006322	173006918	H12-Merged-chr2-173006620-1
chr9	100690326	100690686	H12-Merged-chr9-100690506-1
chr2	173010757	173011088	H12-Merged-chr2-173010922-1
chr2	173017991	173018764	H12-Merged-chr2-173018377-1
chr1	27936947	27937266	H12-Merged-chr1-27937106-1
chr1	28582650	28582882	H12-Merged-chr1-28582766-1
chr1	29123254	29124164	H12-Merged-chr1-29123709-1
chr1	29130178	29130553	H12-Merged-chr1-29130365-1
chr20	49699644	49700636	H12-Merged-chr20-49700140-1
chr20	49713902	49714515	H12-Merged-chr20-49714208-1
chr20	49738426	49739420	H12-Merged-chr20-49738923-1
chr9	100726084	100727741	H12-Merged-chr9-100726912-1
chr9	100729095	100730074	H12-Merged-chr9-100729584-1
chr9	100734652	100735730	H12-Merged-chr9-100735191-1
chr1	830730	831159	H12-Merged-chr1-830944-1
chr2	174263331	174264262	H12-Merged-chr2-174263796-1
chr9	101475628	101476041	H12-Merged-chr9-101475834-1
chr9	101477189	101479854	H12-Merged-chr9-101478521-1
chr9	101480641	101481448	H12-Merged-chr9-101481044-1
chr20	49768708	49768918	H12-Merged-chr20-49768813-1
chr20	49777384	49778084	H12-Merged-chr20-49777734-1
chr20	49791132	49791485	H12-Merged-chr20-49791308-1
chr20	49797973	49798155	H12-Merged-chr20-49798064-1
chr2	174274593	174275143	H12-Merged-chr2-174274868-1
chr2	174287596	174287806	H12-Merged-chr2-174287701-1
chr2	174304053	174304245	H12-Merged-chr2-174304149-1
chr9	101619512	101619725	H12-Merged-chr9-101619618-1
chr1	918497	918708	H12-Merged-chr1-918602-1
chr2	174327647	174327940	H12-Merged-chr2-174327793-1
chr2	174329853	174330187	H12-Merged-chr2-174330020-1
chr1	993591	994349	H12-Merged-chr1-993970-1
chr1	1053467	1055169	H12-Merged-chr1-1054318-1
chr20	49835668	49835904	H12-Merged-chr20-49835786-1
chr20	49852537	49853598	H12-Merged-chr20-49853067-1
chr20	49861212	49861663	H12-Merged-chr20-49861437-1
chr20	49869629	49871411	H12-Merged-chr20-49870520-1
chr20	49872334	49872819	H12-Merged-chr20-49872576-1
chr20	49877233	49877402	H12-Merged-chr20-49877317-1
chr2	174372669	174372907	H12-Merged-chr2-174372788-1
chr2	174389750	174389917	H12-Merged-chr2-174389833-1
chr9	101652832	101653125	H12-Merged-chr9-101652978-1
chr9	101653887	101654053	H12-Merged-chr9-101653970-1
chr1	1076995	1077441	H12-Merged-chr1-1077218-1
chr2	174431097	174431290	H12-Merged-chr2-174431193-1
chr9	101658158	101659025	H12-Merged-chr9-101658591-1
chr2	174472522	174473300	H12-Merged-chr2-174472911-1
chr2	174482252	174482888	H12-Merged-chr2-174482570-1
chr9	101663453	101664258	H12-Merged-chr9-101663855-1
chr1	1130457	1131285	H12-Merged-chr1-1130871-1
chr2	174529054	174529986	H12-Merged-chr2-174529520-1
chr9	101665375	101665783	H12-Merged-chr9-101665579-1
chr2	174545549	174546554	H12-Merged-chr2-174546051-1
chr2	174584803	174585539	H12-Merged-chr2-174585171-1
chr9	101679051	101679261	H12-Merged-chr9-101679156-1
chr20	49878373	49878834	H12-Merged-chr20-49878603-1
chr20	49890161	49890466	H12-Merged-chr20-49890313-1
chr20	49896417	49897141	H12-Merged-chr20-49896779-1
chr20	49916617	49916783	H12-Merged-chr20-49916700-1
chr20	49921077	49921372	H12-Merged-chr20-49921224-1
chr20	50414898	50415311	H12-Merged-chr20-50415104-1
chr2	174597224	174597953	H12-Merged-chr2-174597588-1
chr9	101683521	101683861	H12-Merged-chr9-101683691-1
chr2	174648699	174649124	H12-Merged-chr2-174648911-1
chr9	101690002	101690193	H12-Merged-chr9-101690097-1
chr1	1372529	1372792	H12-Merged-chr1-1372660-1
chr2	174679010	174679631	H12-Merged-chr2-174679320-1
chr9	101691906	101692586	H12-Merged-chr9-101692246-1
chr9	101698438	101698786	H12-Merged-chr9-101698612-1
chr1	1530817	1532755	H12-Merged-chr1-1531786-1
chr2	174693068	174693535	H12-Merged-chr2-174693301-1
chr2	174698584	174699336	H12-Merged-chr2-174698960-1
chr9	101702694	101703542	H12-Merged-chr9-101703118-1
chr2	174728089	174728482	H12-Merged-chr2-174728285-1
chr9	101709931	101710605	H12-Merged-chr9-101710268-1
chr2	174735064	174735885	H12-Merged-chr2-174735474-1
chr1	1892932	1893351	H12-Merged-chr1-1893141-1
chr20	51684397	51684599	H12-Merged-chr20-51684498-1
chr20	52579811	52580019	H12-Merged-chr20-52579915-1
chr20	52786640	52787048	H12-Merged-chr20-52786844-1
chr20	52884989	52885702	H12-Merged-chr20-52885345-1
chr20	52889579	52890037	H12-Merged-chr20-52889808-1
chr20	54922794	54923553	H12-Merged-chr20-54923173-1
chr2	174741666	174741965	H12-Merged-chr2-174741815-1
chr9	101723969	101725535	H12-Merged-chr9-101724752-1
chr2	174744259	174744595	H12-Merged-chr2-174744427-1
chr9	101730658	101731204	H12-Merged-chr9-101730931-1
chr2	174747738	174748086	H12-Merged-chr2-174747912-1
chr2	174754226	174754430	H12-Merged-chr2-174754328-1
chr9	101737618	101738034	H12-Merged-chr9-101737826-1
chr9	101739128	101740239	H12-Merged-chr9-101739683-1
chr2	174856205	174856438	H12-Merged-chr2-174856321-1
chr9	101756253	101756805	H12-Merged-chr9-101756529-1
chr1	2395031	2395559	H12-Merged-chr1-2395295-1
chr2	174858204	174858440	H12-Merged-chr2-174858322-1
chr9	101757617	101757863	H12-Merged-chr9-101757740-1
chr9	101827493	101827876	H12-Merged-chr9-101827684-1
chr1	2472546	2472712	H12-Merged-chr1-2472629-1
chr2	174915837	174917250	H12-Merged-chr2-174916543-1
chr1	2504716	2505520	H12-Merged-chr1-2505118-1
chr1	2557430	2557918	H12-Merged-chr1-2557674-1
chr13	27985023	27985218	H12-Merged-chr13-27985120-1
chr13	27987627	27987991	H12-Merged-chr13-27987809-1
chr13	27992096	27992426	H12-Merged-chr13-27992261-1
chr13	28044278	28044474	H12-Merged-chr13-28044376-1
chr1	2992557	2992725	H12-Merged-chr1-2992641-1
chr11	128757138	128757347	H12-Merged-chr11-128757242-1
chr1	3313917	3314325	H12-Merged-chr1-3314121-1
chr11	128796368	128796573	H12-Merged-chr11-128796470-1
chr13	28259692	28259859	H12-Merged-chr13-28259775-1
chr13	28302600	28302863	H12-Merged-chr13-28302731-1
chr13	28355925	28356470	H12-Merged-chr13-28356197-1
chr1	3357466	3358024	H12-Merged-chr1-3357745-1
chr1	3359900	3360066	H12-Merged-chr1-3359983-1
chr1	3624261	3624597	H12-Merged-chr1-3624429-1
chr1	3648755	3649329	H12-Merged-chr1-3649042-1
chr11	128799536	128800015	H12-Merged-chr11-128799775-1
chr1	3666276	3667372	H12-Merged-chr1-3666824-1
chr11	128820282	128821076	H12-Merged-chr11-128820679-1
chr1	6085666	6086054	H12-Merged-chr1-6085860-1
chr1	6208158	6208470	H12-Merged-chr1-6208314-1
chr11	129158695	129159013	H12-Merged-chr11-129158854-1
chr11	129166972	129167815	H12-Merged-chr11-129167393-1
chr13	28405597	28405933	H12-Merged-chr13-28405765-1
chr13	28433678	28435558	H12-Merged-chr13-28434618-1
chr13	28453458	28453624	H12-Merged-chr13-28453541-1
chr13	28461823	28462177	H12-Merged-chr13-28462000-1
chr11	129252442	129252718	H12-Merged-chr11-129252580-1
chr11	129648792	129649057	H12-Merged-chr11-129648924-1
chr1	6629094	6629772	H12-Merged-chr1-6629433-1
chr11	129662080	129662402	H12-Merged-chr11-129662241-1
chr11	129672173	129672391	H12-Merged-chr11-129672282-1
chr13	28575218	28575438	H12-Merged-chr13-28575328-1
chr13	28600671	28600989	H12-Merged-chr13-28600830-1
chr13	28603400	28604094	H12-Merged-chr13-28603747-1
chr13	28607109	28607777	H12-Merged-chr13-28607443-1
chr13	28616068	28617163	H12-Merged-chr13-28616615-1
chr1	6809616	6809919	H12-Merged-chr1-6809767-1
chr1	6813943	6814203	H12-Merged-chr1-6814073-1
chr11	130053846	130054012	H12-Merged-chr11-130053929-1
chr1	6972838	6973521	H12-Merged-chr1-6973179-1
chr11	130270374	130270575	H12-Merged-chr11-130270474-1
chr11	130271738	130271904	H12-Merged-chr11-130271821-1
chr1	7686444	7686611	H12-Merged-chr1-7686527-1
chr11	130288443	130289038	H12-Merged-chr11-130288740-1
chr1	7752495	7752850	H12-Merged-chr1-7752672-1
chr11	130311192	130311827	H12-Merged-chr11-130311509-1
chr11	130322947	130323509	H12-Merged-chr11-130323228-1
chr13	28682632	28682798	H12-Merged-chr13-28682715-1
chr13	29267564	29267797	H12-Merged-chr13-29267680-1
chr13	29315314	29315792	H12-Merged-chr13-29315553-1
chr13	29335355	29335563	H12-Merged-chr13-29335459-1
chr13	29336845	29337372	H12-Merged-chr13-29337108-1
chr11	130340291	130340685	H12-Merged-chr11-130340488-1
chr11	130341937	130342201	H12-Merged-chr11-130342069-1
chr11	130348371	130349326	H12-Merged-chr11-130348848-1
chr11	130358467	130358651	H12-Merged-chr11-130358559-1
chr11	130630931	130631810	H12-Merged-chr11-130631370-1
chr13	29372190	29373423	H12-Merged-chr13-29372806-1
chr13	29389372	29389986	H12-Merged-chr13-29389679-1
chr11	130690831	130691135	H12-Merged-chr11-130690983-1
chr11	131596758	131597009	H12-Merged-chr11-131596883-1
chr11	131691241	131691657	H12-Merged-chr11-131691449-1
chr13	30008414	30008996	H12-Merged-chr13-30008705-1
chr13	30053758	30054231	H12-Merged-chr13-30053994-1
chr13	30176290	30176570	H12-Merged-chr13-30176430-1
chr13	30187366	30187996	H12-Merged-chr13-30187681-1
chr13	30199781	30200096	H12-Merged-chr13-30199938-1
chr13	30210221	30210644	H12-Merged-chr13-30210432-1
chr11	133880657	133881328	H12-Merged-chr11-133880992-1
chr11	133910921	133911380	H12-Merged-chr11-133911150-1
chr11	134152154	134152670	H12-Merged-chr11-134152412-1
chr13	30239485	30239651	H12-Merged-chr13-30239568-1
chr13	30303261	30303792	H12-Merged-chr13-30303526-1
chr13	30305613	30306748	H12-Merged-chr13-30306180-1
chr13	30318870	30319036	H12-Merged-chr13-30318953-1
chr13	30443443	30444771	H12-Merged-chr13-30444107-1
chr11	134214392	134214558	H12-Merged-chr11-134214475-1
chr12	61036	61340	H12-Merged-chr12-61188-1
chr13	30445504	30445972	H12-Merged-chr13-30445738-1
chr13	30449203	30449589	H12-Merged-chr13-30449396-1
chr13	30451628	30452069	H12-Merged-chr13-30451848-1
chr13	30509074	30509556	H12-Merged-chr13-30509315-1
chr13	30516124	30516561	H12-Merged-chr13-30516342-1
chr13	30578144	30578673	H12-Merged-chr13-30578408-1
chr12	164126	164421	H12-Merged-chr12-164273-1
chr12	218444	218828	H12-Merged-chr12-218636-1
chr13	30698210	30698920	H12-Merged-chr13-30698565-1
chr13	30701045	30701848	H12-Merged-chr13-30701446-1
chr13	30744795	30745064	H12-Merged-chr13-30744929-1
chr13	30966347	30966584	H12-Merged-chr13-30966465-1
chr13	31459945	31460673	H12-Merged-chr13-31460309-1
chr12	298986	299576	H12-Merged-chr12-299281-1
chr12	335739	335987	H12-Merged-chr12-335863-1
chr12	362870	363317	H12-Merged-chr12-363093-1
chr12	366463	367023	H12-Merged-chr12-366743-1
chr6	168211798	168212245	H12-Merged-chr6-168212021-1
chr6	168423703	168423869	H12-Merged-chr6-168423786-1
chr6	168438042	168438808	H12-Merged-chr6-168438425-1
chr6	170196459	170196817	H12-Merged-chr6-170196638-1
chr6	170223058	170223629	H12-Merged-chr6-170223343-1
chr6	170270964	170271266	H12-Merged-chr6-170271115-1
chr6	170533102	170533268	H12-Merged-chr6-170533185-1
chr6	170817251	170817956	H12-Merged-chr6-170817603-1
chr6	170821039	170821802	H12-Merged-chr6-170821420-1
chr19	42651625	42652204	H12-Merged-chr19-42651914-1
chr6	170941064	170941546	H12-Merged-chr6-170941305-1
chr19	42668940	42669431	H12-Merged-chr19-42669185-1
chr7	131430	131767	H12-Merged-chr7-131598-1
chr7	137393	137678	H12-Merged-chr7-137535-1
chr17	61612137	61612794	H12-Merged-chr17-61612465-1
chr6	27819065	27819577	H12-Merged-chr6-27819321-1
chr17	61949024	61950770	H12-Merged-chr17-61949897-1
chr17	61953162	61953520	H12-Merged-chr17-61953341-1
chr6	28145873	28146139	H12-Merged-chr6-28146006-1
chr17	61954239	61954943	H12-Merged-chr17-61954591-1
chr19	42887060	42887424	H12-Merged-chr19-42887242-1
chr7	178009	178344	H12-Merged-chr7-178176-1
chr7	315312	317507	H12-Merged-chr7-316409-1
chr19	42970457	42970623	H12-Merged-chr19-42970540-1
chr7	348323	348495	H12-Merged-chr7-348409-1
chr7	352908	353144	H12-Merged-chr7-353026-1
chr7	354095	354685	H12-Merged-chr7-354390-1
chr17	61968007	61968193	H12-Merged-chr17-61968100-1
chr17	61975769	61976066	H12-Merged-chr17-61975917-1
chr17	61977489	61978235	H12-Merged-chr17-61977862-1
chr17	61978991	61980255	H12-Merged-chr17-61979623-1
chr6	28429330	28429509	H12-Merged-chr6-28429419-1
chr17	61993388	61994136	H12-Merged-chr17-61993762-1
chr6	28506794	28507011	H12-Merged-chr6-28506902-1
chr17	63063076	63063342	H12-Merged-chr17-63063209-1
chr6	28568116	28568332	H12-Merged-chr6-28568224-1
chr19	44296962	44297792	H12-Merged-chr19-44297377-1
chr7	357509	357811	H12-Merged-chr7-357660-1
chr19	44306955	44307557	H12-Merged-chr19-44307256-1
chr19	44311930	44312533	H12-Merged-chr19-44312231-1
chr7	436757	437212	H12-Merged-chr7-436984-1
chr19	44326448	44326616	H12-Merged-chr19-44326532-1
chr7	439920	440086	H12-Merged-chr7-440003-1
chr17	63078585	63078903	H12-Merged-chr17-63078744-1
chr17	63080523	63080763	H12-Merged-chr17-63080643-1
chr17	63099094	63099873	H12-Merged-chr17-63099483-1
chr6	28605209	28605375	H12-Merged-chr6-28605292-1
chr17	63105933	63106230	H12-Merged-chr17-63106081-1
chr17	63115090	63115423	H12-Merged-chr17-63115256-1
chr6	28626738	28627109	H12-Merged-chr6-28626923-1
chr6	28640765	28640931	H12-Merged-chr6-28640848-1
chr19	45010781	45011146	H12-Merged-chr19-45010963-1
chr19	45047813	45048129	H12-Merged-chr19-45047971-1
chr19	45065275	45065907	H12-Merged-chr19-45065591-1
chr19	45068402	45068615	H12-Merged-chr19-45068508-1
chr19	45330122	45330499	H12-Merged-chr19-45330310-1
chr7	982030	982203	H12-Merged-chr7-982116-1
chr19	45334467	45335118	H12-Merged-chr19-45334792-1
chr7	998426	998752	H12-Merged-chr7-998589-1
chr7	1003659	1003825	H12-Merged-chr7-1003742-1
chr17	63127075	63127619	H12-Merged-chr17-63127347-1
chr17	63143223	63143401	H12-Merged-chr17-63143312-1
chr17	63146160	63147040	H12-Merged-chr17-63146600-1
chr17	63147931	63148887	H12-Merged-chr17-63148409-1
chr6	28759946	28760125	H12-Merged-chr6-28760035-1
chr19	45826491	45828007	H12-Merged-chr19-45827249-1
chr7	1259469	1260004	H12-Merged-chr7-1259736-1
chr19	46245936	46246362	H12-Merged-chr19-46246149-1
chr7	1412404	1412895	H12-Merged-chr7-1412649-1
chr6	28763765	28763972	H12-Merged-chr6-28763868-1
chr17	63247547	63247891	H12-Merged-chr17-63247719-1
chr6	28768490	28768918	H12-Merged-chr6-28768704-1
chr17	63303675	63303975	H12-Merged-chr17-63303825-1
chr17	63306932	63307935	H12-Merged-chr17-63307433-1
chr6	28773203	28773537	H12-Merged-chr6-28773370-1
chr6	28774288	28775037	H12-Merged-chr6-28774662-1
chr6	28786505	28787125	H12-Merged-chr6-28786815-1
chr19	46379746	46379920	H12-Merged-chr19-46379833-1
chr19	46414604	46414770	H12-Merged-chr19-46414687-1
chr7	1431239	1431440	H12-Merged-chr7-1431339-1
chr19	46422061	46422881	H12-Merged-chr19-46422471-1
chr7	1448101	1448726	H12-Merged-chr7-1448413-1
chr19	46534466	46534635	H12-Merged-chr19-46534550-1
chr7	1626851	1627173	H12-Merged-chr7-1627012-1
chr7	1695578	1696544	H12-Merged-chr7-1696061-1
chr17	63311771	63311937	H12-Merged-chr17-63311854-1
chr17	63364448	63364614	H12-Merged-chr17-63364531-1
chr17	63366701	63367469	H12-Merged-chr17-63367085-1
chr6	28975238	28975413	H12-Merged-chr6-28975325-1
chr17	63374576	63375101	H12-Merged-chr17-63374838-1
chr17	63402415	63402581	H12-Merged-chr17-63402498-1
chr6	29635082	29636412	H12-Merged-chr6-29635747-1
chr6	29638650	29639010	H12-Merged-chr6-29638830-1
chr6	29653030	29654159	H12-Merged-chr6-29653594-1
chr19	46539272	46539747	H12-Merged-chr19-46539509-1
chr19	46543420	46544291	H12-Merged-chr19-46543855-1
chr19	46554518	46554773	H12-Merged-chr19-46554645-1
chr19	46558337	46558651	H12-Merged-chr19-46558494-1
chr7	2706327	2707064	H12-Merged-chr7-2706695-1
chr17	63406673	63406874	H12-Merged-chr17-63406773-1
chr17	63420386	63420859	H12-Merged-chr17-63420622-1
chr17	63432081	63433209	H12-Merged-chr17-63432645-1
chr17	63438569	63439433	H12-Merged-chr17-63439001-1
chr6	29672290	29672461	H12-Merged-chr6-29672375-1
chr17	63446798	63447163	H12-Merged-chr17-63446980-1
chr17	63471817	63472438	H12-Merged-chr17-63472127-1
chr6	29689278	29689472	H12-Merged-chr6-29689375-1
chr6	29697938	29698591	H12-Merged-chr6-29698264-1
chr19	46564789	46565980	H12-Merged-chr19-46565384-1
chr7	3155301	3155527	H12-Merged-chr7-3155414-1
chr7	3256580	3256960	H12-Merged-chr7-3256770-1
chr19	46607432	46607810	H12-Merged-chr19-46607621-1
chr19	46612846	46613583	H12-Merged-chr19-46613214-1
chr7	4911023	4911322	H12-Merged-chr7-4911172-1
chr7	5004514	5004721	H12-Merged-chr7-5004617-1
chr17	63478695	63478865	H12-Merged-chr17-63478780-1
chr17	63492882	63493606	H12-Merged-chr17-63493244-1
chr6	29746114	29746810	H12-Merged-chr6-29746462-1
chr17	64211478	64211825	H12-Merged-chr17-64211651-1
chr17	64215733	64216436	H12-Merged-chr17-64216084-1
chr17	64827492	64828081	H12-Merged-chr17-64827786-1
chr6	29773243	29774049	H12-Merged-chr6-29773646-1
chr6	29791685	29791907	H12-Merged-chr6-29791796-1
chr19	46621049	46621236	H12-Merged-chr19-46621142-1
chr19	46648612	46648831	H12-Merged-chr19-46648721-1
chr17	64849141	64849320	H12-Merged-chr17-64849230-1
chr17	64915867	64916083	H12-Merged-chr17-64915975-1
chr17	64922137	64922469	H12-Merged-chr17-64922303-1
chr17	64956109	64957297	H12-Merged-chr17-64956703-1
chr19	46679862	46680187	H12-Merged-chr19-46680024-1
chr19	46684894	46685918	H12-Merged-chr19-46685406-1
chr19	46693570	46694272	H12-Merged-chr19-46693921-1
chr19	46695362	46696387	H12-Merged-chr19-46695874-1
chr19	46697723	46699106	H12-Merged-chr19-46698414-1
chr19	46700336	46700850	H12-Merged-chr19-46700593-1
chr17	64985558	64986457	H12-Merged-chr17-64986007-1
chr17	65005491	65006248	H12-Merged-chr17-65005869-1
chr17	65042599	65042812	H12-Merged-chr17-65042705-1
chr17	66090731	66091030	H12-Merged-chr17-66090880-1
chr10	105939223	105939464	H12-Merged-chr10-105939343-1
chr10	105940418	105940802	H12-Merged-chr10-105940610-1
chr10	105974660	105977455	H12-Merged-chr10-105976057-1
chr10	105979931	105980252	H12-Merged-chr10-105980091-1
chr10	105998619	105999248	H12-Merged-chr10-105998933-1
chr10	3624149	3624680	H12-Merged-chr10-3624414-1
chr10	3625842	3626401	H12-Merged-chr10-3626121-1
chr10	3631110	3631717	H12-Merged-chr10-3631413-1
chr10	3634056	3634222	H12-Merged-chr10-3634139-1
chr10	3690736	3691060	H12-Merged-chr10-3690898-1
chr10	5026091	5026584	H12-Merged-chr10-5026337-1
chr10	5402343	5402524	H12-Merged-chr10-5402433-1
chr10	106037095	106037429	H12-Merged-chr10-106037262-1
chr10	106042525	106043168	H12-Merged-chr10-106042846-1
chr10	5676017	5676288	H12-Merged-chr10-5676152-1
chr10	6090835	6091567	H12-Merged-chr10-6091201-1
chr10	6102231	6102642	H12-Merged-chr10-6102436-1
chr10	6108510	6109100	H12-Merged-chr10-6108805-1
chr10	6113492	6114256	H12-Merged-chr10-6113874-1
chr10	112375276	112375769	H12-Merged-chr10-112375522-1
chr10	112385223	112385621	H12-Merged-chr10-112385422-1
chr10	112387013	112387231	H12-Merged-chr10-112387122-1
chr10	6449471	6449637	H12-Merged-chr10-6449554-1
chr10	6722611	6723294	H12-Merged-chr10-6722952-1
chr10	6776257	6777006	H12-Merged-chr10-6776631-1
chr10	112409697	112410510	H12-Merged-chr10-112410103-1
chr10	112426194	112426414	H12-Merged-chr10-112426304-1
chr10	112453806	112453990	H12-Merged-chr10-112453898-1
chr10	112477383	112477880	H12-Merged-chr10-112477631-1
chr10	8256741	8256907	H12-Merged-chr10-8256824-1
chr10	8354648	8355289	H12-Merged-chr10-8354968-1
chr10	8371820	8372778	H12-Merged-chr10-8372299-1
chr10	112490413	112490755	H12-Merged-chr10-112490584-1
chr10	112499416	112499750	H12-Merged-chr10-112499583-1
chr10	112537403	112539416	H12-Merged-chr10-112538409-1
chr10	112554672	112555658	H12-Merged-chr10-112555165-1
chr10	112569350	112570153	H12-Merged-chr10-112569751-1
chr10	112587768	112588188	H12-Merged-chr10-112587978-1
chr10	112590680	112591203	H12-Merged-chr10-112590941-1
chr10	112625222	112626064	H12-Merged-chr10-112625643-1
chr10	8375151	8375721	H12-Merged-chr10-8375436-1
chr10	8480918	8481831	H12-Merged-chr10-8481374-1
chr10	8486373	8486833	H12-Merged-chr10-8486603-1
chr10	11451541	11452325	H12-Merged-chr10-11451933-1
chr10	11477406	11477831	H12-Merged-chr10-11477618-1
chr10	11481588	11482011	H12-Merged-chr10-11481799-1
chr10	112833205	112833995	H12-Merged-chr10-112833600-1
chr10	114620632	114621111	H12-Merged-chr10-114620871-1
chr10	114654163	114655305	H12-Merged-chr10-114654734-1
chr10	114988637	114988803	H12-Merged-chr10-114988720-1
chr10	115098305	115098977	H12-Merged-chr10-115098641-1
chr10	115113653	115114465	H12-Merged-chr10-115114059-1
chr10	115149679	115150416	H12-Merged-chr10-115150047-1
chr10	11733253	11733653	H12-Merged-chr10-11733453-1
chr10	11751815	11752110	H12-Merged-chr10-11751962-1
chr10	11754487	11755248	H12-Merged-chr10-11754867-1
chr10	11756120	11756290	H12-Merged-chr10-11756205-1
chr10	115379739	115380436	H12-Merged-chr10-115380087-1
chr10	115404650	115405607	H12-Merged-chr10-115405128-1
chr10	115430288	115431077	H12-Merged-chr10-115430682-1
chr10	115529340	115529600	H12-Merged-chr10-115529470-1
chr10	115535034	115535819	H12-Merged-chr10-115535426-1
chr10	11832720	11833366	H12-Merged-chr10-11833043-1
chr10	12106971	12107202	H12-Merged-chr10-12107086-1
chr10	12933685	12934203	H12-Merged-chr10-12933944-1
chr10	115994673	115995066	H12-Merged-chr10-115994869-1
chr10	116001896	116002756	H12-Merged-chr10-116002326-1
chr10	116003614	116004038	H12-Merged-chr10-116003826-1
chr10	116038367	116038702	H12-Merged-chr10-116038534-1
chr10	13434605	13435480	H12-Merged-chr10-13435042-1
chr10	13440701	13441347	H12-Merged-chr10-13441024-1
chr10	13452037	13453227	H12-Merged-chr10-13452632-1
chr10	116093818	116094642	H12-Merged-chr10-116094230-1
chr10	116116950	116117199	H12-Merged-chr10-116117074-1
chr10	13454710	13455099	H12-Merged-chr10-13454904-1
chr10	13458531	13459308	H12-Merged-chr10-13458919-1
chr10	13466594	13467464	H12-Merged-chr10-13467029-1
chr10	13582142	13582931	H12-Merged-chr10-13582536-1
chr10	116521195	116521917	H12-Merged-chr10-116521556-1
chr10	118854559	118854750	H12-Merged-chr10-118854654-1
chr10	118906767	118907491	H12-Merged-chr10-118907129-1
chr10	13613580	13613877	H12-Merged-chr10-13613728-1
chr10	14148960	14149218	H12-Merged-chr10-14149089-1
chr10	14151797	14151991	H12-Merged-chr10-14151894-1
chr10	14175437	14175684	H12-Merged-chr10-14175560-1
chr4	77405937	77406853	H12-Merged-chr4-77406395-1
chr4	77424690	77425514	H12-Merged-chr4-77425102-1
chr4	77448584	77449104	H12-Merged-chr4-77448844-1
chr4	77831060	77831703	H12-Merged-chr4-77831381-1
chr3	122734681	122735142	H12-Merged-chr3-122734911-1
chr3	123056829	123057097	H12-Merged-chr3-123056963-1
chr3	123077082	123077951	H12-Merged-chr3-123077516-1
chr3	123079075	123079313	H12-Merged-chr3-123079194-1
chr4	78033957	78034485	H12-Merged-chr4-78034221-1
chr4	78046154	78046375	H12-Merged-chr4-78046264-1
chr4	78047249	78047510	H12-Merged-chr4-78047379-1
chr3	123090370	123091178	H12-Merged-chr3-123090774-1
chr3	123093189	123093531	H12-Merged-chr3-123093360-1
chr3	123104844	123105814	H12-Merged-chr3-123105329-1
chr3	123134978	123135744	H12-Merged-chr3-123135361-1
chr3	123148589	123149289	H12-Merged-chr3-123148939-1
chr3	123156923	123157417	H12-Merged-chr3-123157170-1
chr15	76062023	76062817	H12-Merged-chr15-76062420-1
chr4	78110107	78110616	H12-Merged-chr4-78110361-1
chr14	56342622	56343190	H12-Merged-chr14-56342906-1
chr14	56535006	56535172	H12-Merged-chr14-56535089-1
chr3	123170656	123171687	H12-Merged-chr3-123171171-1
chr14	56566492	56567072	H12-Merged-chr14-56566782-1
chr3	123176149	123176946	H12-Merged-chr3-123176547-1
chr3	123186625	123186877	H12-Merged-chr3-123186751-1
chr3	123194935	123195368	H12-Merged-chr3-123195151-1
chr15	76094931	76095511	H12-Merged-chr15-76095221-1
chr15	76246048	76246219	H12-Merged-chr15-76246133-1
chr15	76252805	76253087	H12-Merged-chr15-76252946-1
chr4	78138369	78138947	H12-Merged-chr4-78138658-1
chr4	78143095	78143401	H12-Merged-chr4-78143248-1
chr4	78149441	78149628	H12-Merged-chr4-78149534-1
chr4	78335794	78335960	H12-Merged-chr4-78335877-1
chr4	78525206	78526653	H12-Merged-chr4-78525929-1
chr14	56633551	56633743	H12-Merged-chr14-56633647-1
chr14	56791415	56791604	H12-Merged-chr14-56791509-1
chr3	123430804	123432028	H12-Merged-chr3-123431416-1
chr14	56992197	56993496	H12-Merged-chr14-56992846-1
chr3	123433088	123433579	H12-Merged-chr3-123433333-1
chr3	123605262	123605485	H12-Merged-chr3-123605373-1
chr3	123685076	123685904	H12-Merged-chr3-123685490-1
chr15	76291765	76292391	H12-Merged-chr15-76292078-1
chr15	76330386	76331113	H12-Merged-chr15-76330749-1
chr15	76332153	76332422	H12-Merged-chr15-76332287-1
chr15	76408002	76408944	H12-Merged-chr15-76408473-1
chr4	79944959	79945182	H12-Merged-chr4-79945070-1
chr15	76414393	76414572	H12-Merged-chr15-76414482-1
chr4	81139017	81139271	H12-Merged-chr4-81139144-1
chr4	81140267	81141013	H12-Merged-chr4-81140640-1
chr14	58523330	58523496	H12-Merged-chr14-58523413-1
chr14	58538632	58539266	H12-Merged-chr14-58538949-1
chr14	58621261	58621490	H12-Merged-chr14-58621375-1
chr3	123721636	123723143	H12-Merged-chr3-123722389-1
chr15	76438114	76438349	H12-Merged-chr15-76438231-1
chr15	76446170	76446803	H12-Merged-chr15-76446486-1
chr4	81253114	81254328	H12-Merged-chr4-81253721-1
chr4	81280964	81281544	H12-Merged-chr4-81281254-1
chr4	81328478	81328691	H12-Merged-chr4-81328584-1
chr14	58664236	58664489	H12-Merged-chr14-58664362-1
chr3	123724129	123725009	H12-Merged-chr3-123724569-1
chr14	59545901	59546629	H12-Merged-chr14-59546265-1
chr3	123744131	123744792	H12-Merged-chr3-123744461-1
chr14	60037354	60037545	H12-Merged-chr14-60037449-1
chr3	123747638	123747992	H12-Merged-chr3-123747815-1
chr15	77212714	77213016	H12-Merged-chr15-77212865-1
chr15	77256130	77256315	H12-Merged-chr15-77256222-1
chr15	77300310	77300538	H12-Merged-chr15-77300424-1
chr15	77855216	77855978	H12-Merged-chr15-77855597-1
chr15	77866303	77866511	H12-Merged-chr15-77866407-1
chr4	83534417	83534627	H12-Merged-chr4-83534522-1
chr14	60057379	60057626	H12-Merged-chr14-60057502-1
chr14	60094058	60094961	H12-Merged-chr14-60094509-1
chr3	124002684	124003199	H12-Merged-chr3-124002941-1
chr3	124009938	124010592	H12-Merged-chr3-124010265-1
chr14	60177128	60178060	H12-Merged-chr14-60177594-1
chr3	124014189	124014421	H12-Merged-chr3-124014305-1
chr14	60211076	60211507	H12-Merged-chr14-60211291-1
chr3	124017740	124017929	H12-Merged-chr3-124017834-1
chr14	60221574	60222308	H12-Merged-chr14-60221941-1
chr3	124237308	124237474	H12-Merged-chr3-124237391-1
chr15	77876752	77877082	H12-Merged-chr15-77876917-1
chr15	77914263	77914857	H12-Merged-chr15-77914560-1
chr15	77920106	77920621	H12-Merged-chr15-77920363-1
chr15	77940768	77941201	H12-Merged-chr15-77940984-1
chr4	85475667	85475938	H12-Merged-chr4-85475802-1
chr4	85488675	85488841	H12-Merged-chr4-85488758-1
chr15	77960728	77961088	H12-Merged-chr15-77960908-1
chr4	85524431	85524604	H12-Merged-chr4-85524517-1
chr4	85979707	85980459	H12-Merged-chr4-85980083-1
chr4	86095436	86095617	H12-Merged-chr4-86095526-1
chr14	60303368	60303534	H12-Merged-chr14-60303451-1
chr3	124430275	124430447	H12-Merged-chr3-124430361-1
chr3	124431411	124432008	H12-Merged-chr3-124431709-1
chr14	60664299	60665049	H12-Merged-chr14-60664674-1
chr14	60674466	60675333	H12-Merged-chr14-60674899-1
chr3	124435174	124435590	H12-Merged-chr3-124435382-1
chr14	60700179	60700604	H12-Merged-chr14-60700391-1
chr3	124446366	124446564	H12-Merged-chr3-124446465-1
chr14	60703414	60704628	H12-Merged-chr14-60704021-1
chr15	77963209	77963394	H12-Merged-chr15-77963301-1
chr15	77964565	77965047	H12-Merged-chr15-77964806-1
chr15	78006888	78007068	H12-Merged-chr15-78006978-1
chr15	78031258	78031424	H12-Merged-chr15-78031341-1
chr4	86276068	86276299	H12-Merged-chr4-86276183-1
chr15	78060595	78061367	H12-Merged-chr15-78060981-1
chr4	86291085	86291284	H12-Merged-chr4-86291184-1
chr4	86294197	86294363	H12-Merged-chr4-86294280-1
chr15	78116394	78116813	H12-Merged-chr15-78116603-1
chr4	86388769	86389481	H12-Merged-chr4-86389125-1
chr4	86596335	86596785	H12-Merged-chr4-86596560-1
chr4	86602696	86603284	H12-Merged-chr4-86602990-1
[truncated: 46,072 more rows]

## Sheet: SE
chr	start	end	peak
chr12	6152414	6345262	100_H3K27ac_0hour_q0.05_peak_18676_lociStitched
chr3	194778811	194992717	84_H3K27ac_0hour_q0.05_peak_66186_lociStitched
chr1	22183118	22302975	40_H3K27ac_0hour_q0.05_peak_1130_lociStitched
chr17	75081771	75251418	104_H3K27ac_0hour_q0.05_peak_40081_lociStitched
chr7	27135186	27229752	46_H3K27ac_0hour_q0.05_peak_82234_lociStitched
chr8	128806072	129013870	98_H3K27ac_0hour_q0.05_peak_89434_lociStitched
chr9	130517759	130700695	70_H3K27ac_0hour_q0.05_peak_93623_lociStitched
chr2	36579833	36799535	146_H3K27ac_0hour_q0.05_peak_47302_lociStitched
chr22	36700161	36795815	49_H3K27ac_0hour_q0.05_peak_58757_lociStitched
chr12	96746055	96910452	98_H3K27ac_0hour_q0.05_peak_22337_lociStitched
chr1	21578200	21672692	53_H3K27ac_0hour_q0.05_peak_1042_lociStitched
chr2	20764493	20818556	19_H3K27ac_0hour_q0.05_peak_46680_lociStitched
chr3	57984799	58107502	82_H3K27ac_0hour_q0.05_peak_61952_lociStitched
chr1	208324518	208418693	52_H3K27ac_0hour_q0.05_peak_7653_lociStitched
chr7	100728238	100783413	18_H3K27ac_0hour_q0.05_peak_84150_lociStitched
chr15	67357135	67472368	72_H3K27ac_0hour_q0.05_peak_31240_lociStitched
chr20	36701591	36802026	36_H3K27ac_0hour_q0.05_peak_55272_lociStitched
chr6	52353981	52442661	50_H3K27ac_0hour_q0.05_peak_78253_lociStitched
chr11	86160890	86344864	63_H3K27ac_0hour_q0.05_peak_16982_lociStitched
chr10	13815293	13937029	81_H3K27ac_0hour_q0.05_peak_9666_lociStitched
chr3	129268537	129347981	35_H3K27ac_0hour_q0.05_peak_63682_lociStitched
chr9	116310450	116398312	31_H3K27ac_0hour_q0.05_peak_92877_lociStitched
chr20	45922176	45991640	32_H3K27ac_0hour_q0.05_peak_55624_lociStitched
chr15	42186499	42265370	50_H3K27ac_0hour_q0.05_peak_29956_lociStitched
chr3	149243521	149377662	107_H3K27ac_0hour_q0.05_peak_64267_lociStitched
chr9	139507778	139581875	17_H3K27ac_0hour_q0.05_peak_94290_lociStitched
chr4	7765494	7942186	73_H3K27ac_0hour_q0.05_peak_66692_lociStitched
chr10	95160067	95258112	53_H3K27ac_0hour_q0.05_peak_12242_lociStitched
chr11	9631500	9788348	66_H3K27ac_0hour_q0.05_peak_14134_lociStitched
chr6	30684159	30796948	41_H3K27ac_0hour_q0.05_peak_77210_lociStitched
chr14	75019014	75150833	48_H3K27ac_0hour_q0.05_peak_28238_lociStitched
chr11	12178656	12310322	62_H3K27ac_0hour_q0.05_peak_14351_lociStitched
chr3	11195734	11293739	38_H3K27ac_0hour_q0.05_peak_59946_lociStitched
chr1	94485817	94591995	31_H3K27ac_0hour_q0.05_peak_4247_lociStitched
chr3	30645197	30762552	87_H3K27ac_0hour_q0.05_peak_60625_lociStitched
chr15	96863904	96912017	18_H3K27ac_0hour_q0.05_peak_32530_lociStitched
chr6	148682169	148787809	67_H3K27ac_0hour_q0.05_peak_80407_lociStitched
chr16	66390843	66442923	28_H3K27ac_0hour_q0.05_peak_34626_lociStitched
chr21	39796077	39879430	62_H3K27ac_0hour_q0.05_peak_57173_lociStitched
chr19	39125613	39209118	43_H3K27ac_0hour_q0.05_peak_44652_lociStitched
chr12	120663335	120706126	18_H3K27ac_0hour_q0.05_peak_23228_lociStitched
chr2	9340914	9430235	35_H3K27ac_0hour_q0.05_peak_46245_lociStitched
chr10	104340163	104417841	22_H3K27ac_0hour_q0.05_peak_12757_lociStitched
chr11	74985087	75139718	57_H3K27ac_0hour_q0.05_peak_16597_lociStitched
chr1	39568137	39680464	69_H3K27ac_0hour_q0.05_peak_2189_lociStitched
chr11	128561792	128654904	50_H3K27ac_0hour_q0.05_peak_18287_lociStitched
chr17	62595667	62745628	71_H3K27ac_0hour_q0.05_peak_39413_lociStitched
chr10	82202456	82276994	30_H3K27ac_0hour_q0.05_peak_11897_lociStitched
chr12	96557242	96664216	66_H3K27ac_0hour_q0.05_peak_22221_lociStitched
chr14	74177996	74236123	20_H3K27ac_0hour_q0.05_peak_28155_lociStitched
chr10	33481054	33626488	86_H3K27ac_0hour_q0.05_peak_10572_lociStitched
chr22	39598294	39729050	49_H3K27ac_0hour_q0.05_peak_59114_lociStitched
chr20	23029056	23161539	51_H3K27ac_0hour_q0.05_peak_54626_lociStitched
chr9	127004416	127079005	38_H3K27ac_0hour_q0.05_peak_93329_lociStitched
chr17	46618363	46703639	32_H3K27ac_0hour_q0.05_peak_38585_lociStitched
chr6	158402227	158505332	43_H3K27ac_0hour_q0.05_peak_80941_lociStitched
chr5	172260892	172339530	36_H3K27ac_0hour_q0.05_peak_75266_lociStitched
chr14	75380953	75492682	39_H3K27ac_0hour_q0.05_peak_28265_lociStitched
chr12	111832440	111892709	25_H3K27ac_0hour_q0.05_peak_22932_lociStitched
chr12	109191611	109252273	32_H3K27ac_0hour_q0.05_peak_22755_lociStitched
chr1	16449593	16514412	17_H3K27ac_0hour_q0.05_peak_794_lociStitched
chr5	34648924	34763154	58_H3K27ac_0hour_q0.05_peak_71259_lociStitched
chr1	85724365	85812192	54_H3K27ac_0hour_q0.05_peak_3846_lociStitched
chr5	14142174	14278590	71_H3K27ac_0hour_q0.05_peak_70764_lociStitched
chr2	159882543	160046037	81_H3K27ac_0hour_q0.05_peak_50906_lociStitched
chr2	235859594	235963650	50_H3K27ac_0hour_q0.05_peak_53474_lociStitched
chr3	159478936	159610533	57_H3K27ac_0hour_q0.05_peak_64775_lociStitched
chr12	54786499	54833547	21_H3K27ac_0hour_q0.05_peak_20730_lociStitched
chr6	112465783	112576583	82_H3K27ac_0hour_q0.05_peak_79307_lociStitched
chr2	201979518	202059737	31_H3K27ac_0hour_q0.05_peak_52196_lociStitched
chr10	101665506	101770389	77_H3K27ac_0hour_q0.05_peak_12593_lociStitched
chr20	31019863	31106120	39_H3K27ac_0hour_q0.05_peak_54871_lociStitched
chr11	62306219	62399340	27_H3K27ac_0hour_q0.05_peak_15682_lociStitched
chr1	223887954	223965267	37_H3K27ac_0hour_q0.05_peak_8095_lociStitched
chr12	52278518	52321765	21_H3K27ac_0hour_q0.05_peak_20531_lociStitched
chr9	130257620	130351998	44_H3K27ac_0hour_q0.05_peak_93510_lociStitched
chr20	30249149	30311784	40_H3K27ac_0hour_q0.05_peak_54775_lociStitched
chr18	55435319	55514354	52_H3K27ac_0hour_q0.05_peak_42113_lociStitched
chr1	235093309	235148890	23_H3K27ac_0hour_q0.05_peak_8701_lociStitched
chr2	71679517	71738670	32_H3K27ac_0hour_q0.05_peak_48707_lociStitched
chr17	2074273	2119717	15_H3K27ac_0hour_q0.05_peak_36314_lociStitched
chr17	6915054	6964714	16_H3K27ac_0hour_q0.05_peak_36611_lociStitched
chr3	46944525	47031019	35_H3K27ac_0hour_q0.05_peak_61367_lociStitched
chr1	156039462	156101583	20_H3K27ac_0hour_q0.05_peak_5727_lociStitched
chr12	105803117	105901985	38_H3K27ac_0hour_q0.05_peak_22611_lociStitched
chr5	151038777	151098938	21_H3K27ac_0hour_q0.05_peak_74818_lociStitched
chr9	37984742	38088784	39_H3K27ac_0hour_q0.05_peak_91333_lociStitched
chr12	125135535	125231602	32_H3K27ac_0hour_q0.05_peak_23643_lociStitched
chr8	17504999	17557034	38_H3K27ac_0hour_q0.05_peak_86517_lociStitched
chr11	33710172	33759457	33_H3K27ac_0hour_q0.05_peak_14871_lociStitched
chr14	69347696	69449524	48_H3K27ac_0hour_q0.05_peak_27948_lociStitched
chr13	97874144	97935614	44_H3K27ac_0hour_q0.05_peak_25630_lociStitched
chr9	112777499	112914970	63_H3K27ac_0hour_q0.05_peak_92637_lociStitched
chr22	23520880	23587429	29_H3K27ac_0hour_q0.05_peak_57916_lociStitched
chr1	208058062	208140410	39_H3K27ac_0hour_q0.05_peak_7589_lociStitched
chr11	65238686	65276487	16_H3K27ac_0hour_q0.05_peak_15942_lociStitched
chr20	1281323	1325997	14_H3K27ac_0hour_q0.05_peak_53863_lociStitched
chr22	19928157	20009895	31_H3K27ac_0hour_q0.05_peak_57768_lociStitched
chr7	107555370	107662047	56_H3K27ac_0hour_q0.05_peak_84497_lociStitched
chr10	74055663	74100319	17_H3K27ac_0hour_q0.05_peak_11513_lociStitched
chr17	76300392	76416610	41_H3K27ac_0hour_q0.05_peak_40279_lociStitched
chr6	26155867	26253121	32_H3K27ac_0hour_q0.05_peak_76926_lociStitched
chr2	105976186	106027087	33_H3K27ac_0hour_q0.05_peak_49626_lociStitched
chr22	22290630	22307996	5_H3K27ac_0hour_q0.05_peak_57889_lociStitched
chr6	151317735	151402979	39_H3K27ac_0hour_q0.05_peak_80586_lociStitched
chr5	141183487	141258832	24_H3K27ac_0hour_q0.05_peak_74241_lociStitched
chr11	65138345	65204105	16_H3K27ac_0hour_q0.05_peak_15917_lociStitched
chr12	50030847	50069543	13_H3K27ac_0hour_q0.05_peak_20342_lociStitched
chr18	3580112	3626223	15_H3K27ac_0hour_q0.05_peak_40800_lociStitched
chr22	19860908	19884231	5_H3K27ac_0hour_q0.05_peak_57755_lociStitched
chr8	8084796	8243925	40_H3K27ac_0hour_q0.05_peak_86112_lociStitched
chr12	52556502	52638642	25_H3K27ac_0hour_q0.05_peak_20585_lociStitched
chr22	37876648	37963386	28_H3K27ac_0hour_q0.05_peak_58894_lociStitched
chr8	142010116	142051912	15_H3K27ac_0hour_q0.05_peak_89948_lociStitched
chr1	172852031	172946179	40_H3K27ac_0hour_q0.05_peak_6337_lociStitched
chr6	3795636	3833708	19_H3K27ac_0hour_q0.05_peak_75837_lociStitched
chr18	33010675	33078380	22_H3K27ac_0hour_q0.05_peak_41618_lociStitched
chr16	81506471	81560976	28_H3K27ac_0hour_q0.05_peak_35462_lociStitched
chr1	25009707	25103426	36_H3K27ac_0hour_q0.05_peak_1350_lociStitched
chr1	155900638	155959258	20_H3K27ac_0hour_q0.05_peak_5685_lociStitched
chr5	141658985	141707753	22_H3K27ac_0hour_q0.05_peak_74314_lociStitched
chr3	15670813	15690963	11_H3K27ac_0hour_q0.05_peak_60237_lociStitched
chr19	16389481	16470527	35_H3K27ac_0hour_q0.05_peak_43876_lociStitched
chr13	111021868	111086040	37_H3K27ac_0hour_q0.05_peak_26105_lociStitched
chr3	185394897	185492232	43_H3K27ac_0hour_q0.05_peak_65676_lociStitched
chr15	60653250	60715039	29_H3K27ac_0hour_q0.05_peak_30741_lociStitched
chr3	50264216	50298943	16_H3K27ac_0hour_q0.05_peak_61605_lociStitched
chr17	38459606	38506692	23_H3K27ac_0hour_q0.05_peak_37952_lociStitched
chr1	68130198	68237312	44_H3K27ac_0hour_q0.05_peak_3514_lociStitched
chr12	96428413	96539830	34_H3K27ac_0hour_q0.05_peak_22172_lociStitched
chr16	75267347	75308293	18_H3K27ac_0hour_q0.05_peak_35244_lociStitched
chr3	57929771	57971503	13_H3K27ac_0hour_q0.05_peak_61889_lociStitched
chr10	3087351	3147130	33_H3K27ac_0hour_q0.05_peak_9101_lociStitched
chr10	31984431	31998770	5_H3K27ac_0hour_q0.05_peak_10425_lociStitched
chr17	73641709	73704642	26_H3K27ac_0hour_q0.05_peak_39906_lociStitched
chr2	54772790	54846071	38_H3K27ac_0hour_q0.05_peak_48060_lociStitched
chr11	124745598	124771908	11_H3K27ac_0hour_q0.05_peak_18120_lociStitched
chr6	11604593	11619357	10_H3K27ac_0hour_q0.05_peak_76255_lociStitched
chr5	42982161	43020834	15_H3K27ac_0hour_q0.05_peak_71474_lociStitched
chr1	19228523	19283767	22_H3K27ac_0hour_q0.05_peak_885_lociStitched
chr20	49962164	50045619	27_H3K27ac_0hour_q0.05_peak_55989_lociStitched
chr21	37794120	37860376	25_H3K27ac_0hour_q0.05_peak_57011_lociStitched
chr22	31603018	31655136	27_H3K27ac_0hour_q0.05_peak_58568_lociStitched
chr7	130565395	130607412	33_H3K27ac_0hour_q0.05_peak_85122_lociStitched
chr15	57818369	57904161	30_H3K27ac_0hour_q0.05_peak_30565_lociStitched
chr19	42711245	42791181	26_H3K27ac_0hour_q0.05_peak_44931_lociStitched
chr19	13257748	13292796	9_H3K27ac_0hour_q0.05_peak_43678_lociStitched
chr22	25348198	25411250	36_H3K27ac_0hour_q0.05_peak_58139_lociStitched
chr10	104533736	104577000	13_H3K27ac_0hour_q0.05_peak_12791_lociStitched
chr19	13932609	13991677	19_H3K27ac_0hour_q0.05_peak_43722_lociStitched
chr22	39566351	39581664	5_H3K27ac_0hour_q0.05_peak_59063_lociStitched
chr11	124609997	124641635	12_H3K27ac_0hour_q0.05_peak_18107_lociStitched
chr5	138837085	138876737	9_H3K27ac_0hour_q0.05_peak_74079_lociStitched
chr10	99243352	99313843	27_H3K27ac_0hour_q0.05_peak_12448_lociStitched
chr6	2841327	2878524	10_H3K27ac_0hour_q0.05_peak_75754_lociStitched
chr1	36788263	36867142	27_H3K27ac_0hour_q0.05_peak_2086_lociStitched
chr17	55926675	56033317	34_H3K27ac_0hour_q0.05_peak_38925_lociStitched
chr14	23286837	23322864	20_H3K27ac_0hour_q0.05_peak_26495_lociStitched
chr22	46431349	46490473	29_H3K27ac_0hour_q0.05_peak_59471_lociStitched
chr10	106053155	106106112	16_H3K27ac_0hour_q0.05_peak_12894_lociStitched
chr3	42054510	42115305	28_H3K27ac_0hour_q0.05_peak_61078_lociStitched
chr17	32560686	32586341	15_H3K27ac_0hour_q0.05_peak_37642_lociStitched
chr2	109196083	109305973	50_H3K27ac_0hour_q0.05_peak_49703_lociStitched
chr14	69224739	69283509	12_H3K27ac_0hour_q0.05_peak_27902_lociStitched
chr22	25480589	25550931	30_H3K27ac_0hour_q0.05_peak_58161_lociStitched
chr13	99532441	99635999	44_H3K27ac_0hour_q0.05_peak_25776_lociStitched
chr1	16073652	16127574	16_H3K27ac_0hour_q0.05_peak_744_lociStitched
chr16	68261218	68368338	24_H3K27ac_0hour_q0.05_peak_34828_lociStitched
chr16	81711078	81791091	25_H3K27ac_0hour_q0.05_peak_35533_lociStitched
chr8	142126771	142183940	23_H3K27ac_0hour_q0.05_peak_89980_lociStitched
chr19	11353743	11405113	25_H3K27ac_0hour_q0.05_peak_43548_lociStitched
chr1	59182929	59257135	21_H3K27ac_0hour_q0.05_peak_3053_lociStitched
chr10	129764911	129847003	29_H3K27ac_0hour_q0.05_peak_13569_lociStitched
chr6	36778407	36854209	15_H3K27ac_0hour_q0.05_peak_77687_lociStitched
chr9	35726609	35799241	29_H3K27ac_0hour_q0.05_peak_91207_lociStitched
chr16	27245465	27280893	15_H3K27ac_0hour_q0.05_peak_33807_lociStitched
chr5	148667135	148729030	30_H3K27ac_0hour_q0.05_peak_74617_lociStitched
chr7	22599829	22650088	18_H3K27ac_0hour_q0.05_peak_82022_lociStitched
chr1	38454927	38496621	22_H3K27ac_0hour_q0.05_peak_2163_lociStitched
chr19	11237057	11315447	38_H3K27ac_0hour_q0.05_peak_43506_lociStitched
chr17	1924302	2010022	24_H3K27ac_0hour_q0.05_peak_36295_lociStitched
chr17	62051814	62103210	24_H3K27ac_0hour_q0.05_peak_39329_lociStitched
chr6	129940138	130048506	57_H3K27ac_0hour_q0.05_peak_79710_lociStitched
chr22	38597332	38637748	16_H3K27ac_0hour_q0.05_peak_58988_lociStitched
chr1	2120542	2253639	36_H3K27ac_0hour_q0.05_peak_121_lociStitched
chr4	57904508	58004123	47_H3K27ac_0hour_q0.05_peak_67757_lociStitched
chr22	24755150	24870388	42_H3K27ac_0hour_q0.05_peak_58050_lociStitched
chr11	86618729	86680961	26_H3K27ac_0hour_q0.05_peak_17022_lociStitched
chr14	23004943	23068540	27_H3K27ac_0hour_q0.05_peak_26444_lociStitched
chr9	6550792	6568795	12_H3K27ac_0hour_q0.05_peak_90374_lociStitched
chr20	1344450	1382319	27_H3K27ac_0hour_q0.05_peak_53899_lociStitched
chr1	204367317	204447511	26_H3K27ac_0hour_q0.05_peak_7346_lociStitched
chr16	89362498	89410798	19_H3K27ac_0hour_q0.05_peak_35983_lociStitched
chr1	45240296	45286261	15_H3K27ac_0hour_q0.05_peak_2586_lociStitched
chr14	55089210	55165365	45_H3K27ac_0hour_q0.05_peak_27304_lociStitched
chr17	79518029	79545069	17_H3K27ac_0hour_q0.05_peak_40478_lociStitched
chr21	33758561	33873393	34_H3K27ac_0hour_q0.05_peak_56788_lociStitched
chr11	69060131	69089895	14_H3K27ac_0hour_q0.05_peak_16235_lociStitched
chr19	47652997	47714893	35_H3K27ac_0hour_q0.05_peak_45403_lociStitched
chr6	7954566	8007461	25_H3K27ac_0hour_q0.05_peak_76114_lociStitched
chr2	238581583	238653750	37_H3K27ac_0hour_q0.05_peak_53623_lociStitched
chr11	65655006	65687103	13_H3K27ac_0hour_q0.05_peak_15998_lociStitched
chr9	139398672	139446448	20_H3K27ac_0hour_q0.05_peak_94276_lociStitched
chr3	171488833	171529115	28_H3K27ac_0hour_q0.05_peak_65174_lociStitched
chr7	131186308	131243088	33_H3K27ac_0hour_q0.05_peak_85171_lociStitched
chr3	111614305	111698401	56_H3K27ac_0hour_q0.05_peak_62996_lociStitched
chr12	48193479	48223450	14_H3K27ac_0hour_q0.05_peak_20207_lociStitched
chr10	71198225	71267691	23_H3K27ac_0hour_q0.05_peak_11306_lociStitched
chr12	95998089	96068712	26_H3K27ac_0hour_q0.05_peak_22124_lociStitched
chr2	112655098	112734170	35_H3K27ac_0hour_q0.05_peak_49956_lociStitched
chr8	134497493	134596851	36_H3K27ac_0hour_q0.05_peak_89773_lociStitched
chr16	20909233	20926135	12_H3K27ac_0hour_q0.05_peak_33579_lociStitched
chr7	39620419	39674141	39_H3K27ac_0hour_q0.05_peak_82652_lociStitched
chr2	113381589	113450893	19_H3K27ac_0hour_q0.05_peak_50022_lociStitched
chr2	28609416	28647541	17_H3K27ac_0hour_q0.05_peak_46994_lociStitched
chr8	49309627	49345757	8_H3K27ac_0hour_q0.05_peak_87694_lociStitched
chr19	41807751	41841776	10_H3K27ac_0hour_q0.05_peak_44859_lociStitched
chr7	44408006	44448851	20_H3K27ac_0hour_q0.05_peak_82852_lociStitched
chr14	77489612	77526560	19_H3K27ac_0hour_q0.05_peak_28446_lociStitched
chr12	13348553	13368404	9_H3K27ac_0hour_q0.05_peak_19288_lociStitched
chr3	50354529	50396973	16_H3K27ac_0hour_q0.05_peak_61624_lociStitched
chr7	116139074	116195428	31_H3K27ac_0hour_q0.05_peak_84778_lociStitched
chr12	123318488	123380661	21_H3K27ac_0hour_q0.05_peak_23461_lociStitched
chr14	61764805	61833384	36_H3K27ac_0hour_q0.05_peak_27552_lociStitched
chr20	49087317	49190352	38_H3K27ac_0hour_q0.05_peak_55957_lociStitched
chr6	46840980	46923666	32_H3K27ac_0hour_q0.05_peak_78087_lociStitched
chr1	157962135	158028211	23_H3K27ac_0hour_q0.05_peak_5825_lociStitched
chr1	94017570	94102759	37_H3K27ac_0hour_q0.05_peak_4159_lociStitched
chr6	7874666	7916248	36_H3K27ac_0hour_q0.05_peak_76062_lociStitched
chr7	100025962	100092115	29_H3K27ac_0hour_q0.05_peak_84058_lociStitched
chr3	134075912	134094366	8_H3K27ac_0hour_q0.05_peak_63841_lociStitched
chr5	72900425	73012544	47_H3K27ac_0hour_q0.05_peak_72398_lociStitched
chr14	95948863	96015847	22_H3K27ac_0hour_q0.05_peak_28890_lociStitched
chr6	30456731	30525699	32_H3K27ac_0hour_q0.05_peak_77157_lociStitched
chr5	55394181	55509969	41_H3K27ac_0hour_q0.05_peak_71710_lociStitched
chr16	24984219	25011550	19_H3K27ac_0hour_q0.05_peak_33773_lociStitched
chr2	56188463	56245841	31_H3K27ac_0hour_q0.05_peak_48231_lociStitched
chr17	17580367	17657540	23_H3K27ac_0hour_q0.05_peak_37023_lociStitched
chr2	207986234	208032208	24_H3K27ac_0hour_q0.05_peak_52512_lociStitched
chr10	80886656	80921192	16_H3K27ac_0hour_q0.05_peak_11809_lociStitched
chr5	149821250	149903942	22_H3K27ac_0hour_q0.05_peak_74711_lociStitched
chr10	112135604	112175155	10_H3K27ac_0hour_q0.05_peak_12956_lociStitched
chr10	30315230	30353239	17_H3K27ac_0hour_q0.05_peak_10266_lociStitched
chr17	40530944	40594293	22_H3K27ac_0hour_q0.05_peak_38106_lociStitched
chr17	37008094	37079421	23_H3K27ac_0hour_q0.05_peak_37841_lociStitched
chr12	25042043	25102564	25_H3K27ac_0hour_q0.05_peak_19477_lociStitched
chr17	40660397	40689649	11_H3K27ac_0hour_q0.05_peak_38132_lociStitched
chr13	21587231	21655565	27_H3K27ac_0hour_q0.05_peak_23860_lociStitched
chr9	134575398	134615097	20_H3K27ac_0hour_q0.05_peak_94041_lociStitched
chr17	38252333	38297536	16_H3K27ac_0hour_q0.05_peak_37929_lociStitched
chr15	39416167	39435397	14_H3K27ac_0hour_q0.05_peak_29668_lociStitched
chr5	71737031	71819950	26_H3K27ac_0hour_q0.05_peak_72308_lociStitched
chr17	62392420	62410865	13_H3K27ac_0hour_q0.05_peak_39369_lociStitched
chr2	43385007	43412740	12_H3K27ac_0hour_q0.05_peak_47643_lociStitched
chr6	33736593	33757545	10_H3K27ac_0hour_q0.05_peak_77457_lociStitched
chr8	55047120	55092935	30_H3K27ac_0hour_q0.05_peak_87796_lociStitched
chr1	32014774	32064042	21_H3K27ac_0hour_q0.05_peak_1803_lociStitched
chr10	45469844	45497299	10_H3K27ac_0hour_q0.05_peak_10819_lociStitched
chr2	43123734	43159470	12_H3K27ac_0hour_q0.05_peak_47593_lociStitched
chr3	171842813	171900511	29_H3K27ac_0hour_q0.05_peak_65224_lociStitched
chr5	76070330	76132677	25_H3K27ac_0hour_q0.05_peak_72576_lociStitched
chr10	71561074	71634336	45_H3K27ac_0hour_q0.05_peak_11337_lociStitched
chr7	131304022	131343619	10_H3K27ac_0hour_q0.05_peak_85203_lociStitched
chr1	156426084	156476005	13_H3K27ac_0hour_q0.05_peak_5766_lociStitched
chr8	38614242	38666017	27_H3K27ac_0hour_q0.05_peak_87414_lociStitched
chr12	11946350	11993661	19_H3K27ac_0hour_q0.05_peak_19103_lociStitched
chr13	114866637	114897998	17_H3K27ac_0hour_q0.05_peak_26298_lociStitched
chr11	76287659	76349135	14_H3K27ac_0hour_q0.05_peak_16691_lociStitched
chr1	47673661	47707699	14_H3K27ac_0hour_q0.05_peak_2718_lociStitched
chr10	13695491	13759156	35_H3K27ac_0hour_q0.05_peak_9601_lociStitched
chr20	39765100	39808070	14_H3K27ac_0hour_q0.05_peak_55392_lociStitched
chr11	64614849	64655968	17_H3K27ac_0hour_q0.05_peak_15839_lociStitched
chr20	47334431	47411111	28_H3K27ac_0hour_q0.05_peak_55729_lociStitched
chr8	23385395	23428652	22_H3K27ac_0hour_q0.05_peak_86793_lociStitched
chr10	126723537	126781901	25_H3K27ac_0hour_q0.05_peak_13465_lociStitched
chr1	23874806	23919872	14_H3K27ac_0hour_q0.05_peak_1309_lociStitched
chr2	39692263	39778087	25_H3K27ac_0hour_q0.05_peak_47512_lociStitched
chr9	116245504	116296180	21_H3K27ac_0hour_q0.05_peak_92856_lociStitched
chr19	45901634	45996610	29_H3K27ac_0hour_q0.05_peak_45165_lociStitched
chr17	47880049	47929267	22_H3K27ac_0hour_q0.05_peak_38680_lociStitched
chr1	154928056	154956802	6_H3K27ac_0hour_q0.05_peak_5589_lociStitched
chr6	11193740	11237231	30_H3K27ac_0hour_q0.05_peak_76208_lociStitched
chr15	74243705	74333538	18_H3K27ac_0hour_q0.05_peak_31611_lociStitched
chr20	48595742	48664981	17_H3K27ac_0hour_q0.05_peak_55872_lociStitched
chr9	677612	717429	19_H3K27ac_0hour_q0.05_peak_90174_lociStitched
chr19	38482690	38535331	19_H3K27ac_0hour_q0.05_peak_44570_lociStitched
chr1	175474650	175519071	26_H3K27ac_0hour_q0.05_peak_6460_lociStitched
chr3	171542216	171594204	28_H3K27ac_0hour_q0.05_peak_65192_lociStitched
chr8	10631285	10682787	31_H3K27ac_0hour_q0.05_peak_86260_lociStitched
chr10	17027743	17052165	17_H3K27ac_0hour_q0.05_peak_9894_lociStitched
chr17	61497161	61556243	22_H3K27ac_0hour_q0.05_peak_39246_lociStitched
chr22	36821806	36878524	19_H3K27ac_0hour_q0.05_peak_58809_lociStitched
chr8	23173352	23223551	19_H3K27ac_0hour_q0.05_peak_86760_lociStitched
chr6	44183988	44233316	17_H3K27ac_0hour_q0.05_peak_78020_lociStitched
chr3	127451266	127524219	28_H3K27ac_0hour_q0.05_peak_63507_lociStitched
chr5	75975198	76017009	20_H3K27ac_0hour_q0.05_peak_72552_lociStitched
chr11	118478335	118502292	6_H3K27ac_0hour_q0.05_peak_17807_lociStitched
chr12	125389089	125426059	9_H3K27ac_0hour_q0.05_peak_23674_lociStitched
chr9	114757369	114841434	31_H3K27ac_0hour_q0.05_peak_92778_lociStitched
chr19	4368275	4403808	19_H3K27ac_0hour_q0.05_peak_43059_lociStitched
chr9	124022776	124062595	13_H3K27ac_0hour_q0.05_peak_93105_lociStitched
chr11	61559547	61623360	21_H3K27ac_0hour_q0.05_peak_15614_lociStitched
chr9	14180698	14278687	53_H3K27ac_0hour_q0.05_peak_90511_lociStitched
chr15	39869667	39891982	12_H3K27ac_0hour_q0.05_peak_29743_lociStitched
chr12	6431089	6494305	18_H3K27ac_0hour_q0.05_peak_18793_lociStitched
chr1	94127042	94175115	22_H3K27ac_0hour_q0.05_peak_4195_lociStitched
chr1	234852847	234882783	10_H3K27ac_0hour_q0.05_peak_8658_lociStitched
chr6	11646962	11657591	7_H3K27ac_0hour_q0.05_peak_76268_lociStitched
chr14	90848523	90896626	26_H3K27ac_0hour_q0.05_peak_28667_lociStitched
chr16	82660260	82691931	11_H3K27ac_0hour_q0.05_peak_35557_lociStitched
chr17	8042426	8130706	30_H3K27ac_0hour_q0.05_peak_36759_lociStitched
chr11	119175608	119212437	18_H3K27ac_0hour_q0.05_peak_17863_lociStitched
chr4	3293150	3373573	26_H3K27ac_0hour_q0.05_peak_66506_lociStitched
chr3	158362295	158449889	51_H3K27ac_0hour_q0.05_peak_64713_lociStitched
chr1	201451558	201482182	18_H3K27ac_0hour_q0.05_peak_7081_lociStitched
chr22	47125422	47166972	18_H3K27ac_0hour_q0.05_peak_59519_lociStitched
chr5	149973609	150032531	22_H3K27ac_0hour_q0.05_peak_74754_lociStitched
chr1	101700598	101730753	15_H3K27ac_0hour_q0.05_peak_4609_lociStitched
chr17	8257383	8288900	19_H3K27ac_0hour_q0.05_peak_36774_lociStitched
chr17	80801975	80852410	21_H3K27ac_0hour_q0.05_peak_40609_lociStitched
chr6	31508024	31532144	12_H3K27ac_0hour_q0.05_peak_77284_lociStitched
chr8	22891859	22978661	24_H3K27ac_0hour_q0.05_peak_86713_lociStitched
chr3	39176714	39220724	10_H3K27ac_0hour_q0.05_peak_60964_lociStitched
chr5	133885404	133922903	14_H3K27ac_0hour_q0.05_peak_73857_lociStitched
chr8	125604946	125672934	22_H3K27ac_0hour_q0.05_peak_89206_lociStitched
chr21	27256513	27370458	48_H3K27ac_0hour_q0.05_peak_56586_lociStitched
chr4	141006089	141057430	17_H3K27ac_0hour_q0.05_peak_69430_lociStitched
chr10	112247274	112294227	19_H3K27ac_0hour_q0.05_peak_12983_lociStitched
chr11	12101519	12115918	5_H3K27ac_0hour_q0.05_peak_14307_lociStitched
chr7	43676436	43710152	10_H3K27ac_0hour_q0.05_peak_82800_lociStitched
chr8	17458528	17488593	16_H3K27ac_0hour_q0.05_peak_86501_lociStitched
chr16	77598694	77631935	19_H3K27ac_0hour_q0.05_peak_35335_lociStitched
chr3	16089908	16131675	24_H3K27ac_0hour_q0.05_peak_60271_lociStitched
chrX	128740681	128813234	26_H3K27ac_0hour_q0.05_peak_96637_lociStitched
chr3	194378292	194415667	26_H3K27ac_0hour_q0.05_peak_66079_lociStitched
chr8	26114427	26126538	8_H3K27ac_0hour_q0.05_peak_86863_lociStitched
chr2	101473791	101524930	21_H3K27ac_0hour_q0.05_peak_49413_lociStitched
chr20	62668625	62695047	11_H3K27ac_0hour_q0.05_peak_56435_lociStitched
chr2	85804490	85844371	15_H3K27ac_0hour_q0.05_peak_49015_lociStitched
chr15	39518890	39594417	36_H3K27ac_0hour_q0.05_peak_29702_lociStitched
chr10	8087203	8116209	17_H3K27ac_0hour_q0.05_peak_9433_lociStitched
chr9	131636641	131680096	16_H3K27ac_0hour_q0.05_peak_93752_lociStitched
chr1	235028477	235069920	11_H3K27ac_0hour_q0.05_peak_8670_lociStitched
chr6	26017385	26066771	17_H3K27ac_0hour_q0.05_peak_76894_lociStitched
chr14	35802230	35892106	28_H3K27ac_0hour_q0.05_peak_26826_lociStitched
chr1	12484434	12542143	17_H3K27ac_0hour_q0.05_peak_632_lociStitched
chr9	134530631	134558363	13_H3K27ac_0hour_q0.05_peak_94019_lociStitched
chr1	205550517	205601766	19_H3K27ac_0hour_q0.05_peak_7415_lociStitched
chr3	32432559	32466426	19_H3K27ac_0hour_q0.05_peak_60758_lociStitched
chr15	77773484	77801849	9_H3K27ac_0hour_q0.05_peak_31823_lociStitched
chrX	64887122	64943733	43_H3K27ac_0hour_q0.05_peak_95829_lociStitched
chr9	5487759	5513326	14_H3K27ac_0hour_q0.05_peak_90313_lociStitched
chr8	42109543	42169305	24_H3K27ac_0hour_q0.05_peak_87584_lociStitched
chr13	110946521	111000788	28_H3K27ac_0hour_q0.05_peak_26098_lociStitched
chr19	2527766	2580267	17_H3K27ac_0hour_q0.05_peak_42880_lociStitched
chr2	110849105	110874781	11_H3K27ac_0hour_q0.05_peak_49825_lociStitched
chr1	161123389	161173567	14_H3K27ac_0hour_q0.05_peak_5966_lociStitched
chr16	66542359	66559643	5_H3K27ac_0hour_q0.05_peak_34634_lociStitched
chr17	57824701	57884029	30_H3K27ac_0hour_q0.05_peak_39107_lociStitched
chr15	41186095	41246050	16_H3K27ac_0hour_q0.05_peak_29858_lociStitched
chr1	59340430	59375908	19_H3K27ac_0hour_q0.05_peak_3089_lociStitched
chr22	38561192	38583970	9_H3K27ac_0hour_q0.05_peak_58977_lociStitched
chr5	77786858	77830832	13_H3K27ac_0hour_q0.05_peak_72619_lociStitched
chr12	52363736	52444680	23_H3K27ac_0hour_q0.05_peak_20564_lociStitched
chr17	73839808	73875185	16_H3K27ac_0hour_q0.05_peak_39939_lociStitched
chr20	19909436	19984720	24_H3K27ac_0hour_q0.05_peak_54518_lociStitched
chr1	153570018	153608083	11_H3K27ac_0hour_q0.05_peak_5451_lociStitched
chr9	35488937	35540092	15_H3K27ac_0hour_q0.05_peak_91166_lociStitched
chr4	8184414	8212746	15_H3K27ac_0hour_q0.05_peak_66735_lociStitched
chr22	50311514	50364369	13_H3K27ac_0hour_q0.05_peak_59582_lociStitched
chr21	46493993	46531271	18_H3K27ac_0hour_q0.05_peak_57533_lociStitched
chr7	111799371	111847541	29_H3K27ac_0hour_q0.05_peak_84650_lociStitched
chr1	9456813	9475386	5_H3K27ac_0hour_q0.05_peak_471_lociStitched
chr1	41467259	41513017	19_H3K27ac_0hour_q0.05_peak_2383_lociStitched
chr21	46285473	46302690	12_H3K27ac_0hour_q0.05_peak_57481_lociStitched
chr8	125208766	125284445	30_H3K27ac_0hour_q0.05_peak_89176_lociStitched
chr2	46272529	46326474	22_H3K27ac_0hour_q0.05_peak_47792_lociStitched
chr1	112929468	112947647	11_H3K27ac_0hour_q0.05_peak_4808_lociStitched
chr1	86032556	86049271	13_H3K27ac_0hour_q0.05_peak_3921_lociStitched
chr2	128391180	128439487	21_H3K27ac_0hour_q0.05_peak_50266_lociStitched
chr15	65115687	65197812	25_H3K27ac_0hour_q0.05_peak_31020_lociStitched
chr11	128362203	128395960	17_H3K27ac_0hour_q0.05_peak_18245_lociStitched
chr15	78326625	78369861	21_H3K27ac_0hour_q0.05_peak_31839_lociStitched
chr17	57490348	57519767	14_H3K27ac_0hour_q0.05_peak_39046_lociStitched
chr16	86929152	86986717	16_H3K27ac_0hour_q0.05_peak_35798_lociStitched
chr3	149084974	149120051	21_H3K27ac_0hour_q0.05_peak_64195_lociStitched
chr14	105632854	105669421	19_H3K27ac_0hour_q0.05_peak_29284_lociStitched
chr18	3446147	3478701	14_H3K27ac_0hour_q0.05_peak_40784_lociStitched
chr7	115955346	116004487	24_H3K27ac_0hour_q0.05_peak_84738_lociStitched
chr12	13023103	13081143	27_H3K27ac_0hour_q0.05_peak_19224_lociStitched
chr14	20868371	20946583	17_H3K27ac_0hour_q0.05_peak_26345_lociStitched
chr4	10079243	10126567	19_H3K27ac_0hour_q0.05_peak_66786_lociStitched
chr16	56638775	56666954	9_H3K27ac_0hour_q0.05_peak_34357_lociStitched
chr6	13393238	13429953	17_H3K27ac_0hour_q0.05_peak_76369_lociStitched
chr7	139732705	139763580	13_H3K27ac_0hour_q0.05_peak_85534_lociStitched
chr3	45671688	45732376	21_H3K27ac_0hour_q0.05_peak_61310_lociStitched
chr1	43907463	43945963	17_H3K27ac_0hour_q0.05_peak_2501_lociStitched
chr1	154452575	154475387	17_H3K27ac_0hour_q0.05_peak_5543_lociStitched
chr2	216558176	216661241	42_H3K27ac_0hour_q0.05_peak_52701_lociStitched
chr1	234734300	234768992	18_H3K27ac_0hour_q0.05_peak_8637_lociStitched
chr7	5436463	5470125	6_H3K27ac_0hour_q0.05_peak_81574_lociStitched
chr15	40605914	40637437	18_H3K27ac_0hour_q0.05_peak_29824_lociStitched
chr16	53105304	53134773	10_H3K27ac_0hour_q0.05_peak_34259_lociStitched
chr3	14472591	14531088	21_H3K27ac_0hour_q0.05_peak_60157_lociStitched
chrX	12964483	13016884	23_H3K27ac_0hour_q0.05_peak_94628_lociStitched
chr5	60558682	60638016	28_H3K27ac_0hour_q0.05_peak_71948_lociStitched
chr1	201708467	201762790	27_H3K27ac_0hour_q0.05_peak_7142_lociStitched
chr8	124473047	124514845	21_H3K27ac_0hour_q0.05_peak_89112_lociStitched
chr3	10206592	10248766	9_H3K27ac_0hour_q0.05_peak_59896_lociStitched
chr3	5018547	5037663	11_H3K27ac_0hour_q0.05_peak_59704_lociStitched
chr11	73017770	73047317	16_H3K27ac_0hour_q0.05_peak_16428_lociStitched
chr5	34571088	34629178	20_H3K27ac_0hour_q0.05_peak_71199_lociStitched
chr11	126202394	126226605	12_H3K27ac_0hour_q0.05_peak_18194_lociStitched
chr1	94761657	94801332	26_H3K27ac_0hour_q0.05_peak_4320_lociStitched
chr3	50193038	50209771	2_H3K27ac_0hour_q0.05_peak_61600_lociStitched
chr8	38849718	38908631	32_H3K27ac_0hour_q0.05_peak_87444_lociStitched
chr10	14596148	14671909	35_H3K27ac_0hour_q0.05_peak_9732_lociStitched
chr17	45300089	45357373	15_H3K27ac_0hour_q0.05_peak_38473_lociStitched
chr1	156862360	156882064	7_H3K27ac_0hour_q0.05_peak_5808_lociStitched
chr5	148802037	148851743	11_H3K27ac_0hour_q0.05_peak_74633_lociStitched
chr11	11994983	12039220	17_H3K27ac_0hour_q0.05_peak_14287_lociStitched
chr1	153483307	153544941	14_H3K27ac_0hour_q0.05_peak_5435_lociStitched
chr1	66797321	66839673	24_H3K27ac_0hour_q0.05_peak_3401_lociStitched
chr10	21601966	21662867	20_H3K27ac_0hour_q0.05_peak_9992_lociStitched
chr19	18385344	18460872	19_H3K27ac_0hour_q0.05_peak_44090_lociStitched
chr22	44416314	44464643	18_H3K27ac_0hour_q0.05_peak_59408_lociStitched
chr8	26297131	26324073	15_H3K27ac_0hour_q0.05_peak_86901_lociStitched
chr1	204042236	204100935	16_H3K27ac_0hour_q0.05_peak_7309_lociStitched
chr14	77412978	77429061	8_H3K27ac_0hour_q0.05_peak_28425_lociStitched
chr5	95897098	95950752	31_H3K27ac_0hour_q0.05_peak_73006_lociStitched
chrX	9964155	10020492	27_H3K27ac_0hour_q0.05_peak_94533_lociStitched
chr20	48752302	48789544	20_H3K27ac_0hour_q0.05_peak_55902_lociStitched
chr17	421172	477933	13_H3K27ac_0hour_q0.05_peak_36101_lociStitched
chr1	100103386	100172481	31_H3K27ac_0hour_q0.05_peak_4509_lociStitched
chr16	16076939	16100261	14_H3K27ac_0hour_q0.05_peak_33428_lociStitched
chr2	173073177	173119243	12_H3K27ac_0hour_q0.05_peak_51341_lociStitched
chr5	139678293	139726632	23_H3K27ac_0hour_q0.05_peak_74161_lociStitched
chr16	29972821	30008378	8_H3K27ac_0hour_q0.05_peak_33983_lociStitched
chr15	31275283	31327021	24_H3K27ac_0hour_q0.05_peak_29449_lociStitched
chr1	36599372	36640078	15_H3K27ac_0hour_q0.05_peak_2049_lociStitched
chr6	30640092	30659150	10_H3K27ac_0hour_q0.05_peak_77182_lociStitched
chr16	69199546	69276328	33_H3K27ac_0hour_q0.05_peak_34871_lociStitched
chr11	57528659	57569669	24_H3K27ac_0hour_q0.05_peak_15432_lociStitched
chr1	59278217	59322481	13_H3K27ac_0hour_q0.05_peak_3058_lociStitched
chr20	37427450	37459872	10_H3K27ac_0hour_q0.05_peak_55307_lociStitched
chr1	33399630	33472872	25_H3K27ac_0hour_q0.05_peak_1953_lociStitched
chr6	34979968	35016373	15_H3K27ac_0hour_q0.05_peak_77535_lociStitched
chr3	15332257	15374514	20_H3K27ac_0hour_q0.05_peak_60196_lociStitched
chr14	69500995	69527584	15_H3K27ac_0hour_q0.05_peak_27975_lociStitched
chr6	166968007	167014023	14_H3K27ac_0hour_q0.05_peak_81167_lociStitched
chr2	206545030	206579485	19_H3K27ac_0hour_q0.05_peak_52438_lociStitched
chr10	75646123	75672081	11_H3K27ac_0hour_q0.05_peak_11611_lociStitched
chr15	39110135	39141899	23_H3K27ac_0hour_q0.05_peak_29603_lociStitched
chr9	37903084	37969914	19_H3K27ac_0hour_q0.05_peak_91312_lociStitched
chr7	137650363	137689526	26_H3K27ac_0hour_q0.05_peak_85440_lociStitched
chr11	114009343	114051360	14_H3K27ac_0hour_q0.05_peak_17651_lociStitched
chr9	125575727	125598070	11_H3K27ac_0hour_q0.05_peak_93257_lociStitched
chr1	165840271	165881193	11_H3K27ac_0hour_q0.05_peak_6154_lociStitched
chr17	36603497	36629236	6_H3K27ac_0hour_q0.05_peak_37806_lociStitched
chr7	75919502	75948746	11_H3K27ac_0hour_q0.05_peak_83544_lociStitched
chr8	42028956	42073872	16_H3K27ac_0hour_q0.05_peak_87565_lociStitched
chr12	124852162	124878494	9_H3K27ac_0hour_q0.05_peak_23581_lociStitched
chr10	4805423	4869313	30_H3K27ac_0hour_q0.05_peak_9288_lociStitched
chr19	16177250	16207545	16_H3K27ac_0hour_q0.05_peak_43850_lociStitched
chr10	31251956	31303638	28_H3K27ac_0hour_q0.05_peak_10357_lociStitched
chr19	48610406	48630329	9_H3K27ac_0hour_q0.05_peak_45467_lociStitched
chr15	68627514	68683617	18_H3K27ac_0hour_q0.05_peak_31351_lociStitched
chr19	778644	802691	10_H3K27ac_0hour_q0.05_peak_42649_lociStitched
chr16	3135981	3185689	15_H3K27ac_0hour_q0.05_peak_32962_lociStitched
chr16	55504672	55544577	17_H3K27ac_0hour_q0.05_peak_34322_lociStitched
chr17	57904492	57936796	26_H3K27ac_0hour_q0.05_peak_39135_lociStitched
chr4	145546852	145599841	22_H3K27ac_0hour_q0.05_peak_69567_lociStitched
chr2	216692438	216716001	27_H3K27ac_0hour_q0.05_peak_52733_lociStitched
chr6	86158600	86176399	13_H3K27ac_0hour_q0.05_peak_78843_lociStitched
chr13	40436896	40474604	19_H3K27ac_0hour_q0.05_peak_24458_lociStitched
chr16	80964944	80983449	7_H3K27ac_0hour_q0.05_peak_35404_lociStitched
chr10	3815684	3829303	10_H3K27ac_0hour_q0.05_peak_9154_lociStitched
chr4	41110885	41165342	19_H3K27ac_0hour_q0.05_peak_67391_lociStitched
chr17	4402671	4459417	20_H3K27ac_0hour_q0.05_peak_36458_lociStitched
chr2	46483659	46506498	14_H3K27ac_0hour_q0.05_peak_47851_lociStitched
chr10	92671540	92698194	17_H3K27ac_0hour_q0.05_peak_12111_lociStitched
chr1	94639475	94747123	39_H3K27ac_0hour_q0.05_peak_4277_lociStitched
chr11	114151559	114189682	13_H3K27ac_0hour_q0.05_peak_17667_lociStitched
chr11	47395765	47449008	15_H3K27ac_0hour_q0.05_peak_15274_lociStitched
chr4	56025812	56053690	21_H3K27ac_0hour_q0.05_peak_67646_lociStitched
chr5	141570927	141643394	19_H3K27ac_0hour_q0.05_peak_74293_lociStitched
chr3	11589415	11643203	25_H3K27ac_0hour_q0.05_peak_60034_lociStitched
chr15	40355421	40401770	17_H3K27ac_0hour_q0.05_peak_29793_lociStitched
chr10	94571677	94609164	29_H3K27ac_0hour_q0.05_peak_12195_lociStitched
chr17	73030105	73128318	24_H3K27ac_0hour_q0.05_peak_39832_lociStitched
chr7	150253472	150300485	17_H3K27ac_0hour_q0.05_peak_85740_lociStitched
chr11	118779601	118800616	11_H3K27ac_0hour_q0.05_peak_17816_lociStitched
chr8	8915458	8947166	13_H3K27ac_0hour_q0.05_peak_86183_lociStitched
chr19	18473692	18503652	11_H3K27ac_0hour_q0.05_peak_44111_lociStitched
chr13	28896311	28933112	24_H3K27ac_0hour_q0.05_peak_24063_lociStitched
chr17	4842185	4915511	17_H3K27ac_0hour_q0.05_peak_36487_lociStitched
chr7	100392212	100435489	15_H3K27ac_0hour_q0.05_peak_84116_lociStitched
chr5	172174883	172234923	14_H3K27ac_0hour_q0.05_peak_75260_lociStitched
chr8	13209353	13241534	18_H3K27ac_0hour_q0.05_peak_86422_lociStitched
chr16	73081209	73105873	16_H3K27ac_0hour_q0.05_peak_35153_lociStitched
chr5	71882506	71902214	9_H3K27ac_0hour_q0.05_peak_72333_lociStitched
chr7	23371270	23421871	29_H3K27ac_0hour_q0.05_peak_82087_lociStitched
chr6	12288684	12300116	10_H3K27ac_0hour_q0.05_peak_76290_lociStitched
chr10	13965780	14035264	16_H3K27ac_0hour_q0.05_peak_9713_lociStitched
chr17	15339703	15420576	21_H3K27ac_0hour_q0.05_peak_36847_lociStitched
chr17	38170168	38195310	5_H3K27ac_0hour_q0.05_peak_37907_lociStitched
chr3	11517733	11565777	20_H3K27ac_0hour_q0.05_peak_60010_lociStitched
chr11	57037159	57103983	19_H3K27ac_0hour_q0.05_peak_15373_lociStitched
chr9	35904457	35916633	5_H3K27ac_0hour_q0.05_peak_91220_lociStitched
chr15	57612680	57633519	6_H3K27ac_0hour_q0.05_peak_30524_lociStitched
chr6	2942642	3002214	15_H3K27ac_0hour_q0.05_peak_75765_lociStitched
chr15	66993014	67072496	27_H3K27ac_0hour_q0.05_peak_31198_lociStitched
chr21	46707962	46741561	8_H3K27ac_0hour_q0.05_peak_57544_lociStitched
chr2	135154165	135209033	27_H3K27ac_0hour_q0.05_peak_50442_lociStitched
chr19	34789859	34834404	21_H3K27ac_0hour_q0.05_peak_44379_lociStitched
chr12	51761302	51789674	13_H3K27ac_0hour_q0.05_peak_20491_lociStitched
chr9	125062366	125112864	16_H3K27ac_0hour_q0.05_peak_93239_lociStitched
chr2	238508474	238537149	9_H3K27ac_0hour_q0.05_peak_53606_lociStitched
chr5	141015624	141063823	13_H3K27ac_0hour_q0.05_peak_74232_lociStitched
chr20	19864704	19895803	11_H3K27ac_0hour_q0.05_peak_54500_lociStitched
chr15	42065572	42102181	22_H3K27ac_0hour_q0.05_peak_29930_lociStitched
chr1	203575504	203663265	23_H3K27ac_0hour_q0.05_peak_7280_lociStitched
chr7_gl000195_random	65757	87215	12_H3K27ac_0hour_q0.05_peak_85984_lociStitched
chr11	107680520	107714986	11_H3K27ac_0hour_q0.05_peak_17416_lociStitched
chr21	40356692	40379268	11_H3K27ac_0hour_q0.05_peak_57232_lociStitched
chr1	32687304	32733734	14_H3K27ac_0hour_q0.05_peak_1878_lociStitched
chr2	225254331	225283279	17_H3K27ac_0hour_q0.05_peak_53105_lociStitched
chr10	121410359	121461810	19_H3K27ac_0hour_q0.05_peak_13240_lociStitched
chr3	197182740	197249011	13_H3K27ac_0hour_q0.05_peak_66323_lociStitched
chr12	12008128	12045878	18_H3K27ac_0hour_q0.05_peak_19128_lociStitched
chr11	775419	848512	24_H3K27ac_0hour_q0.05_peak_13768_lociStitched
chr7	5665674	5718358	23_H3K27ac_0hour_q0.05_peak_81613_lociStitched
chr1	153699926	153763401	18_H3K27ac_0hour_q0.05_peak_5480_lociStitched
chr2	64486782	64515867	15_H3K27ac_0hour_q0.05_peak_48370_lociStitched
chr6	33239009	33291623	17_H3K27ac_0hour_q0.05_peak_77401_lociStitched
chr12	65001856	65028968	21_H3K27ac_0hour_q0.05_peak_21160_lociStitched
chr1	65317015	65364609	26_H3K27ac_0hour_q0.05_peak_3303_lociStitched
chr3	194722341	194755739	8_H3K27ac_0hour_q0.05_peak_66135_lociStitched
chr17	39928798	39969941	11_H3K27ac_0hour_q0.05_peak_38037_lociStitched
chr2	219122193	219163156	17_H3K27ac_0hour_q0.05_peak_52898_lociStitched
chr2	37862353	37900146	19_H3K27ac_0hour_q0.05_peak_47434_lociStitched
chr16	75321673	75357628	13_H3K27ac_0hour_q0.05_peak_35256_lociStitched
chr8	8990312	9021602	15_H3K27ac_0hour_q0.05_peak_86196_lociStitched
chr16	67246960	67313169	20_H3K27ac_0hour_q0.05_peak_34718_lociStitched
chr10	17241184	17281254	15_H3K27ac_0hour_q0.05_peak_9933_lociStitched
chr6	74404253	74442847	19_H3K27ac_0hour_q0.05_peak_78544_lociStitched
chrX	7000707	7051847	16_H3K27ac_0hour_q0.05_peak_94464_lociStitched
chr12	70984436	71058582	36_H3K27ac_0hour_q0.05_peak_21426_lociStitched
chr15	95828249	95849570	13_H3K27ac_0hour_q0.05_peak_32478_lociStitched
chr10	120992008	121032043	15_H3K27ac_0hour_q0.05_peak_13193_lociStitched
chr16	57661396	57689534	15_H3K27ac_0hour_q0.05_peak_34482_lociStitched
chr19	45089588	45113275	15_H3K27ac_0hour_q0.05_peak_45039_lociStitched
chr6	33538670	33603571	22_H3K27ac_0hour_q0.05_peak_77423_lociStitched
chr1	214568983	214634027	32_H3K27ac_0hour_q0.05_peak_7848_lociStitched
chr2	161061081	161101817	19_H3K27ac_0hour_q0.05_peak_51047_lociStitched
chr20	3747370	3802452	17_H3K27ac_0hour_q0.05_peak_54022_lociStitched
chr6	151176510	151216585	17_H3K27ac_0hour_q0.05_peak_80527_lociStitched
chr1	12185675	12246914	16_H3K27ac_0hour_q0.05_peak_612_lociStitched
chr12	123426739	123469757	18_H3K27ac_0hour_q0.05_peak_23477_lociStitched
chr7	132147684	132188346	8_H3K27ac_0hour_q0.05_peak_85240_lociStitched
chr16	81636372	81669158	19_H3K27ac_0hour_q0.05_peak_35490_lociStitched
chr19	45347670	45394091	17_H3K27ac_0hour_q0.05_peak_45107_lociStitched
chr5	71847469	71861428	8_H3K27ac_0hour_q0.05_peak_72321_lociStitched
chr14	69133088	69170732	9_H3K27ac_0hour_q0.05_peak_27880_lociStitched
chr22	51093653	51138574	13_H3K27ac_0hour_q0.05_peak_59646_lociStitched
chr7	22457400	22492540	14_H3K27ac_0hour_q0.05_peak_81988_lociStitched
chr19	11184167	11211165	14_H3K27ac_0hour_q0.05_peak_43482_lociStitched
chr8	29594242	29632106	22_H3K27ac_0hour_q0.05_peak_87108_lociStitched
chr3	124737909	124782688	15_H3K27ac_0hour_q0.05_peak_63431_lociStitched
chr7	5589207	5649977	17_H3K27ac_0hour_q0.05_peak_81599_lociStitched
chr8	10567748	10588636	12_H3K27ac_0hour_q0.05_peak_86252_lociStitched
chr1	201504156	201540381	19_H3K27ac_0hour_q0.05_peak_7093_lociStitched
chr20	43199656	43245288	26_H3K27ac_0hour_q0.05_peak_55480_lociStitched
chr7	47979715	47991269	10_H3K27ac_0hour_q0.05_peak_83005_lociStitched
chr9	139605388	139623543	11_H3K27ac_0hour_q0.05_peak_94302_lociStitched
chr4	7954955	7989174	9_H3K27ac_0hour_q0.05_peak_66733_lociStitched
chr12	89738278	89748946	6_H3K27ac_0hour_q0.05_peak_21792_lociStitched
chr10	31099731	31111328	9_H3K27ac_0hour_q0.05_peak_10345_lociStitched
chr19	46086846	46120120	16_H3K27ac_0hour_q0.05_peak_45218_lociStitched
chr14	85982318	86002832	8_H3K27ac_0hour_q0.05_peak_28584_lociStitched
chr3	184016262	184056955	14_H3K27ac_0hour_q0.05_peak_65608_lociStitched
chr5	176874613	176944728	21_H3K27ac_0hour_q0.05_peak_75436_lociStitched
chr1	155095632	155113239	14_H3K27ac_0hour_q0.05_peak_5610_lociStitched
chr6	32143344	32165705	11_H3K27ac_0hour_q0.05_peak_77341_lociStitched
chr4	77895498	77945269	21_H3K27ac_0hour_q0.05_peak_68033_lociStitched
chr19	8372102	8432977	22_H3K27ac_0hour_q0.05_peak_43331_lociStitched
chr2	73290608	73340899	23_H3K27ac_0hour_q0.05_peak_48781_lociStitched
chr1	150113101	150136092	15_H3K27ac_0hour_q0.05_peak_5242_lociStitched
chr17	43200452	43249462	13_H3K27ac_0hour_q0.05_peak_38355_lociStitched
chr17	40463893	40505822	17_H3K27ac_0hour_q0.05_peak_38105_lociStitched
chr14	24887230	24912507	12_H3K27ac_0hour_q0.05_peak_26612_lociStitched
chr16	70587130	70624021	8_H3K27ac_0hour_q0.05_peak_35046_lociStitched
chr5	141302540	141349383	17_H3K27ac_0hour_q0.05_peak_74265_lociStitched
chr1	236134736	236174056	14_H3K27ac_0hour_q0.05_peak_8746_lociStitched
chr19	2944384	2983990	18_H3K27ac_0hour_q0.05_peak_42920_lociStitched
chr3	141120516	141146091	15_H3K27ac_0hour_q0.05_peak_63980_lociStitched
chr10	114810240	114853985	13_H3K27ac_0hour_q0.05_peak_13036_lociStitched
chr19	6218745	6279651	19_H3K27ac_0hour_q0.05_peak_43209_lociStitched
chr12	11869677	11923996	26_H3K27ac_0hour_q0.05_peak_19077_lociStitched
chr20	35088927	35128679	20_H3K27ac_0hour_q0.05_peak_55154_lociStitched
chrX	129215289	129269965	24_H3K27ac_0hour_q0.05_peak_96673_lociStitched
chr12	65044385	65100203	20_H3K27ac_0hour_q0.05_peak_21174_lociStitched
chr12	109885372	109916137	6_H3K27ac_0hour_q0.05_peak_22792_lociStitched
chr2	47292664	47317936	10_H3K27ac_0hour_q0.05_peak_47936_lociStitched
chr11	75258859	75278290	7_H3K27ac_0hour_q0.05_peak_16627_lociStitched
chr14	100804321	100853415	25_H3K27ac_0hour_q0.05_peak_29019_lociStitched
chr6	136355572	136399365	19_H3K27ac_0hour_q0.05_peak_79900_lociStitched
chr16	67549518	67606620	20_H3K27ac_0hour_q0.05_peak_34737_lociStitched
chr14	24681725	24713020	13_H3K27ac_0hour_q0.05_peak_26577_lociStitched
chr4	41178339	41219952	25_H3K27ac_0hour_q0.05_peak_67397_lociStitched
chr3	151984264	152053182	24_H3K27ac_0hour_q0.05_peak_64423_lociStitched
chr9	73018763	73037058	7_H3K27ac_0hour_q0.05_peak_91556_lociStitched
chr3	43428624	43461312	20_H3K27ac_0hour_q0.05_peak_61171_lociStitched
chr14	69011094	69046228	16_H3K27ac_0hour_q0.05_peak_27876_lociStitched
chr10	71074971	71123348	18_H3K27ac_0hour_q0.05_peak_11294_lociStitched
chr3	69222914	69270287	29_H3K27ac_0hour_q0.05_peak_62288_lociStitched
chr9	116712546	116721255	8_H3K27ac_0hour_q0.05_peak_92914_lociStitched
chr6	12568137	12609570	20_H3K27ac_0hour_q0.05_peak_76332_lociStitched
chr17_gl000205_random	84369	88108	2_H3K27ac_0hour_q0.05_peak_40644_lociStitched
chr6	167026888	167058095	13_H3K27ac_0hour_q0.05_peak_81185_lociStitched
chr9	134268390	134326750	25_H3K27ac_0hour_q0.05_peak_93973_lociStitched
chr9	134079820	134115797	13_H3K27ac_0hour_q0.05_peak_93944_lociStitched
chr9	140188929	140216706	15_H3K27ac_0hour_q0.05_peak_94369_lociStitched
chr14	91261021	91295179	8_H3K27ac_0hour_q0.05_peak_28717_lociStitched
chr14	73109085	73146872	13_H3K27ac_0hour_q0.05_peak_28094_lociStitched
chr19	56110548	56168318	16_H3K27ac_0hour_q0.05_peak_45953_lociStitched
chr2	46523497	46591037	21_H3K27ac_0hour_q0.05_peak_47859_lociStitched
chr6	44140763	44171457	10_H3K27ac_0hour_q0.05_peak_78019_lociStitched
chr4	5020958	5054094	12_H3K27ac_0hour_q0.05_peak_66564_lociStitched
chr1	61404177	61430383	7_H3K27ac_0hour_q0.05_peak_3186_lociStitched
chr14	61965004	62005163	16_H3K27ac_0hour_q0.05_peak_27600_lociStitched
chr13	40763795	40781880	6_H3K27ac_0hour_q0.05_peak_24500_lociStitched
chr5	17105685	17191626	27_H3K27ac_0hour_q0.05_peak_71009_lociStitched
chr10	102105985	102136303	18_H3K27ac_0hour_q0.05_peak_12650_lociStitched
chr10	124201549	124264218	15_H3K27ac_0hour_q0.05_peak_13386_lociStitched
chr6	3727210	3754862	15_H3K27ac_0hour_q0.05_peak_75819_lociStitched
chr2	43102024	43110392	4_H3K27ac_0hour_q0.05_peak_47592_lociStitched
chr10	123871648	123908939	11_H3K27ac_0hour_q0.05_peak_13344_lociStitched
chr19	13190024	13230259	13_H3K27ac_0hour_q0.05_peak_43675_lociStitched
chr5	177540008	177559523	17_H3K27ac_0hour_q0.05_peak_75473_lociStitched
chr9	116411093	116421331	5_H3K27ac_0hour_q0.05_peak_92893_lociStitched
chr22	41677397	41705928	13_H3K27ac_0hour_q0.05_peak_59218_lociStitched
chr19	1237162	1276733	22_H3K27ac_0hour_q0.05_peak_42721_lociStitched
chr17	899670	909985	6_H3K27ac_0hour_q0.05_peak_36173_lociStitched
chr5	71403229	71475205	29_H3K27ac_0hour_q0.05_peak_72247_lociStitched
chr18	12271389	12327953	13_H3K27ac_0hour_q0.05_peak_41113_lociStitched
chr7	129588309	129624359	9_H3K27ac_0hour_q0.05_peak_85068_lociStitched
chr1	150531069	150553029	11_H3K27ac_0hour_q0.05_peak_5280_lociStitched
chr17	43339285	43419911	23_H3K27ac_0hour_q0.05_peak_38374_lociStitched
chr12	12866474	12894927	15_H3K27ac_0hour_q0.05_peak_19178_lociStitched
chr20	50240433	50279001	13_H3K27ac_0hour_q0.05_peak_56041_lociStitched
chr1	227612124	227635455	11_H3K27ac_0hour_q0.05_peak_8353_lociStitched
chr7	99678282	99701637	11_H3K27ac_0hour_q0.05_peak_84026_lociStitched
chr11	63993236	64053953	21_H3K27ac_0hour_q0.05_peak_15798_lociStitched
chr12	56536814	56557597	10_H3K27ac_0hour_q0.05_peak_20812_lociStitched
chr11	118076430	118148988	23_H3K27ac_0hour_q0.05_peak_17768_lociStitched
chr20	48384571	48408722	11_H3K27ac_0hour_q0.05_peak_55844_lociStitched
chr20	43965612	43992470	12_H3K27ac_0hour_q0.05_peak_55542_lociStitched
chr17	76857594	76881409	8_H3K27ac_0hour_q0.05_peak_40313_lociStitched
chr1	43759305	43771804	6_H3K27ac_0hour_q0.05_peak_2482_lociStitched
chr7	100136173	100157461	6_H3K27ac_0hour_q0.05_peak_84090_lociStitched
chr15	101706941	101742355	17_H3K27ac_0hour_q0.05_peak_32696_lociStitched
chr16	22199607	22232817	12_H3K27ac_0hour_q0.05_peak_33644_lociStitched
chr15	89164017	89203396	17_H3K27ac_0hour_q0.05_peak_32148_lociStitched
chr7	4763804	4792526	10_H3K27ac_0hour_q0.05_peak_81547_lociStitched
chr16	57168100	57198920	14_H3K27ac_0hour_q0.05_peak_34409_lociStitched
chr17	40895944	40936017	13_H3K27ac_0hour_q0.05_peak_38162_lociStitched
chr20	33698631	33736318	17_H3K27ac_0hour_q0.05_peak_55021_lociStitched
chr11	128694949	128729765	14_H3K27ac_0hour_q0.05_peak_18337_lociStitched
chr10	72258036	72279077	10_H3K27ac_0hour_q0.05_peak_11418_lociStitched
chr11	103479379	103513414	17_H3K27ac_0hour_q0.05_peak_17332_lociStitched
chr16	29801224	29837794	13_H3K27ac_0hour_q0.05_peak_33963_lociStitched
chr9	112667839	112686487	9_H3K27ac_0hour_q0.05_peak_92620_lociStitched
chr9	124082195	124133193	29_H3K27ac_0hour_q0.05_peak_93137_lociStitched
chr15	99964585	100048718	15_H3K27ac_0hour_q0.05_peak_32630_lociStitched
chr1	43389590	43425376	11_H3K27ac_0hour_q0.05_peak_2460_lociStitched
chr5	139621162	139649113	18_H3K27ac_0hour_q0.05_peak_74124_lociStitched
chr19	34744749	34773995	14_H3K27ac_0hour_q0.05_peak_44361_lociStitched
chr20	10331038	10357936	11_H3K27ac_0hour_q0.05_peak_54282_lociStitched
chr5	43033397	43044981	7_H3K27ac_0hour_q0.05_peak_71484_lociStitched
chr12	7013618	7080849	20_H3K27ac_0hour_q0.05_peak_18891_lociStitched
chr13	110869127	110919914	29_H3K27ac_0hour_q0.05_peak_26060_lociStitched
chr1	39845039	39877242	21_H3K27ac_0hour_q0.05_peak_2260_lociStitched
chr10	5983182	6019978	9_H3K27ac_0hour_q0.05_peak_9351_lociStitched
chr10	82167009	82189702	6_H3K27ac_0hour_q0.05_peak_11895_lociStitched
chr9	130823601	130867362	18_H3K27ac_0hour_q0.05_peak_93657_lociStitched
chr1	27740766	27763067	13_H3K27ac_0hour_q0.05_peak_1588_lociStitched
chr14	23503136	23549539	15_H3K27ac_0hour_q0.05_peak_26530_lociStitched
chr17	7738325	7762458	9_H3K27ac_0hour_q0.05_peak_36707_lociStitched
chr11	128198064	128213509	8_H3K27ac_0hour_q0.05_peak_18232_lociStitched
chr17	47073288	47113911	21_H3K27ac_0hour_q0.05_peak_38613_lociStitched
chr1	23061916	23082972	11_H3K27ac_0hour_q0.05_peak_1187_lociStitched
chr3	43217800	43238933	13_H3K27ac_0hour_q0.05_peak_61146_lociStitched
chr19	4557524	4584573	14_H3K27ac_0hour_q0.05_peak_43097_lociStitched
chr17	7108338	7169370	19_H3K27ac_0hour_q0.05_peak_36626_lociStitched
chr8	23006927	23040412	12_H3K27ac_0hour_q0.05_peak_86725_lociStitched
chr8	13121794	13134890	12_H3K27ac_0hour_q0.05_peak_86394_lociStitched
chr2	191835104	191862148	13_H3K27ac_0hour_q0.05_peak_51893_lociStitched
chr13	113343837	113378121	13_H3K27ac_0hour_q0.05_peak_26218_lociStitched
chr14	101524343	101544272	12_H3K27ac_0hour_q0.05_peak_29054_lociStitched
chr3	195606422	195637153	13_H3K27ac_0hour_q0.05_peak_66246_lociStitched
chr12	122222161	122251441	22_H3K27ac_0hour_q0.05_peak_23377_lociStitched
chr14	54414360	54430355	6_H3K27ac_0hour_q0.05_peak_27205_lociStitched
chr10	70811698	70863815	17_H3K27ac_0hour_q0.05_peak_11254_lociStitched
chr18	19749017	19778000	17_H3K27ac_0hour_q0.05_peak_41248_lociStitched
chr6	44071347	44096039	15_H3K27ac_0hour_q0.05_peak_77995_lociStitched
chr3	194585981	194606445	7_H3K27ac_0hour_q0.05_peak_66116_lociStitched
chr2	176987505	177006255	12_H3K27ac_0hour_q0.05_peak_51491_lociStitched
chr6	27774937	27807790	15_H3K27ac_0hour_q0.05_peak_77011_lociStitched
chrX	45601863	45668841	41_H3K27ac_0hour_q0.05_peak_95424_lociStitched
chr1	22089692	22110935	13_H3K27ac_0hour_q0.05_peak_1081_lociStitched
chr1	156695804	156722445	7_H3K27ac_0hour_q0.05_peak_5799_lociStitched
chr15	99433198	99468209	10_H3K27ac_0hour_q0.05_peak_32590_lociStitched
chr12	124983193	125009105	12_H3K27ac_0hour_q0.05_peak_23608_lociStitched
chr1	23489795	23525629	11_H3K27ac_0hour_q0.05_peak_1244_lociStitched
chr2	47074205	47109918	11_H3K27ac_0hour_q0.05_peak_47896_lociStitched
chr16	53537513	53554406	8_H3K27ac_0hour_q0.05_peak_34285_lociStitched
chr13	52945760	53030272	32_H3K27ac_0hour_q0.05_peak_25107_lociStitched
chr8	131408908	131435113	12_H3K27ac_0hour_q0.05_peak_89666_lociStitched
chr18	3245690	3264153	10_H3K27ac_0hour_q0.05_peak_40776_lociStitched
chr7_gl000195_random	30165	33813	2_H3K27ac_0hour_q0.05_peak_85983_lociStitched
chr12	13247313	13255668	4_H3K27ac_0hour_q0.05_peak_19266_lociStitched
chr12	8827164	8866703	18_H3K27ac_0hour_q0.05_peak_18950_lociStitched
chr18	7367062	7380710	4_H3K27ac_0hour_q0.05_peak_40882_lociStitched
chr6	31760284	31804689	13_H3K27ac_0hour_q0.05_peak_77310_lociStitched
chr6	31697136	31708779	4_H3K27ac_0hour_q0.05_peak_77305_lociStitched
chr19	48216666	48249630	15_H3K27ac_0hour_q0.05_peak_45452_lociStitched
chr7	150776937	150811671	14_H3K27ac_0hour_q0.05_peak_85796_lociStitched
chr20	20710700	20747435	13_H3K27ac_0hour_q0.05_peak_54543_lociStitched
chr1	55775465	55800933	12_H3K27ac_0hour_q0.05_peak_2959_lociStitched
chr1	156629115	156647997	13_H3K27ac_0hour_q0.05_peak_5782_lociStitched
chr7	33756834	33783103	9_H3K27ac_0hour_q0.05_peak_82507_lociStitched
chr15	75315902	75347851	11_H3K27ac_0hour_q0.05_peak_31716_lociStitched
chr3	49376703	49398221	15_H3K27ac_0hour_q0.05_peak_61537_lociStitched
chr10	88708413	88731658	9_H3K27ac_0hour_q0.05_peak_12000_lociStitched
chr19	1094321	1133176	13_H3K27ac_0hour_q0.05_peak_42691_lociStitched
chr9	90106275	90147031	19_H3K27ac_0hour_q0.05_peak_91998_lociStitched
chr6	32935024	32941635	6_H3K27ac_0hour_q0.05_peak_77373_lociStitched
chr5	56730145	56748160	11_H3K27ac_0hour_q0.05_peak_71786_lociStitched
chr6	6651913	6698112	12_H3K27ac_0hour_q0.05_peak_75985_lociStitched
chr12	121607774	121653467	16_H3K27ac_0hour_q0.05_peak_23303_lociStitched
chr20	30129896	30162341	16_H3K27ac_0hour_q0.05_peak_54737_lociStitched
chr3	170443722	170478332	20_H3K27ac_0hour_q0.05_peak_65049_lociStitched
chr5	66123894	66161004	13_H3K27ac_0hour_q0.05_peak_72085_lociStitched
chr17	78723616	78767871	14_H3K27ac_0hour_q0.05_peak_40396_lociStitched
chr8	145002338	145031640	19_H3K27ac_0hour_q0.05_peak_90084_lociStitched
chr3	49840121	49851812	3_H3K27ac_0hour_q0.05_peak_61574_lociStitched
chr14	78046763	78083054	17_H3K27ac_0hour_q0.05_peak_28480_lociStitched
chr1	160965322	160991683	14_H3K27ac_0hour_q0.05_peak_5940_lociStitched
chr14	62027028	62037154	9_H3K27ac_0hour_q0.05_peak_27606_lociStitched
chr10	121060202	121080645	7_H3K27ac_0hour_q0.05_peak_13212_lociStitched
chr6	34190781	34217679	13_H3K27ac_0hour_q0.05_peak_77471_lociStitched
chr12	53432296	53473873	10_H3K27ac_0hour_q0.05_peak_20630_lociStitched
chr2	201606492	201654492	20_H3K27ac_0hour_q0.05_peak_52160_lociStitched
chr2	55303585	55361671	26_H3K27ac_0hour_q0.05_peak_48121_lociStitched
chr2	96907409	96933334	17_H3K27ac_0hour_q0.05_peak_49212_lociStitched
chr3	128199032	128211165	3_H3K27ac_0hour_q0.05_peak_63562_lociStitched
chr1	8908590	8940941	20_H3K27ac_0hour_q0.05_peak_406_lociStitched
chr18	57540073	57585815	15_H3K27ac_0hour_q0.05_peak_42239_lociStitched
chr15	90901980	90984685	28_H3K27ac_0hour_q0.05_peak_32324_lociStitched
chr3	14844219	14866098	6_H3K27ac_0hour_q0.05_peak_60164_lociStitched
chr1	68295598	68322288	12_H3K27ac_0hour_q0.05_peak_3541_lociStitched
chr10	15237225	15265857	13_H3K27ac_0hour_q0.05_peak_9817_lociStitched
chr2	43445271	43456511	6_H3K27ac_0hour_q0.05_peak_47655_lociStitched
chr3	129200752	129219984	8_H3K27ac_0hour_q0.05_peak_63659_lociStitched
chr10	75757206	75841225	33_H3K27ac_0hour_q0.05_peak_11630_lociStitched
chr9	131889055	131911815	7_H3K27ac_0hour_q0.05_peak_93777_lociStitched
chr20	48701581	48733127	16_H3K27ac_0hour_q0.05_peak_55881_lociStitched
chr20	57579815	57618332	13_H3K27ac_0hour_q0.05_peak_56284_lociStitched
chr10	74001653	74037271	16_H3K27ac_0hour_q0.05_peak_11497_lociStitched
chr10	30069473	30101559	15_H3K27ac_0hour_q0.05_peak_10229_lociStitched
chr2	109853220	109896762	15_H3K27ac_0hour_q0.05_peak_49764_lociStitched
chr18	20834803	20863724	9_H3K27ac_0hour_q0.05_peak_41341_lociStitched
chr17	25646287	25682960	19_H3K27ac_0hour_q0.05_peak_37238_lociStitched
chr5	73925225	73943061	8_H3K27ac_0hour_q0.05_peak_72499_lociStitched
chr17	45370795	45413884	13_H3K27ac_0hour_q0.05_peak_38474_lociStitched
chr19	48743079	48775178	22_H3K27ac_0hour_q0.05_peak_45499_lociStitched
chr3	177058287	177079150	9_H3K27ac_0hour_q0.05_peak_65369_lociStitched
chr11	75523260	75541054	15_H3K27ac_0hour_q0.05_peak_16644_lociStitched
chrX	153940767	153992293	19_H3K27ac_0hour_q0.05_peak_97101_lociStitched
chr7	22686170	22717342	19_H3K27ac_0hour_q0.05_peak_82034_lociStitched
chr21	38994954	39047634	19_H3K27ac_0hour_q0.05_peak_57100_lociStitched
chr11	10589865	10613493	10_H3K27ac_0hour_q0.05_peak_14244_lociStitched
chr17	66031804	66067465	14_H3K27ac_0hour_q0.05_peak_39632_lociStitched
chr19	3129432	3161697	9_H3K27ac_0hour_q0.05_peak_42949_lociStitched
chr16	14134611	14166073	12_H3K27ac_0hour_q0.05_peak_33302_lociStitched
chr22	20849167	20887553	15_H3K27ac_0hour_q0.05_peak_57815_lociStitched
chr20	47432722	47463848	14_H3K27ac_0hour_q0.05_peak_55766_lociStitched
chr20	46904854	46928007	16_H3K27ac_0hour_q0.05_peak_55707_lociStitched
chr11	57172901	57195053	9_H3K27ac_0hour_q0.05_peak_15393_lociStitched
chr11	61732913	61747287	7_H3K27ac_0hour_q0.05_peak_15631_lociStitched
chr5	16690553	16750394	24_H3K27ac_0hour_q0.05_peak_70928_lociStitched
chr16	27314931	27359436	18_H3K27ac_0hour_q0.05_peak_33820_lociStitched
chr1	181047036	181082817	16_H3K27ac_0hour_q0.05_peak_6640_lociStitched
chr19	41255607	41285266	10_H3K27ac_0hour_q0.05_peak_44821_lociStitched
chr20	60924961	60962911	13_H3K27ac_0hour_q0.05_peak_56328_lociStitched
chr10	33268713	33299461	15_H3K27ac_0hour_q0.05_peak_10505_lociStitched
chr16	86588270	86624631	15_H3K27ac_0hour_q0.05_peak_35757_lociStitched
chr21	45540669	45586320	12_H3K27ac_0hour_q0.05_peak_57443_lociStitched
chr2	192696008	192734241	24_H3K27ac_0hour_q0.05_peak_51947_lociStitched
chr14	100196526	100225411	13_H3K27ac_0hour_q0.05_peak_28985_lociStitched
chr13	30089016	30153259	27_H3K27ac_0hour_q0.05_peak_24150_lociStitched
chr6	86092065	86116619	9_H3K27ac_0hour_q0.05_peak_78838_lociStitched
chr6	148610383	148669226	20_H3K27ac_0hour_q0.05_peak_80348_lociStitched
chr1	19756144	19813201	25_H3K27ac_0hour_q0.05_peak_935_lociStitched
chr5	169559172	169579726	8_H3K27ac_0hour_q0.05_peak_75149_lociStitched
chr1	68638465	68647533	7_H3K27ac_0hour_q0.05_peak_3567_lociStitched
chr20	270092	310628	18_H3K27ac_0hour_q0.05_peak_53794_lociStitched
chr8	67383093	67485285	24_H3K27ac_0hour_q0.05_peak_88061_lociStitched
chr2	10521483	10549380	11_H3K27ac_0hour_q0.05_peak_46350_lociStitched
chr17	40253812	40291110	7_H3K27ac_0hour_q0.05_peak_38061_lociStitched
chr12	32576064	32668382	32_H3K27ac_0hour_q0.05_peak_19881_lociStitched
chr3	196336727	196379098	12_H3K27ac_0hour_q0.05_peak_66276_lociStitched
chr14	100029751	100090269	25_H3K27ac_0hour_q0.05_peak_28952_lociStitched
chr21	33888644	33898468	4_H3K27ac_0hour_q0.05_peak_56802_lociStitched
chr1	226986484	227016184	12_H3K27ac_0hour_q0.05_peak_8317_lociStitched
chr11	6623180	6640990	14_H3K27ac_0hour_q0.05_peak_13965_lociStitched
chr11	33951136	33978943	8_H3K27ac_0hour_q0.05_peak_14895_lociStitched
chr4	16846788	16877443	12_H3K27ac_0hour_q0.05_peak_66925_lociStitched
chr12	31868207	31910076	15_H3K27ac_0hour_q0.05_peak_19807_lociStitched
chr1	113382482	113424251	17_H3K27ac_0hour_q0.05_peak_4857_lociStitched
chr9	14312393	14323286	6_H3K27ac_0hour_q0.05_peak_90562_lociStitched
chr17	74684523	74734568	18_H3K27ac_0hour_q0.05_peak_40046_lociStitched
chr11	65404996	65432062	10_H3K27ac_0hour_q0.05_peak_15971_lociStitched
chr22	37572156	37596147	9_H3K27ac_0hour_q0.05_peak_58860_lociStitched
chr7	93539449	93589067	22_H3K27ac_0hour_q0.05_peak_83854_lociStitched
chr2	112811480	112855380	24_H3K27ac_0hour_q0.05_peak_49997_lociStitched
chr6	144663980	144698975	13_H3K27ac_0hour_q0.05_peak_80245_lociStitched
chr22	19542281	19595574	15_H3K27ac_0hour_q0.05_peak_57724_lociStitched
chr12	124906552	124951521	11_H3K27ac_0hour_q0.05_peak_23587_lociStitched
chr19	3423265	3461049	15_H3K27ac_0hour_q0.05_peak_42975_lociStitched
chr10	3493567	3514899	9_H3K27ac_0hour_q0.05_peak_9136_lociStitched
chr9	137257332	137307168	23_H3K27ac_0hour_q0.05_peak_94175_lociStitched
chr15	90561845	90583766	8_H3K27ac_0hour_q0.05_peak_32258_lociStitched
chr1	8173440	8199054	12_H3K27ac_0hour_q0.05_peak_305_lociStitched
chr16	87978860	88001024	10_H3K27ac_0hour_q0.05_peak_35898_lociStitched
chr3	193972027	193995895	13_H3K27ac_0hour_q0.05_peak_66034_lociStitched
chr17	66286829	66320756	11_H3K27ac_0hour_q0.05_peak_39645_lociStitched
chr3	42138797	42165562	11_H3K27ac_0hour_q0.05_peak_61093_lociStitched
chr2	70345880	70371089	8_H3K27ac_0hour_q0.05_peak_48643_lociStitched
chr7	143068832	143093321	13_H3K27ac_0hour_q0.05_peak_85624_lociStitched
chr12	66234626	66294432	23_H3K27ac_0hour_q0.05_peak_21280_lociStitched
chr1	59039599	59059521	10_H3K27ac_0hour_q0.05_peak_3015_lociStitched
chr2	70297560	70323189	9_H3K27ac_0hour_q0.05_peak_48634_lociStitched
chr16	70457051	70473750	7_H3K27ac_0hour_q0.05_peak_35033_lociStitched
chr7	4721441	4748419	14_H3K27ac_0hour_q0.05_peak_81530_lociStitched
chr5	148923268	148944428	10_H3K27ac_0hour_q0.05_peak_74650_lociStitched
chr2	86244711	86273685	7_H3K27ac_0hour_q0.05_peak_49057_lociStitched
chr9	33129635	33173359	17_H3K27ac_0hour_q0.05_peak_91013_lociStitched
chr12	118099886	118126719	10_H3K27ac_0hour_q0.05_peak_23128_lociStitched
chr1	151932637	151967748	16_H3K27ac_0hour_q0.05_peak_5419_lociStitched
chr17	48120812	48143827	14_H3K27ac_0hour_q0.05_peak_38705_lociStitched
chr1	228269468	228298267	13_H3K27ac_0hour_q0.05_peak_8376_lociStitched
chr6	36696707	36739074	10_H3K27ac_0hour_q0.05_peak_77667_lociStitched
chr12	12955372	12977143	12_H3K27ac_0hour_q0.05_peak_19216_lociStitched
chr19	47728755	47761768	14_H3K27ac_0hour_q0.05_peak_45404_lociStitched
chr1	11967851	11995742	11_H3K27ac_0hour_q0.05_peak_593_lociStitched
chr1	90348937	90374783	17_H3K27ac_0hour_q0.05_peak_4061_lociStitched
chr1	27435582	27488618	14_H3K27ac_0hour_q0.05_peak_1562_lociStitched
chr11	75173034	75187390	5_H3K27ac_0hour_q0.05_peak_16611_lociStitched
chr3	52270713	52334591	19_H3K27ac_0hour_q0.05_peak_61710_lociStitched
chr13	41130979	41166121	24_H3K27ac_0hour_q0.05_peak_24563_lociStitched
chr1	159879721	159895842	7_H3K27ac_0hour_q0.05_peak_5917_lociStitched
chrX	13084958	13143633	33_H3K27ac_0hour_q0.05_peak_94664_lociStitched
chr10	44342025	44364512	10_H3K27ac_0hour_q0.05_peak_10793_lociStitched
chr10	130833047	130847537	11_H3K27ac_0hour_q0.05_peak_13606_lociStitched
chr20	33890618	33917380	21_H3K27ac_0hour_q0.05_peak_55065_lociStitched
chr11	45663411	45686865	14_H3K27ac_0hour_q0.05_peak_15165_lociStitched
chr12	6641188	6678175	16_H3K27ac_0hour_q0.05_peak_18823_lociStitched
chr8	129030756	129078205	21_H3K27ac_0hour_q0.05_peak_89530_lociStitched
chr1	15655047	15683570	11_H3K27ac_0hour_q0.05_peak_692_lociStitched
chr22	50549848	50559595	5_H3K27ac_0hour_q0.05_peak_59592_lociStitched
chr3	41010619	41019804	5_H3K27ac_0hour_q0.05_peak_61047_lociStitched
chr17	41654517	41688312	7_H3K27ac_0hour_q0.05_peak_38236_lociStitched
chr14	63641717	63695714	22_H3K27ac_0hour_q0.05_peak_27648_lociStitched
chr2	47258507	47276400	8_H3K27ac_0hour_q0.05_peak_47919_lociStitched
chr22	29976379	30031228	23_H3K27ac_0hour_q0.05_peak_58432_lociStitched
chr6	7726337	7771100	18_H3K27ac_0hour_q0.05_peak_76030_lociStitched
chr18	74766206	74827485	12_H3K27ac_0hour_q0.05_peak_42552_lociStitched
chr13	113199701	113243347	21_H3K27ac_0hour_q0.05_peak_26199_lociStitched
chr6	114175726	114200942	5_H3K27ac_0hour_q0.05_peak_79410_lociStitched
chr3	37932564	38008826	23_H3K27ac_0hour_q0.05_peak_60906_lociStitched
chr10	30926943	30941230	12_H3K27ac_0hour_q0.05_peak_10321_lociStitched
chr3	183265560	183305687	12_H3K27ac_0hour_q0.05_peak_65552_lociStitched
chr22	30782638	30841244	18_H3K27ac_0hour_q0.05_peak_58486_lociStitched
chr12	109058265	109096604	22_H3K27ac_0hour_q0.05_peak_22728_lociStitched
chr10	124058508	124072128	8_H3K27ac_0hour_q0.05_peak_13362_lociStitched
chr9	123687072	123714778	14_H3K27ac_0hour_q0.05_peak_93072_lociStitched
chr8	55237647	55252185	9_H3K27ac_0hour_q0.05_peak_87842_lociStitched
chr11	122561234	122630453	25_H3K27ac_0hour_q0.05_peak_18044_lociStitched
chr10	16986404	17012438	8_H3K27ac_0hour_q0.05_peak_9882_lociStitched
chr15	67286205	67342372	16_H3K27ac_0hour_q0.05_peak_31216_lociStitched
chr13	28953108	28997444	22_H3K27ac_0hour_q0.05_peak_24073_lociStitched
chr5	39501512	39548403	15_H3K27ac_0hour_q0.05_peak_71403_lociStitched
chr19	1840652	1906497	23_H3K27ac_0hour_q0.05_peak_42771_lociStitched
chr1	77971122	78003254	14_H3K27ac_0hour_q0.05_peak_3678_lociStitched
chr9	133709318	133736687	16_H3K27ac_0hour_q0.05_peak_93914_lociStitched
chr19	18111044	18140782	14_H3K27ac_0hour_q0.05_peak_44064_lociStitched
chr9	125007915	125028144	15_H3K27ac_0hour_q0.05_peak_93210_lociStitched
chr5	14423685	14480242	24_H3K27ac_0hour_q0.05_peak_70843_lociStitched
chr19	35475826	35513459	20_H3K27ac_0hour_q0.05_peak_44418_lociStitched
chr19	19077327	19110356	9_H3K27ac_0hour_q0.05_peak_44191_lociStitched
chr8	37937986	37964702	7_H3K27ac_0hour_q0.05_peak_87333_lociStitched
chr15	59566312	59598222	12_H3K27ac_0hour_q0.05_peak_30687_lociStitched
chr8	22446808	22463544	5_H3K27ac_0hour_q0.05_peak_86673_lociStitched
chr1	16263385	16302811	11_H3K27ac_0hour_q0.05_peak_765_lociStitched
chr6	18361935	18410917	28_H3K27ac_0hour_q0.05_peak_76638_lociStitched
chr3	129097394	129118933	7_H3K27ac_0hour_q0.05_peak_63637_lociStitched
chr10	49787396	49833145	7_H3K27ac_0hour_q0.05_peak_10885_lociStitched
chr17	7442573	7492011	17_H3K27ac_0hour_q0.05_peak_36685_lociStitched
chr15	42782214	42797658	16_H3K27ac_0hour_q0.05_peak_30010_lociStitched
chr2	46385356	46428531	10_H3K27ac_0hour_q0.05_peak_47830_lociStitched
chr13	32828038	32860782	14_H3K27ac_0hour_q0.05_peak_24252_lociStitched
chr16	81400831	81441450	12_H3K27ac_0hour_q0.05_peak_35436_lociStitched
chr2	109779450	109802836	12_H3K27ac_0hour_q0.05_peak_49747_lociStitched
chr6	2764398	2821940	22_H3K27ac_0hour_q0.05_peak_75732_lociStitched
chr19	4624670	4650732	12_H3K27ac_0hour_q0.05_peak_43100_lociStitched
chr19	17650335	17686776	11_H3K27ac_0hour_q0.05_peak_44049_lociStitched
chr17	80476709	80496735	9_H3K27ac_0hour_q0.05_peak_40579_lociStitched
chrX	15510063	15550072	32_H3K27ac_0hour_q0.05_peak_94775_lociStitched
chr2	1688673	1760542	21_H3K27ac_0hour_q0.05_peak_46131_lociStitched
chr11	122024103	122086212	31_H3K27ac_0hour_q0.05_peak_17991_lociStitched
chr1	153917271	153963942	14_H3K27ac_0hour_q0.05_peak_5499_lociStitched
chr16	86694709	86716009	10_H3K27ac_0hour_q0.05_peak_35778_lociStitched
chr10	6145983	6215648	19_H3K27ac_0hour_q0.05_peak_9362_lociStitched
chr8	12967140	12991664	22_H3K27ac_0hour_q0.05_peak_86353_lociStitched
chr9	132244123	132269768	12_H3K27ac_0hour_q0.05_peak_93811_lociStitched
chr3	169375815	169386920	8_H3K27ac_0hour_q0.05_peak_64977_lociStitched
chr2	136993212	137009987	7_H3K27ac_0hour_q0.05_peak_50516_lociStitched
chr1	225923996	225967190	10_H3K27ac_0hour_q0.05_peak_8236_lociStitched
chr3	134027445	134046778	6_H3K27ac_0hour_q0.05_peak_63828_lociStitched
chr15	22891727	22940678	19_H3K27ac_0hour_q0.05_peak_29347_lociStitched
chr8	94885516	94930802	21_H3K27ac_0hour_q0.05_peak_88483_lociStitched
chr3	52522948	52534735	7_H3K27ac_0hour_q0.05_peak_61737_lociStitched
chr7	44645519	44680692	15_H3K27ac_0hour_q0.05_peak_82886_lociStitched
chr19	13874804	13909017	18_H3K27ac_0hour_q0.05_peak_43710_lociStitched
chr11	69257066	69266315	4_H3K27ac_0hour_q0.05_peak_16256_lociStitched
chr10	3846402	3854337	5_H3K27ac_0hour_q0.05_peak_9166_lociStitched
chr16	57278553	57318922	12_H3K27ac_0hour_q0.05_peak_34431_lociStitched
chr19	49216948	49264320	12_H3K27ac_0hour_q0.05_peak_45566_lociStitched
chr6	16318880	16353451	13_H3K27ac_0hour_q0.05_peak_76501_lociStitched
chr1	59582884	59639905	17_H3K27ac_0hour_q0.05_peak_3123_lociStitched
chr1	113240911	113250589	3_H3K27ac_0hour_q0.05_peak_4852_lociStitched
chr15	72514637	72530663	11_H3K27ac_0hour_q0.05_peak_31558_lociStitched
chr9	116975971	116989787	8_H3K27ac_0hour_q0.05_peak_92948_lociStitched
chr3	120128967	120170730	19_H3K27ac_0hour_q0.05_peak_63224_lociStitched
chr12	50578097	50618696	24_H3K27ac_0hour_q0.05_peak_20407_lociStitched
chr18	22806389	22833359	18_H3K27ac_0hour_q0.05_peak_41445_lociStitched
chr3	52079497	52091861	8_H3K27ac_0hour_q0.05_peak_61678_lociStitched
chr1	209995813	210017960	12_H3K27ac_0hour_q0.05_peak_7697_lociStitched
chr9	114683658	114724715	23_H3K27ac_0hour_q0.05_peak_92741_lociStitched
chr2	47167729	47214364	13_H3K27ac_0hour_q0.05_peak_47908_lociStitched
chr16	89425957	89493008	29_H3K27ac_0hour_q0.05_peak_36015_lociStitched
chr19	13840399	13860101	7_H3K27ac_0hour_q0.05_peak_43698_lociStitched
chr6	17816145	17870201	25_H3K27ac_0hour_q0.05_peak_76583_lociStitched
chr2	20638872	20652806	7_H3K27ac_0hour_q0.05_peak_46653_lociStitched
chr12	48134708	48176896	14_H3K27ac_0hour_q0.05_peak_20189_lociStitched
chr13	114822220	114838335	5_H3K27ac_0hour_q0.05_peak_26293_lociStitched
chr20	342865	362504	8_H3K27ac_0hour_q0.05_peak_53818_lociStitched
chr7	104643699	104656322	6_H3K27ac_0hour_q0.05_peak_84286_lociStitched
chr21	38729494	38748521	12_H3K27ac_0hour_q0.05_peak_57073_lociStitched
chr20	19782865	19830395	22_H3K27ac_0hour_q0.05_peak_54482_lociStitched
chr6	126101795	126161950	21_H3K27ac_0hour_q0.05_peak_79584_lociStitched
chr2	65269751	65309866	15_H3K27ac_0hour_q0.05_peak_48439_lociStitched
chr22	43317338	43357182	13_H3K27ac_0hour_q0.05_peak_59340_lociStitched
chr3	170028185	170097787	27_H3K27ac_0hour_q0.05_peak_65028_lociStitched
chr2	11883300	11919868	19_H3K27ac_0hour_q0.05_peak_46425_lociStitched
chr15	89630295	89692070	25_H3K27ac_0hour_q0.05_peak_32178_lociStitched
chr8	11702479	11749615	16_H3K27ac_0hour_q0.05_peak_86320_lociStitched
chr16	1577254	1600564	6_H3K27ac_0hour_q0.05_peak_32825_lociStitched
chr1	90156225	90194457	24_H3K27ac_0hour_q0.05_peak_4036_lociStitched
chr4	2795383	2820654	13_H3K27ac_0hour_q0.05_peak_66465_lociStitched
chr6	90006488	90035742	8_H3K27ac_0hour_q0.05_peak_78896_lociStitched
chr18	20882010	20893352	8_H3K27ac_0hour_q0.05_peak_41348_lociStitched
chr16	69401735	69478510	26_H3K27ac_0hour_q0.05_peak_34937_lociStitched
chr1	16693677	16724072	14_H3K27ac_0hour_q0.05_peak_810_lociStitched
chr6	121825858	121845671	12_H3K27ac_0hour_q0.05_peak_79519_lociStitched
chr6	30558473	30595419	10_H3K27ac_0hour_q0.05_peak_77162_lociStitched
chr11	72878214	72910788	7_H3K27ac_0hour_q0.05_peak_16414_lociStitched
chr19	40909691	40951122	14_H3K27ac_0hour_q0.05_peak_44776_lociStitched
chr13	60032706	60073157	17_H3K27ac_0hour_q0.05_peak_25176_lociStitched
chr1	205253154	205290896	13_H3K27ac_0hour_q0.05_peak_7400_lociStitched
chr11	95932289	96000966	23_H3K27ac_0hour_q0.05_peak_17198_lociStitched
chr3	71083957	71116454	20_H3K27ac_0hour_q0.05_peak_62395_lociStitched
chr2	231265374	231283719	9_H3K27ac_0hour_q0.05_peak_53210_lociStitched
chr18	77244376	77269121	4_H3K27ac_0hour_q0.05_peak_42591_lociStitched
chr2	217340336	217364877	13_H3K27ac_0hour_q0.05_peak_52797_lociStitched
chr12	104671032	104711941	19_H3K27ac_0hour_q0.05_peak_22519_lociStitched
chr2	120995173	121027157	15_H3K27ac_0hour_q0.05_peak_50165_lociStitched
chr2	218751281	218808730	18_H3K27ac_0hour_q0.05_peak_52850_lociStitched
chr7	104601517	104629915	12_H3K27ac_0hour_q0.05_peak_84274_lociStitched
chr7	1543261	1578480	9_H3K27ac_0hour_q0.05_peak_81394_lociStitched
chr1	207976934	208006667	13_H3K27ac_0hour_q0.05_peak_7543_lociStitched
chrX	67892320	67929613	17_H3K27ac_0hour_q0.05_peak_95905_lociStitched
chr5	180668364	180689288	6_H3K27ac_0hour_q0.05_peak_75620_lociStitched
chr7	97870436	97882271	5_H3K27ac_0hour_q0.05_peak_83942_lociStitched
chr18	8728995	8752196	16_H3K27ac_0hour_q0.05_peak_40922_lociStitched
chr8	131448938	131465312	8_H3K27ac_0hour_q0.05_peak_89682_lociStitched
chr11	6339966	6350017	7_H3K27ac_0hour_q0.05_peak_13943_lociStitched
chr14	51853243	51866024	9_H3K27ac_0hour_q0.05_peak_27070_lociStitched
chr3	194352443	194365576	8_H3K27ac_0hour_q0.05_peak_66069_lociStitched
chr4	38661149	38690727	14_H3K27ac_0hour_q0.05_peak_67255_lociStitched
chr4	37644249	37688776	16_H3K27ac_0hour_q0.05_peak_67183_lociStitched
chr11	19385080	19402688	10_H3K27ac_0hour_q0.05_peak_14611_lociStitched
chr8	131489389	131541459	20_H3K27ac_0hour_q0.05_peak_89699_lociStitched
chr1	8433484	8485411	18_H3K27ac_0hour_q0.05_peak_335_lociStitched
chr17	47269061	47295284	10_H3K27ac_0hour_q0.05_peak_38636_lociStitched
chr19	47215433	47235795	16_H3K27ac_0hour_q0.05_peak_45314_lociStitched
chr1	41326775	41345946	8_H3K27ac_0hour_q0.05_peak_2349_lociStitched
chr3	145843178	145897021	16_H3K27ac_0hour_q0.05_peak_64105_lociStitched
chr5	151118960	151152984	9_H3K27ac_0hour_q0.05_peak_74828_lociStitched
chr1	68078548	68097054	10_H3K27ac_0hour_q0.05_peak_3472_lociStitched
chr1	12655614	12679964	8_H3K27ac_0hour_q0.05_peak_658_lociStitched
chr12	46761596	46785152	10_H3K27ac_0hour_q0.05_peak_20105_lociStitched
chr2	204973218	204982418	10_H3K27ac_0hour_q0.05_peak_52372_lociStitched
chr3	30551634	30592946	24_H3K27ac_0hour_q0.05_peak_60582_lociStitched
chr3	193851373	193866401	8_H3K27ac_0hour_q0.05_peak_66012_lociStitched
chr20	42567242	42588456	9_H3K27ac_0hour_q0.05_peak_55445_lociStitched
chr12	706826	756630	15_H3K27ac_0hour_q0.05_peak_18505_lociStitched
chr10	30471516	30527792	12_H3K27ac_0hour_q0.05_peak_10293_lociStitched
chr4	141143677	141198599	14_H3K27ac_0hour_q0.05_peak_69447_lociStitched
chr6	37204535	37227041	11_H3K27ac_0hour_q0.05_peak_77722_lociStitched
chr16	87490580	87500788	6_H3K27ac_0hour_q0.05_peak_35855_lociStitched
chr11	61638178	61658941	12_H3K27ac_0hour_q0.05_peak_15618_lociStitched
chr11	71777447	71793532	12_H3K27ac_0hour_q0.05_peak_16355_lociStitched
chr14	61644090	61656303	8_H3K27ac_0hour_q0.05_peak_27514_lociStitched
chr11	76374829	76384538	4_H3K27ac_0hour_q0.05_peak_16705_lociStitched
chrX	99890634	99940765	16_H3K27ac_0hour_q0.05_peak_96177_lociStitched
chr17	27894582	27923185	10_H3K27ac_0hour_q0.05_peak_37438_lociStitched
chr2	151320085	151344227	17_H3K27ac_0hour_q0.05_peak_50720_lociStitched
chr4	87845195	87899690	16_H3K27ac_0hour_q0.05_peak_68320_lociStitched
chr7	116502600	116528876	20_H3K27ac_0hour_q0.05_peak_84852_lociStitched
chr3	56933683	56965434	15_H3K27ac_0hour_q0.05_peak_61844_lociStitched
chr9	27108781	27129842	11_H3K27ac_0hour_q0.05_peak_90938_lociStitched
chr7	640920	659804	5_H3K27ac_0hour_q0.05_peak_81323_lociStitched
chr3	111564796	111593501	16_H3K27ac_0hour_q0.05_peak_62939_lociStitched
chr6	128808425	128842532	15_H3K27ac_0hour_q0.05_peak_79638_lociStitched
chr17	5993600	6014801	8_H3K27ac_0hour_q0.05_peak_36560_lociStitched
chr10	3918858	3940107	12_H3K27ac_0hour_q0.05_peak_9182_lociStitched
chr15	90337521	90367169	17_H3K27ac_0hour_q0.05_peak_32218_lociStitched
chr15	63172200	63192589	10_H3K27ac_0hour_q0.05_peak_30828_lociStitched
chr3	149050609	149070795	15_H3K27ac_0hour_q0.05_peak_64180_lociStitched
chr1	27094399	27126937	7_H3K27ac_0hour_q0.05_peak_1522_lociStitched
chr13	45491646	45508943	8_H3K27ac_0hour_q0.05_peak_24788_lociStitched
chr17	26661505	26724059	20_H3K27ac_0hour_q0.05_peak_37327_lociStitched
chr9	131312514	131338333	16_H3K27ac_0hour_q0.05_peak_93722_lociStitched
chr10	35657734	35683843	9_H3K27ac_0hour_q0.05_peak_10670_lociStitched
chr22	23619060	23653019	15_H3K27ac_0hour_q0.05_peak_57932_lociStitched
chr18	46345559	46378833	15_H3K27ac_0hour_q0.05_peak_41809_lociStitched
chr19	6056419	6067775	8_H3K27ac_0hour_q0.05_peak_43184_lociStitched
chr2	28805715	28845285	13_H3K27ac_0hour_q0.05_peak_47025_lociStitched
chr6	21587062	21599511	5_H3K27ac_0hour_q0.05_peak_76727_lociStitched
chr8	27523901	27581143	16_H3K27ac_0hour_q0.05_peak_86947_lociStitched
chr12	121114627	121149211	10_H3K27ac_0hour_q0.05_peak_23262_lociStitched
chr7	56100965	56133126	12_H3K27ac_0hour_q0.05_peak_83203_lociStitched
chr20	10633250	10655946	8_H3K27ac_0hour_q0.05_peak_54307_lociStitched
chr7	1083097	1100854	7_H3K27ac_0hour_q0.05_peak_81354_lociStitched
chr12	122489350	122527250	8_H3K27ac_0hour_q0.05_peak_23391_lociStitched
chr19	3359626	3406118	15_H3K27ac_0hour_q0.05_peak_42968_lociStitched
chr19	47609568	47617681	7_H3K27ac_0hour_q0.05_peak_45357_lociStitched
chr19	19555300	19601309	11_H3K27ac_0hour_q0.05_peak_44219_lociStitched
chr12	116813873	116827855	5_H3K27ac_0hour_q0.05_peak_23091_lociStitched
chr19	45213438	45228019	6_H3K27ac_0hour_q0.05_peak_45079_lociStitched
chr3	128724057	128746475	6_H3K27ac_0hour_q0.05_peak_63594_lociStitched
chr13	29014130	29069900	21_H3K27ac_0hour_q0.05_peak_24090_lociStitched
chr10	104989225	105001934	3_H3K27ac_0hour_q0.05_peak_12814_lociStitched
chr14	61567603	61571892	3_H3K27ac_0hour_q0.05_peak_27503_lociStitched
chr11	133986909	134009815	10_H3K27ac_0hour_q0.05_peak_18464_lociStitched
chr20	62476197	62506213	11_H3K27ac_0hour_q0.05_peak_56419_lociStitched
chr11	47257537	47291921	13_H3K27ac_0hour_q0.05_peak_15246_lociStitched
chr4	40991991	41032319	17_H3K27ac_0hour_q0.05_peak_67371_lociStitched
chr19	49977173	50032307	19_H3K27ac_0hour_q0.05_peak_45618_lociStitched
chr4	25451771	25469976	5_H3K27ac_0hour_q0.05_peak_67089_lociStitched
chr19	2455624	2508126	19_H3K27ac_0hour_q0.05_peak_42872_lociStitched
chr20	62312781	62340369	10_H3K27ac_0hour_q0.05_peak_56393_lociStitched
chr2	43301221	43314801	6_H3K27ac_0hour_q0.05_peak_47625_lociStitched
chr16	2200939	2222336	9_H3K27ac_0hour_q0.05_peak_32889_lociStitched
chr17	17726551	17753510	6_H3K27ac_0hour_q0.05_peak_37042_lociStitched
chr2	109938202	109969197	15_H3K27ac_0hour_q0.05_peak_49782_lociStitched
chr18	20804878	20819438	7_H3K27ac_0hour_q0.05_peak_41333_lociStitched
chr14	91076830	91091797	6_H3K27ac_0hour_q0.05_peak_28702_lociStitched
chr11	36169399	36188041	8_H3K27ac_0hour_q0.05_peak_15010_lociStitched
chr17	73245890	73267709	10_H3K27ac_0hour_q0.05_peak_39868_lociStitched
chr1	243401534	243433630	12_H3K27ac_0hour_q0.05_peak_8798_lociStitched
chr10	16853745	16876601	9_H3K27ac_0hour_q0.05_peak_9864_lociStitched
chr4	55794078	55827171	22_H3K27ac_0hour_q0.05_peak_67600_lociStitched
chr11	65322883	65345342	15_H3K27ac_0hour_q0.05_peak_15958_lociStitched
chr11	62644132	62664311	12_H3K27ac_0hour_q0.05_peak_15737_lociStitched
chr17	2286134	2311128	14_H3K27ac_0hour_q0.05_peak_36348_lociStitched
chr3	134165336	134205660	8_H3K27ac_0hour_q0.05_peak_63844_lociStitched
chr3	4893652	4910973	8_H3K27ac_0hour_q0.05_peak_59698_lociStitched
chr17	48201033	48239380	14_H3K27ac_0hour_q0.05_peak_38735_lociStitched
chr2	43173732	43211752	9_H3K27ac_0hour_q0.05_peak_47605_lociStitched
chr1	244462649	244489716	13_H3K27ac_0hour_q0.05_peak_8870_lociStitched
chr17	25877449	25906904	13_H3K27ac_0hour_q0.05_peak_37283_lociStitched
chr1	35290555	35332083	11_H3K27ac_0hour_q0.05_peak_2004_lociStitched
chr12	3225502	3278449	14_H3K27ac_0hour_q0.05_peak_18621_lociStitched
chr11	12131500	12161443	15_H3K27ac_0hour_q0.05_peak_14319_lociStitched
chr1	226837609	226865354	8_H3K27ac_0hour_q0.05_peak_8286_lociStitched
chr16	12496867	12512074	7_H3K27ac_0hour_q0.05_peak_33263_lociStitched
chr14	70161440	70194310	15_H3K27ac_0hour_q0.05_peak_28022_lociStitched
chr2	27994012	28033746	16_H3K27ac_0hour_q0.05_peak_46939_lociStitched
chr2	102079488	102114995	9_H3K27ac_0hour_q0.05_peak_49508_lociStitched
chr8	103816820	103823739	3_H3K27ac_0hour_q0.05_peak_88758_lociStitched
chr22	46391233	46410425	7_H3K27ac_0hour_q0.05_peak_59467_lociStitched
chr6	111872749	111896504	8_H3K27ac_0hour_q0.05_peak_79198_lociStitched
chr3	136555183	136621358	20_H3K27ac_0hour_q0.05_peak_63899_lociStitched
chr12	89762307	89785376	10_H3K27ac_0hour_q0.05_peak_21807_lociStitched
chr7	134462316	134499712	15_H3K27ac_0hour_q0.05_peak_85306_lociStitched
chr3	124480350	124527389	16_H3K27ac_0hour_q0.05_peak_63390_lociStitched
chr1	9327018	9381127	13_H3K27ac_0hour_q0.05_peak_449_lociStitched
chr15	99661873	99707154	8_H3K27ac_0hour_q0.05_peak_32605_lociStitched
chr4	186682549	186717444	19_H3K27ac_0hour_q0.05_peak_70537_lociStitched
chr12	56582145	56600578	15_H3K27ac_0hour_q0.05_peak_20830_lociStitched
chr13	21361441	21402500	20_H3K27ac_0hour_q0.05_peak_23816_lociStitched
chr4	79566506	79588844	18_H3K27ac_0hour_q0.05_peak_68092_lociStitched
chr3	43285654	43290815	3_H3K27ac_0hour_q0.05_peak_61154_lociStitched
chr19	45244034	45278866	17_H3K27ac_0hour_q0.05_peak_45083_lociStitched
chr1	11850484	11867105	8_H3K27ac_0hour_q0.05_peak_579_lociStitched
chr16	75373311	75386282	9_H3K27ac_0hour_q0.05_peak_35263_lociStitched
chr16	30062272	30089466	8_H3K27ac_0hour_q0.05_peak_33995_lociStitched
chr1	30180512	30186155	3_H3K27ac_0hour_q0.05_peak_1770_lociStitched
chr11	111577300	111637968	17_H3K27ac_0hour_q0.05_peak_17572_lociStitched
chr5	58571246	58598163	13_H3K27ac_0hour_q0.05_peak_71901_lociStitched
chr11	71638857	71660512	15_H3K27ac_0hour_q0.05_peak_16334_lociStitched
chr17	28049712	28089115	19_H3K27ac_0hour_q0.05_peak_37464_lociStitched
chr1	32528274	32542319	12_H3K27ac_0hour_q0.05_peak_1854_lociStitched
chr8	119068307	119124717	22_H3K27ac_0hour_q0.05_peak_89000_lociStitched
chr20	39619422	39638942	6_H3K27ac_0hour_q0.05_peak_55364_lociStitched
chr16	2054098	2098282	16_H3K27ac_0hour_q0.05_peak_32881_lociStitched
chr2	101943775	101958747	7_H3K27ac_0hour_q0.05_peak_49485_lociStitched
chr6	163773433	163790048	6_H3K27ac_0hour_q0.05_peak_81077_lociStitched
chr17	76911899	76933013	6_H3K27ac_0hour_q0.05_peak_40324_lociStitched
chr4	153164133	153188040	7_H3K27ac_0hour_q0.05_peak_69877_lociStitched
chr10	17064932	17074234	8_H3K27ac_0hour_q0.05_peak_9903_lociStitched
chr1	65885345	65898147	11_H3K27ac_0hour_q0.05_peak_3353_lociStitched
chr17	57439134	57466142	12_H3K27ac_0hour_q0.05_peak_39043_lociStitched
chr3	11674651	11686223	8_H3K27ac_0hour_q0.05_peak_60051_lociStitched
chr1	78510951	78545406	14_H3K27ac_0hour_q0.05_peak_3716_lociStitched
chr12	102249051	102297097	11_H3K27ac_0hour_q0.05_peak_22449_lociStitched
chr6	44007991	44041029	16_H3K27ac_0hour_q0.05_peak_77994_lociStitched
chr7	106228610	106250701	7_H3K27ac_0hour_q0.05_peak_84388_lociStitched
chr19	42615174	42627296	6_H3K27ac_0hour_q0.05_peak_44919_lociStitched
chr8	141643627	141678485	15_H3K27ac_0hour_q0.05_peak_89908_lociStitched
chr2	75724649	75750225	12_H3K27ac_0hour_q0.05_peak_48888_lociStitched
chr19	50167867	50195182	11_H3K27ac_0hour_q0.05_peak_45660_lociStitched
chr11	65373163	65383524	8_H3K27ac_0hour_q0.05_peak_15963_lociStitched
chr20	30180894	30211199	9_H3K27ac_0hour_q0.05_peak_54749_lociStitched
chr10	116382773	116414867	16_H3K27ac_0hour_q0.05_peak_13112_lociStitched
chr16	70715242	70744291	13_H3K27ac_0hour_q0.05_peak_35069_lociStitched
chr11	32102404	32125851	13_H3K27ac_0hour_q0.05_peak_14818_lociStitched
chr19	41854808	41882564	8_H3K27ac_0hour_q0.05_peak_44868_lociStitched
chr4	87920042	87975986	19_H3K27ac_0hour_q0.05_peak_68343_lociStitched
chr1	145427060	145480948	20_H3K27ac_0hour_q0.05_peak_5136_lociStitched
chr17	80163986	80205373	16_H3K27ac_0hour_q0.05_peak_40544_lociStitched
chr12	6130221	6350425	104_H3K27ac_1hour_q0.05_peak_20337_lociStitched
chr1	22184152	22307657	47_H3K27ac_1hour_q0.05_peak_1283_lociStitched
chr7	27135012	27232697	33_H3K27ac_1hour_q0.05_peak_89342_lociStitched
chr17	75081779	75251926	103_H3K27ac_1hour_q0.05_peak_43599_lociStitched
chr9	130496833	130700696	78_H3K27ac_1hour_q0.05_peak_101444_lociStitched
chr3	194818039	194992716	68_H3K27ac_1hour_q0.05_peak_72010_lociStitched
chr8	128805994	129014006	113_H3K27ac_1hour_q0.05_peak_97006_lociStitched
chr15	67357077	67493945	77_H3K27ac_1hour_q0.05_peak_33928_lociStitched
chr22	36699964	36796173	36_H3K27ac_1hour_q0.05_peak_63942_lociStitched
chr5	172257673	172387470	52_H3K27ac_1hour_q0.05_peak_81897_lociStitched
chr9	116336554	116421763	23_H3K27ac_1hour_q0.05_peak_100718_lociStitched
chr1	21574666	21672921	47_H3K27ac_1hour_q0.05_peak_1188_lociStitched
chr11	12131265	12310578	80_H3K27ac_1hour_q0.05_peak_15659_lociStitched
chr3	57984476	58107505	88_H3K27ac_1hour_q0.05_peak_67449_lociStitched
chr7	100728190	100784330	16_H3K27ac_1hour_q0.05_peak_91311_lociStitched
chr2	36579748	36799539	169_H3K27ac_1hour_q0.05_peak_51446_lociStitched
chr4	7759494	7942217	98_H3K27ac_1hour_q0.05_peak_72597_lociStitched
chr2	20713261	20836990	31_H3K27ac_1hour_q0.05_peak_50741_lociStitched
chr20	45922113	45991800	41_H3K27ac_1hour_q0.05_peak_60428_lociStitched
chr3	129268456	129347725	28_H3K27ac_1hour_q0.05_peak_69345_lociStitched
chr20	36677474	36802328	36_H3K27ac_1hour_q0.05_peak_59991_lociStitched
chr2	9314942	9522035	70_H3K27ac_1hour_q0.05_peak_50285_lociStitched
chr14	74178916	74270019	28_H3K27ac_1hour_q0.05_peak_30524_lociStitched
chr3	149223529	149378978	116_H3K27ac_1hour_q0.05_peak_69976_lociStitched
chr10	95158617	95274703	60_H3K27ac_1hour_q0.05_peak_13385_lociStitched
chr9	139507766	139581887	18_H3K27ac_1hour_q0.05_peak_102221_lociStitched
chr12	96719260	96915408	95_H3K27ac_1hour_q0.05_peak_24115_lociStitched
chr6	158402042	158505323	39_H3K27ac_1hour_q0.05_peak_87921_lociStitched
chr1	208323938	208418708	53_H3K27ac_1hour_q0.05_peak_8376_lociStitched
chr6	148610338	148831134	99_H3K27ac_1hour_q0.05_peak_87341_lociStitched
chr21	39796059	39879491	64_H3K27ac_1hour_q0.05_peak_62200_lociStitched
chr17	46618374	46704473	36_H3K27ac_1hour_q0.05_peak_41995_lociStitched
chr6	30684060	30796930	49_H3K27ac_1hour_q0.05_peak_83930_lociStitched
chr15	42186195	42265451	52_H3K27ac_1hour_q0.05_peak_32451_lociStitched
chr19	39126668	39225651	37_H3K27ac_1hour_q0.05_peak_48542_lociStitched
chr6	52353945	52442656	48_H3K27ac_1hour_q0.05_peak_85084_lociStitched
chr12	111834009	111905422	20_H3K27ac_1hour_q0.05_peak_24830_lociStitched
chr1	156039492	156137841	24_H3K27ac_1hour_q0.05_peak_6311_lociStitched
chr16	66390311	66442930	30_H3K27ac_1hour_q0.05_peak_37544_lociStitched
chr1	94485848	94576321	29_H3K27ac_1hour_q0.05_peak_4703_lociStitched
chr9	127004493	127083101	25_H3K27ac_1hour_q0.05_peak_101185_lociStitched
chr5	34648592	34771456	77_H3K27ac_1hour_q0.05_peak_77464_lociStitched
chr11	62305698	62390945	36_H3K27ac_1hour_q0.05_peak_17072_lociStitched
chr17	62566997	62747637	104_H3K27ac_1hour_q0.05_peak_42877_lociStitched
chr15	96863978	96904077	18_H3K27ac_1hour_q0.05_peak_35262_lociStitched
chr22	39601442	39728860	41_H3K27ac_1hour_q0.05_peak_64333_lociStitched
chr12	120661599	120706111	19_H3K27ac_1hour_q0.05_peak_25148_lociStitched
chr9	134529788	134615941	33_H3K27ac_1hour_q0.05_peak_101955_lociStitched
chr11	9633542	9788376	87_H3K27ac_1hour_q0.05_peak_15448_lociStitched
chr11	128547904	128653982	41_H3K27ac_1hour_q0.05_peak_19895_lociStitched
chr8	23145613	23275672	58_H3K27ac_1hour_q0.05_peak_94182_lociStitched
chr10	13798374	13937032	86_H3K27ac_1hour_q0.05_peak_10572_lociStitched
chr19	13190163	13305275	28_H3K27ac_1hour_q0.05_peak_47512_lociStitched
chr12	109184554	109252286	36_H3K27ac_1hour_q0.05_peak_24643_lociStitched
chr10	82202412	82275162	30_H3K27ac_1hour_q0.05_peak_13017_lociStitched
chr12	96557465	96667307	70_H3K27ac_1hour_q0.05_peak_24065_lociStitched
chr10	33482076	33626533	104_H3K27ac_1hour_q0.05_peak_11527_lociStitched
chr1	39568069	39680390	77_H3K27ac_1hour_q0.05_peak_2448_lociStitched
chr12	125135102	125235514	36_H3K27ac_1hour_q0.05_peak_25615_lociStitched
chr10	80826517	80957256	45_H3K27ac_1hour_q0.05_peak_12914_lociStitched
chr9	130257554	130351423	42_H3K27ac_1hour_q0.05_peak_101387_lociStitched
chr22	46390985	46512376	37_H3K27ac_1hour_q0.05_peak_64757_lociStitched
chr14	75019162	75150722	55_H3K27ac_1hour_q0.05_peak_30613_lociStitched
chr3	11195613	11293132	41_H3K27ac_1hour_q0.05_peak_65289_lociStitched
chr12	52278046	52321621	20_H3K27ac_1hour_q0.05_peak_22291_lociStitched
chr17	6914771	6965626	21_H3K27ac_1hour_q0.05_peak_39779_lociStitched
chr11	65238229	65278379	20_H3K27ac_1hour_q0.05_peak_17381_lociStitched
chr10	104339205	104421485	29_H3K27ac_1hour_q0.05_peak_13930_lociStitched
chr1	223886322	223965555	40_H3K27ac_1hour_q0.05_peak_8942_lociStitched
chr1	16460296	16514428	23_H3K27ac_1hour_q0.05_peak_906_lociStitched
chr17	2073543	2149260	27_H3K27ac_1hour_q0.05_peak_39435_lociStitched
chr11	65138108	65223183	26_H3K27ac_1hour_q0.05_peak_17347_lociStitched
chr12	54788811	54833547	24_H3K27ac_1hour_q0.05_peak_22517_lociStitched
chr5	42982138	43044981	23_H3K27ac_1hour_q0.05_peak_77689_lociStitched
chr5	14142281	14282197	89_H3K27ac_1hour_q0.05_peak_76940_lociStitched
chr11	33710128	33764131	31_H3K27ac_1hour_q0.05_peak_16239_lociStitched
chr20	31019869	31106314	37_H3K27ac_1hour_q0.05_peak_59611_lociStitched
chr19	41812338	41883058	20_H3K27ac_1hour_q0.05_peak_48741_lociStitched
chr5	151038724	151079802	13_H3K27ac_1hour_q0.05_peak_81347_lociStitched
chr12	52344841	52476413	37_H3K27ac_1hour_q0.05_peak_22325_lociStitched
chr2	71679564	71737934	26_H3K27ac_1hour_q0.05_peak_53023_lociStitched
chr1	85724366	85812073	52_H3K27ac_1hour_q0.05_peak_4270_lociStitched
chr17	38439506	38520396	26_H3K27ac_1hour_q0.05_peak_41283_lociStitched
chr10	74055804	74125236	18_H3K27ac_1hour_q0.05_peak_12566_lociStitched
chr1	235092692	235148952	24_H3K27ac_1hour_q0.05_peak_9566_lociStitched
chr13	97873725	97962014	57_H3K27ac_1hour_q0.05_peak_27745_lociStitched
chr6	112465925	112576629	79_H3K27ac_1hour_q0.05_peak_86143_lociStitched
chr2	201979109	202058188	32_H3K27ac_1hour_q0.05_peak_56706_lociStitched
chr1	204378384	204489999	40_H3K27ac_1hour_q0.05_peak_8064_lociStitched
chr17	1933489	2010660	29_H3K27ac_1hour_q0.05_peak_39413_lociStitched
[truncated: 4,218 more rows]

## Sheet: ERG
chr	start	end	peak
chr1	24917	25068	H0-MACS_peak_1
[truncated: 14,158 more rows]

## Sheet: ETS1
chr	start	end	peak
[truncated: 109,313 more rows]

[truncated: 6 more sheets: FLI, JUN, RBPJ, GATA2, EP300, EZH2]
