# Supplementary material for: A dynamic and integrated epigenetic program at distal regions orchestrates transcriptional responses to VEGFA
Source: HighWire-hosted journal article supplement (doi:10.1101/gr.239053.118), 2019-01-22
Supplement: Supplemental_Table_S4.xlsx [file Supplemental_Table_S4.xlsx]

## Sheet: Total oligos
Supplemental_Table_4: The sequence information of oligos used in this study.
Primers
RT-PCR	Forward	Reverse
MAFF	AGGAGTTTGAGACCAGCCTG	GGAGGGTTTGGAGGGCATAT
MAFG	TTCTGGAGTTTCGAGGCCAT	CACACCTGCACATGAACACA
MAFK	TCCTTCCAAGAGCACTGAGG	CCTTGCAGGTCTTATGTGGC
GAPDH	ATGACATCAAGAAGGTGGTG	CATACCAGGAAATGAGCTTG
ETS1	GAGATCCTGCAGAAAGAGGATG	GGAGCGTCTGATAGGACTCTGT
EGR3	AACTCTCTTACTCCGGCTCCTT	TGAGGCTAATGATGTTGTCCTG
ADAMTS9	GCAGGGAACACAGCCTACTATC	TTTAAAACATGATCGCATCCAG
PPARA	CAAGGCCTCAGGCTATCATTAC	GGCACTTGTGAAATCGACAATA
FOSL2	AGGAGAAGGAGAAGCTGGAGTT	GGCTCCTGTTTCACCACTACA
VGLL4	GGGAGAACCCAGAATACAGACC	AGTCTCCATTGGCAGTCTTGTT
VEGF	CCTTGCTGCTCTACCTCCAC	ATCTGCATGGTGATGTTGGA
FGF2	CGTTACCTGGCTATGAAGGAAG	ATACTGCCCAGTTCGTTTCAGT
IL6	CCAGGAGAAGATTCCAAAGATG	TGGAAGGTTCAGGTTGTTTTCT
ANGPT1	TTCAGAACCACACGGCTACCAT	TCTTCCTTGTGTTTTCCT TCCATT
TGFB1	CCCTGGACACCAACTATTGC	CTTCCAGCCGAGGTCCTT
BMP2	TTTGCACCAAGATGAACACAGC	TGTTTGTGTTTGGCTTGACGTT
JAG1	TTTGGAGCGACCTGTGTGGATGAGA	TGGTGATGCAAGGTCTCCCTGAAACT
ANGPT2	TAAGGACCCCACTGTTGCTAAAGA	AATAATTGTCCACCCGCCTCCTC
ChIP-qPCR	Sequence
CTR_F	TCCCGAGAGTACTACTTCAACG	Category
CTR_R	CTCCACAGGTGCTCACTAACAC	CTR
S1(H0)_F	CCCGGCCTACAGTCTTTATTGA	CTR
S1(H0)_R	TAAGGAGAGGACCCAGCTAAAC	AE
S2(H0)_F	AAGCTGGATTCCCTTCTCAAGA	AE
S2(H0)_R	ATTGCTTTCTTCAGGCTGTTGG	AE
S3(H1)_F	CATATGAACAGCTGACCATGGG	AE
S3(H1)_R	CCCTCTGTAGTTTTGCATCTGG	AE
S4(H1)_F	TATAGCAATGCAGAGGGGAGAG	AE
S4(H1)_R	GCGAACGTTCATTCCTCTCTAC	AE
S5(H4)_F	GCTCTTTGGAATGTGAAATGTCC	AE
S5(H4)_R	CTTCTCCCTGTAATTGCCACTG	AE
S6(H4)_F	ATTCATCTTCTGCAGGACAACC	AE
S6(H4)_R	AGTTTACCTCATAGTCAGCCACA	AE
S7(H12)_F	CAACAGAAGCCAAGGAAGAACA	AE
S7(H12)_R	TTGTGTCATGGAATCTTGAGCC	AE
S8(H12)_F	GGCCAATGTCAAGAAACCAGAT	AE
S8(H12)_R	AGCTCTTCCTTACTTTCTGGCA	AE
S9(H0-1-4-12)_F	ACCCAAAACAATGAAGCCTGAA	AE
S9(H0-1-4-12)_R	GCAGAACCATTCCAAAGCTACT	AE
S10(H0-1-4-12)_F	CTTGAACTTGGGAGGTAGAGGT	AE
S10(H0-1-4-12)_R	AAGTGCTAGGATTACAGGCGTG	AE
S1(H0)_F	GCAGCCTGTTGTCTATCTGTCT	AE
S1(H0)_R	TCTACACACCCACAACAAACAC	RE
S2(H0)_F	ACTCCTTCATGTGCAAAACTCC	RE
S2(H0)_R	TTCAGAGAACACGGAGAAGTCA	RE
S3(H1)_F	TGGCAAAGAATGGAAGGAAAGG	RE
S3(H1)_R	TGAGGAAGGATGAAAGGGTGAG	RE
S4(H1)_F	TGGCCATTCTATCTCTGACCAA	RE
S4(H1)_R	GTCTCACTCTATTGCCCAGGAT	RE
S7(H12)_F	TGGGGACTTGTTGGAGGATAAA	RE
S7(H12)_R	TGGGATAGGGAGAGAATGGAGA	RE
S8(H12)_F	TCCATGGAGTTAAGGGGTCATT	RE
S8(H12)_R	AGCCCACAAATTCAAGCTGTAG	RE
S9(H0-1-4-12)_F	GAAGACCTCACGCTCTCTTTTC	RE
S9(H0-1-4-12)_R	AATGAAATGGAAGGTAGGCAGC	RE
S10(H0-1-4-12)_F	AACAGGCTGCATGTGGTAAAAT	RE
S10(H0-1-4-12)_R	CTCATCTGTCCATCTCTCCTCC	RE
S1(H0)_F	GAAGAGGAGACATTCAAAGGCC	RE
S1(H0)_R	TGATTGGGCCTGCTTATCTTTG	PE
S2(H0)_F	GAGAGCAGGGACCATATCTTGA	PE
S2(H0)_R	CTGGCCCTCCTTGTTAATTCTG	PE
S3(H1)_F	TGCAATGTGTTCTCCCTATGTC	PE
S3(H1)_R	CTTGGATTTGAGTCAGCCAGAG	PE
S4(H1)_F	AGATCCCCTCTTTGAGACAGTG	PE
S4(H1)_R	TGATCTGTTCTGTCCCCTAAGG	PE
S5(H4)_F	TGAAGGAAGGGTTGTAATGCAC	PE
S5(H4)_R	AGGAAGATGATTCGTTCTCCCA	PE
S6(H4)_F	ACTCCACACTTTCCTTTCCTCT	PE
S6(H4)_R	ATCATGTAGCCAGTGACCTCTT	PE
S7(H12)_F	GGCTTTACTGGACAGACACATG	PE
S7(H12)_R	CCAGTGGAATTCATCTGCAGTT	PE
S8(H12)_F	CGTTAAACAATGTAGCCCCGAT	PE
S8(H12)_R	TGGCAGAGTAATTCGGTACAGA	PE
S9(H0-1-4-12)_F	cccttgcaccaattactgacat	PE
S9(H0-1-4-12)_R	AGCACTTGGGAGACATAGGAAT	PE
S10(H0-1-4-12)_F	GCTCAGATCAAGTTTAGCCCTT	PE
S10(H0-1-4-12)_R	CCATTGTCAAATCCACGCAGAA	PE
S1(H0)_F	AGACATAGCTCGCATGCCTTAT	PE
S1(H0)_R	CCATACACTGCACCACCACG	ETS1
S2(H0)_F	gattctcactttgtcacccagg	ETS1
S2(H0)_R	acaaatattagccaggcaaggt	ETS1
S3(H1)_F	AACTGCCGAATAAACACACCAA	ETS1
S3(H1)_R	GGGTCACTTCATTCCAACTCTG	ETS1
S4(H1)_F	AGCTGCAGAATTCCTTAGTCCT	ETS1
S4(H1)_R	CTGATCATTGGCATTCTGGTGT	ETS1
S5(H4)_F	TCTATCCTCTGTCCAGCTTCAG	ETS1
S5(H4)_R	GGGACAGTTGGCAAATGACTAA	ETS1
S6(H4)_F	CTGGCAAGGAGAGAGAGGATAC	ETS1
S6(H4)_R	GATGCTGGGAGATGTAGTTGC	ETS1
S7(H12)_F	GTGAGGGTCAACAAGTAATGGG	ETS1
S7(H12)_R	AGGCATGAAGTAAAGACCTGGA	ETS1
S8(H12)_F	CAGTGCTGGAGTGTTTTGATAAA	ETS1
S8(H12)_R	GAGTTCAAGGAGTTCACCACAC	ETS1
S9(H0-1-4-12)_F	ATGTAGTCTCCTCACTGCCTTC	ETS1
S9(H0-1-4-12)_R	tgcctggcctggattttatatg	ETS1
S10(H0-1-4-12)_F	cGAGAGTAACTTTCACTGCACC	ETS1
S10(H0-1-4-12)_R	CTGTTCGTTCAGCCTTCAAACC	ETS1
S1(H0)_F	TGATCTCAGGCATCGTCTCC	ETS1
S1(H0)_R	cccTGATTGGTTGGATGCTG	Fli1
S2(H0)_F	CTGAGTGGAAGCAGGGTTCA	Fli1
S2(H0)_R	GGAGAAACGCCTGAAAGCTTC	Fli1
S3(H1)_F	tagagccagagtttcaccatgt	Fli1
S3(H1)_R	cccggttgcaggataaacatag	Fli1
S4(H1)_F	CCTGTTTGTCTTTGCATCTCCT	Fli1
S4(H1)_R	AGCTGCTTCCTGACTCTTCTTA	Fli1
S5(H4)_F	TGTTTTCCACTGATGACTGCG	Fli1
S5(H4)_R	GACTCCCTGTGTCCGGATAAC	Fli1
S6(H4)_F	GGGAACGAAGATTAAGTCAGCC	Fli1
S6(H4)_R	GGCTGCGTGGAGAATACTTTT	Fli1
S7(H12)_F	GCCTGGATTGATTACTTAGCCC	Fli1
S7(H12)_R	ATTACTTTGCTGCCTCTGTGTG	Fli1
S8(H12)_F	TGCTTGGAATTTATCACGGTCC	Fli1
S8(H12)_R	TCCTGGGGAAGCAAATGAATTC	Fli1
S9(H0-1-4-12)_F	AGTTCCATTGTCTGTTCTTGCG	Fli1
S9(H0-1-4-12)_R	TGACTCGCTTTGACTTTGCAA	Fli1
S10(H0-1-4-12)_F	ACCAAGACAGTGCGAGAGTC	Fli1
S10(H0-1-4-12)_R	TCTCTATGGTTGGTTCCTCAGG	Fli1
		Fli1
3C experiments
DUSP1_P1	CAGTCTGTGAAGGCCCTCTATA
DUSP1_P2	GCTTTGGGACTTATTCACCTCC
DUSP1_P3	AACGTTTCTAGCTGCAGGAAAG
DUSP1_P4	CACAGGAGCCAGTTTAAAGAGG
DUSP1_P5	GTGTGTACAGAGGGAGAGAGAG
DUSP1_P6	AAGTGTCGTGGTTATGTGGATG
DUSP1_P7	CTTCCTTCCCTCCTTCCTTTCT
DUSP1_P8	CTCCCCTGCACAAGTCATAAAG
DUSP1_P9	AACCTCTCTGAACTTCTGTCGT
DUSP1_P10	TCTCAAGAAGAAATGCAGGCTG
DUSP1_P11	GGGAAGGAGCACAAAGGAATTT
DUSP1_P12	ACTTGCAAACTAACAACGAGCT
DUSP1_P13	AAGAGGTTTATTTGGCCCACAG
DUSP1_P14	AAGGGAAGGAAGGAAGGAAGG
DUSP1_P15	CCCAGCTTCAAGTCATCTCAAC
DUSP1_P16	AGGGATGCTCTTGTACTGGTAG
DUSP1_P17 (ANC)	GGTCCCCAGTACAGATCTCAAA
DUSP1_P18	TTGGATAGGGTGACTCGATACC
DUSP1_P19	TTGGGATTATAGGTGTGAGCCA
DUSP1_P20	AATCCCAGCTATTCAAGAGGCT
DUSP1_P21	AAGTCAAGGAATCTGCATGGTG
DUSP1_P22	ATGGAATGTTCTTGTCACGTGG
DUSP1_P23	CCCATAGCCCTAGTTACAGTGT
DUSP1_P24	ACTACTGGTGGGAAATGTAGCA
DUSP1_Taqman	FAM' TGAGTCACGGAGGCCCTGCTGTTC 'TAMRA
BZ_VWF_Q1	GCAGAACCATGAAACAAGAAGAC
BZ_VWF_Q1	CCCTGTTCATAGGATACAAGCTG
BZ_VWF_Q2	ATGAAACTGGACCCCTATCTCTC
BZ_VWF_Q2	TAGGCCAATGTCCAGTACAGTTT
siRNA oligo	Forward	Reverse
CTR	UUCUCCGAACGUGUCACGUTT	ACGUGACACGUUCGGAGAATT
MAFK	CGUGGUAGGUAAUCCAUAUTT	AUAUGGAUUACCUACCACGTT
MAFF	GCGUCAUCACCAUCGUCAATT	UUGACGAUGGUGAUGACGCTT
MAFG	GCACUGAACAAGACCAAAUTT	AUUUGGUCUUGUUCAGUGCTT
Index primers for NGS
Index_DM1	CAAGCAGAAGACGGCATACGAGATCGTGATGTGACTGGAGTTCAGACGTGTGCTCTTCCGATCT
Index_DM2	CAAGCAGAAGACGGCATACGAGATACATCGGTGACTGGAGTTCAGACGTGTGCTCTTCCGATCT
Index_DM3	CAAGCAGAAGACGGCATACGAGATGCCTAAGTGACTGGAGTTCAGACGTGTGCTCTTCCGATCT
Index_DM4	CAAGCAGAAGACGGCATACGAGATTGGTCAGTGACTGGAGTTCAGACGTGTGCTCTTCCGATCT
Index_DM5	CAAGCAGAAGACGGCATACGAGATCACTGTGTGACTGGAGTTCAGACGTGTGCTCTTCCGATCT
Index_DM6	CAAGCAGAAGACGGCATACGAGATATTGGCGTGACTGGAGTTCAGACGTGTGCTCTTCCGATCT
Index_DM7	CAAGCAGAAGACGGCATACGAGATGATCTGGTGACTGGAGTTCAGACGTGTGCTCTTCCGATCT
Index_DM8	CAAGCAGAAGACGGCATACGAGATTCAAGTGTGACTGGAGTTCAGACGTGTGCTCTTCCGATCT
Index_DM9	CAAGCAGAAGACGGCATACGAGATCTGATCGTGACTGGAGTTCAGACGTGTGCTCTTCCGATCT
Index_DM10	CAAGCAGAAGACGGCATACGAGATAAGCTAGTGACTGGAGTTCAGACGTGTGCTCTTCCGATCT
Index_DM11	CAAGCAGAAGACGGCATACGAGATGTAGCCGTGACTGGAGTTCAGACGTGTGCTCTTCCGATCT
Index_DM12	CAAGCAGAAGACGGCATACGAGATTACAAGGTGACTGGAGTTCAGACGTGTGCTCTTCCGATCT
Index_DM13	CAAGCAGAAGACGGCATACGAGATTTCGACGTGACTGGAGTTCAGACGTGTGCTCTTCCGATCT
Index_DM14	CAAGCAGAAGACGGCATACGAGATTTAGCTGTGACTGGAGTTCAGACGTGTGCTCTTCCGATCT
Index_DM15	CAAGCAGAAGACGGCATACGAGATTTTGCAGTGACTGGAGTTCAGACGTGTGCTCTTCCGATCT
Index_DM16	CAAGCAGAAGACGGCATACGAGATGGTATTGTGACTGGAGTTCAGACGTGTGCTCTTCCGATCT
ODN
MAF ODN	T*A*G*T*G*C*T*G*A*C*T*C*A*G*C*A*A*G*T*C*
MOCK ODN	T*A*G*T*T*C*T*G*A*C*T*C*A*G*A*A*A*G*T*C*	*: phosphorothioate
		*: phosphorothioate
