# Supplementary material for: A dynamic and integrated epigenetic program at distal regions orchestrates transcriptional responses to VEGFA
Source: HighWire-hosted journal article supplement (doi:10.1101/gr.239053.118), 2019-01-22
Supplement: Supplemental_Table_S5.xlsx [file Supplemental_Table_S5.xlsx]

## Sheet: Sheet1
Supplemental_Table_S5: The antibody information of manufacture, catalog number and applications.
Antibodies	Catalog#	Company	Application
H3K4me2	Ab32356	Abcam	CHIP
H3K27ac	Ab4729	Abcam	CHIP
EP300	C585	Santa Cruz	CHIP
ETS1	SC350X	Santa Cruz	CHIP&WB
H3K4me1	ab8895	Abcam	CHIP
H3K4me3	39159	Active Motif	CHIP
H3K36me3	ab9050	Abcam	CHIP
H3K27me3	17-622	Millipore	CHIP
RNAPII	05-623	Millipore	CHIP
ERG	SC-354	Santa Cruz	CHIP&WB
EZH2	5246	Cell signaling	CHIP&WB
RBPJ	5313	Cell Signaling	CHIP&WB
C-JUN	9165	Cell Signaling	CHIP&WB
FLI-1	sc-356	Santa Cruz	CHIP&WB
GATA2		Gift From Emery H. Bresnick	CHIP&WB
SUZ12	3737	Cell signaling	CHIP&WB
NICD	4147	Cell signaling	WB
ERK	4695	Cell signaling	WB
P-ERK	9101	Cell Signaling	WB
MAFF	A12920	ABclonal	WB
MAFG	A16056	ABclonal	WB
MAFK	ab50322	Abcam	WB
PECAM1	550274	BD Bioscience	IF
UEA I	B-1065	Vector Lab	IF
KI67	ab156956	Abcam	IF
Caspase3	AB3623	Millipore	IF
